# Supplementary material for: Analysis of Common and Specific Mechanisms of Liver Function Affected by Nitrotoluene Compounds
Source: PLoS One. 2011 Feb 8;6(2):e14662. doi: 10.1371/journal.pone.0014662 (PMC3035612; doi:10.1371/journal.pone.0014662)
Supplement: Table S2 — A table (supplementary table 2) providing a list of genes that were significantly regulated by 2,4DNT at 48 h. (0.04 MB XLSX) [file pone.0014662.s002.xlsx]

## Sheet: 24DNT48hn
Supplementary table 2 Significantly regulated genes by 2,4DNT at 48h
ProbeName	Corrected p-value	p-value	["RatL2,4DNT48h_C"](normalized)	["RatL2,4DNT48h_4.98"](normalized)	["RatL2,4DNT48h_49.8"](normalized)	["RatL2,4DNT48h_99.5"](normalized)	["RatL2,4DNT48h_199"](normalized)	Common name	GeneSymbol	Description	GenbankAccession	ControlType
A_42_P463675	0.000767881	0.000441853	0.0875004	0.020434	-0.177054	-0.0670876	-1.62344	NM_030842	Itga7	Rattus norvegicus integrin alpha 7 (Itga7), mRNA [NM_030842]	NM_030842	FALSE
A_42_P473398	0.000144769	2.34203e-05	0.282391	-0.385106	0.238649	0.650732	4.18042	NM_030845	Cxcl1	Rattus norvegicus chemokine (C-X-C motif) ligand 1 (Cxcl1), mRNA [NM_030845]	NM_030845	FALSE
A_42_P550914	0.000970713	0.000675568	-0.0236591	-0.129135	0.415801	0.227483	-1.95008	NM_212507	Ltb	Rattus norvegicus lymphotoxin B (Ltb), mRNA [NM_212507]	NM_212507	FALSE
A_42_P557394	0.00112213	0.000899363	-0.487197	-1.04169	-0.344341	-0.319674	1.48552	NM_001008510	Isg20	Rattus norvegicus interferon stimulated exonuclease 20 (Isg20), mRNA [NM_001008510]	NM_001008510	FALSE
A_42_P570313	0.00104455	0.000781952	-0.170829	-0.361622	0.131174	-0.393719	-2.73767	NM_133295	Ces3	Rattus norvegicus carboxylesterase 3 (Ces3), mRNA [NM_133295]	NM_133295	FALSE
A_42_P577421	0.000288439	8.09134e-05	-0.163604	-0.198038	-0.104865	-0.738207	1.88361	ENSRNOT00000007789	Nnmt_predicted	PREDICTED: Rattus norvegicus nicotinamide N-methyltransferase (predicted) (Nnmt_predicted), mRNA [XM_217138]		FALSE
A_42_P624403	0.000854436	0.000529846	-0.33255	-0.197912	0.0358236	-0.647364	-2.77863	NM_017126	Fdx1	Rattus norvegicus ferredoxin 1 (Fdx1), mRNA [NM_017126]	NM_017126	FALSE
A_42_P634930	0.000262914	6.23216e-05	0.211062	-0.241078	0.085345	-0.22323	-2.19989	NM_175578	Dscr1l1	Rattus norvegicus Down syndrome critical region gene 1-like 1 (Dscr1l1), mRNA [NM_175578]	NM_175578	FALSE
A_42_P637279	0.000303457	9.15458e-05	0.406941	-0.198763	0.416198	0.0147369	-1.61027	NM_012743	Foxa2	Rattus norvegicus forkhead box A2 (Foxa2), mRNA [NM_012743]	NM_012743	FALSE
A_42_P647072	0.000817647	0.000484193	-0.803368	-1.01067	-0.428517	-0.535513	0.912548	NM_178102	Mapkapk2	Rattus norvegicus MAP kinase-activated protein kinase 2 (Mapkapk2), mRNA [NM_178102]	NM_178102	FALSE
A_42_P664259	0.000691815	0.0003633	0.119428	-0.150799	-0.0735616	-0.210484	-1.40899	NM_024396	Abca2	Rattus norvegicus ATP-binding cassette, sub-family A (ABC1), member 2 (Abca2), mRNA [NM_024396]	NM_024396	FALSE
A_42_P671800	3.97781e-06	3.69052e-08	-0.289243	-0.046312	0.21358	-0.326997	-3.74013	NM_019293	Ca5a	Rattus norvegicus carbonic anhydrase 5a, mitochondrial (Ca5a), mRNA [NM_019293]	NM_019293	FALSE
A_42_P698240	0.000773672	0.000449508	-0.301986	-0.177555	0.381028	-0.228818	-1.86419	NM_138863	Ltb4dh	Rattus norvegicus leukotriene B4 12-hydroxydehydrogenase (Ltb4dh), mRNA [NM_138863]	NM_138863	FALSE
A_42_P703548	0.000377435	0.000127257	0.543591	0.336762	0.0547974	-0.321337	-2.10169	NM_053902	Kynu	Rattus norvegicus kynureninase (L-kynurenine hydrolase) (Kynu), mRNA [NM_053902]	NM_053902	FALSE
A_42_P706230	7.43925e-06	1.39807e-07	0.522553	0.427338	0.224245	-0.113278	-4.34673	XM_239260	Sez6	PREDICTED: Rattus norvegicus seizure related 6 homolog (mouse) (Sez6), mRNA [XM_239260]	XM_239260	FALSE
A_42_P716352	0.000282469	7.6133e-05	-0.361594	-0.156083	0.171306	-0.354395	-2.10466	NM_031154	Gstm3	Rattus norvegicus glutathione S-transferase, mu type 3 (Gstm3), mRNA [NM_031154]	NM_031154	FALSE
A_42_P721270	0.00136345	0.00118064	-0.352931	-0.186679	0.0354192	-0.370063	-1.63626	NM_030866	Nfix	Rattus norvegicus nuclear factor I/X (Nfix), mRNA [NM_030866]	NM_030866	FALSE
A_42_P761436	0.000262914	6.68524e-05	-0.278435	-0.65121	0.100962	-0.163541	1.80614	NM_153294	LOC259224	Rattus norvegicus prepro-Neuropeptide W polypeptide (LOC259224), mRNA [NM_153294]	NM_153294	FALSE
A_42_P793598	0.000377435	0.000128623	0.279255	0.027082	0.401995	-0.375092	-1.76212	NM_194354	LOC378467	Rattus norvegicus promethin (LOC378467), mRNA [NM_194354]	NM_194354	FALSE
A_42_P800771	0.000764864	0.000432336	-1.36357	-1.40345	-0.752182	-0.136184	1.09298	XM_240367	RGD1563825_predicted	PREDICTED: Rattus norvegicus similar to ENSANGP00000020885 (predicted) (RGD1563825_predicted), mRNA [XM_240367]	XM_240367	FALSE
A_42_P805088	0.00148538	0.00134431	-0.165074	-0.206692	0.0413516	-0.131454	-1.25296	XM_001065720	LOC685909	PREDICTED: Rattus norvegicus similar to H2A histone family, member V isoform 1 (LOC685909), mRNA [XM_001065720]	XM_001065720	FALSE
A_42_P819052	0.0221823	0.0214387	-0.253211	-1.04812	-0.205746	-0.951627	0.890882	XM_219895	XM_219895	Rattus norvegicus similar to Cgi67 serine protease precursor (LOC309399), mRNA [XM_219895]	XM_219895	FALSE
A_42_P837214	0.00104339	0.000774265	-0.562489	-0.809483	-0.426361	-0.360402	1.58302	NM_012861	Mgmt	Rattus norvegicus O-6-methylguanine-DNA methyltransferase (Mgmt), mRNA [NM_012861]	NM_012861	FALSE
A_42_P842946	0.00112213	0.000902719	-1.29918	-1.1801	-0.687857	-0.38	0.593319	NM_001025732	Nol5a	Rattus norvegicus nucleolar protein 5A (Nol5a), mRNA [NM_001025732]	NM_001025732	FALSE
A_43_P10101	1.43556e-05	5.61392e-07	0.388559	0.0472354	0.469499	0.309996	-2.01443	TC589562	TC589562			FALSE
A_43_P10140	0.00100038	0.000721142	-0.113061	-0.279011	-0.241274	-0.737115	-4.12305	XM_215137	XM_215137	Rattus norvegicus similar to RIKEN cDNA A330009E03 (LOC293779), mRNA [XM_215137]	XM_215137	FALSE
A_43_P10225	0.000262914	6.42859e-05	-0.0410184	-0.545886	0.255258	-0.23517	-1.6699	XM_341940	Fgfr2	PREDICTED: Rattus norvegicus fibroblast growth factor receptor 2 (Fgfr2), mRNA [XM_341940]	XM_341940	FALSE
A_43_P10568	0.000501318	0.000205368	-0.301153	-0.102124	-0.0420709	-0.952331	-4.08043	CB544298	CB544298	CB544298 AMGNNUC:NRDG1-00164-C9-A nrdg1 (10855) Rattus norvegicus cDNA clone nrdg1-00164-c9 5', mRNA sequence [CB544298]	CB544298	FALSE
A_43_P10714	0.00122753	0.0010218	-0.0240955	0.014502	-0.150265	-0.697803	-2.16213	XM_001053368	RGD1559803_predicted	PREDICTED: Rattus norvegicus similar to maestro (predicted) (RGD1559803_predicted), mRNA [XM_001053368]	XM_001053368	FALSE
A_43_P10785	0.000646482	0.000325047	-0.0077455	-0.232055	-0.081342	-0.42765	-2.10776	NM_001008770	RGD1306952	Rattus norvegicus similar to Ab2-225 (RGD1306952), mRNA [NM_001008770]	NM_001008770	FALSE
A_43_P10814	0.000262914	6.90332e-05	-0.966131	0.220699	-1.68513	-1.8233	2.36157	ENSRNOT00000014348	ENSRNOT00000014348	Nocturnin (CCR4 protein homolog) (Fragment). [Source:Uniprot/SWISSPROT;Acc:Q9ET55] [ENSRNOT00000014348]		FALSE
A_43_P11122	0.000262914	6.77364e-05	0.169406	-0.0342651	0.407821	-0.287862	-1.15408	TC622035	TC622035	Q92GV3_RICCN (Q92GV3) AmpG protein, partial (6%) [TC622035]		FALSE
A_43_P11192	0.00042652	0.000164413	-0.0956641	0.0234269	-0.0770143	-0.336267	-1.71045	NM_001014147	RGD1310571	Rattus norvegicus similar to hypothetical protein (RGD1310571), mRNA [NM_001014147]	NM_001014147	FALSE
A_43_P11370	0.000233844	4.83366e-05	-0.186725	-0.447058	-0.217085	-0.29872	-1.75036	NM_207601	Plp2	Rattus norvegicus proteolipid protein 2 (Plp2), mRNA [NM_207601]	NM_207601	FALSE
A_43_P11472	0.000144769	2.4696e-05	-0.442737	-0.499947	-0.397512	-0.761134	1.61358	NM_012580	Hmox1	Rattus norvegicus heme oxygenase (decycling) 1 (Hmox1), mRNA [NM_012580]	NM_012580	FALSE
A_43_P11686	5.83201e-05	5.21297e-06	0.0922575	0.174429	-0.0229695	-0.46247	-1.8506	NM_013062	Kdr	Rattus norvegicus kinase insert domain protein receptor (Kdr), mRNA [NM_013062]	NM_013062	FALSE
A_43_P11724	0.000503911	0.000213951	0.416413	-0.278139	0.221081	0.079293	-2.87197	NM_013120	Gckr	Rattus norvegicus glucokinase regulatory protein (Gckr), mRNA [NM_013120]	NM_013120	FALSE
A_43_P11991	0.00086036	0.000552745	-0.884864	-0.90803	-0.841792	-1.10796	2.33898	NM_019242	Ifrd1	Rattus norvegicus interferon-related developmental regulator 1 (Ifrd1), mRNA [NM_019242]	NM_019242	FALSE
A_43_P12236	0.00024557	5.23609e-05	0.295659	0.265396	0.180196	-0.616504	-1.27152	NM_022521	Oat	Rattus norvegicus ornithine aminotransferase (Oat), mRNA [NM_022521]	NM_022521	FALSE
A_43_P12622	0.000524689	0.000243292	0.355346	0.533254	0.301808	-0.591523	-2.79217	NM_031640	Pgcp	Rattus norvegicus plasma glutamate carboxypeptidase (Pgcp), mRNA [NM_031640]	NM_031640	FALSE
A_43_P12665	0.00494772	0.00467131	-0.297873	-0.84402	-0.0940075	-0.69942	1.13988	NM_031757	Mmp24	Rattus norvegicus matrix metallopeptidase 24 (Mmp24), mRNA [NM_031757]	NM_031757	FALSE
A_43_P12769	0.00148538	0.00134224	-0.593831	-0.862185	-0.021415	-0.172428	-3.68366	NM_053329	Igfals	Rattus norvegicus insulin-like growth factor binding protein, acid labile subunit (Igfals), mRNA [NM_053329]	NM_053329	FALSE
A_43_P12811	0.000672878	0.000342077	-1.30386	-1.29536	-0.621632	-0.591946	0.489112	NM_053464	Srm	Rattus norvegicus spermidine synthase (Srm), mRNA [NM_053464]	NM_053464	FALSE
A_43_P13378	7.43925e-06	1.6624e-07	0.323691	-0.00441825	0.515454	-0.254936	-2.38552	NM_139258	Bmf	Rattus norvegicus Bcl2 modifying factor (Bmf), mRNA [NM_139258]	NM_139258	FALSE
A_43_P14032	0.000743848	0.000411402	-0.347262	-0.306876	-0.135624	-0.506019	-1.78141	XM_001054222	RGD1561800_predicted	PREDICTED: Rattus norvegicus similar to CDNA sequence BC027309 (predicted) (RGD1561800_predicted), mRNA [XM_001054222]	XM_001054222	FALSE
A_43_P14162	3.97781e-06	4.44448e-08	0.337467	0.528548	0.778821	0.965931	7.05737	NM_012488	A2m	Rattus norvegicus alpha-2-macroglobulin (A2m), mRNA [NM_012488]	NM_012488	FALSE
A_43_P14262	0.00134621	0.00114568	0.191078	-0.248863	-0.105637	-0.463671	-1.70178	ENSRNOT00000061677	RGD1565310_predicted	PREDICTED: Rattus norvegicus similar to RIKEN cDNA 1110018J12 (predicted) (RGD1565310_predicted), mRNA [XM_001057346]		FALSE
A_43_P14910	0.000695909	0.000377113	0.345787	0.142095	0.229206	-0.180534	-2.01887	NM_012545	Ddc	Rattus norvegicus dopa decarboxylase (Ddc), mRNA [NM_012545]	NM_012545	FALSE
A_43_P15154	0.00024557	5.6248e-05	-0.376513	-0.29946	0.0703696	-0.0524609	-2.63248	XM_576589	Ihh	PREDICTED: Rattus norvegicus Indian hedgehog homolog, (Drosophila) (Ihh), mRNA [XM_576589]	XM_576589	FALSE
A_43_P15669	0.000958019	0.000652952	0.312003	0.361003	0.48483	-0.165705	-1.65265	M22631	Pcca	Rat alpha-propionyl-CoA carboxylase mRNA, complete cds [M22631]	M22631	FALSE
A_43_P16045	0.000233844	4.73996e-05	1.0182	0.458064	-0.294186	0.283146	2.56785	AB072252	AB072252	Rattus norvegicus cDNA, clone:bA7, differentially expressed in pylorus [AB072252]	AB072252	FALSE
A_43_P16562	0.000508611	0.000224667	-0.0740161	-0.334648	-0.253628	-0.727498	-2.26637	NM_001008360	RGD1310686	Rattus norvegicus similar to chromosome 16 open reading frame 5 (RGD1310686), mRNA [NM_001008360]	NM_001008360	FALSE
A_43_P16589	0.0488032	0.00880324	-0.727528	-0.715957	-0.350597	-0.294867	-0.420696	CF110262	CF110262	Shultzomica03513 Rat lung airway and parenchyma cDNA libraries Rattus norvegicus cDNA clone Contig3105 5', mRNA sequence [CF110262]	CF110262	FALSE
A_43_P16731	0.00112213	0.000894379	-0.285329	-0.335154	-0.0583936	-0.33065	-1.43933	ENSRNOT00000002779	Ifngr2_predicted	PREDICTED: Rattus norvegicus interferon gamma receptor 2 (predicted) (Ifngr2_predicted), mRNA [XM_340967]		FALSE
A_43_P16750	0.000347663	0.000109113	0.100031	0.0874236	-0.0422609	-0.605866	-2.10665	XM_001058939	LOC680409	PREDICTED: Rattus norvegicus similar to Proline oxidase, mitochondrial precursor (Proline dehydrogenase), transcript variant 2 (LOC680409), mRNA [XM_001058939]	XM_001058939	FALSE
A_43_P16810	0.000381186	0.000132031	-0.0866461	-0.278946	0.0729337	-0.164696	-1.63306	CB546156	CB546156	CB546156 AMGNNUC:NRDG1-00197-D4-A nrdg1 (10855) Rattus norvegicus cDNA clone nrdg1-00197-d4 5', mRNA sequence [CB546156]	CB546156	FALSE
A_43_P17260	6.22124e-05	5.90844e-06	0.718477	0.500994	0.298378	-0.198518	-2.86273	NM_001014172	Rsrc1	Rattus norvegicus arginine/serine-rich coiled-coil 1 (Rsrc1), mRNA [NM_001014172]	NM_001014172	FALSE
A_44_P1007933	0.00024557	5.5374e-05	-0.0949163	-0.116853	-0.310165	-0.734243	-2.11647	NM_001044294	MGC125167	Rattus norvegicus similar to gamma-aminobutyric acid (GABA(A)) receptor-associated protein-like 1 (MGC125167), mRNA [NM_001044294]	NM_001044294	FALSE
A_44_P1008463	0.000970713	0.000680224	0.694585	0.539675	0.339192	0.0545918	-2.14533	XM_233144	RGD1311849_predicted	PREDICTED: Rattus norvegicus similar to mKIAA1797 protein (predicted) (RGD1311849_predicted), mRNA [XM_233144]	XM_233144	FALSE
A_44_P1008950	7.48886e-05	8.38263e-06	-0.91293	-0.883711	-0.294435	0.295205	2.29793	NM_001013880	LOC290651	Rattus norvegicus similar to myo-inositol 1-phosphate synthase A1 (LOC290651), mRNA [NM_001013880]	NM_001013880	FALSE
A_44_P1009594	0.0155024	0.0148095	-0.278434	-0.795495	0.172691	-0.339567	2.30997	NM_001024232	Cyp3a62	Rattus norvegicus cytochrome P450, subfamily 3A, polypeptide 62 (Cyp3a62), mRNA [NM_001024232]	NM_001024232	FALSE
A_44_P1013314	0.0010931	0.000842725	-0.547865	-1.02431	0.0643255	-1.21741	-2.62214	ENSRNOT00000039263	G1p2_predicted	PREDICTED: Rattus norvegicus interferon, alpha-inducible protein (clone IFI-15K) (predicted) (G1p2_predicted), mRNA [XM_216605]		FALSE
A_44_P1018129	0.00105503	0.000795697	0.626648	-0.0551788	-0.193715	-0.828713	-1.42493	TC610213	TC610213			FALSE
A_44_P1020615	7.48886e-05	8.53993e-06	-0.0943841	-0.247746	0.0159732	-0.535906	-2.53964	ENSRNOT00000029990	Ifi44	PREDICTED: Rattus norvegicus interferon-induced protein 44 (Ifi44), mRNA [XM_227821]		FALSE
A_44_P1022458	0.00139651	0.00122321	-0.565865	-1.22323	-0.348998	-0.590541	2.32996	NM_001025675	Tubb6	Rattus norvegicus tubulin, beta 6 (Tubb6), mRNA [NM_001025675]	NM_001025675	FALSE
A_44_P1028132	0.00134621	0.00115067	-1.4054	-1.51159	-1.05815	-0.840666	0.532835	BF564888	BF564888	BF564888 UI-R-BU0-amz-g-01-0-UI.r1 UI-R-BU0 Rattus norvegicus cDNA clone UI-R-BU0-amz-g-01-0-UI 5', mRNA sequence [BF564888]	BF564888	FALSE
A_44_P1034417	0.00147382	0.00131738	0.192793	-0.093015	-0.141764	-0.315225	-1.27668	AB026288	Inpp5e	Rattus norvegicus mRNA for pharbin, partial cds [AB026288]	AB026288	FALSE
A_44_P1034439	4.28285e-05	3.56178e-06	0.493492	0.0122349	0.257429	-0.264113	-2.47706	NM_022177	Cxcl12	Rattus norvegicus chemokine (C-X-C motif) ligand 12 (Cxcl12), transcript variant 1, mRNA [NM_022177]	NM_022177	FALSE
A_44_P1037342	0.0011592	0.000951966	-0.274901	-0.479645	-1.23336	-2.38249	-3.17055	NM_147206	Cyp3a13	Rattus norvegicus cytochrome P450, family 3, subfamily a, polypeptide 13 (Cyp3a13), mRNA [NM_147206]	NM_147206	FALSE
A_44_P1038028	0.000298983	8.68555e-05	-0.85839	-1.26219	-0.802922	-0.850419	1.79846	NM_181086	Tnfrsf12a	Rattus norvegicus tumor necrosis factor receptor superfamily, member 12a (Tnfrsf12a), mRNA [NM_181086]	NM_181086	FALSE
A_44_P1038341	0.000945779	0.000639326	-0.139849	-0.401775	0.0340202	-0.547052	-1.88229	NM_017159	Hal	Rattus norvegicus histidine ammonia lyase (Hal), mRNA [NM_017159]	NM_017159	FALSE
A_44_P1039205	1.93142e-05	9.62764e-07	0.561042	0.353865	0.475424	0.15795	-3.53121	M23721	M23721	RATCPA208 Rat carboxypeptidase (CA2) gene, exon 11 [M23721]	M23721	FALSE
A_44_P1039213	2.03179e-05	1.42861e-06	0.53525	0.333724	0.376858	-0.118256	-3.40541	NM_001013083	Cpa2_predicted	Rattus norvegicus carboxypeptidase A2 (pancreatic) (predicted) (Cpa2_predicted), mRNA [NM_001013083]	NM_001013083	FALSE
A_44_P1045105	0.00113615	0.000920344	-0.307474	-0.522724	0.116429	-0.487428	-2.30227	XM_218427	XM_218427	Rattus norvegicus similar to poliovirus receptor homolog (LOC308417), mRNA [XM_218427]	XM_218427	FALSE
A_44_P104652	1.03959e-05	3.03777e-07	-0.430469	-0.655384	-0.338558	-0.44488	2.85526	NM_181090	Slc38a2	Rattus norvegicus solute carrier family 38, member 2 (Slc38a2), mRNA [NM_181090]	NM_181090	FALSE
A_44_P1054453	0.000348395	0.000114834	0.119516	-0.294269	-0.0402905	-0.506672	-1.44341	ENSRNOT00000017373	Uap1l1_predicted	PREDICTED: Rattus norvegicus UDP-N-acteylglucosamine pyrophosphorylase 1-like 1 (predicted) (Uap1l1_predicted), mRNA [XM_216004]		FALSE
A_44_P1059122	0.000464134	0.000184098	-0.573198	-0.56205	-0.359249	-0.336393	1.36987	NM_001025683	RGD1311946	Rattus norvegicus similar to RIKEN cDNA 1810055G02 (RGD1311946), mRNA [NM_001025683]	NM_001025683	FALSE
A_44_P1060362	0.0126065	0.0119726	-0.317596	-0.850482	-0.0883969	-0.733213	-2.43025	NM_199391	RGD735112	Rattus norvegicus similar to RIKEN cDNA 5830404H04 (RGD735112), mRNA [NM_199391]	NM_199391	FALSE
A_44_P114732	0.000163825	2.92872e-05	-0.628116	-0.793122	-0.508608	-0.125121	1.667	TC597807	TC597807	Q3AW45_SYNS9 (Q3AW45) Elongator protein 3/MiaB/NifB, partial (3%) [TC597807]		FALSE
A_44_P122777	0.000397395	0.000149363	0.629276	0.392652	0.176847	0.183672	-1.73439	AI170696	AI170696	AI170696 EST216632 Normalized rat muscle, Bento Soares Rattus sp. cDNA clone RMUBA11 3' end, mRNA sequence [AI170696]	AI170696	FALSE
A_44_P123788	0.00124999	0.00105446	-0.562723	-0.435876	-0.161518	-0.151618	0.782163	XM_001056818	LOC293589	PREDICTED: Rattus norvegicus putative GTP-binding protein, transcript variant 1 (LOC293589), mRNA [XM_001056818]	XM_001056818	FALSE
A_44_P128201	0.0013575	0.0011679	-0.974627	-0.493693	0.704064	-0.0739887	1.30735	U25282	U25282	Rattus norvegicus brush border myosin I (BBMI) mRNA, alternatively spliced testis-specific variant, partial cds. [U25282]	U25282	FALSE
A_44_P132610	0.00086036	0.00054804	-0.90857	-0.515412	-0.448601	-0.583815	1.16857	NM_031148	Slc20a1	Rattus norvegicus solute carrier family 20 (phosphate transporter), member 1 (Slc20a1), mRNA [NM_031148]	NM_031148	FALSE
A_44_P132614	0.0029708	0.00277164	-0.830071	-0.703916	-0.236813	-0.672948	1.28514	NM_031148	Slc20a1	Rattus norvegicus solute carrier family 20 (phosphate transporter), member 1 (Slc20a1), mRNA [NM_031148]	NM_031148	FALSE
A_44_P139697	0.00151621	0.00138915	0.286679	-0.0901305	0.293515	0.0665556	-2.9469	NM_012508	Atp2b2	Rattus norvegicus ATPase, Ca++ transporting, plasma membrane 2 (Atp2b2), mRNA [NM_012508]	NM_012508	FALSE
A_44_P149847	0.000453085	0.000177184	-0.142023	-0.297987	0.420525	0.050359	-1.81928	NM_001014060	LOC312831	Rattus norvegicus similar to SRY (sex determining region Y)-box 5 isoform a (LOC312831), mRNA [NM_001014060]	NM_001014060	FALSE
A_44_P150017	0.000695909	0.000375349	-0.281137	-0.646307	-0.313654	-0.737673	-2.50595	TC582911	TC582911	Q5U432_MOUSE (Q5U432) CDNA sequence BC085284, partial (30%) [TC582911]		FALSE
A_44_P152237	0.000299953	8.88128e-05	-1.12782	-1.76607	-0.858481	-0.997548	0.879921	NM_001025022	RGD1308059	Rattus norvegicus similar to DNA segment, Chr 4, Brigham & Womens Genetics 0951 expressed (RGD1308059), mRNA [NM_001025022]	NM_001025022	FALSE
A_44_P155321	1.93142e-05	1.079e-06	0.409048	-0.0511814	0.00409305	-0.702981	-5.10669	M67496	M67496	RATKBP Rat kallikrein-binding protein (RKBP) gene [M67496]	M67496	FALSE
A_44_P158994	0.000109716	1.40976e-05	-0.195799	-0.930291	0.287195	-0.988912	4.57552	TC641315	TC641315	RATDBP2 vitamin D-binding protein precursor {Rattus norvegicus} (exp=-1; wgp=0; cg=0), partial (11%) [TC641315]		FALSE
A_44_P161052	0.000821173	0.000502783	-1.05043	-0.881207	-0.954476	-0.601645	-2.30722	NM_001040019	RGD1562373_predicted	Rattus norvegicus similar to 3-ketoacyl-CoA thiolase B, peroxisomal precursor (Beta-ketothiolase B) (predicted) (RGD1562373_predicted), mRNA [NM_001040019]	NM_001040019	FALSE
A_44_P165999	0.000144769	2.50717e-05	-0.406902	-0.155899	0.22844	-0.173629	-2.09452	NM_001013185	Cabc1	Rattus norvegicus chaperone, ABC1 activity of bc1 complex like (S. pombe) (Cabc1), mRNA [NM_001013185]	NM_001013185	FALSE
A_44_P169327	0.000339013	0.000104166	-0.0835381	-0.431936	0.144802	-0.231789	-1.92274	BC101897	LOC684538	Rattus norvegicus similar to enoyl Coenzyme A hydratase domain containing 3, mRNA (cDNA clone MGC:124810 IMAGE:7932594), complete cds [BC101897]	BC101897	FALSE
A_44_P171203	2.03179e-05	1.4756e-06	0.587935	0.620203	0.17859	-0.842977	-3.82692	ENSRNOT00000038074	Nubpl_predicted	PREDICTED: Rattus norvegicus nucleotide binding protein-like (predicted) (Nubpl_predicted), mRNA [XM_216689]		FALSE
A_44_P177058	0.000524689	0.000241615	-0.494348	-0.747365	-0.178017	-0.753108	-2.04353	ENSRNOT00000009491	Id2	DNA-binding protein inhibitor ID-2 (Inhibitor of DNA binding 2). [Source:Uniprot/SWISSPROT;Acc:P41137] [ENSRNOT00000009491]		FALSE
A_44_P178519	0.000764864	0.000435844	0.575631	0.243802	0.442925	-0.0439131	-2.22142	NM_001047101	Adamts7_predicted	Rattus norvegicus a disintegrin-like and metallopeptidase (reprolysin type) with thrombospondin type 1 motif, 7 (predicted) (Adamts7_predicted), mRNA [NM_001047101]	NM_001047101	FALSE
A_44_P179956	0.00308081	0.00289149	0.0900544	-0.348873	0.18665	-0.739584	-3.09411	AY321344	Igtp	Rattus norvegicus Ac2-233 mRNA, complete cds. [AY321344]	AY321344	FALSE
A_44_P182386	0.000627211	0.000304846	-0.509734	-0.580943	0.230323	0.348135	1.15759	ENSRNOT00000033705	ENSRNOT00000033705	LRRGT00019. [Source:Uniprot/SPTREMBL;Acc:Q6TXI0] [ENSRNOT00000033705]		FALSE
A_44_P184817	0.000878808	0.000576165	-0.661371	-0.822263	-0.24803	-0.567447	-2.40183	NM_080892	Selenbp1	Rattus norvegicus selenium binding protein 2 (Selenbp1), mRNA [NM_080892]	NM_080892	FALSE
A_44_P194939	0.00034775	0.000112679	-1.98609	-2.91875	-0.0325328	0.80656	-0.365655	BF548548	BF548548	UI-R-A0-at-g-04-0-UI.r1 UI-R-A0 Rattus norvegicus cDNA clone UI-R-A0-at-g-04-0-UI 5', mRNA sequence [BF548548]	BF548548	FALSE
A_44_P199187	7.48886e-05	8.78581e-06	0.501688	0.453334	0.294356	-1.21232	-5.06539	NM_001012353	MGC108823	Rattus norvegicus similar to interferon-inducible GTPase (MGC108823), mRNA [NM_001012353]	NM_001012353	FALSE
A_44_P203106	0.000204475	3.88388e-05	-0.89832	-1.40401	-1.27955	-1.47163	1.99617	NM_019242	Ifrd1	Rattus norvegicus interferon-related developmental regulator 1 (Ifrd1), mRNA [NM_019242]	NM_019242	FALSE
A_44_P208464	0.479534	0.0474176	-1.05951	-1.10312	-1.09914	-0.786525	0.0763113	NM_001024778	Rad17	Rattus norvegicus RAD17 homolog (S. pombe) (Rad17), mRNA [NM_001024778]	NM_001024778	FALSE
A_44_P215880	0.000144769	2.42822e-05	-0.141161	-0.25958	0.274911	-0.0812769	-1.8117	ENSRNOT00000005039	Rilp_predicted	PREDICTED: Rattus norvegicus Rab interacting lysosomal protein (predicted) (Rilp_predicted), mRNA [XM_213380]		FALSE
A_44_P221885	0.000112023	1.56456e-05	-0.937604	-0.813162	-1.09581	-0.936394	1.07399	BF565038	BF565038	BF565038 UI-R-BU0-ams-a-01-0-UI.r1 UI-R-BU0 Rattus norvegicus cDNA clone UI-R-BU0-ams-a-01-0-UI 5', mRNA sequence [BF565038]	BF565038	FALSE
A_44_P222710	0.000855147	0.000539841	0.322791	0.0480107	-0.118182	-0.460966	-1.42759	XM_001054666	LOC679693	PREDICTED: Rattus norvegicus similar to Mediator of RNA polymerase II transcription subunit 12 (Thyroid hormone receptor-associated protein complex 230 kDa component) (Trap230) (Activator-recruited cofactor 240 kDa component) (ARC240) (CAG repeat pro...	XM_001054666	FALSE
A_44_P228942	0.00139651	0.00122487	-0.268369	-0.108228	0.591876	-0.530442	1.35415	NM_017325	Runx1	Rattus norvegicus runt related transcription factor 1 (Runx1), mRNA [NM_017325]	NM_017325	FALSE
A_44_P233080	0.0348218	0.0338491	-1.97284	-2.21277	-1.57765	0.202996	1.03792	NM_012551	Egr1	Rattus norvegicus early growth response 1 (Egr1), mRNA [NM_012551]	NM_012551	FALSE
A_44_P234315	7.48886e-05	7.65401e-06	0.391668	0.377831	0.265758	0.0473281	-2.62864	BF289587	BF289587	BF289587 EST454178 Rat Gene Index, normalized rat, Rattus norvegicus cDNA Rattus norvegicus cDNA clone RGIHI76, mRNA sequence [BF289587]	BF289587	FALSE
A_44_P247568	0.000508611	0.000227312	-0.835192	-1.31925	-0.106549	-0.0815717	1.04099	AA849222	AA849222	AA849222 EST191989 Normalized rat muscle, Bento Soares Rattus sp. cDNA clone RMUAC59 5' end, mRNA sequence [AA849222]	AA849222	FALSE
A_44_P248644	0.0480974	0.00805216	-0.6555	-0.875512	-0.969514	-0.918439	-0.263432	ENSRNOT00000003284	RGD1562597_predicted	PREDICTED: Rattus norvegicus similar to expressed sequence AA415817 (predicted) (RGD1562597_predicted), mRNA [XM_222536]		FALSE
A_44_P250028	0.0016601	0.00153026	-0.00644529	-0.394309	0.237439	0.0372717	-2.65168	NM_138912	Ppp1r3b	Rattus norvegicus protein phosphatase 1, regulatory (inhibitor) subunit 3B (Ppp1r3b), mRNA [NM_138912]	NM_138912	FALSE
A_44_P253208	0.000112023	1.51017e-05	1.07763	0.302779	0.983025	0.698784	-1.93577	XM_232202	Adamts9_predicted	Rattus norvegicus similar to a disintegrin-like and metalloprotease with thrombospondin type 1 motifs 9B (LOC312566), mRNA [XM_232202]	XM_232202	FALSE
A_44_P262064	0.000501318	0.000209502	0.050786	-0.0361269	0.0868077	-0.928779	-2.79921	NM_182474	LOC299282	Rattus norvegicus Serine protease inhibitor (LOC299282), mRNA [NM_182474]	NM_182474	FALSE
A_44_P262065	0.000397395	0.000150966	0.00168562	0.0219069	-0.0325243	-0.726221	-2.67269	NM_182474	LOC299282	Rattus norvegicus Serine protease inhibitor (LOC299282), mRNA [NM_182474]	NM_182474	FALSE
A_44_P266955	0.0015004	0.00136629	-0.112443	-0.311263	-0.0544877	-0.344841	-2.06349	NM_017004	Es2	Rattus norvegicus esterase 2 (Es2), mRNA [NM_017004]	NM_017004	FALSE
A_44_P271018	0.000524689	0.00024274	-0.749202	-0.809684	-0.108632	0.0338099	0.663945	BG668512	BG668512	BG668512 DRACKA02 Rat DRG Library Rattus norvegicus cDNA clone DRACKA02 5', mRNA sequence [BG668512]	BG668512	FALSE
A_44_P281482	0.000690348	0.000358673	1.07531	0.673616	-0.627955	-1.04845	-2.34207	XM_216212	Chchd6_predicted	PREDICTED: Rattus norvegicus coiled-coil-helix-coiled-coil-helix domain containing 6 (predicted) (Chchd6_predicted), mRNA [XM_216212]	XM_216212	FALSE
A_44_P283508	0.000166997	3.07871e-05	-0.0808285	0.500346	-0.0984329	-1.16424	-3.77895	NM_012792	Fmo1	Rattus norvegicus flavin containing monooxygenase 1 (Fmo1), mRNA [NM_012792]	NM_012792	FALSE
A_44_P287301	0.00100038	0.000721754	-0.262714	-0.594253	-0.566238	-0.836446	1.74924	ENSRNOT00000002522	Bcl6_predicted	PREDICTED: Rattus norvegicus B-cell leukemia [XM_221333]		FALSE
A_44_P288291	0.000797105	0.000467575	-1.60772	-2.22092	-1.86245	-2.22908	-0.422279	NM_001012206	Phlda3	Rattus norvegicus pleckstrin homology-like domain, family A, member 3 (Phlda3), mRNA [NM_001012206]	NM_001012206	FALSE
A_44_P291028	0.000821173	0.000504631	0.245894	-0.106877	0.192162	0.160135	-3.44139	ENSRNOT00000036739	Arhgef19_predicted	PREDICTED: Rattus norvegicus Rho guanine nucleotide exchange factor (GEF) 19 (predicted) (Arhgef19_predicted), mRNA [XM_342965]		FALSE
A_44_P291552	0.000347663	0.000110708	-0.695825	-0.38541	-0.928478	-0.896899	1.68315	ENSRNOT00000019080	RGD1310174_predicted	PREDICTED: Rattus norvegicus hypothetical LOC298504 (predicted) (RGD1310174_predicted), mRNA [XM_216525]		FALSE
A_44_P312089	0.000673993	0.00034641	-0.133821	-0.603207	-0.350182	-0.553502	0.609144	NM_001014100	LOC316326	Rattus norvegicus similar to lung inducible neuralized-related C3HC4 RING finger protein (LOC316326), mRNA [NM_001014100]	NM_001014100	FALSE
A_44_P316490	0.000288439	8.2181e-05	-0.0630345	-0.173041	0.262298	0.180627	-2.35052	ENSRNOT00000019993	RGD1311612_predicted	PREDICTED: Rattus norvegicus similar to hypothetical protein FLJ12118 (predicted) (RGD1311612_predicted), mRNA [XM_001076059]		FALSE
A_44_P324482	1.93142e-05	1.02351e-06	2.04624	2.27989	0.575681	-0.58254	-1.88634	NM_001025762	Smyd3	Rattus norvegicus SET and MYND domain containing 3 (Smyd3), mRNA [NM_001025762]	NM_001025762	FALSE
A_44_P325285	0.000556048	0.000260939	0.463641	-0.206276	0.609947	0.470701	-2.35863	NM_001012122	Ecgf1	Rattus norvegicus endothelial cell growth factor 1 (platelet-derived) (Ecgf1), mRNA [NM_001012122]	NM_001012122	FALSE
A_44_P328256	0.000645314	0.000320854	0.461482	-0.0539855	0.43557	-0.350104	-1.95498	ENSRNOT00000043650	Nalp12_predicted	PREDICTED: Rattus norvegicus NACHT, leucine rich repeat and PYD containing 12 (predicted) (Nalp12_predicted), mRNA [XM_218181]		FALSE
A_44_P337740	0.000144769	2.40521e-05	0.427067	0.480284	0.75492	0.0639809	-2.38419	NM_001013139	Fars2	Rattus norvegicus phenylalanine-tRNA synthetase 2 (mitochondrial) (Fars2), mRNA [NM_001013139]	NM_001013139	FALSE
A_44_P360510	0.00104339	0.000775254	0.596585	0.838315	0.447851	-0.487712	-2.31193	NM_030850	Bhmt	Rattus norvegicus betaine-homocysteine methyltransferase (Bhmt), mRNA [NM_030850]	NM_030850	FALSE
A_44_P370267	0.000123596	1.79526e-05	-0.0105356	-0.0443019	0.0745243	-0.400468	-2.92618	ENSRNOT00000027075	Ethe1_predicted	PREDICTED: Rattus norvegicus ethylmalonic encephalopathy 1 (predicted) (Ethe1_predicted), mRNA [XM_214838]		FALSE
A_44_P388973	0.00104339	0.000766287	-0.641974	-0.455826	-0.522194	-0.828289	1.97448	NM_012571	Got1	Rattus norvegicus glutamate oxaloacetate transaminase 1 (Got1), mRNA [NM_012571]	NM_012571	FALSE
A_44_P398142	0.000227803	4.45425e-05	-0.425923	-0.638499	-0.175825	-0.277417	2.34245	NM_017259	Btg2	Rattus norvegicus B-cell translocation gene 2, anti-proliferative (Btg2), mRNA [NM_017259]	NM_017259	FALSE
A_44_P400147	0.048593	0.0379462	-1.01158	-0.817998	-0.0195028	-0.625205	-1.22093	NM_031552	Add3	Rattus norvegicus adducin 3 (gamma) (Add3), mRNA [NM_031552]	NM_031552	FALSE
A_44_P402375	0.000473209	0.000190341	-2.38793	-2.33064	-1.29941	-1.72847	0.218036	NM_031576	Por	Rattus norvegicus P450 (cytochrome) oxidoreductase (Por), mRNA [NM_031576]	NM_031576	FALSE
A_44_P410000	0.0473645	0.0124518	-0.458001	-0.435369	-0.991833	-0.921968	0.695631	NM_001012151	Stx18	Rattus norvegicus syntaxin 18 (Stx18), mRNA [NM_001012151]	NM_001012151	FALSE
A_44_P412140	0.00100038	0.000723382	-0.070168	0.0212328	-0.166828	-1.19592	-3.05328	NM_182474	LOC299282	Rattus norvegicus Serine protease inhibitor (LOC299282), mRNA [NM_182474]	NM_182474	FALSE
A_44_P426541	0.00112213	0.00090103	0.0241081	-0.353674	-0.12387	-0.485708	-1.93774	NM_001012032	Arhgap24	Rattus norvegicus Rho GTPase activating protein 24 (Arhgap24), mRNA [NM_001012032]	NM_001012032	FALSE
A_44_P433771	0.000640405	0.000314836	-0.598612	-0.568913	-0.159588	-0.171313	0.866838	ENSRNOT00000027345	Reep5_predicted	PREDICTED: Rattus norvegicus receptor accessory protein 5 (predicted) (Reep5_predicted), mRNA [XM_344661]		FALSE
A_44_P436123	0.000262914	6.84122e-05	-0.272093	-0.214114	0.405074	-0.281119	-2.92495	NM_001017466	MGC108776	Rattus norvegicus Snf7 homologue associated with Alix 3 (MGC108776), mRNA [NM_001017466]	NM_001017466	FALSE
A_44_P438758	0.0175723	0.0168852	-0.137462	0.479847	-0.373424	-1.99452	-2.97055	ENSRNOT00000044152	ENSRNOT00000044152	similar to BC049975 protein (predicted) (RGD1565462_predicted), mRNA [Source:RefSeq_dna;Acc:XR_008461] [ENSRNOT00000044152]		FALSE
A_44_P454420	0.000504072	0.000216836	0.0641698	-0.149862	0.243196	-0.730203	-1.97435	AF029241	RT1-S3	Rattus norvegicus MHC class Ib RT1.S3 (RT1.S3) mRNA, partial cds [AF029241]	AF029241	FALSE
A_44_P468468	0.000855147	0.000535873	-0.914847	-0.709603	0.0273117	-0.0486866	2.57665	NM_017208	Lbp	Rattus norvegicus lipopolysaccharide binding protein (Lbp), mRNA [NM_017208]	NM_017208	FALSE
A_44_P476936	0.000821173	0.000492764	-0.746683	-0.901035	-0.235963	-0.394734	0.822508	X62295	X62295	RRVT1AIIR R.rattus mRNA for vascular type-1 angiotensin II receptor [X62295]	X62295	FALSE
A_44_P480771	0.00122753	0.00101621	-0.665482	-0.708658	-0.376559	-0.814321	0.499328	ENSRNOT00000012419	Hivep3_predicted	PREDICTED: Rattus norvegicus human immunodeficiency virus type I enhancer binding protein 3 (predicted) (Hivep3_predicted), mRNA [XM_233464]		FALSE
A_44_P487300	0.00123558	0.0010354	-0.62516	-0.450402	0.16306	0.285442	1.17594	A_44_P487300	A_44_P487300			FALSE
A_44_P487418	0.000961604	0.000660767	-0.227036	-0.786494	-0.286602	-0.784425	-2.77311	XM_341976	XM_341976	Rattus norvegicus similar to S-CaBP2 (LOC361693), mRNA [XM_341976]	XM_341976	FALSE
A_44_P487876	0.000397395	0.00014638	-0.245937	-0.167435	-0.0879865	-0.242669	-1.59444	NM_001008361	Rnf167	Rattus norvegicus ring finger protein 167 (Rnf167), mRNA [NM_001008361]	NM_001008361	FALSE
A_44_P493911	8.15916e-05	1.0028e-05	0.0573568	-0.140789	0.14926	-0.268788	3.10594	NM_170668	Slc13a5	Rattus norvegicus solute carrier family 13 (sodium-dependent citrate transporter), member 5 (Slc13a5), mRNA [NM_170668]	NM_170668	FALSE
A_44_P503552	0.000870988	0.000564439	-0.354951	-0.456455	0.152854	-0.0353832	-2.00627	NM_139337	Lrp16	Rattus norvegicus LRP16 protein (Lrp16), mRNA [NM_139337]	NM_139337	FALSE
A_44_P507448	0.000878808	0.000579326	-0.574373	-0.616368	-1.01288	-1.64652	3.02775	NM_001009671	RGD1359509	Rattus norvegicus similar to hypothetical protein FLJ13448 (RGD1359509), mRNA [NM_001009671]	NM_001009671	FALSE
A_44_P512874	0.00142928	0.00126959	0.286689	0.42021	-0.199615	-1.00872	-2.94264	NM_017074	Cth	Rattus norvegicus cystathionase (cystathionine gamma-lyase) (Cth), mRNA [NM_017074]	NM_017074	FALSE
A_44_P515484	0.000713178	0.000390455	-0.912026	-0.757165	-1.38998	-1.83233	1.10217	NM_012668	Tat	Rattus norvegicus tyrosine aminotransferase (Tat), mRNA [NM_012668]	NM_012668	FALSE
A_44_P517258	0.000764864	0.000429402	-0.859321	-1.39164	-1.99425	-1.2564	0.325001	NM_198780	Pck1	Rattus norvegicus phosphoenolpyruvate carboxykinase 1 (Pck1), mRNA [NM_198780]	NM_198780	FALSE
A_44_P521587	0.000556435	0.000264229	0.092924	0.0128385	0.374637	-0.379626	-2.36855	XM_224588	Arhgef3_predicted	PREDICTED: Rattus norvegicus Rho guanine nucleotide exchange factor (GEF) 3 (predicted) (Arhgef3_predicted), mRNA [XM_224588]	XM_224588	FALSE
A_44_P536708	0.00024557	5.46464e-05	-0.0506895	-0.398444	0.0824367	-0.297994	-1.66166	XM_214409	XM_214409	Rattus norvegicus similar to cDNA sequence BC011426 (LOC290964), mRNA [XM_214409]	XM_214409	FALSE
A_44_P538334	0.000608913	0.00029255	0.0370942	-0.170533	-0.22153	-0.584759	-2.01798	NM_172224	Impa2	Rattus norvegicus inositol (myo)-1(or 4)-monophosphatase 2 (Impa2), mRNA [NM_172224]	NM_172224	FALSE
A_44_P541213	2.02138e-05	1.24219e-06	1.40924	1.02325	0.621134	-1.4131	-3.55044	XM_001059639	LOC681383	PREDICTED: Rattus norvegicus similar to Protein C10orf11 homolog (LOC681383), mRNA [XM_001059639]	XM_001059639	FALSE
A_44_P545193	4.28285e-05	3.58898e-06	0.0603846	-0.41386	-0.0487462	-0.775307	-3.60054	NM_017081	Hsd11b2	Rattus norvegicus hydroxysteroid 11-beta dehydrogenase 2 (Hsd11b2), mRNA [NM_017081]	NM_017081	FALSE
A_44_P550738	1.03959e-05	3.48464e-07	0.328303	0.0183461	0.538711	0.217463	-2.53564	NM_001014172	Rsrc1	Rattus norvegicus arginine/serine-rich coiled-coil 1 (Rsrc1), mRNA [NM_001014172]	NM_001014172	FALSE
A_44_P551842	0.000970713	0.000683295	-0.028891	-0.18822	0.060075	-0.241364	-1.52038	NM_134403	Abtb2	Rattus norvegicus ankyrin repeat and BTB (POZ) domain containing 2 (Abtb2), mRNA [NM_134403]	NM_134403	FALSE
A_44_P555689	0.000919797	0.000611485	-0.296925	-0.118546	-0.172517	-1.22914	-3.1518	NM_001013889	LOC291863	Rattus norvegicus carboxylesterase-like (LOC291863), mRNA [NM_001013889]	NM_001013889	FALSE
A_44_P588937	0.00111471	0.000865616	0.363203	-0.201375	0.246014	-0.188756	-2.08229	AW142896	AW142896	AW142896 EST293187 Normalized rat placenta, Bento Soares Rattus sp. cDNA clone RGIAZ08 5' end, mRNA sequence [AW142896]	AW142896	FALSE
A_44_P593422	0.0014113	0.00124573	-0.685696	-0.794679	-0.507162	-1.04972	0.673886	TC609292	TC609292			FALSE
A_44_P603871	0.00115731	0.000943953	-0.281531	-0.247671	-0.212024	-0.747739	-1.72657	AW914028	AW914028	AW914028 EST294806 Rat gene index, normalized rat, norvegicus, Bento Soares Rattus norvegicus cDNA clone RGIZB25 5' end, mRNA sequence [AW914028]	AW914028	FALSE
A_44_P606441	0.000695909	0.000376086	-0.298141	-0.235231	-0.115748	-0.36903	-2.03648	TC576288	TC576288	Q8R491_RAT (Q8R491) EH-domain containing protein 2, complete [TC576288]		FALSE
A_44_P640131	0.000397395	0.000142506	-0.407914	-1.08351	-0.158751	-0.154229	1.16892	TC621874	TC621874	THAP2_MOUSE (Q9D305) THAP domain-containing protein 2, partial (12%) [TC621874]		FALSE
A_44_P745478	0.000821173	0.000497955	-0.148089	-0.433633	0.0586633	-0.232769	-1.88611	A_44_P745478	A_44_P745478			FALSE
A_44_P762376	0.0010931	0.000842195	0.0732664	-0.160409	-0.276901	-0.589827	-1.82668	DV727084	DV727084	RVL19520 Wackym-Soares normalized rat vestibular cDNA library Rattus norvegicus cDNA 5', mRNA sequence [DV727084]	DV727084	FALSE
A_44_P805040	0.000508535	0.000221596	0.0551869	-0.0334799	-0.0929805	-0.535774	-1.9608	XM_219201	Ppfibp2	PREDICTED: Rattus norvegicus protein tyrosine phosphatase, receptor-type, F interacting protein, binding protein 2 (Ppfibp2), mRNA [XM_219201]	XM_219201	FALSE
A_44_P806840	0.00108811	0.000826718	-0.178031	-0.236473	0.0856437	-0.298276	-1.92061	NM_001013175	Apol3	Rattus norvegicus apolipoprotein L, 3 (Apol3), mRNA [NM_001013175]	NM_001013175	FALSE
A_44_P838368	0.00111532	0.000872318	-0.038179	-0.0487188	-0.270385	-0.502929	-1.28984	TC589670	TC589670			FALSE
A_44_P838992	0.000501318	0.000210049	-2.22641	-2.16728	-1.21862	-0.995725	0.117379	XM_001079372	LOC687609	PREDICTED: Rattus norvegicus similar to ras homolog gene family, member f (LOC687609), mRNA [XM_001079372]	XM_001079372	FALSE
A_44_P884739	0.000282469	7.7324e-05	-0.14022	-0.350606	0.382566	-0.0529832	-1.31154	ENSRNOT00000037405	Sez6l2_predicted	PREDICTED: Rattus norvegicus seizure related 6 homolog (mouse)-like 2 (predicted) (Sez6l2_predicted), mRNA [XM_219339]		FALSE
A_44_P899002	0.000387625	0.000136427	0.635092	-0.306596	0.36047	0.334804	-2.10235	TC595980	TC595980	Q67T27_SYMTH (Q67T27) RNA polymerase ECF-type sigma factor, partial (5%) [TC595980]		FALSE
A_44_P899810	0.000941205	0.000630976	-0.344776	-0.439303	-0.166657	-0.460304	-2.15777	XM_341853	Prrg2_predicted	PREDICTED: Rattus norvegicus proline-rich Gla (G-carboxyglutamic acid) polypeptide 2 (predicted) (Prrg2_predicted), mRNA [XM_341853]	XM_341853	FALSE
A_44_P901239	0.00201452	0.00186821	0.330236	0.487402	0.264679	-0.866706	-1.73754	TC603455	TC603455	Q6DEP5_XENTR (Q6DEP5) MGC89973 protein (Ribosomal protein S11), partial (6%) [TC603455]		FALSE
A_44_P914438	0.00100038	0.000726532	-1.67648	-1.5975	-0.762833	-1.12887	0.527764	NM_080782	Cdkn1a	Rattus norvegicus cyclin-dependent kinase inhibitor 1A (Cdkn1a), mRNA [NM_080782]	NM_080782	FALSE
A_44_P986010	0.000397395	0.000149108	-0.243013	-0.562372	-0.55513	-0.962794	1.53442	CF108537	CF108537	Shultzomica01788 Rat lung airway and parenchyma cDNA libraries Rattus norvegicus cDNA clone Contig1457 5', mRNA sequence [CF108537]	CF108537	FALSE
