# Supplementary material for: Analysis of Common and Specific Mechanisms of Liver Function Affected by Nitrotoluene Compounds
Source: PLoS One. 2011 Feb 8;6(2):e14662. doi: 10.1371/journal.pone.0014662 (PMC3035612; doi:10.1371/journal.pone.0014662)
Supplement: Table S3 — A table (supplementary table 3) providing a list of genes that were significantly regulated by 2,6DNT at 24 h. (0.44 MB XLSX) [file pone.0014662.s003.xlsx]

## Sheet: 26DNT24h
Supplementary table 3 Significantly regulated genes by 2,6DNT at 24h
ProbeName	Corrected p-value	p-value	["RatL2,6DNT24h_C"](normalized)	["RatL2,6DNT24h_5"](normalized)	["RatL2,6DNT24h_25"](normalized)	["RatL2,6DNT24h_50"](normalized)	["RatL2,6DNT24h_99"](normalized)	Common name	GeneSymbol	Description	GenbankAccession	ControlType
A_44_P330643	0.0353997	0.00376722	-0.282651	-0.0503966	0.157798	0.336969	0.834307	ENSRNOT00000039252	Polr2b_predicted	PREDICTED: Rattus norvegicus polymerase (RNA) II (DNA directed) polypeptide B (predicted) (Polr2b_predicted), mRNA [XM_214021]		FALSE
A_44_P154298	0.0498162	0.00689595	-0.0550045	0.668123	0.470704	0.324816	-0.2343	XM_573787	RGD1565970_predicted	PREDICTED: Rattus norvegicus similar to mast cell protease 8 (predicted) (RGD1565970_predicted), mRNA [XM_573787]	XM_573787	FALSE
A_44_P468468	0.0149217	0.000786736	0.405904	0.0993894	0.0716324	-0.125061	-1.225	NM_017208	Lbp	Rattus norvegicus lipopolysaccharide binding protein (Lbp), mRNA [NM_017208]	NM_017208	FALSE
A_44_P508845	0.00750513	0.000178226	0.146986	-0.0145613	0.344939	0.497287	0.829073	ENSRNOT00000031768	ENSRNOT00000031768	similar to Sepiapterin reductase (SPR) (predicted) (RGD1560795_predicted), mRNA [Source:RefSeq_dna;Acc:XR_008912] [ENSRNOT00000031768]		FALSE
A_44_P141963	0.00171657	2.65652e-06	0.36195	0.594569	0.259579	-0.365573	-2.2056	NM_001013177	Sult1c2a	Rattus norvegicus sulfotransferase family, cytosolic, 1C, member 2a (Sult1c2a), mRNA [NM_001013177]	NM_001013177	FALSE
A_44_P142111	0.0082734	0.000230025	-0.167574	-0.121564	-0.181852	-0.659336	-2.19014	ENSRNOT00000015724	Ces5	Carboxylesterase precursor (EC 3.1.1.1) (Fragment). [Source:Uniprot/SPTREMBL;Acc:O35535] [ENSRNOT00000015724]		FALSE
A_44_P175495	0.0446138	0.00573653	0.169707	0.840475	0.821303	0.576638	-0.394917	NM_182952	Cxcl11	Rattus norvegicus chemokine (C-X-C motif) ligand 11 (Cxcl11), mRNA [NM_182952]	NM_182952	FALSE
A_44_P499166	0.00151364	1.35375e-06	0.0453327	0.100009	-0.258278	-0.889283	-1.84298	ENSRNOT00000015625	Mtmr7_predicted	PREDICTED: Rattus norvegicus myotubularin related protein 7 (predicted) (Mtmr7_predicted), mRNA [XM_240417]		FALSE
A_44_P274976	0.0024089	7.16489e-06	0.201444	0.121912	-0.146535	-0.796052	-2.18901	DV717216	DV717216	RVL7682 Wackym-Soares normalized rat vestibular cDNA library Rattus norvegicus cDNA 5', mRNA sequence [DV717216]	DV717216	FALSE
A_44_P960266	0.00872622	0.000254687	-0.185242	0.213319	0.408848	1.06929	2.86931	XM_001080742	RGD1307493_predicted	PREDICTED: Rattus norvegicus similar to membrane protein expressed in epithelial-like lung adenocarcinoma (predicted) (RGD1307493_predicted), mRNA [XM_001080742]	XM_001080742	FALSE
A_44_P134186	0.0444956	0.00570115	-0.326092	-0.403744	-0.0919303	0.0825129	0.555901	NM_145678	Vps4a	Rattus norvegicus vacuolar protein sorting 4a (yeast) (Vps4a), mRNA [NM_145678]	NM_145678	FALSE
A_44_P246202	0.0347432	0.00364847	-0.218758	0.0751091	0.217407	0.537834	1.15687	XR_006625	LOC500703	PREDICTED: Rattus norvegicus similar to heterogeneous nuclear ribonucleoproteins methyltransferase-like 2 (LOC500703), mRNA [XR_006625]	XR_006625	FALSE
A_44_P641262	0.0492145	0.00676013	-0.347574	0.142792	-0.159608	0.449132	1.86282	NM_001024306	LOC499709	Rattus norvegicus similar to nucleolar protein family A, member 1 (LOC499709), mRNA [NM_001024306]	NM_001024306	FALSE
A_44_P148773	0.0259156	0.00217122	-0.167119	-0.0760894	0.174986	0.297237	0.462604	AI169077	AI169077	AI169077 EST214906 Normalized rat kidney, Bento Soares Rattus sp. cDNA clone RKIBM73 3' end, mRNA sequence [AI169077]	AI169077	FALSE
A_44_P592479	0.0498754	0.00691479	-0.887082	0.20028	0.3024	0.337212	0.465671	NM_022689	Snap23	Rattus norvegicus synaptosomal-associated protein 23 (Snap23), mRNA [NM_022689]	NM_022689	FALSE
A_42_P458530	0.0190312	0.00127254	-0.272833	0.547663	0.620204	1.00971	1.72065	NM_139342	Ripk3	Rattus norvegicus receptor-interacting serine-threonine kinase 3 (Ripk3), mRNA [NM_139342]	NM_139342	FALSE
A_44_P1017335	0.0111566	0.000435822	0.252484	0.0387372	0.601643	0.768586	1.12657	ENSRNOT00000010210	Cse1l_predicted	PREDICTED: Rattus norvegicus chromosome segregation 1-like (S. cerevisiae) (predicted) (Cse1l_predicted), mRNA [XM_342581]		FALSE
A_43_P12841	0.0168417	0.00099941	-0.110502	0.6079	0.374434	0.622421	-0.333558	NM_053535	Enpp1	Rattus norvegicus ectonucleotide pyrophosphatase/phosphodiesterase 1 (Enpp1), mRNA [NM_053535]	NM_053535	FALSE
A_44_P152335	0.0139139	0.000688308	-0.331796	-0.164184	0.262948	0.455637	0.763461	XR_009148	RGD1564023_predicted	PREDICTED: Rattus norvegicus similar to ribosomal protein S19 (predicted) (RGD1564023_predicted), mRNA [XR_009148]	XR_009148	FALSE
A_44_P1008463	0.00253917	1.06672e-05	0.189845	0.596729	0.208743	-0.302629	-1.94167	XM_233144	RGD1311849_predicted	PREDICTED: Rattus norvegicus similar to mKIAA1797 protein (predicted) (RGD1311849_predicted), mRNA [XM_233144]	XM_233144	FALSE
A_44_P652611	0.0279431	0.00250666	0.0454292	-0.799237	-0.00393474	0.19246	0.59377	TC574872	TC574872	ITB1_RAT (P49134) Integrin beta-1 precursor (Fibronectin receptor beta subunit) (Integrin VLA-4 beta subunit) (CD29 antigen), complete [TC574872]		FALSE
A_44_P173112	0.017681	0.00111163	-0.0973017	-0.684196	-0.519541	-0.628814	-1.10228	XM_341935	XM_341935	Rattus norvegicus similar to cDNA sequence BC017158 (LOC361654), mRNA [XM_341935]	XM_341935	FALSE
A_44_P591224	0.016636	0.000973	-0.206289	-0.443553	0.183705	0.640645	1.05218	TC601898	TC601898	Q7TQ12_RAT (Q7TQ12) Aa1114, partial (9%) [TC601898]		FALSE
A_43_P22276	0.019053	0.00128025	0.594414	-0.250376	0.0803553	-0.181506	-0.861558	CB547510	CB547510	AMGNNUC:TRBA2-00006-D1-A trba2 (10286) Rattus norvegicus cDNA clone trba2-00006-d1 5', mRNA sequence [CB547510]	CB547510	FALSE
A_44_P525827	0.0238815	0.0019091	-0.426488	-0.172549	0.385407	0.772052	0.887268	NM_199091	Cct3	Rattus norvegicus chaperonin subunit 3 (gamma) (Cct3), mRNA [NM_199091]	NM_199091	FALSE
A_44_P134865	0.0163386	0.000946596	-0.169857	0.070213	0.297534	0.372459	0.733866	ENSRNOT00000016325	RGD1309198_predicted	PREDICTED: Rattus norvegicus similar to U5 snRNP-specific protein (Prp8-binding) (predicted) (RGD1309198_predicted), mRNA [XR_008002]		FALSE
A_44_P1024656	0.0264919	0.00228704	0.146767	-0.483729	0.265114	0.518386	1.20264	AW141270	AW141270	EST291311 Normalized rat brain, Bento Soares Rattus sp. cDNA clone RGIBJ89 5' end similar to histone H2A, mRNA sequence [AW141270]	AW141270	FALSE
A_44_P397460	0.0136958	0.000670941	-0.0409378	-0.405664	0.695687	0.977713	1.49623	XM_001055813	LOC680122	PREDICTED: Rattus norvegicus similar to sin3 associated polypeptide (LOC680122), mRNA [XM_001055813]	XM_001055813	FALSE
A_44_P654666	0.0161408	0.000902695	0.555613	0.44532	0.424885	-0.241749	-0.821643	TC621684	TC621684			FALSE
A_44_P844244	0.038381	0.00436879	0.378412	0.382623	0.381599	0.772544	1.58852	TC608653	TC608653			FALSE
A_44_P576228	0.032286	0.00328391	0.223686	0.482835	0.788568	1.03944	1.38594	ENSRNOT00000058639	Orc2l	origin recognition complex, subunit 2-like [Source:RefSeq_peptide;Acc:NP_001012003] [ENSRNOT00000058639]		FALSE
A_43_P13043	0.0149746	0.000797517	1.32495	0.915233	0.685872	0.588681	-0.412579	NM_057137	Ebp	Rattus norvegicus phenylalkylamine Ca2+ antagonist (emopamil) binding protein (Ebp), mRNA [NM_057137]	NM_057137	FALSE
A_44_P424116	0.0210575	0.00151161	0.277455	-0.463176	-0.543497	-0.780252	-1.7006	NM_001024751	Sox6	Rattus norvegicus SRY-box containing gene 6 (Sox6), mRNA [NM_001024751]	NM_001024751	FALSE
A_42_P813939	0.00624398	0.00012462	-0.0670515	0.122764	0.453213	0.586021	0.897506	XM_343190	RGD1563028_predicted	PREDICTED: Rattus norvegicus similar to DIP13 beta (predicted) (RGD1563028_predicted), mRNA [XM_343190]	XM_343190	FALSE
A_44_P161674	0.0349862	0.00369112	-0.113895	0.177409	0.782943	1.0886	1.12855	ENSRNOT00000007470	RGD1561150_predicted	PREDICTED: Rattus norvegicus similar to CPN10-like protein (predicted) (RGD1561150_predicted), mRNA [XM_233177]		FALSE
A_44_P466331	0.0407761	0.00489818	-0.0194532	-0.0450889	0.169877	0.367032	1.34352	NM_001024752	Snx15	Rattus norvegicus sorting nexin 15 (Snx15), mRNA [NM_001024752]	NM_001024752	FALSE
A_44_P264880	0.0369002	0.00406042	-0.531602	-0.460956	0.613954	0.999168	1.38873	A_44_P264880	A_44_P264880			FALSE
A_44_P1033661	0.0188789	0.00124701	0.255153	-0.14453	0.13466	0.437534	1.02186	ENSRNOT00000035455	Prpf3_predicted	PREDICTED: Rattus norvegicus PRP3 pre-mRNA processing factor 3 homolog (yeast) (predicted) (Prpf3_predicted), mRNA [XM_342295]		FALSE
A_44_P558018	0.0370363	0.00408887	-0.152415	0.326192	0.84481	0.965421	1.17985	XR_006375	LOC686096	PREDICTED: Rattus norvegicus hypothetical protein LOC686096 (LOC686096), mRNA [XR_006375]	XR_006375	FALSE
A_44_P543844	0.0230961	0.00178771	-0.175693	0.343677	0.316641	0.27205	-0.464611	NM_001031663	LOC500419	Rattus norvegicus similar to RIKEN cDNA 2410005O16 (LOC500419), mRNA [NM_001031663]	NM_001031663	FALSE
A_42_P766275	0.0322162	0.00327337	-0.668331	-1.09453	0.0162842	0.199197	0.924212	NM_194353	RGD727855	Rattus norvegicus similar to SET (RGD727855), mRNA [NM_194353]	NM_194353	FALSE
A_44_P135304	0.0161408	0.000902373	-0.17868	-0.122774	0.302299	0.680388	1.26016	NM_134415	Cdk105	Rattus norvegicus CDK105 protein (Cdk105), mRNA [NM_134415]	NM_134415	FALSE
A_44_P1037041	0.0401206	0.00470644	0.681011	0.347885	0.530446	1.0849	3.88079	ENSRNOT00000012463	Map3k6_predicted	PREDICTED: Rattus norvegicus mitogen-activated protein kinase kinase kinase 6 (predicted) (Map3k6_predicted), mRNA [XM_232732]		FALSE
A_43_P23101	0.0420844	0.00519234	-0.32071	0.0734116	-0.155437	-0.4391	-1.15115	XM_341917	Bucs1_predicted	Rattus norvegicus similar to medium-chain acyl-CoA synthetase (LOC361638), mRNA [XM_341917]	XM_341917	FALSE
A_44_P142391	0.00481519	6.34247e-05	0.71846	-0.0575713	-0.504198	-0.804256	-1.78847	XM_341193	LOC360919	PREDICTED: Rattus norvegicus similar to alpha-fetoprotein (LOC360919), mRNA [XM_341193]	XM_341193	FALSE
A_44_P438143	0.0034568	3.12747e-05	-0.559507	-0.523483	-0.216729	0.53413	1.60827	NM_031588	Nrg1	Rattus norvegicus neuregulin 1 (Nrg1), mRNA [NM_031588]	NM_031588	FALSE
A_44_P114308	0.0185076	0.00120493	-0.984032	-0.270874	0.487975	1.25945	1.32104	NM_175761	Hspca	Rattus norvegicus heat shock protein 1, alpha (Hspca), mRNA [NM_175761]	NM_175761	FALSE
A_43_P13230	0.0040194	4.16118e-05	0.123307	-0.316073	-0.943305	-1.39973	-3.97646	NM_133606	Ehhadh	Rattus norvegicus enoyl-Coenzyme A, hydratase/3-hydroxyacyl Coenzyme A dehydrogenase (Ehhadh), mRNA [NM_133606]	NM_133606	FALSE
A_44_P994550	0.0141381	0.000705435	0.134617	0.669606	0.896264	1.16129	1.22273	ENSRNOT00000011688	Rarsl_predicted	PREDICTED: Rattus norvegicus arginyl-tRNA synthetase-like (predicted) (Rarsl_predicted), mRNA [XM_216367]		FALSE
A_44_P866704	0.0176313	0.00110084	0.128485	0.207541	0.0197797	-0.358737	-0.697391	AW920021	AW920021	AW920021 EST351325 Rat gene index, normalized rat, norvegicus, Bento Soares Rattus norvegicus cDNA clone RGIGP74 5' end, mRNA sequence [AW920021]	AW920021	FALSE
A_44_P542390	0.0210175	0.00150517	0.70926	-0.343019	-0.492824	-0.984629	-2.07432	NM_019140	Ptprd	Rattus norvegicus protein tyrosine phosphatase, receptor type, D (Ptprd), mRNA [NM_019140]	NM_019140	FALSE
A_44_P470661	0.0183478	0.00118474	-0.0415877	-0.626657	-0.49602	-0.970508	-1.7879	ENSRNOT00000013175	Serpina3m	Serine protease inhibitor A3M precursor (Serine protease inhibitor 2.4) (SPI-2.4) (Fragment). [Source:Uniprot/SWISSPROT;Acc:Q63556] [ENSRNOT00000013175]		FALSE
A_42_P548520	0.0226663	0.00171231	-0.270448	0.0488727	0.527948	0.688627	0.629863	ENSRNOT00000000674	Pyp	Pyp_mapped protein (Fragment). [Source:Uniprot/SPTREMBL;Acc:Q499R7] [ENSRNOT00000000674]		FALSE
A_44_P414625	0.00360077	3.51642e-05	-0.46548	0.518612	0.640122	-0.166563	-2.05496	NM_198780	Pck1	Rattus norvegicus phosphoenolpyruvate carboxykinase 1 (Pck1), mRNA [NM_198780]	NM_198780	FALSE
A_44_P220217	0.0228947	0.001753	-0.0464247	-0.146876	0.416634	0.540255	0.716799	ENSRNOT00000006851	RGD1562808_predicted	PREDICTED: Rattus norvegicus similar to ribosomal protein L31 (predicted) (RGD1562808_predicted), mRNA [XM_227719]		FALSE
A_44_P576056	0.0188496	0.001241	-0.275945	0.105233	0.411602	0.522618	0.684327	XM_239269	Ankfy1_predicted	PREDICTED: Rattus norvegicus ankyrin repeat and FYVE domain containing 1 (predicted) (Ankfy1_predicted), mRNA [XM_239269]	XM_239269	FALSE
A_43_P13272	0.00360925	3.55414e-05	0.822699	0.0766127	-0.0136595	-0.376987	-0.981267	NM_134432	Agt	Rattus norvegicus angiotensinogen (serpin peptidase inhibitor, clade A, member 8) (Agt), mRNA [NM_134432]	NM_134432	FALSE
A_43_P22542	0.0353338	0.00375229	-0.0837415	0.165112	0.19642	-0.180643	-1.79371	NM_001009399	Nsdhl	Rattus norvegicus NAD(P) dependent steroid dehydrogenase-like (Nsdhl), mRNA [NM_001009399]	NM_001009399	FALSE
A_44_P536724	0.00872622	0.000257982	0.0634369	0.692103	0.963495	1.19635	1.67013	NM_001024871	Rabepk	Rattus norvegicus Rab9 effector protein with kelch motifs (Rabepk), mRNA [NM_001024871]	NM_001024871	FALSE
A_44_P428487	0.0243971	0.00198679	0.0193458	-0.00326389	0.042556	-0.228301	-0.751039	NM_017015	Gusb	Rattus norvegicus glucuronidase, beta (Gusb), mRNA [NM_017015]	NM_017015	FALSE
A_44_P759588	0.00772366	0.000194419	0.410782	0.253933	-0.0884334	-0.543767	-2.07591	CF110322	CF110322	Shultzomica03573 Rat lung airway and parenchyma cDNA libraries Rattus norvegicus cDNA clone Contig3160 5', mRNA sequence [CF110322]	CF110322	FALSE
A_44_P1037556	0.0171155	0.0010404	-0.194966	0.286356	0.598278	0.918899	1.23259	NM_172032	Txndc9	Rattus norvegicus thioredoxin domain containing 9 (Txndc9), mRNA [NM_172032]	NM_172032	FALSE
A_44_P1033541	0.0169638	0.00102595	0.0440618	-0.065739	0.284139	0.439513	0.803245	NM_001008324	Eif4b	Rattus norvegicus eukaryotic translation initiation factor 4B (Eif4b), mRNA [NM_001008324]	NM_001008324	FALSE
A_44_P119993	0.0347774	0.00366166	-0.0395016	0.103441	0.206838	0.00808847	-2.25707	NM_022865	Gphn	Rattus norvegicus gephyrin (Gphn), mRNA [NM_022865]	NM_022865	FALSE
A_44_P704947	0.0129567	0.000602234	1.10329	0.560388	0.218177	-0.989219	-2.60613	A_44_P704947	A_44_P704947			FALSE
A_42_P831499	0.0107586	0.000399595	0.320104	0.0537637	-0.0850259	-0.423127	-1.42594	NM_012842	Egf	Rattus norvegicus epidermal growth factor (Egf), mRNA [NM_012842]	NM_012842	FALSE
A_44_P807091	0.0140707	0.000698319	-0.152496	-0.210208	0.0397963	0.337796	1.04219	XM_215082	Cd2bp2_predicted	PREDICTED: Rattus norvegicus CD2 antigen (cytoplasmic tail) binding protein 2 (predicted) (Cd2bp2_predicted), mRNA [XM_215082]	XM_215082	FALSE
A_44_P1015220	0.0120806	0.000509406	-0.0620906	0.400352	0.407837	0.759266	1.65332	NM_001014785	Ncbp1	Rattus norvegicus nuclear cap binding protein subunit 1, 80kDa (Ncbp1), mRNA [NM_001014785]	NM_001014785	FALSE
A_44_P501305	0.0313127	0.00311306	0.0705882	0.0370496	0.395973	0.595983	0.858947	ENSRNOT00000001735	RGD1305631_predicted	PREDICTED: Rattus norvegicus similar to 2810437L13Rik protein (predicted) (RGD1305631_predicted), mRNA [XM_221972]		FALSE
A_44_P457548	0.0445639	0.00571942	-0.562803	0.330517	0.166991	0.243296	-0.0669308	ENSRNOT00000030975	Parp9_predicted	Rattus norvegicus cDNA clone MGC:156739 IMAGE:7105391, complete cds [BC128756]		FALSE
A_43_P12970	0.0398408	0.00466195	-0.124791	0.201823	0.458068	0.593212	0.709938	U44091	Rere	Rattus norvegicus atrophin-1 related protein (rARP) mRNA, complete cds. [U44091]	U44091	FALSE
A_44_P342092	0.0497417	0.00687501	0.117722	0.285143	0.619769	0.736546	0.792795	NM_031110	Rps11	Rattus norvegicus ribosomal protein S11 (Rps11), mRNA [NM_031110]	NM_031110	FALSE
A_43_P20534	0.0164315	0.000953147	0.0423316	0.419274	0.635208	0.840278	1.42526	NM_001037770	Fbxo22	Rattus norvegicus F-box only protein 22 (Fbxo22), mRNA [NM_001037770]	NM_001037770	FALSE
A_44_P914438	0.00864364	0.000249935	-0.11541	-1.81051	-0.645184	-0.450667	1.84692	NM_080782	Cdkn1a	Rattus norvegicus cyclin-dependent kinase inhibitor 1A (Cdkn1a), mRNA [NM_080782]	NM_080782	FALSE
A_44_P871648	0.00902138	0.00027393	0.156026	0.0309473	0.641847	0.948589	1.43548	NM_001007724	Dcakd	Rattus norvegicus dephospho-CoA kinase domain containing (Dcakd), mRNA [NM_001007724]	NM_001007724	FALSE
A_44_P867478	0.0401317	0.00472461	-0.521563	0.0701898	-0.00757664	-0.441807	-1.34197	BC083806	Tex2	Rattus norvegicus testis expressed gene 2, mRNA (cDNA clone IMAGE:7109270), partial cds. [BC083806]	BC083806	FALSE
A_42_P598412	0.041874	0.00513707	0.144456	0.50119	0.484228	0.284771	-0.640728	NM_012907	Apobec1	Rattus norvegicus apolipoprotein B editing complex 1 (Apobec1), mRNA [NM_012907]	NM_012907	FALSE
A_44_P789383	0.00287761	2.02703e-05	-0.472338	-0.0249593	0.204664	0.426658	0.798187	BF555793	BF555793	BF555793 UI-R-A1-ei-f-08-0-UI.r1 UI-R-A1 Rattus norvegicus cDNA clone UI-R-A1-ei-f-08-0-UI 5', mRNA sequence [BF555793]	BF555793	FALSE
A_43_P17821	0.036057	0.00389789	-0.172908	-0.00546259	0.405214	0.417041	0.60004	ENSRNOT00000019617	Zfml_predicted	PREDICTED: Rattus norvegicus zinc finger, matrin-like (predicted) (Zfml_predicted), mRNA [XM_242556]		FALSE
A_44_P226162	0.0380437	0.00429254	1.56987	2.59114	2.23377	2.00212	-0.166057	AA997614	AA997614	AA997614 UI-R-C0-hy-g-09-0-UI.s1 UI-R-C0 Rattus norvegicus cDNA clone UI-R-C0-hy-g-09-0-UI 3', mRNA sequence [AA997614]	AA997614	FALSE
A_44_P201601	0.030012	0.00284761	-0.465703	0.107884	0.0221878	-0.19592	-1.31483	ENSRNOT00000011138	ENSRNOT00000011138	Rattus norvegicus hypothetical LOC296884 (LOC296884), mRNA [XM_216096]		FALSE
A_44_P1036068	0.00872622	0.000257939	-0.12283	0.283959	0.865681	1.02666	1.07327	ENSRNOT00000015130	RGD1311747_predicted	PREDICTED: Rattus norvegicus similar to 2700029M09Rik protein (predicted) (RGD1311747_predicted), mRNA [XM_214341]		FALSE
A_44_P494862	0.0159473	0.000876552	-0.15874	0.198279	0.729336	0.872435	1.10297	NM_001008309	Btf3	Rattus norvegicus basic transcription factor 3 (Btf3), mRNA [NM_001008309]	NM_001008309	FALSE
A_44_P550738	0.00481519	6.16361e-05	0.461584	0.468955	-0.0809719	-0.465003	-2.04712	NM_001014172	Rsrc1	Rattus norvegicus arginine/serine-rich coiled-coil 1 (Rsrc1), mRNA [NM_001014172]	NM_001014172	FALSE
A_44_P716145	0.0247242	0.00201993	-0.0433033	0.0805238	0.502781	0.578209	0.785751	NM_053570	Cxadr	Rattus norvegicus coxsackie virus and adenovirus receptor (Cxadr), mRNA [NM_053570]	NM_053570	FALSE
A_43_P21510	0.0214779	0.00156451	-0.790979	-0.665224	0.228052	0.0673702	-0.32867	NM_212518	Abcb7	Rattus norvegicus ATP-binding cassette, sub-family B (MDR/TAP), member 7 (Abcb7), mRNA [NM_212518]	NM_212518	FALSE
A_44_P138057	0.0135627	0.000659355	0.259221	-0.186556	0.328412	0.404484	1.04667	NM_031101	Rpl13	Rattus norvegicus ribosomal protein L13 (Rpl13), mRNA [NM_031101]	NM_031101	FALSE
A_44_P134213	0.00253917	1.03681e-05	0.0582761	-0.0357023	0.388272	0.829197	1.32483	NM_001034069	Tpm1	Rattus norvegicus tropomyosin 1, alpha (Tpm1), transcript variant 2, mRNA [NM_001034069]	NM_001034069	FALSE
A_44_P1015388	0.0481744	0.00655042	0.189684	0.32279	0.415736	0.59597	1.19406	ENSRNOT00000008882	Ankrd24_predicted	PREDICTED: Rattus norvegicus ankyrin repeat domain 24 (predicted) (Ankrd24_predicted), mRNA [XM_216841]		FALSE
A_44_P447814	0.029287	0.00272724	-0.264255	0.279203	0.621375	0.800984	1.24061	ENSRNOT00000020576	ENSRNOT00000020576	PREDICTED: Rattus norvegicus similar to EEA1 (Early Endosome Antigen, Rab effector) homolog family member (eea-1), transcript variant 2 (LOC680477), mRNA [XM_001057628]		FALSE
A_43_P10710	0.00253917	1.00875e-05	0.151571	0.0674055	0.412056	0.822834	1.48836	XM_233740	RGD1561264_predicted	PREDICTED: Rattus norvegicus similar to hypothetical protein MGC19604 (predicted) (RGD1561264_predicted), mRNA [XM_233740]	XM_233740	FALSE
A_43_P11800	0.0056316	0.000100653	-0.376333	-0.184026	0.512276	0.98002	1.816	NM_017059	Bax	Rattus norvegicus Bcl2-associated X protein (Bax), mRNA [NM_017059]	NM_017059	FALSE
A_44_P301817	0.00485073	6.69723e-05	0.617362	0.332687	0.48609	0.0878074	-0.948594	XM_213006	RGD1566313_predicted	PREDICTED: Rattus norvegicus similar to Murinoglobulin 1 homolog (predicted) (RGD1566313_predicted), mRNA [XM_213006]	XM_213006	FALSE
A_44_P959751	0.0306875	0.00295407	0.27405	0.189879	0.73327	0.907946	1.11181	A_44_P959751	A_44_P959751			FALSE
A_44_P419891	0.0221606	0.00163789	0.206955	-0.041072	0.751425	0.898108	1.25385	ENSRNOT00000003700	RGD1311433_predicted	PREDICTED: Rattus norvegicus similar to cDNA sequence BC024814 (predicted) (RGD1311433_predicted), mRNA [XM_213210]		FALSE
A_44_P456172	0.00717365	0.000163464	-0.14065	0.573501	0.861782	1.26756	2.00936	NM_001014265	Mterfd3	Rattus norvegicus MTERF domain containing 3 (Mterfd3), mRNA [NM_001014265]	NM_001014265	FALSE
A_44_P505025	0.0319904	0.00322029	0.103251	0.103099	0.0462823	-0.270221	-1.76254	NM_012820	Acsl1	Rattus norvegicus acyl-CoA synthetase long-chain family member 1 (Acsl1), mRNA [NM_012820]	NM_012820	FALSE
A_44_P346426	0.0179475	0.00114852	-0.345888	0.252444	0.0919004	0.413903	1.57728	NM_199410	Wdr12	Rattus norvegicus WD repeat domain 12 (Wdr12), mRNA [NM_199410]	NM_199410	FALSE
A_44_P525600	0.0479332	0.00647231	0.115385	0.150586	0.675389	0.878378	1.1796	NM_053370	Timm8a	Rattus norvegicus translocase of inner mitochondrial membrane 8 homolog a (yeast) (Timm8a), mRNA [NM_053370]	NM_053370	FALSE
A_44_P991273	0.0394445	0.00457964	0.24456	0.518789	0.694115	0.995914	1.18096	NM_001025275	Rad23b	Rattus norvegicus RAD23b homolog (S. cerevisiae) (Rad23b), mRNA [NM_001025275]	NM_001025275	FALSE
A_44_P491450	0.0149723	0.000795795	0.0551825	0.147212	0.0175247	-0.269695	-1.27141	NM_080786	Slco2b1	Rattus norvegicus solute carrier organic anion transporter family, member 2b1 (Slco2b1), mRNA [NM_080786]	NM_080786	FALSE
A_44_P271842	0.0342444	0.0035635	-0.221715	0.643296	0.617687	1.05588	0.766361	ENSRNOT00000015343	Zfp53_predicted	PREDICTED: Rattus norvegicus zinc finger protein 53 (predicted) (Zfp53_predicted), mRNA [XM_218041]		FALSE
A_44_P699567	0.023733	0.001885	-0.0482442	0.968754	0.797762	0.934097	2.36973	TC591196	TC591196			FALSE
A_44_P183048	0.0281621	0.00254224	-1.36049	-0.321582	-0.476886	-0.036369	1.81141	ENSRNOT00000013899	ENSRNOT00000013899	PREDICTED: Rattus norvegicus cytidine 5'-triphosphate synthase (predicted) (Ctps_predicted), mRNA [XM_233467]		FALSE
A_44_P456738	0.0494254	0.00680549	-0.670064	-0.58487	-0.514334	-0.122901	0.839489	NM_031614	Txnrd1	Rattus norvegicus thioredoxin reductase 1 (Txnrd1), mRNA [NM_031614]	NM_031614	FALSE
A_44_P356605	0.049143	0.00674769	0.0303086	0.349962	0.674825	0.873676	1.1152	ENSRNOT00000016042	Las1l_predicted	PREDICTED: Rattus norvegicus LAS1-like (S. cerevisiae) (predicted) (Las1l_predicted), mRNA [XM_216095]		FALSE
A_44_P468360	0.00478449	5.97357e-05	-0.191108	-0.421124	-0.968148	-1.46944	-2.94904	NM_019340	Rgs3	Rattus norvegicus regulator of G-protein signalling 3 (Rgs3), mRNA [NM_019340]	NM_019340	FALSE
A_44_P409605	0.0261855	0.0022352	0.179853	-0.213477	-0.136471	-0.485647	-1.18567	NM_001001505	Habp2	Rattus norvegicus hyaluronic acid binding protein 2 (Habp2), mRNA [NM_001001505]	NM_001001505	FALSE
A_44_P386375	0.0229872	0.00177312	-0.503194	0.352919	0.604335	0.953296	0.978781	NM_053842	Mapk1	Rattus norvegicus mitogen activated protein kinase 1 (Mapk1), mRNA [NM_053842]	NM_053842	FALSE
A_44_P1018181	0.00900868	0.000271078	0.436557	0.493921	0.926801	1.06183	1.21107	BC079139	Mmaa_predicted	Rattus norvegicus cDNA clone IMAGE:7127801, with apparent retained intron [BC079139]	BC079139	FALSE
A_42_P802550	0.0444041	0.00568706	-0.165395	-0.616537	-0.324078	0.0641701	0.686857	NM_017365	Pdlim1	Rattus norvegicus PDZ and LIM domain 1 (elfin) (Pdlim1), mRNA [NM_017365]	NM_017365	FALSE
A_43_P10581	0.0418239	0.00511308	0.400932	-0.152835	0.0574479	0.314242	0.923539	NM_145673	Mafk	Rattus norvegicus v-maf musculoaponeurotic fibrosarcoma oncogene family, protein K (avian) (Mafk), mRNA [NM_145673]	NM_145673	FALSE
A_44_P354018	0.0399287	0.00467707	-0.0326481	0.0188823	0.360576	0.488253	0.75675	ENSRNOT00000016204	RGD1559708_predicted	PREDICTED: Rattus norvegicus similar to ribosomal protein S10 (predicted) (RGD1559708_predicted), mRNA [XM_224779]		FALSE
A_42_P748948	0.0281621	0.00254305	0.647656	-0.657584	-0.0996895	0.296629	-1.32613	NM_012565	Gck	Rattus norvegicus glucokinase (Gck), mRNA [NM_012565]	NM_012565	FALSE
A_44_P203967	0.0251833	0.00207498	-0.670814	-0.0250047	0.169474	0.231063	0.366661	NM_001012098	Recql	Rattus norvegicus RecQ protein-like (Recql), mRNA [NM_001012098]	NM_001012098	FALSE
A_44_P283508	0.0487333	0.00665246	0.0406843	0.402247	0.0800979	0.0400369	-2.64433	NM_012792	Fmo1	Rattus norvegicus flavin containing monooxygenase 1 (Fmo1), mRNA [NM_012792]	NM_012792	FALSE
A_44_P313838	0.00222533	4.05571e-06	0.279479	0.397372	0.143588	-0.231244	-1.6228	NM_012597	Lipc	Rattus norvegicus lipase, hepatic (Lipc), mRNA [NM_012597]	NM_012597	FALSE
A_44_P313230	0.0241822	0.00195239	-0.180602	0.40596	0.412107	0.744469	1.24232	XM_001062645	LOC685888	PREDICTED: Rattus norvegicus hypothetical protein LOC685888, transcript variant 1 (LOC685888), mRNA [XM_001062645]	XM_001062645	FALSE
A_43_P14265	0.0047846	6.07682e-05	0.111187	0.40983	1.02374	1.25504	1.3251	TC608958	TC608958	Q2G7V7_NOVAD (Q2G7V7) Glycosyl transferase, group 1, partial (4%) [TC608958]		FALSE
A_44_P1057475	0.010261	0.000361532	-0.239168	0.313137	0.325346	0.205183	-0.587912	NM_001031663	LOC500419	Rattus norvegicus similar to RIKEN cDNA 2410005O16 (LOC500419), mRNA [NM_001031663]	NM_001031663	FALSE
A_44_P557168	0.00478449	5.95129e-05	0.146663	0.626539	0.604324	0.903407	0.873469	NM_053501	Slc25a14	Rattus norvegicus solute carrier family 25 (mitochondrial carrier, brain), member 14 (Slc25a14), mRNA [NM_053501]	NM_053501	FALSE
A_44_P1049242	0.00274976	1.52585e-05	0.231965	0.0309936	0.751	1.07089	1.45793	ENSRNOT00000051254	Ard1_predicted	PREDICTED: Rattus norvegicus N-acetyltransferase ARD1 homolog (S. cerevisiae) (predicted) (Ard1_predicted), mRNA [XM_343842]		FALSE
A_44_P1035706	0.00541982	9.20225e-05	-0.579666	-0.787373	0.257476	0.322681	1.35819	ENSRNOT00000056192	RGD1562012_predicted	AGENCOURT_17900243 NIH_MGC_234 Rattus norvegicus cDNA clone IMAGE:7189500 5', mRNA sequence [CK600012]		FALSE
A_44_P822943	0.0395472	0.00460096	-0.0739385	0.0412666	0.282448	0.686051	0.987315	TC601003	TC601003			FALSE
A_44_P340401	0.0347432	0.00364878	-0.0257858	0.184312	0.740247	0.795543	0.891086	XM_235376	RGD1565056_predicted	PREDICTED: Rattus norvegicus similar to ribosomal protein S24 (predicted) (RGD1565056_predicted), mRNA [XM_235376]	XM_235376	FALSE
A_44_P356047	0.0168057	0.000994587	-0.380365	0.0387536	0.176621	0.298081	0.727615	NM_031330	Hnrpab	Rattus norvegicus heterogeneous nuclear ribonucleoprotein A/B (Hnrpab), mRNA [NM_031330]	NM_031330	FALSE
A_44_P762321	0.0079837	0.000212172	0.0264301	-0.00418061	0.359875	0.587845	1.47961	TC611785	TC611785			FALSE
A_44_P477322	0.00313415	2.57569e-05	-0.368178	0.319028	0.119356	-0.595638	-2.04219	NM_031831	Rtn4	Rattus norvegicus reticulon 4 (Rtn4), mRNA [NM_031831]	NM_031831	FALSE
A_42_P617230	0.0177046	0.00112242	-0.238994	-0.0313635	0.0515485	0.422114	1.20862	NM_001025563	Pus1	Rattus norvegicus pseudouridine synthase 1 (Pus1), mRNA [NM_001025563]	NM_001025563	FALSE
A_44_P477047	0.0389682	0.0044994	-0.296615	-0.214803	0.218277	0.414966	0.672929	NM_171983	Spna2	Rattus norvegicus alpha-spectrin 2 (Spna2), mRNA [NM_171983]	NM_171983	FALSE
A_43_P17180	0.0258204	0.00215486	-0.126236	-0.0340303	0.276407	0.369868	0.870405	NM_001007696	mrpl9	Rattus norvegicus mitochondrial ribosomal protein L9 (mrpl9), mRNA [NM_001007696]	NM_001007696	FALSE
A_44_P198112	0.0179475	0.00114666	-0.15486	0.128932	0.346697	0.549774	0.669521	ENSRNOT00000023562	March5_predicted	PREDICTED: Rattus norvegicus membrane-associated ring finger (C3HC4) 5 (predicted) (March5_predicted), mRNA [XM_215286]		FALSE
A_44_P509014	0.0115547	0.000468609	-0.474753	-0.326593	0.130399	0.309065	0.872264	A_44_P509014	A_44_P509014			FALSE
A_44_P557962	0.0459644	0.00603764	0.00440848	0.246734	0.71766	0.813474	0.813355	XM_232602	XM_232602	Rattus norvegicus similar to tubulin alpha-1 chain - Chinese hamster (LOC297771), mRNA [XM_232602]	XM_232602	FALSE
A_44_P203514	0.0146255	0.000749961	-0.14671	0.17267	0.294674	0.632774	1.17613	NM_053974	Eif4e	Rattus norvegicus eukaryotic translation initiation factor 4E (Eif4e), mRNA [NM_053974]	NM_053974	FALSE
A_44_P257995	0.0376125	0.00421755	0.0642697	0.125466	0.277285	0.393902	0.763657	NM_001034919	RGD1562218	Rattus norvegicus similar to RIKEN cDNA 0610039J04 (RGD1562218), mRNA [NM_001034919]	NM_001034919	FALSE
A_44_P132598	0.0347212	0.00363721	0.219385	0.7404	0.922852	1.10159	1.27341	NM_182817	Smagp	Rattus norvegicus small cell adhesion glycoprotein (Smagp), mRNA [NM_182817]	NM_182817	FALSE
A_43_P19174	0.0498021	0.00688824	-0.217311	0.337847	0.636666	0.838761	0.970421	NM_001009542	MGC72992	Rattus norvegicus similar to programmed cell death 10 (MGC72992), mRNA [NM_001009542]	NM_001009542	FALSE
A_44_P260396	0.00762264	0.000182644	-0.114808	0.0526465	0.312835	0.584387	0.91506	NM_001014180	Alkbh3	Rattus norvegicus alkB, alkylation repair homolog 3 (E. coli) (Alkbh3), mRNA [NM_001014180]	NM_001014180	FALSE
A_44_P328872	0.0441156	0.00563036	-0.343642	-0.116469	0.243696	0.50469	1.39483	ENSRNOT00000038162	ENSRNOT00000038162	PREDICTED: Rattus norvegicus RAN binding protein 1 (predicted) (Ranbp1_predicted), mRNA [XM_341011]		FALSE
A_43_P17415	0.0110687	0.000419973	-0.734661	-0.391583	-0.160548	0.243486	2.16907	NM_198760	Slc16a6	Rattus norvegicus solute carrier family 16 (monocarboxylic acid transporters), member 6 (Slc16a6), mRNA [NM_198760]	NM_198760	FALSE
A_44_P524471	0.0433438	0.00545263	-0.443841	0.330687	0.421094	0.671531	1.2621	ENSRNOT00000018527	RGD1311752_predicted	Rattus norvegicus similar to RIKEN cDNA 1500031M22 (LOC294718), mRNA [XM_215477]		FALSE
A_44_P105741	0.0111457	0.000432233	0.0563468	0.435774	0.705927	0.957955	1.51476	ENSRNOT00000059664	Mak3_predicted	PREDICTED: Rattus norvegicus Mak3 homolog (S. cerevisiae) (predicted) (Mak3_predicted), mRNA [XM_213624]		FALSE
A_44_P1047259	0.0105669	0.000382428	0.552382	-0.00447381	0.148646	0.653246	1.01123	NM_053890	Ppp1r12a	Rattus norvegicus protein phosphatase 1, regulatory (inhibitor) subunit 12A (Ppp1r12a), mRNA [NM_053890]	NM_053890	FALSE
A_43_P17262	0.020155	0.00140121	0.00594759	-0.737363	-0.528193	-0.156873	-0.228724	XM_215641	Tmod4_predicted	PREDICTED: Rattus norvegicus tropomodulin 4 (predicted) (Tmod4_predicted), mRNA [XM_215641]	XM_215641	FALSE
A_44_P131470	0.015083	0.0008049	0.701232	0.662667	0.700197	0.487091	-0.202313	NM_001011946	Hexb	Rattus norvegicus hexosaminidase B (Hexb), mRNA [NM_001011946]	NM_001011946	FALSE
A_44_P356551	0.0260339	0.00221069	0.280525	-0.270508	-0.0707375	-0.103436	-0.459397	ENSRNOT00000025392	Jph3_predicted	Rattus norvegicus similar to junctophilin 3; junctophilin type 3 (LOC307916), mRNA [XM_226549]		FALSE
A_44_P254687	0.00839412	0.000235742	0.0505966	-0.0600184	0.441048	0.686047	1.09984	ENSRNOT00000016490	Nthl1_predicted	PREDICTED: Rattus norvegicus nth (endonuclease III)-like 1 (E.coli) (predicted) (Nthl1_predicted), mRNA [XM_213228]		FALSE
A_42_P723437	0.00321992	2.71895e-05	-0.37541	0.207588	0.639475	1.12614	1.88495	NM_001007661	Thyn1	Rattus norvegicus thymocyte nuclear protein 1 (Thyn1), mRNA [NM_001007661]	NM_001007661	FALSE
A_44_P1042125	0.00258147	1.25361e-05	-0.246716	0.0703601	0.535975	0.809875	1.16578	XM_001060585	LOC682709	PREDICTED: Rattus norvegicus hypothetical protein LOC682709 (LOC682709), mRNA [XM_001060585]	XM_001060585	FALSE
A_44_P529403	0.0472892	0.00634153	-0.0692616	-0.419189	-0.0884487	0.117078	0.771016	NM_001004281	Tbc1d20	Rattus norvegicus TBC1 domain family, member 20 (Tbc1d20), mRNA [NM_001004281]	NM_001004281	FALSE
A_44_P442589	0.0391817	0.0045352	-0.301891	-0.590672	-0.775395	-0.876026	-2.14142	NM_053599	Efna1	Rattus norvegicus ephrin A1 (Efna1), mRNA [NM_053599]	NM_053599	FALSE
A_44_P768645	0.0023314	6.46955e-06	1.02894	0.673204	0.108792	-1.06055	-2.45594	TC608534	TC608534			FALSE
A_44_P118649	0.0167083	0.000981271	-0.401564	0.229788	0.44505	0.309632	-0.270015	NM_199383	Yipf1	Rattus norvegicus Yip1 domain family, member 1 (Yipf1), mRNA [NM_199383]	NM_199383	FALSE
A_44_P680056	0.00954024	0.000308013	-0.614278	-0.221372	-0.187415	0.111862	0.578153	ENSRNOT00000051859	Ap1g1	Gamma-adaptin (Fragment). [Source:Uniprot/SPTREMBL;Acc:Q8R525] [ENSRNOT00000051859]		FALSE
A_44_P1004536	0.0224562	0.00167292	0.221634	0.917374	0.840317	0.407432	-1.38245	NM_053995	Bdh1	Rattus norvegicus 3-hydroxybutyrate dehydrogenase, type 1 (Bdh1), nuclear gene encoding mitochondrial protein, mRNA [NM_053995]	NM_053995	FALSE
A_44_P538989	0.0480933	0.0065317	0.153765	0.531559	0.683695	0.833336	1.17959	NM_001014010	RGD1308147	Rattus norvegicus similar to expressed sequence AW209491 (RGD1308147), mRNA [NM_001014010]	NM_001014010	FALSE
A_44_P741147	0.0490123	0.00672451	0.493096	0.121042	0.178969	0.459597	1.07535	AW917588	AW917588	AW917588 EST348892 Rat gene index, normalized rat, norvegicus, Bento Soares Rattus norvegicus cDNA clone RGIEF65 5' end, mRNA sequence [AW917588]	AW917588	FALSE
A_42_P732126	0.0418886	0.00514359	-0.603501	-0.456289	-0.169572	-0.072614	0.589798	XM_216755	Nek9_predicted	PREDICTED: Rattus norvegicus NIMA (never in mitosis gene a)- related kinase 9 (predicted) (Nek9_predicted), mRNA [XM_216755]	XM_216755	FALSE
A_43_P22124	0.0352477	0.00373126	-0.504176	-0.0863797	0.108998	0.420968	0.654143	NM_213625	Dnajc7	Rattus norvegicus DnaJ (Hsp40) homolog, subfamily C, member 7 (Dnajc7), mRNA [NM_213625]	NM_213625	FALSE
A_42_P641168	0.0121645	0.000516726	-0.20396	0.166283	0.479813	0.55474	1.01699	NM_024001	Mrs2l	Rattus norvegicus MRS2-like, magnesium homeostasis factor (S. cerevisiae) (Mrs2l), mRNA [NM_024001]	NM_024001	FALSE
A_44_P148383	0.00495443	7.35556e-05	0.738681	1.4684	0.883209	0.300499	-1.18949	XR_007587	RGD1564952_predicted	PREDICTED: Rattus norvegicus similar to zinc finger, RAN-binding domain containing 3 (predicted) (RGD1564952_predicted), mRNA [XR_007587]	XR_007587	FALSE
A_43_P17083	0.0457343	0.00600386	0.407919	0.938531	0.742862	1.49331	1.89273	CB547915	CB547915	CB547915 AMGNNUC:NRHY1-00001-D7-Z W Rat hypothalamus (10480) Rattus norvegicus cDNA clone nrhy1-00001-d7, mRNA sequence [CB547915]	CB547915	FALSE
A_44_P461470	0.0308312	0.00299464	-0.752981	-0.0606326	-0.0495067	-0.0982503	-0.5174	NM_053714	Ank	Rattus norvegicus progressive ankylosis homolog (mouse) (Ank), mRNA [NM_053714]	NM_053714	FALSE
A_44_P132822	0.0222683	0.00164704	-0.967806	0.273389	0.233004	0.55252	0.132475	NM_001005265	Crry	Rattus norvegicus complement receptor related protein (Crry), transcript variant 3, mRNA [NM_001005265]	NM_001005265	FALSE
A_44_P609306	0.0268259	0.00233378	0.628125	1.00231	0.874615	0.639852	-1.3426	TC613435	TC613435			FALSE
A_44_P417104	0.0259156	0.00217832	0.0656985	0.393322	0.407648	0.280784	-0.453823	ENSRNOT00000023516	Sucla2_predicted	PREDICTED: Rattus norvegicus succinate-Coenzyme A ligase, ADP-forming, beta subunit (predicted) (Sucla2_predicted), mRNA [XM_341354]		FALSE
A_44_P483888	0.0122712	0.000525697	-0.44412	0.517662	0.659661	0.858236	1.3652	XM_001060262	LOC681086	PREDICTED: Rattus norvegicus similar to Phosphatidylinositol-glycan biosynthesis, class F protein (PIG-F) (LOC681086), mRNA [XM_001060262]	XM_001060262	FALSE
A_44_P325189	0.01843	0.0011989	0.587982	-0.114806	-0.664833	-1.0529	-2.40284	NM_175578	Dscr1l1	Rattus norvegicus Down syndrome critical region gene 1-like 1 (Dscr1l1), mRNA [NM_175578]	NM_175578	FALSE
A_44_P852754	0.0223268	0.00165255	0.545001	0.0270911	0.142404	0.730183	1.73081	TC576606	TC576606	Q6AY36_RAT (Q6AY36) Coronin, actin binding protein 2A (Predicted), complete [TC576606]		FALSE
A_42_P703664	0.0497417	0.00687461	0.00499654	-0.00397497	0.153986	0.454905	1.95536	CV118897	Srxn1	AGENCOURT_31534390 NIH_MGC_238 Rattus norvegicus cDNA clone IMAGE:7455497 5', mRNA sequence [CV118897]	CV118897	FALSE
A_44_P1058389	0.0118035	0.000491919	-0.0938351	0.161052	0.79619	1.10414	1.69856	NM_012992	Npm1	Rattus norvegicus nucleophosmin 1 (Npm1), mRNA [NM_012992]	NM_012992	FALSE
A_42_P825947	0.00451246	5.29701e-05	-0.0379511	0.42713	0.568807	0.620579	1.11761	NM_001038994	Ccdc23	Rattus norvegicus coiled-coil domain containing 23 (Ccdc23), transcript variant 1, mRNA [NM_001038994]	NM_001038994	FALSE
A_44_P314353	0.0168057	0.00099409	-0.543166	-0.14654	-0.00193197	0.0742471	0.64363	NM_001037765	RGD1306649	Rattus norvegicus similar to RIKEN cDNA 4633402N23 gene (RGD1306649), mRNA [NM_001037765]	NM_001037765	FALSE
A_44_P152445	0.0111021	0.000424915	-0.261696	-0.19476	0.329305	0.564085	0.850809	ENSRNOT00000026646	Eif4e2_predicted	PREDICTED: Rattus norvegicus eukaryotic translation initiation factor 4E member 2 (predicted) (Eif4e2_predicted), mRNA [XM_343616]		FALSE
A_42_P512417	0.0347491	0.00365127	0.484253	0.499542	0.64844	0.831381	1.25544	NM_019252	Dpm2	Rattus norvegicus dolichol-phosphate (beta-D) mannosyltransferase 2 (Dpm2), mRNA [NM_019252]	NM_019252	FALSE
A_42_P623358	0.0117967	0.000487571	0.480018	0.170566	-0.0109377	-0.201601	-0.389617	NM_012642	Ren1	Rattus norvegicus renin 1 (Ren1), mRNA [NM_012642]	NM_012642	FALSE
A_43_P16530	0.00732578	0.000172013	0.108012	0.453458	0.635577	0.959252	1.66261	XM_213733	Pop7_predicted	PREDICTED: Rattus norvegicus processing of precursor 7, ribonuclease P family, (S. cerevisiae) (predicted) (Pop7_predicted), mRNA [XM_213733]	XM_213733	FALSE
A_44_P492594	0.0417916	0.0050946	-0.560041	-0.304763	0.0590574	0.065432	0.761511	NM_001008278	RGD1308696	Rattus norvegicus similar to hypothetical protein D11Ertd497e (RGD1308696), mRNA [NM_001008278]	NM_001008278	FALSE
A_43_P14271	0.00504905	7.73294e-05	0.113886	-0.0225832	0.470335	0.593255	0.843339	NM_017152	Rps17	Rattus norvegicus ribosomal protein S17 (Rps17), mRNA [NM_017152]	NM_017152	FALSE
A_44_P902209	0.0185935	0.00121415	-0.189729	0.0537444	0.389118	0.501594	0.59937	NM_016990	Add1	Rattus norvegicus adducin 1 (alpha) (Add1), mRNA [NM_016990]	NM_016990	FALSE
A_44_P152120	0.040835	0.00490789	-0.610758	0.0811641	0.325313	0.443991	0.33509	NM_001014151	RGD1308579	Rattus norvegicus similar to RIKEN cDNA 3110052N05 (RGD1308579), mRNA [NM_001014151]	NM_001014151	FALSE
A_44_P289445	0.0167461	0.000985911	-0.386573	-0.414518	0.0558462	0.235597	1.01216	NM_001014093	Parp16	Rattus norvegicus poly (ADP-ribose) polymerase family, member 16 (Parp16), mRNA [NM_001014093]	NM_001014093	FALSE
A_43_P17958	0.0145159	0.000740599	0.233749	0.212848	0.109889	-0.25198	-1.89364	XM_001067400	LOC688555	PREDICTED: Rattus norvegicus similar to autophagy-related 10-like (LOC688555), mRNA [XM_001067400]	XM_001067400	FALSE
A_44_P959355	0.047151	0.00630307	-0.748857	-0.2588	0.0382469	0.0977049	0.21852	XR_008469	LOC361963	PREDICTED: Rattus norvegicus similar to Phosphoglycerate mutase 1 (Phosphoglycerate mutase isozyme B) (PGAM-B) (BPG-dependent PGAM 1) (LOC361963), mRNA [XR_008469]	XR_008469	FALSE
A_44_P963992	0.0311029	0.00304927	0.0918186	1.05507	0.449801	0.362111	-0.163759	TC629601	TC629601			FALSE
A_44_P901239	0.00258304	1.29903e-05	0.720044	0.533393	0.482112	-0.316489	-1.86608	TC603455	TC603455	Q6DEP5_XENTR (Q6DEP5) MGC89973 protein (Ribosomal protein S11), partial (6%) [TC603455]		FALSE
A_42_P647710	0.0265726	0.0022958	-0.629139	-0.163068	-0.144199	0.0779166	0.600132	NM_001024237	Farsla	Rattus norvegicus phenylalanine-tRNA synthetase-like, alpha subunit (Farsla), mRNA [NM_001024237]	NM_001024237	FALSE
A_44_P244851	0.00253917	1.18086e-05	0.642799	0.827538	-0.0389854	-0.794486	-3.30596	NM_019292	Ca3	Rattus norvegicus carbonic anhydrase 3 (Ca3), mRNA [NM_019292]	NM_019292	FALSE
A_43_P17202	0.0472615	0.0063322	-0.00720596	-0.0850359	0.312311	0.872767	1.08815	NM_001012026	Mdm4	Rattus norvegicus transformed mouse 3T3 cell double minute 4 (Mdm4), mRNA [NM_001012026]	NM_001012026	FALSE
A_44_P407722	0.0327552	0.00336485	-0.12505	0.804154	1.16674	1.21699	1.05123	XR_008573	RGD1565495_predicted	PREDICTED: Rattus norvegicus similar to retinoblastoma binding protein 7 (predicted) (RGD1565495_predicted), mRNA [XR_008573]	XR_008573	FALSE
A_44_P229490	0.0333041	0.00344248	0.130959	0.0273888	0.466481	0.572098	0.735687	NM_022506	Rpl31	Rattus norvegicus ribosomal protein L31 (Rpl31), mRNA [NM_022506]	NM_022506	FALSE
A_44_P499645	0.0386852	0.00443813	1.18748	0.297762	0.125956	0.476222	1.13228	AW434065	AW434065	AW434065 UI-R-BJ0p-afo-h-02-0-UI.s1 UI-R-BJ0p Rattus norvegicus cDNA clone UI-R-BJ0p-afo-h-02-0-UI 3', mRNA sequence [AW434065]	AW434065	FALSE
A_44_P110606	0.0172456	0.0010597	-0.752457	0.109945	0.486934	0.643557	0.619534	ENSRNOT00000026827	Dus2l_predicted	PREDICTED: Rattus norvegicus dihydrouridine synthase 2-like, SMM1 homolog (S. cerevisiae) (predicted) (Dus2l_predicted), mRNA [XM_214665]		FALSE
A_43_P19945	0.0108093	0.00040334	-0.0292959	0.32275	0.621208	0.750449	1.10213	ENSRNOT00000058561	ENSRNOT00000058561	Rattus norvegicus similar to hypothetical protein (LOC307249), mRNA [XM_225699]		FALSE
A_44_P373272	0.027319	0.00241569	-0.00131142	-0.460174	-1.17793	-1.47684	-2.23526	ENSRNOT00000002576	ENSRNOT00000002576	PREDICTED: Rattus norvegicus similar to Proline oxidase, mitochondrial precursor (Proline dehydrogenase), transcript variant 2 (LOC680409), mRNA [XM_001058939]		FALSE
A_43_P17260	0.00304726	2.38884e-05	0.539681	1.08321	0.53429	-0.0260434	-1.86097	NM_001014172	Rsrc1	Rattus norvegicus arginine/serine-rich coiled-coil 1 (Rsrc1), mRNA [NM_001014172]	NM_001014172	FALSE
A_44_P354444	0.0305066	0.00292222	-0.468326	-0.146265	0.107638	0.371416	0.824376	NM_001007666	Bcs1l	Rattus norvegicus BCS1-like (yeast) (Bcs1l), mRNA [NM_001007666]	NM_001007666	FALSE
A_44_P1050015	0.0355151	0.00380377	0.384619	1.00272	1.23855	1.44931	1.75892	NM_176857	Vcpip1	Rattus norvegicus valosin containing protein (p97)/p47 complex interacting protein 1 (Vcpip1), mRNA [NM_176857]	NM_176857	FALSE
A_44_P553424	0.0389682	0.00450009	0.014222	-0.898114	-0.594965	-1.09531	-2.37685	ENSRNOT00000039228	Pnpla5_predicted	PREDICTED: Rattus norvegicus patatin-like phospholipase domain containing 5 (predicted) (Pnpla5_predicted), mRNA [XM_235538]		FALSE
A_43_P17861	0.00258304	1.29072e-05	0.311651	0.512297	0.393675	-0.175891	-1.70534	ENSRNOT00000015015	Tcfdp2_predicted	PREDICTED: Rattus norvegicus transcription factor Dp 2 (predicted) (Tcfdp2_predicted), mRNA [XM_217232]		FALSE
A_44_P941895	0.0404039	0.00479695	0.208576	0.528299	0.795065	0.751302	1.11505	ENSRNOT00000018369	Prosc_predicted	PREDICTED: Rattus norvegicus proline synthetase co-transcribed (predicted) (Prosc_predicted), mRNA [XM_224947]		FALSE
A_42_P805300	0.0199306	0.00137416	0.304026	0.214133	0.350543	0.110278	-0.504915	NM_030826	Gpx1	Rattus norvegicus glutathione peroxidase 1 (Gpx1), mRNA [NM_030826]	NM_030826	FALSE
A_42_P765066	0.0496069	0.00684152	0.00799382	0.0582546	0.693476	0.913271	0.62482	NM_021588	Mb	Rattus norvegicus myoglobin (Mb), mRNA [NM_021588]	NM_021588	FALSE
A_43_P17071	0.0366389	0.00400039	-0.328461	-0.177597	0.00345707	0.137411	0.712863	XM_231161	Gapvd1_predicted	PREDICTED: Rattus norvegicus GTPase activating protein and VPS9 domains 1 (predicted) (Gapvd1_predicted), mRNA [XM_231161]	XM_231161	FALSE
A_44_P248516	0.030967	0.00302911	0.114449	0.315409	0.444304	0.685149	1.12288	ENSRNOT00000012466	RGD1310440_predicted	PREDICTED: Rattus norvegicus similar to hypothetical protein (predicted) (RGD1310440_predicted), mRNA [XM_001057055]		FALSE
A_43_P13018	0.010121	0.000346912	0.365728	0.893047	1.04742	1.29099	1.64696	NM_054004	Cand1	Rattus norvegicus cullin associated and neddylation disassociated 1 (Cand1), mRNA [NM_054004]	NM_054004	FALSE
A_44_P252345	0.00485073	6.75155e-05	-0.378924	0.25517	0.787065	0.978578	0.833115	NM_001077530	LOC683519	Rattus norvegicus similar to ribosomal protein, mitochondrial, S22 (LOC683519), mRNA [NM_001077530]	NM_001077530	FALSE
A_44_P320620	0.0102904	0.000367926	-0.297274	-0.153485	0.303648	0.802767	1.10835	NM_019131	Tpm1	Rattus norvegicus tropomyosin 1, alpha (Tpm1), transcript variant 6, mRNA [NM_019131]	NM_019131	FALSE
A_44_P367676	0.0413465	0.00500206	0.135311	-0.2522	0.343573	0.0658376	1.11915	NM_017213	Odf2	Rattus norvegicus outer dense fiber of sperm tails 2 (Odf2), mRNA [NM_017213]	NM_017213	FALSE
A_43_P18737	0.0106719	0.000390733	-0.101892	-0.129161	0.217539	0.464521	1.30926	CB544852	CB544852	CB544852 AMGNNUC:MRBE3-00122-B9-A rat brain E15 (10374) Rattus norvegicus cDNA clone mrbe3-00122-b9 5', mRNA sequence [CB544852]	CB544852	FALSE
A_44_P998500	0.0121611	0.000515284	0.509517	0.771664	0.570049	0.110738	-0.324754	XM_213320	XM_213320	Rattus norvegicus similar to RIKEN cDNA 4930449E07 (LOC287371), mRNA [XM_213320]	XM_213320	FALSE
A_44_P899255	0.00786878	0.000201554	0.135683	-0.133234	0.0134301	-0.457898	-1.43327	TC593853	TC593853	Q4RBE0_TETNG (Q4RBE0) Chromosome undetermined SCAF21624, whole genome shotgun sequence. (Fragment), partial (6%) [TC593853]		FALSE
A_44_P454172	0.00976589	0.000324121	0.301939	0.0303091	-0.152388	-0.635379	-1.66441	NM_139102	Dmgdh	Rattus norvegicus dimethylglycine dehydrogenase precursor (Dmgdh), mRNA [NM_139102]	NM_139102	FALSE
A_44_P625333	0.00541982	9.22634e-05	0.419295	-0.00605577	0.0101894	0.0246496	-0.678621	TC584736	TC584736	Q5KKJ6_CRYNE (Q5KKJ6) Expressed protein, partial (6%) [TC584736]		FALSE
A_43_P13246	0.0401463	0.0047304	-0.532986	0.036964	0.261963	0.13689	0.67974	NM_134361	Xcl1	Rattus norvegicus chemokine (C motif) ligand 1 (Xcl1), mRNA [NM_134361]	NM_134361	FALSE
A_44_P897781	0.0237019	0.00187485	1.03579	1.44555	1.46635	0.991399	-0.548647	AW915141	AW915141	AW915141 EST346445 Normalized rat embryo, Bento Soares Rattus sp. cDNA clone RGICK89 5' end, mRNA sequence [AW915141]	AW915141	FALSE
A_44_P228839	0.0369158	0.0040641	-0.082544	-0.029133	-0.00356865	-0.166536	-0.977168	NM_001008374	Pgrmc2	Rattus norvegicus progesterone receptor membrane component 2 (Pgrmc2), mRNA [NM_001008374]	NM_001008374	FALSE
A_42_P643349	0.0118035	0.000491154	0.6164	0.0125341	0.00909907	-0.352822	-0.51723	XM_001081553	LOC688228	PREDICTED: Rattus norvegicus similar to Myosin light polypeptide 4 (Myosin light chain 1, atrial isoform) (LOC688228), mRNA [XM_001081553]	XM_001081553	FALSE
A_44_P1053316	0.019053	0.00127642	-0.264998	0.137186	0.279349	0.585318	0.763087	TC594299	TC594299	APTX_RAT (Q8K4H4) Aprataxin homolog (Forkhead-associated domain histidine triad-like protein) (FHA-HIT), complete [TC594299]		FALSE
A_44_P396460	0.0309443	0.0030238	0.904955	0.608203	0.621192	0.335929	-0.211924	ENSRNOT00000028295	Scap_predicted	Rattus norvegicus SREBP cleavage activating protein (predicted), mRNA (cDNA clone MGC:156813 IMAGE:7189794), complete cds [BC131852]		FALSE
A_44_P138347	0.0156772	0.000855244	-0.109299	0.434915	0.537473	0.704472	1.04674	NM_001034958	LOC619573	Rattus norvegicus hypothetical protein LOC619573 (LOC619573), mRNA [NM_001034958]	NM_001034958	FALSE
A_44_P471757	0.0388426	0.00447729	-0.221693	0.0465003	0.137035	0.328519	0.953849	ENSRNOT00000025467	Tcerg1_predicted	PREDICTED: Rattus norvegicus transcription elongation regulator 1 (CA150) (predicted) (Tcerg1_predicted), mRNA [XM_225983]		FALSE
A_44_P464042	0.035451	0.00378555	-0.373918	-0.602856	0.2223	0.56905	1.23029	ENSRNOT00000037588	RGD1304646_predicted	PREDICTED: Rattus norvegicus similar to mitotic control protein dis3 homolog (predicted) (RGD1304646_predicted), mRNA [XM_224449]		FALSE
A_44_P715517	0.040616	0.00486161	0.0560237	-0.0182276	0.109169	0.153252	0.764903	NM_001017451	RGD1309228	Rattus norvegicus similar to putative protein, with at least 9 transmembrane domains, of eukaryotic origin (43.9 kD) (2G415) (RGD1309228), mRNA [NM_001017451]	NM_001017451	FALSE
A_43_P10925	0.0474199	0.00636809	1.46124	1.54957	1.3252	0.717648	-1.82179	XM_233065	RGD1561090_predicted	PREDICTED: Rattus norvegicus similar to protein tyrosine phosphatase, receptor type, D (predicted) (RGD1561090_predicted), mRNA [XM_233065]	XM_233065	FALSE
A_44_P314152	0.019767	0.00135317	0.0758492	-0.102847	0.433768	0.580577	0.724952	ENSRNOT00000045604	RGD1561317_predicted	PREDICTED: Rattus norvegicus similar to ribosomal protein L31 (predicted) (RGD1561317_predicted), mRNA [XM_345433]		FALSE
A_42_P707617	0.0446951	0.00575763	-0.230991	0.283282	0.403957	0.678913	0.67695	NM_013053	Ywhaq	Rattus norvegicus tyrosine 3-monooxygenase/tryptophan 5-monooxygenase activation protein, theta polypeptide (Ywhaq), mRNA [NM_013053]	NM_013053	FALSE
A_44_P267103	0.011511	0.000465009	0.157258	0.0685189	0.423513	0.581731	0.868605	ENSRNOT00000021725	LOC296165	60S ribosomal protein L12. [Source:Uniprot/SWISSPROT;Acc:P23358] [ENSRNOT00000042736]		FALSE
A_42_P811559	0.0125566	0.000556415	-0.365084	-0.000378013	0.422754	0.668601	1.02997	NM_019259	C1qbp	Rattus norvegicus complement component 1, q subcomponent binding protein (C1qbp), mRNA [NM_019259]	NM_019259	FALSE
A_44_P156782	0.0408433	0.00493459	0.391306	0.627887	0.693599	0.824589	1.0756	NM_001013879	RGD1311847	Rattus norvegicus similar to 1700030K09Rik protein (RGD1311847), mRNA [NM_001013879]	NM_001013879	FALSE
A_44_P466507	0.0195357	0.00132608	-0.713675	0.0257563	0.412515	0.533645	1.09547	NM_001077672	Cstf3_predicted	Rattus norvegicus cleavage stimulation factor, 3' pre-RNA, subunit 3 (predicted) (Cstf3_predicted), mRNA [NM_001077672]	NM_001077672	FALSE
A_44_P107605	0.0440411	0.00560632	0.0482283	0.107722	0.449131	0.606862	0.714717	A_44_P107605	A_44_P107605			FALSE
A_44_P396123	0.00321992	2.71971e-05	-0.268579	-0.231725	0.169634	0.416328	0.997875	ENSRNOT00000016499	S100a16_predicted	PREDICTED: Rattus norvegicus S100 calcium binding protein A16 (predicted) (S100a16_predicted), mRNA [XM_342291]		FALSE
A_44_P293083	0.0287391	0.00264248	-0.069753	-0.0640607	0.230735	0.527318	0.73495	XM_001054881	LOC679898	PREDICTED: Rattus norvegicus similar to zinc finger, matrin type 2 (LOC679898), mRNA [XM_001054881]	XM_001054881	FALSE
A_43_P17605	0.0126307	0.00056686	-0.351451	0.127771	0.366167	0.641177	1.18476	ENSRNOT00000024126	Tnfsf5ip1_predicted	PREDICTED: Rattus norvegicus tumor necrosis factor superfamily, member 5-induced protein 1 (predicted) (Tnfsf5ip1_predicted), mRNA [XM_214550]		FALSE
A_44_P1009426	0.0311933	0.00308552	-0.00995082	0.306552	0.487988	0.536053	1.30144	XM_345633	XM_345633	Rattus norvegicus similar to mismatch repair protein MSH6 (LOC366547), mRNA [XM_345633]	XM_345633	FALSE
A_43_P16664	0.0311029	0.00304637	-0.107083	-0.36905	-0.243077	0.101262	0.509147	NM_001009630	RGD1311899	Rattus norvegicus similar to RIKEN cDNA 2210016L21 gene (RGD1311899), mRNA [NM_001009630]	NM_001009630	FALSE
A_44_P1056401	0.0171155	0.00104123	0.20181	0.388772	0.242679	0.225289	-0.676769	NM_001004261	RGD1303232	Rattus norvegicus Phytn_dehydro and Pyr_redox domain containing protein RGD1303232 (RGD1303232), mRNA [NM_001004261]	NM_001004261	FALSE
A_44_P329909	0.00222533	5.30711e-06	1.1048	1.76587	-0.0648879	-0.89125	-2.2539	AW143475	AW143475	AW143475 EST293875 Normalized rat embryo, Bento Soares Rattus sp. cDNA clone RGIBV51 5' end, mRNA sequence [AW143475]	AW143475	FALSE
A_42_P582777	0.0116882	0.00047778	0.166986	0.301444	0.46321	0.78215	1.04003	ENSRNOT00000022714	RGD1565431_predicted	PREDICTED: Rattus norvegicus similar to MAPK-interacting and spindle-stabilizing protein (predicted) (RGD1565431_predicted), mRNA [XM_574580]		FALSE
A_44_P276919	0.0124563	0.000542172	0.16679	0.942595	0.985323	0.820729	0.0459127	A_44_P276919	A_44_P276919			FALSE
A_42_P842513	0.0127669	0.000576534	0.271588	0.0168756	0.186682	0.330032	0.638098	NM_031077	Pctk1	Rattus norvegicus PCTAIRE-motif protein kinase 1 (Pctk1), transcript variant 2, mRNA [NM_031077]	NM_031077	FALSE
A_44_P313988	0.0365996	0.00398609	0.0276412	-0.0144373	0.412785	0.546778	1.30969	XM_219939	Peo1_predicted	PREDICTED: Rattus norvegicus progressive external ophthalmoplegia 1 homolog (human) (predicted) (Peo1_predicted), mRNA [XM_219939]	XM_219939	FALSE
A_44_P236355	0.0460243	0.00607763	0.150069	-0.131669	0.286899	0.575299	0.987218	ENSRNOT00000005032	Rps6kc1	Rattus norvegicus ribosomal protein S6 kinase, polypeptide 1, mRNA (cDNA clone IMAGE:5599778) [BC064438]		FALSE
A_44_P513677	0.0196724	0.00134271	-0.246956	0.0332258	0.531721	0.535787	0.79463	XR_006108	LOC298519	PREDICTED: Rattus norvegicus similar to chaperonin subunit 7 (eta) (LOC298519), mRNA [XR_006108]	XR_006108	FALSE
A_43_P13114	0.0102437	0.00035761	0.229399	-0.161243	0.322156	1.50219	1.75499	NM_130416	Anxa7	Rattus norvegicus annexin A7 (Anxa7), mRNA [NM_130416]	NM_130416	FALSE
A_44_P513058	0.0189082	0.00125826	-0.408748	0.00400633	0.448956	0.676212	1.09628	AF053360	Tpm3	Rattus norvegicus nonmuscle tropomyosin 5 (Tpm5) isoforms NM 8 and NM 9 mRNA, partial cds. [AF053360]	AF053360	FALSE
A_44_P468665	0.00772366	0.000194821	-0.011578	-0.0429219	0.213289	0.341132	0.79247	ENSRNOT00000027680	ENSRNOT00000027680	PREDICTED: Rattus norvegicus similar to K11B4.2 (LOC688966), mRNA [XM_001067949]		FALSE
A_44_P1003090	0.0161157	0.000898709	-0.5205	0.219882	0.224479	0.618767	1.85704	NM_199083	LOC289809	Rattus norvegicus putatative 28 kDa protein (LOC289809), mRNA [NM_199083]	NM_199083	FALSE
A_43_P16836	0.0024456	7.439e-06	-0.0108111	0.233021	0.36078	1.20978	1.51676	NM_001034920	Cblc	Rattus norvegicus Casitas B-lineage lymphoma c (Cblc), mRNA [NM_001034920]	NM_001034920	FALSE
A_44_P424723	0.048823	0.0066829	0.0898911	0.448628	0.68809	0.655915	0.857502	NM_021693	Snf1lk	Rattus norvegicus SNF1-like kinase (Snf1lk), mRNA [NM_021693]	NM_021693	FALSE
A_44_P226992	0.0353338	0.00375178	0.19637	0.467081	0.620557	0.735998	1.21524	XM_341753	XM_341753	Rattus norvegicus similar to transcription factor 1 (LOC361475), mRNA [XM_341753]	XM_341753	FALSE
A_44_P333495	0.0124563	0.000543409	-0.175772	-0.0171918	0.537451	0.645492	0.989079	XR_005604	LOC303810	PREDICTED: Rattus norvegicus similar to ribosomal protein L15 (LOC303810), mRNA [XR_005604]	XR_005604	FALSE
A_44_P898943	0.040835	0.00492696	0.0119542	-0.82102	-0.606477	-0.919542	-1.80567	TC581852	TC581852			FALSE
A_43_P15145	0.0125566	0.000554315	-0.205636	-0.119764	0.241645	0.546727	1.12473	TC614482	TC614482			FALSE
A_44_P442169	0.0301712	0.00287559	-0.184828	0.122789	0.420322	0.637834	0.551453	NM_001013034	Glrx2	Rattus norvegicus glutaredoxin 2 (thioltransferase) (Glrx2), mRNA [NM_001013034]	NM_001013034	FALSE
A_44_P527610	0.0311897	0.00307378	-0.384413	-0.0297967	0.309347	0.345944	0.534181	ENSRNOT00000059696	ENSRNOT00000059696	Tumor necrosis factor receptor type 1 associated death domain-like protein (Fragment). [Source:Uniprot/SPTREMBL;Acc:Q8K3Z8] [ENSRNOT00000059696]		FALSE
A_44_P990043	0.0394445	0.00458456	0.114039	-0.15024	0.0545199	0.320771	1.17434	ENSRNOT00000027521	Pdcd11_predicted	PREDICTED: Rattus norvegicus programmed cell death protein 11 (predicted) (Pdcd11_predicted), mRNA [XM_219966]		FALSE
A_44_P222786	0.043671	0.00551496	0.178671	0.303961	0.338234	0.0535168	-1.31713	XM_001076141	RGD1563296_predicted	PREDICTED: Rattus norvegicus similar to component of oligomeric golgi complex 5 isoform 1 (predicted) (RGD1563296_predicted), mRNA [XM_001076141]	XM_001076141	FALSE
A_44_P106014	0.00921992	0.000290938	0.26004	0.872161	0.78466	0.577847	-1.22259	ENSRNOT00000022941	Cetn2	Centrosomal protein centrin 2 (Fragment). [Source:Uniprot/SPTREMBL;Acc:Q99MJ7] [ENSRNOT00000022941]		FALSE
A_42_P654166	0.0465945	0.00619386	0.150908	0.26686	0.482999	0.766236	0.876102	ENSRNOT00000020575	RGD1304593_predicted	PREDICTED: Rattus norvegicus similar to expressed sequence C77668 (predicted) (RGD1304593_predicted), mRNA [XM_342288]		FALSE
A_43_P12384	0.00814469	0.000221449	-0.389815	0.195255	0.253422	0.176458	0.626	NM_023987	Birc3	Rattus norvegicus baculoviral IAP repeat-containing 3 (Birc3), mRNA [NM_023987]	NM_023987	FALSE
A_44_P159326	0.0433391	0.00544658	0.571441	0.175365	0.0869963	0.357951	0.640408	XM_343667	XM_343667	Rattus norvegicus similar to AW046014 protein (LOC363328), mRNA [XM_343667]	XM_343667	FALSE
A_44_P367680	0.042052	0.00518161	-0.0822916	-0.184892	0.0258413	-0.0126467	1.03748	NM_017213	Odf2	Rattus norvegicus outer dense fiber of sperm tails 2 (Odf2), mRNA [NM_017213]	NM_017213	FALSE
A_44_P242397	0.00253917	1.07483e-05	1.25872	0.981078	0.184253	-0.201396	-2.14519	NM_022209	Ppp2r2b	Rattus norvegicus protein phosphatase 2 (formerly 2A), regulatory subunit B (PR 52), beta isoform (Ppp2r2b), mRNA [NM_022209]	NM_022209	FALSE
A_42_P841987	0.0085901	0.000244098	0.305955	0.488061	0.130466	-0.253656	-0.375877	NM_022186	Nrbf2	Rattus norvegicus nuclear receptor binding factor 2 (Nrbf2), mRNA [NM_022186]	NM_022186	FALSE
A_42_P512460	0.00772366	0.000194305	0.0478735	-0.078048	0.12185	0.554774	1.87565	NM_001037348	MGC125271	Rattus norvegicus JTV1 (MGC125271), mRNA [NM_001037348]	NM_001037348	FALSE
A_44_P191838	0.00253917	1.03477e-05	-0.303829	-0.474358	-0.11418	0.197459	0.809562	ENSRNOT00000008079	ENSRNOT00000008079	Guanine nucleotide regulatory protein (Fragment). [Source:Uniprot/SPTREMBL;Acc:Q99MC4] [ENSRNOT00000008079]		FALSE
A_44_P1039678	0.0025923	1.32961e-05	-0.0733374	0.287586	0.643645	1.11189	2.06749	ENSRNOT00000002308	Rda279	Rattus norvegicus cDNA clone IMAGE:7304464, with apparent retained intron [BC089907]		FALSE
A_44_P208091	0.0446814	0.00574881	0.0287179	0.264501	0.278713	0.567184	1.41361	NM_001009652	Zfp622	Rattus norvegicus zinc finger protein 622 (Zfp622), mRNA [NM_001009652]	NM_001009652	FALSE
A_44_P441434	0.0214292	0.00155495	-0.777691	0.208685	1.00865	1.27965	1.01481	NM_131914	Cav2	Rattus norvegicus caveolin 2 (Cav2), mRNA [NM_131914]	NM_131914	FALSE
A_43_P11215	0.0168057	0.000992798	0.0641904	0.122873	0.525067	0.840697	1.00808	ENSRNOT00000017708	Pdcd5_predicted	PREDICTED: Rattus norvegicus programmed cell death 5 (predicted) (Pdcd5_predicted), mRNA [XM_214911]		FALSE
A_44_P396382	0.00639543	0.000132635	0.253262	-0.0686046	0.266332	0.582396	1.42903	ENSRNOT00000014629	ENSRNOT00000014629	similar to exosome component 10 (LOC313707), mRNA [Source:RefSeq_dna;Acc:XR_007065] [ENSRNOT00000014629]		FALSE
A_44_P158420	0.00222533	4.18637e-06	0.0626498	0.144668	0.887772	1.19343	2.11415	NM_199099	Impdh2	Rattus norvegicus inosine 5-monophosphate dehydrogenase 2 (Impdh2), mRNA [NM_199099]	NM_199099	FALSE
A_42_P799390	0.0166154	0.000967359	0.452826	0.332126	-0.00300807	-0.308269	-0.763028	NM_001033757	Cdkn1c	Rattus norvegicus cyclin-dependent kinase inhibitor 1C (P57) (Cdkn1c), transcript variant 1, mRNA [NM_001033757]	NM_001033757	FALSE
A_44_P268893	0.0273029	0.00241208	0.206868	-0.237738	-0.00820756	-0.429107	-1.55737	CF110587	CF110587	Shultzomica03838 Rat lung airway and parenchyma cDNA libraries Rattus norvegicus cDNA clone Contig3403 5', mRNA sequence [CF110587]	CF110587	FALSE
A_44_P958139	0.0243971	0.00198635	0.0580119	0.818802	1.02549	0.720041	-0.258177	CO387496	CO387496	AGENCOURT_26621423 NIH_MGC_253 Rattus norvegicus cDNA clone IMAGE:7304629 5', mRNA sequence [CO387496]	CO387496	FALSE
A_44_P525281	0.0215178	0.00156876	0.216361	-0.645675	-0.645245	-0.894092	-1.62505	ENSRNOT00000038251	RGD1561296_predicted	PREDICTED: Rattus norvegicus similar to urocanase domain containing 1 (LOC679756), mRNA [XM_001054337]		FALSE
A_42_P693316	0.00790266	0.000204468	0.531592	0.704562	0.461092	0.325601	-0.407664	NM_024157	Cfi	Rattus norvegicus complement factor I (Cfi), mRNA [NM_024157]	NM_024157	FALSE
A_44_P620665	0.0111457	0.000430239	-0.264241	0.113678	0.507897	0.744871	0.823961	XM_343253	RGD1305976_predicted	PREDICTED: Rattus norvegicus similar to RIKEN cDNA C920006C10 (predicted) (RGD1305976_predicted), mRNA [XM_343253]	XM_343253	FALSE
A_42_P490576	0.0426192	0.00529016	0.0853174	0.796027	0.655793	0.578266	0.282271	XM_220600	Cntrob_predicted	PREDICTED: Rattus norvegicus centrobin, centrosomal BRCA2 interacting protein (predicted) (Cntrob_predicted), mRNA [XM_220600]	XM_220600	FALSE
A_44_P375151	0.0272928	0.00240804	-0.0256987	0.0198302	0.419749	0.544523	0.760418	TC648277	TC648277	RS10_MOUSE (P63325) 40S ribosomal protein S10, partial (82%) [TC648277]		FALSE
A_44_P411796	0.0146872	0.000757915	0.251721	0.937334	0.993377	1.30026	1.80117	NM_001014246	RGD1309482	Rattus norvegicus similar to chromosome 10 open reading frame 4; similar to putative acid phosphatase F26C11.1 (RGD1309482), mRNA [NM_001014246]	NM_001014246	FALSE
A_44_P342671	0.0117422	0.000483121	-0.475405	0.147719	0.896452	1.58672	1.70991	XM_234728	XM_234728	Rattus norvegicus similar to Hspca protein (LOC314540), mRNA [XM_234728]	XM_234728	FALSE
A_43_P21143	0.0256722	0.00212896	-0.431523	0.0094012	0.159948	0.269567	0.394408	ENSRNOT00000021528	Cul3_predicted	PREDICTED: Rattus norvegicus cullin 3 (predicted) (Cul3_predicted), mRNA [XM_217454]		FALSE
A_44_P293357	0.0167292	0.000983808	-0.116103	0.277999	0.395402	0.571145	0.989305	NM_001014098	Ccdc51	Rattus norvegicus coiled-coil domain containing 51 (Ccdc51), mRNA [NM_001014098]	NM_001014098	FALSE
A_44_P320799	0.0230836	0.00178372	0.0160259	-0.442395	-0.365829	-0.993111	-0.850878	NM_017090	Gucy1a3	Rattus norvegicus guanylate cyclase 1, soluble, alpha 3 (Gucy1a3), mRNA [NM_017090]	NM_017090	FALSE
A_44_P1036430	0.0135003	0.000650559	0.42122	0.333083	0.501683	1.04914	1.65494	NM_001008301	Usp14	Rattus norvegicus ubiquitin specific protease 14 (Usp14), mRNA [NM_001008301]	NM_001008301	FALSE
A_44_P316273	0.0381962	0.00432006	0.0971381	0.512854	0.783021	0.986871	0.876429	A_44_P316273	A_44_P316273			FALSE
A_44_P108304	0.0107586	0.000399171	-0.324896	0.23974	0.547816	0.956363	1.14943	XM_343191	Slc41a2_predicted	PREDICTED: Rattus norvegicus solute carrier family 41, member 2 (predicted) (Slc41a2_predicted), mRNA [XM_343191]	XM_343191	FALSE
A_43_P15154	0.0186079	0.00121679	0.555164	0.45368	0.609364	0.256608	-0.496194	XM_576589	Ihh	PREDICTED: Rattus norvegicus Indian hedgehog homolog, (Drosophila) (Ihh), mRNA [XM_576589]	XM_576589	FALSE
A_44_P575750	0.00274976	1.53396e-05	0.00434423	-0.205212	0.20411	1.02482	2.20364	A_44_P575750	A_44_P575750			FALSE
A_42_P648200	0.00478449	6.04061e-05	-0.205627	0.311712	0.199128	0.62101	2.35218	NM_001037356	MGC125015	Rattus norvegicus similar to PAK/PLC-interacting protein 1 (MGC125015), mRNA [NM_001037356]	NM_001037356	FALSE
A_44_P867698	0.0402352	0.00474768	-0.0923982	0.933791	1.15772	1.64514	1.35047	A_44_P867698	A_44_P867698			FALSE
A_44_P390367	0.0142626	0.000717056	0.536422	0.257707	0.338583	0.0140223	-0.625047	NM_012898	Ahsg	Rattus norvegicus alpha-2-HS-glycoprotein (Ahsg), mRNA [NM_012898]	NM_012898	FALSE
A_44_P1038028	0.0107241	0.000396269	-0.00505728	0.0741968	0.0781476	0.864369	2.90281	NM_181086	Tnfrsf12a	Rattus norvegicus tumor necrosis factor receptor superfamily, member 12a (Tnfrsf12a), mRNA [NM_181086]	NM_181086	FALSE
A_44_P457226	0.0127286	0.000573291	-0.368453	-0.562421	-0.213054	0.0369956	0.724599	ENSRNOT00000023854	Sf3b3_predicted	PREDICTED: Rattus norvegicus splicing factor 3b, subunit 3 (predicted) (Sf3b3_predicted), mRNA [XM_214697]		FALSE
A_44_P215191	0.00794473	0.000208454	-0.050265	-0.0360121	0.271602	0.547358	1.06178	NM_001013061	Aprt_predicted	Rattus norvegicus adenine phosphoribosyl transferase (predicted) (Aprt_predicted), mRNA [NM_001013061]	NM_001013061	FALSE
A_44_P249531	0.0102742	0.000366251	0.1211	0.252232	0.439223	0.707508	1.04088	NM_144746	Ppp2r2d	Rattus norvegicus protein phosphatase 2, regulatory subunit B, delta isoform (Ppp2r2d), mRNA [NM_144746]	NM_144746	FALSE
A_44_P746102	0.0285621	0.0026106	0.0892946	0.313952	0.5027	1.00173	1.43313	TC607346	TC607346			FALSE
A_44_P497144	0.044608	0.00572984	-0.220382	0.227686	0.499048	0.59298	0.740365	XM_234490	LOC314393	PREDICTED: Rattus norvegicus similar to thyroid hormone receptor interactor 11 (LOC314393), mRNA [XM_234490]	XM_234490	FALSE
A_42_P665460	0.0169355	0.00101841	-0.126311	0.0580899	0.547154	0.837059	0.942917	AW144706	AW144706	AW144706 EST290453 Normalized rat ovary, Bento Soares Rattus sp. cDNA clone RGIAI64 5' end similar to metallothionein-I gene transcription activator, mRNA sequence [AW144706]	AW144706	FALSE
A_44_P125069	0.00615325	0.000121167	-0.302489	-0.0802029	-0.0945225	-0.559472	-1.90648	XM_001074013	Trp53inp2	PREDICTED: Rattus norvegicus tumor protein p53 inducible nuclear protein 2 (Trp53inp2), mRNA [XM_001074013]	XM_001074013	FALSE
A_44_P625285	0.0178791	0.00113757	0.381653	0.0543552	0.401904	0.852596	1.51746	BP483351	BP483351	BP483351 Rattus norvegicus pancreatic islet Rattus norvegicus cDNA clone RBC05151 5', mRNA sequence [BP483351]	BP483351	FALSE
A_44_P239306	0.0259751	0.00219705	-0.289096	0.409719	0.417765	0.566011	2.41954	NM_001013863	LOC287938	Rattus norvegicus hypothetical LOC287938 (LOC287938), mRNA [NM_001013863]	NM_001013863	FALSE
A_44_P1000203	0.0123619	0.000530389	0.0898298	0.137298	0.486694	0.673635	0.914856	NM_001031650	Mrpl44	Rattus norvegicus mitochondrial ribosomal protein L44 (Mrpl44), mRNA [NM_001031650]	NM_001031650	FALSE
A_44_P948572	0.0131744	0.000622196	-0.159045	0.0650266	0.360126	0.66789	0.89655	TC624095	TC624095	SYY_AQUAE (O67632) Tyrosyl-tRNA synthetase (Tyrosine--tRNA ligase) (TyrRS) , partial (5%) [TC624095]		FALSE
A_44_P1001301	0.0331964	0.00342256	0.0364916	0.363404	0.560971	0.616836	0.722485	NM_001004223	Eef1g	Rattus norvegicus eukaryotic translation elongation factor 1 gamma (Eef1g), mRNA [NM_001004223]	NM_001004223	FALSE
A_44_P1036685	0.0122393	0.000522516	0.0407627	-0.122851	0.402314	0.648619	1.1502	NM_001029900	Mrpl12	Rattus norvegicus ribosomal protein, mitochondrial, L12 (Mrpl12), mRNA [NM_001029900]	NM_001029900	FALSE
A_43_P18091	0.0163052	0.000931554	0.146023	0.254673	0.486258	0.810603	1.63849	NM_001007707	Brp16	Rattus norvegicus brain protein 16 (Brp16), mRNA [NM_001007707]	NM_001007707	FALSE
A_43_P16642	0.0076944	0.000188059	-0.269854	-0.0937671	0.132189	0.261273	0.653299	NM_001009419	Cmas	Rattus norvegicus cytidine monophospho-N-acetylneuraminic acid synthetase (Cmas), mRNA [NM_001009419]	NM_001009419	FALSE
A_42_P828757	0.0315542	0.00315896	-0.23036	-0.0299008	0.294094	0.593707	0.484202	NM_053785	Tm4sf4	Rattus norvegicus transmembrane 4 superfamily member 4 (Tm4sf4), mRNA [NM_053785]	NM_053785	FALSE
A_44_P504133	0.00151364	1.67982e-06	0.0149281	0.447558	-0.10316	-0.739932	-3.46038	ENSRNOT00000032108	RGD1312038_predicted	PREDICTED: Rattus norvegicus similar to putative protein, with at least 6 transmembrane domains, of ancient origin (58.5 kD) (3N884) (predicted) (RGD1312038_predicted), mRNA [XM_343054]		FALSE
A_44_P188606	0.00963502	0.000312263	0.100884	0.185421	-0.0631442	-0.376652	-1.67144	NM_001013157	Nnt	Rattus norvegicus nicotinamide nucleotide transhydrogenase (Nnt), mRNA [NM_001013157]	NM_001013157	FALSE
A_42_P562435	0.0418583	0.00513093	0.0396177	0.208978	0.331844	0.502906	0.896721	NM_001037978	Gtl3	Rattus norvegicus gene trap locus 3 (Gtl3), mRNA [NM_001037978]	NM_001037978	FALSE
A_44_P252922	0.00985541	0.000329414	0.0526109	0.0741008	0.237328	0.31758	1.08088	BC098824	Sec23ip	Rattus norvegicus SEC23 interacting protein, mRNA (cDNA clone IMAGE:7377967), complete cds. [BC098824]	BC098824	FALSE
A_44_P273989	0.0159466	0.000875665	-0.25537	0.276515	0.267678	0.548042	0.976263	NM_017039	Ppp2ca	Rattus norvegicus protein phosphatase 2 (formerly 2A), catalytic subunit, alpha isoform (Ppp2ca), mRNA [NM_017039]	NM_017039	FALSE
A_44_P102774	0.0144356	0.000733306	0.102604	0.0027231	-0.102544	0.178155	1.42597	ENSRNOT00000040963	Polr3e_predicted	PREDICTED: Rattus norvegicus polymerase (RNA) III (DNA directed) polypeptide E (predicted) (Polr3e_predicted), mRNA [XM_341919]		FALSE
A_44_P1057585	0.00727079	0.000169169	0.151216	0.37351	0.700009	1.12163	1.97263	ENSRNOT00000036258	Htatip2_predicted	PREDICTED: Rattus norvegicus HIV-1 tat interactive protein 2, homolog (human) (predicted) (Htatip2_predicted), mRNA [XM_214927]		FALSE
A_44_P233080	0.00633533	0.000128821	2.58389	0.597419	0.484633	-0.109275	-0.00441951	NM_012551	Egr1	Rattus norvegicus early growth response 1 (Egr1), mRNA [NM_012551]	NM_012551	FALSE
A_44_P128747	0.0433438	0.00545411	1.29539	0.414212	-0.513189	0.182034	0.120895	XM_343745	XM_343745	Rattus norvegicus similar to RIKEN cDNA 1700081O22 (LOC363422), mRNA [XM_343745]	XM_343745	FALSE
A_44_P534791	0.0215865	0.00157812	-0.630281	0.302939	0.32547	0.507095	1.35591	ENSRNOT00000008140	Mettl2_predicted	PREDICTED: Rattus norvegicus methyltransferase like 2 (predicted) (Mettl2_predicted), mRNA [XM_343972]		FALSE
A_44_P638274	0.0135962	0.000662435	0.182678	0.348452	0.0700374	-0.181622	-1.69565	TC590186	TC590186			FALSE
A_44_P471426	0.00253917	1.18529e-05	-0.184956	-0.01499	0.292663	0.837128	1.84587	NM_001012204	Traf3ip1	Rattus norvegicus TNF receptor-associated factor 3 interacting protein 1 (Traf3ip1), mRNA [NM_001012204]	NM_001012204	FALSE
A_44_P359032	0.00485073	6.57194e-05	0.735508	0.347423	0.20585	-0.0772722	-0.650437	ENSRNOT00000020820	Pink1_predicted	PREDICTED: Rattus norvegicus PTEN induced putative kinase 1 (predicted) (Pink1_predicted), mRNA [XM_216565]		FALSE
A_44_P427560	0.0179475	0.00114902	-0.0058378	-0.131751	0.169696	0.206534	0.802655	NM_053622	Pom121	Rattus norvegicus nuclear pore membrane glycoprotein 121 (Pom121), mRNA [NM_053622]	NM_053622	FALSE
A_44_P233557	0.0381962	0.00431513	0.460193	0.234976	0.742331	0.162056	-0.580883	NM_182669	RSB-11-77	Rattus norvegicus RSB-11-77 protein (RSB-11-77), mRNA [NM_182669]	NM_182669	FALSE
A_44_P107634	0.0160326	0.000883808	-0.476019	-0.269034	0.150515	0.464108	0.555725	NM_001013995	RGD1305288	Rattus norvegicus similar to chromosome 14 open reading frame 94 (RGD1305288), mRNA [NM_001013995]	NM_001013995	FALSE
A_44_P541461	0.0335628	0.00347754	1.54094	-0.0478801	0.0916406	0.455737	0.652256	NM_013197	Alas2	Rattus norvegicus aminolevulinic acid synthase 2 (Alas2), mRNA [NM_013197]	NM_013197	FALSE
A_44_P254144	0.0149723	0.000795057	0.0934455	0.083155	0.218603	0.291176	1.0615	ENSRNOT00000056944	RGD1311920_predicted	PREDICTED: Rattus norvegicus similar to RIKEN cDNA 9130023F12 gene (predicted) (RGD1311920_predicted), mRNA [XM_223651]		FALSE
A_42_P689873	0.0433028	0.00543625	-0.275364	0.0557698	0.485613	0.559132	0.821726	NM_198754	Cmtm8	Rattus norvegicus CKLF-like MARVEL transmembrane domain containing 8 (Cmtm8), mRNA [NM_198754]	NM_198754	FALSE
A_44_P548025	0.0418315	0.00512541	-0.0233407	0.409969	0.747215	0.84485	0.562558	NM_053876	Hnrpm	Rattus norvegicus heterogeneous nuclear ribonucleoprotein M (Hnrpm), mRNA [NM_053876]	NM_053876	FALSE
A_42_P619308	0.0401206	0.00471118	-0.0174106	-0.0232121	0.230798	0.377566	0.685998	NM_198756	Mrps18a	Rattus norvegicus mitochondrial ribosomal protein S18A (Mrps18a), mRNA [NM_198756]	NM_198756	FALSE
A_44_P368320	0.0111472	0.000434847	0.110426	0.137213	-0.113316	-0.346987	-0.925908	BC106025	LOC362665	Rattus norvegicus similar to KIAA0833 protein, mRNA (cDNA clone IMAGE:7386266), complete cds. [BC106025]	BC106025	FALSE
A_44_P808496	0.00646459	0.000134887	0.158311	0.699618	0.977815	1.29549	2.10958	XM_231787	RGD1562590_predicted	PREDICTED: Rattus norvegicus similar to hypothetical protein (predicted) (RGD1562590_predicted), mRNA [XM_231787]	XM_231787	FALSE
A_44_P314312	0.0189356	0.00126306	-0.761186	-0.663083	-0.307694	-0.209161	1.25034	ENSRNOT00000013535	Nol9	Nol9 protein (Fragment). [Source:Uniprot/SPTREMBL;Acc:Q4G021] [ENSRNOT00000013535]		FALSE
A_44_P393605	0.0202251	0.00140924	-0.234521	0.199437	0.401779	0.74337	1.11906	NM_133615	Taf9l	Rattus norvegicus TAF9-like RNA polymerase II, TATA box binding protein (TBP)-associated factor, 31kDa (Taf9l), mRNA [NM_133615]	NM_133615	FALSE
A_43_P13277	0.0382189	0.00433342	0.292027	0.421351	0.744243	0.91557	1.13769	NM_134458	Psmc3ip	Rattus norvegicus proteasome (prosome, macropain) 26S subunit, ATPase 3, interacting protein (Psmc3ip), mRNA [NM_134458]	NM_134458	FALSE
A_44_P1049532	0.00666435	0.000142256	-0.219434	0.00323564	0.372239	0.724894	1.14928	NM_001024974	RGD1311863	Rattus norvegicus similar to RIKEN cDNA 2410127L17 (RGD1311863), mRNA [NM_001024974]	NM_001024974	FALSE
A_43_P15356	0.0353997	0.00376544	-0.457194	-0.375593	-0.132703	0.105708	0.86989	NM_131904	Mgea5	Rattus norvegicus meningioma expressed antigen 5 (hyaluronidase) (Mgea5), mRNA [NM_131904]	NM_131904	FALSE
A_44_P453543	0.0180736	0.00116221	-0.143146	0.101104	0.376458	0.58283	0.972544	NM_001014248	RGD1308127	Rattus norvegicus similar to 2700078E11Rik protein (RGD1308127), mRNA [NM_001014248]	NM_001014248	FALSE
A_43_P16436	0.049143	0.00674609	-0.689849	0.0453599	0.305791	0.0770412	-0.75229	ENSRNOT00000016100	RGD1566282_predicted	Rattus norvegicus similar to hypothetical protein FLJ23516; gene related to anergy in lymphocytes (LOC315911), mRNA [XM_236533]		FALSE
A_44_P225493	0.00510944	8.01631e-05	-0.255495	-0.0828667	0.0481048	0.331264	0.778187	NM_145184	Usp15	Rattus norvegicus ubiquitin specific peptidase 15 (Usp15), mRNA [NM_145184]	NM_145184	FALSE
A_44_P481525	0.0311029	0.0030507	-0.253448	0.11002	0.373329	0.564735	0.867701	NM_020075	Eif5	Rattus norvegicus eukaryotic translation initiation factor 5 (Eif5), mRNA [NM_020075]	NM_020075	FALSE
A_44_P490107	0.0113016	0.000446298	0.0223114	0.374567	0.964663	1.31989	1.91014	A_44_P490107	A_44_P490107			FALSE
A_44_P519871	0.0145159	0.000741326	-0.125797	-0.0375854	-0.331149	-0.826443	-2.26139	NM_017070	Srd5a1	Rattus norvegicus steroid 5 alpha-reductase 1 (Srd5a1), mRNA [NM_017070]	NM_017070	FALSE
A_42_P513025	0.00151364	1.64499e-06	0.413637	0.89239	0.283277	-0.37909	-1.82438	XM_343394	Znf291	PREDICTED: Rattus norvegicus zinc finger protein 291 (Znf291), mRNA [XM_343394]	XM_343394	FALSE
A_42_P589201	0.0367211	0.0040172	-1.41466	0.217893	-0.0356204	0.446234	0.844387	NM_144758	Slc15a4	Rattus norvegicus solute carrier family 15, member 4 (Slc15a4), mRNA [NM_144758]	NM_144758	FALSE
A_44_P972303	0.0166586	0.000976101	0.145085	0.0915846	0.485813	0.802588	2.03679	AW916976	AW916976	AW916976 EST348280 Rat gene index, normalized rat, norvegicus, Bento Soares Rattus norvegicus cDNA clone RGIDX44 5' end, mRNA sequence [AW916976]	AW916976	FALSE
A_44_P409654	0.00976589	0.000321802	0.285797	0.728573	0.413024	0.0213368	-1.13678	NM_012816	Amacr	Rattus norvegicus alpha-methylacyl-CoA racemase (Amacr), mRNA [NM_012816]	NM_012816	FALSE
A_43_P17072	0.0357438	0.00383548	-0.826471	-0.378479	-0.259892	-0.01954	0.535389	NM_001012040	Samd8	Rattus norvegicus sterile alpha motif domain containing 8 (Samd8), mRNA [NM_001012040]	NM_001012040	FALSE
A_44_P365531	0.0317442	0.00318306	-0.112351	0.381192	0.240158	0.0878758	-1.14833	NM_024392	Hsd17b4	Rattus norvegicus hydroxysteroid (17-beta) dehydrogenase 4 (Hsd17b4), mRNA [NM_024392]	NM_024392	FALSE
A_44_P361504	0.0269093	0.00235362	-0.0956227	0.372164	0.84145	0.965577	1.18572	ENSRNOT00000036109	RGD1559667_predicted	PREDICTED: Rattus norvegicus similar to basic transcription factor 3 (predicted) (predicted) (RGD1559667_predicted), mRNA [XM_573106]		FALSE
A_44_P760697	0.00677953	0.000146006	0.0456027	-0.0705143	-0.0658489	0.256735	1.90805	NM_001014217	LOC363251	Rattus norvegicus similar to 1700029B21Rik protein (LOC363251), mRNA [NM_001014217]	NM_001014217	FALSE
A_44_P453297	0.0477878	0.00644685	-0.444062	0.129711	0.396373	0.586599	0.657607	NM_001009602	Actr10	Rattus norvegicus ARP10 actin-related protein 10 homolog (S. cerevisiae) (Actr10), mRNA [NM_001009602]	NM_001009602	FALSE
A_44_P552118	0.0153403	0.000821905	-0.0807923	-0.088024	0.27499	0.465661	0.697241	ENSRNOT00000013331	Cnih_predicted	PREDICTED: Rattus norvegicus cornichon homolog (Drosophila) (predicted) (Cnih_predicted), mRNA [XM_214153]		FALSE
A_44_P476136	0.026161	0.00223092	0.0404607	-0.0323144	0.124503	0.467327	0.928164	XM_340750	Alg1_predicted	PREDICTED: Rattus norvegicus asparagine-linked glycosylation 1 homolog (yeast, beta-1,4-mannosyltransferase) (predicted) (Alg1_predicted), mRNA [XM_340750]	XM_340750	FALSE
A_44_P288481	0.0213575	0.00154689	-0.489263	-0.0647311	-0.365484	0.0402027	1.42707	ENSRNOT00000037142	Heatr1_predicted	PREDICTED: Rattus norvegicus HEAT repeat containing 1 (predicted) (Heatr1_predicted), mRNA [XM_341546]		FALSE
A_44_P215602	0.0279525	0.002509	-0.29728	0.242578	0.647298	0.747092	0.337846	XR_007178	LOC294396	PREDICTED: Rattus norvegicus similar to 60 kDa heat shock protein, mitochondrial precursor (Hsp60) (60 kDa chaperonin) (CPN60) (Heat shock protein 60) (HSP-60) (Mitochondrial matrix protein P1) (HSP-65) (LOC294396), mRNA [XR_007178]	XR_007178	FALSE
A_42_P741027	0.044953	0.00581253	-0.359603	0.160987	0.471167	0.558217	1.07765	NM_021835	Jun	Rattus norvegicus Jun oncogene (Jun), mRNA [NM_021835]	NM_021835	FALSE
A_44_P339862	0.0262814	0.00225662	-0.603625	0.0062629	0.293641	0.328018	0.491829	ENSRNOT00000017280	Mrpl3_predicted	Mitochondrial 39S ribosomal protein L3 (L3mt) (MRP-L3). [Source:Uniprot/SWISSPROT;Acc:P18665] [ENSRNOT00000017280]		FALSE
A_43_P19879	0.00222533	5.58143e-06	1.22425	0.64197	-0.272189	-0.495051	-2.46291	ENSRNOT00000042872	ENSRNOT00000042872	PREDICTED: Rattus norvegicus similar to osteoclast inhibitory lectin (LOC689770), mRNA [XM_001071945]		FALSE
A_44_P469863	0.0115642	0.000470862	-0.217932	-0.119786	-0.125184	-0.443784	-1.56824	NM_012596	Lepr	Rattus norvegicus leptin receptor (Lepr), mRNA [NM_012596]	NM_012596	FALSE
A_44_P563598	0.0183503	0.00118588	0.498177	0.63692	0.462946	0.0967641	-1.22396	TC622805	TC622805			FALSE
A_43_P16827	0.0188789	0.00124788	0.10147	0.663127	0.653376	0.966249	1.77183	XM_216815	RGD1306332_predicted	PREDICTED: Rattus norvegicus similar to HCV NS3-transactivated protein 1 (predicted) (RGD1306332_predicted), mRNA [XM_216815]	XM_216815	FALSE
A_44_P622216	0.00481519	6.27517e-05	0.041861	0.692169	0.833761	1.23405	1.80799	XM_235940	Snx19_predicted	PREDICTED: Rattus norvegicus sorting nexin 19 (predicted) (Snx19_predicted), mRNA [XM_235940]	XM_235940	FALSE
A_43_P12409	0.00565604	0.000102019	-0.864663	-0.194687	-0.0238019	0.406367	0.60444	NM_024155	Anxa4	Rattus norvegicus annexin A4 (Anxa4), mRNA [NM_024155]	NM_024155	FALSE
A_44_P363742	0.0076944	0.000186067	0.221049	0.126803	0.275546	0.600384	1.28817	XM_233883	Slc4a1ap_predicted	PREDICTED: Rattus norvegicus solute carrier family 4 (anion exchanger), member 1, adaptor protein (predicted) (Slc4a1ap_predicted), mRNA [XM_233883]	XM_233883	FALSE
A_44_P1030201	0.0467179	0.00621775	0.418638	0.137943	0.181221	0.494133	0.927433	XM_234416	RGD1564946_predicted	PREDICTED: Rattus norvegicus similar to YLP motif containing protein 1 (Nuclear protein ZAP3) (ZAP113) (predicted) (RGD1564946_predicted), mRNA [XM_234416]	XM_234416	FALSE
A_44_P971455	0.0258726	0.00216353	0.163375	-0.09104	0.314833	0.60717	1.0037	DV722752	DV722752	RVL14408 Wackym-Soares normalized rat vestibular cDNA library Rattus norvegicus cDNA 5', mRNA sequence [DV722752]	DV722752	FALSE
A_44_P1056161	0.00824456	0.0002285	0.310901	0.825791	0.635217	0.118059	-0.239368	NM_031976	Prkab1	Rattus norvegicus protein kinase, AMP-activated, beta 1 non-catalytic subunit (Prkab1), mRNA [NM_031976]	NM_031976	FALSE
A_44_P386799	0.0376125	0.00421908	0.218669	0.679957	0.836773	1.04515	1.69473	NM_001006991	Nudt9	Rattus norvegicus nudix (nucleoside diphosphate linked moiety X)-type motif 9 (Nudt9), mRNA [NM_001006991]	NM_001006991	FALSE
A_44_P667382	0.0270201	0.0023689	-0.372789	0.0191598	0.117725	0.374349	1.07033	ENSRNOT00000005432	ENSRNOT00000005432			FALSE
A_44_P269078	0.00222533	4.36066e-06	-0.206732	0.0027467	0.601446	0.946344	1.36958	NM_012670	Tcp1	Rattus norvegicus t-complex protein 1 (Tcp1), mRNA [NM_012670]	NM_012670	FALSE
A_44_P239331	0.00439764	4.95171e-05	1.88489	1.51811	0.534959	-0.54854	-1.62579	BF398399	BF398399	BF398399 UI-R-BS2-beo-d-06-0-UI.s1 UI-R-BS2 Rattus norvegicus cDNA clone UI-R-BS2-beo-d-06-0-UI 3', mRNA sequence [BF398399]	BF398399	FALSE
A_44_P433431	0.0407293	0.00488604	0.355017	-0.11153	0.153415	0.350813	0.852709	ENSRNOT00000045512	ENSRNOT00000045512	Histone H2A type 1-E. [Source:Uniprot/SWISSPROT;Acc:P0C170] [ENSRNOT00000045512]		FALSE
A_44_P400202	0.0141548	0.000707023	0.516744	0.678005	0.465537	0.270242	-0.373662	NM_130826	Hadha	Rattus norvegicus hydroxyacyl-Coenzyme A dehydrogenase/3-ketoacyl-Coenzyme A thiolase/enoyl-Coenzyme A hydratase (trifunctional protein), alpha subunit (Hadha), mRNA [NM_130826]	NM_130826	FALSE
A_44_P1014818	0.00284077	1.92287e-05	-0.305572	0.0423966	0.25024	0.545598	0.96441	XM_213712	Pms2_predicted	PREDICTED: Rattus norvegicus postmeiotic segregation increased 2 (S. cerevisiae) (predicted) (Pms2_predicted), mRNA [XM_213712]	XM_213712	FALSE
A_44_P173211	0.0260113	0.00220428	-0.0846388	0.677682	0.635166	1.00651	2.06635	NM_001037183	Mrpl47	Rattus norvegicus mitochondrial ribosomal protein L47 (Mrpl47), mRNA [NM_001037183]	NM_001037183	FALSE
A_44_P212708	0.00598692	0.000112959	0.590826	0.0682693	0.290755	0.700202	1.24389	NM_031331	Psmd4	Rattus norvegicus proteasome (prosome, macropain) 26S subunit, non-ATPase, 4 (Psmd4), mRNA [NM_031331]	NM_031331	FALSE
A_44_P435703	0.0460409	0.00608587	0.166285	0.737978	0.684664	0.708272	0.860595	NM_001004268	RGD1303271	Rattus norvegicus similar to chromosome 1 open reading frame 172 (RGD1303271), mRNA [NM_001004268]	NM_001004268	FALSE
A_44_P285803	0.0161923	0.00091428	-0.18707	-0.121066	0.408281	0.404243	0.662126	NM_138892	Rs21c6	Rattus norvegicus RS21-C6 protein (Rs21c6), mRNA [NM_138892]	NM_138892	FALSE
A_44_P158709	0.0453766	0.00590363	0.297361	0.64005	0.802366	0.925718	1.29122	NM_212497	Dom3z	Rattus norvegicus DOM-3 homolog Z (C. elegans) (Dom3z), mRNA [NM_212497]	NM_212497	FALSE
A_44_P1006624	0.00970048	0.000315774	0.0329057	0.0163457	0.15943	0.236764	0.924046	ENSRNOT00000035905	LOC362683	LOC362683 protein (Fragment). [Source:Uniprot/SPTREMBL;Acc:Q6AXS6] [ENSRNOT00000035905]		FALSE
A_44_P1051965	0.0398408	0.00466251	0.11936	0.427468	0.779219	0.922283	0.772994	NM_053877	D123	Rattus norvegicus D123 gene product (D123), mRNA [NM_053877]	NM_053877	FALSE
A_44_P240819	0.00719293	0.000164287	0.252742	0.17245	0.164736	0.0176706	-0.5102	AY310157	RGD1311563	Rattus norvegicus Ac1573 mRNA, complete cds. [AY310157]	AY310157	FALSE
A_44_P199096	0.00253917	9.38565e-06	-0.209283	0.283398	-0.0963351	-0.301426	-1.37212	NM_001014790	Rarres1	Rattus norvegicus retinoic acid receptor responder (tazarotene induced) 1 (Rarres1), mRNA [NM_001014790]	NM_001014790	FALSE
A_43_P11377	0.00985541	0.000330577	0.0416744	0.396363	0.604684	0.749329	1.26986	ENSRNOT00000027818	Pin1_predicted	PREDICTED: Rattus norvegicus protein (peptidyl-prolyl cis [XM_216609]		FALSE
A_43_P10709	0.0278747	0.00249458	0.197483	0.757289	1.01264	0.713656	-0.12278	XM_215728	Smarca3_predicted	PREDICTED: Rattus norvegicus SWI [XM_215728]	XM_215728	FALSE
A_44_P794680	0.0366389	0.00400017	0.0218508	-0.0140899	0.274964	0.500371	1.06188	TC602727	TC602727	Q8IVS8_HUMAN (Q8IVS8) CG9886-like (Glycerate kinase 1), partial (17%) [TC591018]		FALSE
A_44_P506064	0.00171657	2.5911e-06	0.227253	-0.0946039	-0.371509	-0.976915	-2.08759	ENSRNOT00000059639	Aldh1l2_predicted	PREDICTED: Rattus norvegicus aldehyde dehydrogenase 1 family, member L2 (predicted) (Aldh1l2_predicted), mRNA [XM_235005]		FALSE
A_44_P460973	0.0214779	0.00156428	0.332368	0.602459	0.855638	1.04164	1.62197	AW914768	AW914768	AW914768 EST346072 Normalized rat ovary, Bento Soares Rattus sp. cDNA clone RGIBH05 5' end, mRNA sequence [AW914768]	AW914768	FALSE
A_43_P16750	0.00530977	8.64882e-05	0.935976	1.17665	0.459477	0.196707	-0.604813	XM_001058939	LOC680409	PREDICTED: Rattus norvegicus similar to Proline oxidase, mitochondrial precursor (Proline dehydrogenase), transcript variant 2 (LOC680409), mRNA [XM_001058939]	XM_001058939	FALSE
A_44_P375553	0.0305445	0.00292747	0.646778	0.0600861	-0.365453	-0.648566	-1.2539	ENSRNOT00000031005	Lrp1	Lrp1 protein (Fragment). [Source:Uniprot/SPTREMBL;Acc:Q5I0H1] [ENSRNOT00000031005]		FALSE
A_44_P400211	0.041828	0.00511636	-0.00194609	0.362748	0.272059	0.158175	-0.445029	NM_173116	Sgpl1	Rattus norvegicus sphingosine phosphate lyase 1 (Sgpl1), mRNA [NM_173116]	NM_173116	FALSE
A_44_P273990	0.017681	0.00111527	-0.30691	0.224093	0.240486	0.5559	1.0254	NM_017039	Ppp2ca	Rattus norvegicus protein phosphatase 2 (formerly 2A), catalytic subunit, alpha isoform (Ppp2ca), mRNA [NM_017039]	NM_017039	FALSE
A_44_P426345	0.0146255	0.000752572	0.21989	-0.0705531	-0.49784	-0.698815	-2.04192	NM_017080	Hsd11b1	Rattus norvegicus hydroxysteroid 11-beta dehydrogenase 1 (Hsd11b1), mRNA [NM_017080]	NM_017080	FALSE
A_43_P12964	0.0198748	0.00136713	0.309116	0.273132	0.368125	0.726382	1.12095	NM_053866	Plaa	Rattus norvegicus phospholipase A2, activating protein (Plaa), mRNA [NM_053866]	NM_053866	FALSE
A_43_P16535	0.00305204	2.42678e-05	0.165609	0.195102	0.544836	0.752279	1.14652	XM_213234	Mrps34_predicted	PREDICTED: Rattus norvegicus mitochondrial ribosomal protein S34 (predicted) (Mrps34_predicted), mRNA [XM_213234]	XM_213234	FALSE
A_44_P685971	0.00435314	4.87838e-05	-0.11955	0.277994	0.640275	1.03742	1.4216	NM_001034940	Zcrb1	Rattus norvegicus zinc finger CCHC-type and RNA binding motif 1 (Zcrb1), mRNA [NM_001034940]	NM_001034940	FALSE
A_44_P1013163	0.0049178	7.09673e-05	0.484484	-0.420088	-0.722427	-1.20696	-1.97743	XM_240311	Clybl	PREDICTED: Rattus norvegicus citrate lyase beta like (Clybl), mRNA [XM_240311]	XM_240311	FALSE
A_42_P641082	0.00158159	2.19443e-06	0.0819938	0.209181	-0.649809	-1.13906	-2.51768	NM_199376	Sil1	Rattus norvegicus endoplasmic reticulum chaperone SIL1 homolog (S. cerevisiae) (Sil1), mRNA [NM_199376]	NM_199376	FALSE
A_44_P185138	0.0185515	0.00120878	-0.00545859	0.100417	0.482599	0.570751	0.727251	A_44_P185138	A_44_P185138			FALSE
A_42_P611223	0.0346955	0.00363267	-0.415087	-0.0851948	0.202826	0.466042	0.92412	NM_053899	Cgrrf1	Rattus norvegicus cell growth regulator with ring finger domain 1 (Cgrrf1), mRNA [NM_053899]	NM_053899	FALSE
A_44_P224547	0.00697144	0.000152705	0.491078	1.12206	0.781001	0.00303674	-2.25517	NM_001077641	Plcb1	Rattus norvegicus phospholipase C, beta 1 (Plcb1), mRNA [NM_001077641]	NM_001077641	FALSE
A_44_P153947	0.0130897	0.0006161	0.275886	-0.0859392	-0.169022	-0.726186	-1.83832	NM_001002826	Mug2	Rattus norvegicus murinoglobulin 2 (Mug2), mRNA [NM_001002826]	NM_001002826	FALSE
A_44_P840798	0.0046205	5.47388e-05	-0.180412	-0.223463	-0.0806767	0.294248	1.25201	XM_232735	Eya3_predicted	PREDICTED: Rattus norvegicus eyes absent 3 homolog (Drosophila) (predicted) (Eya3_predicted), mRNA [XM_232735]	XM_232735	FALSE
A_42_P545721	0.0139083	0.000686905	-0.260447	-0.093088	0.399192	0.586066	1.00735	ENSRNOT00000042614	ENSRNOT00000042614	UI-R-E0-cf-h-03-0-UI.r1 UI-R-E0 Rattus norvegicus cDNA clone UI-R-E0-cf-h-03-0-UI 5', mRNA sequence [BF555033]		FALSE
A_44_P128629	0.0117422	0.000482568	-0.322655	0.065874	-0.169665	-0.682218	-1.77103	ENSRNOT00000004570	Gcdh_predicted	Rattus norvegicus similar to glutaryl-CoA dehydrogenase precursor (LOC364975), mRNA [XM_344744]		FALSE
A_44_P523052	0.0494954	0.00681985	0.464419	0.772487	0.677454	0.483813	-0.0599606	ENSRNOT00000001602	Agpat3_predicted	PREDICTED: Rattus norvegicus 1-acylglycerol-3-phosphate O-acyltransferase 3 (predicted) (Agpat3_predicted), mRNA [XM_215367]		FALSE
A_44_P158994	0.0498774	0.00691773	0.0721375	-0.2279	-0.102137	0.589411	1.86763	TC641315	TC641315	RATDBP2 vitamin D-binding protein precursor {Rattus norvegicus} (exp=-1; wgp=0; cg=0), partial (11%) [TC641315]		FALSE
A_44_P718340	0.0125566	0.000557507	-0.169233	0.0208316	0.429725	0.560384	0.795015	TC632099	TC632099	RNU03390 protein kinase C receptor {Rattus norvegicus} (exp=-1; wgp=0; cg=0), partial (20%) [TC632099]		FALSE
A_44_P1025812	0.00330694	2.87652e-05	0.185746	0.227638	0.62498	0.861461	1.28655	XM_001069418	LOC689074	PREDICTED: Rattus norvegicus similar to Protein KIAA1543 (LOC689074), mRNA [XM_001069418]	XM_001069418	FALSE
A_42_P780882	0.00284077	1.86472e-05	-0.0871486	0.210215	0.515681	0.666914	1.65732	ENSRNOT00000028697	Esrra	estrogen related receptor, alpha [Source:RefSeq_peptide;Acc:NP_001008511] [ENSRNOT00000028697]		FALSE
A_43_P10428	0.0141314	0.000704345	0.0666037	0.0603006	0.562862	0.869858	1.3401	ENSRNOT00000000586	ENSRNOT00000000586	PREDICTED: Rattus norvegicus U1 small nuclear ribonucleoprotein 1C (predicted) (Snrp1c_predicted), mRNA [XM_342101]		FALSE
A_43_P11241	0.0179475	0.00114682	0.0478848	-0.020286	0.242858	0.446955	1.19183	ENSRNOT00000055970	ENSRNOT00000055970	Mi-2 autoantigen (Fragment). [Source:Uniprot/SPTREMBL;Acc:O88747] [ENSRNOT00000055970]		FALSE
A_44_P808732	0.00253917	1.05489e-05	0.349098	-0.16419	0.102135	0.272136	0.929656	XM_001075972	LOC687346	PREDICTED: Rattus norvegicus similar to BRCA1-associated protein (BRAP2) (Impedes mitogenic signal propagation) (IMP) (LOC687346), mRNA [XM_001075972]	XM_001075972	FALSE
A_43_P14599	0.0333155	0.00344551	0.172383	0.603111	0.626366	0.761385	1.02654	XM_216872	Nup37_predicted	PREDICTED: Rattus norvegicus nucleoporin 37 (predicted) (Nup37_predicted), mRNA [XM_216872]	XM_216872	FALSE
A_43_P11166	0.0142626	0.000718103	0.252361	0.860133	1.15636	1.36888	1.5946	NM_001008343	RGD1307279	Rattus norvegicus similar to RIKEN cDNA 2700002I20 (RGD1307279), mRNA [NM_001008343]	NM_001008343	FALSE
A_44_P288629	0.0169103	0.00100709	0.0612354	0.842588	0.121559	0.00926757	-1.56949	NM_001077435	LOC363498	Rattus norvegicus similar to brain expressed X-linked protein 2 (LOC363498), mRNA [NM_001077435]	NM_001077435	FALSE
A_44_P595444	0.012991	0.000605218	-0.49425	-0.611976	0.143306	0.527791	0.812956	TC633163	TC633163			FALSE
A_44_P116758	0.0300069	0.00284392	-0.11992	0.331884	0.545003	0.646859	0.495318	NM_001014148	LOC361309	Rattus norvegicus similar to polyadenylate-binding protein-interacting protein 2 (LOC361309), mRNA [NM_001014148]	NM_001014148	FALSE
A_44_P121051	0.0100644	0.000343196	-0.069957	-0.174134	0.384905	0.504399	0.87209	NM_201415	Rpl17	Rattus norvegicus ribosomal protein L17 (Rpl17), mRNA [NM_201415]	NM_201415	FALSE
A_43_P16755	0.0176313	0.00110073	-0.416241	0.281924	0.547005	0.50363	0.47091	NM_001025407	Alg5	Rattus norvegicus asparagine-linked glycosylation 5 homolog (yeast, dolichyl-phosphate beta-glucosyltransferase) (Alg5), mRNA [NM_001025407]	NM_001025407	FALSE
A_44_P200968	0.0370658	0.00410634	-0.400015	0.264728	0.452521	0.679578	1.11424	NM_207604	Tlr6	Rattus norvegicus toll-like receptor 6 (Tlr6), mRNA [NM_207604]	NM_207604	FALSE
A_44_P938669	0.0184231	0.0011965	0.626111	0.288318	0.304405	0.13984	-0.312461	BC127463	Ng3	Rattus norvegicus cDNA clone MGC:156528 IMAGE:8362353, complete cds [BC127463]	BC127463	FALSE
A_44_P618980	0.0259156	0.00217123	-0.877774	-0.113614	0.196936	0.33005	1.06668	AW144417	AW144417	AW144417 EST294713 Normalized rat ovary, Bento Soares Rattus sp. cDNA clone RGICT08 5' end, mRNA sequence [AW144417]	AW144417	FALSE
A_44_P381384	0.0480134	0.00650547	-0.044296	-0.400269	-0.109479	-0.0171044	0.613969	AW143018	AW143018	AW143018 EST293313 Normalized rat brain, Bento Soares Rattus sp. cDNA clone RGIBB71 5' end, mRNA sequence [AW143018]	AW143018	FALSE
A_42_P756652	0.00253917	1.04131e-05	-0.127155	0.0183035	0.49113	0.719022	1.1869	NM_133525	RGD620382	Rattus norvegicus Nucleoside 2-deoxyribosyltransferase domain containing protein RGD620382 (RGD620382), mRNA [NM_133525]	NM_133525	FALSE
A_42_P612834	0.0146255	0.000753159	0.0334897	0.198136	0.453396	0.712577	1.51953	ENSRNOT00000026168	Tmem93_predicted	PREDICTED: Rattus norvegicus transmembrane protein 93 (predicted) (Tmem93_predicted), mRNA [XM_213394]		FALSE
A_42_P771848	0.019053	0.00127924	0.210381	0.377337	0.687593	0.723591	1.11092	NM_001008324	Eif4b	Rattus norvegicus eukaryotic translation initiation factor 4B (Eif4b), mRNA [NM_001008324]	NM_001008324	FALSE
A_44_P318707	0.0138047	0.00067996	0.216682	0.910563	0.506755	0.0595102	-2.22964	XM_344812	RGD1562948_predicted	Rattus norvegicus similar to Acetyl CoA transferase-like (LOC365096), mRNA [XM_344812]	XM_344812	FALSE
A_43_P12270	0.0287661	0.00264698	0.0429829	0.165667	-0.0857418	-0.375978	-1.95379	NM_022629	Bbox1	Rattus norvegicus butyrobetaine (gamma), 2-oxoglutarate dioxygenase 1 (gamma-butyrobetaine hydroxylase) (Bbox1), mRNA [NM_022629]	NM_022629	FALSE
A_44_P368513	0.00786878	0.000201559	-0.328242	-0.363921	0.357189	0.624843	0.653567	BF282682	BF282682	BF282682 EST447273 Rat Gene Index, normalized rat, Rattus norvegicus cDNA Rattus norvegicus cDNA clone RGIDR63 3' sequence, mRNA sequence [BF282682]	BF282682	FALSE
A_44_P1060312	0.0306882	0.0029612	-0.120348	0.600064	0.7596	0.993004	0.890939	NM_001012149	Uchl5	Rattus norvegicus ubiquitin carboxyl-terminal hydrolase L5 (Uchl5), mRNA [NM_001012149]	NM_001012149	FALSE
A_44_P321009	0.0366237	0.00399102	0.398985	0.541424	0.770503	2.73502	3.57176	NM_012540	Cyp1a1	Rattus norvegicus cytochrome P450, family 1, subfamily a, polypeptide 1 (Cyp1a1), mRNA [NM_012540]	NM_012540	FALSE
A_44_P123918	0.00136988	9.71272e-07	-0.361529	-0.13433	0.562747	0.821282	0.968158	ENSRNOT00000036212	Slc35d2_predicted	PREDICTED: Rattus norvegicus solute carrier family 35, member D2 (predicted) (Slc35d2_predicted), mRNA [XM_214408]		FALSE
A_42_P641234	0.0247242	0.00202	-0.317748	-0.356125	0.363867	0.546691	0.932809	NM_001008303	Snrpa	Rattus norvegicus small nuclear ribonucleoprotein polypeptide A (Snrpa), mRNA [NM_001008303]	NM_001008303	FALSE
A_42_P553444	0.0367506	0.0040263	0.480023	0.347026	-0.280809	-0.214888	-1.04859	ENSRNOT00000016164	ENSRNOT00000016164	Proprotein convertase subtilisin/kexin type 5 precursor (EC 3.4.21.-) (Proprotein convertase PC5) (Subtilisin/kexin-like protease PC5) (rPC5) (PC6) (Fragment). [Source:Uniprot/SWISSPROT;Acc:P41413] [ENSRNOT00000016164]		FALSE
A_42_P528580	0.0281621	0.00255098	-0.0523902	0.0616411	0.51226	0.645668	0.680089	ENSRNOT00000016445	Hddc3_predicted	PREDICTED: Rattus norvegicus HD domain containing 3 (predicted) (Hddc3_predicted), mRNA [XM_218817]		FALSE
A_42_P618414	0.0442113	0.00564821	0.0766615	0.674343	0.752851	0.716105	0.420583	XM_217208	Mto1_predicted	PREDICTED: Rattus norvegicus mitochondrial translation optimization 1 homolog (S. cerevisiae) (predicted) (Mto1_predicted), mRNA [XM_217208]	XM_217208	FALSE
A_44_P536097	0.0270972	0.00238105	0.064714	-0.112463	-0.230724	-0.827345	-1.72414	NM_001002826	Mug2	Rattus norvegicus murinoglobulin 2 (Mug2), mRNA [NM_001002826]	NM_001002826	FALSE
A_44_P105476	0.0268259	0.00234346	-0.210194	0.462462	0.513929	0.519898	1.63252	XR_006040	LOC302804	PREDICTED: Rattus norvegicus hypothetical LOC302804 (LOC302804), mRNA [XR_006040]	XR_006040	FALSE
A_44_P988945	0.0386852	0.00444264	0.244269	-0.215326	0.0910108	0.451604	1.446	AA957187	AA957187	AA957187 UI-R-E1-fp-g-10-0-UI.s1 UI-R-E1 Rattus norvegicus cDNA clone UI-R-E1-fp-g-10-0-UI 3', mRNA sequence [AA957187]	AA957187	FALSE
A_42_P517554	0.0460243	0.00607606	0.0191461	0.317625	0.222948	-0.0628869	-0.798121	ENSRNOT00000018394	Polg2_predicted	PREDICTED: Rattus norvegicus polymerase (DNA directed), gamma 2, accessory subunit (predicted) (Polg2_predicted), mRNA [XM_221047]		FALSE
A_43_P10039	0.0367597	0.00403319	-0.174764	0.144087	0.924972	1.06219	1.15966	ENSRNOT00000030559	LOC500420	LOC500420 protein (Fragment). [Source:Uniprot/SPTREMBL;Acc:Q3SWT2] [ENSRNOT00000030559]		FALSE
A_44_P379991	0.0209213	0.00148601	-0.269968	0.0193456	0.28937	0.500834	0.804957	XM_212955	RGD1564400_predicted	PREDICTED: Rattus norvegicus similar to Eukaryotic translation initiation factor 5 (eIF-5) (predicted) (RGD1564400_predicted), mRNA [XM_212955]	XM_212955	FALSE
A_44_P716856	0.0452627	0.00588398	-0.0423915	0.17332	0.750991	1.00577	0.818473	TC631013	TC631013	Q7PCP7_GIALA (Q7PCP7) GLP_414_18752_18162 (GLP_9_1212_622), partial (8%) [TC631013]		FALSE
A_44_P163242	0.00499023	7.52379e-05	-0.568758	-0.0637161	0.682946	1.20185	1.80703	NM_138541	Tacstd1	Rattus norvegicus tumor-associated calcium signal transducer 1 (Tacstd1), mRNA [NM_138541]	NM_138541	FALSE
A_44_P369493	0.0385107	0.00440004	-0.102637	0.0650305	0.317285	0.533364	0.65748	NM_001014067	LOC500528	Rattus norvegicus similar to hypothetical protein FLJ33084 (LOC500528), mRNA [NM_001014067]	NM_001014067	FALSE
A_42_P619248	0.02729	0.00240393	-0.198674	0.308621	0.292801	0.146075	-0.735191	XM_001053199	RGD1560511_predicted	PREDICTED: Rattus norvegicus similar to Vps41 protein (predicted) (RGD1560511_predicted), mRNA [XM_001053199]	XM_001053199	FALSE
A_44_P191309	0.0320088	0.00322497	0.488887	-0.070846	-0.028113	-0.186049	-0.889488	ENSRNOT00000005863	Lpin1	lipin 1 [Source:RefSeq_peptide;Acc:NP_001012111] [ENSRNOT00000005863]		FALSE
A_44_P119465	0.0438415	0.00554955	-0.462733	0.362937	0.299817	0.00385535	-1.37849	ENSRNOT00000040062	ENSRNOT00000040062	Atpase, class VI, type 11C (predicted) (Atp11c_predicted), mRNA [Source:RefSeq_dna;Acc:XR_007360] [ENSRNOT00000040062]		FALSE
A_44_P459362	0.00828401	0.000231797	-0.540267	-0.502707	0.119008	0.406651	1.17979	ENSRNOT00000013901	Xpo4_predicted	PREDICTED: Rattus norvegicus exportin 4 (predicted) (Xpo4_predicted), mRNA [XM_214191]		FALSE
A_44_P361357	0.0156098	0.000848003	-0.283574	0.302291	0.349534	0.587091	1.28028	XM_001058863	Sfpq	PREDICTED: Rattus norvegicus splicing factor proline/glutamine rich (polypyrimidine tract binding protein associated) (Sfpq), mRNA [XM_001058863]	XM_001058863	FALSE
A_42_P570313	0.0479332	0.0064767	0.912032	0.538649	0.0997489	0.042681	-0.938956	NM_133295	Ces3	Rattus norvegicus carboxylesterase 3 (Ces3), mRNA [NM_133295]	NM_133295	FALSE
A_44_P974956	0.0161157	0.000898356	0.184488	0.360228	0.996827	1.3256	1.88032	A_44_P974956	A_44_P974956			FALSE
A_44_P1059795	0.0381962	0.00432126	0.228683	-0.0212312	0.106283	0.480333	1.13497	NM_199380	Eif2s2	Rattus norvegicus eukaryotic translation initiation factor 2, subunit 2 (beta) (Eif2s2), mRNA [NM_199380]	NM_199380	FALSE
A_43_P16762	0.00445197	5.07319e-05	-0.136351	0.302004	0.648592	0.923761	1.40076	NM_001007733	Nudt5	Rattus norvegicus nudix (nucleoside diphosphate linked moiety X)-type motif 5 (Nudt5), mRNA [NM_001007733]	NM_001007733	FALSE
A_43_P22541	0.018958	0.00126663	0.116429	-0.183529	-0.380562	-0.69432	-1.34805	ENSRNOT00000013780	RGD1308772_predicted	PREDICTED: Rattus norvegicus similar to KIAA0564 protein (predicted) (RGD1308772_predicted), mRNA [XR_008855]		FALSE
A_44_P255350	0.0461956	0.00611619	0.107718	0.133407	0.304392	0.544959	1.36155	NM_001007674	Slc25a19	Rattus norvegicus solute carrier family 25 (mitochondrial thiamine pyrophosphate carrier), member 19 (Slc25a19), mRNA [NM_001007674]	NM_001007674	FALSE
A_44_P225239	0.0498317	0.00690246	-0.141622	0.266647	0.702413	0.729216	1.12563	ENSRNOT00000041852	ENSRNOT00000041852	similar to 60S ribosomal protein L12 (predicted) (RGD1561808_predicted), mRNA [Source:RefSeq_dna;Acc:XR_008016] [ENSRNOT00000041852]		FALSE
A_44_P144202	0.0201222	0.00139318	-0.00626206	0.0384512	-0.186345	-0.419372	-1.1673	NM_177927	Serpinf1	Rattus norvegicus serine (or cysteine) peptidase inhibitor, clade F, member 1 (Serpinf1), mRNA [NM_177927]	NM_177927	FALSE
A_42_P820650	0.040835	0.004929	0.104424	0.130846	0.459545	0.716517	1.12276	AW918031	AW918031	AW918031 EST349335 Rat gene index, normalized rat, norvegicus, Bento Soares Rattus norvegicus cDNA clone RGIEL41 5' end, mRNA sequence [AW918031]	AW918031	FALSE
A_43_P19251	0.0311897	0.00306879	0.238414	-0.472759	-0.565794	-0.541923	-0.697143	XR_006440	LOC501046	PREDICTED: Rattus norvegicus similar to Phakinin (Beaded filament structural protein 2) (Lens fiber cell beaded filament protein CP 49) (CP49) (49 kDa cytoskeletal protein) (LOC501046), mRNA [XR_006440]	XR_006440	FALSE
A_44_P1006655	0.0474199	0.00636879	0.0892732	0.155791	0.430118	0.486507	0.607606	NM_053597	Rps27	Rattus norvegicus ribosomal protein S27 (Rps27), mRNA [NM_053597]	NM_053597	FALSE
A_44_P324482	0.000147693	7.88157e-09	1.70099	1.54025	-0.45053	-0.920485	-1.45043	NM_001025762	Smyd3	Rattus norvegicus SET and MYND domain containing 3 (Smyd3), mRNA [NM_001025762]	NM_001025762	FALSE
A_44_P229501	0.0243503	0.00197688	-0.873314	-1.12672	-0.0638952	0.0736557	0.75614	ENSRNOT00000017254	ENSRNOT00000017254	Transforming protein RhoA precursor. [Source:Uniprot/SWISSPROT;Acc:P61589] [ENSRNOT00000017254]		FALSE
A_44_P1060345	0.0461381	0.00610473	0.0525039	0.858559	1.19383	1.34455	1.49413	NM_001037095	Cpox	Rattus norvegicus coproporphyrinogen oxidase (Cpox), mRNA [NM_001037095]	NM_001037095	FALSE
A_44_P367205	0.0387696	0.00445764	-0.0848415	-0.194089	-0.199504	-0.0385938	0.706459	ENSRNOT00000008164	RGD1565940_predicted	PREDICTED: Rattus norvegicus similar to ADP-ribosylation factor-like 10B (predicted) (RGD1565940_predicted), mRNA [XM_573456]		FALSE
A_44_P744884	0.0160457	0.000889762	-0.0724944	0.356724	0.617836	0.795025	1.41818	ENSRNOT00000011102	ENSRNOT00000011102			FALSE
A_44_P426529	0.00284077	1.81049e-05	0.568124	0.307876	-0.609195	-1.51422	-3.876	ENSRNOT00000023329	Me3_predicted	PREDICTED: Rattus norvegicus malic enzyme 3, NADP(+)-dependent, mitochondrial (predicted) (Me3_predicted), mRNA [XM_341880]		FALSE
A_44_P871255	0.0275716	0.0024524	-0.367757	-0.386267	0.0462992	0.395617	0.786115	TC615623	TC615623	Q2B6W2_9BACI (Q2B6W2) 3-ketoacyl-(Acyl-carrier-protein) reductase , partial (6%) [TC615623]		FALSE
A_44_P114491	0.00636313	0.000131072	-0.364121	-0.100749	0.200483	0.507462	1.37465	XM_227632	RGD1559750_predicted	PREDICTED: Rattus norvegicus similar to 5-aminoimidazole-4-carboxamide ribonucleotide formyltransferase/IMP cyclohydrolase (predicted) (RGD1559750_predicted), mRNA [XM_227632]	XM_227632	FALSE
A_43_P16455	0.0209278	0.00148982	0.228824	0.334254	0.497828	0.661346	1.58501	XM_224181	RGD1310211_predicted	PREDICTED: Rattus norvegicus similar to CG11030-PA (predicted) (RGD1310211_predicted), mRNA [XM_224181]	XM_224181	FALSE
A_44_P152020	0.0438593	0.00556023	-0.779238	-0.596708	-0.0567071	-0.0671408	0.308181	XR_005904	LOC680895	PREDICTED: Rattus norvegicus similar to poly(A) binding protein, cytoplasmic 1 (LOC680895), mRNA [XR_005904]	XR_005904	FALSE
A_44_P142194	0.00976589	0.000324621	-0.00162089	-0.0268985	0.34949	0.567963	1.30589	AY539899	AY539899	Rattus norvegicus LRRGT00148 mRNA, complete cds. [AY539899]	AY539899	FALSE
A_44_P494470	0.0328783	0.003381	-0.772914	-0.255619	-0.107867	0.262353	1.10607	XM_001058121	RGD1560873_predicted	PREDICTED: Rattus norvegicus similar to RIKEN cDNA E230015L20 gene (predicted) (RGD1560873_predicted), mRNA [XM_001058121]	XM_001058121	FALSE
A_44_P123732	0.00725771	0.000168478	-0.237827	-0.228453	0.154099	0.391045	1.16879	ENSRNOT00000030832	RGD1563307_predicted	PREDICTED: Rattus norvegicus similar to Set beta isoform (predicted) (RGD1563307_predicted), mRNA [XM_218493]		FALSE
A_44_P270144	0.00788957	0.000203355	-0.407328	0.278408	0.315361	0.575068	0.403062	BQ202422	BQ202422	BQ202422 UI-R-EB1-clg-o-14-0-UI.s1 UI-R-EB1 Rattus norvegicus cDNA clone UI-R-EB1-clg-o-14-0-UI 3', mRNA sequence [BQ202422]	BQ202422	FALSE
A_44_P384688	0.0242426	0.00196145	-0.418637	0.234635	1.09702	1.65819	1.7902	A_44_P384688	A_44_P384688			FALSE
A_43_P10309	0.0308935	0.00300708	-0.522989	0.0641451	0.360359	0.550326	0.479299	NM_001012179	Fxr1h	Rattus norvegicus fragile X mental retardation gene 1, autosomal homolog (Fxr1h), mRNA [NM_001012179]	NM_001012179	FALSE
A_44_P1052504	0.0233661	0.00183547	-0.122391	0.419783	0.794649	0.739078	1.02611	NM_181823	Rhot2	Rattus norvegicus ras homolog gene family, member T2 (Rhot2), mRNA [NM_181823]	NM_181823	FALSE
A_44_P279002	0.00772366	0.000194647	-0.0925957	0.426937	0.681246	1.04405	1.81168	ENSRNOT00000006549	Prpf40a_predicted	Rattus norvegicus similar to formin binding protein 11 (LOC295607), mRNA [XM_215739]		FALSE
A_42_P624382	0.00156182	2.08365e-06	0.0585355	0.0340754	0.374843	0.643429	1.29264	NM_138899	Cdipt	Rattus norvegicus CDP-diacylglycerol--inositol 3-phosphatidyltransferase (phosphatidylinositol synthase) (Cdipt), mRNA [NM_138899]	NM_138899	FALSE
A_44_P1037110	0.0049178	7.10279e-05	0.0416673	-0.0776731	0.0373077	0.309538	0.973213	NM_001025414	Dnd1	Rattus norvegicus dead end homolog 1 (zebrafish) (Dnd1), mRNA [NM_001025414]	NM_001025414	FALSE
A_43_P13016	0.0309443	0.00302044	0.25965	0.29777	0.431987	0.595813	0.908135	NM_054002	Zbtb7a	Rattus norvegicus zinc finger and BTB domain containing 7a (Zbtb7a), mRNA [NM_054002]	NM_054002	FALSE
A_44_P496422	0.0486823	0.00663565	0.401886	-0.102945	-0.0461586	-0.359666	-1.35599	NM_133428	Hrg	Rattus norvegicus histidine-rich glycoprotein (Hrg), mRNA [NM_133428]	NM_133428	FALSE
A_43_P19438	0.0194604	0.00131681	0.140018	0.425949	0.960209	1.24758	1.07758	NM_001015009	Zadh1	Rattus norvegicus zinc binding alcohol dehydrogenase, domain containing 1 (Zadh1), mRNA [NM_001015009]	NM_001015009	FALSE
A_44_P111566	0.040835	0.00492349	-0.258504	0.204915	0.420618	0.110676	1.15295	AW919037	AW919037	AW919037 EST350341 Rat gene index, normalized rat, norvegicus, Bento Soares Rattus norvegicus cDNA clone RGIFB93 5' end, mRNA sequence [AW919037]	AW919037	FALSE
A_44_P791696	0.00263214	1.37654e-05	0.218351	-0.4573	0.0218706	0.208057	0.658339	DV725758	DV725758	RVL17988 Wackym-Soares normalized rat vestibular cDNA library Rattus norvegicus cDNA 5', mRNA sequence [DV725758]	DV725758	FALSE
A_44_P166426	0.0354285	0.00377559	0.287294	0.240987	0.24322	0.40817	1.0929	XM_229703	XM_229703	Rattus norvegicus similar to cDNA sequence BC003993 (LOC317034), mRNA [XM_229703]	XM_229703	FALSE
A_44_P214900	0.00864364	0.000249761	0.453076	0.286134	0.0178692	-0.315426	-1.15118	NM_145779	Pzp	Rattus norvegicus pregnancy-zone protein (Pzp), mRNA [NM_145779]	NM_145779	FALSE
A_44_P119435	0.0141066	0.000701086	-0.0197047	0.00021565	0.358423	0.593379	1.09397	NM_001013092	Creb3	Rattus norvegicus cAMP responsive element binding protein 3 (Creb3), mRNA [NM_001013092]	NM_001013092	FALSE
A_43_P19039	0.0023314	6.44306e-06	0.225796	0.0602222	0.591609	1.17067	2.82415	ENSRNOT00000008753	RGD1560583_predicted	PREDICTED: Rattus norvegicus similar to 2810027O19Rik protein (predicted) (RGD1560583_predicted), mRNA [XM_342487]		FALSE
A_44_P1042234	0.00772366	0.000191629	-0.434809	-0.0986116	-0.0066399	0.815733	1.31617	NM_024346	Stmn3	Rattus norvegicus stathmin-like 3 (Stmn3), mRNA [NM_024346]	NM_024346	FALSE
A_44_P223978	0.0076944	0.000188044	0.2679	0.544254	0.184533	-0.15353	-0.783753	NM_001033757	Cdkn1c	Rattus norvegicus cyclin-dependent kinase inhibitor 1C (P57) (Cdkn1c), transcript variant 1, mRNA [NM_001033757]	NM_001033757	FALSE
A_42_P506402	0.0113967	0.00045492	-0.116192	1.28237	1.41952	-0.146537	-0.148517	NM_145677	Slc25a25	Rattus norvegicus solute carrier family 25 (mitochondrial carrier, phosphate carrier), member 25 (Slc25a25), mRNA [NM_145677]	NM_145677	FALSE
A_44_P185311	0.0309012	0.00300948	0.0541657	0.863517	1.06213	1.14358	0.902578	XM_343845	XM_343845	Rattus norvegicus similar to Tafazzin (LOC363521), mRNA [XM_343845]	XM_343845	FALSE
A_42_P667782	0.010261	0.000360677	0.0733883	0.352697	0.801254	1.20029	1.72222	NM_001009673	RGD1307883	Rattus norvegicus similar to RIKEN cDNA 2810421I24 (RGD1307883), mRNA [NM_001009673]	NM_001009673	FALSE
A_44_P846888	0.0110746	0.000421967	-0.198227	-0.494056	0.239843	0.405995	0.772203	BF566709	BF566709	UI-R-BJ0p-afd-f-09-0-UI.r1 UI-R-BJ0p Rattus norvegicus cDNA clone UI-R-BJ0p-afd-f-09-0-UI 5', mRNA sequence [BF566709]	BF566709	FALSE
A_44_P1070649	0.0315542	0.00315668	-0.420759	-0.0319123	0.204041	-0.0100614	-0.955837	ENSRNOT00000014715	ENSRNOT00000014715	Cytochrome P450 2C24 (Fragment). [Source:Uniprot/SPTREMBL;Acc:Q63854] [ENSRNOT00000014715]		FALSE
A_43_P11754	0.00503822	7.68733e-05	-0.745981	-0.795424	0.744409	1.39385	2.03881	NM_013215	Akr7a3	Rattus norvegicus aldo-keto reductase family 7, member A3 (aflatoxin aldehyde reductase) (Akr7a3), mRNA [NM_013215]	NM_013215	FALSE
A_44_P386724	0.0148254	0.000773749	-0.108998	0.0418847	-0.372075	-0.882427	-2.98126	NM_057155	Xpnpep2	Rattus norvegicus X-prolyl aminopeptidase (aminopeptidase P) 2, membrane-bound (Xpnpep2), mRNA [NM_057155]	NM_057155	FALSE
A_44_P899810	0.0418886	0.00514181	0.142071	0.106448	0.542804	0.703571	0.75958	XM_341853	Prrg2_predicted	PREDICTED: Rattus norvegicus proline-rich Gla (G-carboxyglutamic acid) polypeptide 2 (predicted) (Prrg2_predicted), mRNA [XM_341853]	XM_341853	FALSE
A_44_P535284	0.0195652	0.00132913	0.529799	0.574465	0.198096	-0.334528	-1.20886	NM_030850	Bhmt	Rattus norvegicus betaine-homocysteine methyltransferase (Bhmt), mRNA [NM_030850]	NM_030850	FALSE
A_42_P751001	0.00902809	0.000275579	-0.31673	0.169034	0.662556	0.905778	1.29356	NM_001025624	Hmgn2	Rattus norvegicus high mobility group nucleosomal binding domain 2 (Hmgn2), mRNA [NM_001025624]	NM_001025624	FALSE
A_44_P149199	0.0111472	0.000434797	-0.247001	0.271625	0.659934	0.791568	1.15214	NM_019259	C1qbp	Rattus norvegicus complement component 1, q subcomponent binding protein (C1qbp), mRNA [NM_019259]	NM_019259	FALSE
A_44_P871223	0.01158	0.000472123	0.069208	0.158198	0.419001	0.765335	1.4484	TC613494	TC613494	Q9R0B0_MOUSE (Q9R0B0) P100 polymyositis-scleroderma overlap syndrome associated autoantigen homolog (Fragment), partial (44%) [TC613494]		FALSE
A_44_P431661	0.00677953	0.00014624	0.231484	-0.0272532	-0.176908	-0.648098	-1.68805	ENSRNOT00000015888	Vill_predicted	PREDICTED: Rattus norvegicus villin-like (predicted) (Vill_predicted), mRNA [XM_217296]		FALSE
A_42_P641870	0.0111021	0.00042657	-0.690783	-0.182946	0.195825	0.497815	1.16102	NM_001024900	Tmem55a	Rattus norvegicus transmembrane protein 55A (Tmem55a), mRNA [NM_001024900]	NM_001024900	FALSE
A_44_P105434	0.0357618	0.00384354	0.0702723	0.155392	0.1321	0.0643952	-0.505552	ENSRNOT00000000345	Sec63_predicted	Rattus norvegicus similar to SEC63 (LOC309858), mRNA [XM_228305]		FALSE
A_42_P580305	0.00563341	0.00010101	0.517251	0.695519	-0.239813	-0.550051	-2.16939	NM_012621	Pfkfb1	Rattus norvegicus 6-phosphofructo-2-kinase/fructose-2,6-biphosphatase 1 (Pfkfb1), mRNA [NM_012621]	NM_012621	FALSE
A_42_P570919	0.017365	0.00107217	-0.636197	-0.398056	0.186796	0.314556	0.286884	NM_031000	Akr1a1	Rattus norvegicus aldo-keto reductase family 1, member A1 (Akr1a1), mRNA [NM_031000]	NM_031000	FALSE
A_44_P339898	0.0406641	0.00487034	-0.519011	-0.401286	0.303138	0.359149	0.466852	NM_001039022	RGD1310857	Rattus norvegicus similar to hypothetical protein D5Ertd33e (RGD1310857), mRNA [NM_001039022]	NM_001039022	FALSE
A_42_P683840	0.0404149	0.00480584	0.569019	-0.0196095	0.68578	0.688702	-0.155621	ENSRNOT00000060594	Ccl27_predicted	PREDICTED: Rattus norvegicus chemokine (C-C motif) ligand 27 (predicted) (Ccl27_predicted), mRNA [XM_342823]		FALSE
A_44_P213082	0.0166158	0.000970109	-0.232004	0.520722	0.669746	0.662425	0.160038	NM_001031641	Aga	Rattus norvegicus aspartylglucosaminidase (Aga), mRNA [NM_001031641]	NM_001031641	FALSE
A_44_P483177	0.0372316	0.0041406	-0.733999	-0.135666	-0.0080545	0.236523	0.609435	NM_001009344	Tbrg1	Rattus norvegicus transforming growth factor beta regulated gene 1 (Tbrg1), mRNA [NM_001009344]	NM_001009344	FALSE
A_44_P545314	0.0300068	0.0028375	-0.0774119	-0.592547	-0.545264	-0.213965	0.397522	NM_145678	Vps4a	Rattus norvegicus vacuolar protein sorting 4a (yeast) (Vps4a), mRNA [NM_145678]	NM_145678	FALSE
A_44_P260725	0.0293397	0.00273528	-0.115031	0.623249	0.789876	0.932717	1.23124	NM_001025626	RGD1306595	Rattus norvegicus similar to hypothetical protein (RGD1306595), mRNA [NM_001025626]	NM_001025626	FALSE
A_44_P622315	0.000840833	1.91345e-07	1.08794	0.800316	0.274713	-0.286338	-1.16758	TC584981	TC584981			FALSE
A_44_P1049865	0.0258204	0.00215503	0.762448	1.18154	1.013	0.696684	-0.873004	NM_031987	Crot	Rattus norvegicus carnitine O-octanoyltransferase (Crot), mRNA [NM_031987]	NM_031987	FALSE
A_44_P824046	0.0225428	0.00169335	-0.122672	0.0970127	0.492027	0.696561	0.328827	TC605346	TC605346			FALSE
A_44_P448126	0.0128722	0.000593996	-0.417283	-0.0778283	0.252344	0.304751	0.710544	XM_346131	LOC367415	PREDICTED: Rattus norvegicus similar to phospholipase A2, group XIIB (LOC367415), mRNA [XM_346131]	XM_346131	FALSE
A_44_P180268	0.0123646	0.000531163	-0.456609	-0.186235	0.0802879	0.0966146	0.452859	NM_001008338	Lrrc8d	Rattus norvegicus leucine rich repeat containing 8 family, member D (Lrrc8d), mRNA [NM_001008338]	NM_001008338	FALSE
A_44_P511333	0.0163386	0.000945324	-0.442106	-0.513396	-0.230812	-0.147014	0.502546	XR_007282	RGD1560227_predicted	PREDICTED: Rattus norvegicus similar to RIKEN cDNA 1700025B16 (predicted) (RGD1560227_predicted), mRNA [XR_007282]	XR_007282	FALSE
A_44_P784043	0.0426091	0.00528663	-0.180569	0.398928	0.351796	0.360526	-0.174606	TC631996	TC631996	ZN208_HUMAN (O43345) Zinc finger protein 208, partial (3%) [TC631996]		FALSE
A_44_P541213	0.000215881	3.45612e-08	1.25732	0.974573	-0.126535	-0.824094	-1.85742	XM_001059639	LOC681383	PREDICTED: Rattus norvegicus similar to Protein C10orf11 homolog (LOC681383), mRNA [XM_001059639]	XM_001059639	FALSE
A_44_P294817	0.0329347	0.00338855	0.141687	0.0352699	0.402071	0.724223	0.785047	NM_001034163	Blmh	Rattus norvegicus bleomycin hydrolase (Blmh), mRNA [NM_001034163]	NM_001034163	FALSE
A_42_P729705	0.0161923	0.00091508	0.0941234	0.466759	0.645362	0.981558	1.46412	AY318960	Sugt1	Rattus norvegicus Aa1114 mRNA, complete cds. [AY318960]	AY318960	FALSE
A_42_P675879	0.0264832	0.00228384	0.657675	0.931832	0.663778	0.409866	-0.475327	NM_173123	Cyp4f4	Rattus norvegicus cytochrome P450, family 4, subfamily f, polypeptide 4 (Cyp4f4), mRNA [NM_173123]	NM_173123	FALSE
A_44_P135666	0.0220443	0.00162479	-0.0203474	0.170085	0.42949	0.726696	0.939695	ENSRNOT00000038425	ENSRNOT00000038425	PREDICTED: Rattus norvegicus similar to Adapter-related protein complex 4 epsilon 1 subunit (Epsilon subunit of AP-4) (predicted) (RGD1562199_predicted), mRNA [XM_230571]		FALSE
A_44_P419882	0.0320496	0.00323548	0.0429769	0.0553566	0.557127	0.896132	1.54477	ENSRNOT00000038168	RGD1560617_predicted	PREDICTED: Rattus norvegicus hypothetical gene supported by NM_053561; AF062594 (predicted) (RGD1560617_predicted), mRNA [XM_238518]		FALSE
A_42_P571955	0.00611631	0.000119475	-0.280903	-0.249129	0.173678	0.480965	1.08724	NM_138888	Phf5a	Rattus norvegicus PHD finger protein 5A (Phf5a), mRNA [NM_138888]	NM_138888	FALSE
A_44_P434893	0.0114461	0.000459336	-0.434397	-0.0299547	0.320986	0.516111	0.536399	XM_001060588	LOC685284	PREDICTED: Rattus norvegicus similar to Placental protein 25 homolog (PP25) (LOC685284), mRNA [XM_001060588]	XM_001060588	FALSE
A_44_P959647	0.0311897	0.00307341	0.00101733	0.613141	0.915423	0.914669	0.539275	ENSRNOT00000038075	LOC683813			FALSE
A_44_P465554	0.0129095	0.000597973	-0.542652	0.00508034	0.341544	0.468442	0.547558	NM_031354	Vdac2	Rattus norvegicus voltage-dependent anion channel 2 (Vdac2), mRNA [NM_031354]	NM_031354	FALSE
A_42_P696406	0.0228566	0.00174544	-0.370954	-0.372122	0.266104	0.512824	0.797914	XM_213226	XM_213226	Rattus norvegicus similar to RIKEN cDNA 2810417J12 gene (LOC287103), mRNA [XM_213226]	XM_213226	FALSE
A_44_P499142	0.0130548	0.000610976	0.00290596	0.760662	0.946926	1.23332	1.67987	ENSRNOT00000024557	Rad1_predicted	PREDICTED: Rattus norvegicus RAD1 homolog (S. pombe) (predicted) (Rad1_predicted), mRNA [XM_215497]		FALSE
A_42_P607039	0.0417339	0.00507439	-0.209011	0.156003	0.199334	0.387015	0.678512	XM_230589	Anapc1_predicted	PREDICTED: Rattus norvegicus anaphase promoting complex subunit 1 (predicted) (Anapc1_predicted), mRNA [XM_230589]	XM_230589	FALSE
A_44_P1047375	0.0285096	0.00259856	0.229976	0.323556	0.671172	0.93507	1.09081	NM_001011904	Rnf10	Rattus norvegicus ring finger protein 10 (Rnf10), mRNA [NM_001011904]	NM_001011904	FALSE
A_44_P667768	0.0307365	0.0029749	-0.246585	0.412926	0.765039	1.07406	0.833181	A_44_P667768	A_44_P667768			FALSE
A_43_P14881	0.0286866	0.00263	0.0969305	0.295421	0.486916	0.765343	1.22754	NM_031121	Ssrp1	Rattus norvegicus structure specific recognition protein 1 (Ssrp1), mRNA [NM_031121]	NM_031121	FALSE
A_44_P405360	0.0242122	0.0019562	0.162673	0.495849	0.6974	0.89991	1.01811	NM_001009635	RGD1306437	Rattus norvegicus similar to RIKEN cDNA 6330409N04 (RGD1306437), mRNA [NM_001009635]	NM_001009635	FALSE
A_42_P546775	0.032825	0.00337377	0.40597	0.617527	0.665033	1.08008	1.51213	XM_216644	RGD1305264_predicted	PREDICTED: Rattus norvegicus similar to hypothetical protein FLJ20272 (predicted) (RGD1305264_predicted), mRNA [XM_216644]	XM_216644	FALSE
A_44_P154367	0.0323917	0.00331886	-0.913945	-0.281909	-0.187879	-0.0499547	0.157639	NM_001024744	Cdc16	Rattus norvegicus CDC16 cell division cycle 16 homolog (S. cerevisiae) (Cdc16), mRNA [NM_001024744]	NM_001024744	FALSE
A_43_P15850	0.0120806	0.000510499	-0.124959	0.0497974	-0.410699	-0.495192	-1.51359	NM_175766	Cyp2j9	Rattus norvegicus cytochrome P450, family 2, subfamily j, polypeptide 9 (Cyp2j9), mRNA [NM_175766]	NM_175766	FALSE
A_43_P14163	0.00746417	0.000176059	-0.100631	-0.466489	0.11855	0.503154	1.5065	NM_012615	Odc1	Rattus norvegicus ornithine decarboxylase 1 (Odc1), mRNA [NM_012615]	NM_012615	FALSE
A_44_P267824	0.0368252	0.0040443	0.306799	-0.303314	-0.0769152	-0.338721	-1.19639	BQ782596	BQ782596	BQ782596 UI-R-FF0-cpk-n-03-0-UI.s1 NCI_CGAP_FF0 Rattus norvegicus cDNA clone UI-R-FF0-cpk-n-03-0-UI 3', mRNA sequence [BQ782596]	BQ782596	FALSE
A_44_P655158	0.00588949	0.000109059	0.284435	0.263767	0.236993	-0.132874	-1.01285	CO567276	CO567276	AGENCOURT_28447107 NIH_MGC_248 Rattus norvegicus cDNA clone IMAGE:7367429 5', mRNA sequence [CO567276]	CO567276	FALSE
A_44_P309584	0.0346955	0.00363201	-0.265696	0.278327	0.664849	0.657236	0.894128	ENSRNOT00000033412	RGD1306228_predicted	PREDICTED: Rattus norvegicus similar to chromosome 14 open reading frame 138 (predicted) (RGD1306228_predicted), mRNA [XM_343073]		FALSE
A_44_P149412	0.0148497	0.000778184	-0.0368448	-0.325136	0.440369	0.829287	1.37813	NM_053563	Ddx39	Rattus norvegicus DEAD (Asp-Glu-Ala-Asp) box polypeptide 39 (Ddx39), mRNA [NM_053563]	NM_053563	FALSE
A_44_P515360	0.0370363	0.00408922	0.0447358	0.847954	1.00574	1.06118	0.454035	L22079	Scamp1	Rat marker SCAMP 37 mRNA. [L22079]	L22079	FALSE
A_44_P260055	0.0056964	0.000103051	-0.871598	-0.429356	0.00487965	0.293032	0.520745	NM_031043	Gyg1	Rattus norvegicus glycogenin 1 (Gyg1), mRNA [NM_031043]	NM_031043	FALSE
A_44_P260522	0.0226428	0.00170495	-0.4718	0.00948721	0.407215	0.513498	0.686101	XR_008133	RGD1561252_predicted	PREDICTED: Rattus norvegicus similar to Ubiquitin carboxyl-terminal hydrolase isozyme L3 (Ubiquitin thiolesterase L3) (predicted) (RGD1561252_predicted), mRNA [XR_008133]	XR_008133	FALSE
A_44_P505851	0.0160457	0.000890241	-0.256612	-0.243522	0.147556	0.399873	1.09446	NM_001012504	Set_predicted	Rattus norvegicus SET translocation (predicted) (Set_predicted), mRNA [NM_001012504]	NM_001012504	FALSE
A_44_P367761	0.00427098	4.65206e-05	-0.364383	0.118573	0.54435	1.10705	2.60966	NM_012923	Ccng1	Rattus norvegicus cyclin G1 (Ccng1), mRNA [NM_012923]	NM_012923	FALSE
A_44_P485258	0.00557396	9.87541e-05	0.0716414	-0.0809863	-0.605136	-0.80668	-2.38683	ENSRNOT00000025534	C5	Complement C5 [Contains: C5a anaphylatoxin] (Fragment). [Source:Uniprot/SWISSPROT;Acc:P08650] [ENSRNOT00000025534]		FALSE
A_43_P11306	0.00602691	0.000115463	-0.718693	-0.508348	0.00912845	0.310338	0.97993	NM_001010945	RGD1311474	Rattus norvegicus similar to transmembrane protein induced by tumor necrosis factor alpha (RGD1311474), mRNA [NM_001010945]	NM_001010945	FALSE
A_44_P1060459	0.0299605	0.00283133	0.166581	0.678514	0.931288	0.850868	0.796748	NM_001004256	Sirt5	Rattus norvegicus sirtuin 5 (silent mating type information regulation 2 homolog) 5 (S. cerevisiae) (Sirt5), mRNA [NM_001004256]	NM_001004256	FALSE
A_42_P542583	0.0148508	0.000779441	-0.24183	-0.276353	0.360169	0.874453	1.57781	NM_001005876	Hn1	Rattus norvegicus hematological and neurological expressed sequence 1 (Hn1), mRNA [NM_001005876]	NM_001005876	FALSE
A_44_P561179	0.00601283	0.000114872	0.0647349	0.493449	0.637535	0.872816	1.37861	ENSRNOT00000047111	RGD1565784_predicted	PREDICTED: Rattus norvegicus RGD1565784 (predicted) (RGD1565784_predicted), mRNA [XM_573057]		FALSE
A_44_P262064	0.00481519	6.30458e-05	0.321191	0.128704	0.000348091	-0.583967	-1.65733	NM_182474	LOC299282	Rattus norvegicus Serine protease inhibitor (LOC299282), mRNA [NM_182474]	NM_182474	FALSE
A_43_P23290	0.00824456	0.000228783	0.620867	-0.449566	-0.144989	-0.335027	-0.458185	ENSRNOT00000027574	Sh3pxd2a_predicted	PREDICTED: Rattus norvegicus SH3 and PX domains 2A (predicted) (Sh3pxd2a_predicted), mRNA [XM_219971]		FALSE
A_44_P557994	0.013014	0.00060837	0.243242	-0.261293	0.268937	0.345638	1.00731	XR_006555	LOC298125	PREDICTED: Rattus norvegicus similar to 60S ribosomal protein L13 (LOC298125), mRNA [XR_006555]	XR_006555	FALSE
A_44_P119442	0.0398558	0.00466639	-0.220179	-0.0832387	0.279368	0.549217	0.888445	ENSRNOT00000022132	Creb3	cAMP responsive element binding protein 3 [Source:RefSeq_peptide;Acc:NP_001013110] [ENSRNOT00000022132]		FALSE
A_44_P981679	0.0146442	0.000754915	-0.422791	-0.355516	-0.0733071	0.676775	1.7854	XM_235547	RGD1560783_predicted	PREDICTED: Rattus norvegicus similar to RIKEN cDNA 3110048E14, isoform a (predicted) (RGD1560783_predicted), mRNA [XM_235547]	XM_235547	FALSE
A_44_P210868	0.031212	0.00309139	0.602294	-0.279528	-0.447118	-0.405995	-0.305923	XM_238278	Sptbn5_predicted	Rattus norvegicus similar to Spectrin beta chain, brain 4 (Spectrin, non-erythroid beta chain 4) (Beta-V spectrin) (BSPECV) (LOC296090), mRNA [XM_238278]	XM_238278	FALSE
A_44_P441947	0.0217942	0.00160181	0.332343	0.19162	0.644346	0.931077	1.26431	XM_001079870	LOC687711	PREDICTED: Rattus norvegicus similar to small nuclear ribonucleoprotein D3 (LOC687711), mRNA [XM_001079870]	XM_001079870	FALSE
A_43_P13109	0.0401206	0.00471058	0.482672	0.522517	0.224254	-0.045602	-1.82875	NM_130408	Cyp26a1	Rattus norvegicus cytochrome P450, family 26, subfamily A, polypeptide 1 (Cyp26a1), mRNA [NM_130408]	NM_130408	FALSE
A_44_P257804	0.0477229	0.00643273	0.138433	-0.188292	0.286564	0.438488	0.685453	XR_005805	LOC316866	PREDICTED: Rattus norvegicus similar to 60S ribosomal protein L7a (LOC316866), mRNA [XR_005805]	XR_005805	FALSE
A_43_P19791	0.0261855	0.00224086	0.351108	0.356752	0.835559	1.07553	1.2182	XM_343063	XM_343063	Rattus norvegicus signal recognition particle 54 kDa (Srp54), mRNA [XM_343063]	XM_343063	FALSE
A_44_P621592	0.0224534	0.00166792	0.228922	-0.305006	0.341982	0.389425	1.038	XR_006674	LOC366328	PREDICTED: Rattus norvegicus similar to 60S ribosomal protein L13 (LOC366328), mRNA [XR_006674]	XR_006674	FALSE
A_44_P561352	0.0162573	0.000923959	5.60284e-06	0.381882	0.545318	0.731502	1.09883	XM_342912	RGD1310440_predicted	PREDICTED: Rattus norvegicus similar to hypothetical protein (predicted) (RGD1310440_predicted), mRNA [XM_342912]	XM_342912	FALSE
A_44_P527154	0.0461966	0.00612168	0.286763	-0.182319	0.132514	0.327949	0.839985	NM_001024282	RGD1564767_predicted	Rattus norvegicus Histone H2a (predicted) (RGD1564767_predicted), mRNA [NM_001024282]	NM_001024282	FALSE
A_44_P915165	0.00136988	1.02345e-06	0.12235	0.0111492	0.313746	1.03275	1.22547	TC597191	TC597191			FALSE
A_44_P914285	0.0161408	0.000901492	0.125427	0.268401	0.851568	1.23977	1.42446	XM_001062172	LOC681996	PREDICTED: Rattus norvegicus similar to AHA1, activator of heat shock 90kDa protein ATPase homolog 1, transcript variant 2 (LOC681996), mRNA [XM_001062172]	XM_001062172	FALSE
A_44_P165989	0.0480235	0.00651408	-0.0598402	0.218863	0.0825219	-0.0117393	-0.812759	NM_001014161	LOC361596	Rattus norvegicus similar to NADP+-specific isocitrate dehydrogenase (LOC361596), mRNA [NM_001014161]	NM_001014161	FALSE
A_44_P444801	0.028992	0.00268121	-0.150682	0.131535	0.342355	0.209042	-0.496658	NM_001013082	Pon2	Rattus norvegicus paraoxonase 2 (Pon2), mRNA [NM_001013082]	NM_001013082	FALSE
A_44_P520382	0.00963502	0.000312236	-0.354693	0.0921327	0.427635	0.679041	1.2361	NM_001007014	LOC474154	Rattus norvegicus zinc responsive protein ZD7 (LOC474154), mRNA [NM_001007014]	NM_001007014	FALSE
A_44_P313625	0.0049178	7.17206e-05	-0.244128	0.181193	0.713543	0.865128	1.10054	AY321330	LOC361750	Rattus norvegicus Ac2-067 mRNA, complete cds. [AY321330]	AY321330	FALSE
A_44_P492189	0.0459799	0.00605845	-0.195246	-0.0556752	0.110416	-0.170417	-1.06344	NM_001008374	Pgrmc2	Rattus norvegicus progesterone receptor membrane component 2 (Pgrmc2), mRNA [NM_001008374]	NM_001008374	FALSE
A_44_P148636	0.0472892	0.00634173	0.0271851	0.395763	0.669174	0.975297	1.11485	ENSRNOT00000030931	RGD1305050_predicted	PREDICTED: Rattus norvegicus similar to RIKEN cDNA 1500016L11 (predicted) (RGD1305050_predicted), mRNA [XM_344860]		FALSE
A_44_P520521	0.00520709	8.28065e-05	-0.464236	0.141946	0.0313017	-0.185522	-1.89833	ENSRNOT00000023241	Slc17a2_predicted	Rattus norvegicus similar to RIKEN cDNA C730032N17 (LOC306950), mRNA [XM_225332]		FALSE
A_44_P166930	0.0119319	0.000499203	-0.435362	0.0261997	-0.222365	-0.779011	-1.78996	ENSRNOT00000020325	Aldh7a1	Aldehyde dehydrogenase family 7 member A1 (EC 1.2.1.3) (Antiquitin-1) (Fragment). [Source:Uniprot/SWISSPROT;Acc:Q64057] [ENSRNOT00000020325]		FALSE
A_44_P522492	0.0242426	0.00196074	-0.594483	0.292118	0.430285	0.644272	0.828442	NM_133414	Clcc1	Rattus norvegicus chloride channel CLIC-like 1 (Clcc1), mRNA [NM_133414]	NM_133414	FALSE
A_44_P158361	0.0112387	0.000442016	-0.0231147	0.312908	0.735297	0.931901	0.99825	NM_001033696	Hnrpdl	Rattus norvegicus heterogeneous nuclear ribonucleoprotein D-like (Hnrpdl), mRNA [NM_001033696]	NM_001033696	FALSE
A_42_P668800	0.0465945	0.00619348	0.197891	0.586206	0.702767	0.623146	-0.0339292	XM_343225	Uqcrb_predicted	PREDICTED: Rattus norvegicus ubiquinol-cytochrome c reductase binding protein (predicted) (Uqcrb_predicted), mRNA [XM_343225]	XM_343225	FALSE
A_42_P489817	0.00304726	2.3082e-05	0.590685	0.880445	0.220846	-0.324773	-1.71683	AW915389	AW915389	AW915389 EST346693 Normalized rat embryo, Bento Soares Rattus sp. cDNA clone RGICU85 5' end, mRNA sequence [AW915389]	AW915389	FALSE
A_44_P227361	0.0250219	0.00205501	0.225221	0.0257784	0.211175	0.450909	1.20651	ENSRNOT00000008741	Bms1l	PREDICTED: Rattus norvegicus BMS1-like, ribosome assembly protein (yeast) (Bms1l), mRNA [XM_342746]		FALSE
A_44_P332429	0.0283471	0.0025777	-0.2345	0.253196	0.187528	-0.0472734	-1.14054	NM_138900	C1s	Rattus norvegicus complement component 1, s subcomponent (C1s), mRNA [NM_138900]	NM_138900	FALSE
A_43_P14869	0.0394445	0.00457911	0.154588	0.644797	1.0899	1.22958	1.13124	ENSRNOT00000005961	Adss_predicted	PREDICTED: Rattus norvegicus adenylosuccinate synthetase, non muscle (predicted) (Adss_predicted), mRNA [XM_222946]		FALSE
A_42_P767403	0.0111457	0.000431867	0.185023	-0.0353019	-0.102647	-0.328982	-0.60796	ENSRNOT00000019687	Zbtb4_predicted	PREDICTED: Rattus norvegicus zinc finger and BTB domain containing 4 (predicted) (Zbtb4_predicted), mRNA [XM_220612]		FALSE
A_43_P13256	0.0178649	0.00113449	0.262383	-0.149204	-0.208405	-0.517798	-1.18896	NM_134387	Dcxr	Rattus norvegicus dicarbonyl L-xylulose reductase (Dcxr), mRNA [NM_134387]	NM_134387	FALSE
A_44_P410378	0.0394445	0.00458321	0.633324	0.718214	0.754619	0.589251	-1.1848	ENSRNOT00000012327	RGD1310769_predicted	PREDICTED: Rattus norvegicus similar to HSPC288 (predicted) (RGD1310769_predicted), mRNA [XM_216756]		FALSE
A_44_P156247	0.0183996	0.001193	-0.758752	-0.147863	0.0188717	0.152475	0.452449	NM_057195	Smu1	Rattus norvegicus smu-1 suppressor of mec-8 and unc-52 homolog (C. elegans) (Smu1), mRNA [NM_057195]	NM_057195	FALSE
A_43_P19211	0.0423743	0.00524845	-0.334385	-0.331719	-0.0154764	0.137877	0.453157	ENSRNOT00000035770	Rbbp6	Rbbp6 protein (Fragment). [Source:Uniprot/SPTREMBL;Acc:Q5EB85] [ENSRNOT00000035770]		FALSE
A_44_P850592	0.0396239	0.00462444	-0.606858	-0.378534	0.229004	0.549019	0.886549	CB312819	CB312819	AGENCOURT_11468960 NICHD_Rr_Pit1 Rattus norvegicus cDNA clone IMAGE:6890057 5', mRNA sequence [CB312819]	CB312819	FALSE
A_44_P365653	0.0443828	0.00568196	-0.473759	-0.0316057	-0.269782	-0.463193	-1.45254	NM_001014161	LOC361596	Rattus norvegicus similar to NADP+-specific isocitrate dehydrogenase (LOC361596), mRNA [NM_001014161]	NM_001014161	FALSE
A_44_P289173	0.0369199	0.00406652	-0.328707	-0.018778	0.577602	0.737749	0.868974	BC097985	Grtp1	Rattus norvegicus GH regulated TBC protein 1, mRNA (cDNA clone MGC:116122 IMAGE:7444444), complete cds. [BC097985]	BC097985	FALSE
A_44_P262192	0.0144848	0.00073742	-0.498835	0.153174	0.637764	0.928796	1.08995	NM_182814	Cct4	Rattus norvegicus chaperonin subunit 4 (delta) (Cct4), mRNA [NM_182814]	NM_182814	FALSE
A_44_P537024	0.0228315	0.00174109	-0.0579093	-0.164854	0.0236626	0.226053	0.99006	BC133726	RGD1560410_predicted	Rattus norvegicus cDNA clone MGC:156736 IMAGE:7104339, complete cds [BC133726]	BC133726	FALSE
A_44_P443412	0.0172456	0.00106019	-0.402049	-0.194529	0.317631	0.465809	0.752856	NM_001029917	RGD1309929	Rattus norvegicus similar to RIKEN cDNA 0610016J10 gene (RGD1309929), mRNA [NM_001029917]	NM_001029917	FALSE
A_42_P700829	0.0144356	0.000733375	0.19364	0.445105	0.543483	0.780315	1.70971	XR_008991	Dnttip2_predicted	PREDICTED: Rattus norvegicus deoxynucleotidyltransferase, terminal, interacting protein 2 (predicted) (Dnttip2_predicted), mRNA [XR_008991]	XR_008991	FALSE
A_44_P1042504	0.00284077	1.93149e-05	-0.272045	0.0159556	0.590328	0.712703	1.39408	NM_001044232	Rg9mtd2	Rattus norvegicus RNA (guanine-9-) methyltransferase domain containing 2 (Rg9mtd2), mRNA [NM_001044232]	NM_001044232	FALSE
A_44_P813198	0.0126307	0.000565861	-0.220236	0.127414	0.205009	0.291839	0.977975	BE098025	BE098025	UI-R-C4-amc-e-03-0-UI.s1 UI-R-C4 Rattus norvegicus cDNA clone UI-R-C4-amc-e-03-0-UI 3', mRNA sequence [BE098025]	BE098025	FALSE
A_44_P1031109	0.0212862	0.00153919	-0.487301	-0.438706	-0.119912	0.291531	0.765537	NM_001004231	Npdc1	Rattus norvegicus neural proliferation, differentiation and control, 1 (Npdc1), mRNA [NM_001004231]	NM_001004231	FALSE
A_43_P13006	0.00253917	1.11155e-05	0.00433755	0.353188	0.865487	1.28873	1.7202	NM_053980	Arfrp1	Rattus norvegicus ADP-ribosylation factor related protein 1 (Arfrp1), mRNA [NM_053980]	NM_053980	FALSE
A_42_P508471	0.0198438	0.00136288	0.522156	1.23341	0.79147	0.57133	-1.26043	NM_031546	Rgn	Rattus norvegicus regucalcin (Rgn), mRNA [NM_031546]	NM_031546	FALSE
A_44_P1004323	0.00485073	6.61874e-05	0.608163	-0.0483075	-0.179129	-0.44706	-0.843421	ENSRNOT00000045315	Col18a1	Collagen type XVIII, alpha (I) chain (Fragment). [Source:Uniprot/SPTREMBL;Acc:Q9WUW5] [ENSRNOT00000045315]		FALSE
A_44_P590748	0.00873208	0.000258783	-0.983651	-0.0603047	0.101201	0.10858	0.29221	ENSRNOT00000009620	RGD1560496_predicted	PREDICTED: Rattus norvegicus similar to HELICARD (predicted) (RGD1560496_predicted), mRNA [XM_575141]		FALSE
A_44_P445854	0.0202569	0.00141936	-0.184037	0.176406	-0.0414329	-0.324007	-1.09421	ENSRNOT00000048579	RGD1564722_predicted	PREDICTED: Rattus norvegicus similar to C19orf36 protein (predicted) (RGD1564722_predicted), mRNA [XM_343160]		FALSE
A_44_P426707	0.0223569	0.00165717	-0.847966	-0.146216	-0.200428	-0.238623	-1.28349	ENSRNOT00000017640	RGD1560511_predicted	PREDICTED: Rattus norvegicus similar to Vps41 protein (predicted) (RGD1560511_predicted), mRNA [XM_001053199]		FALSE
A_44_P1031726	0.0369002	0.00405726	-0.768754	-0.354607	-0.0694734	0.125341	0.330567	XM_215751	Dnajc10	PREDICTED: Rattus norvegicus DnaJ (Hsp40) homolog, subfamily C, member 10 (Dnajc10), mRNA [XM_215751]	XM_215751	FALSE
A_44_P1045805	0.0267617	0.00231975	-0.0779098	0.0890557	0.211145	0.351367	0.637714	NM_001008350	Taf11	Rattus norvegicus TAF11 RNA polymerase II, TATA box binding protein (TBP)-associated factor (Taf11), mRNA [NM_001008350]	NM_001008350	FALSE
A_44_P465188	0.00608917	0.000116981	0.0986631	0.169715	-0.0323286	-0.910987	-3.48452	NM_053445	Fads1	Rattus norvegicus fatty acid desaturase 1 (Fads1), mRNA [NM_053445]	NM_053445	FALSE
A_44_P210410	0.0442286	0.00565278	0.0356296	-0.104171	0.53727	0.701273	1.1027	NM_001013886	Tubb2b	Rattus norvegicus tubulin, beta 2b (Tubb2b), mRNA [NM_001013886]	NM_001013886	FALSE
A_44_P531758	0.0419882	0.00516926	-0.366348	-0.360245	0.194666	0.980026	1.15313	NM_012935	Cryab	Rattus norvegicus crystallin, alpha B (Cryab), mRNA [NM_012935]	NM_012935	FALSE
A_44_P281595	0.0173248	0.00106783	-0.174259	0.113116	0.208808	0.404868	0.470864	NM_001037556	Nmnat1	Rattus norvegicus nicotinamide nucleotide adenylyltransferase 1 (Nmnat1), mRNA [NM_001037556]	NM_001037556	FALSE
A_43_P17682	0.022929	0.00176546	-0.0633513	0.223964	0.13569	-0.223815	-0.65273	XM_342699	XM_342699	Rattus norvegicus similar to testis-specific adriamycin sensitivity protein (LOC362375), mRNA [XM_342699]	XM_342699	FALSE
A_42_P827480	0.0166158	0.000970935	-0.010811	-0.446071	-0.0905313	-0.466739	-1.03194	ENSRNOT00000056849	ENSRNOT00000056849	Amyloid beta A4-like protein 1 (Fragment). [Source:Uniprot/SPTREMBL;Acc:Q1P9T9] [ENSRNOT00000056849]		FALSE
A_42_P735353	0.00478449	6.05115e-05	-0.113121	0.250531	0.414124	0.867569	1.91081	NM_053757	Scye1	Rattus norvegicus small inducible cytokine subfamily E, member 1 (Scye1), mRNA [NM_053757]	NM_053757	FALSE
A_42_P496725	0.0121749	0.000517816	-0.0928974	0.397987	0.478886	0.936461	1.39119	NM_031119	Ssb	Rattus norvegicus Sjogren syndrome antigen B (Ssb), mRNA [NM_031119]	NM_031119	FALSE
A_44_P315367	0.0477229	0.00643475	0.151367	0.519819	0.400184	0.745336	1.56383	BC087644	Gart	Rattus norvegicus phosphoribosylglycinamide formyltransferase, mRNA (cDNA clone IMAGE:7311687), complete cds. [BC087644]	BC087644	FALSE
A_44_P101223	0.0153595	0.000825501	0.0508907	-0.188942	-0.160424	-0.407976	-1.44191	XM_344744	Gcdh_predicted	PREDICTED: Rattus norvegicus glutaryl-Coenzyme A dehydrogenase (predicted) (Gcdh_predicted), mRNA [XM_344744]	XM_344744	FALSE
A_44_P517682	0.00901694	0.000273313	0.044443	0.148971	0.652046	1.00763	1.25268	NM_212519	Tomm70a	Rattus norvegicus translocase of outer mitochondrial membrane 70 homolog A (yeast) (Tomm70a), mRNA [NM_212519]	NM_212519	FALSE
A_44_P748589	0.00576605	0.000105311	0.274985	0.799422	0.945451	1.01369	1.4803	TC610878	TC610878	Q62D02_BURMA (Q62D02) CheC family protein, partial (7%) [TC602451]		FALSE
A_44_P775932	0.010241	0.000355578	-0.160047	0.235967	0.889077	1.29449	1.66949	ENSRNOT00000036737	ENSRNOT00000036737			FALSE
A_42_P622837	0.00284077	1.95357e-05	-0.175272	0.206072	0.308137	0.81758	1.88042	NM_001013860	RGD1306819	Rattus norvegicus similar to A230072I16Rik protein (RGD1306819), mRNA [NM_001013860]	NM_001013860	FALSE
A_44_P210173	0.0260339	0.00220896	-0.140483	0.137318	0.0925368	0.610231	2.44891	NM_181086	Tnfrsf12a	Rattus norvegicus tumor necrosis factor receptor superfamily, member 12a (Tnfrsf12a), mRNA [NM_181086]	NM_181086	FALSE
A_44_P302145	0.0472221	0.00631761	-0.515281	0.201099	0.258129	-0.0241188	-0.696598	ENSRNOT00000007062	LOC501925	Rattus norvegicus similar to GLUT9a (LOC305426), mRNA [XM_223511]		FALSE
A_44_P1053550	0.0277064	0.00246916	-0.0820901	-0.0293776	0.186598	0.295551	0.608169	NM_001014247	Lzts2	Rattus norvegicus leucine zipper, putative tumor suppressor 2 (Lzts2), mRNA [NM_001014247]	NM_001014247	FALSE
A_44_P233592	0.0403276	0.00477508	-0.171179	0.401506	0.673721	0.821213	0.574649	NM_199405	Lcmt1	Rattus norvegicus leucine carboxyl methyltransferase 1 (Lcmt1), mRNA [NM_199405]	NM_199405	FALSE
A_44_P1013485	0.00468337	5.65075e-05	-0.142548	0.256238	0.325288	0.704923	1.0767	NM_001024875	RGD1307254	Rattus norvegicus similar to RIKEN cDNA 1200011I18 (RGD1307254), mRNA [NM_001024875]	NM_001024875	FALSE
A_44_P960581	0.0429024	0.00535278	0.475566	0.40635	0.43629	0.0967305	-1.07642	TC602763	TC602763			FALSE
A_44_P459409	0.00652496	0.000138545	-0.734348	0.0861909	0.191327	0.399201	0.761163	NM_001034994	Rwdd4a	Rattus norvegicus RWD domain containing 4A (Rwdd4a), mRNA [NM_001034994]	NM_001034994	FALSE
A_44_P118590	0.01378	0.000678006	-0.689493	0.0742031	0.215742	0.92853	1.20193	AW914340	AW914340	AW914340 EST345644 Normalized rat brain, Bento Soares Rattus sp. cDNA clone RGIAD63 5' end, mRNA sequence [AW914340]	AW914340	FALSE
A_43_P18233	0.0315334	0.00314678	0.481737	-0.450308	-0.408345	-0.875352	-1.12758	ENSRNOT00000049810	RGD1560320_predicted	PREDICTED: Rattus norvegicus similar to brain specific protein 4 (predicted) (RGD1560320_predicted), mRNA [XM_342287]		FALSE
A_44_P1046705	0.00873208	0.000259087	0.0358607	-0.0329686	0.429846	0.628432	0.88268	ENSRNOT00000025008	RGD1559901_predicted	PREDICTED: Rattus norvegicus similar to mitochondrial ribosomal protein S11 (predicted) (RGD1559901_predicted), mRNA [XM_574478]		FALSE
A_42_P714245	0.0135593	0.000657091	-0.0426451	0.205438	0.565991	0.979116	1.28276	NM_001003708	Trappc4	Rattus norvegicus trafficking protein particle complex 4 (Trappc4), mRNA [NM_001003708]	NM_001003708	FALSE
A_43_P12297	0.0120188	0.000504764	-0.632289	0.234663	0.308748	0.488415	0.587094	NM_022689	Snap23	Rattus norvegicus synaptosomal-associated protein 23 (Snap23), mRNA [NM_022689]	NM_022689	FALSE
A_43_P12832	0.00253917	9.23763e-06	-0.433932	-0.124255	0.0356578	1.14238	2.38923	NM_053516	Nol3	Rattus norvegicus nucleolar protein 3 (apoptosis repressor with CARD domain) (Nol3), mRNA [NM_053516]	NM_053516	FALSE
A_44_P1047628	0.0260529	0.00221754	0.0460106	0.740868	0.965721	0.876476	1.37473	NM_001014064	Pars2	Rattus norvegicus prolyl-tRNA synthetase (mitochondrial)(putative) (Pars2), mRNA [NM_001014064]	NM_001014064	FALSE
A_44_P485694	0.00965928	0.000313918	-0.0699726	0.471725	0.947768	1.05276	0.947176	NM_017248	Hnrpa1	Rattus norvegicus heterogeneous nuclear ribonucleoprotein A1 (Hnrpa1), mRNA [NM_017248]	NM_017248	FALSE
A_44_P494242	0.00451246	5.24998e-05	-0.166347	-0.282642	0.0383546	0.996744	1.51949	NM_130416	Anxa7	Rattus norvegicus annexin A7 (Anxa7), mRNA [NM_130416]	NM_130416	FALSE
A_44_P426307	0.0163386	0.000941951	0.172063	0.269607	0.577918	0.874452	1.54411	CK601249	CK601249	AGENCOURT_17900648 NIH_MGC_234 Rattus norvegicus cDNA clone IMAGE:7190797 5', mRNA sequence [CK601249]	CK601249	FALSE
A_42_P457895	0.0315542	0.0031541	-0.570973	-0.126956	0.207256	0.329665	0.427798	NM_001012462	Supv3l1	Rattus norvegicus suppressor of var1, 3-like 1 (S. cerevisiae) (Supv3l1), mRNA [NM_001012462]	NM_001012462	FALSE
A_44_P530211	0.00468337	5.69832e-05	0.1807	0.42244	0.753547	1.09611	1.316	XM_343304	RGD1304694	PREDICTED: Rattus norvegicus similar to CG9646-PA (RGD1304694), mRNA [XM_343304]	XM_343304	FALSE
A_43_P11369	0.0280568	0.00252359	-0.19824	-0.143668	0.0369819	0.397318	1.47312	ENSRNOT00000009104	RGD1304792_predicted	PREDICTED: Rattus norvegicus similar to chromosome 2 open reading frame 3; transcription factor 9 (binds GC-rich sequences) (predicted) (RGD1304792_predicted), mRNA [XM_232102]		FALSE
A_44_P112570	0.0452589	0.00587625	-0.0540618	-0.285709	0.286757	0.324752	0.78392	XM_220134	XM_220134	Rattus norvegicus similar to Rpl7a protein (LOC302904), mRNA [XM_220134]	XM_220134	FALSE
A_42_P674683	0.0183712	0.00118933	-0.021768	0.278677	0.723172	0.922942	1.13456	NM_133539	Mrpl17	Rattus norvegicus mitochondrial ribosomal protein L17 (Mrpl17), mRNA [NM_133539]	NM_133539	FALSE
A_43_P13046	0.0454211	0.00591982	-0.384676	0.238008	0.384729	0.344283	-0.151209	NM_057147	Sec22l2	Rattus norvegicus sec22 homolog (Sec22l2), mRNA [NM_057147]	NM_057147	FALSE
A_43_P17793	0.0166158	0.000970133	-0.156913	0.367086	0.621699	0.884698	1.14956	ENSRNOT00000005084	Angel2_predicted	Rattus norvegicus similar to D1Ertd396e protein (LOC305035), mRNA [XM_223023]		FALSE
A_44_P137742	0.00519245	8.20196e-05	-0.393626	-0.1067	0.639533	0.82307	1.06054	ENSRNOT00000056798	RGD1311005_predicted	PREDICTED: Rattus norvegicus similar to J-type co-chaperone HSC20 (predicted) (RGD1311005_predicted), mRNA [XM_341099]		FALSE
A_44_P555253	0.0382189	0.00433137	0.261135	0.895476	1.14556	1.50635	1.34006	NM_022934	Dnaja1	Rattus norvegicus DnaJ (Hsp40) homolog, subfamily A, member 1 (Dnaja1), mRNA [NM_022934]	NM_022934	FALSE
A_44_P156741	0.0248845	0.00203841	-0.370064	-0.0408698	0.289383	0.396113	0.40922	NM_001014136	Ngly1	Rattus norvegicus N-glycanase 1 (Ngly1), mRNA [NM_001014136]	NM_001014136	FALSE
A_44_P881890	0.0401206	0.00471567	0.0491225	0.11405	0.134958	-0.137319	-0.736074	CX571111	CX571111	RVL2359 Wackym-Soares normalized rat vestibular cDNA library Rattus norvegicus cDNA 5', mRNA sequence [CX571111]	CX571111	FALSE
A_44_P266705	0.0237333	0.00188965	-0.205701	-0.102844	0.327308	0.440055	0.889798	NM_001014141	RGD1309341	Rattus norvegicus similar to hypothetical protein FLJ38482 (RGD1309341), mRNA [NM_001014141]	NM_001014141	FALSE
A_44_P429469	0.0396239	0.00462427	0.11255	0.401512	0.736488	0.896472	0.97242	ENSRNOT00000002182	Hemk2_predicted	PREDICTED: Rattus norvegicus HemK methyltransferase family member 2 (predicted) (Hemk2_predicted), mRNA [XM_213675]		FALSE
A_44_P405618	0.0232296	0.00181836	-0.208875	-0.567501	-0.623928	-0.927109	-3.04375	ENSRNOT00000025426	RGD1561090_predicted	Rattus norvegicus similar to protein tyrosine phosphatase, receptor type, D isoform 3 precursor; protein tyrosine phosphatase, receptor type, delta polypeptide; protein tyrosine phosphatase delta (LOC313278), mRNA [XM_233065]		FALSE
A_43_P11776	0.010261	0.000362636	-1.32073	-1.35847	0.260762	0.523953	0.871929	NM_017014	Gstm1	Rattus norvegicus glutathione S-transferase, mu 1 (Gstm1), mRNA [NM_017014]	NM_017014	FALSE
A_44_P821841	0.0298338	0.00280682	-0.202681	0.229786	0.539937	0.758282	0.958385	A_44_P821841	A_44_P821841			FALSE
A_44_P380243	0.0254258	0.00210039	-0.555395	-0.0254632	0.0955872	0.0283024	0.0826852	A_44_P380243	A_44_P380243			FALSE
A_42_P842946	0.00478341	5.88085e-05	0.0949532	-0.0793468	0.167363	0.586393	2.40237	NM_001025732	Nol5a	Rattus norvegicus nucleolar protein 5A (Nol5a), mRNA [NM_001025732]	NM_001025732	FALSE
A_44_P763137	0.0144356	0.000731518	-0.1319	0.223869	0.180248	0.347006	0.724077	TC603530	TC603530			FALSE
A_44_P929812	0.0153595	0.000825506	0.053687	-0.338135	-0.0470303	0.147141	0.787693	XM_001079869	LOC691853	PREDICTED: Rattus norvegicus similar to COX10 homolog, cytochrome c oxidase assembly protein, heme A: farnesyltransferase (LOC691853), mRNA [XM_001079869]	XM_001079869	FALSE
A_43_P17196	0.0176019	0.00109713	0.194922	0.0820493	0.322669	0.699679	1.70762	ENSRNOT00000021677	RGD1562114_predicted	PREDICTED: Rattus norvegicus RGD1562114 (predicted) (RGD1562114_predicted), mRNA [XM_576184]		FALSE
A_44_P522336	0.0301712	0.0028727	-0.0474631	0.233212	0.598414	0.740804	1.16562	NM_053616	Nup88	Rattus norvegicus nucleoporin 88 (Nup88), mRNA [NM_053616]	NM_053616	FALSE
A_44_P511324	0.0139083	0.000687287	-0.301755	0.0256996	0.357414	0.572843	0.766566	NM_053982	Rps15a	Rattus norvegicus ribosomal protein S15a (Rps15a), mRNA [NM_053982]	NM_053982	FALSE
A_44_P459870	0.0460723	0.00609249	-0.200727	-0.242809	0.0500108	0.362948	0.492262	ENSRNOT00000046594	RGD1310348_predicted	PREDICTED: Rattus norvegicus similar to Ser [XM_341010]		FALSE
A_44_P538165	0.00445197	5.10401e-05	-0.280307	-0.312462	-0.198083	0.552823	1.9644	NM_001013138	Fbxo23	Rattus norvegicus F-box only protein 23 (Fbxo23), mRNA [NM_001013138]	NM_001013138	FALSE
A_44_P520475	0.017681	0.00111904	-0.477347	0.254223	0.288001	0.661987	1.09383	NM_001013200	Anp32e	Rattus norvegicus acidic (leucine-rich) nuclear phosphoprotein 32 family, member E (Anp32e), mRNA [NM_001013200]	NM_001013200	FALSE
A_44_P523170	0.00334576	2.92814e-05	-0.135121	0.312635	0.760909	1.02929	0.988822	A_44_P523170	A_44_P523170			FALSE
A_44_P149734	0.0260079	0.0022026	-0.58811	0.397795	0.812188	0.770612	0.317819	NM_001009657	Hat1	Rattus norvegicus histone aminotransferase 1 (Hat1), mRNA [NM_001009657]	NM_001009657	FALSE
A_43_P21699	0.0376125	0.00421474	-0.880745	-0.130774	0.316296	0.384846	0.26161	NM_001005883	Pi4k2b	Rattus norvegicus phosphatidylinositol 4-kinase type 2 beta (Pi4k2b), mRNA [NM_001005883]	NM_001005883	FALSE
A_44_P762003	0.0291404	0.0026996	0.1764	0.172641	0.29249	0.354121	1.27996	TC603145	TC603145			FALSE
A_44_P546537	0.0103075	0.000369086	0.0661715	0.26326	-0.118764	-0.426234	-1.40104	NM_021663	Nucb2	Rattus norvegicus nucleobindin 2 (Nucb2), mRNA [NM_021663]	NM_021663	FALSE
A_44_P325666	0.00548875	9.60729e-05	0.00432062	0.0922825	-0.166987	-0.537692	-2.01724	NM_012730	Cyp2d26	Rattus norvegicus cytochrome P450, family 2, subfamily d, polypeptide 26 (Cyp2d26), mRNA [NM_012730]	NM_012730	FALSE
A_43_P12557	0.0179572	0.00115089	0.130843	0.467076	0.976285	1.10576	1.12662	NM_031335	Polr2f	Rattus norvegicus polymerase (RNA) II (DNA directed) polypeptide F (Polr2f), mRNA [NM_031335]	NM_031335	FALSE
A_44_P325376	0.00922436	0.00029219	-0.0421535	0.177784	0.392236	0.668533	1.24507	XM_574706	LOC499391	PREDICTED: Rattus norvegicus similar to gem (nuclear organelle) associated protein 7 (LOC499391), mRNA [XM_574706]	XM_574706	FALSE
A_44_P283546	0.0299106	0.00281564	-0.0235024	0.172711	0.600435	0.589849	0.702773	NM_031709	Rps12	Rattus norvegicus ribosomal protein S12 (Rps12), mRNA [NM_031709]	NM_031709	FALSE
A_44_P499242	0.0110746	0.000421457	-0.0843471	-0.128998	0.134511	0.403472	0.963396	XM_226008	XM_226008	Rattus norvegicus similar to histidyl-tRNA synthetase (LOC307492), mRNA [XM_226008]	XM_226008	FALSE
A_44_P288156	0.00579209	0.000106946	-0.290961	-0.307649	0.324149	0.809038	1.72423	NM_019170	Cbr1	Rattus norvegicus carbonyl reductase 1 (Cbr1), mRNA [NM_019170]	NM_019170	FALSE
A_44_P975286	0.0152203	0.000814664	-0.712552	0.00568604	0.464332	0.799768	0.766815	CO403766	CO403766	AGENCOURT_26747151 NIH_MGC_255 Rattus norvegicus cDNA clone IMAGE:7318617 5', mRNA sequence [CO403766]	CO403766	FALSE
A_44_P659530	0.0335019	0.00346837	0.241672	-0.157274	0.0124351	-0.40527	-2.10232	BM986371	BM986371	EST531151 Rat gene index, normalized rat, norvegicus Rattus norvegicus cDNA clone RGIAA19 5' end, mRNA sequence [BM986371]	BM986371	FALSE
A_44_P383928	0.0141066	0.000701604	0.438171	0.626262	0.192361	-0.191184	-1.55742	NM_053493	Phyh2	Rattus norvegicus phytanoyl-CoA 2-hydroxylase 2 (Phyh2), mRNA [NM_053493]	NM_053493	FALSE
A_44_P1013894	0.0105805	0.00038451	-0.317759	0.197924	0.57566	0.936633	1.06455	AW918228	AW918228	AW918228 EST349532 Rat gene index, normalized rat, norvegicus, Bento Soares Rattus norvegicus cDNA clone RGIEO11 5' end, mRNA sequence [AW918228]	AW918228	FALSE
A_44_P157134	0.00817001	0.000224099	-0.476403	-0.308134	1.26262	1.38938	2.22342	ENSRNOT00000010894	Anxa13_predicted	PREDICTED: Rattus norvegicus annexin A13 (predicted) (Anxa13_predicted), mRNA [XM_343245]		FALSE
A_44_P1000875	0.00699611	0.000154191	0.692984	0.240014	0.133705	0.107359	-0.371424	AY100477	Ntel1	Rattus norvegicus liver NTE-related protein mRNA, complete cds. [AY100477]	AY100477	FALSE
A_42_P525170	0.031165	0.00306345	1.49063	1.07688	1.17821	0.6743	-1.22508	NM_033352	Abcd2	Rattus norvegicus ATP-binding cassette, sub-family D (ALD), member 2 (Abcd2), mRNA [NM_033352]	NM_033352	FALSE
A_44_P929119	0.0310262	0.00303656	-0.119417	-0.0822592	0.430516	0.469389	0.978613	XM_575626	RGD1560353_predicted	PREDICTED: Rattus norvegicus similar to 60S ribosomal protein L13 (predicted) (RGD1560353_predicted), mRNA [XM_575626]	XM_575626	FALSE
A_44_P973249	0.00253917	8.15688e-06	-0.0357543	-0.144308	0.321094	0.579407	1.32866	XM_230950	Itgav_predicted	PREDICTED: Rattus norvegicus integrin alpha V (predicted) (Itgav_predicted), mRNA [XM_230950]	XM_230950	FALSE
A_44_P142472	0.0205733	0.00144811	0.105302	0.21201	0.600787	0.656293	1.21705	ENSRNOT00000026271	RGD1308064_predicted	PREDICTED: Rattus norvegicus similar to FKSG24 (predicted) (RGD1308064_predicted), mRNA [XM_214293]		FALSE
A_44_P1020640	0.0032633	2.79135e-05	0.365103	0.703288	1.11026	1.44888	1.74556	ENSRNOT00000026827	Dus2l_predicted	PREDICTED: Rattus norvegicus dihydrouridine synthase 2-like, SMM1 homolog (S. cerevisiae) (predicted) (Dus2l_predicted), mRNA [XM_214665]		FALSE
A_44_P412843	0.0202573	0.00142155	-0.224966	0.356622	0.599501	0.747792	1.41107	XR_009002	RGD1561463_predicted	PREDICTED: Rattus norvegicus similar to Sfrs7 protein (predicted) (RGD1561463_predicted), mRNA [XR_009002]	XR_009002	FALSE
A_42_P580618	0.0250772	0.00206222	-0.285398	-0.149495	0.116185	-0.0335934	0.846852	NM_021741	Ip63	Rattus norvegicus IP63 protein (Ip63), mRNA [NM_021741]	NM_021741	FALSE
A_44_P542249	0.0335671	0.00348049	-0.0420555	0.21602	0.477224	0.689128	1.19068	BQ190629	BQ190629	BQ190629 UI-R-DN1-ckh-d-14-0-UI.s1 UI-R-DN1 Rattus norvegicus cDNA clone UI-R-DN1-ckh-d-14-0-UI 3', mRNA sequence [BQ190629]	BQ190629	FALSE
A_44_P239171	0.0171673	0.00104961	-0.0158173	0.161637	0.712057	0.84785	0.940404	NM_021264	Rpl35a	Rattus norvegicus ribosomal protein L35a (Rpl35a), mRNA [NM_021264]	NM_021264	FALSE
A_44_P407787	0.0183458	0.00118363	0.0775114	0.102837	0.63235	0.747555	0.756225	ENSRNOT00000022196	Edf1_predicted	Endothelial differentiation-related factor 1 (EDF-1) (Multiprotein- bridging factor 1) (MBF1) (Calmodulin-associated peptide 19) (CAP-19). [Source:Uniprot/SWISSPROT;Acc:P69736] [ENSRNOT00000022196]		FALSE
A_44_P745585	0.0211166	0.00152016	-0.0335721	-0.512748	-0.0632971	0.000445962	0.717812	NM_001024309	LOC499749	Rattus norvegicus similar to RIKEN cDNA C430004E15 (LOC499749), mRNA [NM_001024309]	NM_001024309	FALSE
A_44_P140520	0.0268259	0.00234139	-0.24554	0.133072	0.589981	0.711526	0.689473	NM_001011995	Tuba6	Rattus norvegicus tubulin, alpha 6 (Tuba6), mRNA [NM_001011995]	NM_001011995	FALSE
A_42_P509843	0.010241	0.000356323	-0.108457	0.192233	0.47796	0.709725	0.870703	ENSRNOT00000020405	Tradd	Tumor necrosis factor receptor type 1 associated death domain-like protein (Fragment). [Source:Uniprot/SPTREMBL;Acc:Q8K3Z8] [ENSRNOT00000020405]		FALSE
A_42_P714075	0.0279529	0.00251084	-0.220511	0.252249	0.597544	0.73813	0.205935	NM_031723	Sec11l1	Rattus norvegicus Sec11-like 1 (S. cerevisiae) (Sec11l1), mRNA [NM_031723]	NM_031723	FALSE
A_44_P168335	0.0181565	0.00116948	-0.0576237	0.0289458	0.426811	0.561717	0.881093	XM_341734	XM_341734	Rattus norvegicus similar to 40S ribosomal protein S10 (LOC361456), mRNA [XM_341734]	XM_341734	FALSE
A_44_P320839	0.0110687	0.00041956	0.271988	0.229888	0.660188	0.996977	1.61201	NM_053500	Slc25a27	Rattus norvegicus solute carrier family 25, member 27 (Slc25a27), mRNA [NM_053500]	NM_053500	FALSE
A_44_P206284	0.0315542	0.00315761	-0.871334	0.212521	0.172904	-0.089681	-1.8907	XM_217496	RGD1566215_predicted	PREDICTED: Rattus norvegicus similar to Coatomer gamma-2 subunit (Gamma-2 coat protein) (Gamma-2 COP) (predicted) (RGD1566215_predicted), mRNA [XM_217496]	XM_217496	FALSE
A_44_P560038	0.0333041	0.00343869	0.089801	0.115994	0.660738	0.759698	0.920394	ENSRNOT00000039062	ENSRNOT00000039062			FALSE
A_44_P131046	0.00532679	8.89895e-05	0.0371819	-0.0525231	0.399009	0.569438	0.88253	XR_007638	RGD1560105_predicted	PREDICTED: Rattus norvegicus similar to 40S ribosomal protein S19 (predicted) (RGD1560105_predicted), mRNA [XR_007638]	XR_007638	FALSE
A_44_P370082	0.0305005	0.00292	0.0732862	0.176692	0.552348	0.670396	0.941314	ENSRNOT00000010778	Timm22	Mitochondrial import inner membrane translocase subunit Tim22. [Source:Uniprot/SWISSPROT;Acc:Q9JKW1] [ENSRNOT00000010778]		FALSE
A_44_P525250	0.0396239	0.0046238	0.367934	0.820578	0.941883	0.659428	-0.93584	XM_227370	RGD1560208_predicted	PREDICTED: Rattus norvegicus similar to Farnesyl pyrophosphate synthetase (FPP synthetase) (predicted) (RGD1560208_predicted), mRNA [XM_227370]	XM_227370	FALSE
A_43_P12219	0.0201222	0.00139489	0.164466	0.452187	0.477192	0.361193	-0.539613	NM_022390	Qdpr	Rattus norvegicus quinoid dihydropteridine reductase (Qdpr), mRNA [NM_022390]	NM_022390	FALSE
A_44_P466189	0.0454211	0.00591296	0.58814	0.774551	0.459452	0.162923	-1.00503	NM_133569	Angptl2	Rattus norvegicus angiopoietin-like 2 (Angptl2), mRNA [NM_133569]	NM_133569	FALSE
A_44_P511079	0.0367506	0.00402539	-0.13619	0.293146	0.672404	0.941363	0.897408	ENSRNOT00000018508	RGD1309020	Rattus norvegicus similar to RIKEN cDNA 6530403A03 (predicted), mRNA (cDNA clone IMAGE:7321837) [BC088167]		FALSE
A_43_P17703	0.010261	0.000363253	0.411261	0.904152	0.942169	1.2991	2.19869	NM_001017449	Dph5	Rattus norvegicus DPH5 homolog (S. cerevisiae) (Dph5), mRNA [NM_001017449]	NM_001017449	FALSE
A_44_P248651	0.0148584	0.00078102	-0.119727	-0.347634	0.271619	0.578625	1.09574	ENSRNOT00000006314	ENSRNOT00000006314	Mitochondrial import inner membrane translocase subunit TIM16 (Mitochondria-associated granulocyte macrophage CSF-signaling molecule). [Source:Uniprot/SWISSPROT;Acc:Q6EIX2] [ENSRNOT00000033244]		FALSE
A_42_P736573	0.0386852	0.0044403	0.616673	-0.0381547	-0.293339	-0.0719867	-0.881285	AI031053	AI031053	UI-R-C0-jp-f-11-0-UI.s1 UI-R-C0 Rattus norvegicus cDNA clone UI-R-C0-jp-f-11-0-UI 3', mRNA sequence [AI031053]	AI031053	FALSE
A_44_P975554	0.044728	0.00576673	0.228432	0.065358	0.227217	-0.19697	-1.3825	TC599199	TC599199			FALSE
A_44_P196347	0.0163386	0.000943948	-0.142399	0.00736284	0.449254	0.528308	0.699535	ENSRNOT00000016254	ENSRNOT00000016254	similar to Serum amyloid A-3 protein precursor (LOC691143), mRNA [Source:RefSeq_dna;Acc:XR_007025] [ENSRNOT00000016254]		FALSE
A_43_P16831	0.0271465	0.00238757	0.166579	0.738086	1.12492	1.33317	1.01859	XM_232055	XM_232055	Rattus norvegicus similar to inner membrane protein, mitochondrial (mitofilin); motor protein (LOC312444), mRNA [XM_232055]	XM_232055	FALSE
A_44_P321532	0.017339	0.00106963	-0.0334574	0.168812	0.271124	-0.0772736	-1.13767	NM_001009385	RGD1311384	Rattus norvegicus similar to apolipoprotein F-like (RGD1311384), mRNA [NM_001009385]	NM_001009385	FALSE
A_44_P515855	0.0226899	0.00171714	-0.504491	-0.335721	0.355795	0.725429	0.842986	XM_226343	XM_226343	Rattus norvegicus similar to CCT (chaperonin containing TCP-1) gamma subunit (LOC307752), mRNA [XM_226343]	XM_226343	FALSE
A_44_P236876	0.0355753	0.00381212	-0.64331	0.00697505	0.178869	0.357978	0.297638	XM_001053109	LOC678715	PREDICTED: Rattus norvegicus similar to MORF-related gene X (LOC678715), mRNA [XM_001053109]	XM_001053109	FALSE
A_44_P349702	0.0440302	0.00560158	0.0496417	0.0881499	0.46065	0.623775	0.806454	BI289146	BI289146	UI-R-DK0-cfm-a-08-0-UI.s1 UI-R-DK0 Rattus norvegicus cDNA clone UI-R-DK0-cfm-a-08-0-UI 3', mRNA sequence [BI289146]	BI289146	FALSE
A_44_P220112	0.0212992	0.00154126	-0.14037	0.0702341	0.469809	0.591759	0.656274	XR_006813	LOC293712	PREDICTED: Rattus norvegicus similar to 60S ribosomal protein L7 (LOC293712), mRNA [XR_006813]	XR_006813	FALSE
A_44_P527611	0.0237019	0.00187694	-0.448259	-0.11893	0.239063	0.276594	0.396825	ENSRNOT00000020405	Tradd	Tumor necrosis factor receptor type 1 associated death domain-like protein (Fragment). [Source:Uniprot/SPTREMBL;Acc:Q8K3Z8] [ENSRNOT00000020405]		FALSE
A_44_P310596	0.0269734	0.0023621	-0.503961	0.0245668	-0.0729287	-0.268033	-1.63798	NM_001014166	RGD1311155	Rattus norvegicus similar to RIKEN cDNA 9230117N10 (RGD1311155), mRNA [NM_001014166]	NM_001014166	FALSE
A_44_P455080	0.00922436	0.000292399	-0.292156	0.186857	0.146964	0.520818	1.34035	ENSRNOT00000007549	Pwp1_predicted	similar to periodic tryptophan protein 1 homolog (LOC365418), mRNA [Source:RefSeq_dna;Acc:XR_009168] [ENSRNOT00000007549]		FALSE
A_43_P12584	0.012164	0.000516055	0.32476	0.318601	0.528015	0.741303	1.21838	NM_031553	Nfyb	Rattus norvegicus nuclear transcription factor-Y beta (Nfyb), mRNA [NM_031553]	NM_031553	FALSE
A_44_P382727	0.020155	0.00140146	-0.309133	0.256345	0.236271	0.11653	-0.752561	ENSRNOT00000014734	RGD1566215_predicted	CB581640 AMGNNUC:NRHY3-00128-B6-A W Rat hypothalamus (10735) Rattus norvegicus cDNA clone nrhy3-00128-b6 5', mRNA sequence [CB581640]		FALSE
A_44_P377492	0.0347432	0.00364873	-0.117656	0.0516151	0.263709	0.490488	0.67279	ENSRNOT00000017756	Dctn6_predicted	PREDICTED: Rattus norvegicus dynactin 6 (predicted) (Dctn6_predicted), mRNA [XM_214362]		FALSE
A_44_P558173	0.0034568	3.19134e-05	0.0982214	0.0919155	0.760968	1.11589	1.52364	ENSRNOT00000003931	Mrpl55_predicted	PREDICTED: Rattus norvegicus mitochondrial ribosomal protein L55 (predicted) (Mrpl55_predicted), mRNA [XM_213321]		FALSE
A_44_P1040710	0.0228066	0.00173675	0.0651244	0.0577405	0.0493798	0.280939	1.17662	XM_001073671	LOC690208	PREDICTED: Rattus norvegicus hypothetical protein LOC690208 (LOC690208), mRNA [XM_001073671]	XM_001073671	FALSE
A_43_P12821	0.0205897	0.00145037	0.0777442	-0.0931401	0.708514	0.768097	0.696081	NM_053482	Spa17	Rattus norvegicus sperm autoantigenic protein 17 (Spa17), mRNA [NM_053482]	NM_053482	FALSE
A_44_P318718	0.0387696	0.00445584	0.447308	-0.366553	-0.0243267	-0.289402	-0.293629	ENSRNOT00000000901	ENSRNOT00000000901	PREDICTED: Rattus norvegicus similar to OTTHUMP00000028561 (predicted) (RGD1560125_predicted), mRNA [XM_346920]		FALSE
A_44_P398641	0.0496359	0.00685246	1.28368	0.212612	-0.258372	0.168194	0.171944	XM_217515	XM_217515	Rattus norvegicus similar to RIKEN cDNA 4933431D05 (LOC301986), mRNA [XM_217515]	XM_217515	FALSE
A_42_P716553	0.00542831	9.38067e-05	0.088416	-0.253497	0.113746	0.304536	0.880385	ENSRNOT00000026092	Rhod_predicted	PREDICTED: Rattus norvegicus ras homolog gene family, member D (predicted) (Rhod_predicted), mRNA [XM_215193]		FALSE
A_44_P372501	0.0401206	0.00471316	0.42416	0.282002	-0.131027	-0.19261	-1.27365	NM_031834	Sult1a1	Rattus norvegicus sulfotransferase family 1A, phenol-preferring, member 1 (Sult1a1), mRNA [NM_031834]	NM_031834	FALSE
A_44_P331142	0.0198485	0.00136426	-0.64482	-0.101145	-0.149937	0.0560125	1.27607	BC086519	BC086519	Rattus norvegicus cDNA clone IMAGE:7302535, with apparent retained intron [BC086519]	BC086519	FALSE
A_44_P698234	0.0434982	0.00548284	-0.387599	0.248743	0.252364	0.137102	-1.90138	NM_017158	Cyp2c7	Rattus norvegicus cytochrome P450, family 2, subfamily c, polypeptide 7 (Cyp2c7), mRNA [NM_017158]	NM_017158	FALSE
A_44_P483358	0.0286866	0.00262813	-0.149342	0.149236	0.54768	0.754826	1.12102	BG666558	BG666558	BG666558 DRABND04 Rat DRG Library Rattus norvegicus cDNA clone DRABND04 5', mRNA sequence [BG666558]	BG666558	FALSE
A_44_P226859	0.0307365	0.00297451	0.722728	0.208378	-0.00661445	-0.28941	-1.02756	M35602	Fgb	RATFIBBA Rat beta-fibrinogen mRNA, 3' end [M35602]	M35602	FALSE
A_44_P332694	0.0251961	0.00207738	-0.139962	0.15969	0.516328	0.712234	0.914006	NM_001013115	Guk1	Rattus norvegicus guanylate kinase 1 (Guk1), mRNA [NM_001013115]	NM_001013115	FALSE
A_43_P16697	0.0468863	0.00625517	0.506583	1.04957	1.37753	1.59908	1.75041	XM_576227	RGD1564876_predicted	PREDICTED: Rattus norvegicus similar to Solute carrier family 35, member E3 (predicted) (RGD1564876_predicted), mRNA [XM_576227]	XM_576227	FALSE
A_43_P12701	0.00794473	0.000208698	-0.217991	-0.0278223	-0.232898	-0.553455	-1.87113	NM_031839	Cyp2c23	Rattus norvegicus arachidonic acid epoxygenase (Cyp2c23), mRNA [NM_031839]	NM_031839	FALSE
A_44_P215775	0.0320335	0.00323087	-0.276339	0.019482	0.035223	-0.19508	-0.774368	ENSRNOT00000044327	ENSRNOT00000044327	AGENCOURT_66963306 NIH_MGC_366 Rattus norvegicus cDNA clone IMAGE:8368097 5', mRNA sequence [DY311079]		FALSE
A_44_P366056	0.034631	0.00361544	-0.66846	-0.0949326	0.334856	0.47573	0.806078	ENSRNOT00000023178	Mmachc_predicted	PREDICTED: Rattus norvegicus methylmalonic aciduria (cobalamin deficiency) cblC type, with homocystinuria (predicted) (Mmachc_predicted), mRNA [XM_233418]		FALSE
A_43_P11702	0.0158066	0.0008646	-0.223687	-0.00845867	-0.204861	-0.59727	-1.69972	NM_013084	Acadsb	Rattus norvegicus acyl-Coenzyme A dehydrogenase, short/branched chain (Acadsb), mRNA [NM_013084]	NM_013084	FALSE
A_44_P137981	0.0108589	0.000406995	-0.101021	0.0398783	0.402362	0.584867	1.31807	XR_005922	LOC307465	PREDICTED: Rattus norvegicus similar to karyopherin (importin) alpha 2 (LOC307465), mRNA [XR_005922]	XR_005922	FALSE
A_44_P491909	0.044176	0.00564135	-0.694015	-0.0812604	0.394209	0.632158	0.786661	NM_199372	Eif4a1	Rattus norvegicus eukaryotic translation initiation factor 4A1 (Eif4a1), mRNA [NM_199372]	NM_199372	FALSE
A_44_P1040889	0.0239821	0.00192225	-0.112506	0.418949	0.611347	0.936813	1.65243	XM_216893	Cpsf6_predicted	PREDICTED: Rattus norvegicus cleavage and polyadenylation specific factor 6, 68kDa (predicted) (Cpsf6_predicted), mRNA [XM_216893]	XM_216893	FALSE
A_44_P288997	0.00905369	0.000278287	0.183	0.187752	0.709596	0.88539	1.31781	AW916759	AW916759	AW916759 EST348167 Rat gene index, normalized rat, norvegicus, Bento Soares Rattus norvegicus cDNA clone RGIDV89 5' end, mRNA sequence [AW916759]	AW916759	FALSE
A_44_P622201	0.000995426	4.74701e-07	-0.177348	-0.125949	0.678377	1.31591	2.48769	BC098778	BC098778	Rattus norvegicus cDNA clone IMAGE:7374368 [BC098778]	BC098778	FALSE
A_44_P773350	0.0439224	0.00558552	-0.00114548	-0.135361	-0.0825589	0.173116	0.755468	CO386862	CO386862	AGENCOURT_26621791 NIH_MGC_253 Rattus norvegicus cDNA clone IMAGE:7302708 5', mRNA sequence [CO386862]	CO386862	FALSE
A_42_P672401	0.0124045	0.000536188	0.428976	0.0691849	0.310955	0.669142	1.70012	NM_001013249	Dhx30	Rattus norvegicus DEAH (Asp-Glu-Ala-His) box polypeptide 30 (Dhx30), mRNA [NM_001013249]	NM_001013249	FALSE
A_44_P853167	0.0121445	0.000513932	-0.291715	-0.0445759	0.236144	0.433065	0.583688	TC591704	TC591704			FALSE
A_44_P143223	0.0373673	0.00416107	-0.631968	0.0544838	-0.0675726	-0.412279	-1.30783	CB606387	CB606387	CB606387 AMGNNUC:SRVC1-00110-F2-A srvc1 (10901) Rattus norvegicus cDNA clone srvc1-00110-f2 5', mRNA sequence [CB606387]	CB606387	FALSE
A_43_P10662	0.0401625	0.00473511	0.086364	0.482714	0.842796	0.795274	0.511963	ENSRNOT00000023211	RGD1307896_predicted	PREDICTED: Rattus norvegicus similar to cisplatin resistance related protein CRR9p (predicted) (RGD1307896_predicted), mRNA [XM_229475]		FALSE
A_44_P728932	0.0311933	0.00308787	-0.239754	0.127645	0.491853	0.53536	0.567614	ENSRNOT00000028742	ENSRNOT00000028742			FALSE
A_43_P12333	0.0421992	0.00521325	-0.585699	0.264587	0.190468	0.51994	0.570515	NM_022921	RT1-M3	Rattus norvegicus RT1 class Ib, locus M3 (RT1-M3), mRNA [NM_022921]	NM_022921	FALSE
A_44_P314386	0.00542831	9.37364e-05	0.643915	0.716365	0.0768114	-0.497828	-2.00481	XM_243588	Cohh1_predicted	PREDICTED: Rattus norvegicus Cohen syndrome homolog 1 (predicted) (Cohh1_predicted), mRNA [XM_243588]	XM_243588	FALSE
A_44_P637586	0.0163386	0.000940722	-0.186987	-0.2741	0.37375	0.571329	0.54124	BC086562	BC086562	Rattus norvegicus cDNA clone IMAGE:7307013 [BC086562]	BC086562	FALSE
A_44_P161266	0.0112154	0.000440015	-0.0486499	0.197227	0.753386	0.898113	1.11275	ENSRNOT00000047908	ENSRNOT00000047908			FALSE
A_43_P16155	0.0314105	0.00312948	-0.088655	-0.026128	0.00514668	0.308649	0.760889	ENSRNOT00000014604	Braf	V-raf murine sarcoma viral oncogene B1-like protein (Fragment). [Source:Uniprot/SPTREMBL;Acc:Q99MC6] [ENSRNOT00000014604]		FALSE
A_44_P751206	0.0347774	0.00366135	0.191262	0.52105	0.651564	1.16939	1.5227	AI236146	AI236146	AI236146 EST232708 Normalized rat ovary, Bento Soares Rattus sp. cDNA clone ROVDB96 3' end, mRNA sequence [AI236146]	AI236146	FALSE
A_44_P537006	0.0172935	0.00106406	0.338709	0.40578	0.31015	0.0419681	-1.81777	ENSRNOT00000018003	RGD1308677_predicted	PREDICTED: Rattus norvegicus similar to RIKEN cDNA C630028N24 gene (predicted) (RGD1308677_predicted), mRNA [XM_236254]		FALSE
A_44_P700187	0.0292714	0.00272423	-0.116197	0.352662	0.229227	0.529404	1.18081	TC603712	TC603712			FALSE
A_44_P1055052	0.0235958	0.00185855	-0.246679	-0.431404	-0.142516	0.192657	1.1796	ENSRNOT00000024938	ENSRNOT00000024938	similar to nucleolar protein 1 (LOC367748), mRNA [Source:RefSeq_dna;Acc:XR_005684] [ENSRNOT00000024938]		FALSE
A_43_P18817	0.0498913	0.00692499	-0.802029	-0.181588	0.162895	0.303276	0.348969	ENSRNOT00000010245	LOC684302	Rattus norvegicus similar to NGD5 protein homolog (CGI-53) (LOC362265), mRNA [XM_342571]		FALSE
A_42_P499859	0.0128478	0.000583539	-0.238744	-0.152238	0.261935	0.433138	1.14013	NM_001003654	Pard6a	Rattus norvegicus par-6 (partitioning defective 6,) homolog alpha (C. elegans) (Pard6a), transcript variant 2, mRNA [NM_001003654]	NM_001003654	FALSE
A_44_P1052361	0.0452616	0.00588142	0.0452698	0.24206	0.49356	0.328342	-0.518079	NM_001011952	Slc39a8	Rattus norvegicus solute carrier family 39 (metal ion transporter), member 8 (Slc39a8), mRNA [NM_001011952]	NM_001011952	FALSE
A_44_P210431	0.0359353	0.0038735	0.194148	-0.0593207	0.375086	0.56821	0.935811	AF218849	Spnb1	Rattus norvegicus beta II spectrin-short isoform mRNA, partial cds. [AF218849]	AF218849	FALSE
A_42_P514733	0.0279431	0.00250619	0.0413351	0.453665	0.419723	0.581811	1.35334	XM_575221	RGD1562232_predicted	PREDICTED: Rattus norvegicus similar to microfibrillar-associated protein 1 (predicted) (RGD1562232_predicted), mRNA [XM_575221]	XM_575221	FALSE
A_43_P21564	0.0385368	0.00441531	-0.0727415	-0.132509	0.338684	0.640144	2.12253	NM_181084	Trp53inp1	Rattus norvegicus transformation related protein 53 inducible nuclear protein 1 (Trp53inp1), mRNA [NM_181084]	NM_181084	FALSE
A_44_P215880	0.0473572	0.00635339	-0.078968	-0.48371	-0.265007	-0.512468	-1.71851	ENSRNOT00000005039	Rilp_predicted	PREDICTED: Rattus norvegicus Rab interacting lysosomal protein (predicted) (Rilp_predicted), mRNA [XM_213380]		FALSE
A_42_P722646	0.0243887	0.00198348	0.323599	0.0755049	0.364062	0.553904	1.05399	XM_343330	RGD1565411_predicted	PREDICTED: Rattus norvegicus similar to 2610317D23Rik protein (predicted) (RGD1565411_predicted), mRNA [XM_343330]	XM_343330	FALSE
A_44_P284859	0.0128478	0.000590273	0.0202295	0.210844	0.425183	0.707438	1.01449	ENSRNOT00000038432	Htatsf1_predicted	PREDICTED: Rattus norvegicus HIV TAT specific factor 1 (predicted) (Htatsf1_predicted), mRNA [XM_229199]		FALSE
A_43_P18742	0.0112154	0.0004405	-0.225277	0.206583	0.517096	0.879427	1.95978	ENSRNOT00000000717	Bxdc1_predicted	PREDICTED: Rattus norvegicus brix domain containing 1 (predicted) (Bxdc1_predicted), mRNA [XM_215404]		FALSE
A_44_P219788	0.0191696	0.00128997	0.24918	0.173071	0.540036	0.822368	1.1835	NM_001033866	Surf2	Rattus norvegicus surfeit 2 (Surf2), mRNA [NM_001033866]	NM_001033866	FALSE
A_43_P16515	0.00679228	0.000148211	0.418283	-0.587542	0.309225	0.839108	2.03428	XM_215130	XM_215130	Rattus norvegicus hypothetical LOC293634 (LOC293634), mRNA [XM_215130]	XM_215130	FALSE
A_44_P928726	0.00708522	0.000158264	-0.162562	0.128097	0.00496411	-0.110352	-0.810816	ENSRNOT00000029294	ENSRNOT00000029294	Cfh protein. [Source:Uniprot/SPTREMBL;Acc:Q5FVP9] [ENSRNOT00000036886]		FALSE
A_42_P706230	0.0048426	6.43475e-05	0.746465	1.08029	0.565487	0.326001	-2.14276	XM_239260	Sez6	PREDICTED: Rattus norvegicus seizure related 6 homolog (mouse) (Sez6), mRNA [XM_239260]	XM_239260	FALSE
A_44_P1009594	0.0202569	0.00141482	-1.52335	-0.52301	0.190242	0.308586	0.134486	NM_001024232	Cyp3a62	Rattus norvegicus cytochrome P450, subfamily 3A, polypeptide 62 (Cyp3a62), mRNA [NM_001024232]	NM_001024232	FALSE
A_44_P474755	0.0191807	0.00129248	0.745295	0.467038	0.356462	0.260538	-0.134251	NM_001011959	Ppgb	Rattus norvegicus protective protein for beta-galactosidase (Ppgb), mRNA [NM_001011959]	NM_001011959	FALSE
A_44_P194768	0.010691	0.000393659	0.419669	0.359991	0.193251	-0.00541198	-1.18453	ENSRNOT00000043921	Coq10a_predicted	PREDICTED: Rattus norvegicus coenzyme Q10 homolog A (yeast) (predicted) (Coq10a_predicted), mRNA [XM_343138]		FALSE
A_44_P528072	0.0417916	0.00510011	-0.835044	-0.237175	0.158571	0.272334	0.329644	CB546969	CB546969	CB546969 AMGNNUC:NRWA3-00061-C4-A white adipose tiss (10469) Rattus norvegicus cDNA clone nrwa3-00061-c4 5', mRNA sequence [CB546969]	CB546969	FALSE
A_44_P406957	0.0218993	0.00161273	-0.464658	-0.755017	-0.257683	-0.0300471	0.600816	AW914303	AW914303	AW914303 EST345607 Normalized rat brain, Bento Soares Rattus sp. cDNA clone RGIAD23 5' end, mRNA sequence [AW914303]	AW914303	FALSE
A_44_P222702	0.00895094	0.000267492	-0.193698	0.0194955	0.291817	0.762264	1.68744	ENSRNOT00000049064	ENSRNOT00000049064	similar to THUMP domain containing 3 (LOC302647), mRNA [Source:RefSeq_dna;Acc:XR_005711] [ENSRNOT00000049064]		FALSE
A_44_P231444	0.0228431	0.00174319	0.33853	-0.0933221	-0.472868	-0.58956	-1.1213	NM_001013042	Slc39a11	Rattus norvegicus solute carrier family 39 (metal ion transporter), member 11 (Slc39a11), mRNA [NM_001013042]	NM_001013042	FALSE
A_43_P13419	0.00611631	0.000119399	-0.023697	-0.17454	0.271737	0.725943	1.448	NM_172045	Ppp1r14b	Rattus norvegicus protein phosphatase 1, regulatory (inhibitor) subunit 14B (Ppp1r14b), mRNA [NM_172045]	NM_172045	FALSE
A_44_P174992	0.0370559	0.00409931	-0.731739	0.261051	0.132548	-0.344388	-1.44189	NM_172019	Ifi47	Rattus norvegicus interferon gamma inducible protein (Ifi47), mRNA [NM_172019]	NM_172019	FALSE
A_42_P704824	0.0132581	0.000629686	-0.403227	0.170165	0.22987	0.454136	1.65642	NM_001009640	Cirh1a	Rattus norvegicus cirrhosis, autosomal recessive 1A (human) (Cirh1a), mRNA [NM_001009640]	NM_001009640	FALSE
A_44_P389438	0.0180568	0.00116017	0.228955	0.739417	0.970346	1.14035	1.27117	XM_001055091	LOC679890	PREDICTED: Rattus norvegicus similar to G patch domain and KOW motifs, transcript variant 3 (LOC679890), mRNA [XM_001055091]	XM_001055091	FALSE
A_44_P182431	0.0202569	0.00141383	0.0401709	-0.214422	-0.363916	-0.947285	-2.59979	NM_017070	Srd5a1	Rattus norvegicus steroid 5 alpha-reductase 1 (Srd5a1), mRNA [NM_017070]	NM_017070	FALSE
A_44_P1046566	0.00978094	0.000326223	-0.136055	-0.13955	0.450378	0.89863	1.75992	ENSRNOT00000004150	RGD1564623_predicted	Rattus norvegicus cDNA clone IMAGE:7193285 [BC087109]		FALSE
A_44_P249704	0.0266355	0.00230432	-0.364238	0.19493	0.886802	1.30452	0.775264	NM_207611	Bhlhb9	Rattus norvegicus basic helix-loop-helix domain containing, class B, 9 (Bhlhb9), mRNA [NM_207611]	NM_207611	FALSE
A_44_P491924	0.023733	0.00188704	-0.217025	0.0898491	0.387607	0.564696	0.743893	NM_138878	Nedd8	Rattus norvegicus neural precursor cell expressed, developmentally down-regulated gene 8 (Nedd8), mRNA [NM_138878]	NM_138878	FALSE
A_44_P810179	0.0275173	0.00244497	0.117777	0.360775	0.530793	0.706051	0.719238	NM_001037193	LOC307798	Rattus norvegicus similar to 24432 protein (LOC307798), mRNA [NM_001037193]	NM_001037193	FALSE
A_44_P1008329	0.0124708	0.000547042	0.110612	0.216601	0.391372	0.814646	1.41414	NM_201421	Fgfr1op2	Rattus norvegicus FGFR1 oncogene partner 2 (Fgfr1op2), mRNA [NM_201421]	NM_201421	FALSE
A_44_P161525	0.0151931	0.000812397	0.0643641	0.504003	0.849822	1.0289	1.12578	NM_001017446	RGD1310199	Rattus norvegicus similar to RIKEN cDNA D030070L09 (RGD1310199), mRNA [NM_001017446]	NM_001017446	FALSE
A_44_P267228	0.0359385	0.00387788	0.102851	0.204101	0.324675	0.059515	-0.453499	NM_001009684	Hsd17b13	Rattus norvegicus hydroxysteroid (17-beta) dehydrogenase 13 (Hsd17b13), mRNA [NM_001009684]	NM_001009684	FALSE
A_42_P836392	0.0281621	0.00254798	0.276314	0.511319	0.400874	0.0570555	-2.81971	NM_134383	Elovl6	Rattus norvegicus ELOVL family member 6, elongation of long chain fatty acids (yeast) (Elovl6), mRNA [NM_134383]	NM_134383	FALSE
A_44_P472170	0.0327141	0.00335887	-0.250553	0.0974365	0.619998	0.954141	1.03582	NM_001007652	Pole3	Rattus norvegicus polymerase (DNA directed), epsilon 3 (p17 subunit) (Pole3), mRNA [NM_001007652]	NM_001007652	FALSE
A_43_P23029	0.00360925	3.56322e-05	0.107214	0.0464339	-0.533229	-1.03355	-2.94511	NM_001013139	Fars2	Rattus norvegicus phenylalanine-tRNA synthetase 2 (mitochondrial) (Fars2), mRNA [NM_001013139]	NM_001013139	FALSE
A_44_P716112	0.0320335	0.00323035	0.13441	0.0973688	0.346179	0.419228	1.28867	TC632623	TC632623			FALSE
A_44_P224832	0.0167853	0.000989796	-0.414054	0.0538029	0.346394	0.532226	0.613652	NM_001008371	RGD1309216	Rattus norvegicus similar to hypothetical protein FLJ20487 (RGD1309216), mRNA [NM_001008371]	NM_001008371	FALSE
A_44_P1052607	0.0354561	0.00378988	0.756928	0.98969	0.837534	0.693763	-0.143135	NM_019363	Aox1	Rattus norvegicus aldehyde oxidase 1 (Aox1), mRNA [NM_019363]	NM_019363	FALSE
A_44_P699625	0.0241822	0.00194942	0.139123	0.509194	0.874086	1.1116	1.82941	TC586730	TC586730			FALSE
A_44_P447368	0.0452616	0.00588079	-0.153395	0.250092	0.744752	0.872131	0.916086	NM_130734	Gnb2l1	Rattus norvegicus guanine nucleotide binding protein (G protein), beta polypeptide 2 like 1 (Gnb2l1), mRNA [NM_130734]	NM_130734	FALSE
A_44_P262791	0.0210087	0.00150231	0.311694	-0.186604	-0.129034	0.443955	1.61833	ENSRNOT00000055129	ENSRNOT00000055129	Ddx27 protein (Fragment). [Source:Uniprot/SPTREMBL;Acc:Q5I0G6] [ENSRNOT00000055129]		FALSE
A_44_P507571	0.0239565	0.00191892	-0.457108	0.0508526	0.637242	0.674047	1.69454	ENSRNOT00000020014	Ccne1	G1/S-specific cyclin-E1. [Source:Uniprot/SWISSPROT;Acc:P39949] [ENSRNOT00000020014]		FALSE
A_44_P555261	0.0306875	0.00295703	-0.347781	0.191335	-0.0262475	-0.461329	-1.60111	NM_031057	Aldh6a1	Rattus norvegicus aldehyde dehydrogenase family 6, subfamily A1 (Aldh6a1), mRNA [NM_031057]	NM_031057	FALSE
A_44_P356014	0.0251712	0.00207263	-0.559786	-0.135523	0.0135637	0.064629	0.580074	NM_001004262	Cog6	Rattus norvegicus component of oligomeric golgi complex 6 (Cog6), mRNA [NM_001004262]	NM_001004262	FALSE
A_44_P257628	0.0174378	0.0010803	0.11776	0.549283	1.00345	1.08664	1.12885	NM_173117	Aip1	Rattus norvegicus AIP1 (Aip1), mRNA [NM_173117]	NM_173117	FALSE
A_44_P789421	0.0432677	0.00542837	-0.297287	0.244982	0.499403	0.52843	0.555727	AW921557	AW921557	EST352861 Rat gene index, normalized rat, norvegicus, Bento Soares Rattus norvegicus cDNA clone RGIIA75 5' end, mRNA sequence [AW921557]	AW921557	FALSE
A_44_P429354	0.040294	0.00475856	-0.161507	0.129928	0.539389	0.656439	1.02538	XM_001054228	LOC300481	PREDICTED: Rattus norvegicus similar to 40S ribosomal protein S19 (LOC300481), mRNA [XM_001054228]	XM_001054228	FALSE
A_44_P375995	0.00930229	0.000295862	0.629215	2.06945	1.84102	1.30912	-0.533694	BI282744	BI282744	BI282744 UI-R-CW0s-cce-f-10-0-UI.s1 UI-R-CW0s Rattus norvegicus cDNA clone UI-R-CW0s-cce-f-10-0-UI 3', mRNA sequence [BI282744]	BI282744	FALSE
A_44_P494894	0.0118317	0.000493751	0.0432377	0.540806	0.599231	0.797895	1.3162	NM_001005529	Ttc1	Rattus norvegicus tetratricopeptide repeat domain 1 (Ttc1), mRNA [NM_001005529]	NM_001005529	FALSE
A_43_P18374	0.0113898	0.000453353	-0.211628	-0.744932	-0.0682581	0.5016	1.631	ENSRNOT00000014125	Plek2_predicted	PREDICTED: Rattus norvegicus pleckstrin 2 (predicted) (Plek2_predicted), mRNA [XM_234329]		FALSE
A_43_P10488	0.0171155	0.0010404	0.127887	-0.330675	0.153221	0.316722	0.771926	ENSRNOT00000022706	R3hcc1_predicted	PREDICTED: Rattus norvegicus R3H domain and coiled-coil containing 1 (predicted) (R3hcc1_predicted), mRNA [XM_341347]		FALSE
A_43_P12924	0.00530977	8.68129e-05	1.10506	0.968796	-0.0671928	-0.172046	-1.4694	NM_053754	Abcg5	Rattus norvegicus ATP-binding cassette, sub-family G (WHITE), member 5 (Abcg5), mRNA [NM_053754]	NM_053754	FALSE
A_44_P116999	0.0141271	0.000703379	0.0361069	-0.173632	0.125293	0.352694	0.938047	ENSRNOT00000030265	ENSRNOT00000030265	similar to Cell division cycle 34 homolog (predicted) (RGD1565047_predicted), mRNA [Source:RefSeq_dna;Acc:XR_009189] [ENSRNOT00000030265]		FALSE
A_44_P173478	0.0313286	0.00311631	-0.157622	0.0126413	0.076689	0.255714	1.22798	XM_343002	Cebpz_predicted	Rattus norvegicus similar to putative CCAAT binding factor 1; alternatively spliced transcript mCBF1 (LOC362686), mRNA [XM_343002]	XM_343002	FALSE
A_44_P436442	0.0209851	0.00149501	0.0699066	-0.00575954	0.0554673	0.295319	1.26428	XM_216766	Cpsf2_predicted	PREDICTED: Rattus norvegicus cleavage and polyadenylation specific factor 2 (predicted) (Cpsf2_predicted), mRNA [XM_216766]	XM_216766	FALSE
A_42_P459431	0.019053	0.00128111	0.315938	0.514884	0.676629	0.0534687	-0.667693	NM_001037206	Bphl	Rattus norvegicus biphenyl hydrolase-like (serine hydrolase, breast epithelial mucin-associated antigen) (Bphl), mRNA [NM_001037206]	NM_001037206	FALSE
A_44_P235978	0.040421	0.00482646	0.0837007	0.484432	0.242842	-0.471029	-2.09252	NM_017332	Fasn	Rattus norvegicus fatty acid synthase (Fasn), mRNA [NM_017332]	NM_017332	FALSE
A_44_P532435	0.0163386	0.000946888	-0.0836539	-0.42187	-0.710595	-1.41922	-2.97066	ENSRNOT00000060296	ENSRNOT00000060296	similar to peptidoglycan recognition protein 2 (LOC691298), mRNA [Source:RefSeq_dna;Acc:XR_007056] [ENSRNOT00000060296]		FALSE
A_44_P342730	0.0285623	0.0026125	-0.584195	-0.171305	-0.0117308	0.131493	0.767011	NM_001012275	Arih2_predicted	Rattus norvegicus ariadne homolog 2 (Drosophila) (predicted) (Arih2_predicted), mRNA [NM_001012275]	NM_001012275	FALSE
A_44_P838657	0.0268259	0.0023404	0.312668	0.00618333	0.115766	0.333879	0.831723	TC596957	TC596957	Q4ENY4_LISMO (Q4ENY4) Cobalt ABC transporter, ATP-binding protein, partial (5%) [TC596957]		FALSE
A_44_P266963	0.019037	0.00127394	0.0392044	0.0509146	-0.401626	-0.327264	-1.99984	ENSRNOT00000025534	C5	Complement C5 [Contains: C5a anaphylatoxin] (Fragment). [Source:Uniprot/SWISSPROT;Acc:P08650] [ENSRNOT00000025534]		FALSE
A_44_P482512	0.0184163	0.00119506	-0.238535	-0.229124	-0.321371	-0.51271	-1.16343	XM_343513	Aplp2	PREDICTED: Rattus norvegicus amyloid beta (A4) precursor-like protein 2 (Aplp2), mRNA [XM_343513]	XM_343513	FALSE
A_44_P538691	0.0128478	0.000589713	-0.36101	-0.280704	-0.0846508	0.243654	1.12517	NM_031772	Rpo1-4	Rattus norvegicus RNA polymerase 1-4 (Rpo1-4), mRNA [NM_031772]	NM_031772	FALSE
A_44_P530813	0.0275173	0.00244259	-0.461547	-0.428613	0.0231534	0.275354	0.962955	NM_012922	Casp3	Rattus norvegicus caspase 3, apoptosis related cysteine protease (Casp3), mRNA [NM_012922]	NM_012922	FALSE
A_44_P393343	0.042807	0.0053386	0.267378	0.52238	0.836057	0.839193	0.0988779	NM_207602	St3gal6	Rattus norvegicus ST3 beta-galactoside alpha-2,3-sialyltransferase 6 (St3gal6), mRNA [NM_207602]	NM_207602	FALSE
A_42_P731541	0.0432263	0.00541153	0.0342607	0.0222185	0.395063	0.562075	0.775218	ENSRNOT00000018005	Psmb5	Proteasome subunit beta type 5 precursor (EC 3.4.25.1) (Proteasome epsilon chain) (Macropain epsilon chain) (Multicatalytic endopeptidase complex epsilon chain) (Proteasome subunit X) (Proteasome chain 6). [Source:Uniprot/SWISSPROT;Acc:P28075]...		FALSE
A_43_P20271	0.0480933	0.00653165	-0.226093	-0.85824	0.00657314	-0.44985	-0.307465	ENSRNOT00000028816	LOC680751	Rattus norvegicus similar to Olf-1/EBF-like-4/23 transcription factor (LOC362215), mRNA [XM_342519]		FALSE
A_44_P187724	0.0254756	0.00210722	-0.346906	-0.385198	-0.267113	-1.21732	-1.49315	ENSRNOT00000038312	ENSRNOT00000038312	PREDICTED: Rattus norvegicus similar to Toll-interleukin 1 receptor domain-containing adaptor protein (LOC680127), mRNA [XM_001055833]		FALSE
A_44_P348781	0.0277085	0.00247231	0.509887	0.666202	0.34039	0.22893	-0.435956	NM_012696	Kng1	Rattus norvegicus kininogen 1 (Kng1), mRNA [NM_012696]	NM_012696	FALSE
A_43_P18947	0.0413575	0.00500775	-0.30399	0.214433	0.205195	0.458808	0.876962	NM_001024754	Gmps	Rattus norvegicus guanine monphosphate synthetase (Gmps), mRNA [NM_001024754]	NM_001024754	FALSE
A_44_P851664	0.0089295	0.000266374	0.201629	0.0701493	0.230854	0.451456	0.964373	AA801123	AA801123	AA801123 EST190620 Normalized rat ovary, Bento Soares Rattus sp. cDNA clone ROVAA70 5' end, mRNA sequence [AA801123]	AA801123	FALSE
A_42_P759192	0.0376699	0.00422754	0.0836068	0.355283	0.424538	0.70175	1.17747	NM_001017494	LOC498266	Rattus norvegicus similar to Golgin 45 (Basic leucine zipper nuclear factor 1) (LOC498266), mRNA [NM_001017494]	NM_001017494	FALSE
A_44_P320818	0.00477088	5.83025e-05	-0.510015	-0.025226	-0.206837	-0.878573	-2.14945	NM_023103	Mug1	Rattus norvegicus Murinoglobulin 1 homolog (mouse) (Mug1), mRNA [NM_023103]	NM_023103	FALSE
A_44_P838339	0.0107501	0.000398131	0.381276	0.772792	1.17385	1.45129	1.73149	TC588871	TC588871	BC024474 Ipo8 protein {Mus musculus} (exp=-1; wgp=0; cg=0), partial (75%) [TC588871]		FALSE
A_44_P178503	0.040741	0.00489179	0.476248	0.736963	1.06644	1.25908	1.05767	ENSRNOT00000002702	ENSRNOT00000002702	PREDICTED: Rattus norvegicus similar to KIAA1407 (predicted) (RGD1566314_predicted), mRNA [XM_221452]		FALSE
A_44_P336429	0.010261	0.000362421	0.236105	0.286485	0.614546	0.859594	1.18674	NM_053707	Hdgf	Rattus norvegicus hepatoma-derived growth factor (Hdgf), mRNA [NM_053707]	NM_053707	FALSE
A_44_P313283	0.027512	0.00243955	0.0638999	0.115435	0.288884	0.688038	1.1989	NM_017116	Capn2	Rattus norvegicus calpain 2 (Capn2), mRNA [NM_017116]	NM_017116	FALSE
A_43_P12602	0.0106972	0.000394461	0.4669	0.835836	0.813017	0.580847	-0.532554	NM_031589	Slc37a4	Rattus norvegicus solute carrier family 37 (glycerol-6-phosphate transporter), member 4 (Slc37a4), mRNA [NM_031589]	NM_031589	FALSE
A_44_P668704	0.0155978	0.00084652	0.164533	0.636914	0.692479	0.753105	1.26374	TC585807	TC585807			FALSE
A_42_P678974	0.0216772	0.00158944	-0.202808	0.0937359	0.566177	0.626724	0.663441	ENSRNOT00000003344	ENSRNOT00000003344	PREDICTED: Rattus norvegicus similar to COX11 homolog, cytochrome c oxidase assembly protein (LOC690300), mRNA [XM_001074020]		FALSE
A_44_P681613	0.00772366	0.000189822	-0.375235	-0.214611	0.287603	0.487388	1.80188	BF287586	BF287586	BF287586 EST452177 Rat Gene Index, normalized rat, Rattus norvegicus cDNA Rattus norvegicus cDNA clone RGIGH95 5' sequence, mRNA sequence [BF287586]	BF287586	FALSE
A_44_P333057	0.026071	0.00222047	-0.384092	-0.208751	0.0641889	0.174549	0.534628	NM_001039003	Mtrr	Rattus norvegicus 5-methyltetrahydrofolate-homocysteine methyltransferase reductase (Mtrr), mRNA [NM_001039003]	NM_001039003	FALSE
A_42_P480108	0.00611631	0.000120101	-0.0682424	-0.0291435	0.619256	0.911412	1.15657	NM_001007637	mrpl24	Rattus norvegicus mitochondrial ribosomal protein L24 (mrpl24), mRNA [NM_001007637]	NM_001007637	FALSE
A_42_P537501	0.00284077	1.73982e-05	0.604437	0.934433	0.744828	0.525692	-0.457443	NM_012789	Dpp4	Rattus norvegicus dipeptidylpeptidase 4 (Dpp4), mRNA [NM_012789]	NM_012789	FALSE
A_44_P776098	0.0388069	0.00446938	1.04094	0.642306	0.154677	0.508182	-0.270919	TC616052	TC616052	Q7TQ12_RAT (Q7TQ12) Aa1114, partial (12%) [TC616052]		FALSE
A_44_P1013822	0.00790266	0.000205225	-0.494865	0.123103	0.349636	0.965033	1.43171	NM_001013960	LOC302640	Rattus norvegicus similar to acyl-CoA thioesterase (LOC302640), mRNA [NM_001013960]	NM_001013960	FALSE
A_44_P288108	0.041828	0.00512071	-0.25177	-0.526419	-0.114955	0.250823	0.906454	ENSRNOT00000001049	Abcf1	ATP-binding cassette sub-family F member 1 (ATP-binding cassette 50). [Source:Uniprot/SWISSPROT;Acc:Q6MG08] [ENSRNOT00000001049]		FALSE
A_44_P308530	0.0238798	0.00190641	0.160055	-0.0527638	0.134607	0.336567	1.34944	CO561288	CO561288	AGENCOURT_28540555 NIH_MGC_249 Rattus norvegicus cDNA clone IMAGE:7376455 5', mRNA sequence [CO561288]	CO561288	FALSE
A_42_P601606	0.0268259	0.00234304	0.438537	0.189151	-0.0323203	-0.287047	-0.65002	NM_019369	Itih4	Rattus norvegicus inter alpha-trypsin inhibitor, heavy chain 4 (Itih4), mRNA [NM_019369]	NM_019369	FALSE
A_44_P517896	0.0185935	0.0012145	-0.141003	0.346742	0.196916	0.102041	-1.2341	NM_032066	Hsd17b12	Rattus norvegicus hydroxysteroid (17-beta) dehydrogenase 12 (Hsd17b12), mRNA [NM_032066]	NM_032066	FALSE
A_44_P309650	0.016935	0.00101312	0.155702	0.161881	0.326689	0.613699	1.85177	NM_001012747	RGD1305327	Rattus norvegicus similar to hypothetical protein MGC3731 (RGD1305327), mRNA [NM_001012747]	NM_001012747	FALSE
A_44_P468107	0.0117379	0.000480441	0.426819	0.614704	0.563684	-0.127974	-1.90012	NM_134326	Alb	Rattus norvegicus albumin (Alb), mRNA [NM_134326]	NM_134326	FALSE
A_44_P850422	0.0136389	0.000665242	-0.0766017	-0.0367743	-0.126427	-0.423449	-1.15392	NM_031086	Pros1	Rattus norvegicus protein S (alpha) (Pros1), mRNA [NM_031086]	NM_031086	FALSE
A_44_P775982	0.00976589	0.0003252	0.201467	0.00349939	-0.291136	-0.685625	-1.6431	ENSRNOT00000050006	ENSRNOT00000050006	Rattus norvegicus cDNA clone MGC:156700 IMAGE:7099560, complete cds [BC128749]		FALSE
A_44_P130894	0.0401317	0.00472655	0.224557	0.759285	0.806312	1.06438	1.61235	XM_212948	XM_212948	Rattus norvegicus similar to Methionine aminopeptidase 2 (MetAP 2) (Peptidase M 2) (Initiation factor 2 associated 67 kDa glycoprotein) (p67) (p67eIF2) (LOC295497), mRNA [XM_212948]	XM_212948	FALSE
A_42_P699162	0.0170045	0.00103085	0.11878	0.24739	0.489301	0.689756	1.27816	NM_147177	Ruvbl1	Rattus norvegicus RuvB-like protein 1 (Ruvbl1), mRNA [NM_147177]	NM_147177	FALSE
A_43_P11370	0.00160494	2.31247e-06	0.314092	0.224175	1.08595	1.72204	2.59258	NM_207601	Plp2	Rattus norvegicus proteolipid protein 2 (Plp2), mRNA [NM_207601]	NM_207601	FALSE
A_44_P237938	0.00340922	3.03826e-05	-0.168631	0.272034	0.773575	1.1416	1.53767	ENSRNOT00000016995	Vps36_predicted	Vacuolar protein sorting-associated protein 36 (ELL-associated protein of 45 kDa). [Source:Uniprot/SWISSPROT;Acc:P0C0A2] [ENSRNOT00000016995]		FALSE
A_44_P997826	0.0452589	0.00587276	0.404447	0.937069	0.977088	0.822799	0.240028	NM_031097	Rnpep	Rattus norvegicus arginyl aminopeptidase (aminopeptidase B) (Rnpep), mRNA [NM_031097]	NM_031097	FALSE
A_42_P629599	0.0456586	0.00598174	0.364403	1.04943	0.979667	1.34453	1.64887	NM_138864	Ccdc5	Rattus norvegicus coiled-coil domain containing 5 (Ccdc5), mRNA [NM_138864]	NM_138864	FALSE
A_42_P753262	0.00253917	1.19667e-05	0.225996	0.246844	0.680364	0.999468	1.44673	XM_214805	Zfp444_predicted	PREDICTED: Rattus norvegicus zinc finger protein 444 (predicted) (Zfp444_predicted), mRNA [XM_214805]	XM_214805	FALSE
A_43_P14162	0.023221	0.00180892	2.34588	1.34441	0.417505	-0.555438	-1.12011	NM_012488	A2m	Rattus norvegicus alpha-2-macroglobulin (A2m), mRNA [NM_012488]	NM_012488	FALSE
A_44_P290582	0.0418239	0.00511332	-0.214081	-0.0112289	0.14946	0.388041	1.31901	NM_001014129	Noc4l	Rattus norvegicus nucleolar complex associated 4 homolog (S. cerevisiae) (Noc4l), mRNA [NM_001014129]	NM_001014129	FALSE
A_44_P299086	0.0403276	0.00476518	-0.069613	0.311148	0.404688	0.707484	1.30551	AI112947	AI112947	AI112947 UI-R-A1-et-c-01-0-UI.s1 UI-R-A1 Rattus norvegicus cDNA clone UI-R-A1-et-c-01-0-UI 3', mRNA sequence [AI112947]	AI112947	FALSE
A_44_P325744	0.0323205	0.00329816	-0.0221422	-0.194875	0.411758	0.806845	1.43092	NM_053561	Nap1l1	Rattus norvegicus nucleosome assembly protein 1-like 1 (Nap1l1), mRNA [NM_053561]	NM_053561	FALSE
A_44_P1050433	0.0153595	0.000827982	0.023126	-0.0760489	0.392044	0.573563	0.816545	XM_001078552	LOC691501	PREDICTED: Rattus norvegicus similar to small nuclear RNA activating complex, polypeptide 5 (LOC691501), mRNA [XM_001078552]	XM_001078552	FALSE
A_44_P1011780	0.019767	0.00135362	-0.0596921	1.57801	0.982704	2.02083	2.58612	ENSRNOT00000013076	Pla2g12a_predicted	PREDICTED: Rattus norvegicus phospholipase A2, group XIIA (predicted) (Pla2g12a_predicted), mRNA [XM_342340]		FALSE
A_44_P1037285	0.0143879	0.00072788	0.227041	0.254476	0.498652	1.14636	1.34476	NM_212541	Slc44a4	Rattus norvegicus solute carrier family 44, member 4 (Slc44a4), mRNA [NM_212541]	NM_212541	FALSE
A_44_P817696	0.0380437	0.00429385	0.175311	0.749611	0.918821	0.755674	0.0687034	NM_001007734	Echdc1	Rattus norvegicus enoyl Coenzyme A hydratase domain containing 1 (Echdc1), mRNA [NM_001007734]	NM_001007734	FALSE
A_44_P288153	0.00432175	4.79708e-05	-0.468937	-0.486193	0.213033	0.718278	1.81686	NM_019170	Cbr1	Rattus norvegicus carbonyl reductase 1 (Cbr1), mRNA [NM_019170]	NM_019170	FALSE
A_44_P144943	0.0241822	0.00194739	-0.123977	0.252466	0.18565	0.41958	1.07265	NM_001047847	RGD1306947	Rattus norvegicus similar to RIKEN cDNA 1500041N16 (RGD1306947), mRNA [NM_001047847]	NM_001047847	FALSE
A_42_P816402	0.00485073	6.54051e-05	-0.556384	-0.13157	0.474315	0.678325	1.23978	NM_001011976	Wdr31	Rattus norvegicus WD repeat domain 31 (Wdr31), mRNA [NM_001011976]	NM_001011976	FALSE
A_44_P681227	0.00222533	5.27629e-06	0.114666	0.160998	0.708585	0.999319	1.53022	AW143725	AW143725	AW143725 EST294021 Normalized rat embryo, Bento Soares Rattus sp. cDNA clone RGIBY81 5' end, mRNA sequence [AW143725]	AW143725	FALSE
A_44_P432109	0.00485073	6.68788e-05	-0.727331	-0.223811	0.359317	0.853853	1.46726	NM_032614	Txnl2	Rattus norvegicus thioredoxin-like 2 (Txnl2), mRNA [NM_032614]	NM_032614	FALSE
A_44_P358151	0.023221	0.00181416	0.191402	-0.505157	-0.468569	-0.899478	-1.99549	NM_199082	Sectm1b	Rattus norvegicus secreted and transmembrane 1B (Sectm1b), mRNA [NM_199082]	NM_199082	FALSE
A_44_P346931	0.0373083	0.00415111	-0.563822	-0.278202	0.20262	0.536688	0.553212	ENSRNOT00000056791	ENSRNOT00000056791	Pnpt1 protein (Fragment). [Source:Uniprot/SPTREMBL;Acc:Q562B9] [ENSRNOT00000056791]		FALSE
A_44_P267993	0.036651	0.00400366	-0.45744	0.176838	0.680709	0.818863	1.21063	CB546126	CB546126	CB546126 AMGNNUC:NRDG1-00165-F3-A nrdg1 (10855) Rattus norvegicus cDNA clone nrdg1-00165-f3 5', mRNA sequence [CB546126]	CB546126	FALSE
A_42_P753820	0.0250674	0.00206008	0.241459	0.669334	1.15433	1.36338	1.31513	NM_001013184	Hmgn1	Rattus norvegicus high mobility group nucleosomal binding domain 1 (Hmgn1), mRNA [NM_001013184]	NM_001013184	FALSE
A_44_P729514	0.0485359	0.00661253	-0.27526	-0.544956	-0.0923683	0.0746725	0.827609	XM_573199	RGD1560049_predicted	PREDICTED: Rattus norvegicus similar to Dual specificity protein phosphatase 3 (T-DSP11) (predicted) (RGD1560049_predicted), mRNA [XM_573199]	XM_573199	FALSE
A_43_P19059	0.0377146	0.00423657	-0.295155	0.0217742	0.233099	0.373709	1.49886	ENSRNOT00000019056	RGD1560656_predicted	PREDICTED: Rattus norvegicus similar to nucleolar complex associated 3 homolog (LOC685468), mRNA [XR_006195]		FALSE
AT_ssR_PC_3	0.0275716	0.00245274	0.259581	0.547368	0.287324	-0.110868	-1.4451	AT_ssR_PC_3	AT_ssR_PC_3			pos
A_44_P168184	0.0049178	7.1912e-05	-0.381279	0.328944	1.03177	1.1988	1.5233	AF507943	Rasl2-9	Rattus norvegicus GTP-ase Ran mRNA, complete cds. [AF507943]	AF507943	FALSE
A_44_P206466	0.0371076	0.00411492	0.521073	0.169754	0.4385	0.656707	1.14698	ENSRNOT00000057019	Senp6_predicted	PREDICTED: Rattus norvegicus SUMO [XM_217209]		FALSE
A_44_P243760	0.0211984	0.00152718	-0.324585	0.113046	0.39137	0.729022	1.9625	ENSRNOT00000008286	RGD1560842_predicted	PREDICTED: Rattus norvegicus similar to Brix domain containing 1 (predicted) (RGD1560842_predicted), mRNA [XM_234659]		FALSE
A_44_P885959	0.00355932	3.39996e-05	-0.472593	-0.167984	0.0558359	0.630961	1.22216	TC621051	TC621051			FALSE
A_44_P225566	0.0124563	0.000541503	0.264878	0.0835455	0.115467	-0.323748	-1.35412	NM_022184	Cask	Rattus norvegicus calcium/calmodulin-dependent serine protein kinase (MAGUK family) (Cask), mRNA [NM_022184]	NM_022184	FALSE
A_42_P820829	0.0496359	0.00685107	-0.0298142	-0.0462263	-0.0563443	-0.704203	-1.94752	NM_001014090	RGD1305890	Rattus norvegicus similar to RIKEN cDNA D130038B21 (RGD1305890), mRNA [NM_001014090]	NM_001014090	FALSE
A_44_P671449	0.0126228	0.000564485	-0.138782	0.237518	0.479899	0.922306	0.971292	TC602060	TC602060	RM35_MOUSE (Q9CQL6) 39S ribosomal protein L35, mitochondrial precursor (L35mt) (MRP-L35), partial (32%) [TC602060]		FALSE
A_44_P285530	0.0392439	0.00454449	-0.438617	0.200144	0.506859	0.658791	0.972664	NM_199380	Eif2s2	Rattus norvegicus eukaryotic translation initiation factor 2, subunit 2 (beta) (Eif2s2), mRNA [NM_199380]	NM_199380	FALSE
A_44_P216497	0.00652496	0.000138501	0.176852	0.0044679	0.515593	0.956086	1.46476	XM_001073036	LOC686240	PREDICTED: Rattus norvegicus similar to NMDA receptor regulated 1-like, transcript variant 1 (LOC686240), mRNA [XM_001073036]	XM_001073036	FALSE
A_44_P116449	0.0188789	0.00124926	0.0672902	0.0247334	0.393872	0.713067	1.03452	NM_031093	Rala	Rattus norvegicus v-ral simian leukemia viral oncogene homolog A (ras related) (Rala), mRNA [NM_031093]	NM_031093	FALSE
A_44_P387523	0.0320704	0.00324762	-0.00184202	0.208642	0.538563	0.634864	0.791832	NM_031109	Rps10	Rattus norvegicus ribosomal protein S10 (Rps10), mRNA [NM_031109]	NM_031109	FALSE
A_44_P200728	0.00222533	4.2733e-06	-0.313362	-0.116787	0.332625	0.480236	0.678593	AW919056	AW919056	AW919056 EST350360 Rat gene index, normalized rat, norvegicus, Bento Soares Rattus norvegicus cDNA clone RGIFC24 5' end, mRNA sequence [AW919056]	AW919056	FALSE
A_44_P1028282	0.0353131	0.00374633	0.00681448	0.032564	0.362708	0.596908	0.699654	ENSRNOT00000025970	Mrpl51_predicted	PREDICTED: Rattus norvegicus mitochondrial ribosomal protein L51 (predicted) (Mrpl51_predicted), mRNA [XM_216269]		FALSE
A_44_P368703	0.0130897	0.000615595	-0.00118673	0.25676	0.580912	0.942868	1.06573	BF283115	BF283115	BF283115 EST447706 Rat Gene Index, normalized rat, Rattus norvegicus cDNA Rattus norvegicus cDNA clone RGIDX71 3' sequence, mRNA sequence [BF283115]	BF283115	FALSE
A_44_P698581	0.0229148	0.00175632	0.0347824	0.0559881	0.518601	0.691328	0.879913	A_44_P698581	A_44_P698581			FALSE
A_44_P1001735	0.00284077	1.76548e-05	-0.375483	0.0635248	0.584796	0.869543	1.36615	NM_001009621	Nudcd2	Rattus norvegicus NudC domain containing 2 (Nudcd2), mRNA [NM_001009621]	NM_001009621	FALSE
A_42_P788760	0.0163285	0.000934972	-0.252306	-0.16145	0.0291499	0.149771	0.621556	ENSRNOT00000011378	Wdr21_predicted	PREDICTED: Rattus norvegicus WD repeat domain 21 (predicted) (Wdr21_predicted), mRNA [XM_343088]		FALSE
A_44_P105229	0.018732	0.00122854	-0.0370723	-0.0385421	-0.148623	-0.572819	-1.75276	NM_001013157	Nnt	Rattus norvegicus nicotinamide nucleotide transhydrogenase (Nnt), mRNA [NM_001013157]	NM_001013157	FALSE
A_44_P913530	0.0486908	0.00664143	-0.257882	-0.0772856	0.0514871	0.409455	0.592342	A_44_P913530	A_44_P913530			FALSE
A_44_P146123	0.017681	0.00111779	0.06959	0.192295	0.455694	0.637728	1.22452	AA892855	AA892855	AA892855 EST196658 Normalized rat kidney, Bento Soares Rattus sp. cDNA clone RKIAY14 3' end, mRNA sequence [AA892855]	AA892855	FALSE
A_43_P12618	0.0459799	0.00605338	0.238261	0.49715	0.817403	0.963623	0.995606	NM_031627	Nr1h3	Rattus norvegicus nuclear receptor subfamily 1, group H, member 3 (Nr1h3), mRNA [NM_031627]	NM_031627	FALSE
A_44_P307172	0.040741	0.00489062	-0.436907	0.0549997	0.521801	0.769163	1.07712	NM_199372	Eif4a1	Rattus norvegicus eukaryotic translation initiation factor 4A1 (Eif4a1), mRNA [NM_199372]	NM_199372	FALSE
A_44_P1044410	0.0262814	0.00225592	0.685614	-0.0665787	0.240778	0.805181	1.20529	ENSRNOT00000027668	Sf3b2_predicted	Rattus norvegicus similar to Splicing factor 3b, subunit 2 (LOC293671), mRNA [XM_215182]		FALSE
A_43_P13270	0.00703703	0.000155791	0.0818074	0.607246	1.02426	1.33727	1.77219	NM_134415	Cdk105	Rattus norvegicus CDK105 protein (Cdk105), mRNA [NM_134415]	NM_134415	FALSE
A_44_P114656	0.0034568	3.15843e-05	0.0840333	0.277961	0.706058	1.07633	1.16213	A_44_P114656	A_44_P114656			FALSE
A_44_P535899	0.041874	0.00513732	0.518344	-0.463285	-0.0239625	-0.0552938	-0.198772	ENSRNOT00000048767	ND5	NADH-ubiquinone oxidoreductase chain 5 (EC 1.6.5.3) (NADH dehydrogenase subunit 5). [Source:Uniprot/SWISSPROT;Acc:P11661] [ENSRNOT00000048767]		FALSE
A_44_P915790	0.010261	0.000363238	0.25972	0.469499	0.145983	-0.212657	-2.11955	TC622410	TC622410			FALSE
A_44_P1004868	0.00485073	6.75618e-05	-0.480843	0.0252381	0.40489	0.716951	0.900891	XM_216357	RGD1310681_predicted	PREDICTED: Rattus norvegicus similar to RIKEN cDNA 6720467C03 (predicted) (RGD1310681_predicted), mRNA [XM_216357]	XM_216357	FALSE
A_44_P623770	0.0210175	0.00150408	0.0093587	0.4023	0.703974	0.888066	1.09692	TC602701	TC602701			FALSE
A_44_P137334	0.0312421	0.00309603	-0.582716	-0.390614	-0.280407	0.0224539	0.952211	NM_181474	Tfb1m	Rattus norvegicus transcription factor B1, mitochondrial (Tfb1m), mRNA [NM_181474]	NM_181474	FALSE
A_44_P1050444	0.0147325	0.000764967	-0.356478	0.157802	0.482752	0.530311	0.7858	NM_001007749	Atp5s	Rattus norvegicus mitochondrial ATP synthase regulatory component factor B (Atp5s), mRNA [NM_001007749]	NM_001007749	FALSE
A_44_P313272	0.0238815	0.00190869	0.743942	0.274809	0.104123	-0.222185	-1.33717	NM_133623	Slc6a13	Rattus norvegicus solute carrier family 6 (neurotransmitter transporter, GABA), member 13 (Slc6a13), mRNA [NM_133623]	NM_133623	FALSE
A_44_P304759	0.036057	0.00389308	-0.167846	-0.176008	0.434809	0.64379	0.933377	XR_007322	RGD1563459_predicted	PREDICTED: Rattus norvegicus RGD1563459 (predicted) (RGD1563459_predicted), mRNA [XR_007322]	XR_007322	FALSE
A_44_P301621	0.0079837	0.000211817	-0.385362	-0.525274	-0.00388288	0.384472	1.31135	NM_172018	Pp3111	Rattus norvegicus PP3111 protein (Pp3111), mRNA [NM_172018]	NM_172018	FALSE
A_44_P347970	0.0225336	0.00168831	-0.145085	0.212079	0.311479	0.62406	0.909451	AW142620	AW142620	AW142620 EST292872 Normalized rat embryo, Bento Soares Rattus sp. cDNA clone RGIAQ91 5' end, mRNA sequence [AW142620]	AW142620	FALSE
A_44_P157045	0.00295932	2.13703e-05	0.0296638	0.125177	0.452203	0.547718	0.628585	ENSRNOT00000045196	RGD1560716_predicted	PREDICTED: Rattus norvegicus similar to ribosomal protein S12 (predicted) (RGD1560716_predicted), mRNA [XM_233424]		FALSE
A_44_P1039205	0.00633533	0.000128462	0.418553	0.391873	-0.287852	-0.831578	-1.90642	M23721	M23721	RATCPA208 Rat carboxypeptidase (CA2) gene, exon 11 [M23721]	M23721	FALSE
A_44_P225364	0.0268259	0.00234279	0.142251	0.0694542	0.515268	0.575045	0.744287	NM_022506	Rpl31	Rattus norvegicus ribosomal protein L31 (Rpl31), mRNA [NM_022506]	NM_022506	FALSE
A_44_P1037886	0.0311897	0.00307629	0.205682	0.297968	0.695264	0.901865	1.04129	NM_001033685	Sap18	Rattus norvegicus sin3-associated polypeptide, 18kDa (Sap18), mRNA [NM_001033685]	NM_001033685	FALSE
A_44_P191683	0.0284673	0.00259318	0.4173	-0.254257	-0.058341	0.184736	-0.107874	NM_001000549	Olr192_predicted	Rattus norvegicus olfactory receptor 192 (predicted) (Olr192_predicted), mRNA [NM_001000549]	NM_001000549	FALSE
A_44_P350843	0.0446138	0.00573772	-0.385038	0.278885	0.15358	-0.0524797	-0.600733	ENSRNOT00000050321	RGD1306508_predicted	PREDICTED: Rattus norvegicus similar to hypothetical protein CL25084 (predicted) (RGD1306508_predicted), mRNA [XM_214121]		FALSE
A_44_P929104	0.0341587	0.00355277	0.22719	0.424632	0.739201	1.04505	0.933691	ENSRNOT00000056305	RGD1560964_predicted	PREDICTED: Rattus norvegicus similar to XAP-5 protein (predicted) (RGD1560964_predicted), mRNA [XM_215220]		FALSE
A_42_P646075	0.0320704	0.00324846	-0.211225	0.809075	1.14017	1.53129	1.29441	NM_001004279	Ppid	Rattus norvegicus peptidylprolyl isomerase D (cyclophilin D) (Ppid), mRNA [NM_001004279]	NM_001004279	FALSE
A_44_P337311	0.00496083	7.41252e-05	0.763452	0.622699	0.316638	-0.862039	-2.34652	ENSRNOT00000017078	Thbs4	Thrombospondin-4 precursor. [Source:Uniprot/SWISSPROT;Acc:P49744] [ENSRNOT00000017078]		FALSE
A_44_P534557	0.0323205	0.00329949	-0.451026	-0.0306217	0.565717	1.0128	0.823014	ENSRNOT00000004260	RGD1561019_predicted	RVL9406 Wackym-Soares normalized rat vestibular cDNA library Rattus norvegicus cDNA 5', mRNA sequence [DV718777]		FALSE
A_44_P460797	0.00652496	0.000138584	0.112298	0.266937	0.576527	0.813666	1.23407	AF020046	Itgae	Rattus norvegicus integrin alpha E2 mRNA, partial cds [AF020046]	AF020046	FALSE
A_44_P100117	0.039178	0.00453268	-0.326431	-0.42839	-0.0738702	0.00126588	0.371873	NM_212549	Ring1	Rattus norvegicus ring finger protein 1 (Ring1), mRNA [NM_212549]	NM_212549	FALSE
A_44_P988511	0.00814469	0.000221669	-0.132716	-0.386796	-0.0694293	-0.00622845	0.94305	XM_342530	Csrp2bp_predicted	PREDICTED: Rattus norvegicus cysteine and glycine-rich protein 2 binding protein (predicted) (Csrp2bp_predicted), mRNA [XM_342530]	XM_342530	FALSE
A_44_P337351	0.00824456	0.000227345	0.755341	0.86206	0.837386	0.445675	-0.931427	NM_001033883	Cxcl12	Rattus norvegicus chemokine (C-X-C motif) ligand 12 (Cxcl12), transcript variant 3, mRNA [NM_001033883]	NM_001033883	FALSE
A_44_P175893	0.040421	0.00482436	0.0324562	0.464699	0.135329	-0.138301	-0.930661	XM_234277	RGD1305721_predicted	PREDICTED: Rattus norvegicus similar to RIKEN cDNA 2810055F11 (predicted) (RGD1305721_predicted), mRNA [XM_234277]	XM_234277	FALSE
A_42_P525962	0.00639543	0.000132236	-0.0705845	0.281103	0.730553	1.04011	1.19272	ENSRNOT00000005402	RGD1561792_predicted	PREDICTED: Rattus norvegicus similar to CG14903-PA (predicted) (RGD1561792_predicted), mRNA [XM_216648]		FALSE
A_44_P996233	0.00711598	0.000159871	-0.187953	-0.200992	0.58771	0.660334	1.05158	NM_001008768	Prim1	Rattus norvegicus DNA primase, p49 subunit (Prim1), mRNA [NM_001008768]	NM_001008768	FALSE
A_43_P19812	0.013484	0.000646765	0.169966	0.332322	0.511586	0.727019	1.36422	NM_001025652	RGD1305420	Rattus norvegicus similar to Nef associated protein 1 (RGD1305420), mRNA [NM_001025652]	NM_001025652	FALSE
A_43_P10825	0.0117967	0.000488426	0.0998988	0.194414	0.417694	0.567667	1.19567	A_43_P10825	A_43_P10825			FALSE
A_44_P133650	0.0126228	0.000564052	0.216925	-0.224164	-0.0138435	0.271293	0.787323	ENSRNOT00000008298	Trim37_predicted	Rattus norvegicus similar to mKIAA0898 protein (LOC360592), mRNA [XM_340872]		FALSE
A_42_P609263	0.0113898	0.000453429	0.256724	0.0734261	0.447842	0.563273	0.935191	NM_001025653	Lrrc42	Rattus norvegicus leucine rich repeat containing 42 (Lrrc42), mRNA [NM_001025653]	NM_001025653	FALSE
A_42_P668042	0.047543	0.00639352	0.191541	0.0252365	0.570649	0.850823	1.17258	NM_147138	Zwint	Rattus norvegicus ZW10 interactor (Zwint), mRNA [NM_147138]	NM_147138	FALSE
A_42_P558887	0.0295426	0.00276208	0.243406	-0.021981	-0.0436652	-0.205208	-0.917148	BF548410	BF548410	BF548410 UI-R-C0-hy-c-06-0-UI.r1 UI-R-C0 Rattus norvegicus cDNA clone UI-R-C0-hy-c-06-0-UI 5', mRNA sequence [BF548410]	BF548410	FALSE
A_44_P356492	0.0142626	0.000718497	-0.0494412	0.168507	0.379581	0.73672	1.21625	NM_001010963	LOC362154	Rattus norvegicus brain zinc finger protein (LOC362154), mRNA [NM_001010963]	NM_001010963	FALSE
A_44_P790393	0.0299605	0.00282993	-0.946203	-0.574327	0.0738102	0.441894	1.32521	CK603271	LOC681708	AGENCOURT_17895151 NIH_MGC_234 Rattus norvegicus cDNA clone IMAGE:7192830 5', mRNA sequence [CK603271]	CK603271	FALSE
A_44_P257510	0.00872622	0.000255982	0.0361229	-0.210943	-0.366188	-0.545096	-1.09938	ENSRNOT00000014672	Foxn1	PREDICTED: Rattus norvegicus forkhead box N1 (mapped) (Foxn1_mapped), mRNA [XM_220632]		FALSE
A_44_P360946	0.0111021	0.000425844	-0.162619	0.0541944	0.434998	0.485412	0.541517	XR_008195	RGD1562134_predicted	PREDICTED: Rattus norvegicus similar to 60S ribosomal protein L9 (predicted) (RGD1562134_predicted), mRNA [XR_008195]	XR_008195	FALSE
A_44_P142016	0.022366	0.00165904	-0.340913	-0.227555	0.0150827	0.161801	0.826569	NM_019163	Psen1	Rattus norvegicus presenilin 1 (Psen1), mRNA [NM_019163]	NM_019163	FALSE
A_44_P358921	0.0353769	0.00375876	-0.17946	0.256244	0.559217	0.84078	0.900744	NM_020075	Eif5	Rattus norvegicus eukaryotic translation initiation factor 5 (Eif5), mRNA [NM_020075]	NM_020075	FALSE
A_44_P827421	0.00239218	6.89352e-06	0.183356	-0.0427296	0.328283	0.837807	1.51025	XM_575939	RGD1560468_predicted	PREDICTED: Rattus norvegicus similar to novel protein (predicted) (RGD1560468_predicted), mRNA [XM_575939]	XM_575939	FALSE
A_44_P242614	0.00771869	0.000189064	0.130223	0.485703	0.544785	0.272099	-0.660994	XM_342692	Znrf1_predicted	PREDICTED: Rattus norvegicus zinc and ring finger 1 (predicted) (Znrf1_predicted), mRNA [XM_342692]	XM_342692	FALSE
A_44_P135843	0.0281621	0.00255156	-0.205157	-0.00711215	0.369223	0.43928	0.657172	NM_031109	Rps10	Rattus norvegicus ribosomal protein S10 (Rps10), mRNA [NM_031109]	NM_031109	FALSE
A_44_P181503	0.00905067	0.000276751	0.152856	0.294844	-0.0477047	-0.306241	-1.45001	ENSRNOT00000007552	Suclg2	Suclg2 protein (Fragment). [Source:Uniprot/SPTREMBL;Acc:Q68FT4] [ENSRNOT00000007552]		FALSE
A_44_P575533	0.0312663	0.00310314	0.214339	0.00696993	0.498977	0.60425	0.720499	NM_022506	Rpl31	Rattus norvegicus ribosomal protein L31 (Rpl31), mRNA [NM_022506]	NM_022506	FALSE
A_44_P714986	0.010121	0.000349988	-0.105693	0.154453	0.102188	-0.229529	-2.02097	CK478004	CK478004	AGENCOURT_17578690 NIH_MGC_232 Rattus norvegicus cDNA clone IMAGE:7125902 5', mRNA sequence [CK478004]	CK478004	FALSE
A_44_P929498	0.0171351	0.00104426	0.189793	0.337683	-0.00532812	0.161052	-0.164789	AW143774	AW143774	AW143774 EST294070 Normalized rat embryo, Bento Soares Rattus sp. cDNA clone RGIBZ85 5' end, mRNA sequence [AW143774]	AW143774	FALSE
A_44_P558163	0.0270794	0.00237571	-0.235396	0.328408	0.423051	0.687304	1.44584	ENSRNOT00000024896	Lipt1_predicted	PREDICTED: Rattus norvegicus lipoyltransferase 1 (predicted) (Lipt1_predicted), mRNA [XM_237067]		FALSE
A_42_P518462	0.00828401	0.000231543	-0.379752	-0.268468	0.320767	0.766564	0.916223	NM_001007020	Hmgn3	Rattus norvegicus high mobility group nucleosomal binding domain 3 (Hmgn3), mRNA [NM_001007020]	NM_001007020	FALSE
A_44_P1050554	0.0394445	0.0045837	-0.183499	0.0322179	0.186433	0.429434	0.798855	XM_218197	RGD1565545_predicted	PREDICTED: Rattus norvegicus similar to zinc finger protein ZFP (predicted) (RGD1565545_predicted), mRNA [XM_218197]	XM_218197	FALSE
A_42_P554928	0.0324848	0.00333186	0.324912	-0.213251	0.110098	0.446565	0.457135	AW144225	AW144225	AW144225 EST294521 Normalized rat ovary, Bento Soares Rattus sp. cDNA clone RGICN17 5' end, mRNA sequence [AW144225]	AW144225	FALSE
A_43_P20118	0.0110242	0.000415967	-0.00967467	0.254975	-0.123859	-0.418515	-1.61517	ENSRNOT00000007552	Suclg2	Suclg2 protein (Fragment). [Source:Uniprot/SPTREMBL;Acc:Q68FT4] [ENSRNOT00000007552]		FALSE
A_44_P699356	0.0146067	0.000747524	-0.0499654	-0.129804	0.262401	0.462052	1.41309	TC585764	TC585764	CHCH5_MOUSE (Q9CQP3) Coiled-coil-helix-coiled-coil-helix domain-containing protein 5, complete [TC585764]		FALSE
A_44_P443235	0.0162453	0.000920674	-0.264252	0.0444062	0.428675	0.750591	1.13731	NM_001011957	Ell3	Rattus norvegicus elongation factor RNA polymerase II-like 3 (Ell3), mRNA [NM_001011957]	NM_001011957	FALSE
A_44_P578054	0.00284077	1.94026e-05	0.214966	0.112037	0.335525	0.753836	1.58053	TC627260	TC627260	Q8K0F9_MOUSE (Q8K0F9) IQ motif containing C, partial (18%) [TC627260]		FALSE
A_44_P744519	0.0153595	0.000828671	-0.156222	0.334109	0.977189	1.24236	1.71046	NM_012992	Npm1	Rattus norvegicus nucleophosmin 1 (Npm1), mRNA [NM_012992]	NM_012992	FALSE
A_44_P405203	0.014321	0.000722965	-0.983539	-0.276482	0.169042	0.392218	0.898814	ENSRNOT00000015225	Hebp2_predicted	PREDICTED: Rattus norvegicus heme binding protein 2 (predicted) (Hebp2_predicted), mRNA [XM_218664]		FALSE
A_44_P452024	0.0247242	0.00201855	-0.233633	-0.154136	0.124119	0.396865	0.796566	NM_198789	Bzw1	Rattus norvegicus basic leucine zipper and W2 domains 1 (Bzw1), mRNA [NM_198789]	NM_198789	FALSE
A_44_P396239	0.0387696	0.00445853	-0.382001	-0.396816	0.0702935	0.0957155	0.623177	NM_001012093	Zfp64	Rattus norvegicus zinc finger protein 64 (Zfp64), mRNA [NM_001012093]	NM_001012093	FALSE
A_44_P896969	0.0359353	0.00387207	-0.121851	-0.240018	0.15659	0.22971	0.997572	NM_001008278	RGD1308696	Rattus norvegicus similar to hypothetical protein D11Ertd497e (RGD1308696), mRNA [NM_001008278]	NM_001008278	FALSE
A_44_P554795	0.0106719	0.000389859	-0.239855	0.153362	0.492987	0.603828	0.585913	NM_031152	Rab11a	Rattus norvegicus RAB11a, member RAS oncogene family (Rab11a), mRNA [NM_031152]	NM_031152	FALSE
A_44_P714531	0.0101883	0.000352859	-0.301476	-0.159257	0.292277	0.504324	1.05508	AW918102	AW918102	AW918102 EST349406 Rat gene index, normalized rat, norvegicus, Bento Soares Rattus norvegicus cDNA clone RGIEM38 5' end, mRNA sequence [AW918102]	AW918102	FALSE
A_42_P504250	0.0437799	0.00553743	0.0325226	0.44406	0.542388	0.822437	1.0458	ENSRNOT00000006101	RGD1309624_predicted	Rattus norvegicus similar to RIKEN cDNA 1810011O16 (LOC299043), mRNA [XM_216706]		FALSE
A_42_P586256	0.0103692	0.000371851	-0.255083	-0.259266	0.499238	0.621393	0.990313	NM_001008768	Prim1	Rattus norvegicus DNA primase, p49 subunit (Prim1), mRNA [NM_001008768]	NM_001008768	FALSE
A_44_P327830	0.020599	0.00145212	-0.0275732	-0.14507	-0.0416766	0.415414	1.7838	NM_182674	Bysl	Rattus norvegicus bystin-like (Bysl), mRNA [NM_182674]	NM_182674	FALSE
A_44_P1028460	0.019053	0.00128031	-0.545811	0.0659238	0.41512	0.514821	0.296033	NM_001004253	Syap1	Rattus norvegicus synapse associated protein 1 (Syap1), mRNA [NM_001004253]	NM_001004253	FALSE
A_44_P447957	0.00902749	0.000275079	-0.228154	0.104431	0.57908	1.01847	0.938648	ENSRNOT00000029049	ENSRNOT00000029049	PREDICTED: Rattus norvegicus aldo-keto reductase family 1, member C12 (predicted) (Akr1c12_predicted), mRNA [XM_341549]		FALSE
A_42_P715019	0.0105094	0.000379598	-0.275815	0.150689	-0.506743	-0.845621	-1.8283	XM_233144	RGD1311849_predicted	PREDICTED: Rattus norvegicus similar to mKIAA1797 protein (predicted) (RGD1311849_predicted), mRNA [XM_233144]	XM_233144	FALSE
A_42_P775698	0.00985541	0.000330586	-0.0392166	0.0167998	0.234775	0.608711	1.38101	NM_024363	Hrmt1l2	Rattus norvegicus heterogeneous nuclear ribonucleoproteins methyltransferase-like 2 (S. cerevisiae) (Hrmt1l2), mRNA [NM_024363]	NM_024363	FALSE
A_44_P355480	0.0120522	0.000507452	-0.54392	0.110104	0.479481	0.614472	0.992187	ENSRNOT00000054682	LOC682679	PREDICTED: Rattus norvegicus hypothetical protein LOC682679 (LOC682679), mRNA [XM_001062593]		FALSE
A_44_P386901	0.0049178	7.217e-05	0.0384134	-0.066245	0.421009	0.746922	1.24552	XR_007254	LOC290444	PREDICTED: Rattus norvegicus similar to eukaryotic translation initiation factor 3, subunit 12 (LOC290444), mRNA [XR_007254]	XR_007254	FALSE
A_44_P342416	0.0419176	0.00514967	-0.361435	0.0117915	0.557939	0.690088	0.90351	XR_005958	LOC364669	PREDICTED: Rattus norvegicus similar to ribosomal protein S27a (LOC364669), mRNA [XR_005958]	XR_005958	FALSE
A_43_P15033	0.0477229	0.00643556	0.580861	1.08384	1.09538	0.959815	0.16978	TC586420	TC586420	Q21J39_9ALTE (Q21J39) Oligopeptide ABC transporter permease protein, partial (8%) [TC586420]		FALSE
A_44_P384645	0.0284576	0.00259079	0.321797	0.318703	0.452378	0.652126	1.16725	ENSRNOT00000025695	Arv1_predicted	PREDICTED: Rattus norvegicus ARV1 homolog (yeast) (predicted) (Arv1_predicted), mRNA [XM_214713]		FALSE
A_44_P155816	0.0424328	0.00525796	0.925917	0.473288	0.383598	0.416302	-0.565638	NM_012947	Eef2k	Rattus norvegicus eukaryotic elongation factor-2 kinase (Eef2k), mRNA [NM_012947]	NM_012947	FALSE
A_44_P245563	0.00295932	2.15962e-05	-0.164136	0.17019	0.333654	0.799104	1.28915	NM_001008757	RGD1306249	Rattus norvegicus similar to RIKEN cDNA 2310015J09 (RGD1306249), mRNA [NM_001008757]	NM_001008757	FALSE
A_44_P1019324	0.00451246	5.24914e-05	0.136115	-0.248612	0.32723	0.671653	1.30347	NM_199372	Eif4a1	Rattus norvegicus eukaryotic translation initiation factor 4A1 (Eif4a1), mRNA [NM_199372]	NM_199372	FALSE
A_44_P332472	0.036545	0.00397648	-0.0317621	0.592894	0.865627	1.21953	1.6755	NM_133535	Cbwd1	Rattus norvegicus COBW domain containing 1 (Cbwd1), mRNA [NM_133535]	NM_133535	FALSE
A_42_P543226	0.0285621	0.00260976	0.0612839	0.44468	0.522278	0.688164	1.859	ENSRNOT00000011511	RGD1563365_predicted	AGENCOURT_27552711 NIH_MGC_254 Rattus norvegicus cDNA clone IMAGE:7314137 5', mRNA sequence [CO399392]		FALSE
A_43_P16639	0.0206793	0.0014644	-0.278665	0.326922	0.376131	0.189041	-0.688981	AY724480	LOC680782	Rattus norvegicus clone UI-R-FJ0-cpu-m-15-0-UI unknown mRNA [AY724480]	AY724480	FALSE
A_43_P11861	0.0196724	0.00134258	0.778435	0.579772	0.60171	0.418945	-0.667394	NM_017210	Dio3	Rattus norvegicus deiodinase, iodothyronine, type III (Dio3), mRNA [NM_017210]	NM_017210	FALSE
A_44_P1031390	0.00611581	0.000118472	0.217243	0.294453	0.594453	0.996633	1.43131	NM_001003708	Trappc4	Rattus norvegicus trafficking protein particle complex 4 (Trappc4), mRNA [NM_001003708]	NM_001003708	FALSE
A_44_P183488	0.0426642	0.00530257	-0.141743	0.37158	0.684987	0.695575	0.557058	NM_022260	Casp7	Rattus norvegicus caspase 7 (Casp7), mRNA [NM_022260]	NM_022260	FALSE
A_44_P576902	0.0206793	0.00145975	0.475356	0.920064	1.13972	0.683149	-1.3124	TC591531	TC591531			FALSE
A_44_P810190	0.0456586	0.00598122	0.141572	0.595435	0.741928	0.986864	1.48447	XM_001076594	LOC686980	PREDICTED: Rattus norvegicus similar to arsenate resistance protein 2 (LOC686980), mRNA [XM_001076594]	XM_001076594	FALSE
A_44_P252921	0.00591173	0.000109786	0.057718	0.00098741	0.0965412	0.330036	1.01545	BC098824	Sec23ip	Rattus norvegicus SEC23 interacting protein, mRNA (cDNA clone IMAGE:7377967), complete cds. [BC098824]	BC098824	FALSE
A_43_P14688	0.0184231	0.00119747	0.482016	0.676072	0.759052	0.575182	-0.226444	TC592161	TC592161	Q8TJH1_METAC (Q8TJH1) Predicted protein, partial (8%) [TC592161]		FALSE
A_44_P143886	0.0360792	0.0039045	0.446997	0.383623	0.235433	-0.503614	-2.13479	NM_022392	Insig1	Rattus norvegicus insulin induced gene 1 (Insig1), mRNA [NM_022392]	NM_022392	FALSE
A_44_P621723	0.00609683	0.000117453	-0.567015	-0.0903392	0.226161	0.670019	1.83281	ENSRNOT00000029566	ENSRNOT00000029566			FALSE
A_44_P269843	0.0195255	0.0013233	0.0856353	-0.0516623	0.412915	0.573853	0.743036	NM_001037768	Nagk	Rattus norvegicus N-acetylglucosamine kinase (Nagk), mRNA [NM_001037768]	NM_001037768	FALSE
A_44_P356027	0.0115934	0.00047329	0.653882	0.621765	0.366523	0.160822	-1.27383	NM_053642	Sc5d	Rattus norvegicus sterol-C5-desaturase (fungal ERG3, delta-5-desaturase) homolog (S. cerevisae) (Sc5d), mRNA [NM_053642]	NM_053642	FALSE
A_42_P478500	0.0149723	0.00079112	0.701417	0.821657	0.522178	0.292217	-0.660752	NM_177421	Slc22a17	Rattus norvegicus solute carrier family 22 (organic cation transporter), member 17 (Slc22a17), mRNA [NM_177421]	NM_177421	FALSE
A_44_P443367	0.0342918	0.00357027	1.33182	0.366679	-0.0587145	-0.0406344	-0.188601	XM_343646	XM_343646	Rattus norvegicus similar to RIKEN cDNA 4933431D05 (LOC363305), mRNA [XM_343646]	XM_343646	FALSE
A_44_P381822	0.0331631	0.0034156	0.031381	0.154313	-0.0359561	-0.159269	-0.92371	ENSRNOT00000050919	ENSRNOT00000050919	Succinate semialdehyde dehydrogenase (EC 1.2.1.24) (NAD(+)-dependent succinic semialdehyde dehydrogenase). [Source:Uniprot/SWISSPROT;Acc:P51650] [ENSRNOT00000050919]		FALSE
A_44_P165692	0.0480235	0.00651621	-0.264887	0.248194	-0.0607777	-0.384444	-1.4651	NM_001034003	RGD1308874	Rattus norvegicus similar to RIKEN cDNA 2310001A20 (RGD1308874), mRNA [NM_001034003]	NM_001034003	FALSE
A_44_P364678	0.0091711	0.000287078	-0.178443	-0.119873	-0.000781	0.427528	1.13555	BF550568	BF550568	BF550568 UI-R-C0-jl-b-08-0-UI.r1 UI-R-C0 Rattus norvegicus cDNA clone UI-R-C0-jl-b-08-0-UI 5', mRNA sequence [BF550568]	BF550568	FALSE
A_44_P507829	0.0179088	0.0011411	-0.289538	0.0263949	0.0954118	-0.146868	-1.20433	AI176590	AI176590	AI176590 EST220178 Normalized rat ovary, Bento Soares Rattus sp. cDNA clone ROVBU25 3' end, mRNA sequence [AI176590]	AI176590	FALSE
A_43_P12216	0.0399381	0.0046803	-0.328182	0.268134	0.400624	0.609977	0.797823	NM_022387	Pafah1b2	Rattus norvegicus platelet-activating factor acetylhydrolase, isoform 1b, alpha2 subunit (Pafah1b2), mRNA [NM_022387]	NM_022387	FALSE
A_44_P515768	0.0137771	0.00067713	-0.126111	-0.0220879	0.261715	0.718701	1.73926	NM_001047095	RGD1305727_predicted	Rattus norvegicus similar to Protein CGI-117 (Protein HSPC111) (predicted) (RGD1305727_predicted), mRNA [NM_001047095]	NM_001047095	FALSE
A_44_P139291	0.0461966	0.00612372	-0.00332397	-0.426494	-1.0988	-1.35159	-2.53764	ENSRNOT00000002576	ENSRNOT00000002576	BE113304 UI-R-BJ1-awe-c-07-0-UI.s1 UI-R-BJ1 Rattus norvegicus cDNA clone UI-R-BJ1-awe-c-07-0-UI 3', mRNA sequence [BE113304]		FALSE
A_44_P978083	0.0407293	0.00488425	-0.136414	0.0178958	0.391434	0.681212	0.674101	TC599671	TC599671	PP25_HUMAN (Q9Y547) Placental protein 25 (PP25), partial (95%) [TC599671]		FALSE
A_44_P423365	0.0145856	0.000745663	-0.190254	-0.0550736	-0.490119	-0.633526	-2.41048	AW143634	AW143634	AW143634 EST293930 Normalized rat embryo, Bento Soares Rattus sp. cDNA clone RGIBX04 5' end, mRNA sequence [AW143634]	AW143634	FALSE
A_44_P809374	0.0261855	0.00223801	0.276485	-0.418651	-0.063075	0.617645	1.17094	NM_207615	Clcf1	Rattus norvegicus cardiotrophin-like cytokine factor 1 (Clcf1), mRNA [NM_207615]	NM_207615	FALSE
A_43_P16759	0.0130803	0.000614264	-0.0727326	0.279755	0.634609	0.809645	0.858676	XM_214197	XM_214197	Rattus norvegicus similar to gamma2-adaptin (LOC290215), mRNA [XM_214197]	XM_214197	FALSE
A_44_P477971	0.00481519	6.23815e-05	0.0269647	0.411797	0.681584	0.817741	1.26731	XM_341069	RGD1560258_predicted	PREDICTED: Rattus norvegicus similar to RIKEN cDNA 4930579G22 (predicted) (RGD1560258_predicted), mRNA [XM_341069]	XM_341069	FALSE
A_44_P775866	0.0124563	0.000542823	0.416869	0.152312	0.0443859	-0.204578	-1.59422	NM_001079709	RGD1565917_predicted	Rattus norvegicus similar to peroxisomal acyl-CoA thioesterase Ic (predicted) (RGD1565917_predicted), mRNA [NM_001079709]	NM_001079709	FALSE
A_44_P558641	0.0135317	0.000654237	0.60704	0.477193	0.450501	0.26211	-0.649638	NM_012559	Fgg	Rattus norvegicus fibrinogen, gamma polypeptide (Fgg), mRNA [NM_012559]	NM_012559	FALSE
A_43_P12884	0.0188789	0.00124543	0.166078	-0.307647	-0.590936	-1.23549	-2.41205	NM_053646	Asah2	Rattus norvegicus N-acylsphingosine amidohydrolase 2 (Asah2), mRNA [NM_053646]	NM_053646	FALSE
A_44_P252775	0.0286896	0.00263487	0.207708	-0.176023	0.0748553	0.26978	0.799416	ENSRNOT00000059328	ENSRNOT00000059328	PREDICTED: Rattus norvegicus similar to histone 2a (LOC680615), mRNA [XM_001058007]		FALSE
A_42_P650709	0.0136958	0.000669387	-0.00239718	-0.051479	0.333044	0.568424	0.782191	NM_001008288	RGD1306954	Rattus norvegicus similar to RIKEN cDNA 1110004E09 (RGD1306954), mRNA [NM_001008288]	NM_001008288	FALSE
A_42_P477732	0.00749998	0.000177317	0.329806	0.747067	0.504051	0.132968	-1.87649	NM_017047	Slc10a1	Rattus norvegicus solute carrier family 10 (sodium/bile acid cotransporter family), member 1 (Slc10a1), mRNA [NM_017047]	NM_017047	FALSE
A_44_P531511	0.00258304	1.30951e-05	0.0916632	0.0794834	0.313152	0.711914	1.87991	ENSRNOT00000010252	Rars_predicted	PREDICTED: Rattus norvegicus arginyl-tRNA synthetase (predicted) (Rars_predicted), mRNA [XM_213276]		FALSE
A_44_P420640	0.0404149	0.00480726	-0.330381	-0.0640687	0.29963	0.594202	1.08164	XM_001068349	LOC683983	PREDICTED: Rattus norvegicus similar to Nucleoporin Nup43 (LOC683983), mRNA [XM_001068349]	XM_001068349	FALSE
A_44_P222878	0.0239404	0.00191636	-0.767674	-0.14796	0.17405	0.25213	0.324126	NM_001034134	Eif3s6ip	Rattus norvegicus eukaryotic translation initiation factor 3, subunit 6 interacting protein (Eif3s6ip), mRNA [NM_001034134]	NM_001034134	FALSE
A_43_P20296	0.0434659	0.00547357	-0.924473	0.0366227	0.281464	0.377069	0.228617	NM_001014196	RGD1309207	Rattus norvegicus similar to putative phosphatase subunit (RGD1309207), mRNA [NM_001014196]	NM_001014196	FALSE
A_44_P354255	0.00633533	0.000129112	-0.51337	0.114362	0.994674	1.56165	1.74541	XR_007019	LOC691091	PREDICTED: Rattus norvegicus similar to heat shock protein 1, alpha (LOC691091), mRNA [XR_007019]	XR_007019	FALSE
A_44_P760650	0.0158898	0.000871697	0.063047	0.240397	0.538713	0.805249	1.45557	ENSRNOT00000024085	RGD1562823_predicted	PREDICTED: Rattus norvegicus similar to RIKEN cDNA 2510038A11 (predicted) (RGD1562823_predicted), mRNA [XM_576310]		FALSE
A_44_P227281	0.023221	0.00181176	-0.312423	0.227061	0.756029	0.895668	1.09745	NM_001008309	Btf3	Rattus norvegicus basic transcription factor 3 (Btf3), mRNA [NM_001008309]	NM_001008309	FALSE
A_44_P1030747	0.00222533	5.57802e-06	-0.444694	-0.285737	0.646838	1.27771	2.79736	BC062051	Bspry	Rattus norvegicus B-box and SPRY domain containing, mRNA (cDNA clone IMAGE:5598845), partial cds [BC062051]	BC062051	FALSE
A_44_P472011	0.0132581	0.000628888	-0.281798	0.0508854	0.423052	0.872745	1.21553	NM_194461	Pigw	Rattus norvegicus phosphatidylinositol glycan, class W (Pigw), mRNA [NM_194461]	NM_194461	FALSE
A_44_P456836	0.0241822	0.00194744	0.407564	0.0328573	0.0737937	-0.0718536	-0.376091	ENSRNOT00000049443	ENSRNOT00000049443	Acidic proline-rich protein PRP25 precursor (Fragment). [Source:Uniprot/SWISSPROT;Acc:P10164] [ENSRNOT00000049443]		FALSE
A_43_P17239	0.0385107	0.00440863	0.65519	0.192184	-0.226244	-0.105995	-0.794578	ENSRNOT00000046539	RGD1562920_predicted	PREDICTED: Rattus norvegicus similar to Aig1 protein (predicted) (RGD1562920_predicted), mRNA [XM_214790]		FALSE
A_44_P235848	0.00772366	0.000190281	0.0269008	0.428236	0.772443	0.887346	0.927731	XM_341947	Bccip_predicted	PREDICTED: Rattus norvegicus BRCA2 and CDKN1A interacting protein (predicted) (Bccip_predicted), mRNA [XM_341947]	XM_341947	FALSE
A_44_P1039213	0.00717365	0.000163329	0.434746	0.249127	-0.414766	-1.00344	-2.12605	NM_001013083	Cpa2_predicted	Rattus norvegicus carboxypeptidase A2 (pancreatic) (predicted) (Cpa2_predicted), mRNA [NM_001013083]	NM_001013083	FALSE
A_43_P14565	0.0432677	0.0054277	0.082517	0.138786	0.587774	0.883967	1.15364	ENSRNOT00000004939	RGD1559740_predicted	PREDICTED: Rattus norvegicus similar to Protein HSPC163 (predicted) (RGD1559740_predicted), mRNA [XM_213960]		FALSE
A_42_P640277	0.0388779	0.00448344	0.0259005	0.396004	0.824255	1.32144	2.06139	NM_001003401	Enc1	Rattus norvegicus ectodermal-neural cortex 1 (Enc1), mRNA [NM_001003401]	NM_001003401	FALSE
A_44_P777164	0.0365996	0.00398633	-0.070097	0.470409	0.514832	0.560676	1.20023	CB608258	CB608258	AMGNNUC:SRCS1-00004-D3-A srcs1 (10883) Rattus norvegicus cDNA clone srcs1-00004-d3 5', mRNA sequence [CB608258]	CB608258	FALSE
A_42_P796827	0.0401206	0.00471881	0.197965	0.617837	0.96153	0.896659	1.54233	NM_001005535	Ddx59	Rattus norvegicus DEAD (Asp-Glu-Ala-Asp) box polypeptide 59 (Ddx59), mRNA [NM_001005535]	NM_001005535	FALSE
A_44_P272894	0.040421	0.00482253	0.174283	0.143357	0.238518	-0.187496	-2.12073	NM_031238	Sh3gl3	Rattus norvegicus SH3-domain GRB2-like 3 (Sh3gl3), mRNA [NM_031238]	NM_031238	FALSE
A_44_P174721	0.0224678	0.00167498	-0.169045	-0.0336693	0.179857	0.375909	1.0898	ENSRNOT00000011609	RGD1307882_predicted	similar to RIKEN cDNA 2610101N10 (predicted) (RGD1566227_predicted), mRNA [Source:RefSeq_dna;Acc:XR_007733] [ENSRNOT00000011609]		FALSE
A_43_P18712	0.0268259	0.00233249	0.0418087	0.871454	0.830009	1.04913	1.52633	NM_001014246	RGD1309482	Rattus norvegicus similar to chromosome 10 open reading frame 4; similar to putative acid phosphatase F26C11.1 (RGD1309482), mRNA [NM_001014246]	NM_001014246	FALSE
A_44_P239300	0.0352992	0.00374297	0.2051	0.00293601	-0.298066	-0.584886	-2.01856	XM_221198	XM_221198	Rattus norvegicus hypothetical LOC303743 (LOC303743), mRNA [XM_221198]	XM_221198	FALSE
A_44_P775779	0.0286866	0.00262843	-0.0849966	-0.240762	-0.378713	-0.717737	-1.36339	XR_005481	LOC500370	PREDICTED: Rattus norvegicus similar to Adenosylhomocysteinase (S-adenosyl-L-homocysteine hydrolase) (AdoHcyase) (Liver copper-binding protein) (CUBP) (LOC500370), mRNA [XR_005481]	XR_005481	FALSE
A_44_P665075	0.00976589	0.000323834	-0.0487999	0.163051	-0.141965	-0.522166	-2.0323	NM_001025720	Dhtkd1	Rattus norvegicus dehydrogenase E1 and transketolase domain containing 1 (Dhtkd1), mRNA [NM_001025720]	NM_001025720	FALSE
A_42_P543374	0.0105669	0.000383452	-0.464289	-0.318318	-0.183801	-0.111562	0.96081	NM_053679	Dffa	Rattus norvegicus DNA fragmentation factor, alpha subunit (Dffa), mRNA [NM_053679]	NM_053679	FALSE
A_42_P508984	0.0281621	0.00255042	1.55759	-0.344932	0.51678	0.66939	1.25247	NM_001007729	Cxcl4	Rattus norvegicus chemokine (C-X-C motif) ligand 4 (Cxcl4), mRNA [NM_001007729]	NM_001007729	FALSE
A_44_P358492	0.0351779	0.00372072	0.00585282	0.50536	0.586138	0.310093	-1.38226	NM_019238	Fdft1	Rattus norvegicus farnesyl diphosphate farnesyl transferase 1 (Fdft1), mRNA [NM_019238]	NM_019238	FALSE
A_44_P1003372	0.00861418	0.000245935	-0.422949	0.431256	0.226045	0.0513334	-0.964642	NM_001005539	Smpdl3a	Rattus norvegicus sphingomyelin phosphodiesterase, acid-like 3A (Smpdl3a), mRNA [NM_001005539]	NM_001005539	FALSE
A_42_P746089	0.020754	0.00147301	0.214428	0.0110641	0.412512	0.609107	0.938732	XM_001059359	LOC680891	PREDICTED: Rattus norvegicus similar to Splicing factor 3B subunit 5 (SF3b5) (Pre-mRNA splicing factor SF3b 10 kDa subunit) (LOC680891), mRNA [XM_001059359]	XM_001059359	FALSE
A_44_P701209	0.0281621	0.00254662	0.538069	0.420674	0.168825	-0.0170283	-1.13719	DV728455	DV728455	RVL21095 Wackym-Soares normalized rat vestibular cDNA library Rattus norvegicus cDNA 5', mRNA sequence [DV728455]	DV728455	FALSE
A_43_P10054	0.040835	0.00491774	0.396307	0.77023	1.09279	1.21827	1.06682	BC105828	Osbpl9_predicted	Rattus norvegicus oxysterol binding protein-like 9 (predicted), mRNA (cDNA clone IMAGE:7381705), complete cds. [BC105828]	BC105828	FALSE
A_44_P845543	0.0306882	0.0029603	0.651911	0.763846	0.22863	-0.388944	-0.749872	A_44_P845543	A_44_P845543			FALSE
A_44_P287842	0.0229148	0.00175967	-0.557239	-0.520603	0.257585	0.713713	0.349641	NM_138512	Cyp2c70	Rattus norvegicus cytochrome P450, family 2, subfamily c, polypeptide 70 (Cyp2c70), mRNA [NM_138512]	NM_138512	FALSE
A_44_P184110	0.0232296	0.00181979	-0.188829	0.164045	0.0329294	-0.357853	-0.950689	AI101158	AI101158	AI101158 EST210447 Normalized rat brain, Bento Soares Rattus sp. cDNA clone RBRBG29 3' end, mRNA sequence [AI101158]	AI101158	FALSE
A_44_P592238	0.0338332	0.003511	0.167429	0.502337	0.638985	0.775971	1.36509	TC605923	TC605923			FALSE
A_44_P149896	0.0437775	0.00553439	1.24703	0.24325	-0.270861	0.231745	0.0991419	NM_001014221	LOC363337	Rattus norvegicus similar to RIKEN cDNA 1700081O22 (LOC363337), mRNA [NM_001014221]	NM_001014221	FALSE
A_44_P869351	0.0226502	0.00170689	-0.0653123	0.21981	0.0330476	0.288927	2.01246	XM_230548	RGD1308877_predicted	PREDICTED: Rattus norvegicus similar to CGI-09 protein (predicted) (RGD1308877_predicted), mRNA [XM_230548]	XM_230548	FALSE
A_44_P522482	0.0166158	0.000969812	-0.168817	0.158101	0.597879	0.726784	0.904981	NM_001013928	LOC297756	Rattus norvegicus ribosomal protein S8-like (LOC297756), mRNA [NM_001013928]	NM_001013928	FALSE
A_44_P444343	0.0138524	0.000683047	0.111958	-0.126952	0.340145	0.488625	1.15401	AW142434	AW142434	AW142434 EST292686 Normalized rat embryo, Bento Soares Rattus sp. cDNA clone RGIAL65 5' end, mRNA sequence [AW142434]	AW142434	FALSE
A_43_P15212	0.037877	0.00426493	0.192938	0.404919	0.853176	1.06461	1.31947	NM_001007652	Pole3	Rattus norvegicus polymerase (DNA directed), epsilon 3 (p17 subunit) (Pole3), mRNA [NM_001007652]	NM_001007652	FALSE
A_44_P1007449	0.00534073	9.00619e-05	0.597939	0.938442	0.354456	-0.164621	-1.43013	XM_222190	RGD1310159_predicted	Rattus norvegicus similar to acetyl-coA dehydrogenase -related (111.6 kD) (5G231) (LOC304500), mRNA [XM_222190]	XM_222190	FALSE
A_44_P123473	0.016935	0.00101489	0.0707425	-0.215358	0.314946	0.443045	0.899296	NM_001004237	Aurkaip1	Rattus norvegicus aurora kinase A interacting protein 1 (Aurkaip1), mRNA [NM_001004237]	NM_001004237	FALSE
A_43_P23404	0.0301169	0.00286238	0.413807	-0.194987	-0.370836	-0.13705	-0.743191	NM_001024899	Sufu	Rattus norvegicus suppressor of fused (Sufu), mRNA [NM_001024899]	NM_001024899	FALSE
A_44_P363494	0.0234581	0.00184395	-0.512058	-0.102911	0.133035	0.277984	0.970349	XR_007323	RGD1563847_predicted	PREDICTED: Rattus norvegicus similar to karyopherin (importin) alpha 2 (predicted) (RGD1563847_predicted), mRNA [XR_007323]	XR_007323	FALSE
A_44_P438641	0.00890306	0.000264635	0.002388	0.229197	0.836262	1.16375	1.73684	XM_213108	LOC300303	PREDICTED: Rattus norvegicus similar to Nucleophosmin (NPM) (Nucleolar phosphoprotein B23) (Numatrin) (Nucleolar protein NO38) (LOC300303), mRNA [XM_213108]	XM_213108	FALSE
A_44_P822950	0.0438415	0.00555274	0.197251	0.336672	0.584347	0.828156	1.41243	AW916957	AW916957	AW916957 EST348261 Rat gene index, normalized rat, norvegicus, Bento Soares Rattus norvegicus cDNA clone RGIDX19 5' end, mRNA sequence [AW916957]	AW916957	FALSE
A_44_P368723	0.0162956	0.000929612	-0.211522	0.509882	1.03903	1.20725	1.50685	BF553091	BF553091	BF553091 UI-R-C2-mv-c-12-0-UI.r1 UI-R-C2 Rattus norvegicus cDNA clone UI-R-C2-mv-c-12-0-UI 5', mRNA sequence [BF553091]	BF553091	FALSE
A_44_P215056	0.0166451	0.000974421	1.09746	1.97401	1.37832	0.857595	-0.284297	NM_001007235	Itpr1	Rattus norvegicus inositol 1,4,5-triphosphate receptor 1 (Itpr1), mRNA [NM_001007235]	NM_001007235	FALSE
A_44_P165820	0.0106719	0.000390608	0.421028	0.788531	0.616445	0.386813	-0.231397	NM_130428	Sdha	Rattus norvegicus succinate dehydrogenase complex, subunit A, flavoprotein (Fp) (Sdha), mRNA [NM_130428]	NM_130428	FALSE
A_44_P161579	0.0432677	0.00542226	-0.659985	0.181871	0.169515	0.444295	0.808289	CO404386	CO404386	AGENCOURT_26758114 NIH_MGC_255 Rattus norvegicus cDNA clone IMAGE:7317895 5', mRNA sequence [CO404386]	CO404386	FALSE
A_42_P676860	0.00274976	1.55544e-05	0.156408	0.374994	0.619249	0.973224	2.07709	ENSRNOT00000003974	ENSRNOT00000003974	PREDICTED: Rattus norvegicus hypothetical LOC287388 (predicted) (RGD1310324_predicted), mRNA [XR_009188]		FALSE
A_44_P868863	0.0169216	0.00100957	0.015646	0.566383	0.606613	0.633061	1.17775	TC587169	TC587169			FALSE
A_44_P974063	0.00284077	1.98591e-05	0.242116	0.27319	0.331469	-0.109424	-1.10302	BF284864	BF284864	BF284864 EST449455 Rat Gene Index, normalized rat, Rattus norvegicus cDNA Rattus norvegicus cDNA clone RGIEX25, mRNA sequence [BF284864]	BF284864	FALSE
A_44_P176416	0.0077246	0.000196734	-0.384691	-0.0972388	0.146123	0.421767	0.872293	XM_001053680	RGD1564300_predicted	PREDICTED: Rattus norvegicus similar to phosphoseryl-tRNA kinase (predicted) (RGD1564300_predicted), mRNA [XM_001053680]	XM_001053680	FALSE
A_44_P233425	0.037877	0.00425871	-0.417788	0.952607	0.575566	0.566951	0.358041	NM_001011922	Nedd9	Rattus norvegicus neural precursor cell expressed, developmentally down-regulated gene 9 (Nedd9), mRNA [NM_001011922]	NM_001011922	FALSE
A_42_P700879	0.0215178	0.00156971	-0.0273257	0.127034	0.394804	0.511084	0.736924	NM_001013957	Pqbp1	Rattus norvegicus polyglutamine binding protein 1 (Pqbp1), mRNA [NM_001013957]	NM_001013957	FALSE
A_44_P182881	0.0232443	0.00182218	-0.352536	0.126268	-0.127341	0.457553	1.52056	NM_001013160	Rnf36	Rattus norvegicus ring finger protein 36 (Rnf36), mRNA [NM_001013160]	NM_001013160	FALSE
A_44_P187676	0.00976589	0.000321671	0.216947	0.421297	0.377167	0.617234	0.880997	XM_234706	RGD1306493_predicted	PREDICTED: Rattus norvegicus similar to hypothetical protein FLJ10300 (predicted) (RGD1306493_predicted), mRNA [XM_234706]	XM_234706	FALSE
A_44_P341075	0.00136988	8.71489e-07	0.197489	-0.207358	-1.01054	-1.75811	-3.67547	NM_057104	Enpp2	Rattus norvegicus ectonucleotide pyrophosphatase/phosphodiesterase 2 (Enpp2), mRNA [NM_057104]	NM_057104	FALSE
A_44_P337554	0.00706923	0.000156935	0.626052	0.473559	0.247651	0.046386	-0.507	ENSRNOT00000015352	RGD1563497_predicted	PREDICTED: Rattus norvegicus similar to Gnefr protein (predicted) (RGD1563497_predicted), mRNA [XM_344891]		FALSE
A_44_P463745	0.0397691	0.00464351	-0.559468	0.631103	0.803455	0.879709	1.18749	NM_139194	Tnfrsf6	Rattus norvegicus Tumor necrosis factor receptor superfamily, member 6 (Tnfrsf6), mRNA [NM_139194]	NM_139194	FALSE
A_44_P1008094	0.0311897	0.0030764	0.249594	0.666716	0.731383	0.835763	1.25484	ENSRNOT00000005975	Exosc7	Exosc7 protein (Fragment). [Source:Uniprot/SPTREMBL;Acc:Q5EB65] [ENSRNOT00000005975]		FALSE
A_44_P475444	0.0027617	1.57693e-05	0.0390074	0.394336	0.197451	-0.0481181	-1.00174	AF436847	Cfh	Rattus norvegicus complement factor H-related protein mRNA, complete cds. [AF436847]	AF436847	FALSE
A_44_P469357	0.0171227	0.00104258	-0.187518	0.0780238	0.483953	0.699686	1.15675	ENSRNOT00000017409	RGD1565840_predicted	PREDICTED: Rattus norvegicus similar to Dendritic cell protein GA17 (predicted) (RGD1565840_predicted), mRNA [XM_215794]		FALSE
A_44_P996917	0.0388011	0.0044663	0.108462	0.0837549	0.34559	0.527247	0.883023	NM_001013898	RGD1311703	Rattus norvegicus similar to sid2057p (RGD1311703), mRNA [NM_001013898]	NM_001013898	FALSE
A_44_P731083	0.0147691	0.00076923	0.438543	0.120914	0.267532	0.535493	1.56375	TC603037	TC603037	Q4SH17_TETNG (Q4SH17) Chromosome 8 SCAF14587, whole genome shotgun sequence, partial (5%) [TC603037]		FALSE
A_44_P262065	0.00284077	1.92976e-05	0.30875	0.193657	0.0394382	-0.479957	-1.6034	NM_182474	LOC299282	Rattus norvegicus Serine protease inhibitor (LOC299282), mRNA [NM_182474]	NM_182474	FALSE
A_44_P633489	0.0459799	0.00606064	0.0204432	0.269399	0.244859	0.0864787	-0.591284	DV723525	DV723525	RVL15340 Wackym-Soares normalized rat vestibular cDNA library Rattus norvegicus cDNA 5', mRNA sequence [DV723525]	DV723525	FALSE
A_44_P637897	0.0111021	0.000424846	0.0870447	0.0975842	0.438863	0.528108	0.909183	XM_001064606	LOC685634	PREDICTED: Rattus norvegicus hypothetical protein LOC685634 (LOC685634), mRNA [XM_001064606]	XM_001064606	FALSE
A_44_P485948	0.00717365	0.000162726	0.415515	0.814952	0.470012	0.119145	-1.55338	XM_222184	Cutl2_predicted	PREDICTED: Rattus norvegicus cut-like 2 (Drosophila) (predicted) (Cutl2_predicted), mRNA [XM_222184]	XM_222184	FALSE
A_44_P911768	0.0089295	0.000266214	0.703916	0.319899	0.0739799	0.055037	-0.276727	XM_001077248	Hcn2	PREDICTED: Rattus norvegicus hyperpolarization activated cyclic nucleotide-gated potassium channel 2 (Hcn2), mRNA [XM_001077248]	XM_001077248	FALSE
A_44_P390495	0.025163	0.00207062	-0.522415	-0.0163087	0.182259	0.379951	0.523796	NM_024356	Gch	Rattus norvegicus GTP cyclohydrolase 1 (Gch), mRNA [NM_024356]	NM_024356	FALSE
A_44_P307313	0.0385107	0.0043998	0.152194	0.329191	0.58787	0.70826	0.613471	NM_001007804	Snf8	Rattus norvegicus SNF8, ESCRT-II complex subunit, homolog (S. cerevisiae) (Snf8), mRNA [NM_001007804]	NM_001007804	FALSE
A_44_P1057707	0.0146255	0.000752888	-0.371444	0.105677	0.247663	0.899199	1.94536	NM_199083	LOC289809	Rattus norvegicus putatative 28 kDa protein (LOC289809), mRNA [NM_199083]	NM_199083	FALSE
A_42_P772965	0.00985782	0.000332339	0.399086	0.699355	0.53444	0.114409	-0.575823	ENSRNOT00000020325	Aldh7a1	Aldehyde dehydrogenase family 7 member A1 (EC 1.2.1.3) (Antiquitin-1) (Fragment). [Source:Uniprot/SWISSPROT;Acc:Q64057] [ENSRNOT00000020325]		FALSE
A_42_P671364	0.0210575	0.00151253	-0.970739	-0.784536	-0.117874	-0.0882852	0.0931942	NM_053631	Banf1	Rattus norvegicus barrier to autointegration factor 1 (Banf1), mRNA [NM_053631]	NM_053631	FALSE
A_44_P206417	0.0205728	0.00144698	-0.0561117	0.10184	0.521461	0.576795	0.858649	A_44_P206417	A_44_P206417			FALSE
A_44_P848951	0.0169078	0.00100514	-0.0400143	-0.0343587	0.52833	1.05039	2.15399	AW915522	AW915522	AW915522 EST346826 Normalized rat embryo, Bento Soares Rattus sp. cDNA clone RGICW33 5' end, mRNA sequence [AW915522]	AW915522	FALSE
A_42_P471271	0.0149723	0.000794882	-0.0594953	0.368976	0.740818	0.908878	1.18317	NM_053908	Ptpn6	Rattus norvegicus protein tyrosine phosphatase, non-receptor type 6 (Ptpn6), mRNA [NM_053908]	NM_053908	FALSE
A_44_P528706	0.0225442	0.00169511	-0.0883923	0.0430063	0.470525	0.65503	1.06187	AW141558	AW141558	AW141558 EST291617 Normalized rat embryo, Bento Soares Rattus sp. cDNA clone RGIBZ29 5' end similar to H.sapiens hypothetical protein KIAA0648, mRNA sequence [AW141558]	AW141558	FALSE
A_44_P410341	0.032344	0.00330361	-0.180152	0.26314	0.587337	0.991188	1.11417	ENSRNOT00000021850	Ipp_predicted	PREDICTED: Rattus norvegicus IAP promoted placental gene (predicted) (Ipp_predicted), mRNA [XM_233415]		FALSE
A_44_P456564	0.0449399	0.00580194	-0.264636	-0.44729	-0.127445	0.0339785	0.834504	NM_199086	Nob1p	Rattus norvegicus nin one binding protein (Nob1p), mRNA [NM_199086]	NM_199086	FALSE
A_44_P718743	0.0323073	0.00328952	1.33827	1.27136	0.901915	1.15333	-0.655573	TC648865	TC648865			FALSE
A_44_P306032	0.0403949	0.00479181	0.196894	0.414493	0.475034	0.845087	1.46729	AA963008	AA963008	UI-R-E1-gd-e-02-0-UI.s1 UI-R-E1 Rattus norvegicus cDNA clone UI-R-E1-gd-e-02-0-UI 3', mRNA sequence [AA963008]	AA963008	FALSE
A_44_P108108	0.0110242	0.000416518	-0.01329	0.619015	0.828389	1.03636	1.24895	ENSRNOT00000002173	Usp16	Usp16 protein (Fragment). [Source:Uniprot/SPTREMBL;Acc:Q2KJ09] [ENSRNOT00000002173]		FALSE
A_44_P1002693	0.00938914	0.000301631	0.0729235	-0.0158757	0.191586	0.480685	0.861814	XM_341741	Hddc2_predicted	PREDICTED: Rattus norvegicus HD domain containing 2 (predicted) (Hddc2_predicted), mRNA [XM_341741]	XM_341741	FALSE
A_44_P468728	0.00151364	1.93381e-06	1.1105	0.91317	0.128482	-0.468484	-1.49842	NM_001014146	RGD1308114	Rattus norvegicus similar to cDNA sequence AF397014 (RGD1308114), mRNA [NM_001014146]	NM_001014146	FALSE
A_44_P456852	0.010121	0.000348828	-0.418085	0.050907	0.326468	0.66691	0.988096	NM_053414	Ddx1	Rattus norvegicus DEAD (Asp-Glu-Ala-Asp) box polypeptide 1 (Ddx1), mRNA [NM_053414]	NM_053414	FALSE
A_44_P558048	0.0262781	0.00225213	-0.11786	-0.314013	-0.197353	0.448213	1.623	NM_001033897	RGD1309387	Rattus norvegicus similar to cDNA sequence AF155546 (RGD1309387), mRNA [NM_001033897]	NM_001033897	FALSE
A_44_P351301	0.017681	0.00111625	-0.473776	-0.422683	-0.234259	0.344109	1.09016	NM_001004206	Pa2g4	Rattus norvegicus proliferation-associated 2G4 (Pa2g4), mRNA [NM_001004206]	NM_001004206	FALSE
A_44_P473234	0.0347432	0.00364724	-0.154864	-0.241849	0.00358665	0.201911	1.48234	ENSRNOT00000024858	Zfp688_predicted	PREDICTED: Rattus norvegicus zinc finger protein 688 (predicted) (Zfp688_predicted), mRNA [XM_215090]		FALSE
A_42_P631493	0.030012	0.00284625	0.389187	0.0655595	0.471195	0.738291	1.63318	NM_031979	Csda	Rattus norvegicus cold shock domain protein A (Csda), mRNA [NM_031979]	NM_031979	FALSE
A_44_P119713	0.0297797	0.00279919	0.060656	0.0487096	0.46886	0.571431	1.0213	AW535026	AW535026	AW535026 UI-R-BS0-aoa-d-04-0-UI.s1 UI-R-BS0 Rattus norvegicus cDNA clone UI-R-BS0-aoa-d-04-0-UI 3', mRNA sequence [AW535026]	AW535026	FALSE
A_44_P239176	0.00900868	0.00027115	0.102219	0.3896	0.672459	0.898168	1.12701	NM_001008380	RGD1308959	Rattus norvegicus similar to expressed sequence AV340375 (RGD1308959), mRNA [NM_001008380]	NM_001008380	FALSE
A_43_P17863	0.0314489	0.00313499	0.124414	0.66473	0.899246	1.14886	1.34336	NM_001012131	Inpp1	Rattus norvegicus inositol polyphosphate-1-phosphatase (Inpp1), mRNA [NM_001012131]	NM_001012131	FALSE
A_44_P589702	0.00814469	0.000218078	0.624472	0.756076	0.431427	0.12847	-0.774019	XM_227870	Clcn6_predicted	PREDICTED: Rattus norvegicus chloride channel 6 (predicted) (Clcn6_predicted), mRNA [XM_227870]	XM_227870	FALSE
A_44_P839551	0.0461381	0.00610612	-0.084767	0.111353	0.373556	0.548646	0.623555	TC637713	TC637713	HSU31882 ubiquitin-conjugating enzyme 9 (UBC9) {Homo sapiens} (exp=-1; wgp=0; cg=0), partial (32%) [TC637713]		FALSE
A_44_P229376	0.00253917	1.05664e-05	-0.440642	0.00902408	0.448232	1.0714	2.66788	NM_001006958	Sdad1	Rattus norvegicus SDA1 domain containing 1 (Sdad1), mRNA [NM_001006958]	NM_001006958	FALSE
A_44_P591772	0.0217354	0.00159486	-0.0396385	-0.176381	-0.0256146	0.102589	1.03494	DV718643	DV718643	RVL9257 Wackym-Soares normalized rat vestibular cDNA library Rattus norvegicus cDNA 5', mRNA sequence [DV718643]	DV718643	FALSE
A_44_P194939	0.0307936	0.00298914	1.33953	0.35893	-0.783289	-0.151816	1.36537	BF548548	BF548548	UI-R-A0-at-g-04-0-UI.r1 UI-R-A0 Rattus norvegicus cDNA clone UI-R-A0-at-g-04-0-UI 5', mRNA sequence [BF548548]	BF548548	FALSE
A_44_P773287	0.0261855	0.0022414	0.2564	-0.130634	0.161992	0.352935	0.634873	AI454908	AI454908	AI454908 UI-R-C2p-ql-a-09-0-UI.s1 UI-R-C2p Rattus norvegicus cDNA clone UI-R-C2p-ql-a-09-0-UI 3', mRNA sequence [AI454908]	AI454908	FALSE
A_44_P231357	0.0110242	0.000415386	0.280027	0.59589	0.917844	1.00846	1.11963	NM_001002798	Top1mt	Rattus norvegicus DNA topoisomerase I, mitochondrial (Top1mt), mRNA [NM_001002798]	NM_001002798	FALSE
A_44_P390995	0.00304726	2.32445e-05	0.00353855	-0.0874516	0.268955	1.31066	1.84746	NM_013044	Tmod1	Rattus norvegicus tropomodulin 1 (Tmod1), mRNA [NM_013044]	NM_013044	FALSE
A_44_P499171	0.00222533	5.04252e-06	-0.0483899	0.163827	-0.222102	-0.971768	-1.99851	ENSRNOT00000015625	Mtmr7_predicted	PREDICTED: Rattus norvegicus myotubularin related protein 7 (predicted) (Mtmr7_predicted), mRNA [XM_240417]		FALSE
A_44_P365879	0.0229148	0.00175932	-0.439815	-0.0598149	0.10613	0.31145	0.701998	XM_230467	XM_230467	Rattus norvegicus similar to hypothetical protein FLJ10579 (LOC311328), mRNA [XM_230467]	XM_230467	FALSE
A_44_P223899	0.0299605	0.00283153	-0.667552	-0.390092	-0.192245	-0.022898	0.472686	AW143174	AW143174	AW143174 EST293470 Normalized rat brain, Bento Soares Rattus sp. cDNA clone RGIBE94 5' end, mRNA sequence [AW143174]	AW143174	FALSE
A_44_P869241	0.00530977	8.64678e-05	0.41974	1.13495	1.21298	0.566986	-2.60807	TC596214	TC596214			FALSE
A_44_P652890	0.0373673	0.00416907	-0.37698	0.0484508	0.253372	0.478262	0.444977	NM_001033903	MGC124653	Rattus norvegicus similar to Ribulose-5-phosphate-3-epimerase (MGC124653), mRNA [NM_001033903]	NM_001033903	FALSE
A_44_P925674	0.0163386	0.000941727	0.166473	0.179168	0.345457	0.733325	1.98003	AW917673	AW917673	AW917673 EST348977 Rat gene index, normalized rat, norvegicus, Bento Soares Rattus norvegicus cDNA clone RGIEG68 5' end, mRNA sequence [AW917673]	AW917673	FALSE
A_44_P344267	0.0169302	0.00101099	0.0180749	0.281269	0.446914	0.728587	1.25777	NM_001004217	Katna1	Rattus norvegicus katanin p60 (ATPase-containing) subunit A1 (Katna1), mRNA [NM_001004217]	NM_001004217	FALSE
A_44_P517686	0.0122446	0.000523396	-0.515988	-0.124264	0.30009	0.594053	0.821891	NM_212519	Tomm70a	Rattus norvegicus translocase of outer mitochondrial membrane 70 homolog A (yeast) (Tomm70a), mRNA [NM_212519]	NM_212519	FALSE
A_44_P340498	0.0049178	7.12744e-05	0.17233	-0.195225	0.612999	0.927547	1.5842	XM_213445	RGD1559720_predicted	PREDICTED: Rattus norvegicus RGD1559720 (predicted) (RGD1559720_predicted), mRNA [XM_213445]	XM_213445	FALSE
A_44_P311945	0.0111457	0.000433003	0.086392	0.0715741	0.195061	0.358444	0.868123	ENSRNOT00000013471	RGD1310351_predicted	PREDICTED: Rattus norvegicus similar to RIKEN cDNA 4732418C07 (predicted) (RGD1310351_predicted), mRNA [XM_216499]		FALSE
A_44_P277340	0.0418239	0.00511164	-0.128925	-0.312331	0.0562177	0.262199	0.647545	XM_233047	Egfl5_predicted	PREDICTED: Rattus norvegicus EGF-like-domain, multiple 5 (predicted) (Egfl5_predicted), mRNA [XM_233047]	XM_233047	FALSE
A_44_P370500	0.0285563	0.00260586	-1.03875	-0.409471	-0.180912	0.0067904	0.195265	NM_001013101	Moap1	Rattus norvegicus modulator of apoptosis 1 (Moap1), mRNA [NM_001013101]	NM_001013101	FALSE
A_44_P418163	0.00864364	0.000248622	0.198186	0.0538951	0.444646	0.73782	0.946916	NM_198744	Tpd52l2	Rattus norvegicus tumor protein D52-like 2 (Tpd52l2), mRNA [NM_198744]	NM_198744	FALSE
A_44_P310471	0.0460243	0.00608115	0.00934863	0.0116012	0.33546	0.41974	0.668774	NM_031631	Vapa	Rattus norvegicus vesicle-associated membrane protein, associated protein a (Vapa), mRNA [NM_031631]	NM_031631	FALSE
A_42_P794901	0.00936307	0.000299901	-0.248677	-0.016585	0.467625	0.718882	1.19759	NM_013052	Ywhah	Rattus norvegicus tyrosine 3-monooxygenase/tryptophan 5-monooxygenase activation protein, eta polypeptide (Ywhah), mRNA [NM_013052]	NM_013052	FALSE
A_44_P160877	0.00329513	2.84867e-05	-0.14509	0.336519	0.0684131	-0.223757	-1.41858	NM_130409	Cfh	Rattus norvegicus complement component factor H (Cfh), mRNA [NM_130409]	NM_130409	FALSE
A_44_P577773	0.0421352	0.00520254	1.62581	2.08613	1.81837	1.54011	-0.153604	TC604908	TC604908			FALSE
A_44_P257528	0.0311029	0.00304897	-0.415079	-0.169402	0.0834269	0.200946	0.139186	AF053093	LOC287010	AF053093 Rattus norvegicus thiol-specific antioxidant-like protein mRNA, partial cds [AF053093]	AF053093	FALSE
A_44_P135896	0.0079837	0.000211777	0.280028	0.060866	0.328258	0.433491	1.12202	DV714522	DV714522	RVL3900 Wackym-Soares normalized rat vestibular cDNA library Rattus norvegicus cDNA 5', mRNA sequence [DV714522]	DV714522	FALSE
A_44_P137978	0.0309443	0.00302524	-0.197101	-0.243121	0.149364	0.352812	0.629178	ENSRNOT00000017291	ENSRNOT00000017291	PREDICTED: Rattus norvegicus similar to Retinoblastoma-binding protein 8 (RBBP-8) (CtBP interacting protein) (CtIP) (Retinoblastoma-interacting protein and myosin-like) (RIM) (predicted) (RGD1308872_predicted), mRNA [XM_214620]		FALSE
A_44_P340316	0.0122712	0.000525844	-0.668532	-2.96831e-05	0.35547	0.602062	0.473243	NM_001008318	RGD1311578	Rattus norvegicus similar to PRO1853 homolog (RGD1311578), mRNA [NM_001008318]	NM_001008318	FALSE
A_44_P266946	0.0351412	0.00371385	0.0189733	0.137127	0.428199	0.520835	0.5289	NM_001007598	Rpl9	Rattus norvegicus ribosomal protein L9 (Rpl9), mRNA [NM_001007598]	NM_001007598	FALSE
A_42_P547027	0.0187517	0.00123269	-0.240086	0.0606293	0.216529	0.368135	0.264518	NM_001004218	Fuca2	Rattus norvegicus fucosidase, alpha-L- 2, plasma (Fuca2), mRNA [NM_001004218]	NM_001004218	FALSE
A_42_P552187	0.0253674	0.00209421	-0.00334919	-0.0900611	0.335286	0.459955	0.738186	NM_133398	Mtdh	Rattus norvegicus metadherin (Mtdh), mRNA [NM_133398]	NM_133398	FALSE
A_44_P375148	0.0279431	0.00250329	0.0640368	0.0141616	0.356642	0.428169	0.616159	ENSRNOT00000047113	ENSRNOT00000047113			FALSE
A_44_P139697	0.00284077	1.97124e-05	0.339344	0.213639	0.467714	-0.311479	-2.50268	NM_012508	Atp2b2	Rattus norvegicus ATPase, Ca++ transporting, plasma membrane 2 (Atp2b2), mRNA [NM_012508]	NM_012508	FALSE
A_43_P15057	0.0403276	0.00477429	-0.217996	1.69454	1.48381	1.33285	0.717625	TC592273	TC592273			FALSE
A_44_P391068	0.0168533	0.001001	-1.64015	-2.04624	0.172029	0.89035	2.69986	NM_020540	Gstm4	Rattus norvegicus glutathione S-transferase M4 (Gstm4), mRNA [NM_020540]	NM_020540	FALSE
A_44_P499377	0.00703703	0.000155844	0.0580562	0.402334	0.586694	0.736436	1.00347	ENSRNOT00000031852	RGD1309148_predicted	PREDICTED: Rattus norvegicus similar to RIKEN cDNA 3110001D03 (predicted) (RGD1309148_predicted), mRNA [XM_216433]		FALSE
A_44_P393929	0.0443828	0.00567781	-0.0998343	-0.0883401	-0.179043	-0.257819	-1.20847	NM_001039713	RGD1305121_predicted	Rattus norvegicus similar to FTO (predicted) (RGD1305121_predicted), mRNA [NM_001039713]	NM_001039713	FALSE
A_42_P699937	0.0382189	0.00433401	-0.0935469	0.0756915	0.46882	0.530181	0.739497	NM_001034134	Eif3s6ip	Rattus norvegicus eukaryotic translation initiation factor 3, subunit 6 interacting protein (Eif3s6ip), mRNA [NM_001034134]	NM_001034134	FALSE
A_44_P511184	0.0474199	0.00636938	0.471303	0.964204	1.02263	1.25632	1.6207	XM_342143	RGD1560358_predicted	PREDICTED: Rattus norvegicus similar to cell division cycle and apoptosis regulator 1 (predicted) (RGD1560358_predicted), mRNA [XM_342143]	XM_342143	FALSE
A_43_P17945	0.00509527	7.88029e-05	1.06798	0.91043	0.719068	0.428334	-0.14735	NM_001014006	F12	Rattus norvegicus coagulation factor XII (Hageman factor) (F12), mRNA [NM_001014006]	NM_001014006	FALSE
A_44_P714847	0.0488337	0.00668697	0.417663	0.783602	1.19767	1.22225	1.21226	TC587566	TC587566	Q85HP6_9BILA (Q85HP6) NADH dehydrogenase subunit 5, partial (3%) [TC607298]		FALSE
A_44_P387680	0.0453534	0.00589819	-0.641365	-0.491474	-0.355026	-0.262103	0.40901	BC098052	BC098052	Rattus norvegicus cDNA clone IMAGE:7457557 [BC098052]	BC098052	FALSE
A_44_P637281	0.0108079	0.000402003	-0.0887685	0.388508	0.653138	1.00463	1.55068	TC592282	TC592282	Q7TQ12_RAT (Q7TQ12) Aa1114, partial (9%) [TC592282]		FALSE
A_44_P379751	0.00151364	1.68212e-06	-0.140973	-0.308556	-0.579655	-1.33561	-2.21123	ENSRNOT00000001932	ENSRNOT00000001932	Homeobox protein cut-like 1 (CCAAT displacement protein) (CDP) (CDP2) (Fragment). [Source:Uniprot/SWISSPROT;Acc:P53565] [ENSRNOT00000001932]		FALSE
A_43_P14483	0.0169355	0.00101696	-0.0649055	0.187916	0.49331	0.744806	1.09922	NM_053556	G10	Rattus norvegicus maternal G10 transcript (G10), mRNA [NM_053556]	NM_053556	FALSE
A_44_P867229	0.0419247	0.0051592	0.0603179	0.171995	0.296482	0.391752	0.929303	XM_230616	Btbd3_predicted	PREDICTED: Rattus norvegicus BTB (POZ) domain containing 3 (predicted) (Btbd3_predicted), mRNA [XM_230616]	XM_230616	FALSE
A_44_P999630	0.0169355	0.00102125	-0.0150899	-0.173152	0.0455517	0.347666	0.851326	NM_001024744	Cdc16	Rattus norvegicus CDC16 cell division cycle 16 homolog (S. cerevisiae) (Cdc16), mRNA [NM_001024744]	NM_001024744	FALSE
A_44_P992592	0.0370724	0.00410905	0.0940086	-0.0426472	0.457868	0.587039	0.763845	NM_145781	Timm13	Rattus norvegicus translocase of inner mitochondrial membrane 13 homolog (yeast) (Timm13), mRNA [NM_145781]	NM_145781	FALSE
A_44_P525392	0.0123919	0.000534984	-0.308607	0.00865758	0.297392	0.518219	1.16768	ENSRNOT00000014832	Nup205_predicted	PREDICTED: Rattus norvegicus nucleoporin 205kDa (predicted) (Nup205_predicted), mRNA [XM_342657]		FALSE
A_44_P667364	0.019767	0.00135206	-0.221777	0.691751	1.03307	1.47331	1.32448	ENSRNOT00000039319	ENSRNOT00000039319	similar to peptidylprolyl isomerase D (LOC364127), mRNA [Source:RefSeq_dna;Acc:XR_006652] [ENSRNOT00000039319]		FALSE
A_44_P382114	0.0306875	0.00295745	-0.635921	-0.588993	-0.287873	-0.00635469	0.663704	A_44_P382114	A_44_P382114			FALSE
A_44_P877059	0.0443828	0.00568168	-0.356509	-0.187995	-0.105041	0.292106	1.23331	ENSRNOT00000012606	RGD1305754_predicted	PREDICTED: Rattus norvegicus similar to 3110080A02Rik protein (predicted) (RGD1305754_predicted), mRNA [XM_230830]		FALSE
A_44_P387213	0.0118035	0.000489828	-0.51535	-0.572755	0.0530461	0.100003	0.419463	XM_213072	XM_213072	Rattus norvegicus similar to poly(A) binding protein, cytoplasmic 1 (LOC299184), mRNA [XM_213072]	XM_213072	FALSE
A_44_P551275	0.0395472	0.00460316	0.357584	0.799826	0.99168	1.21345	1.54091	ENSRNOT00000059624	ENSRNOT00000059624	Eif5b protein (Fragment). [Source:Uniprot/SPTREMBL;Acc:Q4FZQ8] [ENSRNOT00000059624]		FALSE
A_44_P776786	0.0127669	0.000577061	0.0409294	-0.16424	0.12811	0.21532	0.907596	TC584217	TC584217	Q8T8T3_DROME (Q8T8T3) AT30546p (Fragment), partial (5%) [TC584217]		FALSE
A_44_P1056599	0.0229872	0.00177381	0.233361	0.368459	0.355302	0.140665	-0.673702	XM_213637	XM_213637	Rattus norvegicus similar to Nit protein 2 (LOC288174), mRNA [XM_213637]	XM_213637	FALSE
A_44_P269230	0.00697144	0.000153276	-0.0782601	-0.175716	0.0260088	0.32372	1.25564	NM_001004283	Eif3s7	Rattus norvegicus eukaryotic translation initiation factor 3, subunit 7 (zeta) (Eif3s7), mRNA [NM_001004283]	NM_001004283	FALSE
A_44_P470980	0.013198	0.000624564	0.144254	0.997869	1.1161	1.33562	1.50141	NM_001014037	RGD1306227	Rattus norvegicus similar to 4833420G17Rik protein (RGD1306227), mRNA [NM_001014037]	NM_001014037	FALSE
A_44_P489782	0.0259156	0.00217779	-0.0983531	0.612114	1.34067	1.54051	2.09187	XM_212905	XM_212905	Rattus norvegicus similar to Nucleophosmin (NPM) (Nucleolar phosphoprotein B23) (Numatrin) (Nucleolar protein NO38) (LOC294086), mRNA [XM_212905]	XM_212905	FALSE
A_44_P443349	0.00934998	0.000298377	-0.227879	0.566701	1.11767	1.43587	1.76219	NM_001014062	RGD1306195	Rattus norvegicus similar to RAN protein (RGD1306195), mRNA [NM_001014062]	NM_001014062	FALSE
A_42_P630710	0.0117422	0.000481593	0.409079	0.67885	0.867538	1.07974	1.4729	NM_001004254	Mtif2	Rattus norvegicus mitochondrial translational initiation factor 2 (Mtif2), mRNA [NM_001004254]	NM_001004254	FALSE
A_44_P1059556	0.0130803	0.000614217	0.47433	0.239176	0.0135853	-0.102479	-0.577824	NM_175837	Cyp4a22	Rattus norvegicus cytochrome P450, family 4, subfamily A, polypeptide 22 (Cyp4a22), mRNA [NM_175837]	NM_175837	FALSE
A_44_P505992	0.0452589	0.00587543	-0.175731	0.29307	0.404478	0.51401	0.701445	NM_057131	Prpsap2	Rattus norvegicus phosphoribosyl pyrophosphate synthetase-associated protein 2 (Prpsap2), mRNA [NM_057131]	NM_057131	FALSE
A_44_P411097	0.0446951	0.00575772	0.616231	0.0116131	0.289364	0.00118947	-0.83119	NM_012738	Apoa1	Rattus norvegicus apolipoprotein A-I (Apoa1), mRNA [NM_012738]	NM_012738	FALSE
A_44_P1002320	0.0487752	0.00667116	0.422407	0.91101	0.924318	0.620656	-0.0202644	BF289377	BF289377	BF289377 EST453968 Rat Gene Index, normalized rat, Rattus norvegicus cDNA Rattus norvegicus cDNA clone RGIHE69, mRNA sequence [BF289377]	BF289377	FALSE
A_44_P1019326	0.00317677	2.62767e-05	0.00895596	-0.288381	0.320279	0.619198	1.28531	NM_199372	Eif4a1	Rattus norvegicus eukaryotic translation initiation factor 4A1 (Eif4a1), mRNA [NM_199372]	NM_199372	FALSE
A_42_P624251	0.0290574	0.00268881	-0.124381	0.208897	0.284601	0.391195	1.07887	NM_001033068	LOC361399	Rattus norvegicus similar to autoantigen (LOC361399), mRNA [NM_001033068]	NM_001033068	FALSE
A_44_P855945	0.0405518	0.00484527	-0.753235	-0.125963	0.14105	0.00720382	0.329874	TC580778	TC580778	Q5XKD8_MOUSE (Q5XKD8) Eif4g2 protein (Fragment), partial (48%) [TC580778]		FALSE
A_44_P1035148	0.0359353	0.00387371	0.60768	-0.0379844	-0.194997	-0.927404	-1.11845	NM_001033066	Ddhd1	Rattus norvegicus DDHD domain containing 1 (Ddhd1), mRNA [NM_001033066]	NM_001033066	FALSE
A_44_P348685	0.0320496	0.00323841	0.170284	0.33155	0.683305	0.710691	0.647888	NM_133313	Atxn10	Rattus norvegicus ataxin 10 (Atxn10), mRNA [NM_133313]	NM_133313	FALSE
A_44_P478074	0.0195357	0.0013255	0.309403	0.0725051	0.18362	0.41501	1.46395	NM_001044228	LOC289740	Rattus norvegicus similar to PES1 protein (LOC289740), mRNA [NM_001044228]	NM_001044228	FALSE
A_44_P700241	0.022929	0.00176565	-0.0606855	0.474996	0.726624	0.861479	1.21882	XM_214034	RGD1564808_predicted	PREDICTED: Rattus norvegicus similar to ubiquitin specific protease 46 (predicted) (RGD1564808_predicted), mRNA [XM_214034]	XM_214034	FALSE
A_44_P1006334	0.0375633	0.00420554	-0.0449287	0.392399	0.699792	0.918209	0.750996	NM_017283	Psma6	Rattus norvegicus proteasome (prosome, macropain) subunit, alpha type 6 (Psma6), mRNA [NM_017283]	NM_017283	FALSE
A_44_P164007	0.0440411	0.00560785	-0.226817	0.0225288	0.273219	0.43892	0.652002	ENSRNOT00000008459	RGD1561653_predicted	PREDICTED: Rattus norvegicus similar to HECT domain containing 1 (predicted) (RGD1561653_predicted), mRNA [XM_343060]		FALSE
A_44_P558888	0.0106837	0.000392822	-0.908463	-0.10107	0.0329493	0.388064	0.159858	NM_001005330	Crry	Rattus norvegicus complement receptor related protein (Crry), transcript variant 1, mRNA [NM_001005330]	NM_001005330	FALSE
A_44_P501637	0.0266355	0.0023055	0.20509	0.190004	0.292052	0.153317	-0.644553	NM_001033656	Man1a_predicted	Rattus norvegicus mannosidase 1, alpha (predicted) (Man1a_predicted), mRNA [NM_001033656]	NM_001033656	FALSE
A_43_P14285	0.0111457	0.000432772	0.204576	0.531722	0.836873	1.02745	1.33392	NM_001034145	Statip1	Rattus norvegicus signal transducer and activator of transcription interacting protein 1 (Statip1), mRNA [NM_001034145]	NM_001034145	FALSE
A_44_P384112	0.0432549	0.00541754	-0.442946	-0.124687	-0.0345483	0.263725	0.844468	NM_134367	Ppp3cc	Rattus norvegicus protein phosphatase 3, catalytic subunit, gamma isoform (Ppp3cc), mRNA [NM_134367]	NM_134367	FALSE
A_44_P517258	0.00611631	0.000120113	0.039634	0.523218	0.672923	-0.0854027	-1.68074	NM_198780	Pck1	Rattus norvegicus phosphoenolpyruvate carboxykinase 1 (Pck1), mRNA [NM_198780]	NM_198780	FALSE
A_44_P1053383	0.0427366	0.0053222	-0.247381	-0.0763744	0.240555	0.243447	0.297005	NM_023950	Rab7	Rattus norvegicus RAB7, member RAS oncogene family (Rab7), mRNA [NM_023950]	NM_023950	FALSE
A_44_P185719	0.00749998	0.000177704	-0.11146	-0.0032813	-0.347259	-0.525493	-1.57473	ENSRNOT00000013780	RGD1308772_predicted	PREDICTED: Rattus norvegicus similar to KIAA0564 protein (predicted) (RGD1308772_predicted), mRNA [XR_008855]		FALSE
A_44_P1023093	0.00814469	0.000219482	0.235819	0.677501	0.844861	1.03929	1.50591	NM_207614	LOC362855	Rattus norvegicus P55 (LOC362855), mRNA [NM_207614]	NM_207614	FALSE
A_44_P994599	0.0172235	0.001057	0.329938	0.802468	0.866395	1.04715	1.32805	NM_001004270	Rnut1	Rattus norvegicus RNA, U transporter 1 (Rnut1), mRNA [NM_001004270]	NM_001004270	FALSE
A_44_P244138	0.0124563	0.000545741	-0.401047	-0.448473	-0.0926709	0.145077	0.998547	NM_001013040	Ptpn9	Rattus norvegicus protein tyrosine phosphatase, non-receptor type 9 (Ptpn9), mRNA [NM_001013040]	NM_001013040	FALSE
A_44_P166206	0.0413423	0.00499906	-0.630867	-0.116724	0.174919	0.316213	0.742471	NM_001024260	Nostrin	Rattus norvegicus nitric oxide synthase trafficker (Nostrin), mRNA [NM_001024260]	NM_001024260	FALSE
A_43_P14292	0.0148627	0.000782039	-0.321936	0.087041	0.31392	0.311522	0.272586	XM_340874	Mrps23_predicted	PREDICTED: Rattus norvegicus mitochondrial ribosomal protein S23 (predicted) (Mrps23_predicted), mRNA [XM_340874]	XM_340874	FALSE
A_44_P382372	0.0146255	0.000750477	-0.0259339	0.273742	0.6694	0.887482	1.41943	XR_007808	RGD1560892_predicted	PREDICTED: Rattus norvegicus similar to nuclear autoantigenic sperm protein (predicted) (RGD1560892_predicted), mRNA [XR_007808]	XR_007808	FALSE
A_44_P867809	0.0295426	0.00276095	-0.374664	-0.0634688	0.292371	0.393528	0.472008	A_44_P867809	A_44_P867809			FALSE
A_44_P351898	0.0171673	0.00104988	-0.747664	-0.257129	0.165896	0.326286	0.453914	ENSRNOT00000007285	Mad2l1_predicted	PREDICTED: Rattus norvegicus MAD2 (mitotic arrest deficient, homolog)-like 1 (yeast) (predicted) (Mad2l1_predicted), mRNA [XM_216161]		FALSE
A_42_P837214	0.00772366	0.000193617	-0.213299	0.0917035	0.704026	1.17289	1.34787	NM_012861	Mgmt	Rattus norvegicus O-6-methylguanine-DNA methyltransferase (Mgmt), mRNA [NM_012861]	NM_012861	FALSE
A_42_P521707	0.0422401	0.00522281	-0.900833	0.234213	0.168169	0.555576	0.35178	L23128	RT1-N3	Rattus norvegicus MHC class I mRNA, complete cds. [L23128]	L23128	FALSE
A_44_P484806	0.0169355	0.00101959	-0.133199	0.082774	0.500324	0.637849	0.89403	NM_013073	Pcmt1	Rattus norvegicus protein-L-isoaspartate (D-aspartate) O-methyltransferase 1 (Pcmt1), mRNA [NM_013073]	NM_013073	FALSE
A_43_P12806	0.00466535	5.57681e-05	-0.118427	0.404273	1.00354	1.22064	1.44386	NM_053439	Ran	Rattus norvegicus RAN, member RAS oncogene family (Ran), mRNA [NM_053439]	NM_053439	FALSE
A_42_P536564	0.0317553	0.00318757	0.23806	0.694659	0.85491	0.99183	1.1595	NM_001008344	Etf1	Rattus norvegicus eukaryotic translation termination factor 1 (Etf1), mRNA [NM_001008344]	NM_001008344	FALSE
A_43_P11969	0.0353811	0.0037611	0.0530204	-0.111374	-0.126161	-0.204084	-1.31255	M63574	Sepp1	Rat selenoprotein P mRNA, complete cds [M63574]	M63574	FALSE
A_44_P318846	0.0403949	0.00479204	-0.324888	-0.125047	-0.134592	0.163271	1.45908	ENSRNOT00000016302	Prmt5_predicted	PREDICTED: Rattus norvegicus protein arginine N-methyltransferase 5 (predicted) (Prmt5_predicted), mRNA [XM_344405]		FALSE
A_44_P187685	0.0388852	0.00448635	0.125164	0.430459	0.591267	0.596453	0.716477	ENSRNOT00000044292	Ormdl2_predicted	PREDICTED: Rattus norvegicus ORM1-like 2 (S. cerevisiae) (predicted) (Ormdl2_predicted), mRNA [XM_213832]		FALSE
A_44_P681642	0.0166154	0.000965766	0.0509794	0.508727	0.883021	1.19603	1.66223	CF106938	CF106938	Shultzomica00189 Rat lung airway and parenchyma cDNA libraries Rattus norvegicus cDNA clone Contig3517 5', mRNA sequence [CF106938]	CF106938	FALSE
A_44_P262625	0.0460243	0.00608123	0.0623518	0.0808173	0.62629	0.692813	0.927535	XM_344424	XM_344424	Rattus norvegicus similar to ribosomal protein L6 (LOC364408), mRNA [XM_344424]	XM_344424	FALSE
A_44_P273777	0.00151364	1.70119e-06	0.261276	0.112456	-0.173506	-0.592543	-1.62967	NM_022257	Masp1	Rattus norvegicus mannan-binding lectin serine peptidase 1 (Masp1), mRNA [NM_022257]	NM_022257	FALSE
A_43_P11831	0.0268259	0.00233739	-0.0770259	-0.0337433	-0.00439316	-0.137678	-1.32826	NM_017135	Ak3l1	Rattus norvegicus adenylate kinase 3-like 1 (Ak3l1), mRNA [NM_017135]	NM_017135	FALSE
A_44_P220394	0.0432263	0.00541165	-0.0963664	0.000406265	0.337415	0.491323	0.650497	XM_228526	RGD1560099_predicted	PREDICTED: Rattus norvegicus similar to ribosomal protein L19 (predicted) (RGD1560099_predicted), mRNA [XM_228526]	XM_228526	FALSE
A_44_P1024113	0.0373673	0.00416927	0.100302	-0.0634446	0.344838	0.539924	1.0132	XM_215082	Cd2bp2_predicted	PREDICTED: Rattus norvegicus CD2 antigen (cytoplasmic tail) binding protein 2 (predicted) (Cd2bp2_predicted), mRNA [XM_215082]	XM_215082	FALSE
A_44_P1010500	0.0110242	0.000415639	0.741587	0.213655	0.13292	0.0434458	-0.24717	NM_001011959	Ppgb	Rattus norvegicus protective protein for beta-galactosidase (Ppgb), mRNA [NM_001011959]	NM_001011959	FALSE
A_44_P417055	0.0487467	0.00666465	-0.332523	0.167649	0.434104	0.547397	0.618386	XM_001054022	RGD1566292_predicted	PREDICTED: Rattus norvegicus similar to Chain A, Human Ubiquitin-Conjugating Enzyme Ubc9 (predicted) (RGD1566292_predicted), mRNA [XM_001054022]	XM_001054022	FALSE
A_44_P143541	0.00633533	0.000129824	0.149318	0.139487	0.372233	0.520258	0.824296	NM_001024761	Lrrfip2	Rattus norvegicus leucine rich repeat (in FLII) interacting protein 2 (Lrrfip2), mRNA [NM_001024761]	NM_001024761	FALSE
A_44_P146703	0.00598692	0.000113434	0.177007	0.11705	-0.144771	-0.356904	-1.01253	NM_017030	Pccb	Rattus norvegicus propionyl coenzyme A carboxylase, beta polypeptide (Pccb), mRNA [NM_017030]	NM_017030	FALSE
A_44_P242949	0.0161923	0.000913822	-0.295274	0.0380067	-0.524972	-0.631741	-1.82815	NM_175766	Cyp2j9	Rattus norvegicus cytochrome P450, family 2, subfamily j, polypeptide 9 (Cyp2j9), mRNA [NM_175766]	NM_175766	FALSE
A_44_P288291	0.0273292	0.00241805	-0.545329	-0.45017	0.07044	0.634366	2.18439	NM_001012206	Phlda3	Rattus norvegicus pleckstrin homology-like domain, family A, member 3 (Phlda3), mRNA [NM_001012206]	NM_001012206	FALSE
A_43_P11430	0.00295932	2.1603e-05	-0.314749	-0.422047	0.147676	0.549219	1.23019	ENSRNOT00000025193	Adsl_predicted	PREDICTED: Rattus norvegicus adenylosuccinate lyase (predicted) (Adsl_predicted), mRNA [XM_235496]		FALSE
A_44_P868694	0.0188789	0.00124831	0.0337247	0.412614	0.492865	0.824893	1.72074	TC586851	TC586851	Q7TQ12_RAT (Q7TQ12) Aa1114, partial (12%) [TC586851]		FALSE
A_44_P563313	0.00445197	5.10792e-05	0.47174	0.576611	0.235488	-0.180333	-1.43534	TC634010	TC634010			FALSE
A_44_P140332	0.0202569	0.0014192	-0.668546	-0.366638	0.127045	0.19696	0.419158	NM_001007688	RGD1359600	Rattus norvegicus LEA_4 domain containing protein RGD1359600 (RGD1359600), mRNA [NM_001007688]	NM_001007688	FALSE
A_44_P192382	0.010485	0.000377681	-0.486109	-0.217513	-0.0566879	0.179861	0.834776	NM_001014113	Utp14a	Rattus norvegicus UTP14, U3 small nucleolar ribonucleoprotein, homolog A (yeast) (Utp14a), mRNA [NM_001014113]	NM_001014113	FALSE
A_44_P790861	0.0471205	0.00629145	-0.727979	0.137122	0.415505	0.45882	-0.138177	A_44_P790861	A_44_P790861			FALSE
A_44_P902385	0.0309443	0.00302434	-0.697919	-0.0237878	0.162856	0.151841	0.136304	TC630485	TC630485	Q3TDN1_MOUSE (Q3TDN1) NOD-derived CD11c +ve dendritic cells cDNA, RIKEN full-length enriched library, clone:F630018C04 product:adaptor protein complex AP-1, gamma 1 subunit, full insert sequence, partial (65%) [TC630485]		FALSE
A_42_P540177	0.00253917	9.10722e-06	-0.230262	-0.196341	-0.0967587	0.0700713	0.618715	ENSRNOT00000016692	Dnajc17_predicted	similar to RIKEN cDNA 1700025B16 (predicted) (RGD1560227_predicted), mRNA [Source:RefSeq_dna;Acc:XR_007282] [ENSRNOT00000016692]		FALSE
A_44_P676056	0.0311933	0.00308775	0.525495	0.426972	0.127915	-0.0378627	-1.1724	AW142344	AW142344	AW142344 EST292594 Normalized rat kidney, Bento Soares Rattus sp. cDNA clone RGIAH18 5' end, mRNA sequence [AW142344]	AW142344	FALSE
A_42_P521006	0.0188496	0.00124128	-0.147682	-0.0908399	0.302612	0.444963	0.660147	ENSRNOT00000025574	LOC293589	Putative GTP-binding protein (Fragment). [Source:Uniprot/SPTREMBL;Acc:Q99MM5] [ENSRNOT00000025574]		FALSE
A_42_P494276	0.0126758	0.000569564	0.135724	0.127153	-0.161489	-0.462472	-1.1953	ENSRNOT00000050006	ENSRNOT00000050006	Rattus norvegicus cDNA clone MGC:156700 IMAGE:7099560, complete cds [BC128749]		FALSE
A_44_P1044046	0.00598692	0.000113021	-0.228811	0.12218	0.506728	0.782333	1.03139	ENSRNOT00000006874	Ndufaf1_predicted	PREDICTED: Rattus norvegicus NADH dehydrogenase (ubiquinone) 1 alpha subcomplex, assembly factor 1 (predicted) (Ndufaf1_predicted), mRNA [XM_215814]		FALSE
A_44_P492772	0.015381	0.000831472	0.0465121	-0.126358	0.168684	0.480553	1.52073	ENSRNOT00000027604	RGD1308396_predicted	PREDICTED: Rattus norvegicus similar to chromosome 14 open reading frame 21 (predicted) (RGD1308396_predicted), mRNA [XM_214175]		FALSE
A_44_P205908	0.0105094	0.000379684	-0.131513	0.161427	0.285976	0.440166	1.14333	NM_145780	Psg4	Rattus norvegicus pregnancy specific beta-1-glycoprotein 4 (Psg4), mRNA [NM_145780]	NM_145780	FALSE
A_43_P12519	0.0200713	0.00138707	-0.263307	-0.280589	0.208419	0.656887	1.24638	NM_031114	S100a10	Rattus norvegicus S100 calcium binding protein A10 (calpactin) (S100a10), mRNA [NM_031114]	NM_031114	FALSE
A_44_P761267	0.0161681	0.000909527	0.225534	0.259702	0.591734	0.73207	2.3404	TC597458	TC597458	Q8R4C3_CRIGR (Q8R4C3) Csr1, partial (33%) [TC597458]		FALSE
A_44_P267106	0.0147137	0.000760066	0.0755532	0.0807693	0.497602	0.614014	0.85396	ENSRNOT00000021725	LOC296165	60S ribosomal protein L12. [Source:Uniprot/SWISSPROT;Acc:P23358] [ENSRNOT00000042736]		FALSE
A_44_P929478	0.00151364	1.92604e-06	0.0283804	0.127074	0.397929	0.789106	1.71527	TC624775	TC624775	Q6QI92_RAT (Q6QI92) LRRG00116, partial (30%) [TC624775]		FALSE
A_44_P212927	0.0232748	0.00182582	-0.352744	-0.0421814	0.469691	0.565607	0.654768	XR_007499	RGD1563709_predicted	PREDICTED: Rattus norvegicus similar to K-ALPHA-1 protein (predicted) (RGD1563709_predicted), mRNA [XR_007499]	XR_007499	FALSE
A_44_P268915	0.0351412	0.00371496	-0.607929	-0.2665	-0.792193	-1.1187	-2.62156	BF289003	BF289003	BF289003 EST453594 Rat Gene Index, normalized rat, Rattus norvegicus cDNA Rattus norvegicus cDNA clone RGIHA12 3' sequence, mRNA sequence [BF289003]	BF289003	FALSE
A_44_P189461	0.0312895	0.00310884	0.0319483	-0.21926	-0.360848	-0.558251	-1.28189	ENSRNOT00000035175	ENSRNOT00000035175	Complement component C8 beta chain (Complement component 8 beta subunit) (Fragment). [Source:Uniprot/SWISSPROT;Acc:P55314] [ENSRNOT00000035175]		FALSE
A_44_P1009948	0.0114382	0.000457185	0.565414	0.0259265	0.368536	0.623148	1.11809	ENSRNOT00000004011	RGD1304587	Multiple myeloma tumor-associated protein 2 homolog. [Source:Uniprot/SWISSPROT;Acc:Q5M9I6] [ENSRNOT00000004011]		FALSE
A_44_P996774	0.0228014	0.0017318	-0.0841184	0.165583	0.583138	0.757119	0.736675	NM_001008335	Eif4a2	Rattus norvegicus eukaryotic translation initiation factor 4A2 (Eif4a2), mRNA [NM_001008335]	NM_001008335	FALSE
A_44_P328864	0.017681	0.00111049	-0.230235	-0.110102	0.307634	0.576694	1.50136	ENSRNOT00000038162	ENSRNOT00000038162	PREDICTED: Rattus norvegicus RAN binding protein 1 (predicted) (Ranbp1_predicted), mRNA [XM_341011]		FALSE
A_44_P492587	0.0349569	0.00368615	-0.358365	-0.0100666	0.263081	0.457134	0.705146	ENSRNOT00000035785	ENSRNOT00000035785	Eif5b protein (Fragment). [Source:Uniprot/SPTREMBL;Acc:Q4FZQ8] [ENSRNOT00000035785]		FALSE
A_44_P972824	0.0257831	0.00214442	-0.283642	0.0936804	0.377067	0.704928	1.14493	NM_053655	Dnm1l	Rattus norvegicus dynamin 1-like (Dnm1l), mRNA [NM_053655]	NM_053655	FALSE
A_44_P971386	0.0110673	0.000418738	0.109536	0.315449	0.573072	0.730969	1.1898	XM_574405	LOC499110	PREDICTED: Rattus norvegicus similar to Zinc finger protein 354A (Transcription factor 17) (Renal transcription factor Kid-1) (Kidney, ischemia, and developmentally regulated protein 1) (LOC499110), mRNA [XM_574405]	XM_574405	FALSE
A_43_P21223	0.00985541	0.000331292	-0.900616	-0.270518	-0.34039	0.169304	1.57909	NM_001012014	Ftsj3	Rattus norvegicus FtsJ homolog 3 (E. coli) (Ftsj3), mRNA [NM_001012014]	NM_001012014	FALSE
A_44_P379903	0.0202251	0.00140957	-0.580854	-0.14516	0.141176	0.526742	1.41603	ENSRNOT00000013021	ENSRNOT00000013021	PREDICTED: Rattus norvegicus hypothetical LOC290453 (LOC290453), mRNA [XR_007256]		FALSE
A_44_P104069	0.00550591	9.69608e-05	-0.189892	-0.216593	0.463056	0.707338	1.48581	ENSRNOT00000005688	Nola2_predicted	PREDICTED: Rattus norvegicus nucleolar protein family A, member 2 (predicted) (Nola2_predicted), mRNA [XM_213293]		FALSE
A_44_P838165	0.00901694	0.000273038	0.53596	0.82618	0.0952511	-0.34487	-0.906736	TC594308	TC594308	Q40X79_KINRA (Q40X79) GCN5-related N-acetyltransferase, partial (11%) [TC594308]		FALSE
A_44_P238392	0.0189526	0.00126526	-0.159775	0.134933	0.521825	0.835326	1.16436	NM_001047883	Mrpl49	Rattus norvegicus mitochondrial ribosomal protein L49 (Mrpl49), mRNA [NM_001047883]	NM_001047883	FALSE
A_44_P160550	0.0373673	0.00416867	-0.518612	-0.2595	-0.16301	0.0872685	0.301748	NM_017116	Capn2	Rattus norvegicus calpain 2 (Capn2), mRNA [NM_017116]	NM_017116	FALSE
A_44_P334352	0.00278279	1.60383e-05	0.202502	-0.0687019	0.184359	0.874836	1.57408	ENSRNOT00000001049	Abcf1	ATP-binding cassette sub-family F member 1 (ATP-binding cassette 50). [Source:Uniprot/SWISSPROT;Acc:Q6MG08] [ENSRNOT00000001049]		FALSE
A_44_P267265	0.00304726	2.39045e-05	-0.120711	0.0198613	0.544207	0.835084	0.987037	ENSRNOT00000028598	ENSRNOT00000028598			FALSE
A_44_P434216	0.02729	0.00240438	-0.157672	0.172826	0.297781	-0.0740501	-1.26249	NM_001012193	Rdh11	Rattus norvegicus retinol dehydrogenase 11 (Rdh11), mRNA [NM_001012193]	NM_001012193	FALSE
A_44_P1032161	0.0227618	0.00172727	-0.503038	-0.1313	0.580987	0.696734	0.817028	NM_053677	Chek2	Rattus norvegicus CHK2 checkpoint homolog (S. pombe) (Chek2), mRNA [NM_053677]	NM_053677	FALSE
A_44_P212470	0.00818263	0.000224882	-0.308291	0.252016	0.658368	0.84526	1.05356	ENSRNOT00000022249	RGD1310681_predicted	PREDICTED: Rattus norvegicus similar to RIKEN cDNA 6720467C03 (predicted) (RGD1310681_predicted), mRNA [XM_216357]		FALSE
A_44_P496572	0.00151364	1.93859e-06	-0.0942966	0.148349	-0.477805	-1.15345	-3.01568	NM_021593	Kmo	Rattus norvegicus kynurenine 3-monooxygenase (kynurenine 3-hydroxylase) (Kmo), mRNA [NM_021593]	NM_021593	FALSE
A_44_P137279	0.00853086	0.000241281	0.146281	0.794535	-0.00461519	-1.14786	-4.79584	NM_031027	Dpyd	Rattus norvegicus dihydropyrimidine dehydrogenase (Dpyd), mRNA [NM_031027]	NM_031027	FALSE
A_44_P458281	0.0237567	0.00189532	-0.358919	0.686751	0.578389	0.527121	0.698405	NM_001034154	MGC125002	Rattus norvegicus similar to RIKEN cDNA 5830433M19 (MGC125002), mRNA [NM_001034154]	NM_001034154	FALSE
A_44_P888530	0.0332253	0.00342732	1.71079	1.50012	1.20573	1.30075	-0.885933	TC610181	TC610181			FALSE
A_44_P243081	0.00905369	0.000278671	-0.0914584	0.245749	0.698608	0.906138	0.907719	AB043959	Uchl3	Rattus norvegicus uchl3 mRNA for ubiqutin carboxyl-terminal hydrolase l3, complete cds. [AB043959]	AB043959	FALSE
A_44_P491126	0.0135497	0.000655827	-0.185382	-0.135684	0.247755	0.415664	0.569034	XM_344252	Hbld1_predicted	PREDICTED: Rattus norvegicus HESB like domain containing 1 (predicted) (Hbld1_predicted), mRNA [XM_344252]	XM_344252	FALSE
A_44_P199211	0.0403949	0.00478874	0.0249163	-0.452565	-0.718865	-1.2635	-2.93483	NM_001077641	Plcb1	Rattus norvegicus phospholipase C, beta 1 (Plcb1), mRNA [NM_001077641]	NM_001077641	FALSE
A_44_P182934	0.0323911	0.00331406	-0.014671	0.0970961	0.571498	0.59342	0.69894	NM_021264	Rpl35a	Rattus norvegicus ribosomal protein L35a (Rpl35a), mRNA [NM_021264]	NM_021264	FALSE
A_44_P1025386	0.0406029	0.0048541	0.634115	0.435376	0.407957	0.262184	-0.7392	BF564217	BF564217	BF564217 UI-R-C4-alk-b-02-0-UI.r1 UI-R-C4 Rattus norvegicus cDNA clone UI-R-C4-alk-b-02-0-UI 5', mRNA sequence [BF564217]	BF564217	FALSE
A_43_P19040	0.0480134	0.00650437	-0.273435	0.110037	0.311023	0.492128	0.608961	XM_219796	Ranbp6_predicted	PREDICTED: Rattus norvegicus RAN binding protein 6 (predicted) (Ranbp6_predicted), mRNA [XM_219796]	XM_219796	FALSE
A_44_P133335	0.0395472	0.00460705	1.2309	0.34511	-0.232705	-0.0776423	-0.0293797	XM_001063747	LOC685424	PREDICTED: Rattus norvegicus hypothetical protein LOC685424 (LOC685424), mRNA [XM_001063747]	XM_001063747	FALSE
A_43_P13126	0.0212225	0.00153118	0.0214332	0.341459	0.250581	0.21854	-1.0482	NM_130747	Acot12	Rattus norvegicus acyl-CoA thioesterase 12 (Acot12), mRNA [NM_130747]	NM_130747	FALSE
A_43_P10967	0.0128722	0.000594085	0.341734	0.528739	0.730824	0.955719	1.36359	NM_181823	Rhot2	Rattus norvegicus ras homolog gene family, member T2 (Rhot2), mRNA [NM_181823]	NM_181823	FALSE
A_44_P537250	0.026636	0.00230696	-0.460975	0.137967	0.112531	0.132376	0.363114	CB545242	CB545242	CB545242 AMGNNUC:NRDG1-00096-G11-A nrdg1 (10855) Rattus norvegicus cDNA clone nrdg1-00096-g11 5', mRNA sequence [CB545242]	CB545242	FALSE
A_44_P265058	0.0359081	0.00386503	-0.908864	-0.133791	0.272047	0.359346	0.720646	ENSRNOT00000025389	Gmnn_predicted	PREDICTED: Rattus norvegicus geminin (predicted) (Gmnn_predicted), mRNA [XM_214477]		FALSE
A_44_P552977	0.0237019	0.00187356	-0.301694	0.243533	0.51676	0.758254	0.839264	NM_001007693	Ttc9c	Rattus norvegicus tetratricopeptide repeat domain 9C (Ttc9c), mRNA [NM_001007693]	NM_001007693	FALSE
A_43_P17716	0.0117967	0.000488512	-0.720919	0.183726	0.482282	0.612546	0.478052	CB545120	CB545120	CB545120 AMGNNUC:NRDG1-00187-D5-A nrdg1 (10855) Rattus norvegicus cDNA clone nrdg1-00187-d5 5', mRNA sequence [CB545120]	CB545120	FALSE
A_44_P456599	0.00355932	3.3841e-05	-0.0167809	0.129121	0.855022	1.02545	2.3022	NM_213627	Zdhhc23	Rattus norvegicus zinc finger, DHHC domain containing 23 (Zdhhc23), mRNA [NM_213627]	NM_213627	FALSE
A_43_P16992	0.0237019	0.00187829	-0.238483	0.486613	0.423512	0.187023	-0.628292	ENSRNOT00000015786	Auh_predicted	PREDICTED: Rattus norvegicus AU RNA binding protein [XM_341497]		FALSE
A_44_P306339	0.040835	0.00492037	-0.0915623	0.0321011	-0.0347976	-0.0743723	-0.930719	NM_012511	Atp7b	Rattus norvegicus ATPase, Cu++ transporting, beta polypeptide (Atp7b), mRNA [NM_012511]	NM_012511	FALSE
A_44_P489793	0.0226296	0.00170274	-0.0428838	0.0580735	0.512947	0.658254	0.795169	XR_008496	RGD1559461_predicted	PREDICTED: Rattus norvegicus similar to 40S ribosomal protein S7 (S8) (predicted) (RGD1559461_predicted), mRNA [XR_008496]	XR_008496	FALSE
A_43_P12863	0.0126228	0.000562308	-0.0496522	0.302969	0.663334	0.784343	0.936571	NM_053592	Dut	Rattus norvegicus deoxyuridine triphosphatase (Dut), transcript variant 1, mRNA [NM_053592]	NM_053592	FALSE
A_44_P869053	0.0326443	0.00334996	-0.192734	0.596125	0.355605	0.133647	-0.551247	TC602061	TC602061			FALSE
A_44_P884766	0.000215881	2.85999e-08	-0.198976	-0.0843857	3.08311	4.21043	4.6096	TC583017	TC583017	Q4SVA9_TETNG (Q4SVA9) Chromosome undetermined SCAF13769, whole genome shotgun sequence, partial (4%) [TC583017]		FALSE
A_44_P253380	0.0370363	0.00409516	0.740963	0.76588	0.19703	-0.210254	-1.37757	XM_345920	RGD1563738_predicted	Rattus norvegicus similar to RIKEN cDNA 1700081O22 (LOC367059), mRNA [XM_345920]	XM_345920	FALSE
A_44_P534211	0.041828	0.00511861	-0.502862	-0.00826561	0.363255	0.444655	0.527109	ENSRNOT00000005961	Adss_predicted	Rattus norvegicus similar to ADENYLOSUCCINATE SYNTHETASE, NON-MUSCLE ISOZYME (IMP--ASPARTATE LIGASE) (ADSS) (AMPSASE) (LOC289276), mRNA [XM_222946]		FALSE
A_43_P16629	0.0179475	0.00114931	-0.338754	0.273336	0.525616	0.743035	0.70439	ENSRNOT00000007645	RGD1565002_predicted	PREDICTED: Rattus norvegicus similar to Dehydrogenase [XM_216735]		FALSE
A_42_P710309	0.0259156	0.00218372	0.0851102	0.15841	0.256572	0.389209	1.01392	DV723243	DV723243	RVL14989 Wackym-Soares normalized rat vestibular cDNA library Rattus norvegicus cDNA 5', mRNA sequence [DV723243]	DV723243	FALSE
A_42_P678414	0.0248012	0.00202893	-0.549529	-0.189036	0.518317	0.396937	0.359868	ENSRNOT00000007447	RGD1563106_predicted	PREDICTED: Rattus norvegicus similar to novel protein (predicted) (RGD1563106_predicted), mRNA [XM_220595]		FALSE
A_42_P668972	0.00530977	8.70813e-05	-0.00294232	0.377086	0.814447	1.07743	1.17686	NM_021262	Acp1	Rattus norvegicus acid phosphatase 1, soluble (Acp1), mRNA [NM_021262]	NM_021262	FALSE
A_42_P840460	0.0110996	0.000423513	-0.082509	0.0621465	0.413593	0.540041	0.526051	NM_001008285	Ccdc52	Rattus norvegicus coiled-coil domain containing 52 (Ccdc52), mRNA [NM_001008285]	NM_001008285	FALSE
A_42_P647500	0.00258147	1.24886e-05	-0.204188	-0.0185443	0.165269	0.707487	1.70045	ENSRNOT00000009999	Kif3a	Kinesin-like protein kif3a (Fragment). [Source:Uniprot/SPTREMBL;Acc:Q2P9S3] [ENSRNOT00000009999]		FALSE
A_44_P943696	0.0300778	0.00285663	-0.589862	0.0180053	0.60716	0.285899	0.98543	BF567763	BF567763	BF567763 UI-R-BO0-ahk-h-08-0-UI.r1 UI-R-BO0 Rattus norvegicus cDNA clone UI-R-BO0-ahk-h-08-0-UI 5', mRNA sequence [BF567763]	BF567763	FALSE
A_44_P355861	0.0471205	0.00628993	-0.250574	-0.173722	0.140719	0.399168	0.906346	NM_181475	Cd2ap	Rattus norvegicus CD2-associated protein (Cd2ap), mRNA [NM_181475]	NM_181475	FALSE
A_42_P724142	0.0464436	0.00616638	-0.0133628	0.124226	0.181473	0.268933	1.12021	ENSRNOT00000038511	Mphosph10_predicted	PREDICTED: Rattus norvegicus M-phase phosphoprotein 10 (U3 small nucleolar ribonucleoprotein) (predicted) (Mphosph10_predicted), mRNA [XM_238166]		FALSE
A_44_P478917	0.00481519	6.31739e-05	-0.0405666	0.0986003	0.267849	0.79856	1.77087	XM_214621	Snrpd1_predicted	PREDICTED: Rattus norvegicus small nuclear ribonucleoprotein D1 (predicted) (Snrpd1_predicted), mRNA [XM_214621]	XM_214621	FALSE
A_44_P1015178	0.0163336	0.000936648	0.0393368	0.296395	0.512141	0.794523	1.35143	ENSRNOT00000003667	RGD1562502_predicted	PREDICTED: Rattus norvegicus similar to RIKEN cDNA 2610029G23 (predicted) (RGD1562502_predicted), mRNA [XM_343808]		FALSE
A_44_P236393	0.0398404	0.00465822	-0.351913	-0.257115	-0.188484	0.118914	1.3047	ENSRNOT00000016347	RGD1305605_predicted	PREDICTED: Rattus norvegicus similar to 2610033H07Rik protein (predicted) (RGD1305605_predicted), mRNA [XM_214059]		FALSE
A_44_P365358	0.0371108	0.00411726	0.0956829	0.352974	0.0859233	0.0539436	-0.540894	NM_001004212	Tusc3	Rattus norvegicus tumor suppressor candidate 3 (Tusc3), mRNA [NM_001004212]	NM_001004212	FALSE
A_42_P620591	0.00790266	0.000205801	-0.0378766	0.321516	0.601158	0.727385	0.851387	ENSRNOT00000011499	Arpc3_predicted	PREDICTED: Rattus norvegicus actin related protein 2 [XM_213782]		FALSE
A_44_P535913	0.0183712	0.00119017	0.137355	0.295469	0.136478	0.420376	1.74828	XM_001080751	RGD1309077_predicted	PREDICTED: Rattus norvegicus similar to putative RNA methyltransferase (predicted) (RGD1309077_predicted), mRNA [XM_001080751]	XM_001080751	FALSE
A_44_P166418	0.0174378	0.00108021	0.176535	-0.16547	-0.210856	-0.749135	-1.09735	ENSRNOT00000027564	RGD1310271_predicted	PREDICTED: Rattus norvegicus similar to hypothetical protein MGC45873 (predicted) (RGD1310271_predicted), mRNA [XM_233727]		FALSE
A_44_P821613	0.0339635	0.00352884	0.0264316	-0.0297515	0.341638	0.325993	0.496771	A_44_P821613	A_44_P821613			FALSE
A_44_P466255	0.0226663	0.00171276	-0.710943	-0.247155	-0.0527961	0.236858	1.2866	XM_001074661	LOC690517	PREDICTED: Rattus norvegicus similar to Ornithine decarboxylase (ODC) (LOC690517), mRNA [XM_001074661]	XM_001074661	FALSE
A_44_P106541	0.0124563	0.0005449	-0.396064	0.185209	0.49771	0.583534	0.587302	NM_001025407	Alg5	Rattus norvegicus asparagine-linked glycosylation 5 homolog (yeast, dolichyl-phosphate beta-glucosyltransferase) (Alg5), mRNA [NM_001025407]	NM_001025407	FALSE
A_42_P596503	0.0438873	0.00556984	0.120808	0.351447	0.438178	0.456479	1.06634	NM_053334	Camlg	Rattus norvegicus calcium modulating ligand (Camlg), mRNA [NM_053334]	NM_053334	FALSE
A_44_P222954	0.00639543	0.000132762	-0.425539	-0.0951982	0.681492	0.937403	1.59524	A_44_P222954	A_44_P222954			FALSE
A_44_P121347	0.00136988	9.19741e-07	0.329723	0.167192	-0.733872	-2.03453	-3.61429	NM_001009663	Serpina6	Rattus norvegicus serine (or cysteine) proteinase inhibitor, clade A (alpha-1 antiproteinase, antitrypsin), member 6 (Serpina6), mRNA [NM_001009663]	NM_001009663	FALSE
A_42_P612220	0.0384282	0.00438236	-0.0406303	0.276564	0.458278	0.578274	1.2777	ENSRNOT00000020984	Ddx20	Regulator of steroidogenic factor-1 (Fragment). [Source:Uniprot/SPTREMBL;Acc:Q9JIK3] [ENSRNOT00000020984]		FALSE
A_44_P191593	0.00973138	0.000319377	-0.431943	0.225914	0.131596	0.0431695	-0.922086	NM_053946	Iag2	Rattus norvegicus implantation-associated protein (Iag2), mRNA [NM_053946]	NM_053946	FALSE
A_44_P330170	0.0309443	0.00302304	-0.866253	0.177877	0.290067	0.610063	1.11714	NM_053655	Dnm1l	Rattus norvegicus dynamin 1-like (Dnm1l), mRNA [NM_053655]	NM_053655	FALSE
A_44_P976775	0.0449399	0.00580845	0.117741	0.626271	0.954777	1.05327	1.10728	TC594720	TC594720	Q86YW4_HUMAN (Q86YW4) Ligand-gated ion channel subunit, partial (10%) [TC594720]		FALSE
A_44_P166018	0.00530977	8.52797e-05	-0.234574	-0.42714	0.360127	0.646023	1.43334	ENSRNOT00000055153	ENSRNOT00000055153	similar to nucleolar protein family A, member 2 (LOC365348), mRNA [Source:RefSeq_dna;Acc:XR_009159] [ENSRNOT00000055153]		FALSE
A_44_P900576	0.0259344	0.00218789	0.131579	-0.0242086	0.189717	0.333948	1.00554	TC608395	TC608395	COLI_MOUSE (P01193) Corticotropin-lipotropin precursor (Pro-opiomelanocortin) (POMC) [Contains: NPP; Melanotropin gamma (Gamma-MSH); Corticotropin (Adrenocorticotropic hormone) (ACTH); Melanotropin alpha (Alpha-MSH); Corticotropin-like intermediary...		FALSE
A_44_P253310	0.0206793	0.00146174	0.051632	0.504638	0.715232	0.89407	1.42187	ENSRNOT00000038448	ENSRNOT00000038448	similar to Sfrs7 protein (predicted) (RGD1561463_predicted), mRNA [Source:RefSeq_dna;Acc:XR_009002] [ENSRNOT00000038448]		FALSE
A_44_P792481	0.00284077	1.71215e-05	0.162132	0.335193	0.734994	1.16446	2.08007	XM_001059298	LOC682340	PREDICTED: Rattus norvegicus similar to malignant T cell amplified sequence 1 (LOC682340), mRNA [XM_001059298]	XM_001059298	FALSE
A_44_P406074	0.0316121	0.00316644	0.324273	0.389497	0.208269	-0.616895	-2.23221	NM_022392	Insig1	Rattus norvegicus insulin induced gene 1 (Insig1), mRNA [NM_022392]	NM_022392	FALSE
A_44_P1024739	0.0183712	0.00119001	0.062091	-0.0253488	0.312957	0.539555	0.981858	NM_001007615	Wipi2	Rattus norvegicus WD repeat domain, phosphoinositide interacting 2 (Wipi2), mRNA [NM_001007615]	NM_001007615	FALSE
A_43_P15649	0.0451203	0.00584404	-0.557896	0.0357357	-0.291724	-0.585951	-1.13468	NM_001012345	Dgat2	Rattus norvegicus diacylglycerol O-acyltransferase homolog 2 (mouse) (Dgat2), mRNA [NM_001012345]	NM_001012345	FALSE
A_42_P785075	0.0360792	0.00390613	-0.12836	0.195476	0.372103	0.619245	1.08781	XM_235051	Actr6_predicted	PREDICTED: Rattus norvegicus ARP6 actin-related protein 6 homolog (yeast) (predicted) (Actr6_predicted), mRNA [XM_235051]	XM_235051	FALSE
A_43_P16359	0.0161157	0.000896779	0.314671	-0.0401253	-0.000376701	-0.404845	-1.73745	ENSRNOT00000055987	ENSRNOT00000055987	Ephrin type-A receptor 8 (EC 2.7.10.1) (Tyrosine-protein kinase receptor EEK) (EPH- and ELK-related kinase) (Fragment). [Source:Uniprot/SWISSPROT;Acc:P29321] [ENSRNOT00000055987]		FALSE
A_44_P221056	0.0386043	0.00442511	0.0763685	0.0931231	0.0942724	0.293779	0.731033	NM_032067	Ralbp1	Rattus norvegicus ralA binding protein 1 (Ralbp1), mRNA [NM_032067]	NM_032067	FALSE
A_44_P540067	0.00772366	0.000193347	0.103279	0.111427	0.256257	0.555534	0.975239	NM_152861	Rbm10	Rattus norvegicus RNA binding motif protein 10 (Rbm10), mRNA [NM_152861]	NM_152861	FALSE
A_44_P108217	0.00284077	1.98419e-05	-0.499958	-0.380212	0.459656	0.692917	2.10665	ENSRNOT00000056471	ENSRNOT00000056471	PREDICTED: Rattus norvegicus similar to Epiplakin (LOC680860), mRNA [XM_001059215]		FALSE
A_44_P1008163	0.00530977	8.53244e-05	0.134586	0.0397269	-0.204276	0.398842	1.55889	NM_001039030	Gas8	Rattus norvegicus growth arrest specific 8 (Gas8), mRNA [NM_001039030]	NM_001039030	FALSE
A_43_P15344	0.0486823	0.00663767	-0.00563383	0.550086	0.915832	0.859492	0.543623	NM_053756	Atp5g3	Rattus norvegicus ATP synthase, H+ transporting, mitochondrial F0 complex, subunit c (subunit 9) isoform 3 (Atp5g3), mRNA [NM_053756]	NM_053756	FALSE
A_44_P514899	0.0169748	0.00102815	-0.650682	0.156823	0.00809526	-0.424481	-1.01803	DY311079	DY311079	AGENCOURT_66963306 NIH_MGC_366 Rattus norvegicus cDNA clone IMAGE:8368097 5', mRNA sequence [DY311079]	DY311079	FALSE
A_44_P198716	0.0228014	0.00173271	-0.363256	0.306217	0.446251	0.351436	-0.521981	ENSRNOT00000031907	Pls3	Plastin-3 (T-plastin). [Source:Uniprot/SWISSPROT;Acc:Q63598] [ENSRNOT00000031907]		FALSE
A_44_P1015069	0.00828401	0.000232089	0.203847	-0.225976	-0.281355	-0.853062	-2.60928	NM_001013073	Btbd9	Rattus norvegicus BTB (POZ) domain containing 9 (Btbd9), mRNA [NM_001013073]	NM_001013073	FALSE
A_42_P670901	0.00222533	5.47642e-06	-0.33536	-0.129544	0.265641	0.921765	1.83696	TC597276	TC597276			FALSE
A_44_P405190	0.00898011	0.000269277	1.0032	1.58465	0.545581	0.736829	-1.44291	NM_031732	Sult1c1	Rattus norvegicus sulfotransferase family, cytosolic, 1C, member 1 (Sult1c1), mRNA [NM_031732]	NM_031732	FALSE
A_44_P852338	0.0256929	0.00213338	0.13395	-0.0658462	0.490531	0.511917	1.00366	ENSRNOT00000051343	RGD1563145_predicted	PREDICTED: Rattus norvegicus similar to 60S ribosomal protein L13 (predicted) (RGD1563145_predicted), mRNA [XM_575281]		FALSE
A_44_P203064	0.00797074	0.000210126	-0.180858	0.00541747	0.478025	0.61249	0.933298	ENSRNOT00000029646	LOC682390	similar to Eukaryotic translation initiation factor 3 subunit 2 (eIF-3 beta) (predicted) (RGD1560498_predicted), mRNA [Source:RefSeq_dna;Acc:XR_007776] [ENSRNOT00000029646]		FALSE
A_44_P207634	0.0086592	0.000250918	-0.177471	0.33821	0.559794	0.647005	0.48001	NM_001014148	LOC361309	Rattus norvegicus similar to polyadenylate-binding protein-interacting protein 2 (LOC361309), mRNA [NM_001014148]	NM_001014148	FALSE
A_44_P522063	0.0472615	0.00633298	-0.030374	0.273943	0.507389	0.824105	1.03328	AI102612	AI102612	AI102612 EST211901 Normalized rat embryo, Bento Soares Rattus sp. cDNA clone REMBP94 3' end, mRNA sequence [AI102612]	AI102612	FALSE
A_42_P645352	0.0214292	0.00155525	-0.0526291	0.35706	0.648732	0.90807	0.969893	ENSRNOT00000006412	RGD1309829_predicted	PREDICTED: Rattus norvegicus similar to dJ842G6.1.1 (novel protein) (predicted) (RGD1309829_predicted), mRNA [XM_215857]		FALSE
A_44_P505694	0.00412095	4.40198e-05	-0.262488	0.144659	0.511569	0.685164	1.04989	NM_199401	Cyp20a1	Rattus norvegicus cytochrome P450, family 20, subfamily A, polypeptide 1 (Cyp20a1), mRNA [NM_199401]	NM_199401	FALSE
A_42_P501057	0.00338844	3.00166e-05	0.283417	0.61615	0.370699	-0.0670047	-0.892618	NM_138904	Gls2	Rattus norvegicus glutaminase 2 (liver, mitochondrial) (Gls2), mRNA [NM_138904]	NM_138904	FALSE
A_44_P400591	0.0293415	0.00273858	-0.077289	0.190866	0.907736	1.84828	1.93455	A_44_P400591	A_44_P400591			FALSE
A_44_P245305	0.0281576	0.00253793	-0.281788	0.284054	0.379981	0.359917	-0.221981	NM_199385	Dld	Rattus norvegicus dihydrolipoamide dehydrogenase (Dld), mRNA [NM_199385]	NM_199385	FALSE
A_44_P792746	0.00993845	0.000336591	0.331977	1.11192	0.513952	0.285232	-0.142533	TC602468	TC602468			FALSE
A_44_P696248	0.0151388	0.000808685	0.0735074	0.175819	0.247685	0.270714	1.04053	ENSRNOT00000025036	LOC362012	LOC362012 protein (Fragment). [Source:Uniprot/SPTREMBL;Acc:Q4FZS7] [ENSRNOT00000025036]		FALSE
A_42_P620921	0.0111022	0.000427168	0.271361	0.546107	0.671909	0.886842	1.34023	ENSRNOT00000056518	RGD1562747_predicted	PREDICTED: Rattus norvegicus similar to RIKEN cDNA 1110012L19 (predicted) (RGD1562747_predicted), mRNA [XM_214774]		FALSE
A_44_P975779	0.00867125	0.000252076	-0.064822	-0.08697	-0.174543	-0.537786	-1.42526	DV727686	DV727686	RVL20223 Wackym-Soares normalized rat vestibular cDNA library Rattus norvegicus cDNA 5', mRNA sequence [DV727686]	DV727686	FALSE
A_44_P1004142	0.0361244	0.00391529	0.229961	-0.0449181	0.196792	0.363516	0.88217	ENSRNOT00000019545	RGD1562795_predicted	zinc finger, CCCH-type with G patch domain [Source:RefSeq_peptide;Acc:NP_001009656] [ENSRNOT00000019545]		FALSE
A_44_P148962	0.016935	0.00101348	-0.367357	0.459613	0.243856	0.487494	0.338413	DV722638	DV722638	RVL14275 Wackym-Soares normalized rat vestibular cDNA library Rattus norvegicus cDNA 5', mRNA sequence [DV722638]	DV722638	FALSE
A_43_P17408	0.0142626	0.000714645	-0.158538	-0.364151	-0.57311	-0.902047	-3.11277	CB547962	CB547962	CB547962 AMGNNUC:NRHY3-00187-B5-A W Rat hypothalamus (10735) Rattus norvegicus cDNA clone nrhy3-00187-b5 5', mRNA sequence [CB547962]	CB547962	FALSE
A_44_P309455	0.0225428	0.00169228	0.333562	0.0092603	0.273803	0.445559	1.10096	NM_001008307	RGD1311257	Rattus norvegicus similar to C21orf70 protein (RGD1311257), mRNA [NM_001008307]	NM_001008307	FALSE
A_44_P183087	0.0226502	0.00170792	-0.344389	0.0057019	0.0895773	0.307271	0.565198	NM_001013101	Moap1	Rattus norvegicus modulator of apoptosis 1 (Moap1), mRNA [NM_001013101]	NM_001013101	FALSE
A_43_P17077	0.0108589	0.000407374	-0.0831034	0.318121	0.571986	0.906737	1.21891	ENSRNOT00000023121	RGD1306300_predicted	PREDICTED: Rattus norvegicus similar to CG9643-PA (predicted) (RGD1306300_predicted), mRNA [XM_341945]		FALSE
A_42_P555125	0.0375598	0.0042004	0.165289	0.332704	0.507341	0.663776	0.86628	NM_012913	Atp1b3	Rattus norvegicus ATPase, Na+/K+ transporting, beta 3 polypeptide (Atp1b3), mRNA [NM_012913]	NM_012913	FALSE
A_43_P13216	0.0272928	0.002409	1.09824	-0.399476	-0.261843	-0.161214	0.1729	NM_133572	Cdc25b	Rattus norvegicus cell division cycle 25 homolog B (S. pombe) (Cdc25b), mRNA [NM_133572]	NM_133572	FALSE
A_44_P533959	0.035281	0.00373728	-0.354188	-0.161001	0.301795	0.434291	0.764165	NM_054001	Scarb2	Rattus norvegicus scavenger receptor class B, member 2 (Scarb2), mRNA [NM_054001]	NM_054001	FALSE
A_43_P12635	0.0306882	0.00296254	0.068837	-0.291556	-0.512251	-1.24969	-1.44177	NM_031680	P2ry4	Rattus norvegicus pyrimidinergic receptor P2Y, G-protein coupled, 4 (P2ry4), mRNA [NM_031680]	NM_031680	FALSE
A_44_P268441	0.00839412	0.000236069	-0.281175	0.176255	0.522519	0.699377	0.894627	NM_001025407	Alg5	Rattus norvegicus asparagine-linked glycosylation 5 homolog (yeast, dolichyl-phosphate beta-glucosyltransferase) (Alg5), mRNA [NM_001025407]	NM_001025407	FALSE
A_42_P656217	0.0481744	0.00654889	-0.186437	0.0308474	0.428256	0.590202	0.659778	BC070942	BC070942	Rattus norvegicus hemochromatosis, mRNA (cDNA clone MGC:91432 IMAGE:7099667), complete cds [BC070942]	BC070942	FALSE
A_42_P627572	0.043671	0.00551514	0.0446589	-0.34037	0.19269	0.165297	0.993308	ENSRNOT00000046798	Mdc1	Mediator of DNA damage checkpoint protein 1. [Source:Uniprot/SWISSPROT;Acc:Q5U2M8] [ENSRNOT00000046798]		FALSE
A_44_P212835	0.0378849	0.0042695	0.224054	-0.101641	0.119629	0.244122	0.805527	ENSRNOT00000041929	ENSRNOT00000041929	Histone H2A type 3. [Source:Uniprot/SWISSPROT;Acc:Q4FZT6] [ENSRNOT00000041929]		FALSE
A_44_P1040926	0.0256929	0.00213342	0.249675	0.672086	1.20589	1.69347	1.54274	ENSRNOT00000058351	RGD1562954_predicted	PREDICTED: Rattus norvegicus similar to aldo-keto reductase family 1, member C12 (predicted) (RGD1562954_predicted), mRNA [XM_225544]		FALSE
A_43_P11330	0.00530977	8.7273e-05	0.296445	0.692526	0.513396	0.280118	-1.00934	A_43_P11330	A_43_P11330			FALSE
A_43_P20777	0.0311228	0.00305447	-0.985032	-0.137715	0.357506	0.460019	0.690406	ENSRNOT00000023641	Nsun2_predicted	PREDICTED: Rattus norvegicus NOL1 [XM_341474]		FALSE
A_44_P950537	0.0113242	0.000448399	0.69673	1.03473	1.13677	0.74926	-1.33043	A_44_P950537	A_44_P950537			FALSE
A_44_P447222	0.0125566	0.000552162	0.289522	0.0173914	0.160607	0.345968	0.826761	XM_001076731	LOC687014	PREDICTED: Rattus norvegicus similar to RalA binding protein 1 (LOC687014), mRNA [XM_001076731]	XM_001076731	FALSE
A_43_P13106	0.0079307	0.000207377	0.140049	0.186933	0.373007	0.481104	1.15074	NM_130405	Khdrbs1	Rattus norvegicus KH domain containing, RNA binding, signal transduction associated 1 (Khdrbs1), mRNA [NM_130405]	NM_130405	FALSE
A_42_P529445	0.0455658	0.00595186	0.0961477	0.24983	0.29903	0.528856	0.730049	ENSRNOT00000005504	RGD1308179_predicted	PREDICTED: Rattus norvegicus similar to RIKEN cDNA 2010316F05 (predicted) (RGD1308179_predicted), mRNA [XM_214117]		FALSE
A_44_P1012279	0.0229148	0.00175863	-0.2899	-0.0485523	0.395311	0.600046	1.21642	NM_001030027	RGD1307397	Rattus norvegicus similar to RIKEN cDNA 2810037C03 (RGD1307397), mRNA [NM_001030027]	NM_001030027	FALSE
A_44_P360685	0.0426522	0.0052988	-0.269122	-0.361262	-0.22464	-0.581528	-1.67738	M22360	Mug1	Rat plasma proteinase inhibitor alpha-1-inhibitor III group 3 variants 6J, 12J, 13J, and 17J mRNA, partial cds. [M22360]	M22360	FALSE
A_44_P280759	0.0114461	0.000459159	0.0595124	0.430254	1.07528	1.3476	1.78886	NM_012992	Npm1	Rattus norvegicus nucleophosmin 1 (Npm1), mRNA [NM_012992]	NM_012992	FALSE
A_44_P654271	0.047543	0.00639173	0.376977	0.749497	0.873521	1.02149	1.70069	TC633785	TC633785	Q7TQ12_RAT (Q7TQ12) Aa1114, partial (6%) [TC633785]		FALSE
A_42_P792497	0.040421	0.00481469	0.926159	0.990341	0.77028	0.637017	-0.387805	NM_023025	Cyp2j4	Rattus norvegicus cytochrome P450, family 2, subfamily J, polypeptide 4 (Cyp2j4), mRNA [NM_023025]	NM_023025	FALSE
A_44_P358576	0.0224534	0.00166714	-0.153088	0.057535	0.585126	1.14638	1.42467	A_44_P358576	A_44_P358576			FALSE
A_44_P374988	0.0302822	0.00289264	0.0347315	0.149349	0.279064	0.359494	0.58211	NM_031969	Calm1	Rattus norvegicus calmodulin 1 (Calm1), mRNA [NM_031969]	NM_031969	FALSE
A_43_P17566	0.0455658	0.00595308	0.724815	0.0870697	-0.140665	0.0519822	0.0310319	ENSRNOT00000026688	ENSRNOT00000026688	glycerophosphodiester phosphodiesterase domain containing 3 (predicted) (Gdpd3_predicted), mRNA [Source:RefSeq_dna;Acc:XR_009334] [ENSRNOT00000026688]		FALSE
A_44_P438758	0.00973064	0.000318833	-0.358944	0.0772394	-0.170117	-0.843249	-2.27434	ENSRNOT00000044152	ENSRNOT00000044152	similar to BC049975 protein (predicted) (RGD1565462_predicted), mRNA [Source:RefSeq_dna;Acc:XR_008461] [ENSRNOT00000044152]		FALSE
A_44_P899064	0.0417916	0.00510269	-0.160642	0.374497	0.373975	0.295866	-0.0852873	TC636231	TC636231	RAB2A_RAT (P05712) Ras-related protein Rab-2A, partial (17%) [TC588281]		FALSE
A_44_P260099	0.00772366	0.000193374	-0.274543	-0.299633	0.299905	0.759522	1.30103	NM_139252	Ppap2c	Rattus norvegicus phosphatidic acid phosphatase type 2c (Ppap2c), mRNA [NM_139252]	NM_139252	FALSE
A_44_P1036170	0.0333041	0.00344205	0.229088	0.0173502	0.104112	0.350299	1.90991	XM_220770	Nle1_predicted	PREDICTED: Rattus norvegicus notchless homolog 1 (Drosophila) (predicted) (Nle1_predicted), mRNA [XM_220770]	XM_220770	FALSE
A_44_P193915	0.0178791	0.00113788	-0.148821	0.100471	0.360107	0.491186	0.854119	NM_153306	Drb1	Rattus norvegicus developmentally regulated RNA-binding protein 1 (Drb1), mRNA [NM_153306]	NM_153306	FALSE
A_43_P12541	0.00647142	0.000135759	0.170422	0.219955	0.48822	0.655388	1.02076	NM_031145	Cib1	Rattus norvegicus calcium and integrin binding 1 (calmyrin) (Cib1), mRNA [NM_031145]	NM_031145	FALSE
A_42_P580733	0.00284077	1.85831e-05	0.120007	0.148909	0.470722	0.656978	0.763643	NM_001006981	Dlst	Rattus norvegicus dihydrolipoamide S-succinyltransferase (E2 component of 2-oxo-glutarate complex) (Dlst), mRNA [NM_001006981]	NM_001006981	FALSE
A_44_P536168	0.0224538	0.00167035	0.329829	0.491158	0.743192	1.0575	1.10214	NM_017271	Nudc	Rattus norvegicus nuclear distribution gene C homolog (Aspergillus) (Nudc), mRNA [NM_017271]	NM_017271	FALSE
A_44_P1044830	0.0417916	0.00509191	-0.360127	0.107723	0.436905	0.493051	0.304059	ENSRNOT00000024452	Lactb_predicted	PREDICTED: Rattus norvegicus lactamase, beta (predicted) (Lactb_predicted), mRNA [XM_217181]		FALSE
A_44_P854615	0.0306185	0.00293907	-0.803118	-0.690953	-0.267008	-0.0360564	0.212054	TC604959	TC604959			FALSE
A_44_P340448	0.0291886	0.00271341	-0.389187	-0.224167	-0.16869	-0.0167576	0.382089	NM_001024790	Usp7	Rattus norvegicus ubiquitin specific protease 7 (herpes virus-associated) (Usp7), mRNA [NM_001024790]	NM_001024790	FALSE
A_44_P793931	0.0461966	0.00612255	-0.0370184	0.13313	0.604258	0.864343	1.32257	TC645304	TC645304	MMETL1A enhancer-trap-locus-1 {Mus musculus} (exp=-1; wgp=0; cg=0), partial (9%) [TC645304]		FALSE
A_44_P432358	0.0128722	0.00059436	-1.32806	-0.710557	0.509113	0.733859	0.828603	NM_057105	Ugt1a6	Rattus norvegicus UDP glycosyltransferase 1 family, polypeptide A6 (Ugt1a6), transcript variant 2, mRNA [NM_057105]	NM_057105	FALSE
A_44_P500653	0.0321029	0.00325672	-0.3408	0.179036	0.400437	0.482381	0.213324	NM_001034999	Nicn1	Rattus norvegicus nicolin 1 (Nicn1), mRNA [NM_001034999]	NM_001034999	FALSE
A_44_P1026969	0.0249572	0.00204569	0.625644	1.02237	0.951501	0.833407	0.189994	NM_001012358	RGD1310870	Rattus norvegicus similar to D7Ertd743e protein (RGD1310870), mRNA [NM_001012358]	NM_001012358	FALSE
A_44_P606810	0.00532679	8.94349e-05	0.175257	0.0424134	0.160136	0.388355	1.52435	TC593084	TC593084	Q52UW0_9BACT (Q52UW0) Formyltransferase/hydrolase complex subunit D (Fragment), partial (7%) [TC593084]		FALSE
A_44_P480267	0.0169214	0.00100866	-0.257002	-0.482484	0.236279	0.482944	2.53637	NM_013079	Asns	Rattus norvegicus asparagine synthetase (Asns), mRNA [NM_013079]	NM_013079	FALSE
A_43_P17127	0.00226807	5.80967e-06	0.179532	0.0594738	-0.486405	-1.11813	-2.50074	XM_221100	Abca8a_predicted	PREDICTED: Rattus norvegicus ATP-binding cassette, sub-family A (ABC1), member 8a (predicted) (Abca8a_predicted), mRNA [XM_221100]	XM_221100	FALSE
A_44_P473217	0.00532679	8.84429e-05	0.0250566	0.0627621	0.240886	0.654208	1.61465	NM_001014131	RGD1309708	Rattus norvegicus similar to RIKEN cDNA 4930455F23 (RGD1309708), mRNA [NM_001014131]	NM_001014131	FALSE
A_43_P17161	0.0381997	0.0043244	0.0512574	0.332049	0.434274	0.536019	1.06187	NM_001008314	Mkrn2	Rattus norvegicus makorin, ring finger protein, 2 (Mkrn2), mRNA [NM_001008314]	NM_001008314	FALSE
A_42_P815235	0.0123919	0.000534808	0.296136	1.02781	1.05392	1.16128	1.40844	ENSRNOT00000017347	RGD1306157_predicted	PREDICTED: Rattus norvegicus similar to CG9882-PA (predicted) (RGD1306157_predicted), mRNA [XM_214662]		FALSE
A_44_P773951	0.0160457	0.000890957	0.0918553	0.262046	0.405993	0.466283	0.946694	XR_008964	RGD1561319_predicted	PREDICTED: Rattus norvegicus similar to Pol(yrC)-binding protein 1 (Alpha-CP1) (hnRNP-E1) (predicted) (RGD1561319_predicted), mRNA [XR_008964]	XR_008964	FALSE
A_43_P19328	0.00872622	0.000257415	-0.439905	-0.0123564	0.39065	0.539811	0.724215	ENSRNOT00000004002	ENSRNOT00000004002	Rattus norvegicus similar to RIKEN cDNA 2810460C24 (LOC287389), mRNA [XM_213316]		FALSE
A_44_P575890	0.0479332	0.00647655	-0.271896	0.0285133	0.16193	0.640236	0.744425	TC602730	TC602730	Q7TQ12_RAT (Q7TQ12) Aa1114, partial (9%) [TC602730]		FALSE
A_43_P11505	0.00427897	4.70392e-05	0.667487	0.417543	0.33501	-0.111819	-1.20871	NM_012657	Serpina3k	Rattus norvegicus serine (or cysteine) peptidase inhibitor, clade A, member 3K (Serpina3k), mRNA [NM_012657]	NM_012657	FALSE
A_44_P537103	0.00598692	0.000111834	-0.351195	-0.160455	0.526604	0.950047	1.80342	XM_001061020	LOC681314	PREDICTED: Rattus norvegicus similar to BAX protein, cytoplasmic isoform delta, transcript variant 2 (LOC681314), mRNA [XM_001061020]	XM_001061020	FALSE
A_43_P13317	0.0230956	0.00178588	0.223245	-0.334327	-0.271169	-0.538634	-1.23283	NM_138877	Cyb5r3	Rattus norvegicus cytochrome b5 reductase 3 (Cyb5r3), mRNA [NM_138877]	NM_138877	FALSE
A_44_P1028017	0.027512	0.00243805	-0.0943252	0.479145	0.639984	0.774942	0.679743	NM_019907	Cript	Rattus norvegicus postsynaptic protein Cript (Cript), mRNA [NM_019907]	NM_019907	FALSE
A_44_P138098	0.0292083	0.0027168	0.553179	0.763766	0.769223	0.567444	-0.372114	XR_008599	RGD1564981_predicted	PREDICTED: Rattus norvegicus similar to Nonspecific lipid-transfer protein, mitochondrial precursor (NSL-TP) (predicted) (RGD1564981_predicted), mRNA [XR_008599]	XR_008599	FALSE
A_44_P328292	0.0408433	0.00493443	-0.216987	-0.431309	0.0509883	0.316762	0.65583	XM_341158	XM_341158	Rattus norvegicus similar to put. type 5 nonmuscle actin (LOC360883), mRNA [XM_341158]	XM_341158	FALSE
A_44_P206434	0.00872622	0.000255521	-0.0146083	0.599523	0.830214	1.11472	2.02597	XM_216850	RGD1563803_predicted	Rattus norvegicus similar to Lmnb2 protein (LOC299625), mRNA [XM_216850]	XM_216850	FALSE
A_44_P931341	0.0242733	0.00196632	-0.00671768	0.142005	-0.0238754	0.211378	1.9769	TC632873	TC632873			FALSE
A_42_P607061	0.0433391	0.00544524	0.0620185	0.213518	0.248517	0.418896	1.09245	NM_001008292	Diablo	Rattus norvegicus diablo homolog (Drosophila) (Diablo), mRNA [NM_001008292]	NM_001008292	FALSE
A_42_P541857	0.00598692	0.000113738	0.124987	0.00391448	0.226996	0.437035	0.923966	ENSRNOT00000023303	Cab39_predicted	PREDICTED: Rattus norvegicus calcium binding protein 39 (predicted) (Cab39_predicted), mRNA [XM_217464]		FALSE
A_44_P276220	0.0102742	0.000366169	-0.0765857	0.306239	0.604665	0.832302	1.17675	NM_031042	Gtf2f2	Rattus norvegicus general transcription factor IIF, polypeptide 2 (Gtf2f2), mRNA [NM_031042]	NM_031042	FALSE
A_42_P692306	0.00921992	0.000290798	0.0706573	-0.0742336	0.263236	0.544623	1.52294	NM_001008277	Tbl3	Rattus norvegicus transducin (beta)-like 3 (Tbl3), mRNA [NM_001008277]	NM_001008277	FALSE
A_44_P1018749	0.0243503	0.00197776	-0.18115	0.319582	0.222359	0.135572	-0.636182	BF290252	BF290252	BF290252 EST454843 Rat Gene Index, normalized rat, Rattus norvegicus cDNA Rattus norvegicus cDNA clone RGIHU35 5' sequence, mRNA sequence [BF290252]	BF290252	FALSE
A_43_P21776	0.0498021	0.00688868	-0.282203	0.265591	0.606238	0.488105	0.987594	ENSRNOT00000001498	Rfc5_predicted	PREDICTED: Rattus norvegicus replication factor C (activator 1) 5 (predicted) (Rfc5_predicted), mRNA [XM_222214]		FALSE
A_44_P367513	0.0344677	0.00359043	-0.0251213	-0.284784	-0.468822	-0.755892	-2.03863	NM_173093	Cyp2d13	Rattus norvegicus cytochrome P450, family 2, subfamily d, polypeptide 13 (Cyp2d13), mRNA [NM_173093]	NM_173093	FALSE
A_44_P1050054	0.028324	0.00257408	0.138525	0.644298	0.288058	0.01613	-1.29879	NM_022268	Pygl	Rattus norvegicus liver glycogen phosphorylase (Pygl), mRNA [NM_022268]	NM_022268	FALSE
A_44_P941132	0.00401764	4.13791e-05	0.0976406	0.602223	0.935302	1.51343	2.14685	ENSRNOT00000030569	Chordc1_predicted	PREDICTED: Rattus norvegicus cysteine and histidine-rich domain (CHORD)-containing, zinc-binding protein 1 (predicted) (Chordc1_predicted), mRNA [XM_235878]		FALSE
A_44_P1022637	0.0210845	0.0015156	0.650749	-0.218559	0.163671	0.401567	0.921476	NM_001029897	Strn3	Rattus norvegicus striatin, calmodulin binding protein 3 (Strn3), mRNA [NM_001029897]	NM_001029897	FALSE
A_44_P1040584	0.00863262	0.000246923	0.156167	0.20046	0.421184	0.649291	1.11323	ENSRNOT00000009483	Med6_predicted	PREDICTED: Rattus norvegicus mediator of RNA polymerase II transcription, subunit 6 homolog (yeast) (predicted) (Med6_predicted), mRNA [XM_216759]		FALSE
A_42_P460785	0.00772366	0.000191503	0.30838	0.826684	0.610377	0.212842	-0.86927	NM_012816	Amacr	Rattus norvegicus alpha-methylacyl-CoA racemase (Amacr), mRNA [NM_012816]	NM_012816	FALSE
A_44_P231448	0.023221	0.00181197	0.268088	0.0570169	-0.592955	0.0190819	-0.789718	ENSRNOT00000000449	ENSRNOT00000000449	Profilaggrin (Fragment). [Source:Uniprot/SPTREMBL;Acc:Q8CIU0] [ENSRNOT00000000449]		FALSE
A_44_P220252	0.00253917	1.11503e-05	-0.116417	0.301057	-0.230301	-0.639295	-2.0853	ENSRNOT00000025534	C5	Complement C5 [Contains: C5a anaphylatoxin] (Fragment). [Source:Uniprot/SWISSPROT;Acc:P08650] [ENSRNOT00000025534]		FALSE
A_44_P367438	0.00451246	5.23104e-05	-0.106833	0.0146607	0.146763	0.261425	0.641727	NM_001015025	Stk38	Rattus norvegicus serine/threonine kinase 38 (Stk38), mRNA [NM_001015025]	NM_001015025	FALSE
A_44_P452062	0.0279431	0.00250431	0.161067	0.130808	0.311895	0.216632	0.928264	NM_001000122	Olr48_predicted	Rattus norvegicus olfactory receptor 48 (predicted) (Olr48_predicted), mRNA [NM_001000122]	NM_001000122	FALSE
A_43_P15557	0.00481519	6.35678e-05	-0.57427	0.106121	1.09352	1.36439	2.41998	NM_022224	Pter	Rattus norvegicus phosphotriesterase related (Pter), mRNA [NM_022224]	NM_022224	FALSE
A_44_P1058222	0.0099617	0.000338189	0.172516	0.277544	0.714309	0.84433	1.07686	NM_001037767	Arpc5l	Rattus norvegicus actin related protein 2/3 complex, subunit 5-like (Arpc5l), mRNA [NM_001037767]	NM_001037767	FALSE
A_44_P319208	0.0471458	0.00629735	-0.530057	-0.379626	-0.00736052	0.172384	0.0806498	ENSRNOT00000025873	Dpp8_predicted	PREDICTED: Rattus norvegicus dipeptidylpeptidase 8 (predicted) (Dpp8_predicted), mRNA [XM_236345]		FALSE
A_44_P442284	0.0236997	0.00186927	-0.343748	0.687301	0.371353	0.553148	0.735673	AI600035	AI600035	AI600035 EST251738 Normalized rat embryo, Bento Soares Rattus sp. cDNA clone REMDO69 3' end, mRNA sequence [AI600035]	AI600035	FALSE
A_42_P697274	0.00543724	9.4591e-05	0.0789496	-0.222229	1.20745	1.66387	1.48577	AW920707	AW920707	AW920707 EST352011 Rat gene index, normalized rat, norvegicus, Bento Soares Rattus norvegicus cDNA clone RGIHB33 5' end, mRNA sequence [AW920707]	AW920707	FALSE
A_44_P489512	0.00824456	0.000228255	-0.183603	-0.0709308	0.637844	1.10285	1.92488	AF235993	Bax	Rattus norvegicus Bax protein splice variant k mRNA, complete cds. [AF235993]	AF235993	FALSE
A_44_P836723	0.0338767	0.00351802	-0.0195104	0.0386406	0.433219	0.492922	0.944464	ENSRNOT00000038101	ENSRNOT00000038101	similar to RIKEN cDNA E430018M08 (predicted) (RGD1566300_predicted), mRNA [Source:RefSeq_dna;Acc:XR_007951] [ENSRNOT00000038101]		FALSE
A_44_P374011	0.0291886	0.00271221	-0.79916	-0.491722	-0.171514	0.0279164	0.349761	NM_001017489	LOC498225	Rattus norvegicus similar to ligatin (LOC498225), mRNA [NM_001017489]	NM_001017489	FALSE
A_44_P408313	0.017681	0.00110633	-0.071826	0.085056	0.279138	0.478351	0.738332	AW144303	AW144303	AW144303 EST294599 Normalized rat ovary, Bento Soares Rattus sp. cDNA clone RGICP67 5' end, mRNA sequence [AW144303]	AW144303	FALSE
A_42_P739322	0.0419176	0.00515542	-0.490538	-0.266601	-0.153654	0.056089	0.558827	NM_053347	Nde1	Rattus norvegicus nuclear distribution gene E homolog 1 (A nidulans) (Nde1), mRNA [NM_053347]	NM_053347	FALSE
A_44_P513251	0.00548875	9.59584e-05	-0.721992	0.0312187	0.375796	0.533866	0.548287	XM_001069884	LOC684325	PREDICTED: Rattus norvegicus similar to acid phosphatase 1 isoform b (LOC684325), mRNA [XM_001069884]	XM_001069884	FALSE
A_44_P290559	0.0499965	0.00694871	-0.400561	-0.457464	0.217568	0.140695	0.77591	ENSRNOT00000056592	Pabpc4	Pabpc4 protein (Fragment). [Source:Uniprot/SPTREMBL;Acc:Q5I0G7] [ENSRNOT00000056592]		FALSE
A_44_P307964	0.0384378	0.00438551	0.0953041	0.809132	0.721606	0.923437	1.20299	NM_001014259	Polr3k	Rattus norvegicus polymerase (RNA) III (DNA directed) polypeptide K (Polr3k), mRNA [NM_001014259]	NM_001014259	FALSE
A_44_P976667	0.00576605	0.000105556	-0.500851	0.0317296	0.3475	0.56985	1.42634	TC614474	TC614474			FALSE
A_43_P10604	0.0232207	0.0018067	0.0954266	0.315945	0.569193	0.671924	0.856157	NM_001013933	Ube2a	Rattus norvegicus ubiquitin-conjugating enzyme E2A, RAD6 homolog (S. cerevisiae) (Ube2a), mRNA [NM_001013933]	NM_001013933	FALSE
A_44_P883191	0.0499965	0.00694338	0.438138	-0.0293471	-0.19739	-0.168925	-0.298522	XM_001065777	LOC685924	PREDICTED: Rattus norvegicus hypothetical protein LOC685924 (LOC685924), mRNA [XM_001065777]	XM_001065777	FALSE
A_44_P535311	0.0225237	0.00168516	0.106445	0.143942	0.349246	0.491967	1.22442	ENSRNOT00000055909	ENSRNOT00000055909	PREDICTED: Rattus norvegicus similar to 2210021J22Rik protein (predicted) (RGD1306001_predicted), mRNA [XM_343305]		FALSE
A_44_P114729	0.0363471	0.00395106	-0.298423	0.151573	0.496877	0.559582	1.05983	XM_216543	RGD1308048_predicted	PREDICTED: Rattus norvegicus similar to HT014 (predicted) (RGD1308048_predicted), mRNA [XM_216543]	XM_216543	FALSE
A_44_P974940	0.0265766	0.00229757	1.68942	0.949848	0.387533	0.0553493	-1.00695	ENSRNOT00000061896	RGD1562392_predicted	PREDICTED: Rattus norvegicus similar to Sulfotransferase K1 (rSULT1C2) (predicted) (RGD1562392_predicted), mRNA [XM_346007]		FALSE
A_42_P674598	0.0459644	0.006039	0.695117	1.01268	1.01441	0.868187	0.298099	NM_013067	Rpn1	Rattus norvegicus ribophorin I (Rpn1), mRNA [NM_013067]	NM_013067	FALSE
A_44_P311324	0.0459977	0.00606745	-0.401222	0.226413	0.0938516	0.08866	-0.851911	ENSRNOT00000028196	ENSRNOT00000028196	Cytochrome P450 2B2 (EC 1.14.14.1) (CYPIIB2) (P450E) (P450 PB4). [Source:Uniprot/SWISSPROT;Acc:P04167] [ENSRNOT00000028196]		FALSE
A_44_P308877	0.0378849	0.00427027	0.00855315	-0.0687777	0.229263	0.337896	0.763708	NM_001005244	Dmd	Rattus norvegicus dystrophin, muscular dystrophy (Dmd), transcript variant Dp71ab, mRNA [NM_001005244]	NM_001005244	FALSE
A_43_P19742	0.00419797	4.54767e-05	1.48017	0.831395	0.456374	-0.83364	-2.58647	ENSRNOT00000059326	ENSRNOT00000059326	RIKEN cDNA 1700008G05 gene [Source:MarkerSymbol;Acc:MGI:1922747] [ENSRNOT00000059326]		FALSE
A_44_P315022	0.0153595	0.000828191	0.00154626	0.255649	0.499416	0.757979	1.01875	NM_001025275	Rad23b	Rattus norvegicus RAD23b homolog (S. cerevisiae) (Rad23b), mRNA [NM_001025275]	NM_001025275	FALSE
A_44_P161790	0.00530977	8.63338e-05	-0.510803	-0.00343949	0.112673	0.263795	0.730556	ENSRNOT00000028288	Tmem103_predicted	PREDICTED: Rattus norvegicus transmembrane protein 103 (predicted) (Tmem103_predicted), mRNA [XM_343489]		FALSE
A_42_P585119	0.0168417	0.000999377	0.473833	0.414735	0.824043	1.00977	1.35658	NM_199493	RGD735029	Rattus norvegicus SEL1 domain containing protein RGD735029 (RGD735029), mRNA [NM_199493]	NM_199493	FALSE
A_44_P377432	0.0034568	3.15664e-05	0.465969	-0.186271	-0.455163	-1.41302	-2.60443	ENSRNOT00000039652	RGD1562101_predicted	PREDICTED: Rattus norvegicus similar to very large G-protein coupled receptor 1 (LOC362068), mRNA [XM_001056150]		FALSE
A_44_P484948	0.0439224	0.00558137	-0.135271	0.391667	0.743859	0.623514	0.323947	ENSRNOT00000002167	Atp5g3	ATP synthase lipid-binding protein, mitochondrial precursor (EC 3.6.3.14) (ATP synthase proteolipid P3) (ATPase protein 9) (ATPase subunit C). [Source:Uniprot/SWISSPROT;Acc:Q71S46] [ENSRNOT00000002167]		FALSE
A_44_P459554	0.00304726	2.32548e-05	-0.323607	-0.229923	0.283006	0.473886	1.16776	NM_001014055	RGD1309682	Rattus norvegicus similar to hypothetical protein FLJ14803 (RGD1309682), mRNA [NM_001014055]	NM_001014055	FALSE
A_44_P204173	0.0118035	0.000491649	-0.0545396	0.355987	0.326672	0.63189	1.83171	A_44_P204173	A_44_P204173			FALSE
A_44_P311609	0.0135317	0.000653733	-0.19753	0.418709	0.85694	0.960122	0.975602	ENSRNOT00000024355	Bccip_predicted	Rattus norvegicus similar to RIKEN cDNA 1110013J05 (LOC361666), mRNA [XM_341947]		FALSE
A_44_P442867	0.017681	0.00111167	-0.230854	0.12238	0.42859	0.539048	0.609238	NM_053739	Becn1	Rattus norvegicus beclin 1 (coiled-coil, myosin-like BCL2-interacting protein) (Becn1), transcript variant 1, mRNA [NM_053739]	NM_053739	FALSE
A_43_P11181	0.0132946	0.00063355	0.1524	0.053344	0.377805	0.473091	0.810801	XM_001077170	LOC691193	PREDICTED: Rattus norvegicus similar to elongation factor 1 homolog (ELF1, S. cerevisiae) (LOC691193), mRNA [XM_001077170]	XM_001077170	FALSE
A_44_P222765	0.0331964	0.00342083	-0.336499	-0.210848	0.219925	0.180968	0.509275	XM_342901	XM_342901	Rattus norvegicus similar to ribosomal protein L10a (LOC362582), mRNA [XM_342901]	XM_342901	FALSE
A_44_P234104	0.00528155	8.42726e-05	-0.189904	-0.0369025	0.410354	0.62508	1.01152	A_44_P234104	A_44_P234104			FALSE
A_43_P17528	0.0454211	0.0059152	-0.41964	0.18285	0.368079	0.400082	-0.296915	NM_001008342	Akr1e1	Rattus norvegicus aldo-keto reductase family 1, member E1 (Akr1e1), mRNA [NM_001008342]	NM_001008342	FALSE
A_44_P558607	0.047543	0.00639311	0.351757	-0.213643	0.198303	0.277106	0.81431	NM_001025011	RGD1305464	Rattus norvegicus similar to DKFZP434H132 protein (RGD1305464), mRNA [NM_001025011]	NM_001025011	FALSE
A_43_P11201	0.0162797	0.000927838	-0.248944	0.140675	0.1451	0.277215	0.9822	NM_001017473	MGC112682	Rattus norvegicus similar to RIKEN cDNA 0610039K22 (MGC112682), mRNA [NM_001017473]	NM_001017473	FALSE
A_44_P435822	0.00611631	0.000119376	-0.256558	-0.281414	0.160093	0.359074	1.09222	NM_001047892	LOC317165	Rattus norvegicus similar to Set alpha isoform (LOC317165), mRNA [NM_001047892]	NM_001047892	FALSE
A_44_P637047	0.0129152	0.000598928	-0.0738706	0.427546	1.1242	1.34138	1.80661	A_44_P637047	A_44_P637047			FALSE
A_44_P1047992	0.00321992	2.7321e-05	0.728563	0.747478	0.592578	0.402894	-0.0884154	NM_012803	Proc	Rattus norvegicus protein C (Proc), mRNA [NM_012803]	NM_012803	FALSE
A_44_P549011	0.0352477	0.00373187	1.28552	-0.313882	-0.106648	-0.25664	-0.960711	NM_031780	Apba2	Rattus norvegicus amyloid beta (A4) precursor protein-binding, family A, member 2 (Apba2), mRNA [NM_031780]	NM_031780	FALSE
A_44_P175864	0.0275949	0.00245628	-0.36742	-0.437792	0.0183962	-0.0286057	0.967714	ENSRNOT00000019587	Trit1_predicted	PREDICTED: Rattus norvegicus tRNA isopentenyltransferase 1 (predicted) (Trit1_predicted), mRNA [XM_342905]		FALSE
A_42_P577445	0.0257831	0.0021478	0.218324	0.372089	0.840084	1.03263	1.496	XM_344643	LOC364802	PREDICTED: Rattus norvegicus similar to CG8043-PA (LOC364802), mRNA [XM_344643]	XM_344643	FALSE
A_42_P658562	0.00814469	0.000219979	-0.431122	-0.16504	0.214162	0.344248	0.703175	ENSRNOT00000016980	RGD1304711_predicted	PREDICTED: Rattus norvegicus similar to RIKEN cDNA 4921521J11 (predicted) (RGD1304711_predicted), mRNA [XM_214334]		FALSE
A_43_P11701	0.0358084	0.00385154	-0.0771154	0.3767	0.367994	0.125421	-0.922937	NM_013082	Sdc2	Rattus norvegicus syndecan 2 (Sdc2), mRNA [NM_013082]	NM_013082	FALSE
A_44_P431053	0.00357763	3.45052e-05	0.0371336	0.739507	0.0199199	-1.16902	-5.15616	NM_031027	Dpyd	Rattus norvegicus dihydropyrimidine dehydrogenase (Dpyd), mRNA [NM_031027]	NM_031027	FALSE
A_44_P501827	0.0107241	0.000396596	-0.486821	0.0802604	0.347939	0.46709	1.18495	XM_216893	Cpsf6_predicted	PREDICTED: Rattus norvegicus cleavage and polyadenylation specific factor 6, 68kDa (predicted) (Cpsf6_predicted), mRNA [XM_216893]	XM_216893	FALSE
A_44_P167630	0.0186465	0.00122094	0.726413	0.0217617	0.340502	0.313439	1.39955	AI013756	AI013756	AI013756 EST208431 Normalized rat spleen, Bento Soares Rattus sp. cDNA clone RSPBS46 3' end, mRNA sequence [AI013756]	AI013756	FALSE
A_44_P329389	0.0128107	0.000581094	-0.0174911	0.165465	0.538694	0.774221	1.39211	DY472907	DY472907	RVL24274 Wackym-Soares normalized rat vestibular cDNA library Rattus norvegicus cDNA 5', mRNA sequence [DY472907]	DY472907	FALSE
A_44_P609484	0.0339836	0.00353274	-0.138125	0.389833	0.851792	1.10396	1.15512	TC596298	TC596298			FALSE
A_44_P269930	0.0189082	0.0012567	0.890673	0.677581	0.675591	0.0840144	-1.28548	ENSRNOT00000019080	RGD1310174_predicted	PREDICTED: Rattus norvegicus hypothetical LOC298504 (predicted) (RGD1310174_predicted), mRNA [XM_216525]		FALSE
A_42_P757500	0.00772366	0.000195369	0.0726905	0.486324	0.164952	-0.602677	-1.92044	NM_031046	Itpr2	Rattus norvegicus inositol 1,4,5-triphosphate receptor 2 (Itpr2), mRNA [NM_031046]	NM_031046	FALSE
A_44_P418944	0.0172007	0.00105284	0.275718	0.0273752	0.581251	1.01646	1.23967	NM_199394	Entpd5	Rattus norvegicus ectonucleoside triphosphate diphosphohydrolase 5 (Entpd5), mRNA [NM_199394]	NM_199394	FALSE
A_42_P774878	0.0357618	0.0038399	0.168746	0.303773	0.592122	0.809203	0.911536	NM_053637	Stxbp3	Rattus norvegicus syntaxin binding protein 3 (Stxbp3), mRNA [NM_053637]	NM_053637	FALSE
A_42_P661837	0.0299151	0.00281926	-0.00837654	0.53716	0.61625	0.767608	1.04808	NM_053797	Crnkl1	Rattus norvegicus Crn, crooked neck-like 1 (Drosophila) (Crnkl1), mRNA [NM_053797]	NM_053797	FALSE
A_44_P114843	0.0483705	0.00658483	-0.272425	0.385628	0.328999	0.491813	1.24842	XM_346028	XM_346028	Rattus norvegicus similar to RIKEN cDNA 1110058L19 (LOC367234), mRNA [XM_346028]	XM_346028	FALSE
A_44_P171203	0.00284077	1.94385e-05	0.460751	0.39593	-0.162442	-0.468076	-1.5296	ENSRNOT00000038074	Nubpl_predicted	PREDICTED: Rattus norvegicus nucleotide binding protein-like (predicted) (Nubpl_predicted), mRNA [XM_216689]		FALSE
A_44_P404219	0.0176019	0.00109713	-0.408239	0.43583	0.69013	0.646816	-0.0395126	ENSRNOT00000016100	RGD1566282_predicted	PREDICTED: Rattus norvegicus similar to RIKEN cDNA D330045A20 (predicted) (RGD1566282_predicted), mRNA [XM_236533]		FALSE
A_44_P453278	0.0105891	0.000385386	0.364582	0.0164219	-0.02242	-0.587835	-2.81363	BF561497	BF561497	BF561497 UI-R-C0-ia-c-04-0-UI.r1 UI-R-C0 Rattus norvegicus cDNA clone UI-R-C0-ia-c-04-0-UI 5', mRNA sequence [BF561497]	BF561497	FALSE
A_44_P776188	0.0242864	0.00196868	0.363482	0.733482	1.04131	1.17297	1.34026	TC575970	TC575970	ACTY_MOUSE (Q8R5C5) Beta-centractin (Actin-related protein 1B) (ARP1B), partial (61%) [TC575970]		FALSE
A_43_P23051	0.00601283	0.000114837	-0.296814	0.276983	0.292951	0.199368	-0.586309	NM_001031663	LOC500419	Rattus norvegicus similar to RIKEN cDNA 2410005O16 (LOC500419), mRNA [NM_001031663]	NM_001031663	FALSE
A_44_P519581	0.0240881	0.00193489	-0.124659	0.696931	0.998611	1.27237	1.24726	ENSRNOT00000009897	Tm2d1_predicted	PREDICTED: Rattus norvegicus TM2 domain containing 1 (predicted) (Tm2d1_predicted), mRNA [XM_342866]		FALSE
A_44_P504374	0.0161681	0.000910335	-0.321367	-0.237358	-0.171337	0.066756	1.2154	ENSRNOT00000004097	RGD1311526_predicted	PREDICTED: Rattus norvegicus similar to RIKEN cDNA 5630401D24 (predicted) (RGD1311526_predicted), mRNA [XM_213927]		FALSE
A_44_P347149	0.010121	0.000346809	-0.0303066	0.154633	-0.397379	-0.911082	-2.26527	XM_231524	Aass_predicted	PREDICTED: Rattus norvegicus aminoadipate-semialdehyde synthase (predicted) (Aass_predicted), mRNA [XM_231524]	XM_231524	FALSE
A_44_P309224	0.0159753	0.000878953	-0.154028	0.454121	0.85747	1.11488	1.60175	XR_008637	RGD1565668_predicted	PREDICTED: Rattus norvegicus similar to TGF beta-inducible nuclear protein 1 (L-name related LNR42) (predicted) (RGD1565668_predicted), mRNA [XR_008637]	XR_008637	FALSE
A_43_P20641	0.0487333	0.00665503	-0.143728	0.242864	0.276751	0.239987	-0.855627	CB545948	CB545948	CB545948 AMGNNUC:MRPE4-00305-F10-A mrpe4 (10380) Rattus norvegicus cDNA clone mrpe4-00305-f10 5', mRNA sequence [CB545948]	CB545948	FALSE
A_42_P528844	0.00647142	0.000135999	0.639626	0.151844	-0.0301254	-0.325681	-0.795155	NM_053607	Acsl5	Rattus norvegicus acyl-CoA synthetase long-chain family member 5 (Acsl5), mRNA [NM_053607]	NM_053607	FALSE
A_44_P745393	0.0353997	0.00376923	-0.318907	-0.347925	-0.173112	0.187178	0.643904	ENSRNOT00000023274	ENSRNOT00000023274	BC052920 Cdc2l1 protein {Mus musculus} (exp=-1; wgp=0; cg=0), partial (81%) [TC583248]		FALSE
A_43_P12247	0.037197	0.00413476	0.350994	0.0909691	-0.0723295	-0.463934	-1.02702	NM_022547	Fthfd	Rattus norvegicus formyltetrahydrofolate dehydrogenase (Fthfd), mRNA [NM_022547]	NM_022547	FALSE
A_44_P748217	0.00720304	0.000165279	-0.222815	0.157069	0.535322	0.805295	1.07079	ENSRNOT00000046038	RGD1559545_predicted	PREDICTED: Rattus norvegicus similar to ATPase inhibitory factor 1 (predicted) (RGD1559545_predicted), mRNA [XM_578549]		FALSE
A_44_P225159	0.0103721	0.00037306	-0.421934	0.307657	0.393151	0.574895	0.7215	ENSRNOT00000060718	ENSRNOT00000060718	similar to RNA, U transporter 1 (predicted) (RGD1562801_predicted), mRNA [Source:RefSeq_dna;Acc:XR_009577] [ENSRNOT00000060718]		FALSE
A_42_P656468	0.0387995	0.00446404	0.0576808	0.44842	0.849062	0.899109	0.895112	NM_031706	Rps8	Rattus norvegicus ribosomal protein S8 (Rps8), mRNA [NM_031706]	NM_031706	FALSE
A_44_P554799	0.0131588	0.000620056	-0.35134	0.0789422	0.429748	0.568852	0.576661	NM_031152	Rab11a	Rattus norvegicus RAB11a, member RAS oncogene family (Rab11a), mRNA [NM_031152]	NM_031152	FALSE
A_44_P178117	0.0085901	0.000244618	-0.183311	0.0706372	0.6185	0.7609	1.02562	ENSRNOT00000032528	ENSRNOT00000032528	PREDICTED: Rattus norvegicus similar to ribosomal protein L15 (predicted) (RGD1565767_predicted), mRNA [XM_230013]		FALSE
A_42_P664520	0.0440411	0.00561002	0.114733	0.686669	0.803688	0.904682	1.65567	NM_053430	Fen1	Rattus norvegicus flap structure-specific endonuclease 1 (Fen1), mRNA [NM_053430]	NM_053430	FALSE
A_43_P14175	0.00814469	0.000222648	0.0724673	0.469726	0.87776	1.10537	1.12734	NM_012839	Cycs	Rattus norvegicus cytochrome c, somatic (Cycs), mRNA [NM_012839]	NM_012839	FALSE
A_42_P814765	0.00814469	0.000222969	0.275004	0.110227	-0.138988	-0.659	-1.67692	NM_001013071	Tm7sf2	Rattus norvegicus transmembrane 7 superfamily member 2 (Tm7sf2), mRNA [NM_001013071]	NM_001013071	FALSE
A_44_P496211	0.0353997	0.00377063	0.421236	0.0258409	0.255194	0.494348	1.00578	NM_057139	Hnrpu	Rattus norvegicus heterogeneous nuclear ribonucleoprotein U (Hnrpu), mRNA [NM_057139]	NM_057139	FALSE
A_44_P1018252	0.0415667	0.00504671	-0.118288	0.410836	0.588023	0.87703	1.33041	NM_199092	Orc4l	Rattus norvegicus origin recognition complex, subunit 4-like (S. cerevisiae) (Orc4l), mRNA [NM_199092]	NM_199092	FALSE
A_43_P17954	0.0106837	0.00039281	0.320271	0.532877	0.880716	1.03427	1.28066	XM_217615	RGD1562231_predicted	PREDICTED: Rattus norvegicus similar to Ofd1 protein (predicted) (RGD1562231_predicted), mRNA [XM_217615]	XM_217615	FALSE
A_44_P403005	0.0361685	0.00392269	-0.0377707	-0.158992	0.125649	0.696387	1.19273	NM_001012173	Trub1	Rattus norvegicus TruB pseudouridine (psi) synthase homolog 1 (E. coli) (Trub1), mRNA [NM_001012173]	NM_001012173	FALSE
A_44_P999404	0.0498722	0.00691168	0.231419	0.303771	0.434485	0.268179	-0.270461	NM_031812	Cd164	Rattus norvegicus CD164 antigen (Cd164), mRNA [NM_031812]	NM_031812	FALSE
A_42_P479096	0.0206793	0.0014638	0.0891864	0.409634	0.658445	1.00408	1.29919	NM_001008293	Tfb2m	Rattus norvegicus transcription factor B2, mitochondrial (Tfb2m), mRNA [NM_001008293]	NM_001008293	FALSE
A_43_P12007	0.00466535	5.57133e-05	0.165789	-0.0994412	0.212331	0.519925	2.15908	NM_019283	Slc3a2	Rattus norvegicus solute carrier family 3 (activators of dibasic and neutral amino acid transport), member 2 (Slc3a2), mRNA [NM_019283]	NM_019283	FALSE
A_44_P206091	0.0456586	0.00597777	0.178105	0.105424	0.353168	0.520852	0.81753	CB569793	LOC691814	AGENCOURT_12543562 NICHD_Rr_Pit1 Rattus norvegicus cDNA clone IMAGE:6919188 5', mRNA sequence [CB569793]	CB569793	FALSE
A_44_P869457	0.0160457	0.000889777	0.0527314	-0.15555	0.12332	0.428869	1.40316	TC619249	TC619249	Q5TWV7_ANOGA (Q5TWV7) ENSANGP00000027702 (Fragment), partial (16%) [TC619249]		FALSE
A_44_P446713	0.011874	0.00049615	-0.0610257	-0.120521	0.209971	0.527734	0.836861	ENSRNOT00000021096	Pabpn1	Bcl2-like 2 [Source:RefSeq_peptide;Acc:NP_068622] [ENSRNOT00000021096]		FALSE
A_43_P13367	0.0225128	0.00168158	0.17658	0.318947	0.602912	0.736437	0.864738	NM_139105	Rnh1	Rattus norvegicus ribonuclease/angiogenin inhibitor 1 (Rnh1), mRNA [NM_139105]	NM_139105	FALSE
A_44_P1019537	0.00864364	0.000247707	-0.157433	0.0745813	0.508399	0.64232	0.889904	ENSRNOT00000055289	Cbx5_predicted	PREDICTED: Rattus norvegicus chromobox homolog 5 (Drosophila HP1a) (predicted) (Cbx5_predicted), mRNA [XM_217062]		FALSE
A_44_P475051	0.0161681	0.00090818	-0.0353988	-0.0281702	0.200996	0.466627	0.586043	NM_019131	Tpm1	Rattus norvegicus tropomyosin 1, alpha (Tpm1), transcript variant 6, mRNA [NM_019131]	NM_019131	FALSE
A_42_P702550	0.017681	0.00110496	0.559607	0.582273	0.375247	0.0213282	-0.432075	NM_012661	Sts	Rattus norvegicus steroid sulfatase (Sts), mRNA [NM_012661]	NM_012661	FALSE
A_44_P276968	0.0226635	0.00171013	0.104612	0.784994	0.778629	0.631583	0.056808	ENSRNOT00000006995	Mgea6_predicted	PREDICTED: Rattus norvegicus meningioma expressed antigen 6 (coiled-coil proline-rich) (predicted) (Mgea6_predicted), mRNA [XM_216709]		FALSE
A_44_P408011	0.00509527	7.9125e-05	-0.197707	0.202507	0.63724	0.834456	1.07734	NM_001025738	Fusip1	Rattus norvegicus FUS interacting protein (serine-arginine rich) 1 (Fusip1), mRNA [NM_001025738]	NM_001025738	FALSE
A_44_P822920	0.0319904	0.0032214	-0.260328	-0.383279	0.281515	0.582917	1.11733	DV717319	DV717319	RVL7794 Wackym-Soares normalized rat vestibular cDNA library Rattus norvegicus cDNA 5', mRNA sequence [DV717319]	DV717319	FALSE
A_43_P10785	0.0404039	0.00479875	0.127998	0.527066	0.475187	0.455484	-0.0839925	NM_001008770	RGD1306952	Rattus norvegicus similar to Ab2-225 (RGD1306952), mRNA [NM_001008770]	NM_001008770	FALSE
A_44_P449734	0.0403276	0.00477426	-0.302371	0.433771	0.291404	0.721026	1.29896	AY325254	Da2-19	Rattus norvegicus Da2-19 mRNA, complete cds. [AY325254]	AY325254	FALSE
A_44_P680974	0.010121	0.000348466	0.151337	0.664656	0.497961	0.0501741	-1.36027	CO387403	CO387403	AGENCOURT_26625375 NIH_MGC_253 Rattus norvegicus cDNA clone IMAGE:7304252 5', mRNA sequence [CO387403]	CO387403	FALSE
A_43_P13410	0.019053	0.00127869	0.399579	0.0614417	0.0815422	-0.396184	-1.46764	NM_145097	Serpina4	Rattus norvegicus serine (or cysteine) proteinase inhibitor, clade A (alpha-1 antiproteinase, antitrypsin), member 4 (Serpina4), mRNA [NM_145097]	NM_145097	FALSE
A_44_P467057	0.0148124	0.000772275	0.13273	0.180817	0.655918	0.808813	1.10295	NM_001014188	RGD1307688	Rattus norvegicus similar to RIKEN cDNA 5830446M03 (RGD1307688), mRNA [NM_001014188]	NM_001014188	FALSE
A_44_P330168	0.0174417	0.00108155	-0.728198	0.0348456	0.240557	0.580447	1.12942	NM_053655	Dnm1l	Rattus norvegicus dynamin 1-like (Dnm1l), mRNA [NM_053655]	NM_053655	FALSE
A_44_P653053	0.0395472	0.00460656	-0.211025	0.0827733	-0.427843	-0.99929	-2.18771	NM_001017496	LOC498335	Rattus norvegicus similar to Small inducible cytokine B13 precursor (CXCL13) (B lymphocyte chemoattractant) (CXC chemokine BLC) (LOC498335), mRNA [NM_001017496]	NM_001017496	FALSE
A_43_P11046	0.0355151	0.00380196	0.204121	0.676819	0.869215	0.717657	0.0569992	TC581726	TC581726	Q2JTE7_SYNJA (Q2JTE7) Inosine-uridine preferring nucleoside hydrolase family protein, partial (5%) [TC581726]		FALSE
A_44_P400560	0.0300069	0.00284349	-0.119691	-0.183932	-0.35216	-0.626976	-1.20597	XM_220091	XM_220091	Rattus norvegicus similar to Ahcy protein (LOC309562), mRNA [XM_220091]	XM_220091	FALSE
A_44_P231399	0.03669	0.00400988	-0.134866	0.0138025	0.356485	0.374092	0.382866	NM_001004241	Samm50	Rattus norvegicus sorting and assembly machinery component 50 homolog (S. cerevisiae) (Samm50), mRNA [NM_001004241]	NM_001004241	FALSE
A_44_P413821	0.043671	0.00551845	0.41191	0.341911	0.355573	-0.0292665	-1.05101	AA956104	AA956104	AA956104 UI-R-E1-fi-e-03-0-UI.s1 UI-R-E1 Rattus norvegicus cDNA clone UI-R-E1-fi-e-03-0-UI 3' similar to gi [AA956104]	AA956104	FALSE
A_43_P11432	0.0420844	0.00519226	0.655432	0.618338	0.642704	0.534529	0.122306	NM_012489	Acaa1	Rattus norvegicus acetyl-Coenzyme A acyltransferase 1 (Acaa1), mRNA [NM_012489]	NM_012489	FALSE
A_42_P790241	0.0317553	0.00318724	0.143719	0.244446	0.629488	0.941603	0.954403	ENSRNOT00000021433	Mrpl32_predicted	PREDICTED: Rattus norvegicus mitochondrial ribosomal protein L32 (predicted) (Mrpl32_predicted), mRNA [XM_214491]		FALSE
A_44_P999653	0.0176962	0.00112094	0.360899	-0.0290695	0.325918	0.619324	1.60094	XM_001074043	LOC690308	PREDICTED: Rattus norvegicus similar to tRNA-splicing endonuclease subunit Sen54 (tRNA-intron endonuclease Sen54) (LOC690308), mRNA [XM_001074043]	XM_001074043	FALSE
A_44_P365882	0.0283019	0.00256754	-0.396799	-0.0221832	0.314679	0.490124	0.745492	NM_001014046	RGD1308697	Rattus norvegicus similar to hypothetical protein FLJ10579 (RGD1308697), mRNA [NM_001014046]	NM_001014046	FALSE
A_44_P190999	0.0320496	0.00323777	0.325548	0.335481	0.341047	0.521121	1.58721	BF281299	BF281299	BF281299 EST445890 Rat Gene Index, normalized rat, Rattus norvegicus cDNA Rattus norvegicus cDNA clone RGIAC87 3' sequence, mRNA sequence [BF281299]	BF281299	FALSE
A_44_P424265	0.030696	0.00296492	-0.721711	-0.266726	0.163466	-0.0325622	0.394069	XM_216035	LOC296637	PREDICTED: Rattus norvegicus similar to HLA-B associated transcript-2 isoform a (LOC296637), mRNA [XM_216035]	XM_216035	FALSE
A_44_P218023	0.0322908	0.00328612	-0.651943	0.636368	1.07386	1.43161	1.15335	XR_005821	LOC295142	PREDICTED: Rattus norvegicus similar to peptidylprolyl isomerase D (LOC295142), mRNA [XR_005821]	XR_005821	FALSE
A_44_P586876	0.00900868	0.000272102	-0.314452	-0.196104	0.503009	0.952746	1.89981	XM_001058055	LOC681708	PREDICTED: Rattus norvegicus similar to transmembrane protein 41a (LOC681708), mRNA [XM_001058055]	XM_001058055	FALSE
A_44_P159355	0.00909023	0.000280386	-0.0335895	-0.00789899	0.220793	0.602241	1.02625	ENSRNOT00000014436	RGD1307814_predicted	Rattus norvegicus similar to KIAA1730 protein (LOC362559), mRNA [XM_342878]		FALSE
A_42_P552233	0.00921992	0.000290687	0.387565	0.739949	1.37919	1.77421	1.97332	XM_213765	XM_213765	Rattus norvegicus similar to CCT (chaperonin containing TCP-1) zeta subunit (LOC288620), mRNA [XM_213765]	XM_213765	FALSE
A_44_P384754	0.0210087	0.00150125	-0.132367	0.121375	0.66567	0.795064	1.10608	NM_001008309	Btf3	Rattus norvegicus basic transcription factor 3 (Btf3), mRNA [NM_001008309]	NM_001008309	FALSE
A_43_P10814	0.0281576	0.00253786	-0.131763	2.31325	1.9891	0.372283	1.08473	ENSRNOT00000014348	ENSRNOT00000014348	Nocturnin (CCR4 protein homolog) (Fragment). [Source:Uniprot/SWISSPROT;Acc:Q9ET55] [ENSRNOT00000014348]		FALSE
A_43_P15701	0.0037877	3.82024e-05	-0.155913	-0.0289981	0.274804	0.604158	1.11904	NM_031092	Rab13	Rattus norvegicus RAB13, member RAS oncogene family (Rab13), mRNA [NM_031092]	NM_031092	FALSE
A_43_P17330	0.0413829	0.00501303	0.316707	0.330283	0.574822	0.758522	1.14578	NM_001004229	Nup35	Rattus norvegicus nucleoporin 35 (Nup35), mRNA [NM_001004229]	NM_001004229	FALSE
A_42_P537881	0.00720304	0.000165586	-0.0407506	0.462487	0.819053	1.12142	1.5592	XM_230604	Itpa	PREDICTED: Rattus norvegicus inosine triphosphatase (nucleoside triphosphate pyrophosphatase) (mapped) (Itpa_mapped), mRNA [XM_230604]	XM_230604	FALSE
A_43_P15438	0.0144933	0.000738626	-0.0841924	0.695911	0.802037	0.860614	-0.437728	NM_133554	Slc17a1	Rattus norvegicus solute carrier family 17 (sodium phosphate), member 1 (Slc17a1), mRNA [NM_133554]	NM_133554	FALSE
A_44_P1005770	0.00814469	0.000220362	-0.158026	-0.145611	0.213787	0.459133	1.16136	NM_001037352	Itgb4bp	Rattus norvegicus integrin beta 4 binding protein (Itgb4bp), mRNA [NM_001037352]	NM_001037352	FALSE
A_44_P574648	0.037877	0.00426082	-0.0865964	-0.090409	-0.101758	-0.490511	-1.15741	XM_223745	LOC305633	PREDICTED: Rattus norvegicus similar to Antxr2 protein (LOC305633), mRNA [XM_223745]	XM_223745	FALSE
A_44_P1003117	0.0364465	0.00396381	0.425439	1.10953	0.971651	1.16981	1.63989	XM_215376	Mcm3ap_predicted	PREDICTED: Rattus norvegicus minichromosome maintenance deficient 3 (S. cerevisiae) associated protein (predicted) (Mcm3ap_predicted), mRNA [XM_215376]	XM_215376	FALSE
A_44_P1056473	0.0117845	0.000485494	-0.0814074	0.110504	0.164822	0.442502	1.49099	XM_216408	XM_216408	Rattus norvegicus similar to 80 kDa nuclear cap binding protein (NCBP 80 kDa subunit) (CBP80) (LOC298075), mRNA [XM_216408]	XM_216408	FALSE
A_44_P372277	0.00284077	1.77624e-05	0.153021	0.612507	1.39772	1.66004	1.503	NM_173295	Udpgtr2	Rattus norvegicus liver UDP-glucuronosyltransferase, phenobarbital-inducible form (Udpgtr2), mRNA [NM_173295]	NM_173295	FALSE
A_44_P220868	0.0308378	0.00300002	0.143198	0.0445912	-0.0731866	-0.281331	-0.687528	NM_031698	Rpn2	Rattus norvegicus ribophorin II (Rpn2), mRNA [NM_031698]	NM_031698	FALSE
A_44_P367767	0.010121	0.000346837	0.0762413	0.0401204	0.750513	0.975931	1.42572	NM_001029903	LOC360721	Rattus norvegicus growth and transformation-dependent protein (LOC360721), mRNA [NM_001029903]	NM_001029903	FALSE
A_44_P842474	0.0210473	0.00150956	0.511781	0.383915	0.657887	0.978372	-0.458626	TC605649	TC605649			FALSE
A_42_P472375	0.0247784	0.00202575	0.17911	-0.140127	0.100614	-0.253998	-1.3365	NM_030872	Pdk2	Rattus norvegicus pyruvate dehydrogenase kinase, isoenzyme 2 (Pdk2), mRNA [NM_030872]	NM_030872	FALSE
A_44_P975347	0.0262973	0.00225939	-0.118502	0.515055	0.735081	0.828541	1.76159	TC582893	TC582893			FALSE
A_44_P373413	0.0241822	0.00195193	-0.799246	0.075949	0.396234	0.491821	0.447163	NM_001009825	Ppp1r7	Rattus norvegicus protein phosphatase 1, regulatory (inhibitor) subunit 7 (Ppp1r7), mRNA [NM_001009825]	NM_001009825	FALSE
A_44_P609199	0.0429937	0.00536876	0.29998	1.28978	1.13758	1.52047	2.12313	TC621068	TC621068			FALSE
A_43_P22751	0.0312895	0.00310908	-0.0957459	0.279317	0.370502	0.560183	1.04839	ENSRNOT00000000085	Mtf2	Mtf2 protein (Fragment). [Source:Uniprot/SPTREMBL;Acc:Q566Q3] [ENSRNOT00000000085]		FALSE
A_44_P769872	0.00222533	4.76253e-06	-0.19777	0.191903	-0.153164	-0.744427	-2.17902	BC100087	LOC498793	Rattus norvegicus similar to inter-alpha-inhibitor H2 chain, mRNA (cDNA clone IMAGE:7370417), partial cds [BC100087]	BC100087	FALSE
A_44_P638119	0.04497	0.00581713	0.613249	-0.579643	-0.165394	0.0791887	0.491975	TC605114	TC605114			FALSE
A_44_P468661	0.0381962	0.00431357	-0.145089	-0.265457	0.106733	0.120014	0.426194	XM_001067949	LOC688966	PREDICTED: Rattus norvegicus similar to K11B4.2 (LOC688966), mRNA [XM_001067949]	XM_001067949	FALSE
A_44_P541505	0.0214696	0.00156046	0.936775	0.676481	0.166823	-0.290138	-1.49463	ENSRNOT00000039905	ENSRNOT00000039905	similar to RIKEN cDNA 5031410I06 (LOC686886), mRNA [Source:RefSeq_dna;Acc:XR_009064] [ENSRNOT00000039905]		FALSE
A_43_P11307	0.00635763	0.00013062	-0.169952	0.217024	0.54442	1.03623	2.48083	ENSRNOT00000027173	Impdh1_predicted	PREDICTED: Rattus norvegicus IMP (inosine monophosphate) dehydrogenase 1 (predicted) (Impdh1_predicted), mRNA [XM_342650]		FALSE
A_43_P18153	0.00853086	0.000240882	-0.473361	0.177304	0.258228	0.525779	0.570166	NM_001007683	Glt8d1	Rattus norvegicus glycosyltransferase 8 domain containing 1 (Glt8d1), mRNA [NM_001007683]	NM_001007683	FALSE
A_44_P478110	0.0370113	0.00408055	-0.472239	0.283954	0.362024	0.367533	0.596312	NM_001037645	Rab2b	Rattus norvegicus RAB2B, member RAS oncogene family (Rab2b), mRNA [NM_001037645]	NM_001037645	FALSE
A_44_P226908	0.00927637	0.000294543	-0.341124	0.0916568	0.5819	0.780778	1.20408	NM_013052	Ywhah	Rattus norvegicus tyrosine 3-monooxygenase/tryptophan 5-monooxygenase activation protein, eta polypeptide (Ywhah), mRNA [NM_013052]	NM_013052	FALSE
A_44_P1025476	0.00321992	2.69558e-05	0.0253022	0.10077	0.317218	0.822832	1.24515	NM_053976	Krt1-18	Rattus norvegicus keratin complex 1, acidic, gene 18 (Krt1-18), mRNA [NM_053976]	NM_053976	FALSE
A_44_P1019454	0.0147219	0.000762906	0.150784	0.211059	0.544004	0.749223	1.03199	NM_001013426	Mrpl41	Rattus norvegicus mitochondrial ribosomal protein L41 (Mrpl41), mRNA [NM_001013426]	NM_001013426	FALSE
A_44_P853102	0.0431925	0.00539947	-0.026815	0.137953	0.401294	0.816067	1.60412	TC583187	TC583187	Q2ZHH1_CALSA (Q2ZHH1) Hemin transport system permease protein hmuU precursor (Fragment), partial (6%) [TC583187]		FALSE
A_44_P1048901	0.00485073	6.53286e-05	0.395271	0.155743	0.415733	0.597321	1.26155	NM_001002818	Fkbpl	Rattus norvegicus FK506 binding protein-like (Fkbpl), mRNA [NM_001002818]	NM_001002818	FALSE
A_44_P729533	0.0494254	0.0068053	-0.0285305	0.281815	0.276061	0.199293	-0.395474	XR_005437	RGD1311563	PREDICTED: Rattus norvegicus similar to Oligosaccharyl transferase 3 CG7748-PA (RGD1311563), misc RNA [XR_005437]	XR_005437	FALSE
A_44_P547168	0.0277055	0.00246761	0.0213128	0.364064	0.0855844	-0.726436	-2.41987	NM_022392	Insig1	Rattus norvegicus insulin induced gene 1 (Insig1), mRNA [NM_022392]	NM_022392	FALSE
A_44_P288858	0.0232296	0.00181646	0.245302	0.453812	0.809362	1.09301	1.18072	XM_340963	RGD1563888_predicted	PREDICTED: Rattus norvegicus similar to DNA segment, Chr 16, ERATO Doi 472, expressed (predicted) (RGD1563888_predicted), mRNA [XM_340963]	XM_340963	FALSE
A_44_P493931	0.00788957	0.000203188	-0.240655	-0.244449	-0.633505	-1.28823	-2.5529	NM_012860	Mat1a	Rattus norvegicus methionine adenosyltransferase I, alpha (Mat1a), mRNA [NM_012860]	NM_012860	FALSE
A_44_P367499	0.00921992	0.000291274	0.086821	0.156031	0.231128	0.591091	1.60191	NM_053776	Dnajc2	Rattus norvegicus DnaJ (Hsp40) homolog, subfamily C, member 2 (Dnajc2), mRNA [NM_053776]	NM_053776	FALSE
A_44_P281328	0.0162167	0.000917321	0.299147	0.512295	0.631546	0.810577	1.16639	NM_001012159	Upf3a	Rattus norvegicus UPF3 regulator of nonsense transcripts homolog A (yeast) (Upf3a), mRNA [NM_001012159]	NM_001012159	FALSE
A_44_P350108	0.0085901	0.00024479	0.300244	0.234888	-0.0335681	-0.313534	-1.2253	NM_031760	Abcb11	Rattus norvegicus ATP-binding cassette, sub-family B (MDR/TAP), member 11 (Abcb11), mRNA [NM_031760]	NM_031760	FALSE
A_44_P222981	0.0254789	0.00210885	-0.011804	0.298011	0.112189	-0.322884	-1.71091	XM_001081607	Abca6_predicted	PREDICTED: Rattus norvegicus ATP-binding cassette, sub-family A (ABC1), member 6 (predicted) (Abca6_predicted), mRNA [XM_001081607]	XM_001081607	FALSE
A_44_P540065	0.00532679	8.95426e-05	0.134921	0.301849	0.420395	0.71294	1.06412	NM_152861	Rbm10	Rattus norvegicus RNA binding motif protein 10 (Rbm10), mRNA [NM_152861]	NM_152861	FALSE
A_42_P570394	0.0148842	0.000783962	-0.298048	0.356405	0.444573	0.661679	1.54014	BC107559	LOC497078	Rattus norvegicus XK-related protein 1, mRNA (cDNA clone MGC:124512 IMAGE:7933294), complete cds [BC107559]	BC107559	FALSE
A_42_P533312	0.0148409	0.000775346	0.175524	0.42353	0.162839	-0.308736	-1.69813	NM_012744	Pc	Rattus norvegicus Pyruvate carboxylase (Pc), mRNA [NM_012744]	NM_012744	FALSE
A_43_P20319	0.0140535	0.000696711	-0.162454	-0.121917	0.195353	0.218363	0.915111	ENSRNOT00000011351	RGD1305854_predicted	PREDICTED: Rattus norvegicus similar to DBF4-related protein (predicted) (RGD1305854_predicted), mRNA [XM_231388]		FALSE
A_43_P10008	0.0181565	0.00116897	0.953215	0.0743653	-0.31483	-0.0843781	-0.549939	ENSRNOT00000046539	RGD1562920_predicted	PREDICTED: Rattus norvegicus similar to Aig1 protein (predicted) (RGD1562920_predicted), mRNA [XM_214790]		FALSE
A_44_P524690	0.00711598	0.000159536	-0.0792819	0.43363	0.549369	0.774554	1.1247	NM_053948	Polr2g	Rattus norvegicus polymerase (RNA) II (DNA directed) polypeptide G (Polr2g), mRNA [NM_053948]	NM_053948	FALSE
A_44_P1019726	0.0480134	0.00649853	0.241701	0.000834048	0.223095	0.399199	1.00103	ENSRNOT00000025138	Leng9_predicted	Rattus norvegicus hypothetical LOC292596 (LOC292596), mRNA [XM_214812]		FALSE
A_42_P799494	0.0403276	0.00477544	-0.401823	0.0637562	0.39069	0.525452	1.25412	ENSRNOT00000036258	Htatip2_predicted	PREDICTED: Rattus norvegicus HIV-1 tat interactive protein 2, homolog (human) (predicted) (Htatip2_predicted), mRNA [XM_214927]		FALSE
A_44_P1023498	0.00357763	3.45563e-05	0.0693378	0.433399	0.636388	0.921612	0.80577	NM_022701	Flot1	Rattus norvegicus flotillin 1 (Flot1), mRNA [NM_022701]	NM_022701	FALSE
A_44_P191864	0.00284077	1.73924e-05	-0.0503526	-0.172882	0.299914	0.498439	0.875611	BC086608	Hras	Rattus norvegicus Harvey rat sarcoma viral (v-Ha-ras) oncogene homolog, mRNA (cDNA clone IMAGE:7318824), partial cds. [BC086608]	BC086608	FALSE
A_44_P807238	0.0396239	0.00462055	0.155255	0.369703	0.474668	0.645231	1.30791	TC624296	TC624296			FALSE
A_44_P282276	0.0257831	0.00214917	-0.354605	0.328763	0.444143	0.435634	0.152735	M17068	M17068	RATCAMPS Rat calmodulin processed pseudogene, complete cds [M17068]	M17068	FALSE
A_43_P10631	0.0048877	6.8372e-05	0.880368	0.263317	0.0408928	-0.256679	-1.5809	AW142959	AW142959	AW142959 EST293251 Normalized rat kidney, Bento Soares Rattus sp. cDNA clone RGIBA46 5' end, mRNA sequence [AW142959]	AW142959	FALSE
A_43_P19998	0.0320704	0.00324982	-0.213439	-0.049159	0.0955629	0.316113	0.622345	XM_233168	XM_233168	Rattus norvegicus similar to 5-methylthioadenosine phosphorylase (MTA phosphorylase) (MTAPase) (LOC298227), mRNA [XM_233168]	XM_233168	FALSE
A_44_P179986	0.0173248	0.00106719	0.254237	-0.0191009	-0.033783	-0.232898	-0.655975	NM_017233	Hpd	Rattus norvegicus 4-hydroxyphenylpyruvic acid dioxygenase (Hpd), mRNA [NM_017233]	NM_017233	FALSE
A_43_P11259	0.0128478	0.000589701	0.371083	0.723315	1.08309	1.38683	1.5794	NM_001029898	Mrpl19	Rattus norvegicus ribosomal protein, mitochondrial, L15 (Mrpl19), mRNA [NM_001029898]	NM_001029898	FALSE
A_43_P16774	0.0128478	0.000587528	0.919013	1.27658	1.05862	0.691112	-1.42031	NM_001006995	Acat2	Rattus norvegicus acetyl-Coenzyme A acetyltransferase 2 (Acat2), mRNA [NM_001006995]	NM_001006995	FALSE
A_44_P139939	0.0259156	0.00218298	-0.452329	0.311966	-0.0582299	-0.183383	-1.83916	NM_012532	Cp	Rattus norvegicus ceruloplasmin (Cp), mRNA [NM_012532]	NM_012532	FALSE
A_43_P12758	0.0417916	0.00509759	-0.0288913	-0.266182	-0.327569	-0.828796	-2.32616	NM_053307	Msra	Rattus norvegicus methionine sulfoxide reductase A (Msra), mRNA [NM_053307]	NM_053307	FALSE
A_44_P209911	0.00677953	0.000147247	0.101811	0.208809	0.174791	0.563446	2.0707	NM_022869	Nolc1	Rattus norvegicus nucleolar and coiled-body phosphoprotein 1 (Nolc1), mRNA [NM_022869]	NM_022869	FALSE
A_44_P121177	0.0134379	0.000641814	-0.227009	-0.140995	0.395881	0.593007	1.1711	NM_057208	Tpm3	Rattus norvegicus tropomyosin 3, gamma (Tpm3), transcript variant 1, mRNA [NM_057208]	NM_057208	FALSE
A_43_P10062	0.0126307	0.000566419	0.137365	0.28904	0.197299	-0.0446131	-0.692409	NM_001025423	Adhfe1	Rattus norvegicus alcohol dehydrogenase, iron containing, 1 (Adhfe1), mRNA [NM_001025423]	NM_001025423	FALSE
A_44_P653343	0.00274976	1.54648e-05	1.14265	0.426267	0.373287	0.0739975	-0.466774	TC589367	TC589367			FALSE
A_44_P325005	0.00386342	3.93785e-05	-0.450865	-0.0124509	0.168555	0.524834	1.05469	NM_017198	Pak1	Rattus norvegicus p21 (CDKN1A)-activated kinase 1 (Pak1), mRNA [NM_017198]	NM_017198	FALSE
A_44_P290407	0.037877	0.00426396	0.0560149	0.575979	0.237643	0.112155	-1.09695	XM_001061617	LOC685243	PREDICTED: Rattus norvegicus similar to C-C chemokine receptor type 11 (C-C CKR-11) (CC-CKR-11) (CCR-11) (Chemokine receptor-like 1) (CCRL1) (CCX CKR), transcript variant 2 (LOC685243), mRNA [XM_001061617]	XM_001061617	FALSE
A_44_P810032	0.0403276	0.00477111	0.182675	0.150013	0.44666	0.726759	1.53948	TC602051	TC602051	Q7TQ12_RAT (Q7TQ12) Aa1114, partial (10%) [TC602051]		FALSE
A_42_P787181	0.00708522	0.000158034	0.418122	0.187791	0.247473	0.510077	0.809997	NM_001012745	Zfp422_predicted	Rattus norvegicus zinc finger protein 422 (predicted) (Zfp422_predicted), mRNA [NM_001012745]	NM_001012745	FALSE
A_44_P291862	0.038381	0.00436311	-0.0257186	-0.287175	0.0509652	0.334079	0.922355	BC090554	BC090554	Rattus norvegicus cDNA clone IMAGE:7315352, **** WARNING: chimeric clone ****. [BC090554]	BC090554	FALSE
A_44_P234315	0.00677953	0.000146932	1.5465	0.45021	0.335765	-0.499426	-2.42228	BF289587	BF289587	BF289587 EST454178 Rat Gene Index, normalized rat, Rattus norvegicus cDNA Rattus norvegicus cDNA clone RGIHI76, mRNA sequence [BF289587]	BF289587	FALSE
A_44_P370335	0.00867125	0.000252192	0.14364	0.759017	0.894747	1.2271	2.08719	NM_001011911	Lyar	Rattus norvegicus Ly1 antibody reactive clone (Lyar), mRNA [NM_001011911]	NM_001011911	FALSE
A_44_P468653	0.0178649	0.00113393	-0.267687	0.177979	0.596965	0.647801	0.361009	XR_006143	LOC310182	PREDICTED: Rattus norvegicus similar to heterogeneous nuclear ribonucleoprotein M (LOC310182), mRNA [XR_006143]	XR_006143	FALSE
A_44_P643325	0.0160431	0.000885243	-0.185508	-0.0672772	0.490412	0.674209	0.613104	CO400920	CO400920	AGENCOURT_27827079 NIH_MGC_252 Rattus norvegicus cDNA clone IMAGE:7309263 5', mRNA sequence [CO400920]	CO400920	FALSE
A_42_P563376	0.0368781	0.00405208	0.0556172	-0.288033	0.221127	0.414589	0.632034	NM_145085	Pcyox1	Rattus norvegicus prenylcysteine oxidase 1 (Pcyox1), mRNA [NM_145085]	NM_145085	FALSE
A_44_P468365	0.0346955	0.00363142	-0.320957	-0.134636	0.127221	0.341864	0.86802	NM_030987	Gnb1	Rattus norvegicus guanine nucleotide binding protein, beta 1 (Gnb1), mRNA [NM_030987]	NM_030987	FALSE
A_44_P278810	0.00411119	4.34397e-05	-0.223599	0.127537	0.980768	1.09812	1.42064	XM_214963	XM_214963	Rattus norvegicus similar to U2 small nuclear ribonucleoprotein polypeptide A (LOC292997), mRNA [XM_214963]	XM_214963	FALSE
A_44_P754597	0.0309443	0.00302338	1.29617	1.22838	0.0404061	-0.709346	-4.36668	TC626669	TC626669			FALSE
A_44_P713734	0.0472341	0.00632427	-0.291439	-0.103663	0.194981	0.211655	0.381944	XR_005646	LOC364806	PREDICTED: Rattus norvegicus similar to Elongation factor 1-gamma (EF-1-gamma) (eEF-1B gamma) (LOC364806), mRNA [XR_005646]	XR_005646	FALSE
A_44_P236636	0.045049	0.00582975	0.2207	-0.0654688	0.434569	0.445668	1.22431	XR_005514	LOC367796	PREDICTED: Rattus norvegicus similar to 60S ribosomal protein L13 (LOC367796), mRNA [XR_005514]	XR_005514	FALSE
A_44_P1035546	0.0118035	0.000491943	0.250092	-0.180601	0.199371	0.548071	1.41319	NM_001004211	Ddx56	Rattus norvegicus DEAD (Asp-Glu-Ala-Asp) box polypeptide 56 (Ddx56), mRNA [NM_001004211]	NM_001004211	FALSE
A_44_P914582	0.0423461	0.00523818	0.794088	0.342599	0.444585	0.330014	-0.46046	TC589542	TC589542	Q26268_APLCA (Q26268) Calreticulin, partial (5%) [TC589542]		FALSE
A_44_P714133	0.00750952	0.000178731	0.0293816	0.353071	0.996488	1.32689	1.84075	ENSRNOT00000011063	ENSRNOT00000011063			FALSE
A_44_P555417	0.0445261	0.00570744	-0.017202	-0.0428733	-0.0346632	-0.352853	-1.4292	ENSRNOT00000049914	RGD1310475_predicted	PREDICTED: Rattus norvegicus similar to RIKEN cDNA 0610010D20 (predicted) (RGD1310475_predicted), mRNA [XM_215248]		FALSE
A_42_P835252	0.0128478	0.000587152	0.272651	0.424121	0.471346	0.692832	1.48248	XM_001072892	Timm9	PREDICTED: Rattus norvegicus translocase of inner mitochondrial membrane 9 homolog (yeast) (Timm9), mRNA [XM_001072892]	XM_001072892	FALSE
A_44_P554160	0.0156772	0.00085519	-0.566742	0.0677418	0.406002	0.579597	0.529217	NM_001009825	Ppp1r7	Rattus norvegicus protein phosphatase 1, regulatory (inhibitor) subunit 7 (Ppp1r7), mRNA [NM_001009825]	NM_001009825	FALSE
A_44_P207282	0.00814469	0.000220436	0.303761	0.331298	0.560286	0.956445	2.00547	CA509361	CA509361	CA509361 UI-R-FS0-cqq-m-15-0-UI.s1 NCI_CGAP_FS0 Rattus norvegicus cDNA clone IMAGE:7356953 3', mRNA sequence [CA509361]	CA509361	FALSE
A_44_P547056	0.00976589	0.000322411	0.327091	0.19981	0.371319	0.765616	1.58496	NM_001015023	Rab24	Rattus norvegicus RAB24, member RAS oncogene family (Rab24), mRNA [NM_001015023]	NM_001015023	FALSE
A_42_P815485	0.0301522	0.00286895	0.32379	0.49528	0.702225	0.951199	1.24332	NM_001013908	RGD1306583	Rattus norvegicus similar to RIKEN cDNA 2410002O22 gene (RGD1306583), mRNA [NM_001013908]	NM_001013908	FALSE
A_43_P11636	0.0085133	0.000239875	0.114197	0.195002	0.705327	0.980916	1.03097	NM_012966	Hspe1	Rattus norvegicus heat shock 10 kDa protein 1 (chaperonin 10) (Hspe1), mRNA [NM_012966]	NM_012966	FALSE
A_44_P477819	0.00307904	2.4917e-05	-0.34658	-0.604227	-0.0161788	0.814713	1.96064	NM_031588	Nrg1	Rattus norvegicus neuregulin 1 (Nrg1), mRNA [NM_031588]	NM_031588	FALSE
A_44_P478919	0.00872622	0.000256045	-0.15467	0.26156	0.442295	1.05871	1.70701	XM_214621	Snrpd1_predicted	PREDICTED: Rattus norvegicus small nuclear ribonucleoprotein D1 (predicted) (Snrpd1_predicted), mRNA [XM_214621]	XM_214621	FALSE
A_44_P114732	0.00510944	8.01235e-05	0.0949318	0.231096	0.681856	1.04211	2.05465	TC597807	TC597807	Q3AW45_SYNS9 (Q3AW45) Elongator protein 3/MiaB/NifB, partial (3%) [TC597807]		FALSE
A_44_P448259	0.0172228	0.00105533	-0.0805602	-0.243064	0.164179	0.377931	0.667753	ENSRNOT00000049028	ENSRNOT00000049028	similar to ribosomal protein S19 (predicted) (RGD1565429_predicted), mRNA [Source:RefSeq_dna;Acc:XR_009598] [ENSRNOT00000049028]		FALSE
A_43_P12622	0.00222533	4.72584e-06	0.899654	1.11162	0.569148	-0.0851417	-1.5117	NM_031640	Pgcp	Rattus norvegicus plasma glutamate carboxypeptidase (Pgcp), mRNA [NM_031640]	NM_031640	FALSE
A_44_P487300	0.0323917	0.00331747	0.0738006	0.018101	0.479037	0.655143	1.1284	A_44_P487300	A_44_P487300			FALSE
A_43_P17458	0.0258288	0.00215829	-0.590026	0.0389962	0.234757	0.155309	-0.710695	NM_001014105	RGD1549725	Rattus norvegicus similar to RIKEN cDNA 9430083G14 (RGD1549725), mRNA [NM_001014105]	NM_001014105	FALSE
A_44_P593525	0.040835	0.00492922	0.462373	1.11915	1.03487	0.800936	-0.710288	XR_007360	Atp11c_predicted	PREDICTED: Rattus norvegicus Atpase, class VI, type 11C (predicted) (Atp11c_predicted), mRNA [XR_007360]	XR_007360	FALSE
A_44_P123785	0.0102437	0.000358055	-0.323466	-0.129495	0.537463	0.748313	1.62644	ENSRNOT00000033673	RGD1563498_predicted	PREDICTED: Rattus norvegicus similar to RIKEN cDNA 4930404J24 (predicted) (RGD1563498_predicted), mRNA [XM_344957]		FALSE
A_43_P12162	0.00790266	0.00020545	1.30892	1.05385	0.234043	-0.227809	-2.64274	NM_022209	Ppp2r2b	Rattus norvegicus protein phosphatase 2 (formerly 2A), regulatory subunit B (PR 52), beta isoform (Ppp2r2b), mRNA [NM_022209]	NM_022209	FALSE
A_42_P732189	0.0189073	0.00125215	0.0413554	0.423692	0.869722	0.989082	1.24689	NM_139114	Rpl15	Rattus norvegicus ribosomal protein L15 (Rpl15), mRNA [NM_139114]	NM_139114	FALSE
A_42_P779260	0.0226899	0.00171638	-0.207643	0.184191	0.234546	0.487215	1.41241	XM_222200	Rbm19_predicted	PREDICTED: Rattus norvegicus RNA binding motif protein 19 (predicted) (Rbm19_predicted), mRNA [XM_222200]	XM_222200	FALSE
A_42_P727530	0.0280568	0.00252434	-0.0167354	0.464983	0.529501	0.708169	0.738444	NM_153472	Mnat1	Rattus norvegicus menage a trois 1 (Mnat1), mRNA [NM_153472]	NM_153472	FALSE
A_42_P824657	0.0394445	0.00457944	0.109814	0.37032	0.575543	0.658114	0.851448	ENSRNOT00000031033	RGD1307357_predicted	PREDICTED: Rattus norvegicus similar to hypothetical protein DKFZp434A1319 (predicted) (RGD1307357_predicted), mRNA [XM_214678]		FALSE
A_44_P217266	0.00412095	4.37937e-05	-0.205065	0.0261991	0.73355	1.07974	1.48447	NM_053490	Xpo1	Rattus norvegicus exportin 1, CRM1 homolog (yeast) (Xpo1), mRNA [NM_053490]	NM_053490	FALSE
A_43_P13386	0.022929	0.00176486	0.179384	0.0210987	0.34437	0.806299	1.22546	NM_139333	Prpf19	Rattus norvegicus PRP19/PSO4 pre-mRNA processing factor 19 homolog (S. cerevisiae) (Prpf19), mRNA [NM_139333]	NM_139333	FALSE
A_44_P166447	0.00304726	2.38511e-05	0.0674959	0.00917137	0.344455	0.62441	1.46402	ENSRNOT00000028127	RGD1561264_predicted	AGENCOURT_70325873 NIH_MGC_368 Rattus norvegicus cDNA clone IMAGE:8377838 5', mRNA sequence [DY547683]		FALSE
A_44_P517576	0.0160457	0.000886505	0.235762	0.0271852	-0.15948	-0.543642	-1.62168	NM_177933	Sel1h	Rattus norvegicus Sel1 (suppressor of lin-12) 1 homolog (C. elegans) (Sel1h), mRNA [NM_177933]	NM_177933	FALSE
A_44_P370637	0.0271465	0.00238885	-0.0198641	0.123425	0.581384	0.643014	0.83263	ENSRNOT00000042939	RGD1562265_predicted	PREDICTED: Rattus norvegicus similar to ribosomal protein S12 (predicted) (RGD1562265_predicted), mRNA [XM_233076]		FALSE
A_43_P17026	0.040421	0.00482362	0.0538936	-0.166428	0.144733	0.480462	1.30365	ENSRNOT00000039377	Riok3_predicted	PREDICTED: Rattus norvegicus RIO kinase 3 (yeast) (predicted) (Riok3_predicted), mRNA [XM_341578]		FALSE
A_44_P1010226	0.0309443	0.00301775	0.142332	-0.0338665	0.582594	0.878032	0.866717	ENSRNOT00000039083	Mrpl1_predicted	PREDICTED: Rattus norvegicus mitochondrial ribosomal protein L1 (predicted) (Mrpl1_predicted), mRNA [XM_214008]		FALSE
A_44_P989601	0.023221	0.00181366	0.719308	0.566261	-0.00119418	-0.3264	-1.94787	A_44_P989601	A_44_P989601			FALSE
A_44_P293226	0.0034568	3.16563e-05	-0.0356045	-0.0286503	-0.150185	-0.844011	-2.65124	XM_217310	LOC301113	PREDICTED: Rattus norvegicus similar to solute carrier family 25 (mitochondrial carrier; phosphate carrier), member 23 (LOC301113), mRNA [XM_217310]	XM_217310	FALSE
A_44_P108982	0.0273029	0.0024128	-0.178038	0.296779	0.304855	0.0680795	-0.9572	ENSRNOT00000023516	Sucla2_predicted	PREDICTED: Rattus norvegicus succinate-Coenzyme A ligase, ADP-forming, beta subunit (predicted) (Sucla2_predicted), mRNA [XM_341354]		FALSE
A_44_P546459	0.0135593	0.000658463	0.294547	0.32425	0.579909	0.939291	1.23549	NM_001005875	Psmd12	Rattus norvegicus proteasome (prosome, macropain) 26S subunit, non-ATPase, 12 (Psmd12), mRNA [NM_001005875]	NM_001005875	FALSE
A_44_P227228	0.028992	0.00268014	0.0374521	-0.18187	-0.0245113	0.187635	0.765148	NM_001033884	Rexo4	Rattus norvegicus REX4, RNA exonuclease 4 homolog (S. cerevisiae) (Rexo4), mRNA [NM_001033884]	NM_001033884	FALSE
A_44_P289424	0.0198756	0.0013693	0.040789	0.183642	0.629941	0.79235	0.881871	ENSRNOT00000003460	Mrps14_predicted	PREDICTED: Rattus norvegicus mitochondrial ribosomal protein S14 (predicted) (Mrps14_predicted), mRNA [XM_213906]		FALSE
A_44_P535337	0.0066732	0.000142801	0.327851	0.102316	0.189526	-0.647936	-3.3954	NM_012508	Atp2b2	Rattus norvegicus ATPase, Ca++ transporting, plasma membrane 2 (Atp2b2), mRNA [NM_012508]	NM_012508	FALSE
A_44_P554332	0.0306875	0.00294892	-0.181443	0.210104	0.532403	0.711104	0.575959	NM_012839	Cycs	Rattus norvegicus cytochrome c, somatic (Cycs), mRNA [NM_012839]	NM_012839	FALSE
A_44_P825142	0.0456919	0.00599231	-0.400621	0.0845473	0.27086	0.482355	1.11817	TC612480	TC612480			FALSE
A_43_P20858	0.0455658	0.00595499	-0.813038	-0.264202	0.123125	-0.0967797	-0.0641158	ENSRNOT00000022788	Nhlrc2_predicted	PREDICTED: Rattus norvegicus NHL repeat containing 2 (predicted) (Nhlrc2_predicted), mRNA [XM_217640]		FALSE
A_44_P548024	0.0025923	1.34187e-05	0.223015	0.273357	-0.0656466	-0.591193	-2.06875	NM_133547	Sult1c2	Rattus norvegicus sulfotransferase family, cytosolic, 1C, member 2 (Sult1c2), mRNA [NM_133547]	NM_133547	FALSE
A_44_P115886	0.0386852	0.00444122	-0.212435	-0.128865	-0.203345	-0.542941	-1.53328	NM_001014206	RGD1309534	Rattus norvegicus similar to RIKEN cDNA 4931406C07 (RGD1309534), mRNA [NM_001014206]	NM_001014206	FALSE
A_42_P603700	0.0110746	0.000421566	0.793716	0.705133	0.206839	-0.0426884	-0.575342	NM_144750	LOC246266	Rattus norvegicus lysophospholipase (LOC246266), mRNA [NM_144750]	NM_144750	FALSE
A_44_P179956	0.0348478	0.00367279	-0.0388006	0.113696	0.182939	0.0631685	-0.76694	AY321344	Igtp	Rattus norvegicus Ac2-233 mRNA, complete cds. [AY321344]	AY321344	FALSE
A_44_P121556	0.0115547	0.000469858	-0.243018	0.462874	0.584159	1.19544	2.61694	ENSRNOT00000019363	RGD1305222_predicted	PREDICTED: Rattus norvegicus similar to RIKEN cDNA 1810029B16 (predicted) (RGD1305222_predicted), mRNA [XM_214332]		FALSE
A_43_P21124	0.0367597	0.00403207	-0.47304	-0.0209629	0.287685	0.433218	0.586244	ENSRNOT00000039375	Spast_predicted	Rattus norvegicus similar to KIAA1083 protein (LOC362700), mRNA [XM_343018]		FALSE
A_44_P548420	0.04661	0.00620052	1.10956	0.75603	0.784504	0.715627	-0.196956	NM_001008352	Pmvk	Rattus norvegicus phosphomevalonate kinase (Pmvk), mRNA [NM_001008352]	NM_001008352	FALSE
A_44_P220541	0.0267914	0.00232472	0.120829	0.107043	0.457233	0.637897	0.795632	ENSRNOT00000006402	ENSRNOT00000006402	PREDICTED: Rattus norvegicus similar to e(y)2 protein, transcript variant 2 (LOC685258), mRNA [XM_001062468]		FALSE
A_42_P740209	0.0354359	0.00378015	0.107547	0.0849091	0.466911	0.543782	1.21975	NM_012601	Mpg	Rattus norvegicus N-methylpurine-DNA glycosylase (Mpg), mRNA [NM_012601]	NM_012601	FALSE
A_42_P528779	0.0048877	6.88592e-05	-0.741318	-0.302828	0.222518	0.294824	1.04467	BC085798	Kif12	Rattus norvegicus kinesin family member 12, mRNA (cDNA clone IMAGE:7110267), complete cds. [BC085798]	BC085798	FALSE
A_42_P652897	0.0114784	0.000463081	-0.239169	0.199975	0.367398	0.641917	1.11364	NM_139194	Tnfrsf6	Rattus norvegicus Tumor necrosis factor receptor superfamily, member 6 (Tnfrsf6), mRNA [NM_139194]	NM_139194	FALSE
A_44_P406445	0.0149723	0.000792351	0.566596	-0.0370224	0.241521	0.552592	1.09198	XM_236397	Pigb_predicted	PREDICTED: Rattus norvegicus phosphatidylinositol glycan, class B (predicted) (Pigb_predicted), mRNA [XM_236397]	XM_236397	FALSE
A_44_P669746	0.00624398	0.000124346	0.855489	1.31796	0.948148	0.602492	-1.01193	ENSRNOT00000051669	Cova1_predicted	PREDICTED: Rattus norvegicus cytosolic ovarian carcinoma antigen 1 (predicted) (Cova1_predicted), mRNA [XM_229131]		FALSE
A_44_P482785	0.039498	0.00459289	-0.225584	-0.317704	0.0216033	0.306	1.038	ENSRNOT00000024668	Znf511_predicted	PREDICTED: Rattus norvegicus zinc finger protein 511 (predicted) (Znf511_predicted), mRNA [XM_215107]		FALSE
A_42_P524312	0.017681	0.00111378	0.193227	0.246178	0.402265	0.807324	1.48129	ENSRNOT00000036585	RGD1563531_predicted	PREDICTED: Rattus norvegicus similar to RIKEN cDNA 5330408N05 gene (predicted) (RGD1563531_predicted), mRNA [XR_007690]		FALSE
A_44_P1042859	0.0477229	0.00643439	0.401889	-0.0114803	0.649747	0.73598	0.817806	XM_342936	Ahdc1_predicted	PREDICTED: Rattus norvegicus AT hook, DNA binding motif, containing 1 (predicted) (Ahdc1_predicted), mRNA [XM_342936]	XM_342936	FALSE
A_44_P243111	0.0124563	0.000539552	-0.295824	-0.292174	-0.0855646	0.0631012	0.828741	NM_080580	Rab3d	Rattus norvegicus RAB3D, member RAS oncogene family (Rab3d), mRNA [NM_080580]	NM_080580	FALSE
A_44_P493938	0.00478449	5.99204e-05	-0.223738	-0.155766	-0.439995	-1.15202	-2.58714	NM_012860	Mat1a	Rattus norvegicus methionine adenosyltransferase I, alpha (Mat1a), mRNA [NM_012860]	NM_012860	FALSE
A_43_P21855	0.0441156	0.00563128	-0.404197	0.0788597	0.359089	0.483869	0.63982	NM_001007615	Wipi2	Rattus norvegicus WD repeat domain, phosphoinositide interacting 2 (Wipi2), mRNA [NM_001007615]	NM_001007615	FALSE
A_44_P169327	0.0142626	0.000717996	0.202576	0.328378	0.26096	0.0366316	-0.624964	BC101897	LOC684538	Rattus norvegicus similar to enoyl Coenzyme A hydratase domain containing 3, mRNA (cDNA clone MGC:124810 IMAGE:7932594), complete cds [BC101897]	BC101897	FALSE
A_44_P510918	0.0307365	0.0029754	-0.553427	0.0456501	0.387956	0.46504	0.362826	ENSRNOT00000027321	Rnf121_predicted	PREDICTED: Rattus norvegicus ring finger protein 121 (predicted) (Rnf121_predicted), mRNA [XM_238909]		FALSE
A_43_P16632	0.0324035	0.00332179	0.149284	0.603669	0.851066	0.979076	1.20925	NM_199380	Eif2s2	Rattus norvegicus eukaryotic translation initiation factor 2, subunit 2 (beta) (Eif2s2), mRNA [NM_199380]	NM_199380	FALSE
A_44_P203416	0.00374451	3.7567e-05	0.532792	0.445672	-0.0776846	-0.296501	-1.67819	NM_053917	Inpp4b	Rattus norvegicus inositol polyphosphate-4-phosphatase, type II (Inpp4b), mRNA [NM_053917]	NM_053917	FALSE
A_44_P486659	0.0114784	0.000461871	-0.234815	-0.041945	0.20259	0.511705	1.0023	XM_235822	Mtmr2_predicted	PREDICTED: Rattus norvegicus myotubularin related protein 2 (predicted) (Mtmr2_predicted), mRNA [XM_235822]	XM_235822	FALSE
A_42_P589674	0.0124885	0.000548486	-0.110575	0.243904	0.339878	0.629033	1.14621	NM_001044225	Taf6	Rattus norvegicus TAF6 RNA polymerase II, TATA box binding protein (TBP)-associated factor (Taf6), mRNA [NM_001044225]	NM_001044225	FALSE
A_44_P304408	0.0382612	0.00434631	-0.056686	0.431186	0.739647	1.03038	1.04326	ENSRNOT00000019345	RGD1559475_predicted	PREDICTED: Rattus norvegicus dynactin 3 (predicted) (Dctn3_predicted), mRNA [XM_342822]		FALSE
A_44_P273734	0.00898011	0.000269322	0.52842	0.843242	0.762596	0.550854	-0.61978	ENSRNOT00000001048	Man1a_predicted	mannosidase, alpha, class 1A, member 1 [Source:RefSeq_peptide;Acc:NP_001028828] [ENSRNOT00000001048]		FALSE
A_44_P430922	0.0132581	0.000629579	-0.112825	-0.0768093	-0.248871	-0.470814	-1.59618	XM_346365	F9	PREDICTED: Rattus norvegicus coagulation factor IX (F9), mRNA [XM_346365]	XM_346365	FALSE
A_43_P23361	0.0032633	2.80373e-05	-0.124429	-0.131389	0.107783	0.492506	2.70455	XM_341874	Isg20l1_predicted	PREDICTED: Rattus norvegicus interferon stimulated exonuclease gene 20-like 1 (predicted) (Isg20l1_predicted), mRNA [XM_341874]	XM_341874	FALSE
A_44_P598944	0.0142626	0.00071843	0.376354	0.264408	0.209303	-0.22032	-1.87463	AW143747	AW143747	AW143747 EST294043 Normalized rat embryo, Bento Soares Rattus sp. cDNA clone RGIBZ44 5' end, mRNA sequence [AW143747]	AW143747	FALSE
A_44_P1009757	0.0382549	0.00434014	-0.0953864	-0.0349623	-0.0261595	-0.347966	-1.17042	NM_012968	Il1rap	Rattus norvegicus interleukin 1 receptor accessory protein (Il1rap), mRNA [NM_012968]	NM_012968	FALSE
A_44_P410027	0.0373819	0.00417702	-0.353253	-0.105856	0.176384	0.31889	0.300618	NM_001014136	Ngly1	Rattus norvegicus N-glycanase 1 (Ngly1), mRNA [NM_001014136]	NM_001014136	FALSE
A_43_P19519	0.0312663	0.00310343	-0.366075	-0.301964	-0.00704438	0.133413	0.182018	XM_223781	Vcl_predicted	PREDICTED: Rattus norvegicus vinculin (predicted) (Vcl_predicted), mRNA [XM_223781]	XM_223781	FALSE
A_44_P452797	0.0315542	0.00315718	-0.589542	-0.309203	-0.516181	-0.908865	-2.10679	NM_001014206	RGD1309534	Rattus norvegicus similar to RIKEN cDNA 4931406C07 (RGD1309534), mRNA [NM_001014206]	NM_001014206	FALSE
A_44_P913689	0.00976589	0.000324235	-0.0016402	-0.0416764	0.535352	0.587769	0.888632	A_44_P913689	A_44_P913689			FALSE
A_44_P325791	0.0225128	0.00168195	-0.13145	-0.175789	0.0856407	0.341039	1.24865	NM_019376	Ywhag	Rattus norvegicus tyrosine 3-monooxygenase/tryptophan 5-monooxygenase activation protein, gamma polypeptide (Ywhag), mRNA [NM_019376]	NM_019376	FALSE
A_43_P15775	0.0393371	0.00455739	0.348617	1.09725	1.06707	1.41517	2.69242	NM_001037201	Ddx21a	Rattus norvegicus DEAD (Asp-Glu-Ala-Asp) box polypeptide 21a (Ddx21a), mRNA [NM_001037201]	NM_001037201	FALSE
A_44_P1013113	0.0483435	0.00657857	-0.153283	-0.00167722	0.235049	0.522151	0.964186	ENSRNOT00000039554	Mysm1_predicted	PREDICTED: Rattus norvegicus myb-like, SWIRM and MPN domains 1 (predicted) (Mysm1_predicted), mRNA [XM_216460]		FALSE
A_43_P17213	0.00900868	0.000272016	0.237969	0.769093	0.500777	0.19337	-1.02334	NM_001008520	Abhd1	Rattus norvegicus abhydrolase domain containing 1 (Abhd1), mRNA [NM_001008520]	NM_001008520	FALSE
A_44_P299136	0.0455892	0.00596049	-0.366506	0.0287411	0.162482	0.375092	0.489074	ENSRNOT00000000365	Hace1_predicted	PREDICTED: Rattus norvegicus HECT domain and ankyrin repeat containing, E3 ubiquitin protein ligase 1 (predicted) (Hace1_predicted), mRNA [XM_342160]		FALSE
A_44_P379647	0.0417698	0.00508219	-0.266635	0.333938	0.35736	0.266809	-0.491119	NM_001006970	Uqcrc2	Rattus norvegicus ubiquinol cytochrome c reductase core protein 2 (Uqcrc2), mRNA [NM_001006970]	NM_001006970	FALSE
A_44_P397763	0.0302822	0.00289127	-0.711114	-0.0663659	-0.334699	-0.0245172	1.27139	NM_022869	Nolc1	Rattus norvegicus nucleolar and coiled-body phosphoprotein 1 (Nolc1), mRNA [NM_022869]	NM_022869	FALSE
A_43_P22202	0.0187339	0.00122967	0.346194	0.0442713	0.147667	-0.0229695	-1.77018	NM_001008527	Aox3	Rattus norvegicus aldehyde oxidase 3 (Aox3), mRNA [NM_001008527]	NM_001008527	FALSE
A_42_P509457	0.010121	0.000349801	0.119292	0.00322652	0.317838	0.456577	0.756972	NM_001025630	Arl6ip4	Rattus norvegicus ADP-ribosylation factor-like 6 interacting protein 4 (Arl6ip4), mRNA [NM_001025630]	NM_001025630	FALSE
A_44_P398631	0.022148	0.00163495	-0.0376825	0.107418	0.485814	0.61558	0.737601	XR_006819	LOC366396	PREDICTED: Rattus norvegicus similar to ribosomal protein S12 (LOC366396), mRNA [XR_006819]	XR_006819	FALSE
A_44_P1028551	0.00307904	2.49754e-05	0.0904688	0.0830992	0.50909	1.08196	2.25597	NM_001008323	Pmm1	Rattus norvegicus phosphomannomutase 1 (Pmm1), mRNA [NM_001008323]	NM_001008323	FALSE
A_43_P13337	0.0401317	0.00472337	-0.981187	-0.435281	-0.0716813	0.326919	0.409914	NM_138911	Stip1	Rattus norvegicus stress-induced phosphoprotein 1 (Stip1), mRNA [NM_138911]	NM_138911	FALSE
A_44_P1040609	0.0439224	0.0055844	0.1604	-0.105581	0.229582	0.269646	0.670877	BC099211	Ascc3l1	Rattus norvegicus activating signal cointegrator 1 complex subunit 3-like 1, mRNA (cDNA clone IMAGE:7384540), complete cds. [BC099211]	BC099211	FALSE
A_43_P12418	0.00304726	2.3484e-05	0.598583	0.538275	0.409788	0.210049	-0.374554	NM_024352	Mst1	Rattus norvegicus Macrophage stimulating 1 (hepatocyte growth factor-like) (Mst1), mRNA [NM_024352]	NM_024352	FALSE
A_44_P119127	0.0427271	0.00531647	-0.509717	-0.450494	-0.205025	0.0972097	0.656961	NM_001047906	Bub3	Rattus norvegicus budding uninhibited by benzimidazoles 3 homolog (S. cerevisiae) (Bub3), mRNA [NM_001047906]	NM_001047906	FALSE
A_44_P655531	0.0398404	0.00465522	0.04067	-0.504379	-0.134279	0.213586	0.752658	ENSRNOT00000013639	Sarm1_predicted	PREDICTED: Rattus norvegicus sterile alpha and TIR motif containing 1 (predicted) (Sarm1_predicted), mRNA [XM_213404]		FALSE
A_44_P445536	0.0260339	0.00221175	-0.388613	0.189912	0.337699	0.527952	1.35836	XM_241375	Narg1_predicted	PREDICTED: Rattus norvegicus NMDA receptor-regulated gene 1 (predicted) (Narg1_predicted), mRNA [XM_241375]	XM_241375	FALSE
A_42_P561644	0.00419797	4.52632e-05	0.0944121	0.011553	0.274335	0.473048	0.964582	NM_172074	Timm10	Rattus norvegicus translocase of inner mitochondrial membrane 10 homolog (yeast) (Timm10), mRNA [NM_172074]	NM_172074	FALSE
A_42_P740161	0.049288	0.00677812	-0.351636	-0.598186	-0.200999	-0.131676	0.567211	NM_001007610	Wdr79	Rattus norvegicus WD repeat domain 79 (Wdr79), mRNA [NM_001007610]	NM_001007610	FALSE
A_44_P117207	0.0224562	0.00167272	-0.0796812	0.0163183	0.423716	0.544925	0.739739	XM_235190	RGD1561871_predicted	PREDICTED: Rattus norvegicus similar to ribosomal protein S10 (predicted) (RGD1561871_predicted), mRNA [XM_235190]	XM_235190	FALSE
A_44_P997755	0.0263705	0.00226708	0.576533	0.22698	0.252888	0.150771	-0.73687	NM_031736	Slc27a2	Rattus norvegicus solute carrier family 27 (fatty acid transporter), member 2 (Slc27a2), mRNA [NM_031736]	NM_031736	FALSE
A_44_P287250	0.0287844	0.00265279	-0.224458	0.614138	0.120074	-0.147393	-1.87102	NM_022521	Oat	Rattus norvegicus ornithine aminotransferase (Oat), mRNA [NM_022521]	NM_022521	FALSE
A_43_P18346	0.0259156	0.00217317	0.173922	0.19965	0.34727	-0.402823	-1.92513	NM_001015014	Surf6_predicted	Rattus norvegicus surfeit gene 6 (predicted) (Surf6_predicted), mRNA [NM_001015014]	NM_001015014	FALSE
A_43_P10924	0.0376125	0.00421727	-0.48823	-0.110848	0.255913	0.433675	0.356529	NM_001009180	Capza2	Rattus norvegicus capping protein (actin filament) muscle Z-line, alpha 2 (Capza2), mRNA [NM_001009180]	NM_001009180	FALSE
A_44_P491771	0.010241	0.000356073	-0.178133	-0.266605	0.298743	0.543381	0.848138	NM_031026	Dncli2	Rattus norvegicus dynein, cytoplasmic, light intermediate polypeptide 2 (Dncli2), mRNA [NM_031026]	NM_031026	FALSE
A_44_P187167	0.0370363	0.00409324	-0.188861	-0.292845	0.301447	0.432219	0.841434	NM_001013886	Tubb2b	Rattus norvegicus tubulin, beta 2b (Tubb2b), mRNA [NM_001013886]	NM_001013886	FALSE
A_42_P505280	0.0420466	0.0051787	-0.688708	-0.00244176	0.258763	0.312041	0.330997	NM_001012063	Uble1a	Rattus norvegicus ubiquitin-like 1 (sentrin) activating enzyme E1A (Uble1a), mRNA [NM_001012063]	NM_001012063	FALSE
A_44_P461201	0.0131744	0.000621703	-0.21911	0.0418791	0.239514	0.537413	1.36003	NM_019246	Pcsk7	Rattus norvegicus proprotein convertase subtilisin/kexin type 7 (Pcsk7), mRNA [NM_019246]	NM_019246	FALSE
A_44_P265399	0.0167083	0.000981689	-0.820329	0.174018	0.46942	0.661901	1.36757	ENSRNOT00000031858	Als2cr4_predicted	PREDICTED: Rattus norvegicus amyotrophic lateral sclerosis 2 (juvenile) chromosome region, candidate 4 (predicted) (Als2cr4_predicted), mRNA [XM_237179]		FALSE
A_44_P340434	0.044608	0.00572974	-0.385304	-0.288079	-0.372006	-0.53696	-1.07898	ENSRNOT00000021582	RGD1306041_predicted	PREDICTED: Rattus norvegicus similar to FLJ20699 protein (predicted) (RGD1306041_predicted), mRNA [XM_235549]		FALSE
A_44_P361286	0.016935	0.00101464	0.0924579	0.14614	0.435834	0.584484	0.975278	XM_228592	XM_228592	Rattus norvegicus similar to Eukaryotic translation initiation factor 4B (eIF-4B) (LOC302430), mRNA [XM_228592]	XM_228592	FALSE
A_44_P1043468	0.00481519	6.37263e-05	0.356054	1.0135	0.954613	1.28552	1.57452	XM_214811	Aurkc_predicted	PREDICTED: Rattus norvegicus aurora kinase C (predicted) (Aurkc_predicted), mRNA [XM_214811]	XM_214811	FALSE
A_44_P279007	0.0482269	0.00656014	-0.0221094	0.122845	0.19761	0.645958	1.24287	ENSRNOT00000006549	Prpf40a_predicted	Rattus norvegicus similar to formin binding protein 11 (LOC295607), mRNA [XM_215739]		FALSE
A_43_P11292	0.0124563	0.00054511	-0.0233812	0.568647	0.732165	1.01187	1.04049	ENSRNOT00000010789	ENSRNOT00000010789	similar to RIKEN cDNA 2810013E07 (predicted) (RGD1310592_predicted), mRNA [Source:RefSeq_dna;Acc:XR_008816] [ENSRNOT00000010789]		FALSE
A_44_P371984	0.00758953	0.000181446	0.592228	0.670804	0.561013	0.447831	-0.390659	J02997	Dpp4	Rat bile canaliculus domain-specific membrane glycoprotein mRNA, complete cds. [J02997]	J02997	FALSE
A_44_P606799	0.0451203	0.00584621	0.189417	0.383574	0.526845	0.624529	0.829408	ENSRNOT00000049021	ENSRNOT00000049021	histone cluster 1, H2ai (predicted) (Hist1h2ai_predicted), mRNA [Source:RefSeq_dna;Acc:NM_001013056] [ENSRNOT00000049021]		FALSE
A_42_P552341	0.0225336	0.00168778	1.45445	0.365215	0.0466496	-0.403132	-0.746316	ENSRNOT00000059971	Sorl1	LR11 (Fragment). [Source:Uniprot/SPTREMBL;Acc:Q9R0N2] [ENSRNOT00000059971]		FALSE
A_43_P12035	0.0225428	0.00169235	0.166053	0.0953772	0.52585	0.618144	0.651334	NM_019352	Timm23	Rattus norvegicus translocase of inner mitochondrial membrane 23 homolog (yeast) (Timm23), mRNA [NM_019352]	NM_019352	FALSE
A_44_P140400	0.0307867	0.00298354	-0.00938177	-0.210245	0.294396	0.419902	0.644703	NM_031065	Rpl10a	Rattus norvegicus ribosomal protein L10A (Rpl10a), mRNA [NM_031065]	NM_031065	FALSE
A_44_P234613	0.0431925	0.00540051	-0.383472	-0.441531	0.0481708	0.365452	0.707962	ENSRNOT00000014752	Mrpl45_predicted	PREDICTED: Rattus norvegicus mitochondrial ribosomal protein L45 (predicted) (Mrpl45_predicted), mRNA [XM_213446]		FALSE
A_44_P993647	0.0189082	0.00125729	0.187686	-0.215261	0.260761	0.474492	0.989263	ENSRNOT00000026267	ENSRNOT00000026267	AGENCOURT_11524747 NICHD_Rr_Pit1 Rattus norvegicus cDNA clone IMAGE:6887985 5', mRNA sequence [CB314680]		FALSE
A_43_P13995	0.0142626	0.000717967	0.458774	0.342859	0.312574	0.133769	-0.406563	NM_012564	Gc	Rattus norvegicus group specific component (Gc), mRNA [NM_012564]	NM_012564	FALSE
A_44_P281086	0.0186079	0.00121742	0.0241915	0.197119	0.562894	0.637968	0.589252	ENSRNOT00000031788	Siva_predicted	Apoptosis regulatory protein Siva (CD27-binding protein) (CD27BP). [Source:Uniprot/SWISSPROT;Acc:P59692] [ENSRNOT00000031788]		FALSE
A_44_P142029	0.0054261	9.26599e-05	-0.283372	-0.332146	-0.0906856	0.229635	0.708504	NM_001002851	Nenf	Rattus norvegicus neuron derived neurotrophic factor (Nenf), mRNA [NM_001002851]	NM_001002851	FALSE
A_43_P12879	0.00305204	2.42343e-05	-0.127744	0.187229	0.508811	1.02924	1.70912	NM_053638	Idh3a	Rattus norvegicus isocitrate dehydrogenase 3 (NAD+) alpha (Idh3a), mRNA [NM_053638]	NM_053638	FALSE
A_43_P14796	0.0241822	0.00195249	0.529711	1.9707	0.929445	0.423496	-0.199937	XM_001063452	LOC682861	PREDICTED: Rattus norvegicus similar to adenomatosis polyposis coli down-regulated 1 (LOC682861), mRNA [XM_001063452]	XM_001063452	FALSE
A_44_P671340	0.033379	0.00345386	-0.027809	0.00186461	0.506685	0.669462	0.726291	XR_006448	LOC498601	PREDICTED: Rattus norvegicus similar to cyclin B2 (LOC498601), mRNA [XR_006448]	XR_006448	FALSE
A_44_P1057412	0.0149733	0.000796645	-0.183734	0.560491	0.55371	0.915353	0.78635	NM_031630	Ddx25	Rattus norvegicus DEAD (Asp-Glu-Ala-Asp) box polypeptide 25 (Ddx25), mRNA [NM_031630]	NM_031630	FALSE
A_44_P182257	0.028992	0.00267858	-0.119416	0.0148428	0.256251	0.478085	0.440597	NM_145723	Stx17	Rattus norvegicus syntaxin 17 (Stx17), mRNA [NM_145723]	NM_145723	FALSE
A_44_P556299	0.0367979	0.00403935	1.07458	0.826075	0.896823	0.693435	-0.805157	BF551363	BF551363	BF551363 UI-R-C0-in-h-09-0-UI.r1 UI-R-C0 Rattus norvegicus cDNA clone UI-R-C0-in-h-09-0-UI 5', mRNA sequence [BF551363]	BF551363	FALSE
A_44_P306626	0.0488927	0.00670027	0.348904	-0.170979	0.126471	0.388067	0.857213	ENSRNOT00000013790	ENSRNOT00000013790	Histone H2A type 1-E. [Source:Uniprot/SWISSPROT;Acc:P0C170] [ENSRNOT00000013790]		FALSE
A_44_P281482	0.0191807	0.00129277	1.12264	0.585355	0.11623	0.106109	-0.156416	XM_216212	Chchd6_predicted	PREDICTED: Rattus norvegicus coiled-coil-helix-coiled-coil-helix domain containing 6 (predicted) (Chchd6_predicted), mRNA [XM_216212]	XM_216212	FALSE
A_44_P508906	0.0360792	0.00390654	0.946148	0.143212	-0.353111	0.0530109	-0.174128	XM_343652	XM_343652	Rattus norvegicus similar to RIKEN cDNA 4933431D05 (LOC363312), mRNA [XM_343652]	XM_343652	FALSE
A_43_P19941	0.0023314	6.41641e-06	0.273905	0.385824	0.135677	-0.182296	-0.680208	NM_001013857	Lrrc48	Rattus norvegicus leucine rich repeat containing 48 (Lrrc48), mRNA [NM_001013857]	NM_001013857	FALSE
A_43_P11789	0.0433028	0.0054374	-0.19286	0.364348	0.576521	0.832991	1.29186	NM_017040	Ppp2cb	Rattus norvegicus protein phosphatase 2 (formerly 2A), catalytic subunit, beta isoform (Ppp2cb), mRNA [NM_017040]	NM_017040	FALSE
A_43_P10107	0.0169638	0.00102657	0.705282	0.789496	0.542331	0.388941	-0.50114	TC609188	TC609188	HSA253078 immunoglobulin heavy chain {Homo sapiens} (exp=-1; wgp=0; cg=0), partial (16%) [TC609188]		FALSE
A_44_P228059	0.0161481	0.000904825	0.151648	0.201299	0.1965	-0.0114753	-1.19235	NM_012599	Mbl1	Rattus norvegicus mannose binding lectin 1, protein A (Mbl1), mRNA [NM_012599]	NM_012599	FALSE
A_44_P271018	0.00633533	0.000128762	-0.108102	-0.258086	0.205315	0.39182	0.783966	BG668512	BG668512	BG668512 DRACKA02 Rat DRG Library Rattus norvegicus cDNA clone DRACKA02 5', mRNA sequence [BG668512]	BG668512	FALSE
A_44_P992502	0.0224838	0.00167737	-0.0987746	0.277086	0.39462	0.652719	1.38275	XM_241375	Narg1_predicted	PREDICTED: Rattus norvegicus NMDA receptor-regulated gene 1 (predicted) (Narg1_predicted), mRNA [XM_241375]	XM_241375	FALSE
A_44_P404472	0.0352992	0.00374213	0.408818	0.565962	0.413884	0.422861	-0.760644	XM_223843	Rarb	PREDICTED: Rattus norvegicus retinoic acid receptor, beta (Rarb), mRNA [XM_223843]	XM_223843	FALSE
A_44_P278688	0.0463237	0.00614799	-0.299691	0.289615	0.642731	0.764922	0.710543	NM_053682	Yme1l1	Rattus norvegicus YME1-like 1 (S. cerevisiae) (Yme1l1), mRNA [NM_053682]	NM_053682	FALSE
A_44_P543350	0.00577177	0.000106263	-0.66176	-0.233859	0.0514536	0.284986	0.777587	NM_017063	Kpnb1	Rattus norvegicus karyopherin (importin) beta 1 (Kpnb1), mRNA [NM_017063]	NM_017063	FALSE
A_43_P12844	0.0169355	0.00102103	0.266045	0.109883	0.597624	0.831588	0.818951	NM_053540	Cox17	Rattus norvegicus cytochrome c oxidase, subunit XVII assembly protein homolog (yeast) (Cox17), mRNA [NM_053540]	NM_053540	FALSE
A_44_P1034439	0.0114784	0.000461992	0.483124	1.11211	0.941595	0.440223	-0.70738	NM_022177	Cxcl12	Rattus norvegicus chemokine (C-X-C motif) ligand 12 (Cxcl12), transcript variant 1, mRNA [NM_022177]	NM_022177	FALSE
A_44_P104540	0.0306185	0.00293928	0.899502	-0.013403	-0.297709	-0.434594	0.310082	AI409427	AI409427	AI409427 EST237719 Normalized rat kidney, Bento Soares Rattus sp. cDNA clone RKIDV92 3' end, mRNA sequence [AI409427]	AI409427	FALSE
A_44_P899002	0.042807	0.00533781	1.60838	0.509233	0.856252	0.456144	-0.42688	TC595980	TC595980	Q67T27_SYMTH (Q67T27) RNA polymerase ECF-type sigma factor, partial (5%) [TC595980]		FALSE
A_44_P454847	0.0165915	0.000963316	-0.504063	0.0983561	0.389201	0.466374	0.826263	XM_342460	Ptpmt1	PREDICTED: Rattus norvegicus protein tyrosine phosphatase, mitochondrial 1 (Ptpmt1), mRNA [XM_342460]	XM_342460	FALSE
A_43_P16804	0.0431475	0.00539028	0.0967426	0.0454569	0.550637	0.761529	0.79681	NM_001007652	Pole3	Rattus norvegicus polymerase (DNA directed), epsilon 3 (p17 subunit) (Pole3), mRNA [NM_001007652]	NM_001007652	FALSE
A_43_P10988	0.0320776	0.00325244	-0.0746621	0.117146	0.228613	0.410632	0.508177	XM_341127	Nek7_predicted	PREDICTED: Rattus norvegicus NIMA (never in mitosis gene a)-related expressed kinase 7 (predicted) (Nek7_predicted), mRNA [XM_341127]	XM_341127	FALSE
A_44_P728951	0.0420594	0.00518476	-0.0205913	-0.110244	0.279208	0.30832	0.382393	NM_031838	Rps2	Rattus norvegicus ribosomal protein S2 (Rps2), mRNA [NM_031838]	NM_031838	FALSE
A_44_P487530	0.0369317	0.0040698	-0.365394	-0.273636	-0.0262843	0.253324	0.446421	ENSRNOT00000032324	Tmem56_predicted	Rattus norvegicus cDNA clone IMAGE:5599715, partial cds [BC061828]		FALSE
A_44_P553751	0.00435314	4.86136e-05	-0.0398883	-0.180448	0.302426	0.578171	1.1235	NM_134373	Avpi1	Rattus norvegicus arginine vasopressin-induced 1 (Avpi1), mRNA [NM_134373]	NM_134373	FALSE
A_44_P189853	0.040835	0.00492262	0.0986242	0.0194396	-0.321946	-0.807127	-1.84798	NM_001014006	F12	Rattus norvegicus coagulation factor XII (Hageman factor) (F12), mRNA [NM_001014006]	NM_001014006	FALSE
A_44_P564250	0.0438951	0.00557502	-0.622702	0.163472	0.31492	0.322875	0.302102	BC099078	LOC500584	Rattus norvegicus cDNA clone IMAGE:7442534 [BC099078]	BC099078	FALSE
A_44_P470528	0.0198438	0.00136213	-0.171514	0.222222	0.099888	0.513286	1.77048	NM_198783	Hrpap20	Rattus norvegicus hormone-regulated proliferation associated protein 20 (Hrpap20), mRNA [NM_198783]	NM_198783	FALSE
A_44_P450149	0.0134962	0.000649527	-0.0109198	0.107413	0.510112	0.6108	0.746498	ENSRNOT00000042609	RGD1561928_predicted	PREDICTED: Rattus norvegicus similar to ribosomal protein L9 (predicted) (RGD1561928_predicted), mRNA [XM_224924]		FALSE
A_44_P285681	0.0122241	0.000521217	-0.0432866	-0.0632641	-0.293564	-0.685306	-2.03731	NM_053491	Plg	Rattus norvegicus plasminogen (Plg), mRNA [NM_053491]	NM_053491	FALSE
A_44_P554454	0.00485073	6.56728e-05	-0.0816549	0.263611	0.480743	1.04608	1.91497	NM_031614	Txnrd1	Rattus norvegicus thioredoxin reductase 1 (Txnrd1), mRNA [NM_031614]	NM_031614	FALSE
A_42_P604121	0.043671	0.00551859	-0.407217	0.279	0.352894	0.521711	0.372426	NM_001012144	Tfg	Rattus norvegicus Trk-fused gene (Tfg), mRNA [NM_001012144]	NM_001012144	FALSE
A_43_P14931	0.00222533	5.38856e-06	-0.140497	0.512187	0.845551	1.47336	2.00386	NM_031789	Nfe2l2	Rattus norvegicus nuclear factor, erythroid derived 2, like 2 (Nfe2l2), mRNA [NM_031789]	NM_031789	FALSE
A_44_P291552	0.0175703	0.00109141	0.00927925	0.462575	0.229446	-0.334537	-1.97773	ENSRNOT00000019080	RGD1310174_predicted	PREDICTED: Rattus norvegicus hypothetical LOC298504 (predicted) (RGD1310174_predicted), mRNA [XM_216525]		FALSE
A_43_P12222	0.0357438	0.00383304	0.145962	0.637969	0.834868	0.849348	0.653026	NM_022395	Pmpcb	Rattus norvegicus peptidase (mitochondrial processing) beta (Pmpcb), mRNA [NM_022395]	NM_022395	FALSE
A_43_P12900	0.0445362	0.00571349	0.158749	0.179348	0.247129	0.430489	1.58223	NM_053689	Gtpbp4	Rattus norvegicus GTP binding protein 4 (Gtpbp4), mRNA [NM_053689]	NM_053689	FALSE
A_44_P470935	0.00947653	0.00030545	0.226978	0.576356	0.710013	1.06899	1.51056	ENSRNOT00000012634	Ewsr1	Ewing sarcoma breakpoint region 1. [Source:Uniprot/SPTREMBL;Acc:Q4KM41] [ENSRNOT00000012634]		FALSE
A_44_P419676	0.023221	0.00181215	0.0987558	-0.143416	0.128332	0.34865	0.995446	ENSRNOT00000013604	Zc3hc1_predicted	PREDICTED: Rattus norvegicus zinc finger, C3HC-type 1 (predicted) (Zc3hc1_predicted), mRNA [XM_216113]		FALSE
A_44_P102946	0.0384206	0.00437945	-0.834927	-0.272166	0.282523	0.303955	0.768136	ENSRNOT00000021462	Cul2_predicted	PREDICTED: Rattus norvegicus cullin 2 (predicted) (Cul2_predicted), mRNA [XM_001057445]		FALSE
A_44_P728149	0.00386342	3.92007e-05	-0.946189	-0.582879	0.408459	0.622208	0.957906	NM_001024304	MGC108896	Rattus norvegicus similar to glutathione transferase GSTM7-7 (MGC108896), mRNA [NM_001024304]	NM_001024304	FALSE
A_44_P997079	0.0293478	0.00274073	-0.697221	-0.821707	-0.437343	-0.0858625	0.314655	XM_220981	RGD1308881_predicted	PREDICTED: Rattus norvegicus similar to D11lgp1 (predicted) (RGD1308881_predicted), mRNA [XM_220981]	XM_220981	FALSE
A_44_P999768	0.00353262	3.29177e-05	-0.532718	-0.484213	0.0685127	0.592886	1.86197	AA944506	AA944506	AA944506 EST200005 Normalized rat embryo, Bento Soares Rattus sp. cDNA clone REMAK24 3' end, mRNA sequence [AA944506]	AA944506	FALSE
A_44_P107139	0.0480134	0.00650291	-0.238375	0.157662	0.434077	0.552216	0.784058	NM_130749	Mark3	Rattus norvegicus MAP/microtubule affinity-regulating kinase 3 (Mark3), mRNA [NM_130749]	NM_130749	FALSE
A_44_P404931	0.0487467	0.00666325	0.0693802	-0.0464033	0.256841	0.490031	0.772774	NM_213567	Znrd1	Rattus norvegicus zinc ribbon domain containing, 1 (Znrd1), mRNA [NM_213567]	NM_213567	FALSE
A_44_P807536	0.00772366	0.000195213	0.335278	0.00180495	0.156755	-0.365946	-2.09087	TC587305	TC587305			FALSE
A_44_P637020	0.0127739	0.000578741	-0.0855426	0.247533	0.09566	-0.26521	-1.17669	TC649611	TC649611	STX8_RAT (Q9Z2Q7) Syntaxin-8, partial (65%) [TC649611]		FALSE
A_42_P695017	0.0438593	0.00556112	-0.164503	0.186989	0.160936	0.433247	1.64706	NM_001007758	Nufip1	Rattus norvegicus nuclear fragile X mental retardation protein interacting protein 1 (Nufip1), mRNA [NM_001007758]	NM_001007758	FALSE
A_44_P1030501	0.0245608	0.00200272	0.0845753	-0.195928	0.252709	0.501527	0.83185	ENSRNOT00000025626	RGD1310931_predicted	PREDICTED: Rattus norvegicus similar to hypothetical protein BC013949 (predicted) (RGD1310931_predicted), mRNA [XM_214300]		FALSE
A_44_P1036696	0.0357438	0.00383589	-0.0510339	0.0675784	0.511134	0.677397	0.886615	XM_225881	Napg	PREDICTED: Rattus norvegicus N-ethylmaleimide-sensitive factor attachment protein, gamma (Napg), mRNA [XM_225881]	XM_225881	FALSE
A_44_P1059122	0.0496069	0.00684315	-0.263854	-0.0373678	-0.0444703	0.0917038	1.43368	NM_001025683	RGD1311946	Rattus norvegicus similar to RIKEN cDNA 1810055G02 (RGD1311946), mRNA [NM_001025683]	NM_001025683	FALSE
A_44_P189326	0.0415667	0.0050486	-0.0616514	0.0550705	0.0662489	0.0148873	-1.08053	NM_017319	Pdia3	Rattus norvegicus protein disulfide isomerase associated 3 (Pdia3), mRNA [NM_017319]	NM_017319	FALSE
A_44_P441129	0.00621724	0.000122759	-0.386011	-0.211789	0.250919	0.47032	0.794215	XM_234128	RGD1559724_predicted	PREDICTED: Rattus norvegicus similar to 40S ribosomal protein S19 (predicted) (RGD1559724_predicted), mRNA [XM_234128]	XM_234128	FALSE
A_44_P707189	0.039178	0.00453194	0.421946	0.772977	0.695028	0.489489	-1.29741	BG666908	BG666908	BG666908 DRACQC03 Rat DRG Library Rattus norvegicus cDNA clone DRACQC03 5', mRNA sequence [BG666908]	BG666908	FALSE
A_44_P215788	0.0113016	0.000445908	0.0308841	0.216881	0.823788	1.22408	1.34371	NM_001005905	Cct2	Rattus norvegicus chaperonin containing TCP1, subunit 2 (beta) (Cct2), mRNA [NM_001005905]	NM_001005905	FALSE
A_44_P168285	0.0218054	0.00160465	0.431197	0.587596	0.412397	0.181358	-1.82786	NM_012941	Cyp51	Rattus norvegicus cytochrome P450, subfamily 51 (Cyp51), mRNA [NM_012941]	NM_012941	FALSE
A_42_P453976	0.0168057	0.000992833	0.53672	0.606683	0.0116169	-0.727926	-1.60244	XM_219476	Ifitm6_predicted	PREDICTED: Rattus norvegicus interferon induced transmembrane protein 6 (predicted) (Ifitm6_predicted), mRNA [XM_219476]	XM_219476	FALSE
A_44_P148161	0.0278341	0.00248945	-0.900913	-0.082436	0.214803	0.161967	-0.0833686	NM_001013236	Rrm1	Rattus norvegicus ribonucleotide reductase M1 (Rrm1), mRNA [NM_001013236]	NM_001013236	FALSE
A_44_P868984	0.012212	0.000520049	0.699779	0.777876	0.623325	0.364201	-0.2212	TC586902	TC586902	Q6NLK5_DROME (Q6NLK5) AT22129p, partial (6%) [TC586902]		FALSE
A_44_P387005	0.0237567	0.00189443	0.000784636	0.351359	0.708731	0.861052	0.92352	ENSRNOT00000012214	ENSRNOT00000012214	Rattus norvegicus similar to 2610203E10Rik protein (predicted), mRNA (cDNA clone IMAGE:7127848), partial cds [BC083866]		FALSE
A_44_P189043	0.0302822	0.00289113	-0.383919	0.0948289	0.140909	-0.19787	-2.12388	NM_022865	Gphn	Rattus norvegicus gephyrin (Gphn), mRNA [NM_022865]	NM_022865	FALSE
A_44_P881750	0.017681	0.00111506	0.80132	0.580201	0.578007	0.27195	-0.246107	AW144410	AW144410	AW144410 EST294706 Normalized rat ovary, Bento Soares Rattus sp. cDNA clone RGICR88 5' end, mRNA sequence [AW144410]	AW144410	FALSE
A_42_P722870	0.0147404	0.000766949	0.17798	0.170636	0.443684	0.667359	1.24062	AW141147	AW141147	AW141147 EST291183 Normalized rat brain, Bento Soares Rattus sp. cDNA clone RGIBE08 5' end similar to C-1, putative transcription factor, mRNA sequence [AW141147]	AW141147	FALSE
A_44_P449994	0.0234934	0.00184798	-0.177346	-0.164422	0.175623	0.331405	0.664256	ENSRNOT00000020345	LOC365238	PREDICTED: Rattus norvegicus similar to CG15432-PA (LOC365238), mRNA [XM_001073383]		FALSE
A_44_P272006	0.00864364	0.000250005	-0.10555	-0.322927	0.180412	0.420083	0.989764	XR_006087	LOC290577	PREDICTED: Rattus norvegicus hypothetical LOC290577 (LOC290577), mRNA [XR_006087]	XR_006087	FALSE
A_44_P266879	0.0167461	0.00098659	-0.0851821	-0.315064	0.181572	0.32011	0.793849	NM_212548	Rdbp	Rattus norvegicus RD RNA-binding protein (Rdbp), mRNA [NM_212548]	NM_212548	FALSE
A_42_P819842	0.0111472	0.000433829	-0.15173	-0.250526	0.236242	0.401106	0.650552	ENSRNOT00000000662	ENSRNOT00000000662	PREDICTED: Rattus norvegicus similar to RIKEN cDNA 2010107G23 (predicted) (RGD1305587_predicted), mRNA [XM_215413]		FALSE
A_44_P223817	0.0142626	0.000715025	-0.488291	0.0914669	-0.108541	-0.396444	-1.17945	NM_023093	Atp5a1	Rattus norvegicus ATP synthase, H+ transporting, mitochondrial F1 complex, alpha subunit, isoform 1 (Atp5a1), mRNA [NM_023093]	NM_023093	FALSE
A_44_P130722	0.027512	0.0024401	0.0087173	0.474623	0.699424	0.83354	1.60392	XM_218815	Nmb_predicted	PREDICTED: Rattus norvegicus neuromedin B (predicted) (Nmb_predicted), mRNA [XM_218815]	XM_218815	FALSE
A_44_P920548	0.0487467	0.00666434	-0.391477	0.275239	0.361026	0.568595	1.11592	CO561291	CO561291	AGENCOURT_28467444 NIH_MGC_248 Rattus norvegicus cDNA clone IMAGE:7367104 5', mRNA sequence [CO561291]	CO561291	FALSE
A_44_P373030	0.00727353	0.000169621	0.736754	0.568109	0.020088	-0.0591636	-0.428943	XM_236777	LOC301121	PREDICTED: Rattus norvegicus similar to DNA-binding protein RFX2 (LOC301121), mRNA [XM_236777]	XM_236777	FALSE
A_44_P443686	0.0367211	0.00401583	-0.0694784	-0.0679198	0.192412	0.325184	0.637556	AA956612	AA956612	UI-R-E1-fn-c-03-0-UI.s1 UI-R-E1 Rattus norvegicus cDNA clone UI-R-E1-fn-c-03-0-UI 3' similar to gi [AA956612]	AA956612	FALSE
A_44_P193545	0.00633533	0.00012961	-0.378342	0.196384	0.603718	0.937036	0.999986	NM_001011557	RGD1305677	Rattus norvegicus similar to RIKEN cDNA 1810020E01 (RGD1305677), mRNA [NM_001011557]	NM_001011557	FALSE
A_44_P606112	0.0286896	0.0026322	-0.468169	0.201015	0.120898	-0.234522	-1.26909	BC107915	Trim24	Rattus norvegicus Ab2-427, mRNA (cDNA clone IMAGE:7459236), partial cds. [BC107915]	BC107915	FALSE
A_44_P365421	0.00914794	0.000284607	-0.377332	-0.0292435	0.53074	0.662624	0.828731	NM_139114	Rpl15	Rattus norvegicus ribosomal protein L15 (Rpl15), mRNA [NM_139114]	NM_139114	FALSE
A_44_P403532	0.0388069	0.00447111	-0.0971535	0.0917372	0.591726	0.113569	-1.6929	XM_001078585	RGD1564019_predicted	PREDICTED: Rattus norvegicus similar to GTPase activating RANGAP domain-like 3 (predicted) (RGD1564019_predicted), mRNA [XM_001078585]	XM_001078585	FALSE
A_44_P1000525	0.00532679	8.9223e-05	0.0320604	0.019746	0.519765	0.835548	1.41879	ENSRNOT00000042241	Smc5l1_predicted	PREDICTED: Rattus norvegicus SMC5 structural maintenance of chromosomes 5-like 1 (yeast) (predicted) (Smc5l1_predicted), mRNA [XM_215254]		FALSE
A_44_P452325	0.0434784	0.00547801	-0.7591	0.0997618	-0.0721664	0.0897756	1.03285	NM_001014157	Ltv1	Rattus norvegicus LTV1 homolog (S. cerevisiae) (Ltv1), mRNA [NM_001014157]	NM_001014157	FALSE
A_44_P695179	0.0404149	0.00480735	0.082904	0.49095	0.54539	0.754802	1.41676	XM_219696	Klc2_predicted	PREDICTED: Rattus norvegicus kinesin light chain 2 (predicted) (Klc2_predicted), mRNA [XM_219696]	XM_219696	FALSE
A_42_P597308	0.00284077	1.92165e-05	-0.405137	0.0286948	0.459699	0.634453	0.674786	ENSRNOT00000013434	RGD1306762_predicted	PREDICTED: Rattus norvegicus similar to RIKEN cDNA 2510005D08 (predicted) (RGD1306762_predicted), mRNA [XM_214202]		FALSE
A_44_P590658	0.0174743	0.00108451	-0.497214	0.207672	0.0296769	-0.174303	-0.926152	XR_008645	LOC365654	PREDICTED: Rattus norvegicus similar to ATP synthase beta chain, mitochondrial precursor (LOC365654), mRNA [XR_008645]	XR_008645	FALSE
A_44_P295590	0.0091333	0.000283664	0.191083	0.0219342	0.292391	0.605494	1.19163	XM_340768	RGD1565744_predicted	PREDICTED: Rattus norvegicus similar to RIKEN cDNA 0610007P22 (predicted) (RGD1565744_predicted), mRNA [XM_340768]	XM_340768	FALSE
A_44_P305200	0.0322368	0.00327718	-0.12351	0.135763	0.426034	0.583002	0.578266	NM_012838	Cstb	Rattus norvegicus cystatin B (Cstb), mRNA [NM_012838]	NM_012838	FALSE
A_44_P362723	0.0209278	0.00148776	0.485412	0.15034	0.191651	0.383525	1.02292	ENSRNOT00000019104	Psmd7_predicted	PREDICTED: Rattus norvegicus proteasome (prosome, macropain) 26S subunit, non-ATPase, 7 (predicted) (Psmd7_predicted), mRNA [XM_226439]		FALSE
A_44_P532020	0.0371681	0.00412956	-0.771207	-0.289907	0.0548831	0.232132	0.605388	ENSRNOT00000023827	RGD1306820_predicted	Rattus norvegicus similar to erythroid differentiation-related factor 1 (LOC309069), mRNA [XM_219414]		FALSE
A_44_P728469	0.00512723	8.07157e-05	-0.785697	-0.0388848	0.96526	1.26755	2.34081	NM_022224	Pter	Rattus norvegicus phosphotriesterase related (Pter), mRNA [NM_022224]	NM_022224	FALSE
A_44_P167849	0.0239404	0.00191567	0.283948	0.618355	-0.113915	-0.126032	-1.21375	XM_342171	RGD1562968_predicted	PREDICTED: Rattus norvegicus similar to Single-stranded DNA-binding protein 2 (Sequence-specific single-stranded-DNA-binding protein 2) (predicted) (RGD1562968_predicted), mRNA [XM_342171]	XM_342171	FALSE
A_43_P17743	0.00872622	0.000257132	0.107829	0.485381	0.884421	1.48416	1.96566	NM_001009474	Pir	Rattus norvegicus pirin (Pir), mRNA [NM_001009474]	NM_001009474	FALSE
A_44_P432314	0.0243971	0.00198806	-0.737975	0.118753	0.0429791	0.342449	0.949026	NM_001014073	RGD1305486	Rattus norvegicus similar to RIKEN cDNA 2810405J04 (RGD1305486), mRNA [NM_001014073]	NM_001014073	FALSE
A_44_P557487	0.00963502	0.000312615	0.0146723	-0.188077	-0.164583	-0.437273	-1.3997	NM_053617	Cpb2	Rattus norvegicus carboxypeptidase B2 (plasma) (Cpb2), mRNA [NM_053617]	NM_053617	FALSE
A_43_P20515	0.044819	0.00578085	-0.572059	-0.153784	0.253102	0.329888	0.34164	ENSRNOT00000013905	RGD1309519_predicted	PREDICTED: Rattus norvegicus similar to hypothetical protein FLJ14007 (predicted) (RGD1309519_predicted), mRNA [XM_342213]		FALSE
A_43_P14144	0.0371681	0.00412819	-0.169126	-0.110969	-0.0927566	0.191642	1.85287	XM_222855	Umpk_predicted	PREDICTED: Rattus norvegicus uridine monophosphate kinase (predicted) (Umpk_predicted), mRNA [XM_222855]	XM_222855	FALSE
A_44_P1001528	0.0281621	0.00255186	-0.266195	0.306245	0.748204	0.913286	0.816887	BC061859	Tcirg1	Rattus norvegicus T-cell, immune regulator 1, mRNA (cDNA clone MGC:72583 IMAGE:5598499), complete cds. [BC061859]	BC061859	FALSE
A_44_P482267	0.0323911	0.00331534	-0.574813	0.0283205	0.0623315	-0.485863	-2.49053	NM_134382	Elovl5	Rattus norvegicus ELOVL family member 5, elongation of long chain fatty acids (yeast) (Elovl5), mRNA [NM_134382]	NM_134382	FALSE
A_44_P981159	0.0426336	0.00529422	-0.0718445	-0.225859	0.108615	0.349362	1.19794	TC606378	TC606378			FALSE
A_44_P419482	0.0240881	0.00193589	0.216104	0.544419	0.842992	0.972495	0.918337	ENSRNOT00000011684	LOC305913	PREDICTED: Rattus norvegicus similar to zinc finger protein 198 (LOC305913), mRNA [XM_224241]		FALSE
A_44_P269596	0.0499965	0.00695026	-0.650038	-0.126138	0.303377	0.422564	0.406243	ENSRNOT00000019642	Psmd13_predicted	PREDICTED: Rattus norvegicus proteasome (prosome, macropain) 26S subunit, non-ATPase, 13 (predicted) (Psmd13_predicted), mRNA [XM_344976]		FALSE
A_44_P1032051	0.028992	0.00268092	0.117245	0.33884	0.654045	1.04538	1.56994	XM_001067805	LOC689601	PREDICTED: Rattus norvegicus similar to density-regulated protein, transcript variant 2 (LOC689601), mRNA [XM_001067805]	XM_001067805	FALSE
A_44_P107056	0.00592662	0.000110379	-0.376892	0.0548841	0.650964	0.863151	1.15445	NM_001025624	Hmgn2	Rattus norvegicus high mobility group nucleosomal binding domain 2 (Hmgn2), mRNA [NM_001025624]	NM_001025624	FALSE
A_43_P19306	0.00253917	9.36909e-06	1.55299	1.19116	-0.131508	-0.500034	-1.33546	XM_223660	RGD1309501_predicted	PREDICTED: Rattus norvegicus hypothetical LOC305552 (predicted) (RGD1309501_predicted), mRNA [XM_223660]	XM_223660	FALSE
A_44_P1043261	0.0228055	0.00173499	0.147429	0.370684	0.600267	0.833103	1.41111	NM_001008330	Rpo1-1	Rattus norvegicus RNA polymerase 1-1 (Rpo1-1), mRNA [NM_001008330]	NM_001008330	FALSE
A_42_P548800	0.00814469	0.000222375	0.128817	0.161044	0.541345	0.719311	1.23059	NM_001007696	mrpl9	Rattus norvegicus mitochondrial ribosomal protein L9 (mrpl9), mRNA [NM_001007696]	NM_001007696	FALSE
A_44_P837669	0.0133521	0.000637001	0.183477	0.499577	0.983204	1.26176	1.57072	ENSRNOT00000024753	Abce1	PREDICTED: Rattus norvegicus ATP-binding cassette, sub-family E (OABP), member 1 (Abce1), mRNA [XM_341669]		FALSE
A_44_P214891	0.0330548	0.00340267	0.166533	0.106974	0.656695	0.883638	1.15226	NM_080697	Dynll2	Rattus norvegicus dynein light chain LC8-type 2 (Dynll2), mRNA [NM_080697]	NM_080697	FALSE
A_43_P17769	0.0463237	0.00614651	-0.338311	0.00185037	0.383276	0.701439	0.729685	NM_001008298	Stard3nl	Rattus norvegicus STARD3 N-terminal like (Stard3nl), mRNA [NM_001008298]	NM_001008298	FALSE
A_44_P661802	0.0206793	0.00146355	-0.177754	-0.148602	0.378287	0.64174	0.758255	ENSRNOT00000018022	Eif2a	PREDICTED: Rattus norvegicus eukaryotic translation initiation factor 2A (Eif2a), mRNA [XM_578017]		FALSE
A_44_P148044	0.0406029	0.00485571	-1.48565	0.182789	0.435015	0.550175	-0.0396342	XM_233805	Hnrpll_predicted	PREDICTED: Rattus norvegicus heterogeneous nuclear ribonucleoprotein L-like (predicted) (Hnrpll_predicted), mRNA [XM_233805]	XM_233805	FALSE
A_43_P10806	0.0454211	0.0059175	0.131909	0.154892	0.365401	0.591728	0.695811	XM_347166	Baz1b	PREDICTED: Rattus norvegicus bromodomain adjacent to zinc finger domain protein 1B (Baz1b), mRNA [XM_347166]	XM_347166	FALSE
A_42_P523472	0.032351	0.00330605	-0.229433	-0.108657	0.194541	0.385833	0.407518	AW916914	AW916914	AW916914 EST348127 Rat gene index, normalized rat, norvegicus, Bento Soares Rattus norvegicus cDNA clone RGIDV36 5' end, mRNA sequence [AW916914]	AW916914	FALSE
A_44_P290341	0.0456586	0.00597725	-0.360364	-0.273392	0.0856175	0.384889	0.337575	NM_001008775	U2af1l4	Rattus norvegicus U2 small nuclear RNA auxiliary factor 1-like 4 (U2af1l4), mRNA [NM_001008775]	NM_001008775	FALSE
A_44_P105853	0.0375598	0.00420315	0.305425	0.320056	0.517395	0.877877	1.86896	CB545613	CB545613	CB545613 AMGNNUC:NRDG1-00029-C11-A nrdg1 (10855) Rattus norvegicus cDNA clone nrdg1-00029-c11 5', mRNA sequence [CB545613]	CB545613	FALSE
A_44_P1012606	0.0204408	0.00143661	-0.156493	0.38403	0.587095	0.769581	1.41136	NM_012991	Npap60	Rattus norvegicus nuclear pore associated protein (Npap60), mRNA [NM_012991]	NM_012991	FALSE
A_44_P559149	0.0132946	0.000632997	1.61697	1.4183	1.0848	0.52581	-0.459164	CB568740	CB568740	AGENCOURT_12599762 NICHD_Rr_Pit1 Rattus norvegicus cDNA clone IMAGE:6922186 5', mRNA sequence [CB568740]	CB568740	FALSE
A_44_P439910	0.00455643	5.37366e-05	0.394993	0.668463	0.26637	-0.372738	-1.45775	AW144490	AW144490	AW144490 EST294867 Normalized rat spleen, Bento Soares Rattus sp. cDNA clone RGIAJ51 5' end, mRNA sequence [AW144490]	AW144490	FALSE
A_44_P220481	0.0193484	0.00130717	0.340334	0.207383	0.232413	-0.314992	-0.995605	NM_001034949	LOC500573	Rattus norvegicus similar to RIKEN cDNA 4632413C14 (LOC500573), mRNA [NM_001034949]	NM_001034949	FALSE
A_44_P135339	0.0125566	0.000556603	-0.566579	0.112372	0.892154	1.58793	1.59746	NM_175761	Hspca	Rattus norvegicus heat shock protein 1, alpha (Hspca), mRNA [NM_175761]	NM_175761	FALSE
A_44_P514379	0.0209278	0.00148923	-0.0284684	0.358315	0.248145	-0.108482	-1.84994	X53003	Acaca	Rat mRNA for acetyl-coenzyme A carboxylase (EC 6.4.1.2.) 3' untranslated region [X53003]	X53003	FALSE
A_44_P347250	0.0128478	0.000586437	0.0389265	-0.0679011	-0.18033	-0.749836	-2.75935	NM_001080148	Dhcr24	Rattus norvegicus 24-dehydrocholesterol reductase (Dhcr24), mRNA [NM_001080148]	NM_001080148	FALSE
A_43_P19673	0.0136958	0.000669602	-0.07029	-0.0858367	-0.282961	-0.730386	-1.98807	ENSRNOT00000023418	Lrba_predicted	PREDICTED: Rattus norvegicus LPS-responsive beige-like anchor (predicted) (Lrba_predicted), mRNA [XM_342271]		FALSE
A_44_P1047441	0.00633533	0.000128989	0.71514	1.15121	1.33017	0.676563	-1.4829	NM_030827	Lrp2	Rattus norvegicus low density lipoprotein receptor-related protein 2 (Lrp2), mRNA [NM_030827]	NM_030827	FALSE
A_42_P488076	0.040835	0.00491126	0.00583738	0.0292447	0.408086	0.639347	1.04385	CX569359	CX569359	RVL313 Wackym-Soares normalized rat vestibular cDNA library Rattus norvegicus cDNA 5', mRNA sequence [CX569359]	CX569359	FALSE
A_44_P342245	0.0178791	0.00113825	0.162821	0.0293456	0.40878	0.51097	0.82286	ENSRNOT00000006290	RGD1565602_predicted	PREDICTED: Rattus norvegicus similar to PLU1 (predicted) (RGD1565602_predicted), mRNA [XM_239761]		FALSE
A_44_P241541	0.036057	0.00389837	-0.245554	0.32737	0.390914	0.417783	-0.635972	NM_001017458	Tcp11l2	Rattus norvegicus t-complex 11 (mouse) like 2 (Tcp11l2), mRNA [NM_001017458]	NM_001017458	FALSE
A_44_P449799	0.023998	0.00192481	-0.186152	-0.174731	0.15357	0.451535	0.707627	ENSRNOT00000021096	Pabpn1	Bcl2-like 2 [Source:RefSeq_peptide;Acc:NP_068622] [ENSRNOT00000021096]		FALSE
A_44_P524953	0.00720304	0.000165671	-0.0589256	-0.0634134	0.43152	0.561993	0.752738	NM_053971	Rpl6	Rattus norvegicus ribosomal protein L6 (Rpl6), mRNA [NM_053971]	NM_053971	FALSE
A_44_P452860	0.040421	0.00481903	-0.651196	0.0204983	0.219861	0.370069	0.528652	A_44_P452860	A_44_P452860			FALSE
A_44_P131187	0.00289109	2.05195e-05	-0.382724	-0.00186169	0.467502	0.826894	1.15255	ENSRNOT00000057704	RGD1559979_predicted	Rattus norvegicus similar to RIKEN cDNA 0610008A10 (LOC363086), mRNA [XM_343417]		FALSE
A_44_P489956	0.0300069	0.00284149	-0.994544	-0.141624	-0.0383106	0.0179073	0.26197	ENSRNOT00000016351	Xrn2_predicted	PREDICTED: Rattus norvegicus 5'-3' exoribonuclease 2 (predicted) (Xrn2_predicted), mRNA [XM_342535]		FALSE
A_42_P763157	0.0117422	0.000482425	0.165223	-0.316887	-0.548648	-0.918925	-1.72459	NM_134369	Cyp2t1	Rattus norvegicus cytochrome P450 monooxygenase CYP2T1 (Cyp2t1), mRNA [NM_134369]	NM_134369	FALSE
A_44_P236418	0.013484	0.000646798	-0.522474	-0.533938	0.0281889	0.144015	0.304186	BC091392	Gfm2	Rattus norvegicus G elongation factor, mitochondrial 2, mRNA (cDNA clone IMAGE:7322203), partial cds [BC091392]	BC091392	FALSE
A_42_P687767	0.010121	0.000349247	0.173179	-0.373552	0.138705	0.457391	1.11201	ENSRNOT00000025386	RGD1308635_predicted	PREDICTED: Rattus norvegicus similar to CG12379-PA (predicted) (RGD1308635_predicted), mRNA [XM_216011]		FALSE
A_43_P17094	0.0459793	0.0060483	-0.213086	-0.252119	0.594195	1.08398	0.840466	XM_575803	RGD1561916_predicted	PREDICTED: Rattus norvegicus similar to testes development-related NYD-SP22 isoform 1 (predicted) (RGD1561916_predicted), mRNA [XM_575803]	XM_575803	FALSE
A_44_P311693	0.00313415	2.57508e-05	-0.152238	0.187973	0.366066	0.866191	1.86325	A_44_P311693	A_44_P311693			FALSE
A_44_P685298	0.0161681	0.000911121	-0.031435	0.36605	0.554521	0.716905	0.915603	XM_001075498	LOC691379	PREDICTED: Rattus norvegicus similar to NMDA receptor-regulated gene 2, transcript variant 2 (LOC691379), mRNA [XM_001075498]	XM_001075498	FALSE
A_44_P180865	0.0261855	0.00223992	0.0747916	0.623133	0.761529	1.40124	2.15078	BQ203246	BQ203246	UI-R-DN1-cmt-f-22-0-UI.s1 UI-R-DN1 Rattus norvegicus cDNA clone UI-R-DN1-cmt-f-22-0-UI 3', mRNA sequence [BQ203246]	BQ203246	FALSE
A_42_P553342	0.0382612	0.00434698	0.000674844	0.416676	0.619649	0.809235	1.16218	ENSRNOT00000045280	RGD1565055_predicted	PREDICTED: Rattus norvegicus similar to PDZ-domain protein scribble (predicted) (RGD1565055_predicted), mRNA [XM_343266]		FALSE
A_43_P17988	0.0467711	0.00623232	-0.264817	0.315466	0.563818	0.611992	-0.24239	NM_001025018	Tmem77	Rattus norvegicus transmembrane protein 77 (Tmem77), mRNA [NM_001025018]	NM_001025018	FALSE
A_43_P10101	0.00253917	1.10955e-05	1.09541	0.854693	0.313364	-0.127122	-0.587672	TC589562	TC589562			FALSE
A_44_P501292	0.0401206	0.00471678	-0.0554906	0.000700593	0.402924	0.537724	0.64749	XM_344800	XM_344800	Rattus norvegicus similar to 60S ribosomal protein L19 (LOC365061), mRNA [XM_344800]	XM_344800	FALSE
[truncated: 723 more rows]
