# Supplementary material for: Analysis of Common and Specific Mechanisms of Liver Function Affected by Nitrotoluene Compounds
Source: PLoS One. 2011 Feb 8;6(2):e14662. doi: 10.1371/journal.pone.0014662 (PMC3035612; doi:10.1371/journal.pone.0014662)
Supplement: Table S4 — A table (supplementary table 4) providing a list of genes that were significantly regulated by 2,4DNT at 48 h. (0.46 MB XLSX) [file pone.0014662.s004.xlsx]

## Sheet: 26DNT48h
Supplementary table 4 Significantly regulated genes by 2,6DNT at 48h
ProbeName	Corrected p-value	p-value	["RatL2,6DNT48h_C"](normalized)	["RatL2,6DNT48h_5"](normalized)	["RatL2,6DNT48h_25"](normalized)	["RatL2,6DNT48h_50"](normalized)	["RatL2,6DNT48h_99"](normalized)	Common name	GeneSymbol	Description	GenbankAccession	ControlType
A_43_P12354	0.0248537	0.000937143	-0.316598	-0.646643	-1.15164	-1.10481	-0.817642	NM_022961	Vps33a	Rattus norvegicus vacuolar protein sorting 33A (yeast) (Vps33a), mRNA [NM_022961]	NM_022961	FALSE
A_44_P154298	0.0345558	0.00277369	0.0875781	0.386144	-0.709705	-0.847748	-0.740695	XM_573787	RGD1565970_predicted	PREDICTED: Rattus norvegicus similar to mast cell protease 8 (predicted) (RGD1565970_predicted), mRNA [XM_573787]	XM_573787	FALSE
A_44_P384979	0.0302309	0.00186596	0.182922	0.207546	0.265309	-0.356794	-0.158494	NM_001014257	LOC366012	Rattus norvegicus similar to RIKEN cDNA G430055L02 (LOC366012), mRNA [NM_001014257]	NM_001014257	FALSE
A_43_P15431	0.0182041	0.000105683	-0.181515	-0.117515	-0.49098	-0.809782	-0.827209	NM_053499	Mterf	Rattus norvegicus mitochondrial transcription termination factor 1 (Mterf), mRNA [NM_053499]	NM_053499	FALSE
A_44_P1043081	0.0353213	0.00295621	-0.349212	-0.512128	-0.540474	0.0378929	0.240293	XM_001072402	LOC689890	PREDICTED: Rattus norvegicus similar to splicing factor, arginine [XM_001072402]	XM_001072402	FALSE
A_44_P1045748	0.035281	0.00294267	0.12184	0.00812751	-0.177913	1.35207	1.39918	ENSRNOT00000020476	Lpin2_predicted	PREDICTED: Rattus norvegicus lipin 2 (predicted) (Lpin2_predicted), mRNA [XM_237521]		FALSE
A_44_P389255	0.0381189	0.0036272	0.113857	-0.0125166	0.268996	0.636338	0.680876	A_44_P389255	A_44_P389255			FALSE
A_43_P18448	0.0469221	0.00581936	0.402327	0.347785	0.435863	0.963031	1.57352	XM_218226	XM_218226	Rattus norvegicus similar to mKIAA0287 protein (LOC308321), mRNA [XM_218226]	XM_218226	FALSE
A_44_P241498	0.0401485	0.00414277	0.271468	-0.179243	-0.71413	0.170773	0.301206	ENSRNOT00000013672	ENSRNOT00000013672	PREDICTED: Rattus norvegicus similar to proline arginine rich coiled coil 1, transcript variant 5 (LOC681287), mRNA [XM_001058826]		FALSE
A_42_P728204	0.018484	0.000226512	0.222064	0.0323291	-0.736396	-0.271314	-0.924487	NM_001034849	Gimap1	Rattus norvegicus GTPase, IMAP family member 1 (Gimap1), mRNA [NM_001034849]	NM_001034849	FALSE
A_44_P280933	0.0234048	0.000796996	0.542704	-0.196284	-0.924433	0.899738	1.20643	ENSRNOT00000001160	Vars2	Valyl-tRNA synthetase (EC 6.1.1.9) (Valine--tRNA ligase) (ValRS). [Source:Uniprot/SWISSPROT;Acc:Q04462] [ENSRNOT00000001160]		FALSE
A_44_P431092	0.0387182	0.00377235	0.146871	-0.881034	-0.348753	-0.35678	0.291226	ENSRNOT00000011880	Cyp2d22	Cytochrome P450 2D18 (EC 1.14.14.1) (CYPIID18) (P450 2D-29/2D-35). [Source:Uniprot/SWISSPROT;Acc:Q64680] [ENSRNOT00000011880]		FALSE
A_44_P305636	0.0380901	0.00362029	-0.549047	-0.151584	-0.324373	-1.12647	-0.973059	AA955197	AA955197	AA955197 UI-R-A1-du-d-02-0-UI.s1 UI-R-A1 Rattus norvegicus cDNA clone UI-R-A1-du-d-02-0-UI 3', mRNA sequence [AA955197]	AA955197	FALSE
A_43_P13406	0.0419149	0.00451126	0.225456	-0.0533912	-0.0953472	0.604911	0.611406	NM_145090	Arfgap1	Rattus norvegicus ADP-ribosylation factor GTPase activating protein 1 (Arfgap1), mRNA [NM_145090]	NM_145090	FALSE
A_44_P1046323	0.0285217	0.00153367	0.00280488	-0.238762	-0.254063	0.511187	0.563136	ENSRNOT00000014082	RGD1306404_predicted	PREDICTED: Rattus norvegicus similar to mKIAA1402 protein (predicted) (RGD1306404_predicted), mRNA [XM_216063]		FALSE
A_44_P418694	0.047043	0.00586232	0.0802497	-0.260237	-0.477911	0.00136077	0.0740467	NM_031654	Rabggta	Rattus norvegicus Rab geranylgeranyl transferase, a subunit (Rabggta), mRNA [NM_031654]	NM_031654	FALSE
A_44_P1017335	0.0381189	0.00362739	-0.234088	-0.551487	-0.712227	-0.104539	-0.035679	ENSRNOT00000010210	Cse1l_predicted	PREDICTED: Rattus norvegicus chromosome segregation 1-like (S. cerevisiae) (predicted) (Cse1l_predicted), mRNA [XM_342581]		FALSE
A_44_P898713	0.0303533	0.00190029	-0.238871	-0.319476	-0.323311	0.169172	0.380946	A_44_P898713	A_44_P898713			FALSE
A_44_P166216	0.0394778	0.00398295	-0.0243138	-0.0762544	-0.248591	-0.46103	-0.35527	NM_001013059	Ndfip1	Rattus norvegicus Nedd4 family interacting protein 1 (Ndfip1), mRNA [NM_001013059]	NM_001013059	FALSE
A_42_P620042	0.0256092	0.00101557	0.147416	-0.365555	-0.606167	0.639223	0.530433	NM_032080	Gsk3b	Rattus norvegicus glycogen synthase kinase 3 beta (Gsk3b), mRNA [NM_032080]	NM_032080	FALSE
A_44_P547751	0.0285048	0.00152842	-1.52129	-0.977653	-0.633718	-1.86731	-1.87554	L10336	L10336	RATGNRPA Rattus rattus guanine nucleotide-releasing protein (mss4) mRNA, complete cds [L10336]	L10336	FALSE
A_44_P591224	0.020081	0.000342821	-0.13078	-0.424863	-0.294149	0.697991	0.799464	TC601898	TC601898	Q7TQ12_RAT (Q7TQ12) Aa1114, partial (9%) [TC601898]		FALSE
A_44_P971681	0.0440833	0.00509705	-0.868136	-0.440488	-0.659485	-2.03163	-1.46237	AI169156	AI169156	AI169156 EST214990 Normalized rat kidney, Bento Soares Rattus sp. cDNA clone RKIBO21 3' end, mRNA sequence [AI169156]	AI169156	FALSE
A_44_P804042	0.0270584	0.001276	0.35066	-0.331212	-0.23445	0.958811	1.49634	AW143970	AW143970	AW143970 EST294266 Normalized rat embryo, Bento Soares Rattus sp. cDNA clone RGICE17 5' end, mRNA sequence [AW143970]	AW143970	FALSE
A_42_P781659	0.0286631	0.00157928	-0.130325	-0.50346	-0.867502	-0.0229744	-0.00436103	ENSRNOT00000016818	Reps1_predicted	PREDICTED: Rattus norvegicus RalBP1 associated Eps domain containing protein (predicted) (Reps1_predicted), mRNA [XM_214954]		FALSE
A_42_P489167	0.0469221	0.00582442	-0.164271	-0.433308	-1.33928	-0.0512102	-1.71157	XM_224963	Htra4_predicted	Rattus norvegicus similar to Probable serine protease HTRA4 precursor (LOC306564), mRNA [XM_224963]	XM_224963	FALSE
A_44_P348607	0.0354309	0.00299177	-0.0816971	-0.548916	-0.781242	-0.00509822	0.0587684	NM_001025120	Gtf3c2	Rattus norvegicus general transcription factor IIIC, polypeptide 2, beta 110kDa (Gtf3c2), mRNA [NM_001025120]	NM_001025120	FALSE
A_44_P665677	0.0423044	0.00461232	-0.190505	-0.66417	-0.965023	-0.354399	-0.435263	BF566488	BF566488	BF566488 UI-R-BT1-akg-h-07-0-UI.r1 UI-R-BT1 Rattus norvegicus cDNA clone UI-R-BT1-akg-h-07-0-UI 5', mRNA sequence [BF566488]	BF566488	FALSE
A_42_P762924	0.0182041	0.000148988	-0.195301	-0.605683	-0.943489	0.305238	0.276105	ENSRNOT00000049300	Herc1_predicted	PREDICTED: Rattus norvegicus hect (homologous to the E6-AP (UBE3A) carboxyl terminus) domain and RCC1 (CHC1)-like domain (RLD) 1 (predicted) (Herc1_predicted), mRNA [XM_236362]		FALSE
A_44_P212826	0.0467949	0.00578746	-0.394768	-0.456224	-0.781885	0.133769	0.206659	NM_138528	Ero1l	Rattus norvegicus ERO1-like (S. cerevisiae) (Ero1l), mRNA [NM_138528]	NM_138528	FALSE
A_44_P279912	0.0196408	0.000306589	-0.313607	-0.72151	-1.42488	-0.305942	-0.246611	NM_133381	Crebbp	Rattus norvegicus CREB binding protein (Crebbp), mRNA [NM_133381]	NM_133381	FALSE
A_44_P997962	0.00771489	3.00673e-06	0.32608	0.177652	-0.312404	-0.075195	-0.234883	NM_001004219	RGD1303117	Rattus norvegicus hypothetical protein LOC292764 (RGD1303117), mRNA [NM_001004219]	NM_001004219	FALSE
A_44_P135610	0.0392406	0.00391125	0.130389	-0.0802728	0.0406861	0.505245	0.599731	ENSRNOT00000058548	Larp5_predicted	PREDICTED: Rattus norvegicus La ribonucleoprotein domain family, member 5 (predicted) (Larp5_predicted), mRNA [XM_225526]		FALSE
A_43_P15253	0.0190847	0.000268694	-0.120744	-0.402545	-0.524677	0.875257	0.406345	NM_012967	Icam1	Rattus norvegicus intercellular adhesion molecule 1 (Icam1), mRNA [NM_012967]	NM_012967	FALSE
A_44_P519345	0.0338452	0.00257967	-0.364449	-0.643036	-0.755554	0.347519	0.429593	CF110294	CF110294	Shultzomica03545 Rat lung airway and parenchyma cDNA libraries Rattus norvegicus cDNA clone Contig3134 5', mRNA sequence [CF110294]	CF110294	FALSE
A_42_P813939	0.0323398	0.0022419	-0.0138737	-0.448444	-0.625142	-0.165561	-0.160637	XM_343190	RGD1563028_predicted	PREDICTED: Rattus norvegicus similar to DIP13 beta (predicted) (RGD1563028_predicted), mRNA [XM_343190]	XM_343190	FALSE
A_44_P840849	0.018484	0.000178022	0.915805	0.201183	-0.226184	1.3333	1.32266	ENSRNOT00000000865	ENSRNOT00000000865	similar to male-enhanced antigen-2 (predicted) (RGD1565361_predicted), mRNA [Source:RefSeq_dna;Acc:XR_008591] [ENSRNOT00000000865]		FALSE
A_44_P555594	0.0311953	0.00203066	-0.119708	-0.678267	-0.911357	0.250242	-0.516462	ENSRNOT00000010210	Cse1l_predicted	PREDICTED: Rattus norvegicus chromosome segregation 1-like (S. cerevisiae) (predicted) (Cse1l_predicted), mRNA [XM_342581]		FALSE
A_43_P16210	0.0387182	0.00377341	0.0507147	0.616027	1.10749	-0.475153	-0.0493159	NM_001033655	Dnah1	Rattus norvegicus dynein, axonemal, heavy polypeptide 1 (Dnah1), mRNA [NM_001033655]	NM_001033655	FALSE
A_44_P124121	0.0448814	0.00525519	-0.754053	1.45339	2.2448	-0.950076	-1.36574	NM_001014221	LOC363337	Rattus norvegicus similar to RIKEN cDNA 1700081O22 (LOC363337), mRNA [NM_001014221]	NM_001014221	FALSE
A_43_P14911	0.0260682	0.00110964	0.160108	-0.0617291	-1.15401	-0.399139	-0.877951	NM_031512	Il1b	Rattus norvegicus interleukin 1 beta (Il1b), mRNA [NM_031512]	NM_031512	FALSE
A_44_P787936	0.0259461	0.00109209	-0.20704	-0.707706	-1.13427	0.0523444	-0.463038	NM_012747	Stat3	Rattus norvegicus signal transducer and activator of transcription 3 (Stat3), mRNA [NM_012747]	NM_012747	FALSE
A_44_P419141	0.0272411	0.0013184	-0.173022	-0.440929	-1.31953	0.24853	0.196126	L06821	Nup153	Rat nuclear pore complex protein mRNA sequence. [L06821]	L06821	FALSE
A_42_P487852	0.0497411	0.00659721	-0.0892166	-0.592352	-0.708578	0.48304	0.349297	NM_022401	Plec1	Rattus norvegicus plectin 1 (Plec1), mRNA [NM_022401]	NM_022401	FALSE
A_44_P994550	0.0307206	0.00194258	-0.0960745	-0.0609643	-0.367731	-0.474629	-0.330488	ENSRNOT00000011688	Rarsl_predicted	PREDICTED: Rattus norvegicus arginyl-tRNA synthetase-like (predicted) (Rarsl_predicted), mRNA [XM_216367]		FALSE
A_44_P1047403	0.0421457	0.0045786	0.135636	-0.467242	-0.0348058	0.636385	0.180546	ENSRNOT00000028010	Zbtb7b_predicted	PREDICTED: Rattus norvegicus zinc finger and BTB domain containing 7B (predicted) (Zbtb7b_predicted), mRNA [XM_215633]		FALSE
A_44_P187213	0.0222025	0.000659441	0.302862	-0.190913	-0.214585	0.706413	0.877482	NM_053778	Ipo13	Rattus norvegicus importin 13 (Ipo13), mRNA [NM_053778]	NM_053778	FALSE
A_44_P257075	0.0420807	0.00454148	0.308158	-0.0851029	-0.989779	0.751127	1.09084	CK598676	CK598676	AGENCOURT_17840178 NIH_MGC_238 Rattus norvegicus cDNA clone IMAGE:7133577 5', mRNA sequence [CK598676]	CK598676	FALSE
A_43_P20900	0.0363341	0.00318769	0.327203	-0.0155582	-0.198191	0.936819	0.987905	XM_001072232	RGD1562952_predicted	PREDICTED: Rattus norvegicus similar to Erbb2 interacting protein isoform 2 (predicted) (RGD1562952_predicted), mRNA [XM_001072232]	XM_001072232	FALSE
A_44_P299830	0.0372873	0.00337142	0.0285186	0.334993	-0.305996	-0.702587	-0.471795	NM_001009707	RGD1359508	Rattus norvegicus similar to protein C33A12.3 (RGD1359508), mRNA [NM_001009707]	NM_001009707	FALSE
A_44_P193181	0.0263791	0.00115466	0.40721	-0.110967	0.142739	0.813197	1.03436	NM_017008	Gapdh	Rattus norvegicus glyceraldehyde-3-phosphate dehydrogenase (Gapdh), mRNA [NM_017008]	NM_017008	FALSE
A_44_P683666	0.0369859	0.0032981	-0.248708	-0.679026	-1.45822	-0.0220064	0.112389	XM_216893	Cpsf6_predicted	PREDICTED: Rattus norvegicus cleavage and polyadenylation specific factor 6, 68kDa (predicted) (Cpsf6_predicted), mRNA [XM_216893]	XM_216893	FALSE
A_44_P148720	0.0196408	0.000306634	0.0564841	-0.345643	-0.304552	0.451908	0.547908	NM_177930	Vac14	Rattus norvegicus Vac14 homolog (S. cerevisiae) (Vac14), mRNA [NM_177930]	NM_177930	FALSE
A_44_P1041279	0.0313758	0.00206208	0.00644386	-0.371309	-1.12617	-0.211005	-1.69188	NM_198785	Usp48	Rattus norvegicus ubiquitin specific protease 48 (Usp48), mRNA [NM_198785]	NM_198785	FALSE
A_44_P342166	0.039537	0.00400243	0.721821	0.138578	-0.00595987	0.570548	0.689174	NM_013187	Plcg1	Rattus norvegicus phospholipase C, gamma 1 (Plcg1), mRNA [NM_013187]	NM_013187	FALSE
A_44_P839206	0.018045	7.66818e-05	-0.416112	-0.742545	-0.768719	0.0522798	0.107849	NM_001029925	LOC499474	Rattus norvegicus similar to osteopetrosis associated transmembrane protein 1 (LOC499474), mRNA [NM_001029925]	NM_001029925	FALSE
A_44_P807091	0.018484	0.000233066	-0.207265	-0.38758	-0.431054	0.259112	0.363338	XM_215082	Cd2bp2_predicted	PREDICTED: Rattus norvegicus CD2 antigen (cytoplasmic tail) binding protein 2 (predicted) (Cd2bp2_predicted), mRNA [XM_215082]	XM_215082	FALSE
A_44_P115847	0.018484	0.000194058	-0.197616	-0.152497	-0.231109	-0.773142	-1.03928	AA899448	AA899448	AA899448 UI-R-E0-cu-g-01-0-UI.s2 UI-R-E0 Rattus norvegicus cDNA clone UI-R-E0-cu-g-01-0-UI 3' similar to gi [AA899448]	AA899448	FALSE
A_44_P1029241	0.0485223	0.00629487	0.390068	0.482931	0.554548	-0.256719	-0.272306	ENSRNOT00000014267	Car1_predicted	PREDICTED: Rattus norvegicus carbonic anhydrase 1 (predicted) (Car1_predicted), mRNA [XM_226922]		FALSE
A_42_P837865	0.0350961	0.00288355	0.0684178	-0.438013	-0.631149	0.398526	-0.310803	ENSRNOT00000005463	Nedd1_predicted	PREDICTED: Rattus norvegicus neural precursor cell expressed, developmentally down-regulated gene 1 (predicted) (Nedd1_predicted), mRNA [XM_216878]		FALSE
A_44_P463345	0.018484	0.000226401	-0.810644	-0.298058	0.0790995	-1.27973	-1.25675	AW253787	Vkorc1	AW253787 UI-R-BJ0-acz-d-05-0-UI.s1 UI-R-BJ0 Rattus norvegicus cDNA clone UI-R-BJ0-acz-d-05-0-UI 3', mRNA sequence [AW253787]	AW253787	FALSE
A_44_P508901	0.0334885	0.00246609	0.109992	-0.0767354	-0.110873	1.04613	0.928573	NM_001014273	LOC367902	Rattus norvegicus similar to ALEX3 protein (LOC367902), mRNA [NM_001014273]	NM_001014273	FALSE
A_44_P819884	0.0322433	0.002206	0.198087	0.00475985	-0.137944	0.685394	-0.347538	ENSRNOT00000008281	Cpne3_predicted	AW142995 EST293287 Normalized rat ovary, Bento Soares Rattus sp. cDNA clone RGIBB23 5' end, mRNA sequence [AW142995]		FALSE
A_43_P14802	0.0183556	0.000158495	-0.364948	-0.861314	-1.67729	-0.188685	-0.42321	ENSRNOT00000024714	Ncoa6	Nuclear receptor coactivator 6 (Amplified in breast cancer protein 3) (Cancer-amplified transcriptional coactivator ASC-2) (Activating signal cointegrator 2) (ASC-2) (Peroxisome proliferator-activated receptor-interacting protein) (PPAR-interacting...		FALSE
A_44_P699797	0.0182041	0.000137041	-0.420122	-0.172442	-0.45717	-0.96685	-0.944319	XM_226211	Tk2_predicted	PREDICTED: Rattus norvegicus thymidine kinase 2, mitochondrial (predicted) (Tk2_predicted), mRNA [XM_226211]	XM_226211	FALSE
A_42_P780715	0.0323972	0.00226936	0.0354655	-0.437652	-0.385221	0.573107	0.726566	XM_223541	XM_223541	Rattus norvegicus similar to leucine zipper-EF-hand containing transmembrane protein 1 (LOC305457), mRNA [XM_223541]	XM_223541	FALSE
A_44_P136845	0.0309922	0.00200354	-0.218272	-0.606594	-1.02143	0.00499547	-0.81908	XM_340879	Spag9_predicted	PREDICTED: Rattus norvegicus sperm associated antigen 9 (predicted) (Spag9_predicted), mRNA [XM_340879]	XM_340879	FALSE
A_44_P370678	0.0300599	0.00183374	0.181999	-0.321464	-0.9849	-0.30794	-1.23822	XR_006663	LOC293917	PREDICTED: Rattus norvegicus similar to heterogeneous nuclear ribonucleoprotein H2 (LOC293917), mRNA [XR_006663]	XR_006663	FALSE
A_44_P803484	0.0347947	0.00282399	0.0791718	-0.266633	-0.770962	-0.0275851	0.116843	BG666368	BG666368	BG666368 DRACHF07 Rat DRG Library Rattus norvegicus cDNA clone DRACHF07 5', mRNA sequence [BG666368]	BG666368	FALSE
A_44_P658529	0.0340245	0.00263092	-0.525285	-0.611288	-1.1074	-0.35694	-0.272357	XM_224620	RGD1559931_predicted	PREDICTED: Rattus norvegicus similar to Ankyrin repeat domain protein 28 (predicted) (RGD1559931_predicted), mRNA [XM_224620]	XM_224620	FALSE
A_44_P822464	0.0464234	0.00565683	-0.150938	-0.819323	-0.957914	0.0492197	0.182915	XM_001067472	Cap350	PREDICTED: Rattus norvegicus centrosome-associated protein 350 (Cap350), mRNA [XM_001067472]	XM_001067472	FALSE
A_43_P10751	0.0348173	0.00283072	-0.0725139	-0.0735621	-0.343715	-0.57517	-0.354691	NM_001033900	Ngrn	Rattus norvegicus mesenchymal stem cell protein DSC92 (Ngrn), mRNA [NM_001033900]	NM_001033900	FALSE
A_44_P853016	0.0222025	0.000658132	0.112746	-0.462489	-0.830408	0.288022	0.0535992	AW535588	AW535588	UI-R-C4-aly-e-02-0-UI.s1 UI-R-C4 Rattus norvegicus cDNA clone UI-R-C4-aly-e-02-0-UI 3', mRNA sequence [AW535588]	AW535588	FALSE
A_44_P546476	0.031494	0.00208862	0.000574827	-0.550663	-0.808279	0.254795	0.312864	XM_573318	RGD1566176_predicted	PREDICTED: Rattus norvegicus similar to YEATS domain containing 2 (predicted) (RGD1566176_predicted), mRNA [XM_573318]	XM_573318	FALSE
A_44_P550738	0.0299969	0.0018106	0.316829	0.360857	0.142215	-0.960625	-2.07214	NM_001014172	Rsrc1	Rattus norvegicus arginine/serine-rich coiled-coil 1 (Rsrc1), mRNA [NM_001014172]	NM_001014172	FALSE
A_43_P21510	0.0252274	0.000970901	-0.0280242	0.0540658	-0.443902	0.616672	0.971231	NM_212518	Abcb7	Rattus norvegicus ATP-binding cassette, sub-family B (MDR/TAP), member 7 (Abcb7), mRNA [NM_212518]	NM_212518	FALSE
A_44_P338970	0.0376646	0.00346609	0.188398	-0.254679	-0.475731	0.53514	0.647107	NM_030992	Pld1	Rattus norvegicus phospholipase D1 (Pld1), mRNA [NM_030992]	NM_030992	FALSE
A_42_P759184	0.018045	6.68038e-05	-0.251019	-0.627124	-1.92376	-0.905082	-0.882586	XM_341386	LOC361100	PREDICTED: Rattus norvegicus similar to topoisomerase (DNA) II beta (LOC361100), mRNA [XM_341386]	XM_341386	FALSE
A_42_P653911	0.0497411	0.00660565	-0.0753781	-0.343238	-0.637561	-0.147425	-0.038673	NM_134419	Hspbap1	Rattus norvegicus Hspb associated protein 1 (Hspbap1), mRNA [NM_134419]	NM_134419	FALSE
A_43_P15242	0.0383712	0.00367298	-0.0595621	-0.369645	-1.05074	-1.0181	-0.914908	NM_012576	Nr3c1	Rattus norvegicus nuclear receptor subfamily 3, group C, member 1 (Nr3c1), mRNA [NM_012576]	NM_012576	FALSE
A_44_P506693	0.0443486	0.00514847	0.472163	0.0181633	-0.228039	-0.0290983	0.224128	NM_001014219	RGD1359242	Rattus norvegicus ankyrin repeat containing protein RGD1359242 (RGD1359242), mRNA [NM_001014219]	NM_001014219	FALSE
A_44_P311225	0.0290421	0.00165959	0.370767	0.963964	1.56524	0.267627	0.13456	NM_001000884	Olr1117_predicted	Rattus norvegicus olfactory receptor 1117 (predicted) (Olr1117_predicted), mRNA [NM_001000884]	NM_001000884	FALSE
A_44_P482346	0.0303387	0.00188676	0.414437	0.259461	0.101268	1.70446	0.961831	NM_017318	Ptk2b	Rattus norvegicus protein tyrosine kinase 2 beta (Ptk2b), mRNA [NM_017318]	NM_017318	FALSE
A_44_P456172	0.0305614	0.00192701	0.180168	-0.328836	-1.05264	-0.880312	-0.866812	NM_001014265	Mterfd3	Rattus norvegicus MTERF domain containing 3 (Mterfd3), mRNA [NM_001014265]	NM_001014265	FALSE
A_44_P336664	0.020908	0.000508315	-0.0595268	-0.647774	-1.85055	0.0681738	0.295961	CF108444	CF108444	Shultzomica01695 Rat lung airway and parenchyma cDNA libraries Rattus norvegicus cDNA clone Contig1362 5', mRNA sequence [CF108444]	CF108444	FALSE
A_44_P333168	0.0182041	0.000118286	0.21349	-0.0956901	-0.376107	0.230284	0.543454	ENSRNOT00000051945	RGD1565149_predicted	PREDICTED: Rattus norvegicus similar to chromosome 16 open reading frame 7 (predicted) (RGD1565149_predicted), mRNA [XM_226551]		FALSE
A_44_P911967	0.0481757	0.00618763	0.0807214	-0.175369	-0.292562	-0.236266	-0.171009	ENSRNOT00000027441	Pias4	Pias4 protein (Fragment). [Source:Uniprot/SPTREMBL;Acc:Q4G041] [ENSRNOT00000027441]		FALSE
A_42_P529077	0.0220226	0.000616895	-0.156718	0.0244197	0.342989	-0.470698	-0.27205	NM_053417	Gab2	Rattus norvegicus growth factor receptor bound protein 2-associated protein 2 (Gab2), mRNA [NM_053417]	NM_053417	FALSE
A_42_P733175	0.031494	0.00209223	-0.0182203	-0.148205	-0.498664	-0.319962	-0.275033	XM_238063	Ibrdc1_predicted	PREDICTED: Rattus norvegicus IBR domain containing 1 (predicted) (Ibrdc1_predicted), mRNA [XM_238063]	XM_238063	FALSE
A_44_P352104	0.0256092	0.00105504	0.00128067	-0.151321	-1.07515	-0.22412	-1.41129	ENSRNOT00000025758	Slc25a17_predicted	PREDICTED: Rattus norvegicus solute carrier family 25 (mitochondrial carrier, peroxisomal membrane protein), member 17 (predicted) (Slc25a17_predicted), mRNA [XM_216993]		FALSE
A_44_P323404	0.0290136	0.00163399	-0.32908	-0.777102	-1.16613	-0.801291	-0.823832	NM_013166	Cntf	Rattus norvegicus ciliary neurotrophic factor (Cntf), mRNA [NM_013166]	NM_013166	FALSE
A_44_P645135	0.0417152	0.00447697	-0.667961	-1.10793	-1.15942	0.0192511	0.0392237	ENSRNOT00000003832	RGD1565486_predicted	PREDICTED: Rattus norvegicus similar to RNA binding motif protein 25 (predicted) (RGD1565486_predicted), mRNA [XM_573045]		FALSE
A_44_P183048	0.0426998	0.00472196	-0.264738	-0.584815	-0.0711436	1.01678	0.997367	ENSRNOT00000013899	ENSRNOT00000013899	PREDICTED: Rattus norvegicus cytidine 5'-triphosphate synthase (predicted) (Ctps_predicted), mRNA [XM_233467]		FALSE
A_42_P517515	0.0474627	0.00597905	-0.0685278	0.153489	0.158976	-0.752318	-0.452937	NM_001008327	RGD1307481	Rattus norvegicus similar to RIKEN cDNA 5730536A07 (RGD1307481), mRNA [NM_001008327]	NM_001008327	FALSE
A_44_P1044934	0.0429979	0.00479687	-0.145205	0.0201504	0.192023	0.266987	0.573117	NM_001080147	Anapc5_predicted	Rattus norvegicus anaphase-promoting complex subunit 5 (predicted) (Anapc5_predicted), mRNA [NM_001080147]	NM_001080147	FALSE
A_44_P781987	0.0395407	0.00400767	-0.617483	-0.166768	-0.214735	-1.07136	-1.00838	A_44_P781987	A_44_P781987			FALSE
A_44_P175543	0.0247452	0.000927004	-0.180115	-0.203468	-0.122611	0.481685	0.678285	NM_001033699	Cox15	Rattus norvegicus COX15 homolog, cytochrome c oxidase assembly protein (yeast) (Cox15), mRNA [NM_001033699]	NM_001033699	FALSE
A_44_P356605	0.0370388	0.0033255	-0.418645	-0.908944	-1.08887	-0.192986	-0.287353	ENSRNOT00000016042	Las1l_predicted	PREDICTED: Rattus norvegicus LAS1-like (S. cerevisiae) (predicted) (Las1l_predicted), mRNA [XM_216095]		FALSE
A_44_P386375	0.0412706	0.00438773	-0.182552	-0.436626	-0.650418	-0.101364	0.003111	NM_053842	Mapk1	Rattus norvegicus mitogen activated protein kinase 1 (Mapk1), mRNA [NM_053842]	NM_053842	FALSE
A_43_P15662	0.0340245	0.00263364	-0.42086	-0.548718	-0.184327	0.324527	1.26633	XM_340999	Tfrc	PREDICTED: Rattus norvegicus transferrin receptor (Tfrc), mRNA [XM_340999]	XM_340999	FALSE
A_44_P1016730	0.0203907	0.000390364	-0.369441	-0.501921	-0.622867	-0.930255	-0.87478	AI169598	AI169598	EST215483 Normalized rat kidney, Bento Soares Rattus sp. cDNA clone RKIBV07 3' end, mRNA sequence [AI169598]	AI169598	FALSE
A_44_P342568	0.0374728	0.00340882	0.488746	0.0198389	0.292263	0.738126	0.902022	XM_228999	XM_228999	Rattus norvegicus similar to glyceraldehyde-3-phosphate dehydrogenase (phosphorylating) (EC 1.2.1.12) - mouse (LOC302722), mRNA [XM_228999]	XM_228999	FALSE
A_44_P669215	0.0395407	0.00401192	0.15538	-0.0150773	-0.170542	-1.16996	-1.1845	TC598511	TC598511			FALSE
A_44_P456985	0.033863	0.00259165	1.39794	0.460447	0.0639229	1.46773	1.63938	XM_223446	XM_223446	Rattus norvegicus similar to DNA methyltransferase 3A (LOC289651), mRNA [XM_223446]	XM_223446	FALSE
A_44_P100009	0.0187873	0.000251781	0.271066	-0.0229617	0.199316	0.829744	1.07118	ENSRNOT00000026785	Diap1_predicted	Rattus norvegicus similar to p140mDia (LOC307483), mRNA [XM_226014]		FALSE
A_42_P805088	0.0346132	0.00278916	-0.647333	-0.279854	-0.490471	-1.38365	-1.23954	XM_001065720	LOC685909	PREDICTED: Rattus norvegicus similar to H2A histone family, member V isoform 1 (LOC685909), mRNA [XM_001065720]	XM_001065720	FALSE
A_44_P150594	0.0256092	0.00105852	0.100233	-0.144241	-0.0385653	0.841587	0.942008	NM_030989	Tp53	Rattus norvegicus tumor protein p53 (Tp53), mRNA [NM_030989]	NM_030989	FALSE
A_44_P1006056	0.0372136	0.00335932	0.447392	-0.153974	-1.4101	0.5044	0.51237	ENSRNOT00000028569	ENSRNOT00000028569			FALSE
A_44_P222122	0.0263791	0.00117727	0.0646654	-0.273727	-0.245197	0.507978	0.734757	NM_053648	Bcmo1	Rattus norvegicus beta-carotene 15,15'-monooxygenase (Bcmo1), mRNA [NM_053648]	NM_053648	FALSE
A_44_P411362	0.018484	0.000210936	0.015726	-0.610773	-1.26972	0.477283	0.137059	NM_001039026	Rbaf600	Rattus norvegicus ZUBR1 (Rbaf600), mRNA [NM_001039026]	NM_001039026	FALSE
A_44_P423992	0.0435541	0.00497432	0.0757967	0.259692	-0.116166	-0.126708	-0.0820243	ENSRNOT00000020651	ENSRNOT00000020651	APOBEC-1 protein (Fragment). [Source:Uniprot/SPTREMBL;Acc:Q9WUX2] [ENSRNOT00000020651]		FALSE
A_44_P511571	0.0479793	0.00613093	0.129678	-0.22274	-0.264103	0.346751	0.418198	XM_223399	RGD1562438_predicted	PREDICTED: Rattus norvegicus similar to amyloid beta (A4) precursor protein-binding, family B, member 2 (predicted) (RGD1562438_predicted), mRNA [XM_223399]	XM_223399	FALSE
A_43_P16492	0.029831	0.00178401	0.0725983	-0.452004	-0.324304	0.257504	0.479382	NM_001044275	LOC679532	Rattus norvegicus similar to Elongation of very long chain fatty acids protein 1 (LOC679532), mRNA [NM_001044275]	NM_001044275	FALSE
A_44_P513438	0.0203907	0.000383421	0.787297	0.0871821	-0.292893	0.917066	1.34599	NM_001014239	LOC364637	Rattus norvegicus similar to F-box only protein 25 (LOC364637), mRNA [NM_001014239]	NM_001014239	FALSE
A_44_P419379	0.0359419	0.00309739	0.560261	-0.374089	-0.627044	0.683979	0.538722	ENSRNOT00000028176	Snrp70_predicted	PREDICTED: Rattus norvegicus U1 small nuclear ribonucleoprotein polypeptide A (predicted) (Snrp70_predicted), mRNA [XM_341857]		FALSE
A_44_P435739	0.0292538	0.00168631	0.233801	-0.197819	0.228625	1.17341	1.47513	NM_024360	Hes1	Rattus norvegicus hairy and enhancer of split 1 (Drosophila) (Hes1), mRNA [NM_024360]	NM_024360	FALSE
A_42_P617230	0.0256092	0.00103533	-0.220026	-0.38075	-0.453476	0.0270289	0.157818	NM_001025563	Pus1	Rattus norvegicus pseudouridine synthase 1 (Pus1), mRNA [NM_001025563]	NM_001025563	FALSE
A_44_P477047	0.0218218	0.000577251	-0.106107	-0.934655	-1.06869	0.731847	0.778056	NM_171983	Spna2	Rattus norvegicus alpha-spectrin 2 (Spna2), mRNA [NM_171983]	NM_171983	FALSE
A_44_P547045	0.0216274	0.000560547	-0.129681	-0.77977	-1.55207	0.156543	0.634127	ENSRNOT00000010241	Herc3_predicted	PREDICTED: Rattus norvegicus hect domain and RLD 3 (predicted) (Herc3_predicted), mRNA [XM_342701]		FALSE
A_44_P510401	0.0260682	0.00111393	0.428114	-0.000146389	-0.116596	0.665049	0.651557	ENSRNOT00000031097	RGD1310147_predicted	PREDICTED: Rattus norvegicus similar to TBC1 domain family, member 8; BUB2-like protein 1; vascular Rab-GAP [XM_340793]		FALSE
A_44_P509014	0.0203907	0.000402874	0.0543624	-0.374521	-0.922838	0.434909	-0.757504	A_44_P509014	A_44_P509014			FALSE
AT_W_M	0.0275062	0.00136062	-0.58525	-1.07545	-1.38404	-0.554355	0.109908	AT_W_M	AT_W_M			pos
A_42_P674856	0.0424942	0.00467127	-0.21353	-0.55813	-0.900696	-0.207345	-0.783935	NM_001013149	Mesdc1	Rattus norvegicus mesoderm development candidate 1 (Mesdc1), mRNA [NM_001013149]	NM_001013149	FALSE
A_44_P116697	0.0256092	0.00103647	-0.127148	-0.607835	-0.898557	0.550897	0.472316	ENSRNOT00000056656	Golga3_predicted	similar to male-enhanced antigen-2 (predicted) (RGD1565361_predicted), mRNA [Source:RefSeq_dna;Acc:XR_008591] [ENSRNOT00000000865]		FALSE
A_44_P187080	0.038746	0.00378645	-0.564878	-0.993799	-1.32695	-0.141922	0.0223289	NM_017290	Atp2a2	Rattus norvegicus ATPase, Ca++ transporting, cardiac muscle, slow twitch 2 (Atp2a2), mRNA [NM_017290]	NM_017290	FALSE
A_42_P516561	0.0378161	0.0035012	0.395333	-0.101373	-0.0658973	1.23747	1.3267	NM_017228	Atn1	Rattus norvegicus atrophin 1 (Atn1), mRNA [NM_017228]	NM_017228	FALSE
A_44_P486071	0.0187873	0.000245143	-0.330699	-0.506336	-0.867989	-1.07212	-1.13279	XM_228689	Cul4b_predicted	PREDICTED: Rattus norvegicus cullin 4B (predicted) (Cul4b_predicted), mRNA [XM_228689]	XM_228689	FALSE
A_44_P392334	0.0339812	0.00262105	-0.281059	-0.408396	-0.642204	0.0213753	0.0718974	NM_080907	Ppp4r1	Rattus norvegicus protein phosphatase 4, regulatory subunit 1 (Ppp4r1), mRNA [NM_080907]	NM_080907	FALSE
A_44_P187083	0.0207852	0.000479267	-0.72455	-1.07718	-1.33605	-0.0482153	0.231346	NM_017290	Atp2a2	Rattus norvegicus ATPase, Ca++ transporting, cardiac muscle, slow twitch 2 (Atp2a2), mRNA [NM_017290]	NM_017290	FALSE
A_43_P17415	0.0263791	0.00117364	0.0229545	-1.2338	-0.60031	1.44891	1.1691	NM_198760	Slc16a6	Rattus norvegicus solute carrier family 16 (monocarboxylic acid transporters), member 6 (Slc16a6), mRNA [NM_198760]	NM_198760	FALSE
A_44_P180645	0.0274974	0.00135278	-0.00692296	-0.302915	-0.34123	0.593176	1.0185	ENSRNOT00000029228	Usp24_predicted	Rattus norvegicus similar to Ubiquitin carboxyl-terminal hydrolase 24 (Ubiquitin thiolesterase 24) (Ubiquitin-specific processing protease 24) (Deubiquitinating enzyme 24) (LOC313427), mRNA [XM_233260]		FALSE
A_43_P16715	0.0473085	0.0059358	0.0462278	-0.467145	-0.917808	0.0372254	-0.355509	NM_001024903	Sertad2	Rattus norvegicus SERTA domain containing 2 (Sertad2), mRNA [NM_001024903]	NM_001024903	FALSE
A_43_P17262	0.0292955	0.00169553	0.129603	0.754803	0.963344	0.0669444	0.100811	XM_215641	Tmod4_predicted	PREDICTED: Rattus norvegicus tropomodulin 4 (predicted) (Tmod4_predicted), mRNA [XM_215641]	XM_215641	FALSE
A_44_P195306	0.0493829	0.00649712	0.0857733	-0.0252743	-0.15945	0.145178	0.365027	NM_019377	Ywhab	Rattus norvegicus tyrosine 3-monooxygenase/tryptophan 5-monooxygenase activation protein, beta polypeptide (Ywhab), mRNA [NM_019377]	NM_019377	FALSE
A_44_P131470	0.023831	0.000828734	-0.0504984	-0.0469425	-0.254964	-0.975302	-0.787219	NM_001011946	Hexb	Rattus norvegicus hexosaminidase B (Hexb), mRNA [NM_001011946]	NM_001011946	FALSE
A_44_P286024	0.0231147	0.000750437	-0.179553	-0.437201	-0.430912	0.161522	0.207119	XM_214002	LOC289471	PREDICTED: Rattus norvegicus similar to DNA helicase HEL308 (LOC289471), mRNA [XM_214002]	XM_214002	FALSE
A_44_P370798	0.0486422	0.00634242	0.211011	0.0954561	-0.302937	0.447315	0.742519	XM_343271	XM_343271	Rattus norvegicus similar to leucine-rich repeat-containing F-box protein FBL6 (LOC362941), mRNA [XM_343271]	XM_343271	FALSE
A_44_P841373	0.0206599	0.000455072	0.0252373	-0.229679	-0.397271	0.510036	0.53502	TC622719	TC622719			FALSE
A_44_P395522	0.0276957	0.00140162	0.300285	0.87372	1.74246	-0.173608	-0.135343	NM_182842	Camk1g	Rattus norvegicus calcium/calmodulin-dependent protein kinase I gamma (Camk1g), mRNA [NM_182842]	NM_182842	FALSE
A_44_P768645	0.0398696	0.0040866	0.139862	0.684515	0.611267	-1.61811	-2.21095	TC608534	TC608534			FALSE
A_44_P680056	0.0301	0.00184908	-0.157353	-0.600834	-1.36621	0.554917	0.700431	ENSRNOT00000051859	Ap1g1	Gamma-adaptin (Fragment). [Source:Uniprot/SPTREMBL;Acc:Q8R525] [ENSRNOT00000051859]		FALSE
A_44_P456958	0.0182041	0.000142963	1.0056	0.310939	-0.195587	1.62396	1.94343	ENSRNOT00000004905	Prox1_predicted	PREDICTED: Rattus norvegicus prospero-related homeobox 1 (predicted) (Prox1_predicted), mRNA [XM_223067]		FALSE
A_44_P817539	0.0263791	0.00114513	-0.166729	-0.474084	-1.03554	-0.214706	-0.179368	NM_001012185	Gpiap1	Rattus norvegicus GPI-anchored membrane protein 1 (Gpiap1), mRNA [NM_001012185]	NM_001012185	FALSE
A_44_P148383	0.0393157	0.00393214	0.336265	-0.183513	-0.988475	-0.83155	-1.37185	XR_007587	RGD1564952_predicted	PREDICTED: Rattus norvegicus similar to zinc finger, RAN-binding domain containing 3 (predicted) (RGD1564952_predicted), mRNA [XR_007587]	XR_007587	FALSE
A_44_P529939	0.0303533	0.00189233	-0.300519	-0.859531	-1.29744	-0.656402	-0.851461	XM_215883	Kif3b_predicted	PREDICTED: Rattus norvegicus kinesin family member 3B (predicted) (Kif3b_predicted), mRNA [XM_215883]	XM_215883	FALSE
A_44_P448108	0.0385516	0.00371111	0.137448	-0.316725	-0.5388	0.520972	0.579632	ENSRNOT00000021197	Ube4b_predicted	PREDICTED: Rattus norvegicus similar to ubiquitin fusion degradation protein 2 (predicted) (RGD1562201_predicted), mRNA [XM_346328]		FALSE
A_44_P506313	0.0391508	0.0038775	-0.0177374	-0.525094	-1.24378	0.0120417	0.281881	ENSRNOT00000019862	Iars_predicted	Iars_predicted protein (Fragment). [Source:Uniprot/SPTREMBL;Acc:Q5BJR3] [ENSRNOT00000019862]		FALSE
A_43_P22157	0.0414117	0.00442104	-0.0152037	0.37214	0.788732	-0.0187477	-0.0539517	NM_001037139	Pcdhga2	Rattus norvegicus protocadherin gamma a2 (Pcdhga2), mRNA [NM_001037139]	NM_001037139	FALSE
A_44_P852754	0.0351889	0.0029046	-0.575605	-0.961348	-0.971908	0.164966	0.363676	TC576606	TC576606	Q6AY36_RAT (Q6AY36) Coronin, actin binding protein 2A (Predicted), complete [TC576606]		FALSE
A_43_P19342	0.0324907	0.00228877	0.298868	-0.121713	-0.155955	1.29768	1.30846	ENSRNOT00000000161	Mast2_predicted	Rattus norvegicus similar to protein kinase (LOC313819), mRNA [XM_233782]		FALSE
A_44_P137194	0.0303533	0.00190099	0.573672	0.924045	0.847183	-0.191657	-0.149967	AA900990	AA900990	AA900990 UI-R-E0-dj-f-04-0-UI.s1 UI-R-E0 Rattus norvegicus cDNA clone UI-R-E0-dj-f-04-0-UI 3' similar to gi [AA900990]	AA900990	FALSE
A_44_P536400	0.0219338	0.00059731	0.206155	-0.333069	-0.347426	0.71757	0.800392	XM_342024	XM_342024	Rattus norvegicus similar to DNA damage binding protein 1 (Damage-specific DNA binding protein 1) (DDB p127 subunit) (DDBa) (UV-damaged DNA-binding protein 1) (UV-DDB 1) (Xeroderma pigmentosum group E complementing protein) (XPCe) (X-associated...	XM_342024	FALSE
A_42_P511274	0.0393332	0.00394347	0.616477	0.499009	-0.00486982	0.36437	0.253975	NM_001008843	RT1-CE5	Rattus norvegicus RT1 class I, CE5 (RT1-CE5), transcript variant 1, mRNA [NM_001008843]	NM_001008843	FALSE
A_44_P173365	0.0465606	0.00571168	0.0917015	-0.290466	-1.55509	0.290544	0.46323	ENSRNOT00000010334	Tnpo3	PREDICTED: Rattus norvegicus transportin 3 (Tnpo3), mRNA [XM_216112]		FALSE
A_44_P1054883	0.018484	0.000220947	-0.320971	-0.783941	-0.947581	0.744503	0.88491	AY011335	AY011335	Rattus norvegicus amyloid beta precursor protein (App) gene, partial cds [AY011335]	AY011335	FALSE
A_44_P1031034	0.031494	0.00209245	-0.116316	-0.620528	-0.513734	0.752906	0.731655	NM_031745	Rsn	Rattus norvegicus restin (Reed-Steinberg cell-expressed intermediate filament-associated protein) (Rsn), mRNA [NM_031745]	NM_031745	FALSE
A_44_P314081	0.0256092	0.0010592	0.45427	-0.00393456	-1.08213	0.727755	0.81898	ENSRNOT00000014546	Sptlc1_predicted	PREDICTED: Rattus norvegicus serine palmitoyltransferase, long chain base subunit 1 (predicted) (Sptlc1_predicted), mRNA [XM_341495]		FALSE
A_44_P1071405	0.0187873	0.000244884	-0.207549	-0.568001	-1.06464	0.220105	0.513485	XM_241375	Narg1_predicted	PREDICTED: Rattus norvegicus NMDA receptor-regulated gene 1 (predicted) (Narg1_predicted), mRNA [XM_241375]	XM_241375	FALSE
A_44_P541187	0.0276957	0.00140412	-0.0111843	-0.497056	-0.540936	0.324123	0.555822	ENSRNOT00000017914	Tpcn2_predicted	PREDICTED: Rattus norvegicus two pore segment channel 2 (predicted) (Tpcn2_predicted), mRNA [XM_219555]		FALSE
A_44_P902209	0.0277596	0.00141404	-0.0560893	-0.490498	-0.761079	-0.149868	-0.102842	NM_016990	Add1	Rattus norvegicus adducin 1 (alpha) (Add1), mRNA [NM_016990]	NM_016990	FALSE
A_42_P830713	0.0394778	0.00399452	-0.547819	-0.885527	-1.33345	-0.252875	-0.63332	ENSRNOT00000011864	ENSRNOT00000011864	Rattus norvegicus similar to WD repeat domain 11 protein (LOC315843), mRNA [XM_236438]		FALSE
A_44_P319104	0.0222445	0.0006772	0.325584	0.135864	0.353408	0.669823	0.894884	NM_001039016	Zdhhc9	Rattus norvegicus zinc finger, DHHC domain containing 9 (Zdhhc9), mRNA [NM_001039016]	NM_001039016	FALSE
A_44_P434428	0.0387182	0.00377619	0.0260559	0.167234	0.20516	-0.537357	-0.137569	BF395191	BF395191	BF395191 UI-R-CM0-bjj-h-09-0-UI.s1 UI-R-CM0 Rattus norvegicus cDNA clone UI-R-CM0-bjj-h-09-0-UI 3', mRNA sequence [BF395191]	BF395191	FALSE
A_44_P929512	0.0434233	0.00489509	-0.329978	-0.707757	-1.01825	-0.106998	-0.09665	XM_573762	Chd8	PREDICTED: Rattus norvegicus chromodomain helicase DNA binding protein 8 (Chd8), mRNA [XM_573762]	XM_573762	FALSE
A_44_P490004	0.0322433	0.00220034	0.783191	0.256313	-0.355674	0.798618	1.10272	NM_001013073	Btbd9	Rattus norvegicus BTB (POZ) domain containing 9 (Btbd9), mRNA [NM_001013073]	NM_001013073	FALSE
A_44_P776069	0.0183556	0.000154512	-0.289022	-0.965638	-1.36951	-0.897301	-0.760577	ENSRNOT00000014541	RGD1311559_predicted	PREDICTED: Rattus norvegicus hypothetical LOC315055 (predicted) (RGD1311559_predicted), mRNA [XM_235398]		FALSE
A_44_P199524	0.0247452	0.000925079	-0.564884	-0.816121	-1.1402	-0.384447	-0.156986	XM_001074879	LOC690586	PREDICTED: Rattus norvegicus similar to ankyrin repeat domain 40 (LOC690586), mRNA [XM_001074879]	XM_001074879	FALSE
A_44_P407722	0.0454024	0.00541237	-0.0638651	-0.216227	-0.509006	-0.549573	-0.277943	XR_008573	RGD1565495_predicted	PREDICTED: Rattus norvegicus similar to retinoblastoma binding protein 7 (predicted) (RGD1565495_predicted), mRNA [XR_008573]	XR_008573	FALSE
A_44_P578553	0.039234	0.00389722	-0.242568	-0.543585	-1.11264	-1.18586	-1.33099	TC634848	TC634848	CM003_MOUSE (Q8C263) Protein C13orf3 homolog, partial (17%) [TC634848]		FALSE
A_44_P106598	0.0258853	0.00108827	0.131768	-0.203031	-0.145777	0.716426	0.674843	NM_001017451	RGD1309228	Rattus norvegicus similar to putative protein, with at least 9 transmembrane domains, of eukaryotic origin (43.9 kD) (2G415) (RGD1309228), mRNA [NM_001017451]	NM_001017451	FALSE
A_44_P319349	0.0290421	0.00164857	0.0363666	-0.334918	-1.17462	0.710613	0.829599	ENSRNOT00000002498	Pkp2	Pkp2 protein (Fragment). [Source:Uniprot/SPTREMBL;Acc:Q562C0] [ENSRNOT00000002498]		FALSE
A_44_P828941	0.0182041	0.000131319	0.540135	-0.044164	-0.744048	1.42857	1.65699	TC596530	TC596530			FALSE
A_44_P110606	0.0187873	0.000243827	0.0371712	-0.477863	-0.89463	-0.348971	-0.0653248	ENSRNOT00000026827	Dus2l_predicted	PREDICTED: Rattus norvegicus dihydrouridine synthase 2-like, SMM1 homolog (S. cerevisiae) (predicted) (Dus2l_predicted), mRNA [XM_214665]		FALSE
A_43_P17260	0.0290136	0.00163406	-0.0118635	-0.0146041	-0.260322	-1.64682	-1.71829	NM_001014172	Rsrc1	Rattus norvegicus arginine/serine-rich coiled-coil 1 (Rsrc1), mRNA [NM_001014172]	NM_001014172	FALSE
A_44_P337879	0.0486505	0.00634706	0.124639	0.0945513	0.0861076	0.94782	0.728765	ENSRNOT00000031808	RGD1565685_predicted	PREDICTED: Rattus norvegicus similar to RIKEN cDNA 1810030O07 (predicted) (RGD1565685_predicted), mRNA [XM_228714]		FALSE
A_44_P383740	0.0221841	0.000636395	-0.199819	-0.581046	-0.95287	0.0220366	0.330271	AI229819	AI229819	EST226514 Normalized rat embryo, Bento Soares Rattus sp. cDNA clone REMCN02 3' end, mRNA sequence [AI229819]	AI229819	FALSE
A_42_P715836	0.0208809	0.000489296	0.227515	-0.68116	-0.811053	0.413967	0.932033	NM_021676	Shank3	Rattus norvegicus SH3/ankyrin domain gene 3 (Shank3), mRNA [NM_021676]	NM_021676	FALSE
A_44_P546372	0.0493829	0.00649171	-0.0664879	0.317141	0.372432	-0.552535	-0.324853	XM_001053597	LOC679586	PREDICTED: Rattus norvegicus similar to ATP synthase, H+ transporting, mitochondrial F0 complex, subunit G (LOC679586), mRNA [XM_001053597]	XM_001053597	FALSE
A_44_P941895	0.0222712	0.00068787	-0.163054	-0.226548	-0.256013	-0.861852	-0.722893	ENSRNOT00000018369	Prosc_predicted	PREDICTED: Rattus norvegicus proline synthetase co-transcribed (predicted) (Prosc_predicted), mRNA [XM_224947]		FALSE
A_44_P156922	0.0351889	0.00290569	-0.179967	-0.350268	-0.61615	-0.219826	-0.0899802	NM_001008312	Serinc3	Rattus norvegicus serine incorporator 3 (Serinc3), mRNA [NM_001008312]	NM_001008312	FALSE
A_44_P835425	0.0314978	0.00209469	-0.555692	-0.845656	-1.20886	-0.17232	-0.113994	XM_226388	Otud4	PREDICTED: Rattus norvegicus OTU domain containing 4 (Otud4), mRNA [XM_226388]	XM_226388	FALSE
A_44_P516818	0.0260682	0.00111591	-0.0572184	-0.483322	-0.794419	0.674705	0.815898	ENSRNOT00000004068	ENSRNOT00000004068	Serologically defined breast cancer antigen NY-BR-16-like protein (Fragment). [Source:Uniprot/SPTREMBL;Acc:Q99MD2] [ENSRNOT00000004068]		FALSE
A_43_P17071	0.0345179	0.00276621	-0.0244176	-0.313653	-0.61523	0.0780352	0.172607	XM_231161	Gapvd1_predicted	PREDICTED: Rattus norvegicus GTPase activating protein and VPS9 domains 1 (predicted) (Gapvd1_predicted), mRNA [XM_231161]	XM_231161	FALSE
A_44_P361041	0.0196408	0.000300603	0.242631	0.506296	0.643785	-0.205425	-0.0881258	ENSRNOT00000041225	ENSRNOT00000041225	similar to UDP-N-acetyl-alpha-D-galactosamine:polypeptide N-acetylgalactosaminyltransferase 12 (LOC685818), mRNA [Source:RefSeq_dna;Acc:XR_006303] [ENSRNOT00000041225]		FALSE
A_43_P13018	0.0417901	0.00448924	-0.23482	-0.671748	-0.931321	-0.315518	-0.361245	NM_054004	Cand1	Rattus norvegicus cullin associated and neddylation disassociated 1 (Cand1), mRNA [NM_054004]	NM_054004	FALSE
A_44_P241479	0.025783	0.00107644	0.320676	0.0309111	0.28528	1.28788	1.42754	NM_199412	Cbara1	Rattus norvegicus calcium binding atopy-related autoantigen 1 (Cbara1), mRNA [NM_199412]	NM_199412	FALSE
A_44_P441833	0.028084	0.00146732	0.107022	-0.346578	-0.0688748	1.25201	1.1963	AI009003	AI009003	AI009003 EST203454 Normalized rat embryo, Bento Soares Rattus sp. cDNA clone REMBH04 3' end, mRNA sequence [AI009003]	AI009003	FALSE
A_44_P914945	0.0348644	0.00283644	-0.303269	-0.578145	-1.37136	-0.24685	0.0017097	TC599847	TC599847	AE007952 AGR_C_159p {Agrobacterium tumefaciens str. C58} (exp=0; wgp=1; cg=0), partial (7%) [TC599847]		FALSE
A_42_P480082	0.0278556	0.00142452	-0.183412	-0.747768	-1.13944	-0.197517	-0.284556	NM_022596	Golga2	Rattus norvegicus cis-Golgi matrix protein GM130 (Golga2), mRNA [NM_022596]	NM_022596	FALSE
A_44_P998500	0.0268416	0.00125027	0.366696	-0.0891343	-0.301649	-1.29988	-1.27421	XM_213320	XM_213320	Rattus norvegicus similar to RIKEN cDNA 4930449E07 (LOC287371), mRNA [XM_213320]	XM_213320	FALSE
A_44_P303393	0.0362111	0.00316091	-0.27259	-0.257201	-0.360806	-0.817227	-0.953904	ENSRNOT00000009009	Dnajc9_predicted	PREDICTED: Rattus norvegicus DnaJ (Hsp40) homolog, subfamily C, member 9 (predicted) (Dnajc9_predicted), mRNA [XM_344286]		FALSE
A_44_P372484	0.0204717	0.000428841	0.104223	-0.225893	-0.447882	0.146789	0.273498	U75399	U75399	Rattus norvegicus coatomer beta subunit mRNA, partial cds and 5' untranslated sequence. [U75399]	U75399	FALSE
A_43_P16552	0.0469221	0.00582904	-0.218439	-0.500364	-1.0468	-0.640565	-0.778776	NM_001005553	Git2	Rattus norvegicus G protein-coupled receptor kinase-interactor 2 (Git2), mRNA [NM_001005553]	NM_001005553	FALSE
A_44_P499076	0.0340245	0.00264545	0.72056	-0.0758507	-0.216243	0.520847	0.457996	A_44_P499076	A_44_P499076			FALSE
A_42_P700288	0.0431864	0.00483682	-0.000380635	-0.356206	-0.681293	0.173722	-0.120065	ENSRNOT00000010887	ENSRNOT00000010887	PREDICTED: Rattus norvegicus similar to Tripartite motif protein 47 (LOC690374), mRNA [XM_221124]		FALSE
A_44_P318662	0.0182041	0.000118054	-0.469743	0.526334	0.468431	-0.32394	-0.214831	NM_019162	Tac2	Rattus norvegicus tachykinin 2 (Tac2), mRNA [NM_019162]	NM_019162	FALSE
A_44_P362889	0.0222712	0.000683129	-0.476152	-0.06163	-0.218057	-1.26655	-0.951543	ENSRNOT00000061493	Ndufa1_predicted	AGENCOURT_11526153 NICHD_Rr_Pit1 Rattus norvegicus cDNA clone IMAGE:6887929 5', mRNA sequence [CB315755]		FALSE
A_44_P355059	0.0196408	0.000304842	-0.33816	-0.172188	-0.747852	-1.09566	-1.07747	AA819118	AA819118	AA819118 UI-R-A0-ba-a-08-0-UI.s1 UI-R-A0 Rattus norvegicus cDNA clone UI-R-A0-ba-a-08-0-UI 3' similar to emb [AA819118]	AA819118	FALSE
A_42_P538084	0.0332498	0.00241648	0.0103046	-0.617913	-1.34419	-0.274478	-0.486792	ENSRNOT00000005983	Crim1_predicted	PREDICTED: Rattus norvegicus cysteine-rich motor neuron 1 (predicted) (Crim1_predicted), mRNA [XM_233798]		FALSE
A_44_P445938	0.0385516	0.00370847	-0.191095	-0.840475	-1.18408	-0.347227	-0.322656	XM_340798	P4ha2_predicted	PREDICTED: Rattus norvegicus procollagen-proline, 2-oxoglutarate 4-dioxygenase (proline 4-hydroxylase), alpha II polypeptide (predicted) (P4ha2_predicted), mRNA [XM_340798]	XM_340798	FALSE
A_44_P339202	0.043006	0.00480615	-0.00131357	-0.272343	-0.58334	0.12931	0.173208	ENSRNOT00000032627	LOC499076	PREDICTED: Rattus norvegicus similar to protein phosphatase 1, regulatory subunit 12C (LOC499076), mRNA [XM_574359]		FALSE
A_44_P236025	0.0252748	0.0009752	-0.204867	0.210852	0.216412	0.244846	0.400055	NM_001002278	Pofut1	Rattus norvegicus protein O-fucosyltransferase 1 (Pofut1), mRNA [NM_001002278]	NM_001002278	FALSE
A_44_P486246	0.0323972	0.00227113	-0.138515	-0.317668	-1.04247	-0.537088	-0.748623	AW916189	AW916189	AW916189 EST347493 Rat gene index, normalized rat, norvegicus, Bento Soares Rattus norvegicus cDNA clone RGIDJ20 5' end, mRNA sequence [AW916189]	AW916189	FALSE
A_44_P464042	0.0346132	0.00279745	-0.356043	-0.416632	-1.07246	0.326001	0.380761	ENSRNOT00000037588	RGD1304646_predicted	PREDICTED: Rattus norvegicus similar to mitotic control protein dis3 homolog (predicted) (RGD1304646_predicted), mRNA [XM_224449]		FALSE
A_44_P419746	0.0307666	0.00195448	-0.295993	-0.531858	-1.4729	-0.236338	-0.57341	XM_343664	LOC363326	PREDICTED: Rattus norvegicus hypothetical LOC363326 (LOC363326), mRNA [XM_343664]	XM_343664	FALSE
A_44_P160401	0.0203907	0.000384718	-0.28926	-0.0979243	-0.169052	-1.20825	-1.25057	AA900187	AA900187	AA900187 UI-R-A0-bh-g-03-0-UI.s4 UI-R-A0 Rattus norvegicus cDNA clone UI-R-A0-bh-g-03-0-UI 3' similar to gi [AA900187]	AA900187	FALSE
A_44_P222292	0.036293	0.00317544	0.25501	0.0290608	0.1536	0.531291	0.705021	NM_177930	Vac14	Rattus norvegicus Vac14 homolog (S. cerevisiae) (Vac14), mRNA [NM_177930]	NM_177930	FALSE
A_44_P466474	0.0203907	0.000414135	-0.391304	-0.650528	-0.885662	-0.229838	0.263474	XR_007380	LOC291205	PREDICTED: Rattus norvegicus similar to 60 kDa heat shock protein, mitochondrial precursor (Hsp60) (60 kDa chaperonin) (CPN60) (Heat shock protein 60) (HSP-60) (Mitochondrial matrix protein P1) (HSP-65) (LOC291205), mRNA [XR_007380]	XR_007380	FALSE
A_44_P191924	0.0274974	0.00135699	0.421118	-0.348113	-0.286737	0.861815	1.09302	NM_019906	Frap1	Rattus norvegicus FK506 binding protein 12-rapamycin associated protein 1 (Frap1), mRNA [NM_019906]	NM_019906	FALSE
A_44_P764252	0.0303533	0.00189876	0.828918	0.246031	0.0857825	0.667849	1.40405	TC573730	TC573730	RNU78105 latrophilin-1 precursor {Rattus norvegicus} (exp=-1; wgp=0; cg=0), complete [TC573730]		FALSE
A_44_P266803	0.0455801	0.00545259	0.124232	-0.0719154	-0.0903109	0.304405	0.575851	NM_053998	Rab8a	Rattus norvegicus RAB8A, member RAS oncogene family (Rab8a), mRNA [NM_053998]	NM_053998	FALSE
A_44_P535692	0.0410498	0.00433556	-0.167122	0.191524	0.463439	-0.455243	-0.32574	CV797630	RGD1561459_predicted	UI-R-EP0-coa-k-22-0-UI.s1 UI-R-EP0 Rattus norvegicus cDNA clone UI-R-EP0-coa-k-22-0-UI 3', mRNA sequence [CV797630]	CV797630	FALSE
A_43_P20191	0.0270761	0.00128101	0.10455	-0.123359	-0.202202	0.739763	0.783958	ENSRNOT00000012701	Pgm3_predicted	Rattus norvegicus similar to Phosphoacetylglucosamine mutase (PAGM) (Acetylglucosamine phosphomutase) (N-acetylglucosamine-phosphate mutase) (Phosphoglucomutase 3) (LOC363109), mRNA [XM_343442]		FALSE
A_42_P780097	0.0278761	0.00143524	-0.403338	-0.580521	-0.770231	0.273809	0.346005	NM_001008280	Lrrc59	Rattus norvegicus leucine rich repeat containing 59 (Lrrc59), mRNA [NM_001008280]	NM_001008280	FALSE
A_44_P466507	0.0440034	0.00507196	-0.496838	-1.06674	-1.68149	0.134656	0.409792	NM_001077672	Cstf3_predicted	Rattus norvegicus cleavage stimulation factor, 3' pre-RNA, subunit 3 (predicted) (Cstf3_predicted), mRNA [NM_001077672]	NM_001077672	FALSE
A_44_P480865	0.0293312	0.00170326	0.437803	0.559592	0.334378	-0.245895	-0.046144	ENSRNOT00000017318	Nudt16_predicted	PREDICTED: Rattus norvegicus nudix (nucleoside diphosphate linked moiety X)-type motif 16 (predicted) (Nudt16_predicted), mRNA [XM_343464]		FALSE
A_44_P1071120	0.0360251	0.0031336	-0.160323	0.395984	0.592477	-0.665078	-0.647802	ENSRNOT00000046889	ENSRNOT00000046889	Voltage-dependent L-type calcium channel subunit alpha-1D (Voltage- gated calcium channel subunit alpha Cav1.3) (Calcium channel, L type, alpha-1 polypeptide, isoform 2) (RAT brain class D) (RBD). [Source:Uniprot/SWISSPROT;Acc:P27732]...		FALSE
A_44_P490231	0.018484	0.000200696	0.399551	-0.0441881	-0.36308	0.550889	0.574431	ENSRNOT00000020516	RGD1561662_predicted	Rattus norvegicus similar to hypothetical protein BC006605 (LOC301232), mRNA [XM_236949]		FALSE
A_44_P201603	0.0286928	0.00158661	-0.0459796	-0.517637	-1.06064	-0.216375	-0.241214	ENSRNOT00000015152	Hnrpa2b1_predicted	similar to heterogeneous nuclear ribonucleoprotein A2/B1 isoform 2 (LOC499894), mRNA [Source:RefSeq_dna;Acc:XR_005959] [ENSRNOT00000015152]		FALSE
A_42_P797295	0.0256092	0.00102049	0.381923	0.0528047	0.284254	1.60216	1.56736	NM_001034927	Sulf2	Rattus norvegicus sulfatase 2 (Sulf2), mRNA [NM_001034927]	NM_001034927	FALSE
A_44_P639519	0.0389079	0.00382502	-0.584253	-0.984074	-2.1364	-0.416528	-0.587266	TC608711	TC608711	Q4S3M0_TETNG (Q4S3M0) Chromosome 1 SCAF14749, whole genome shotgun sequence. (Fragment), partial (4%) [TC608711]		FALSE
A_44_P361424	0.030824	0.00196864	0.506287	0.0772254	0.299149	0.739093	1.01739	XR_005771	LOC299727	PREDICTED: Rattus norvegicus similar to glyceraldehyde-3-phosphate dehydrogenase (LOC299727), mRNA [XR_005771]	XR_005771	FALSE
A_44_P327363	0.0425255	0.00468201	-0.217013	-0.147637	-0.499897	-0.957158	-0.820121	AI029954	AI029954	AI029954 UI-R-C0-ja-g-12-0-UI.s1 UI-R-C0 Rattus norvegicus cDNA clone UI-R-C0-ja-g-12-0-UI 3', mRNA sequence [AI029954]	AI029954	FALSE
A_44_P725617	0.0115275	1.01084e-05	0.00358951	-0.305322	-0.422169	0.511929	0.629252	BF548107	BF548107	BF548107 UI-R-A0-bf-b-01-0-UI.r1 UI-R-A0 Rattus norvegicus cDNA clone UI-R-A0-bf-b-01-0-UI 5', mRNA sequence [BF548107]	BF548107	FALSE
A_44_P961032	0.0354339	0.00300013	-0.0658783	0.0107921	0.293927	-0.607596	-0.40577	TC599726	TC599726			FALSE
A_44_P103692	0.038737	0.00378179	-0.160695	-0.452625	-0.630317	0.0846894	0.0574334	ENSRNOT00000034961	RGD1309059_predicted	PREDICTED: Rattus norvegicus similar to KIAA2010 protein (predicted) (RGD1309059_predicted), mRNA [XM_234484]		FALSE
A_44_P132291	0.0203907	0.000414974	0.0490719	-0.3102	-0.520298	0.556396	0.558632	ENSRNOT00000011105	Ipo9_predicted	PREDICTED: Rattus norvegicus importin 9 (predicted) (Ipo9_predicted), mRNA [XM_222661]		FALSE
A_44_P725429	0.018484	0.00022807	0.457241	0.55875	0.618696	-0.109751	-0.206176	AA946126	AA946126	AA946126 EST201625 Normalized rat lung, Bento Soares Rattus sp. cDNA clone RLUBB50 3' end, mRNA sequence [AA946126]	AA946126	FALSE
A_44_P158302	0.029831	0.00177807	0.578051	0.361341	-0.227693	-0.236006	-0.190376	NM_001025047	LOC500251	Rattus norvegicus hypothetical protein LOC500251 (LOC500251), mRNA [NM_001025047]	NM_001025047	FALSE
A_44_P424723	0.0182041	0.00012747	-0.366795	-0.712081	-1.34583	-0.207825	-0.343091	NM_021693	Snf1lk	Rattus norvegicus SNF1-like kinase (Snf1lk), mRNA [NM_021693]	NM_021693	FALSE
A_44_P304930	0.0222712	0.000684765	0.00726473	-0.73503	-0.478754	0.556381	0.538626	NM_001025742	Dazap1	Rattus norvegicus DAZ associated protein 1 (Dazap1), mRNA [NM_001025742]	NM_001025742	FALSE
A_44_P251908	0.0389381	0.00383367	0.0475261	-0.318661	0.152907	0.874976	1.32801	NM_131913	Xpnpep1	Rattus norvegicus X-prolyl aminopeptidase (aminopeptidase P) 1, soluble (Xpnpep1), mRNA [NM_131913]	NM_131913	FALSE
A_44_P293667	0.048057	0.00615959	0.284322	-0.0824273	-0.91979	0.448061	0.733287	NM_022286	Vps33b	Rattus norvegicus vacuolar protein sorting 33B (yeast) (Vps33b), mRNA [NM_022286]	NM_022286	FALSE
A_44_P349675	0.0488952	0.00640041	0.152778	-0.218709	-1.71621	0.489753	0.184534	NM_001013167	Wasf2	Rattus norvegicus WAS protein family, member 2 (Wasf2), mRNA [NM_001013167]	NM_001013167	FALSE
A_44_P1028233	0.0433636	0.00487906	0.124219	-0.23881	-0.492631	0.317848	0.30833	ENSRNOT00000015099	Anapc2	Anapc2 protein (Fragment). [Source:Uniprot/SPTREMBL;Acc:Q3B7T7] [ENSRNOT00000015099]		FALSE
A_44_P990043	0.0338452	0.00258772	-0.157127	-0.628475	-0.920573	0.493511	0.382639	ENSRNOT00000027521	Pdcd11_predicted	PREDICTED: Rattus norvegicus programmed cell death protein 11 (predicted) (Pdcd11_predicted), mRNA [XM_219966]		FALSE
A_44_P254016	0.0233161	0.000786024	0.557802	0.839394	0.822461	0.108941	0.224415	NM_016992	Avp	Rattus norvegicus arginine vasopressin (Avp), mRNA [NM_016992]	NM_016992	FALSE
A_44_P521946	0.0318839	0.00214608	-0.0737448	-0.750225	-0.912175	-0.00354707	-0.0440547	AA850244	AA850244	AA850244 EST193011 Normalized rat ovary, Bento Soares Rattus sp. cDNA clone ROVAE19 5' end, mRNA sequence [AA850244]	AA850244	FALSE
A_44_P470361	0.019622	0.000290513	0.00222147	-0.406351	-0.189312	-1.03777	-0.972886	CK363737	CK363737	AGENCOURT_17157413 NIH_MGC_231 Rattus norvegicus cDNA clone IMAGE:7096354 5', mRNA sequence [CK363737]	CK363737	FALSE
A_44_P104361	0.0359961	0.00312842	-0.154101	-0.366816	-0.318658	-0.0495157	0.32586	DY309108	DY309108	AGENCOURT_66961560 NIH_MGC_367 Rattus norvegicus cDNA clone IMAGE:8374934 5', mRNA sequence [DY309108]	DY309108	FALSE
A_44_P1007613	0.030805	0.00196381	-0.358193	-0.879329	-1.09406	-0.202836	-0.0960356	XM_220219	Abca3	PREDICTED: Rattus norvegicus ATP-binding cassette, sub-family A (ABC1), member 3 (Abca3), mRNA [XM_220219]	XM_220219	FALSE
A_42_P597638	0.0375609	0.00344351	-0.572346	-0.610136	-0.95701	-0.17758	-0.260394	NM_138907	Mte1	Rattus norvegicus mitochondrial acyl-CoA thioesterase 1 (Mte1), mRNA [NM_138907]	NM_138907	FALSE
A_44_P271769	0.0420114	0.00453126	0.517606	0.148384	-0.224433	0.182335	0.443193	NM_016988	Acp2	Rattus norvegicus acid phosphatase 2, lysosomal (Acp2), mRNA [NM_016988]	NM_016988	FALSE
A_43_P20466	0.018484	0.000177701	-0.54121	-1.05395	-1.51245	0.343657	0.509228	ENSRNOT00000006356	Sec24a_predicted	PREDICTED: Rattus norvegicus SEC24 related gene family, member A (S. cerevisiae) (predicted) (Sec24a_predicted), mRNA [XM_213299]		FALSE
A_44_P191838	0.0378833	0.00353872	0.00283217	-0.530539	-0.553399	0.392716	0.281918	ENSRNOT00000008079	ENSRNOT00000008079	Guanine nucleotide regulatory protein (Fragment). [Source:Uniprot/SPTREMBL;Acc:Q99MC4] [ENSRNOT00000008079]		FALSE
A_42_P638181	0.0493829	0.00650602	-0.108528	-0.722691	-1.02609	-0.242369	-0.195163	NM_133395	Tpo1	Rattus norvegicus developmentally regulated protein TPO1 (Tpo1), mRNA [NM_133395]	NM_133395	FALSE
A_43_P14978	0.0323292	0.00222809	-0.0801562	-0.324185	-0.750703	-0.482476	-0.442191	AW918202	AW918202	AW918202 EST349506 Rat gene index, normalized rat, norvegicus, Bento Soares Rattus norvegicus cDNA clone RGIEN76 5' end, mRNA sequence [AW918202]	AW918202	FALSE
A_42_P598934	0.0456487	0.00547017	-0.588179	-1.07675	-1.81088	-0.140038	-0.409307	NM_001014269	Lrrfip1	Rattus norvegicus leucine rich repeat (in FLII) interacting protein 1 (Lrrfip1), mRNA [NM_001014269]	NM_001014269	FALSE
A_42_P469142	0.0380208	0.00359704	0.0435429	-0.534171	-0.729759	0.256092	0.236808	NM_001001515	LMO7	Rattus norvegicus LIM domain only protein 7 (LMO7), mRNA [NM_001001515]	NM_001001515	FALSE
A_44_P483152	0.0256092	0.00101497	-0.495152	-0.788399	-0.89889	-0.168399	0.132447	ENSRNOT00000005861	RGD1310474_predicted	PREDICTED: Rattus norvegicus similar to KIAA0423 (predicted) (RGD1310474_predicted), mRNA [XM_234236]		FALSE
A_44_P141075	0.0220056	0.000606895	-0.0668958	-0.487304	-0.88964	0.203185	0.237851	AI011151	AI011151	AI011151 EST205602 Normalized rat ovary, Bento Soares Rattus sp. cDNA clone ROVAQ18 3' end, mRNA sequence [AI011151]	AI011151	FALSE
A_44_P701889	0.0383712	0.00367879	-0.436051	-0.0787772	0.824964	-0.28292	-0.296635	TC622457	TC622457			FALSE
A_44_P336608	0.0376685	0.00347012	-0.113665	-0.4557	-0.335181	0.0142564	0.198025	BI395586	BI395586	BI395586 EST531457 Rat gene index, normalized rat, norvegicus Rattus norvegicus cDNA clone RGIBQ76 5' end, mRNA sequence [BI395586]	BI395586	FALSE
A_44_P620665	0.0182041	0.000122548	-0.452159	-0.556388	-0.710291	0.0325838	0.0969087	XM_343253	RGD1305976_predicted	PREDICTED: Rattus norvegicus similar to RIKEN cDNA C920006C10 (predicted) (RGD1305976_predicted), mRNA [XM_343253]	XM_343253	FALSE
A_44_P527921	0.0284005	0.00150719	-0.0359182	-0.209098	-0.146772	0.0599866	0.344022	NM_001012011	Lig3	Rattus norvegicus ligase III, DNA, ATP-dependent (Lig3), mRNA [NM_001012011]	NM_001012011	FALSE
A_42_P490576	0.0359961	0.00310889	-0.27437	-0.752045	-1.18303	-0.19367	-0.313293	XM_220600	Cntrob_predicted	PREDICTED: Rattus norvegicus centrobin, centrosomal BRCA2 interacting protein (predicted) (Cntrob_predicted), mRNA [XM_220600]	XM_220600	FALSE
A_44_P807031	0.0332498	0.00241267	0.221051	-0.0911181	-0.266562	0.0458802	0.17542	ENSRNOT00000023706	Tbc1d10b_predicted	PREDICTED: Rattus norvegicus TBC1 domain family, member 10b (predicted) (Tbc1d10b_predicted), mRNA [XM_344965]		FALSE
A_44_P362992	0.0378833	0.00356142	0.639477	0.232328	0.002859	0.609936	0.80079	NM_013176	Tcf12	Rattus norvegicus transcription factor 12 (Tcf12), mRNA [NM_013176]	NM_013176	FALSE
A_43_P22715	0.0349475	0.00285519	0.680854	0.195533	-0.422802	0.646849	1.07985	ENSRNOT00000037887	ENSRNOT00000037887	Alpha-mannosidase 2 (EC 3.2.1.114) (Alpha-mannosidase II) (Mannosyl- oligosaccharide 1,3-1,6-alpha-mannosidase) (MAN II) (Golgi alpha- mannosidase II) (Mannosidase alpha class 2A member 1) (Fragment). [Source:Uniprot/SWISSPROT;Acc:P28494]...		FALSE
A_43_P12909	0.0435595	0.00498896	0.0173949	-0.338998	-0.236419	0.222977	0.70038	NM_053714	Ank	Rattus norvegicus progressive ankylosis homolog (mouse) (Ank), mRNA [NM_053714]	NM_053714	FALSE
A_44_P240274	0.0252748	0.000980112	0.299002	0.264424	-1.20978	-1.14163	-0.646731	NM_001004228	Emcn	Rattus norvegicus endomucin (Emcn), mRNA [NM_001004228]	NM_001004228	FALSE
A_42_P722761	0.018484	0.000212264	0.186886	-0.438243	-0.795399	-0.237736	-0.0486864	XM_214940	Tbc1d17_predicted	PREDICTED: Rattus norvegicus TBC1 domain family, member 17 (predicted) (Tbc1d17_predicted), mRNA [XM_214940]	XM_214940	FALSE
A_44_P533172	0.0256492	0.00106385	-0.0563477	-0.241144	-0.623573	-0.135223	-0.234965	AI535535	AI535535	UI-R-C3-ta-b-07-0-UI.s1 UI-R-C3 Rattus norvegicus cDNA clone UI-R-C3-ta-b-07-0-UI 3', mRNA sequence [AI535535]	AI535535	FALSE
A_44_P281193	0.0268478	0.00125299	0.284973	0.0708284	-0.182336	0.226914	0.622819	ENSRNOT00000024185	RGD1305613	Similar to spinster-like protein. [Source:Uniprot/SPTREMBL;Acc:Q2YDU8] [ENSRNOT00000024185]		FALSE
A_44_P183359	0.0449579	0.0052893	0.371141	-0.00718457	-0.0515821	0.599211	0.991083	NM_001011996	Tmem24	Rattus norvegicus transmembrane protein 24 (Tmem24), mRNA [NM_001011996]	NM_001011996	FALSE
A_44_P451916	0.0235609	0.000807613	0.331713	0.171029	-0.672437	1.05358	0.419504	NM_032055	Tap1	Rattus norvegicus transporter 1, ATP-binding cassette, sub-family B (MDR/TAP) (Tap1), mRNA [NM_032055]	NM_032055	FALSE
A_44_P1031421	0.0455981	0.00546013	0.404882	-0.055438	-0.425746	0.629932	0.541304	ENSRNOT00000014802	Akap13	Rattus norvegicus protein kinase A anchoring protein Rt31 (LOC293024), mRNA [XM_214969]		FALSE
A_44_P266472	0.0115275	9.77282e-06	0.197962	-0.388352	-0.605935	-0.611144	-1.06051	AI172479	AI172479	AI172479 EST218491 Normalized rat muscle, Bento Soares Rattus sp. cDNA clone RMUCA36 3' end, mRNA sequence [AI172479]	AI172479	FALSE
A_44_P113247	0.0236763	0.000818929	0.260529	-0.115574	-0.239995	0.58014	0.794117	CF108344	CF108344	Shultzomica01595 Rat lung airway and parenchyma cDNA libraries Rattus norvegicus cDNA clone Contig1264 5', mRNA sequence [CF108344]	CF108344	FALSE
A_44_P1032487	0.0349475	0.00285368	0.146595	-0.0742593	-0.276729	0.412424	0.797491	NM_001025649	Tm9sf4	Rattus norvegicus transmembrane 9 superfamily protein member 4 (Tm9sf4), mRNA [NM_001025649]	NM_001025649	FALSE
A_44_P246846	0.0218785	0.000590299	0.167307	0.0462158	-1.01349	-0.63785	-0.46121	NM_001014179	Wdsub1	Rattus norvegicus WD repeat, SAM and U-box domain containing 1 (Wdsub1), mRNA [NM_001014179]	NM_001014179	FALSE
A_44_P414170	0.0476182	0.00605928	0.418547	-0.176482	-0.372159	0.582204	0.395182	NM_207592	Gpi	Rattus norvegicus glucose phosphate isomerase (Gpi), mRNA [NM_207592]	NM_207592	FALSE
A_44_P457226	0.0292538	0.00168546	-0.00451004	-0.460572	-1.09171	0.344286	0.423081	ENSRNOT00000023854	Sf3b3_predicted	PREDICTED: Rattus norvegicus splicing factor 3b, subunit 3 (predicted) (Sf3b3_predicted), mRNA [XM_214697]		FALSE
A_44_P497144	0.0257926	0.00107927	-0.497886	-0.726702	-0.832865	0.0303203	-0.0264778	XM_234490	LOC314393	PREDICTED: Rattus norvegicus similar to thyroid hormone receptor interactor 11 (LOC314393), mRNA [XM_234490]	XM_234490	FALSE
A_44_P125069	0.0300599	0.00183637	0.217867	0.10274	0.276575	0.820501	1.60851	XM_001074013	Trp53inp2	PREDICTED: Rattus norvegicus tumor protein p53 inducible nuclear protein 2 (Trp53inp2), mRNA [XM_001074013]	XM_001074013	FALSE
A_43_P10970	0.0494339	0.00652873	-0.0938532	-0.42243	-1.73527	0.0939168	0.0806384	XM_221034	Map3k3_predicted	PREDICTED: Rattus norvegicus mitogen activated protein kinase kinase kinase 3 (predicted) (Map3k3_predicted), mRNA [XM_221034]	XM_221034	FALSE
A_44_P478002	0.018484	0.000210251	0.0780212	-0.300622	-0.746261	-0.338019	-0.288115	ENSRNOT00000028690	Lsm14a_predicted	Rattus norvegicus similar to RIKEN cDNA 2700023B17 (LOC361554), mRNA [XM_341841]		FALSE
A_44_P1001762	0.0182041	9.82253e-05	-0.041005	0.0674651	-0.150026	-0.500206	-0.461092	CK841682	CK841682	UI-R-BJ0p-afy-g-09-0-UI.s10 UI-R-BJ0p Rattus norvegicus cDNA clone UI-R-BJ0p-afy-g-09-0-UI 3', mRNA sequence [CK841682]	CK841682	FALSE
A_44_P321110	0.0278761	0.00143341	-0.147686	-0.658773	-0.805023	0.0373826	0.101922	ENSRNOT00000025782	Eif3s8	Eif3s8 protein (Fragment). [Source:Uniprot/SPTREMBL;Acc:Q3MIB2] [ENSRNOT00000025782]		FALSE
A_44_P389098	0.0203907	0.000378509	-0.194971	-0.746717	-1.15059	-0.174523	0.0379201	XM_213779	Atxn2_predicted	PREDICTED: Rattus norvegicus ataxin 2 (predicted) (Atxn2_predicted), mRNA [XM_213779]	XM_213779	FALSE
A_44_P109383	0.031056	0.00201157	0.0221001	-0.700007	-0.97708	0.626595	1.08834	DN931087	DN931087	AGENCOURT_50201658 NCI_CGAP_Pr49 Rattus norvegicus cDNA clone IMAGE:7932799 5', mRNA sequence [DN931087]	DN931087	FALSE
A_44_P563159	0.0288637	0.00160421	-0.0809007	-0.618029	-0.683856	0.145392	0.740354	XM_575333	RGD1562135_predicted	PREDICTED: Rattus norvegicus RGD1562135 (predicted) (RGD1562135_predicted), mRNA [XM_575333]	XM_575333	FALSE
A_43_P18992	0.0280043	0.0014584	0.155704	-0.362011	-0.609994	0.45709	0.427995	ENSRNOT00000010097	RGD1310433_predicted	PREDICTED: Rattus norvegicus similar to mKIAA1757 protein (predicted) (RGD1310433_predicted), mRNA [XM_238368]		FALSE
A_44_P420869	0.0440833	0.00509835	-1.09413	-1.94863	-2.19778	-0.0108947	0.220333	BM391518	BM391518	BM391518 UI-R-DY0-ckr-g-20-0-UI.s1 NCI_CGAP_DY0 Rattus norvegicus cDNA clone IMAGE:7327246 3', mRNA sequence [BM391518]	BM391518	FALSE
A_43_P20392	0.0498218	0.00662608	0.0643712	-0.188547	-1.73863	0.298771	0.19998	ENSRNOT00000011864	ENSRNOT00000011864	PREDICTED: Rattus norvegicus similar to WD repeat domain 11 protein (predicted) (RGD1564964_predicted), mRNA [XM_236438]		FALSE
A_42_P468216	0.027636	0.0013921	-0.192702	-0.250489	-0.247342	0.341964	0.213023	NM_001030026	Ifi30	Rattus norvegicus interferon gamma inducible protein 30 (Ifi30), mRNA [NM_001030026]	NM_001030026	FALSE
A_44_P300232	0.0370245	0.0033152	0.0503519	-0.280535	-0.538403	0.321938	0.221353	ENSRNOT00000033684	Appbp2	Appbp2 protein (Fragment). [Source:Uniprot/SPTREMBL;Acc:Q5BJX9] [ENSRNOT00000033684]		FALSE
A_44_P252922	0.0305298	0.0019229	-0.427744	-0.6057	-0.943337	0.241305	0.18032	BC098824	Sec23ip	Rattus norvegicus SEC23 interacting protein, mRNA (cDNA clone IMAGE:7377967), complete cds. [BC098824]	BC098824	FALSE
A_44_P273989	0.0233161	0.00078592	-0.295608	-0.599075	-0.680953	0.027537	0.0885035	NM_017039	Ppp2ca	Rattus norvegicus protein phosphatase 2 (formerly 2A), catalytic subunit, alpha isoform (Ppp2ca), mRNA [NM_017039]	NM_017039	FALSE
A_43_P22777	0.0407758	0.00428258	-0.0905558	-0.402018	-0.697226	0.131897	-0.1049	XM_218717	Cyfip1_predicted	PREDICTED: Rattus norvegicus cytoplasmic FMR1 interacting protein 1 (predicted) (Cyfip1_predicted), mRNA [XM_218717]	XM_218717	FALSE
A_44_P322001	0.0334885	0.00245825	-0.225488	-0.395537	-0.616963	0.0205076	0.132411	AA955816	AA955816	UI-R-E1-fd-e-08-0-UI.s1 UI-R-E1 Rattus norvegicus cDNA clone UI-R-E1-fd-e-08-0-UI 3' similar to gi [AA955816]	AA955816	FALSE
A_44_P209926	0.0378833	0.00356536	0.426074	-0.356746	-0.859031	0.527833	0.773623	ENSRNOT00000008459	RGD1561653_predicted	PREDICTED: Rattus norvegicus similar to HECT domain containing 1 (predicted) (RGD1561653_predicted), mRNA [XM_343060]		FALSE
A_44_P434158	0.0325197	0.00229531	0.298274	0.0798805	-0.161962	0.610869	0.955053	NM_001011897	Alg3	Rattus norvegicus asparagine-linked glycosylation 3 homolog (yeast, alpha-1,3-mannosyltransferase) (Alg3), mRNA [NM_001011897]	NM_001011897	FALSE
A_44_P295256	0.0470227	0.00585293	-0.201977	-0.3847	-0.125029	0.545956	0.628873	ENSRNOT00000022462	Papd1_predicted	Rattus norvegicus similar to RIKEN cDNA 0610027A18 (LOC307050), mRNA [XM_225468]		FALSE
A_44_P254540	0.0460457	0.00558192	0.3993	-0.0202766	-0.20993	0.777165	0.937484	AW915585	AW915585	AW915585 EST346889 Normalized rat embryo, Bento Soares Rattus sp. cDNA clone RGICY07 5' end, mRNA sequence [AW915585]	AW915585	FALSE
A_44_P870203	0.0359961	0.00312699	-0.268975	-0.68091	-1.08832	0.0866251	0.144266	XM_229225	Baz2b_predicted	PREDICTED: Rattus norvegicus bromodomain adjacent to zinc finger domain, 2B (predicted) (Baz2b_predicted), mRNA [XM_229225]	XM_229225	FALSE
A_44_P592207	0.0485246	0.00629947	-0.284557	-0.846687	-1.76308	-1.14193	-1.11784	TC595793	TC595793	Q4E7G1_9RICK (Q4E7G1) Cytochrome C oxidase assembly protein, partial (10%) [TC595793]		FALSE
A_44_P487218	0.0309922	0.00200209	-0.504447	-1.06158	-1.50767	-0.212867	-0.404741	NM_138885	Golgb1	Rattus norvegicus golgi autoantigen, golgin subfamily b, macrogolgin 1 (Golgb1), mRNA [NM_138885]	NM_138885	FALSE
A_44_P107949	0.0286568	0.0015552	-0.141128	-0.476631	-0.49928	0.330408	0.392497	ENSRNOT00000011960	Dnajc11_predicted	Rattus norvegicus similar to hypothetical protein FLJ10737 (LOC362666), mRNA [XM_342983]		FALSE
A_44_P914875	0.018045	7.48483e-05	0.130796	-0.847442	-1.63771	0.576855	0.606314	TC626696	TC626696	NM_067132 SR Protein (splicing factor) family member (rsp-8) {Caenorhabditis elegans} (exp=-1; wgp=0; cg=0), partial (6%) [TC626696]		FALSE
A_44_P252417	0.0475632	0.00601575	0.80989	0.224102	-0.374057	0.995895	0.61598	NM_022281	Abcc1	Rattus norvegicus ATP-binding cassette, sub-family C (CFTR/MRP), member 1 (Abcc1), mRNA [NM_022281]	NM_022281	FALSE
A_44_P606549	0.0401128	0.00413693	0.413664	0.129154	0.351946	0.911332	1.11883	NM_001034150	Srpr	Rattus norvegicus signal recognition particle receptor ('docking protein') (Srpr), mRNA [NM_001034150]	NM_001034150	FALSE
A_44_P401140	0.0404775	0.00421595	0.0758394	-0.194459	-0.294197	0.172512	0.131481	NM_001012008	Zfp535	Rattus norvegicus zinc finger protein 535 (Zfp535), mRNA [NM_001012008]	NM_001012008	FALSE
A_43_P10314	0.0403433	0.00418804	0.321861	0.130688	0.00904036	0.482824	0.653637	ENSRNOT00000032627	LOC499076	PREDICTED: Rattus norvegicus similar to protein phosphatase 1, regulatory subunit 12C (LOC499076), mRNA [XM_574359]		FALSE
A_44_P389527	0.0439661	0.00506123	0.396816	0.421908	-0.818569	-0.0854472	-0.375975	ENSRNOT00000017288	Ppp1r8_predicted	Rattus norvegicus similar to RIKEN cDNA 6330548N22 (LOC313030), mRNA [XM_232739]		FALSE
A_44_P131240	0.029831	0.00178346	0.00597012	-0.591635	-1.24224	0.191486	0.298061	ENSRNOT00000050411	Dst_predicted	Rattus norvegicus similar to bullous pemphigoid antigen 1-b (LOC316313), mRNA [XM_237042]		FALSE
A_42_P815727	0.0208208	0.000484842	-0.076552	-0.662083	-1.43901	-0.0683266	-0.0086292	NM_198785	Usp48	Rattus norvegicus ubiquitin specific protease 48 (Usp48), mRNA [NM_198785]	NM_198785	FALSE
A_44_P521963	0.0464426	0.00567218	-0.0863136	-0.343201	-0.263146	0.148666	0.419969	AW915317	AW915317	AW915317 EST346621 Normalized rat embryo, Bento Soares Rattus sp. cDNA clone RGICU01 5' end, mRNA sequence [AW915317]	AW915317	FALSE
A_42_P712777	0.0244733	0.000903726	0.253036	-0.162209	0.0294377	0.603867	0.708127	NM_053575	Cabin1	Rattus norvegicus calcineurin binding protein 1 (Cabin1), mRNA [NM_053575]	NM_053575	FALSE
A_44_P480817	0.0182041	0.000133706	-0.189443	-0.582295	-0.427987	0.290377	0.623922	ENSRNOT00000008909	Mmp19_predicted	PREDICTED: Rattus norvegicus matrix metalloproteinase 19 (predicted) (Mmp19_predicted), mRNA [XM_222317]		FALSE
A_44_P192117	0.025783	0.00107532	-0.111935	-0.640019	-0.750404	0.315206	0.428401	CB579022	CB579022	AMGNNUC:SRCS1-00004-C10-A srcs1 (10883) Rattus norvegicus cDNA clone srcs1-00004-c10 5', mRNA sequence [CB579022]	CB579022	FALSE
A_44_P254144	0.018484	0.000223047	-0.510193	-0.816746	-0.949193	-0.209305	-0.14252	ENSRNOT00000056944	RGD1311920_predicted	PREDICTED: Rattus norvegicus similar to RIKEN cDNA 9130023F12 gene (predicted) (RGD1311920_predicted), mRNA [XM_223651]		FALSE
A_43_P12245	0.0286631	0.00156704	-0.24722	-0.410769	-0.364713	1.63568	1.52572	NM_022542	Rhob	Rattus norvegicus ras homolog gene family, member B (Rhob), mRNA [NM_022542]	NM_022542	FALSE
A_44_P540969	0.0286631	0.00157725	0.0611805	-0.0396388	0.0245934	0.530075	0.990845	NM_133421	Lkap	Rattus norvegicus limkain b1 (Lkap), mRNA [NM_133421]	NM_133421	FALSE
A_44_P368320	0.0203907	0.000409744	0.40688	0.697174	-0.425045	-0.295114	-0.319911	BC106025	LOC362665	Rattus norvegicus similar to KIAA0833 protein, mRNA (cDNA clone IMAGE:7386266), complete cds. [BC106025]	BC106025	FALSE
A_44_P932190	0.0338356	0.00253351	-0.154516	-0.208522	-1.11356	-0.884715	-0.771973	XM_575607	RGD1561296_predicted	PREDICTED: Rattus norvegicus similar to cDNA sequence BC022133 (predicted) (RGD1561296_predicted), mRNA [XM_575607]	XM_575607	FALSE
A_44_P120807	0.0222218	0.000671943	-0.124854	-0.246338	0.0525819	0.421361	0.713555	DY471696	DY471696	RVL22903 Wackym-Soares normalized rat vestibular cDNA library Rattus norvegicus cDNA 5', mRNA sequence [DY471696]	DY471696	FALSE
A_44_P380332	0.0448814	0.00526074	0.255517	-0.706322	0.0156112	0.665493	1.39563	ENSRNOT00000008946	Cyfip2_predicted	Rattus norvegicus similar to p53 inducible protein (LOC303073), mRNA [XM_220333]		FALSE
A_44_P323430	0.0274974	0.00135202	0.452427	0.0453802	-0.27416	-0.264532	-0.180761	NM_138532	Nme7	Rattus norvegicus non-metastatic cells 7, protein expressed in (Nme7), mRNA [NM_138532]	NM_138532	FALSE
A_44_P100557	0.0498478	0.00663439	0.59372	0.146792	-0.147357	0.875389	0.741771	NM_001007681	Zfp219	Rattus norvegicus zinc finger protein 219 (Zfp219), mRNA [NM_001007681]	NM_001007681	FALSE
A_44_P922379	0.0231595	0.000776235	0.428732	0.228114	0.273463	0.785676	1.0299	ENSRNOT00000054942	LOC688313	PREDICTED: Rattus norvegicus similar to alveolar soft part sarcoma chromosome region, candidate 1 long isoform (LOC691026), mRNA [XM_001076577]		FALSE
A_44_P314312	0.0267415	0.00122782	0.210892	-0.290793	-0.22962	1.22115	1.04538	ENSRNOT00000013535	Nol9	Nol9 protein (Fragment). [Source:Uniprot/SPTREMBL;Acc:Q4G021] [ENSRNOT00000013535]		FALSE
A_44_P290934	0.0265174	0.00119951	0.193671	-0.23727	-0.316017	0.304103	0.149827	A_44_P290934	A_44_P290934			FALSE
A_44_P297805	0.0372136	0.00335642	0.162862	-0.392674	-1.85152	0.00295722	0.175908	A_44_P297805	A_44_P297805			FALSE
A_43_P15356	0.0220056	0.000607641	0.00139821	-0.521062	-1.14754	1.12332	1.16792	NM_131904	Mgea5	Rattus norvegicus meningioma expressed antigen 5 (hyaluronidase) (Mgea5), mRNA [NM_131904]	NM_131904	FALSE
A_44_P453543	0.0283256	0.00149445	-0.403093	-0.556269	-0.792087	0.1082	0.275537	NM_001014248	RGD1308127	Rattus norvegicus similar to 2700078E11Rik protein (RGD1308127), mRNA [NM_001014248]	NM_001014248	FALSE
A_44_P575300	0.0414968	0.00443735	0.542173	0.0596955	0.262952	0.721623	0.915564	XR_008754	LOC498461	PREDICTED: Rattus norvegicus similar to Glyceraldehyde-3-phosphate dehydrogenase (GAPDH) (LOC498461), mRNA [XR_008754]	XR_008754	FALSE
A_43_P12574	0.0338452	0.00255519	0.271635	-0.159951	-0.420516	-0.0361875	-0.0101501	NM_031522	Neu1	Rattus norvegicus neuraminidase 1 (Neu1), mRNA [NM_031522]	NM_031522	FALSE
A_44_P529240	0.0386433	0.00373242	0.0214827	-0.110929	0.390247	0.547301	1.25871	NM_183054	Rhbg	Rattus norvegicus Rhesus blood group-associated B glycoprotein (Rhbg), mRNA [NM_183054]	NM_183054	FALSE
A_44_P225493	0.0175169	4.93586e-05	-0.33117	-0.588207	-0.872536	0.176933	0.388655	NM_145184	Usp15	Rattus norvegicus ubiquitin specific peptidase 15 (Usp15), mRNA [NM_145184]	NM_145184	FALSE
A_44_P303796	0.0429979	0.00479613	0.0493088	-0.0654491	-1.03771	-0.490056	-0.88517	AA851329	AA851329	AA851329 EST194097 Normalized rat placenta, Bento Soares Rattus sp. cDNA clone RPLAF30 3' end, mRNA sequence [AA851329]	AA851329	FALSE
A_42_P784931	0.0398218	0.00407394	0.0636898	-0.470255	-0.785297	0.171844	0.230154	ENSRNOT00000002302	Dopey2_predicted	PREDICTED: Rattus norvegicus dopey family member 2 (predicted) (Dopey2_predicted), mRNA [XM_221640]		FALSE
A_44_P290074	0.0182041	0.000130049	-0.748584	-1.11365	-1.15535	0.292549	0.344333	AI030162	AI030162	AI030162 UI-R-C0-it-a-08-0-UI.s1 UI-R-C0 Rattus norvegicus cDNA clone UI-R-C0-it-a-08-0-UI 3', mRNA sequence [AI030162]	AI030162	FALSE
A_44_P526056	0.0297332	0.00176136	-0.380373	-0.446596	-0.436724	-0.228553	-0.132742	NM_057141	Hnrpk	Rattus norvegicus heterogeneous nuclear ribonucleoprotein K (Hnrpk), mRNA [NM_057141]	NM_057141	FALSE
A_44_P316036	0.0363632	0.00319221	0.375016	0.727182	1.35752	-0.0131298	0.058309	NM_001000573	Olr724_predicted	Rattus norvegicus olfactory receptor 724 (predicted) (Olr724_predicted), mRNA [NM_001000573]	NM_001000573	FALSE
A_44_P537652	0.0231147	0.0007616	-0.0904022	-0.680222	-1.24197	-0.183328	0.0487102	XM_345867	Arid2_predicted	PREDICTED: Rattus norvegicus AT rich interactive domain 2 (Arid-rfx like) (predicted) (Arid2_predicted), mRNA [XM_345867]	XM_345867	FALSE
A_44_P398399	0.0182041	0.000111928	-0.669129	-0.90801	-0.899889	-0.138256	0.185379	NM_001005554	Tm9sf2	Rattus norvegicus transmembrane 9 superfamily member 2 (Tm9sf2), mRNA [NM_001005554]	NM_001005554	FALSE
A_44_P543917	0.0227296	0.000713015	-0.369484	-0.705205	-0.949703	0.143078	0.23932	ENSRNOT00000019195	Fbxo42_predicted	PREDICTED: Rattus norvegicus F-box protein 42 (predicted) (Fbxo42_predicted), mRNA [XM_342963]		FALSE
A_44_P288481	0.0236583	0.000814558	-0.0984651	-0.589284	-1.37936	0.92888	1.01359	ENSRNOT00000037142	Heatr1_predicted	PREDICTED: Rattus norvegicus HEAT repeat containing 1 (predicted) (Heatr1_predicted), mRNA [XM_341546]		FALSE
A_44_P802347	0.033472	0.00245247	-0.349756	-0.154048	-1.1162	0.201567	0.742561	BG672648	BG672648	BG672648 DRNCNF12 Rat DRG Library Rattus norvegicus cDNA clone DRNCNF12 5', mRNA sequence [BG672648]	BG672648	FALSE
A_44_P302613	0.0196408	0.000294306	-0.0795229	-0.554099	-0.981254	0.278089	0.464967	NM_133421	Lkap	Rattus norvegicus limkain b1 (Lkap), mRNA [NM_133421]	NM_133421	FALSE
A_44_P248644	0.0290136	0.00163535	0.208459	-0.162837	-0.0764526	1.06839	1.04751	ENSRNOT00000003284	RGD1562597_predicted	PREDICTED: Rattus norvegicus similar to expressed sequence AA415817 (predicted) (RGD1562597_predicted), mRNA [XM_222536]		FALSE
A_42_P839036	0.027636	0.00138153	-0.317331	-0.182332	-0.524096	-1.00736	-0.99223	ENSRNOT00000013359	RGD1311298_predicted	PREDICTED: Rattus norvegicus similar to RIKEN cDNA D030012E24 gene (predicted) (RGD1311298_predicted), mRNA [XM_213532]		FALSE
A_44_P277760	0.0253431	0.000991402	-0.0908067	-0.481127	-0.666478	0.00173068	0.227926	BI285572	BI285572	BI285572 UI-R-CW0s-ccb-g-02-0-UI.s1 UI-R-CW0s Rattus norvegicus cDNA clone UI-R-CW0s-ccb-g-02-0-UI 3', mRNA sequence [BI285572]	BI285572	FALSE
A_44_P118805	0.0285217	0.00153691	0.0886068	-0.325605	-0.588627	0.339864	0.456304	NM_019387	Hgs	Rattus norvegicus HGF-regulated tyrosine kinase substrate (Hgs), mRNA [NM_019387]	NM_019387	FALSE
A_42_P715712	0.0300629	0.00184026	-0.189836	-0.544543	-1.00647	-0.418128	-0.499859	BI395758	BI395758	BI395758 EST531629 Rat gene index, normalized rat, norvegicus Rattus norvegicus cDNA clone RGICN02 5' end, mRNA sequence [BI395758]	BI395758	FALSE
A_44_P534717	0.0203907	0.000411452	0.111172	-0.295506	-0.399479	0.665952	0.927644	ENSRNOT00000040113	Sbf1_predicted	PREDICTED: Rattus norvegicus SET binding factor 1 (predicted) (Sbf1_predicted), mRNA [XM_217021]		FALSE
A_43_P19879	0.0483419	0.0062385	0.0350347	0.815112	0.399225	-1.24187	-2.27942	ENSRNOT00000042872	ENSRNOT00000042872	PREDICTED: Rattus norvegicus similar to osteoclast inhibitory lectin (LOC689770), mRNA [XM_001071945]		FALSE
A_44_P578164	0.0329963	0.00235078	0.0781021	-0.181801	-1.05832	0.348849	0.605247	A_44_P578164	A_44_P578164			FALSE
A_44_P449263	0.020081	0.00034932	-0.435687	-0.490437	-1.64476	0.107648	0.147371	AW915889	AW915889	AW915889 EST347193 Rat gene index, normalized rat, norvegicus, Bento Soares Rattus norvegicus cDNA clone RGIDC15 5' end, mRNA sequence [AW915889]	AW915889	FALSE
A_44_P363204	0.0284849	0.00152157	0.0674582	-0.25045	-1.0874	0.518886	0.668121	NM_053824	Csnk2a1	Rattus norvegicus casein kinase II, alpha 1 polypeptide (Csnk2a1), mRNA [NM_053824]	NM_053824	FALSE
A_44_P499461	0.018045	6.98592e-05	0.119058	0.280123	0.0327646	-0.704695	-0.480584	ENSRNOT00000005854	ENSRNOT00000005854			FALSE
A_44_P729134	0.0375279	0.00342592	-0.222824	-0.0994923	-0.270362	-0.535406	-1.23985	A_44_P729134	A_44_P729134			FALSE
A_44_P452987	0.0429262	0.00476795	0.01115	-0.103515	-0.452153	-0.555038	-0.819102	AI234106	AI234106	AI234106 EST230794 Normalized rat lung, Bento Soares Rattus sp. cDNA clone RLUCV29 3' end, mRNA sequence [AI234106]	AI234106	FALSE
A_44_P100959	0.0369191	0.00328418	0.998111	0.484185	0.159799	0.874858	0.72801	ENSRNOT00000007003	ENSRNOT00000007003	PREDICTED: Rattus norvegicus similar to splicing factor, arginine [XM_231361]		FALSE
A_44_P819834	0.0378833	0.00353524	0.188465	0.0350372	-0.0527422	0.460029	0.600083	NM_001025678	Fkrp	Rattus norvegicus fukutin related protein (Fkrp), mRNA [NM_001025678]	NM_001025678	FALSE
A_44_P523198	0.0273638	0.00133069	-0.0456731	-0.531786	-1.49834	0.111869	0.483952	NM_001013946	Akap8l	Rattus norvegicus A kinase (PRKA) anchor protein 8-like (Akap8l), mRNA [NM_001013946]	NM_001013946	FALSE
A_44_P997146	0.0338356	0.00253341	0.124642	-0.305033	-0.867442	0.195236	0.366948	ENSRNOT00000024599	Gapvd1_predicted	Rattus norvegicus similar to KIAA1521 protein (LOC311880), mRNA [XM_231161]		FALSE
A_44_P363742	0.0228703	0.000731221	-0.575255	-0.794592	-1.00358	-0.0959097	-0.0388126	XM_233883	Slc4a1ap_predicted	PREDICTED: Rattus norvegicus solute carrier family 4 (anion exchanger), member 1, adaptor protein (predicted) (Slc4a1ap_predicted), mRNA [XM_233883]	XM_233883	FALSE
A_44_P291060	0.0417901	0.0044911	0.38546	0.0919501	0.000301003	0.449437	0.652997	ENSRNOT00000015257	Thrap5_predicted	PREDICTED: Rattus norvegicus thyroid hormone receptor associated protein 5 (predicted) (Thrap5_predicted), mRNA [XM_216837]		FALSE
A_44_P1057602	0.018484	0.000220075	-0.257998	-0.595909	-0.972248	-0.274958	-0.146238	XM_224627	Ercc6_predicted	PREDICTED: Rattus norvegicus excision repair cross-complementing rodent repair deficiency, complementation group 6 (predicted) (Ercc6_predicted), mRNA [XM_224627]	XM_224627	FALSE
A_44_P1056161	0.0251815	0.000964521	0.121425	0.0194995	-0.521302	-0.687349	-0.508611	NM_031976	Prkab1	Rattus norvegicus protein kinase, AMP-activated, beta 1 non-catalytic subunit (Prkab1), mRNA [NM_031976]	NM_031976	FALSE
A_43_P11122	0.0236589	0.000817177	-0.0831189	-0.302651	-0.467956	-1.13043	-1.02831	TC622035	TC622035	Q92GV3_RICCN (Q92GV3) AmpG protein, partial (6%) [TC622035]		FALSE
A_43_P23288	0.0405294	0.00422334	-0.321931	0.146479	0.626718	-0.714921	-0.477929	ENSRNOT00000007636	RGD1562515_predicted	PREDICTED: Rattus norvegicus similar to RIKEN cDNA 4931417E11 (predicted) (RGD1562515_predicted), mRNA [XM_575556]		FALSE
A_43_P18179	0.0262056	0.00112692	0.184201	-0.00953585	-0.0573975	0.406213	0.687504	ENSRNOT00000036156	RGD1307160_predicted	PREDICTED: Rattus norvegicus similar to golgi-specific brefeldin A-resistance guanine nucleotide exchange factor 1 (predicted) (RGD1307160_predicted), mRNA [XM_219953]		FALSE
A_44_P538526	0.0210034	0.000524906	0.0115174	-0.227607	-0.022038	0.487461	0.397681	DQ336705	Numb	Rattus norvegicus numb isoform i/i mRNA, complete cds, alternatively spliced. [DQ336705]	DQ336705	FALSE
A_44_P239331	0.0413541	0.00440598	0.0237917	0.424876	0.142647	-1.56376	-1.98394	BF398399	BF398399	BF398399 UI-R-BS2-beo-d-06-0-UI.s1 UI-R-BS2 Rattus norvegicus cDNA clone UI-R-BS2-beo-d-06-0-UI 3', mRNA sequence [BF398399]	BF398399	FALSE
A_42_P695042	0.0358223	0.00307017	-0.035005	-0.508976	-1.26458	0.438642	-0.0565048	NM_023981	Csf1	Rattus norvegicus colony stimulating factor 1 (macrophage) (Csf1), mRNA [NM_023981]	NM_023981	FALSE
A_44_P326623	0.0336677	0.00249535	0.281728	-0.250549	-0.108719	0.693621	1.05408	ENSRNOT00000035002	Zyg11bl	Zyg11bl protein (Fragment). [Source:Uniprot/SPTREMBL;Acc:Q5EB87] [ENSRNOT00000035002]		FALSE
A_44_P993382	0.0344951	0.00276102	0.635976	0.0671406	-0.465597	0.586971	0.655627	NM_031121	Ssrp1	Rattus norvegicus structure specific recognition protein 1 (Ssrp1), mRNA [NM_031121]	NM_031121	FALSE
A_43_P12404	0.0393779	0.00395352	-0.0553141	-0.138823	-0.831607	0.212773	-0.296787	NM_024147	Evl	Rattus norvegicus Ena-vasodilator stimulated phosphoprotein (Evl), mRNA [NM_024147]	NM_024147	FALSE
A_43_P21142	0.0421656	0.00458692	-0.0142701	-0.536691	-1.39294	0.089475	0.553294	ENSRNOT00000012383	Tlk1_predicted	PREDICTED: Rattus norvegicus tousled-like kinase 1 (predicted) (Tlk1_predicted), mRNA [XM_242032]		FALSE
A_44_P578428	0.0340746	0.00265598	-0.187835	-0.876308	-2.32707	-0.29662	-0.0135434	TC629455	TC629455	Q5TQL3_ANOGA (Q5TQL3) ENSANGP00000028414, partial (5%) [TC629455]		FALSE
A_44_P140100	0.030805	0.00196443	0.148996	0.0644987	0.0581979	0.536761	0.691262	ENSRNOT00000003551	RGD1308992_predicted	PREDICTED: Rattus norvegicus similar to ezrin-binding partner PACE-1 (predicted) (RGD1308992_predicted), mRNA [XM_341142]		FALSE
A_42_P744033	0.0248537	0.000935243	-0.0413824	-0.224522	-0.298144	0.434157	0.48629	XM_219705	RGD1305958	PREDICTED: Rattus norvegicus similar to BB128963 protein (RGD1305958), mRNA [XM_219705]	XM_219705	FALSE
A_44_P458065	0.0482849	0.00621901	0.460252	0.236927	0.0982199	0.632543	0.649036	NM_013087	Cd81	Rattus norvegicus CD 81 antigen (Cd81), mRNA [NM_013087]	NM_013087	FALSE
A_44_P530637	0.0359961	0.00312193	0.621314	0.374616	0.617874	0.984908	1.52991	NM_001025056	Gmppa	Rattus norvegicus GDP-mannose pyrophosphorylase A (Gmppa), mRNA [NM_001025056]	NM_001025056	FALSE
A_44_P1008950	0.0159481	2.17541e-05	-0.0262296	-0.379718	0.102037	1.33705	1.45538	NM_001013880	LOC290651	Rattus norvegicus similar to myo-inositol 1-phosphate synthase A1 (LOC290651), mRNA [NM_001013880]	NM_001013880	FALSE
A_44_P206061	0.0279205	0.00144652	-0.114802	-0.350335	-1.03471	-0.472496	-0.260602	XM_219779	RGD1311595	PREDICTED: Rattus norvegicus similar to KIAA2026 protein (RGD1311595), mRNA [XM_219779]	XM_219779	FALSE
A_44_P500880	0.0203907	0.000388311	0.0854548	-0.449553	-0.685456	1.03694	0.999111	NM_019288	App	Rattus norvegicus amyloid beta (A4) precursor protein (App), mRNA [NM_019288]	NM_019288	FALSE
A_43_P15300	0.0319297	0.00215551	0.262549	-0.138932	-0.417548	0.261124	0.868758	NM_024144	Pigm	Rattus norvegicus phosphatidylinositol glycan, class M (Pigm), mRNA [NM_024144]	NM_024144	FALSE
A_44_P637856	0.0300099	0.00181525	-0.472258	-0.821957	-1.54022	-0.595481	-0.598595	TC632814	TC632814	Q8CIV9_RAT (Q8CIV9) Co-activator/regulatory zinc-finger protein NIF (Fragment), partial (4%) [TC632814]		FALSE
A_44_P460973	0.0475463	0.00600149	-0.136506	-0.500597	-0.951592	-0.313533	-0.289911	AW914768	AW914768	AW914768 EST346072 Normalized rat ovary, Bento Soares Rattus sp. cDNA clone RGIBH05 5' end, mRNA sequence [AW914768]	AW914768	FALSE
A_44_P696494	0.045267	0.00539402	-0.0645798	-0.262673	-0.600334	-0.8272	-0.490713	BI395606	BI395606	BI395606 EST531477 Rat gene index, normalized rat, norvegicus Rattus norvegicus cDNA clone RGIBT16 5' end, mRNA sequence [BI395606]	BI395606	FALSE
A_44_P387331	0.0339275	0.00261475	-0.0698312	-0.466141	-0.926068	0.0763173	-0.0194862	ENSRNOT00000005433	RGD1564148_predicted	similar to microfibrillar-associated protein 1 (LOC365673), mRNA [Source:RefSeq_dna;Acc:XR_009024] [ENSRNOT00000021562]		FALSE
A_44_P273990	0.0284849	0.00152115	-0.28682	-0.519903	-0.647141	0.0610281	0.124862	NM_017039	Ppp2ca	Rattus norvegicus protein phosphatase 2 (formerly 2A), catalytic subunit, alpha isoform (Ppp2ca), mRNA [NM_017039]	NM_017039	FALSE
A_43_P12964	0.0182041	8.99884e-05	-0.624765	-0.800611	-0.947306	-0.364117	-0.208092	NM_053866	Plaa	Rattus norvegicus phospholipase A2, activating protein (Plaa), mRNA [NM_053866]	NM_053866	FALSE
A_44_P286528	0.018484	0.000213586	-0.300224	-0.287685	-0.703037	0.318595	0.791674	NM_001039207	Narf	Rattus norvegicus nuclear prelamin A recognition factor (Narf), mRNA [NM_001039207]	NM_001039207	FALSE
A_44_P489062	0.0378869	0.00356845	0.00567305	-0.282131	-1.39171	0.426296	0.592487	CO389876	CO389876	AGENCOURT_26624337 NIH_MGC_253 Rattus norvegicus cDNA clone IMAGE:7300803 5', mRNA sequence [CO389876]	CO389876	FALSE
A_44_P238246	0.0263791	0.00115948	-0.0490661	-0.32591	-0.969774	0.269006	0.133892	NM_053412	Ilf3	Rattus norvegicus interleukin enhancer binding factor 3 (Ilf3), mRNA [NM_053412]	NM_053412	FALSE
A_44_P506392	0.0233809	0.000793365	-0.543917	-1.0586	-1.18515	0.544109	0.958344	ENSRNOT00000024753	Abce1	PREDICTED: Rattus norvegicus ATP-binding cassette, sub-family E (OABP), member 1 (Abce1), mRNA [XM_341669]		FALSE
A_44_P224547	0.0378833	0.00355578	0.155471	-0.517638	-1.20753	-1.90861	-0.964235	NM_001077641	Plcb1	Rattus norvegicus phospholipase C, beta 1 (Plcb1), mRNA [NM_001077641]	NM_001077641	FALSE
A_44_P885104	0.0265174	0.00120133	0.000530481	-0.660716	-1.08174	-0.529555	-0.608661	TC589432	TC589432			FALSE
A_44_P1034720	0.0359961	0.00312314	-0.0307523	0.527167	0.803192	-0.489783	-0.654449	ENSRNOT00000033715	RGD1305090_predicted	PREDICTED: Rattus norvegicus similar to CD2-associated protein (predicted) (RGD1305090_predicted), mRNA [XM_342916]		FALSE
A_44_P128711	0.0391392	0.00386403	0.00230587	0.0235696	0.175592	0.673297	1.11638	XM_217566	Sh3bgrl_predicted	PREDICTED: Rattus norvegicus SH3-binding domain glutamic acid-rich protein like (predicted) (Sh3bgrl_predicted), mRNA [XM_217566]	XM_217566	FALSE
A_44_P1054501	0.0290421	0.0016553	-0.257834	-0.934861	-1.06366	-0.275368	-0.0406233	ENSRNOT00000009222	Eif2ak4_predicted	PREDICTED: Rattus norvegicus eukaryotic translation initiation factor 2 alpha kinase 4 (predicted) (Eif2ak4_predicted), mRNA [XM_230462]		FALSE
A_42_P489681	0.0473085	0.00594072	-0.439633	-1.1569	-1.87874	-0.43844	-0.675056	BC085903	BC085903	Rattus norvegicus cDNA clone IMAGE:7193711 [BC085903]	BC085903	FALSE
A_44_P166572	0.0360251	0.00313596	0.328537	-0.0511004	-0.371957	0.823515	1.10101	ENSRNOT00000008576	ENSRNOT00000008576	PREDICTED: Rattus norvegicus similar to tubulin, gamma 2 (LOC680991), mRNA [XM_001059827]		FALSE
A_44_P508079	0.0251815	0.000965454	0.209759	-0.181116	-0.661218	0.562369	0.845335	NM_024361	Ndst1	Rattus norvegicus N-deacetylase/N-sulfotransferase (heparan glucosaminyl) 1 (Ndst1), mRNA [NM_024361]	NM_024361	FALSE
A_43_P19947	0.0378833	0.00352759	-0.00750959	-0.198485	-0.119896	0.37954	0.54673	ENSRNOT00000019824	Dhx36_predicted	Rattus norvegicus similar to DEAD/H box polypeptide 36 protein (LOC310461), mRNA [XM_227203]		FALSE
A_42_P769921	0.0207852	0.000480217	-0.203563	-0.201642	-0.456629	-0.832892	-0.713349	AW917548	AW917548	AW917548 EST348852 Rat gene index, normalized rat, norvegicus, Bento Soares Rattus norvegicus cDNA clone RGIEF18 5' end, mRNA sequence [AW917548]	AW917548	FALSE
A_43_P19830	0.0426692	0.00471239	0.22693	0.0947823	-0.366849	-0.000377655	0.0300307	NM_001047099	Ythdf2_predicted	Rattus norvegicus YTH domain family 2 (predicted) (Ythdf2_predicted), mRNA [NM_001047099]	NM_001047099	FALSE
A_43_P11241	0.0365789	0.00321649	-0.416203	-0.991292	-1.20286	-0.0322534	-0.0507938	ENSRNOT00000055970	ENSRNOT00000055970	Mi-2 autoantigen (Fragment). [Source:Uniprot/SPTREMBL;Acc:O88747] [ENSRNOT00000055970]		FALSE
A_43_P14599	0.0415745	0.00445781	-0.16831	-0.23041	-0.576625	-0.692716	-0.690952	XM_216872	Nup37_predicted	PREDICTED: Rattus norvegicus nucleoporin 37 (predicted) (Nup37_predicted), mRNA [XM_216872]	XM_216872	FALSE
A_44_P213524	0.0260682	0.00111134	0.0810147	-0.215682	-0.27619	0.418581	0.902958	ENSRNOT00000038993	ENSRNOT00000038993	RGD1307410 protein (Fragment). [Source:Uniprot/SPTREMBL;Acc:Q5EB78] [ENSRNOT00000038993]		FALSE
A_44_P187830	0.0397219	0.00404995	-0.387554	-0.593689	-1.26605	0.0403368	-0.00212896	ENSRNOT00000002851	RGD1304621_predicted	PREDICTED: Rattus norvegicus similar to Hypothetical protein KIAA0539 (predicted) (RGD1304621_predicted), mRNA [XM_221669]		FALSE
A_43_P12798	0.0472006	0.00589863	0.109077	-0.113563	-1.08088	0.420747	0.591112	NM_053407	Asah1	Rattus norvegicus N-acylsphingosine amidohydrolase (acid ceramidase) (Asah), mRNA [NM_053407]	NM_053407	FALSE
A_44_P345703	0.039234	0.00389495	-0.554501	-0.140095	0.129424	-1.04017	-1.10512	AA924473	AA924473	AA924473 UI-R-A1-dx-g-02-0-UI.s1 UI-R-A1 Rattus norvegicus cDNA clone UI-R-A1-dx-g-02-0-UI 3' similar to gi [AA924473]	AA924473	FALSE
A_44_P380575	0.0345115	0.00276401	-0.176315	-0.707214	-0.363483	0.251807	0.350571	NM_017353	Slc7a5	Rattus norvegicus solute carrier family 7 (cationic amino acid transporter, y+ system), member 5 (Slc7a5), mRNA [NM_017353]	NM_017353	FALSE
A_44_P208949	0.0220056	0.000601609	0.0775846	-0.224909	-0.297009	0.465673	0.606231	XM_343986	Srp68_predicted	Rattus norvegicus similar to signal recognition particle 68kDa (LOC363707), mRNA [XM_343986]	XM_343986	FALSE
A_44_P495832	0.0340861	0.00266186	0.420835	0.0358377	0.0283868	0.940654	1.00256	ENSRNOT00000012701	Pgm3_predicted	PREDICTED: Rattus norvegicus phosphoglucomutase 3 (predicted) (Pgm3_predicted), mRNA [XM_343442]		FALSE
A_43_P15633	0.0222025	0.000666704	-0.0989808	-0.110577	-0.104174	0.266804	0.454081	ENSRNOT00000015458	Pkn2	Serine/threonine-protein kinase N2 (EC 2.7.11.13) (Protein kinase C- like 2) (Protein-kinase C-related kinase 2) (Protease-activated kinase 2) (PAK-2). [Source:Uniprot/SWISSPROT;Acc:O08874] [ENSRNOT00000015458]		FALSE
A_44_P315723	0.0378833	0.00356557	-0.57841	-0.301808	-0.296208	-0.837672	-1.04632	AA900371	AA900371	AA900371 UI-R-E0-cm-f-01-0-UI.s2 UI-R-E0 Rattus norvegicus cDNA clone UI-R-E0-cm-f-01-0-UI 3' similar to gi [AA900371]	AA900371	FALSE
A_42_P528007	0.0300099	0.00181869	-0.0794609	-0.608488	-0.83032	-0.181469	0.0967305	NM_053871	Srp54	Rattus norvegicus signal recognition particle 54 (Srp54), mRNA [NM_053871]	NM_053871	FALSE
A_44_P298268	0.020081	0.000345401	0.0210526	-0.254521	-0.846487	0.165315	0.510482	NM_133421	Lkap	Rattus norvegicus limkain b1 (Lkap), mRNA [NM_133421]	NM_133421	FALSE
A_43_P14713	0.0329963	0.00235141	-0.188419	-0.591901	-0.710342	-0.886985	-1.21488	XM_222189	RGD1310383_predicted	PREDICTED: Rattus norvegicus similar to T-cell activation protein phosphatase 2C (predicted) (RGD1310383_predicted), mRNA [XM_222189]	XM_222189	FALSE
A_44_P513687	0.0267495	0.00123146	1.07283	0.400652	0.124924	1.11667	1.18763	XM_233941	XM_233941	Rattus norvegicus similar to DNA methyltransferase 3A (LOC313927), mRNA [XM_233941]	XM_233941	FALSE
A_42_P843424	0.0435541	0.00494917	0.12671	-0.411964	-0.260049	0.714885	0.471718	NM_012859	Lipe	Rattus norvegicus lipase, hormone sensitive (Lipe), mRNA [NM_012859]	NM_012859	FALSE
A_44_P686876	0.0324735	0.00228597	-0.0637143	-0.570571	-1.45549	-0.375977	-0.158333	XM_001080744	RGD1563715_predicted	PREDICTED: Rattus norvegicus similar to Gem (nuclear organelle) associated protein 4 (predicted) (RGD1563715_predicted), mRNA [XM_001080744]	XM_001080744	FALSE
A_42_P806899	0.0359961	0.00311283	0.00564861	-0.508918	-0.790474	0.823916	0.684853	XM_343919	Jmjd3_predicted	PREDICTED: Rattus norvegicus jumonji domain containing 3 (predicted) (Jmjd3_predicted), mRNA [XM_343919]	XM_343919	FALSE
A_44_P393282	0.018484	0.000168322	-0.0127828	-0.368872	-0.746561	-0.0449505	-0.0142291	NM_176856	2010-09-09	Rattus norvegicus septin 9 (Sept9), transcript variant 2, mRNA [NM_176856]	NM_176856	FALSE
A_44_P381384	0.0340245	0.00264299	0.164483	-0.347142	-0.539004	0.0858875	0.0922674	AW143018	AW143018	AW143018 EST293313 Normalized rat brain, Bento Soares Rattus sp. cDNA clone RGIBB71 5' end, mRNA sequence [AW143018]	AW143018	FALSE
A_44_P283670	0.0395407	0.00400887	-0.378738	0.590209	1.77637	-1.156	-0.655728	A_44_P283670	A_44_P283670			FALSE
A_44_P250030	0.0358112	0.00306616	0.906507	0.629964	0.182862	-0.301511	-0.29511	NM_013107	Bmp6	Rattus norvegicus bone morphogenetic protein 6 (Bmp6), mRNA [NM_013107]	NM_013107	FALSE
A_42_P596024	0.0256092	0.00105084	0.059028	-0.822737	-0.826612	0.664407	0.992642	NM_019167	Spnb3	Rattus norvegicus spectrin beta 3 (Spnb3), mRNA [NM_019167]	NM_019167	FALSE
A_43_P13362	0.0472006	0.00590391	0.112862	-0.316396	-0.626674	0.136817	0.173461	NM_139094	Rbm16	Rattus norvegicus RNA binding motif protein 16 (Rbm16), mRNA [NM_139094]	NM_139094	FALSE
A_44_P153217	0.0271376	0.00129887	-0.00894499	-0.642579	-1.0024	0.155503	0.348196	BF555980	BF555980	BF555980 UI-R-A1-dy-b-10-0-UI.r1 UI-R-A1 Rattus norvegicus cDNA clone UI-R-A1-dy-b-10-0-UI 5', mRNA sequence [BF555980]	BF555980	FALSE
A_44_P865962	0.0221841	0.000645795	0.172421	-0.119307	-0.853573	0.780109	1.14971	NM_001007656	Mapre3	Rattus norvegicus microtubule-associated protein, RP/EB family, member 3 (Mapre3), mRNA [NM_001007656]	NM_001007656	FALSE
A_44_P236453	0.0265174	0.00120058	0.128072	-0.104657	-0.556294	0.403349	0.400115	XM_001064901	LOC688540	PREDICTED: Rattus norvegicus similar to Microtubule-associated serine [XM_001064901]	XM_001064901	FALSE
A_44_P372461	0.0245933	0.000915344	0.351058	0.195434	-0.0123583	0.667751	0.862075	BC078936	Preb	Rattus norvegicus prolactin regulatory element binding, mRNA (cDNA clone MGC:93749 IMAGE:7108249), complete cds. [BC078936]	BC078936	FALSE
A_44_P210461	0.0158102	1.86347e-05	0.350163	-0.00285411	-0.00347626	0.613647	0.886802	NM_017025	Ldha	Rattus norvegicus lactate dehydrogenase A (Ldha), mRNA [NM_017025]	NM_017025	FALSE
A_44_P161692	0.040281	0.00417194	0.0879519	-0.207262	-0.663487	0.275848	0.46489	NM_001025699	LOC313618	Rattus norvegicus macoilin (LOC313618), mRNA [NM_001025699]	NM_001025699	FALSE
A_44_P171128	0.0227296	0.000710678	-0.015929	-0.0143197	-0.401574	1.28524	1.79641	XM_232987	Alg2	PREDICTED: Rattus norvegicus asparagine-linked glycosylation 2 homolog (yeast, alpha-1,3-mannosyltransferase) (Alg2), mRNA [XM_232987]	XM_232987	FALSE
A_44_P247411	0.0294903	0.00172886	-0.253091	-0.599264	-1.06629	-0.138036	0.0873307	ENSRNOT00000050733	ENSRNOT00000050733	Androgen-induced proliferation inhibitor (Fragment). [Source:Uniprot/SPTREMBL;Acc:Q6TRW4] [ENSRNOT00000050733]		FALSE
A_42_P547856	0.0342343	0.00269223	0.0383731	-0.371907	-1.46976	-0.230204	-0.617448	NM_012713	Prkcb1	Rattus norvegicus protein kinase C, beta 1 (Prkcb1), mRNA [NM_012713]	NM_012713	FALSE
A_44_P323785	0.0413541	0.00440485	-0.117751	-0.235424	-0.157925	0.602122	0.694982	XM_230974	XM_230974	Rattus norvegicus similar to Sp3 protein (LOC311738), mRNA [XM_230974]	XM_230974	FALSE
A_44_P402375	0.0203907	0.000376642	0.0572053	-0.572238	-0.525001	0.794148	0.489699	NM_031576	Por	Rattus norvegicus P450 (cytochrome) oxidoreductase (Por), mRNA [NM_031576]	NM_031576	FALSE
A_44_P273783	0.018484	0.000198676	0.803225	0.189838	-0.0916601	0.494819	0.752584	NM_153300	Aldh1a3	Rattus norvegicus aldehyde dehydrogenase family 1, subfamily A3 (Aldh1a3), mRNA [NM_153300]	NM_153300	FALSE
A_44_P559225	0.044147	0.00511002	-0.068262	-0.434867	-0.59921	-0.403355	-0.208188	XM_236321	Fem1b_predicted	PREDICTED: Rattus norvegicus feminization 1 homolog b (C. elegans) (predicted) (Fem1b_predicted), mRNA [XM_236321]	XM_236321	FALSE
A_44_P529516	0.0182041	0.000139348	0.0530311	-0.0468256	0.00500023	0.563396	0.848769	NM_080909	Rtn3	Rattus norvegicus reticulon 3 (Rtn3), transcript variant 1, mRNA [NM_080909]	NM_080909	FALSE
A_44_P180980	0.0244003	0.000896035	0.274697	-0.669265	-1.06588	-0.966809	-0.268156	BQ209232	BQ209232	BQ209232 UI-R-DY1-cnt-c-16-0-UI.s1 NCI_CGAP_DY1 Rattus norvegicus cDNA clone IMAGE:7334442 3', mRNA sequence [BQ209232]	BQ209232	FALSE
A_44_P290139	0.0294903	0.00172893	0.0645003	-0.315565	-0.57788	-0.671474	-1.05648	NM_199112	RGD735175	Rattus norvegicus hypothetical protein MGC:72616 (RGD735175), mRNA [NM_199112]	NM_199112	FALSE
A_44_P1046816	0.0282697	0.00148462	-0.162005	0.104435	-0.0390126	-1.10473	-0.906974	NM_031656	Stx8	Rattus norvegicus syntaxin 8 (Stx8), mRNA [NM_031656]	NM_031656	FALSE
A_44_P291088	0.0452569	0.0053862	0.340409	-0.270242	-0.342825	0.967625	1.02313	ENSRNOT00000045130	Mon2	Mon2 protein. [Source:Uniprot/SPTREMBL;Acc:Q3KR70] [ENSRNOT00000045130]		FALSE
A_44_P412491	0.0438742	0.00504851	0.310222	-0.098663	-0.0546237	0.47272	0.564199	NM_001013909	RGD1309487	Rattus norvegicus similar to hypothetical protein FLJ10233 (RGD1309487), mRNA [NM_001013909]	NM_001013909	FALSE
A_44_P169863	0.0201021	0.000361868	0.0672177	-0.739157	-1.08213	0.349723	0.1981	BE109195	BE109195	UI-R-BS1-azd-a-06-0-UI.s1 UI-R-BS1 Rattus norvegicus cDNA clone UI-R-BS1-azd-a-06-0-UI 3', mRNA sequence [BE109195]	BE109195	FALSE
A_44_P459362	0.0290136	0.00163302	-0.134305	-0.45834	-1.18671	0.434241	0.644868	ENSRNOT00000013901	Xpo4_predicted	PREDICTED: Rattus norvegicus exportin 4 (predicted) (Xpo4_predicted), mRNA [XM_214191]		FALSE
A_44_P487876	0.0231147	0.000771301	-0.180667	-0.18745	-0.370108	-0.914315	-0.856483	NM_001008361	Rnf167	Rattus norvegicus ring finger protein 167 (Rnf167), mRNA [NM_001008361]	NM_001008361	FALSE
A_44_P145422	0.0475632	0.00603442	0.236874	0.608546	0.452687	-0.421492	-0.302074	BF559782	BF559782	UI-R-A0-bn-c-05-0-UI.r1 UI-R-A0 Rattus norvegicus cDNA clone UI-R-A0-bn-c-05-0-UI 5', mRNA sequence [BF559782]	BF559782	FALSE
A_44_P447650	0.0354164	0.00297797	-0.284012	-1.02907	-1.37432	-0.403736	-0.13128	NM_012894	Adarb1	Rattus norvegicus adenosine deaminase, RNA-specific, B1 (Adarb1), mRNA [NM_012894]	NM_012894	FALSE
A_44_P492352	0.035463	0.00302335	0.432402	0.40483	0.273813	-0.406276	-0.23868	NM_001007645	MGC95152	Rattus norvegicus similar to B230212L03Rik protein (MGC95152), mRNA [NM_001007645]	NM_001007645	FALSE
A_44_P861558	0.0378833	0.00354677	-0.0138209	-0.777596	-1.00757	0.547216	0.438089	ENSRNOT00000001334	Ncor2_predicted	PREDICTED: Rattus norvegicus nuclear receptor co-repressor 2 (predicted) (Ncor2_predicted), mRNA [XM_341072]		FALSE
A_44_P313844	0.0182041	8.91293e-05	-0.384402	-0.696858	-0.807471	0.360516	0.584313	NM_017107	Ogt	Rattus norvegicus O-linked N-acetylglucosamine (GlcNAc) transferase (UDP-N-acetylglucosamine:polypeptide-N-acetylglucosaminyl transferase) (Ogt), mRNA [NM_017107]	NM_017107	FALSE
A_44_P994238	0.0311953	0.00203209	0.657401	0.312905	-0.0207714	-0.52959	-0.404637	ENSRNOT00000020532	Ogn_predicted	PREDICTED: Rattus norvegicus osteoglycin (predicted) (Ogn_predicted), mRNA [XM_214441]		FALSE
A_42_P820650	0.0493829	0.00649113	-0.563155	-0.584734	-0.587235	0.0731434	0.341599	AW918031	AW918031	AW918031 EST349335 Rat gene index, normalized rat, norvegicus, Bento Soares Rattus norvegicus cDNA clone RGIEL41 5' end, mRNA sequence [AW918031]	AW918031	FALSE
A_44_P277935	0.0300629	0.00183899	-0.080559	-0.892928	-2.37235	-0.310888	-0.073086	ENSRNOT00000009173	Arid1a_predicted	PREDICTED: Rattus norvegicus AT rich interactive domain 1A (Swi1 like) (predicted) (Arid1a_predicted), mRNA [XM_216340]		FALSE
A_44_P324482	0.0021115	4.11458e-07	1.70243	1.29838	0.167344	-1.1754	-1.87403	NM_001025762	Smyd3	Rattus norvegicus SET and MYND domain containing 3 (Smyd3), mRNA [NM_001025762]	NM_001025762	FALSE
A_44_P1060345	0.038408	0.00368419	-0.342764	-0.735229	-0.874004	-0.346956	-0.0742563	NM_001037095	Cpox	Rattus norvegicus coproporphyrinogen oxidase (Cpox), mRNA [NM_001037095]	NM_001037095	FALSE
A_44_P527432	0.0407679	0.00426407	0.0720966	-0.387215	-0.733839	0.524977	0.424569	ENSRNOT00000060928	ENSRNOT00000060928	PREDICTED: Rattus norvegicus nuclear receptor binding SET domain protein 1 (predicted) (Nsd1_predicted), mRNA [XM_225168]		FALSE
A_44_P236647	0.0434906	0.00492781	0.45749	0.220159	0.218137	1.36379	1.16068	NM_001013931	RGD1311249	Rattus norvegicus similar to RIKEN cDNA B230312A22 (RGD1311249), mRNA [NM_001013931]	NM_001013931	FALSE
A_42_P797206	0.0290136	0.00162342	0.214938	-0.151541	-0.353606	0.221387	0.447065	XM_342555	XM_342555	Rattus norvegicus similar to copine I (LOC362249), mRNA [XM_342555]	XM_342555	FALSE
A_44_P426529	0.0220056	0.000609205	0.596899	0.559015	0.462789	-2.36616	-2.34007	ENSRNOT00000023329	Me3_predicted	PREDICTED: Rattus norvegicus malic enzyme 3, NADP(+)-dependent, mitochondrial (predicted) (Me3_predicted), mRNA [XM_341880]		FALSE
A_44_P1056429	0.0263791	0.00117235	-0.192641	-0.870207	-1.4142	-0.880567	-0.828394	XM_236715	RGD1307844_predicted	Rattus norvegicus similar to 106 kDa O-GlcNAc transferase-interacting protein (LOC316085), mRNA [XM_236715]	XM_236715	FALSE
A_44_P559392	0.0340245	0.00263868	-0.44585	-0.376448	-0.344412	-0.967606	-1.34314	BF281355	Txn1	EST445946 Rat Gene Index, normalized rat, Rattus norvegicus cDNA Rattus norvegicus cDNA clone RGIAD62 3' sequence, mRNA sequence [BF281355]	BF281355	FALSE
A_44_P464942	0.0182041	0.000112437	-0.0441396	-1.03834	-2.13713	0.832265	0.845196	BF545795	BF545795	BF545795 UI-R-BT0-qc-d-07-0-UI.r1 UI-R-BT0 Rattus norvegicus cDNA clone UI-R-BT0-qc-d-07-0-UI 5', mRNA sequence [BF545795]	BF545795	FALSE
A_44_P273697	0.0260682	0.00110835	0.607346	-0.038104	-0.0866383	1.53262	1.30165	NM_017022	Itgb1	Rattus norvegicus integrin beta 1 (fibronectin receptor beta) (Itgb1), mRNA [NM_017022]	NM_017022	FALSE
A_44_P345009	0.0410503	0.00433891	0.289696	0.153857	-0.304086	-0.0127934	-0.0956095	NM_001008526	Bag5	Rattus norvegicus BCL2-associated athanogene 5 (Bag5), mRNA [NM_001008526]	NM_001008526	FALSE
A_44_P500923	0.0196408	0.000298186	-0.488008	-0.716677	-0.894121	-0.083654	-0.0821069	NM_080896	Hnrph1	Rattus norvegicus heterogeneous nuclear ribonucleoprotein H1 (Hnrph1), mRNA [NM_080896]	NM_080896	FALSE
A_44_P480490	0.0435541	0.00496286	0.530338	0.0974653	0.137269	1.00623	1.21108	NM_001011918	Anxa11	Rattus norvegicus annexin A11 (Anxa11), mRNA [NM_001011918]	NM_001011918	FALSE
A_44_P148542	0.0330425	0.00236048	-0.0420725	0.901923	1.54365	-0.448496	-0.270948	AI059837	AI059837	AI059837 UI-R-C1-kr-c-11-0-UI.s1 UI-R-C1 Rattus norvegicus cDNA clone UI-R-C1-kr-c-11-0-UI 3', mRNA sequence [AI059837]	AI059837	FALSE
A_43_P10309	0.0330573	0.00237634	0.183464	-0.157222	-0.435948	-0.11669	-0.189132	NM_001012179	Fxr1h	Rattus norvegicus fragile X mental retardation gene 1, autosomal homolog (Fxr1h), mRNA [NM_001012179]	NM_001012179	FALSE
A_44_P279002	0.0218785	0.000591542	-0.605674	-0.931591	-1.1908	0.00580323	-0.210629	ENSRNOT00000006549	Prpf40a_predicted	Rattus norvegicus similar to formin binding protein 11 (LOC295607), mRNA [XM_215739]		FALSE
A_43_P10923	0.0325197	0.00229317	-0.341222	-0.655174	-1.03587	-0.446337	-0.574024	NM_023955	Scamp2	Rattus norvegicus secretory carrier membrane protein 2 (Scamp2), mRNA [NM_023955]	NM_023955	FALSE
A_44_P1037110	0.0175169	4.80684e-05	-0.430214	-0.538352	-0.534889	0.148082	0.252213	NM_001025414	Dnd1	Rattus norvegicus dead end homolog 1 (zebrafish) (Dnd1), mRNA [NM_001025414]	NM_001025414	FALSE
A_44_P373039	0.0465765	0.00572481	-0.390463	0.140623	0.519519	-0.250805	-0.061823	XR_006423	LOC688561	PREDICTED: Rattus norvegicus similar to N-acetyltransferase, homolog of S. cerevisiae ARD1 (LOC688561), mRNA [XR_006423]	XR_006423	FALSE
A_42_P658005	0.0311169	0.00201844	0.51521	0.0426247	-0.0868917	2.19939	0.968504	ENSRNOT00000005372	R3hdm1	PREDICTED: Rattus norvegicus R3H domain containing 1 (R3hdm1), mRNA [XM_573442]		FALSE
A_44_P276782	0.0300629	0.00184241	0.0746719	-0.396374	-0.839515	0.210414	0.199099	ENSRNOT00000019025	ENSRNOT00000019025	PREDICTED: Rattus norvegicus transformation related protein 53 binding protein 1 (predicted) (Trp53bp1_predicted), mRNA [XM_215812]		FALSE
A_44_P334145	0.0336693	0.00250321	0.167329	0.0135774	0.0515503	0.499393	0.45116	XM_001075972	LOC687346	PREDICTED: Rattus norvegicus similar to BRCA1-associated protein (BRAP2) (Impedes mitogenic signal propagation) (IMP) (LOC687346), mRNA [XM_001075972]	XM_001075972	FALSE
A_44_P482928	0.018484	0.000168805	0.0540522	-0.108877	-0.564441	-0.403656	-0.569392	BC099109	Abt1	Rattus norvegicus activator of basal transcription 1, mRNA (cDNA clone MGC:116249 IMAGE:7461222), complete cds. [BC099109]	BC099109	FALSE
A_44_P103215	0.0391469	0.00386758	0.118259	-0.408845	-0.492242	0.142911	0.380703	XM_347236	Sec23a_predicted	PREDICTED: Rattus norvegicus SEC23A (S. cerevisiae) (predicted) (Sec23a_predicted), mRNA [XM_347236]	XM_347236	FALSE
A_44_P489076	0.0222445	0.000675395	0.265503	-0.0285618	-0.436511	0.538772	0.408459	AW915692	AW915692	AW915692 EST346996 Normalized rat embryo, Bento Soares Rattus sp. cDNA clone RGICZ46 5' end, mRNA sequence [AW915692]	AW915692	FALSE
A_44_P170283	0.0228807	0.000734984	0.475543	-0.400198	-1.02068	0.202533	0.309876	CF108204	CF108204	Shultzomica01455 Rat lung airway and parenchyma cDNA libraries Rattus norvegicus cDNA clone Contig1125 5', mRNA sequence [CF108204]	CF108204	FALSE
A_43_P22823	0.0355706	0.00303425	0.384419	-0.0168769	1.42735	0.960881	0.877568	ENSRNOT00000060928	ENSRNOT00000060928	PREDICTED: Rattus norvegicus nuclear receptor binding SET domain protein 1 (predicted) (Nsd1_predicted), mRNA [XM_225168]		FALSE
A_42_P506402	0.0392384	0.00390373	0.19431	-0.874253	-1.33351	-0.187725	0.162935	NM_145677	Slc25a25	Rattus norvegicus solute carrier family 25 (mitochondrial carrier, phosphate carrier), member 25 (Slc25a25), mRNA [NM_145677]	NM_145677	FALSE
A_44_P147806	0.0407758	0.00428477	0.152522	-0.157384	-0.223374	0.432282	0.510438	ENSRNOT00000014629	ENSRNOT00000014629	similar to exosome component 10 (LOC313707), mRNA [Source:RefSeq_dna;Acc:XR_007065] [ENSRNOT00000014629]		FALSE
A_44_P638290	0.0466544	0.00575709	-0.0930926	-0.780707	-1.07644	-1.10564	-0.980958	NM_001024327	LOC500110	Rattus norvegicus similar to zinc finger protein EZI (LOC500110), mRNA [NM_001024327]	NM_001024327	FALSE
A_43_P11686	0.018484	0.000206382	-0.311242	-0.676703	-1.04413	-1.74782	-1.5178	NM_013062	Kdr	Rattus norvegicus kinase insert domain protein receptor (Kdr), mRNA [NM_013062]	NM_013062	FALSE
A_44_P991864	0.0338452	0.00258864	-0.261293	-0.710758	-0.7215	0.708955	0.308523	NM_053596	Ece1	Rattus norvegicus endothelin converting enzyme 1 (Ece1), mRNA [NM_053596]	NM_053596	FALSE
A_44_P1041142	0.045485	0.00542887	-0.312296	-0.316014	-0.687967	-0.730843	-0.786596	NM_173133	Phax	Rattus norvegicus phosphorylated adaptor for RNA export (Phax), mRNA [NM_173133]	NM_173133	FALSE
A_44_P438269	0.042266	0.00460609	-0.335321	-0.617946	-0.471147	-0.0813616	0.117573	NM_022585	Azin1	Rattus norvegicus antizyme inhibitor 1 (Azin1), mRNA [NM_022585]	NM_022585	FALSE
A_44_P206258	0.018484	0.000167293	0.0042063	-0.272063	-0.573882	0.407627	0.569928	NM_001034146	Usp10	Rattus norvegicus ubiquitin specific protease 10 (Usp10), mRNA [NM_001034146]	NM_001034146	FALSE
A_44_P623316	0.0243829	0.000888013	-0.0888548	0.0033229	-0.518842	-0.779793	-0.855256	XM_574414	LOC499120	PREDICTED: Rattus norvegicus hypothetical protein LOC499120 (LOC499120), mRNA [XM_574414]	XM_574414	FALSE
A_44_P105434	0.0218785	0.000586201	-0.126413	-0.383598	-0.518083	0.166373	0.485344	ENSRNOT00000000345	Sec63_predicted	Rattus norvegicus similar to SEC63 (LOC309858), mRNA [XM_228305]		FALSE
A_42_P570919	0.0336677	0.00249129	-0.105019	-0.276414	-0.10068	0.218848	0.578491	NM_031000	Akr1a1	Rattus norvegicus aldo-keto reductase family 1, member A1 (Akr1a1), mRNA [NM_031000]	NM_031000	FALSE
A_44_P422948	0.0345558	0.0027743	-0.204942	-0.719459	-1.1772	0.0798123	0.0357854	AW915444	AW915444	AW915444 EST346748 Normalized rat embryo, Bento Soares Rattus sp. cDNA clone RGICV47 5' end, mRNA sequence [AW915444]	AW915444	FALSE
A_44_P102652	0.0466544	0.00576083	0.193717	-0.192484	-0.351652	0.522877	0.5617	NM_080899	Ikbkap	Rattus norvegicus inhibitor of kappa light polypeptide enhancer in B-cells, kinase complex-associated protein (Ikbkap), mRNA [NM_080899]	NM_080899	FALSE
A_44_P483177	0.0435595	0.00498462	-0.0477241	-0.327203	-0.344813	0.574645	0.371038	NM_001009344	Tbrg1	Rattus norvegicus transforming growth factor beta regulated gene 1 (Tbrg1), mRNA [NM_001009344]	NM_001009344	FALSE
A_44_P441296	0.0286631	0.00156564	0.589424	0.0795355	0.384343	1.19258	1.42509	ENSRNOT00000041930	ENSRNOT00000041930	similar to Glyceraldehyde-3-phosphate dehydrogenase (GAPDH) (38 kDa BFA-dependent ADP-ribosylation substrate) (BARS-38) (LOC366729), mRNA [Source:RefSeq_dna;Acc:XR_008740] [ENSRNOT00000041930]		FALSE
A_42_P832915	0.0458302	0.00552346	0.21748	-0.267846	-0.470673	0.583418	0.45069	NM_178101	Plod3	Rattus norvegicus procollagen-lysine, 2-oxoglutarate 5-dioxygenase 3 (Plod3), mRNA [NM_178101]	NM_178101	FALSE
A_44_P301875	0.025034	0.000957359	-0.385572	-0.76671	-0.902351	0.0185509	-0.0217367	ENSRNOT00000042451	Wdr44	WD repeat protein 44 (Rabphilin-11). [Source:Uniprot/SWISSPROT;Acc:Q9R037] [ENSRNOT00000042451]		FALSE
A_44_P561388	0.0253431	0.000988882	-0.144257	-0.669756	-0.949837	-0.585901	-0.419204	TC586672	TC586672			FALSE
A_44_P622315	0.0349475	0.00284911	0.400848	-0.0368576	-0.0627584	-0.923011	-1.29092	TC584981	TC584981			FALSE
A_44_P516194	0.020908	0.000504907	0.591529	0.0549381	0.0698737	1.05066	1.04501	NM_001012237	RGD1306364	Rattus norvegicus similar to cDNA sequence BC029169 (RGD1306364), mRNA [NM_001012237]	NM_001012237	FALSE
A_42_P765356	0.0391392	0.00386492	-0.112951	-0.290183	-0.369683	0.201485	0.580048	ENSRNOT00000024697	Sephs1	Rattus norvegicus clone UI-R-FJ0-cpw-a-12-0-UI unknown mRNA. [AY724491]		FALSE
A_44_P473389	0.0197154	0.000321578	0.113729	-0.520578	-0.595922	0.357803	0.757005	XM_214519	RGD1563437_predicted	Rattus norvegicus similar to SNAP-25-interacting protein (LOC291356), mRNA [XM_214519]	XM_214519	FALSE
A_44_P1024529	0.0252748	0.000977742	-0.180714	-0.299003	-0.410141	0.395276	0.829693	NM_001009720	Sfrs2	Rattus norvegicus similar to splicing factor, arginine/serine-rich 2 (Sfrs2), mRNA [NM_001009720]	NM_001009720	FALSE
A_44_P180268	0.0260682	0.00110802	0.0221466	-0.344913	-0.470812	0.342934	0.430994	NM_001008338	Lrrc8d	Rattus norvegicus leucine rich repeat containing 8 family, member D (Lrrc8d), mRNA [NM_001008338]	NM_001008338	FALSE
A_44_P533778	0.020908	0.000496414	-0.00401819	-0.712005	-0.85206	0.348005	0.169515	NM_030830	Luzp1	Rattus norvegicus leucine zipper protein 1 (Luzp1), mRNA [NM_030830]	NM_030830	FALSE
A_42_P471578	0.0343996	0.00272321	0.33489	-0.131163	-0.177342	0.647829	0.897499	NM_012680	Tsc2	Rattus norvegicus tuberous sclerosis 2 (Tsc2), mRNA [NM_012680]	NM_012680	FALSE
A_44_P445476	0.0220056	0.000609432	0.190125	-0.195416	-0.3309	1.29701	1.58235	ENSRNOT00000024465	RGD1564130_predicted	Rattus norvegicus similar to TBP-associated factor 172 (TAF-172) (TAF(II)170) (LOC309511), mRNA [XM_220044]		FALSE
A_44_P541213	0.00118654	1.73412e-07	1.0843	1.19122	0.385362	-1.8883	-3.17399	XM_001059639	LOC681383	PREDICTED: Rattus norvegicus similar to Protein C10orf11 homolog (LOC681383), mRNA [XM_001059639]	XM_001059639	FALSE
A_44_P294817	0.031494	0.00208203	-0.468523	-0.512724	-0.51274	-0.0420669	0.0487973	NM_001034163	Blmh	Rattus norvegicus bleomycin hydrolase (Blmh), mRNA [NM_001034163]	NM_001034163	FALSE
A_44_P440450	0.030135	0.0018527	0.115323	-0.0849011	-0.1714	0.887864	0.868441	NM_017118	Capns1	Rattus norvegicus calpain, small subunit 1 (Capns1), mRNA [NM_017118]	NM_017118	FALSE
A_44_P747024	0.0426692	0.00470953	-0.258518	-0.95532	-1.28329	0.0892402	0.564474	TC597353	TC597353	Q6BCZ4_MOUSE (Q6BCZ4) Fetal liver expressing gene 1, partial (3%) [TC597353]		FALSE
A_42_P600947	0.0190992	0.000274385	0.465114	-0.00810069	-0.0112185	1.03453	1.29876	XM_217309	LOC301130	PREDICTED: Rattus norvegicus similar to Dipeptidyl peptidase 9 (Dipeptidyl peptidase IX) (DP9) (Dipeptidyl peptidase-like protein 9) (DPLP9) (LOC301130), mRNA [XM_217309]	XM_217309	FALSE
A_44_P315661	0.0274974	0.00134332	-1.07926	-1.76955	-1.89215	-0.258097	0.326111	NM_013134	Hmgcr	Rattus norvegicus 3-hydroxy-3-methylglutaryl-Coenzyme A reductase (Hmgcr), mRNA [NM_013134]	NM_013134	FALSE
A_44_P104590	0.030252	0.00187316	0.100859	-0.419313	-0.448251	0.495618	0.549178	NM_053620	Cdc42bpb	Rattus norvegicus Cdc42 binding protein kinase beta (Cdc42bpb), mRNA [NM_053620]	NM_053620	FALSE
A_43_P13170	0.0204717	0.000428302	-0.00538647	-0.2331	-0.427196	-0.651872	-0.390859	NM_133387	Tmlhe	Rattus norvegicus trimethyllysine hydroxylase, epsilon (Tmlhe), mRNA [NM_133387]	NM_133387	FALSE
A_44_P316422	0.0388525	0.00380088	-0.426946	-0.451956	-0.752445	0.367777	0.341525	A_44_P316422	A_44_P316422			FALSE
A_44_P548398	0.0366551	0.00322602	-0.0394992	-0.811496	-0.883502	0.399438	0.665444	ENSRNOT00000027846	RGD1308759_predicted	Rattus norvegicus similar to KIAA0892 protein (LOC290668), mRNA [XM_214306]		FALSE
A_44_P998720	0.0309922	0.00199374	-0.10003	-0.407886	-0.221436	0.288017	0.600764	ENSRNOT00000027847	Tjp3_predicted	PREDICTED: Rattus norvegicus tight junction protein 3 (predicted) (Tjp3_predicted), mRNA [XM_234924]		FALSE
A_42_P607039	0.0222822	0.000689298	-0.444888	-0.738243	-0.812788	0.156209	0.0145227	XM_230589	Anapc1_predicted	PREDICTED: Rattus norvegicus anaphase promoting complex subunit 1 (predicted) (Anapc1_predicted), mRNA [XM_230589]	XM_230589	FALSE
A_44_P667768	0.0289083	0.00161178	-0.344925	-0.526373	-0.743836	-0.189476	0.055652	A_44_P667768	A_44_P667768			FALSE
A_42_P519024	0.0497411	0.00659994	0.0881885	-0.105705	-0.267883	0.796669	0.664232	NM_001005761	Mtmr9	Rattus norvegicus myotubularin related protein 9 (Mtmr9), mRNA [NM_001005761]	NM_001005761	FALSE
A_43_P10938	0.0309922	0.0019943	-0.200922	-0.677336	-1.19461	-0.743255	-0.861201	CF109238	CF109238	Shultzomica02489 Rat lung airway and parenchyma cDNA libraries Rattus norvegicus cDNA clone Contig2143 5', mRNA sequence [CF109238]	CF109238	FALSE
A_44_P154367	0.0354309	0.00298921	0.0759067	-0.275012	-0.194135	0.551535	0.712095	NM_001024744	Cdc16	Rattus norvegicus CDC16 cell division cycle 16 homolog (S. cerevisiae) (Cdc16), mRNA [NM_001024744]	NM_001024744	FALSE
A_44_P328829	0.0342343	0.00269016	0.0978777	-0.795405	-0.457713	0.546944	0.274218	XM_220639	Nek8_predicted	Rattus norvegicus similar to NIMA-related kinase 8 (LOC287473), mRNA [XM_220639]	XM_220639	FALSE
A_44_P480605	0.0486028	0.00632426	0.644879	0.126557	0.307936	0.73653	0.93306	ENSRNOT00000039569	LOC291543	similar to glyceraldehyde-3-phosphate dehydrogenase (LOC291543), mRNA [Source:RefSeq_dna;Acc:XR_006815] [ENSRNOT00000039569]		FALSE
A_44_P254896	0.0216274	0.000553598	0.431038	-0.0864868	-0.0736123	1.07255	1.15151	AJ277077	Ddb1	Rattus norvegicus mRNA for damage-specific DNA binding protein 1 (DDB1 gene). [AJ277077]	AJ277077	FALSE
A_44_P1026917	0.0311747	0.00202748	-0.14545	-0.0314477	-0.0338191	-1.01469	-0.581098	NM_001030033	C1galt1c1	Rattus norvegicus C1GALT1-specific chaperone 1 (C1galt1c1), mRNA [NM_001030033]	NM_001030033	FALSE
A_44_P102607	0.0255728	0.00100537	0.051254	-0.784131	-0.624562	0.915459	1.00267	NM_033021	Sec31l1	Rattus norvegicus SEC31-like 1 (S. cerevisiae) (Sec31l1), mRNA [NM_033021]	NM_033021	FALSE
A_44_P285247	0.0207852	0.000478433	0.00231135	-0.272379	-0.103052	0.534885	0.581622	ENSRNOT00000015232	RGD1559986_predicted	AW144296 EST294592 Normalized rat ovary, Bento Soares Rattus sp. cDNA clone RGICP54 5' end, mRNA sequence [AW144296]		FALSE
A_44_P108772	0.0285217	0.0015329	-0.00414336	-0.466338	-0.713975	0.368147	0.221842	XM_233679	Ube4b_predicted	PREDICTED: Rattus norvegicus ubiquitination factor E4B, UFD2 homolog (S. cerevisiae) (predicted) (Ube4b_predicted), mRNA [XM_233679]	XM_233679	FALSE
A_44_P422014	0.0263791	0.00117618	0.117538	-0.195687	-0.604171	0.419197	0.227815	BC088839	LOC296300	Rattus norvegicus similar to zinc finger protein 341, mRNA (cDNA clone IMAGE:7125614), partial cds [BC088839]	BC088839	FALSE
A_44_P947342	0.027636	0.00138986	-0.372232	-1.00545	-1.0211	-0.261394	-0.631578	TC582495	TC582495	Q5RK26_RAT (Q5RK26) RGD1305574 protein (Fragment), complete [TC582495]		FALSE
A_44_P1034640	0.0378983	0.00358154	-0.39941	-0.10553	-0.0224303	-1.0113	-0.64849	TC591151	TC591151	BC049583 transmembrane protein 42 {Mus musculus} (exp=-1; wgp=0; cg=0), partial (91%) [TC591151]		FALSE
A_44_P396040	0.0442039	0.00511876	0.375667	-0.28842	-0.317543	1.50795	1.03668	ENSRNOT00000017212	Tmem2_predicted	Rattus norvegicus similar to transmembrane protein 2 (LOC309400), mRNA [XM_219898]		FALSE
A_44_P1037526	0.0231147	0.000751249	0.319106	-0.232672	-0.758734	0.498534	0.45669	NM_001047087	Eif3s10	Rattus norvegicus eukaryotic translation initiation factor 3, subunit 10 (theta) (Eif3s10), mRNA [NM_001047087]	NM_001047087	FALSE
A_44_P119296	0.0330642	0.00238071	-0.210229	0.159758	-0.233449	-0.721631	-0.728473	NM_001007626	Ggps1	Rattus norvegicus geranylgeranyl diphosphate synthase 1 (Ggps1), mRNA [NM_001007626]	NM_001007626	FALSE
A_44_P408108	0.0434906	0.00491797	0.675296	0.169862	-0.218499	0.832869	0.949369	ENSRNOT00000031690	Nbeal2_predicted	PREDICTED: Rattus norvegicus neurobeachin-like 2 (predicted) (Nbeal2_predicted), mRNA [XM_236649]		FALSE
A_44_P914137	0.0444814	0.00517689	-0.194105	-0.585465	-0.819527	-0.167961	-0.350876	A_44_P914137	A_44_P914137			FALSE
A_44_P388072	0.0377916	0.00349067	-0.0963223	-0.10938	-0.378084	0.431609	0.52881	ENSRNOT00000015483	RGD1311909_predicted	PREDICTED: Rattus norvegicus hypothetical LOC312654 (predicted) (RGD1311909_predicted), mRNA [XM_001054467]		FALSE
A_44_P183185	0.0455543	0.00544157	0.514682	-0.059635	-0.231316	0.594615	0.601544	ENSRNOT00000016163	Fxr2h_predicted	Fragile-X mental retardation related protein 2 (Fragment). [Source:Uniprot/SPTREMBL;Acc:Q8K4F9] [ENSRNOT00000016163]		FALSE
A_44_P465986	0.0434906	0.00492492	0.365595	-0.129868	-0.411357	0.511317	0.418899	NM_212547	Rab2l	Rattus norvegicus RAB2, member RAS oncogene family-like (Rab2l), mRNA [NM_212547]	NM_212547	FALSE
A_44_P1007933	0.0182041	9.42906e-05	-0.506585	-0.510837	-0.935674	-2.08002	-2.2534	NM_001044294	MGC125167	Rattus norvegicus similar to gamma-aminobutyric acid (GABA(A)) receptor-associated protein-like 1 (MGC125167), mRNA [NM_001044294]	NM_001044294	FALSE
A_44_P573304	0.0216274	0.000558777	0.0353826	-0.138594	-0.54605	-0.687832	-0.924471	AW916728	AW916728	AW916728 EST348032 Rat gene index, normalized rat, norvegicus, Bento Soares Rattus norvegicus cDNA clone RGIDU05 5' end, mRNA sequence [AW916728]	AW916728	FALSE
A_44_P520700	0.0285634	0.00154457	-0.10051	-0.156663	-0.286769	0.611935	0.265216	ENSRNOT00000034723	RGD1561742_predicted	PREDICTED: Rattus norvegicus similar to serine/threonine protein kinase 24 (LOC501266), mRNA [XR_009551]		FALSE
A_44_P1042294	0.0499236	0.00666393	0.360369	-0.0495984	-0.343334	0.447204	0.478296	ENSRNOT00000016581	RGD1565549_predicted	PREDICTED: Rattus norvegicus similar to polybromo-1 (predicted) (RGD1565549_predicted), mRNA [XM_240329]		FALSE
A_44_P387078	0.0400766	0.00412539	0.441019	0.0100376	-0.011012	1.26164	1.1747	ENSRNOT00000007777	Rbm28_predicted	PREDICTED: Rattus norvegicus RNA binding motif protein 28 (predicted) (Rbm28_predicted), mRNA [XM_231550]		FALSE
A_44_P361780	0.0239431	0.000836868	-0.263574	-0.245354	-0.153785	-1.08389	-1.00455	CB606190	CB606190	CB606190 AMGNNUC:NRWA3-00022-C9-A white adipose tiss (10469) Rattus norvegicus cDNA clone nrwa3-00022-c9 5', mRNA sequence [CB606190]	CB606190	FALSE
A_43_P23290	0.0396387	0.00403692	0.149742	0.434635	0.578762	-0.137467	-0.230152	ENSRNOT00000027574	Sh3pxd2a_predicted	PREDICTED: Rattus norvegicus SH3 and PX domains 2A (predicted) (Sh3pxd2a_predicted), mRNA [XM_219971]		FALSE
A_44_P205528	0.035463	0.00302198	-0.0806789	0.258957	0.74479	-0.149764	0.00284946	NM_145786	Iiig9	Rattus norvegicus IIIG9 protein (Iiig9), mRNA [NM_145786]	NM_145786	FALSE
A_44_P264777	0.035118	0.00288957	-0.232524	0.421773	0.42775	-0.388375	-0.167134	NM_012699	Dnajb9	Rattus norvegicus DnaJ (Hsp40) homolog, subfamily B, member 9 (Dnajb9), mRNA [NM_012699]	NM_012699	FALSE
A_44_P730150	0.0190847	0.000268176	0.515764	-0.207876	-0.602279	-0.329462	-0.363791	TC605210	TC605210	Q3J975_NITOC (Q3J975) Flagellar biosynthesis protein FliQ precursor, partial (15%) [TC605210]		FALSE
A_44_P1004694	0.0456974	0.0054872	0.326298	-0.264479	-0.498368	0.300084	0.387396	XM_216945	XM_216945	Rattus norvegicus similar to hypothetical protein (LOC300049), mRNA [XM_216945]	XM_216945	FALSE
A_44_P395977	0.0303805	0.00190628	-0.00368941	-0.185813	-0.384394	-0.668945	-0.651134	ENSRNOT00000022069	Ndnl2	Ndnl2 protein (Fragment). [Source:Uniprot/SPTREMBL;Acc:Q4KM72] [ENSRNOT00000022069]		FALSE
A_44_P545816	0.018484	0.000195648	1.49211	0.98847	0.382184	-1.90811	-0.306151	NM_022384	Ascl1	Rattus norvegicus achaete-scute complex homolog-like 1 (Drosophila) (Ascl1), mRNA [NM_022384]	NM_022384	FALSE
A_44_P1005858	0.0428152	0.00475145	0.218594	-0.264086	-0.249938	0.634633	0.669846	CO404131	CO404131	AGENCOURT_27549001 NIH_MGC_254 Rattus norvegicus cDNA clone IMAGE:7313005 5', mRNA sequence [CO404131]	CO404131	FALSE
A_44_P713910	0.0449083	0.00527033	-0.00464213	-0.192956	-0.0589573	0.351377	0.464582	ENSRNOT00000035048	ENSRNOT00000035048	similar to ubiquitin-conjugating enzyme E2 variant 1 (LOC684481), mRNA [Source:RefSeq_dna;Acc:XR_008719] [ENSRNOT00000035048]		FALSE
A_44_P971443	0.0476724	0.0060685	0.244194	-0.117369	-0.23626	0.602599	0.451777	AW918781	AW918781	AW918781 EST350085 Rat gene index, normalized rat, norvegicus, Bento Soares Rattus norvegicus cDNA clone RGIEY05 5' end, mRNA sequence [AW918781]	AW918781	FALSE
A_44_P536333	0.0376685	0.00346857	-0.00758064	0.476261	0.708486	-0.260211	-0.147193	NM_017010	Grin1	Rattus norvegicus glutamate receptor, ionotropic, N-methyl D-aspartate 1 (Grin1), mRNA [NM_017010]	NM_017010	FALSE
A_43_P13109	0.0182041	0.000142096	0.390049	0.23208	-0.153906	-2.41549	-1.15289	NM_130408	Cyp26a1	Rattus norvegicus cytochrome P450, family 26, subfamily A, polypeptide 1 (Cyp26a1), mRNA [NM_130408]	NM_130408	FALSE
A_44_P199526	0.0115275	7.35213e-06	-0.0661274	-0.400256	-0.573211	0.507229	0.728536	XM_001074879	LOC690586	PREDICTED: Rattus norvegicus similar to ankyrin repeat domain 40 (LOC690586), mRNA [XM_001074879]	XM_001074879	FALSE
A_43_P20775	0.0469221	0.00582127	0.14285	-0.146331	-0.228156	0.430387	0.540643	NM_001024773	Brf2	Rattus norvegicus BRF2, subunit of RNA polymerase III transcription initiation factor, BRF1-like (Brf2), mRNA [NM_001024773]	NM_001024773	FALSE
A_44_P915165	0.0263791	0.00115467	-0.458276	-0.989577	-0.687053	0.191885	0.0893346	TC597191	TC597191			FALSE
A_44_P283339	0.0227296	0.000711742	-0.185797	0.253218	0.470026	0.800035	0.910713	NM_001004249	Tmed3	Rattus norvegicus transmembrane emp24 domain containing 3 (Tmed3), mRNA [NM_001004249]	NM_001004249	FALSE
A_44_P349408	0.018484	0.000186191	0.308891	-0.0221495	-0.320826	0.687736	0.696491	NM_001024797	LOC499653	Rattus norvegicus Dingo protein (LOC499653), mRNA [NM_001024797]	NM_001024797	FALSE
A_44_P350823	0.0243559	0.000880668	-0.0517325	-0.481705	-0.748191	0.352804	0.346186	ENSRNOT00000017424	Cherp_predicted	PREDICTED: Rattus norvegicus calcium homeostasis endoplasmic reticulum protein (predicted) (Cherp_predicted), mRNA [XM_214307]		FALSE
A_44_P530041	0.0412706	0.00438904	0.396122	0.0342861	-0.23194	-0.134876	-0.14325	ENSRNOT00000004224	Hdac8_predicted	Rattus norvegicus similar to histone deacetylase 8; histone deacetylase-like 1 (LOC363481), mRNA [XM_343804]		FALSE
A_44_P530697	0.0493829	0.00650877	0.392218	-0.162319	-0.523109	0.823843	0.386687	ENSRNOT00000017984	RGD1565575_predicted	similar to senataxin; DEAxQ-box helicase; tRNA splicing endonuclease regulator 1 (predicted) (RGD1565575_predicted), mRNA [Source:RefSeq_dna;Acc:XR_009286] [ENSRNOT00000017984]		FALSE
A_42_P600777	0.0465765	0.0057335	0.318487	0.106318	-0.159267	0.608965	0.525791	NM_139109	Xab2	Rattus norvegicus XPA binding protein 2 (Xab2), mRNA [NM_139109]	NM_139109	FALSE
A_44_P442161	0.048057	0.00615688	0.60022	0.458816	0.683087	1.4312	1.64689	ENSRNOT00000024914	Ppp2r4_predicted	AI231775 EST228463 Normalized rat heart, Bento Soares Rattus sp. cDNA clone RHECO15 3' end, mRNA sequence [AI231775]		FALSE
A_44_P411392	0.0338452	0.00254571	-0.175238	-0.412172	-1.00933	0.113338	0.116301	DV726507	DV726507	RVL18847 Wackym-Soares normalized rat vestibular cDNA library Rattus norvegicus cDNA 5', mRNA sequence [DV726507]	DV726507	FALSE
A_44_P534113	0.0220056	0.000614864	-0.344115	-0.517224	-0.784283	-0.056446	0.0874342	NM_053866	Plaa	Rattus norvegicus phospholipase A2, activating protein (Plaa), mRNA [NM_053866]	NM_053866	FALSE
A_44_P161296	0.035254	0.00292762	0.502799	0.0245507	0.191762	0.820717	0.938164	ENSRNOT00000022122	ENSRNOT00000022122	similar to glyceraldehyde-3-phosphate dehydrogenase (predicted) (RGD1561804_predicted), mRNA [Source:RefSeq_dna;Acc:XR_007534] [ENSRNOT00000022122]		FALSE
A_44_P336075	0.0359961	0.00312776	0.800489	0.66473	0.191771	-0.0341767	-0.0629491	ENSRNOT00000011954	RGD1306100_predicted	PREDICTED: Rattus norvegicus similar to RRP22 (predicted) (RGD1306100_predicted), mRNA [XM_344259]		FALSE
A_42_P666259	0.0271376	0.00130617	-0.0435382	-0.454144	-1.09041	-0.562874	-0.694264	NM_001009661	Wbp11	Rattus norvegicus WW domain binding protein 11 (Wbp11), mRNA [NM_001009661]	NM_001009661	FALSE
A_42_P761516	0.0435541	0.00497044	0.36344	-0.271891	-0.862274	0.294046	0.153498	ENSRNOT00000037389	Myst3	Histone acetyltransferase MYST3 (EC 2.3.1.48) (EC 2.3.1.-) (MYST protein 3) (MOZ, YBF2/SAS3, SAS2 and TIP60 protein 3) (Monocytic leukemia zinc finger protein) (Monocytic leukemia zinc finger homolog). [Source:Uniprot/SWISSPROT;Acc:Q5TKR9]...		FALSE
A_44_P349356	0.0182041	0.000126749	-0.239313	-0.522904	-0.745225	0.447607	0.516493	XM_219500	Tnpo1	Rattus norvegicus similar to karyopherin beta 2; importin beta 2; transportin; M9 region interaction protein (LOC309126), mRNA [XM_219500]	XM_219500	FALSE
A_43_P17410	0.0332498	0.00242	0.461522	0.0109437	-0.0119827	0.576034	0.655792	ENSRNOT00000060770	ENSRNOT00000060770	AW141874 EST291989 Normalized rat ovary, Bento Soares Rattus sp. cDNA clone RGICN23 5' end similar to H.sapiens hypothetical protein KIAA0261, mRNA sequence [AW141874]		FALSE
A_44_P1034637	0.0463703	0.00564748	0.0415705	0.288697	0.371646	-0.397365	0.0527926	NM_001012068	Uros	Rattus norvegicus uroporphyrinogen III synthase (Uros), mRNA [NM_001012068]	NM_001012068	FALSE
A_44_P186493	0.018484	0.000211066	0.269085	-0.0665362	0.111665	0.846001	1.08993	ENSRNOT00000026514	ENSRNOT00000026514	Rattus norvegicus similar to KIAA1089 protein (LOC310627), mRNA [XM_227399]		FALSE
A_44_P254254	0.0398415	0.00407948	0.0608125	-0.265185	-0.531339	-0.250261	-0.391644	AI013204	AI013204	AI013204 EST207879 Normalized rat spleen, Bento Soares Rattus sp. cDNA clone RSPBI06 3' end, mRNA sequence [AI013204]	AI013204	FALSE
A_44_P377653	0.0477811	0.00609624	0.213884	-0.238833	-0.423663	0.413997	0.535596	A_44_P377653	A_44_P377653			FALSE
A_44_P169917	0.047391	0.00595731	-0.0152988	0.0422502	-0.146105	-0.767495	-0.952586	AA848948	AA848948	AA848948 EST191710 Normalized rat lung, Bento Soares Rattus sp. cDNA clone RLUAI29 3' end, mRNA sequence [AA848948]	AA848948	FALSE
A_43_P16589	0.0250039	0.000944025	-0.0183243	-0.519217	-0.610619	0.419311	0.605496	CF110262	CF110262	Shultzomica03513 Rat lung airway and parenchyma cDNA libraries Rattus norvegicus cDNA clone Contig3105 5', mRNA sequence [CF110262]	CF110262	FALSE
A_44_P487162	0.018484	0.000170735	-0.406823	-0.638021	-0.542997	0.589144	0.433111	ENSRNOT00000025104	ENSRNOT00000025104	Ras-related protein Rab-6A (Rab-6) (Fragment). [Source:Uniprot/SWISSPROT;Acc:Q9WVB1] [ENSRNOT00000025104]		FALSE
A_43_P19211	0.0284005	0.00150809	-0.023445	-0.565751	-1.04213	0.191325	0.130379	ENSRNOT00000035770	Rbbp6	Rbbp6 protein (Fragment). [Source:Uniprot/SPTREMBL;Acc:Q5EB85] [ENSRNOT00000035770]		FALSE
A_44_P806854	0.0386656	0.0037396	-0.126547	0.218993	0.489203	-0.579117	-0.224079	TC644858	TC644858	MMU59509 mlrq-like protein {Mus musculus} (exp=-1; wgp=0; cg=0), partial (21%) [TC644858]		FALSE
A_44_P297763	0.0350961	0.00288435	0.257359	0.726613	1.85286	0.120111	0.299945	ENSRNOT00000049456	ENSRNOT00000049456	similar to Y-linked testis-specific protein (LOC503334), mRNA [Source:RefSeq_dna;Acc:XR_006251] [ENSRNOT00000049456]		FALSE
A_44_P427695	0.0169258	2.92006e-05	-0.515781	-0.252549	-0.225394	0.813867	0.749705	NM_001009683	Tor3a	Rattus norvegicus torsin family 3, member A (Tor3a), mRNA [NM_001009683]	NM_001009683	FALSE
A_44_P445306	0.0231147	0.000769093	0.419443	0.2713	0.203192	1.15778	1.0799	NM_053517	Shc1	Rattus norvegicus src homology 2 domain-containing transforming protein C1 (Shc1), mRNA [NM_053517]	NM_053517	FALSE
A_44_P537024	0.0328369	0.00232915	-0.29525	-0.576343	-0.687941	0.246728	0.232292	BC133726	RGD1560410_predicted	Rattus norvegicus cDNA clone MGC:156736 IMAGE:7104339, complete cds [BC133726]	BC133726	FALSE
A_44_P879588	0.041734	0.00448101	-0.54082	-0.033351	0.368256	-0.657412	-0.620152	BG057530	BG057530	BG057530 nag14a03.x1 NCI_CGAP_Emb2 Rattus norvegicus cDNA clone IMAGE:4175909 3' similar to SW:RL3_RAT P21531 60S RIBOSOMAL PROTEIN L3 ;, mRNA sequence [BG057530]	BG057530	FALSE
A_44_P941682	0.0398218	0.00406857	0.616843	0.678369	0.834732	-0.141973	0.0636444	BM387339	BM387339	UI-R-CN1-cjj-c-03-0-UI.s1 UI-R-CN1 Rattus norvegicus cDNA clone UI-R-CN1-cjj-c-03-0-UI 3', mRNA sequence [BM387339]	BM387339	FALSE
A_42_P538374	0.0332498	0.002417	0.572842	0.0502807	0.0660711	0.798089	1.08279	NM_001014029	RGD1310316	Rattus norvegicus similar to RIKEN cDNA 2900009I07 (RGD1310316), mRNA [NM_001014029]	NM_001014029	FALSE
A_44_P590748	0.0412706	0.00438381	-0.114734	-0.229599	-0.642883	0.400218	0.258956	ENSRNOT00000009620	RGD1560496_predicted	PREDICTED: Rattus norvegicus similar to HELICARD (predicted) (RGD1560496_predicted), mRNA [XM_575141]		FALSE
A_44_P528965	0.0175169	4.82913e-05	-0.0984749	0.112536	-0.248235	-0.867407	-1.1746	AI236332	AI236332	AI236332 EST232894 Normalized rat ovary, Bento Soares Rattus sp. cDNA clone ROVDE29 3' end, mRNA sequence [AI236332]	AI236332	FALSE
A_44_P1031726	0.0206069	0.000432799	-5.49555e-05	-0.26384	-0.131667	0.542935	0.703401	XM_215751	Dnajc10	PREDICTED: Rattus norvegicus DnaJ (Hsp40) homolog, subfamily C, member 10 (Dnajc10), mRNA [XM_215751]	XM_215751	FALSE
A_44_P359957	0.0182041	0.000147285	-0.261852	-0.125427	0.00624895	-0.802855	-0.919604	BU946565	BU946565	703769946J1 RALUTXL01 Rattus norvegicus cDNA, mRNA sequence [BU946565]	BU946565	FALSE
A_43_P11098	0.0323805	0.00224957	-0.136682	-0.707704	-1.20422	-0.206202	-0.256422	NM_053620	Cdc42bpb	Rattus norvegicus Cdc42 binding protein kinase beta (Cdc42bpb), mRNA [NM_053620]	NM_053620	FALSE
A_44_P177914	0.034132	0.00266797	-0.303243	-0.646981	-0.741938	0.305285	0.289577	ENSRNOT00000004927	Nvl_predicted	AW915489 EST346793 Normalized rat embryo, Bento Soares Rattus sp. cDNA clone RGICV94 5' end, mRNA sequence [AW915489]		FALSE
A_44_P458591	0.0433169	0.00486411	0.210552	-0.368269	-0.763335	0.22989	0.298593	CB326471	CB326471	UI-R-DZ0-crq-c-07-0-UI.s1 UI-R-DZ0 Rattus norvegicus cDNA clone UI-R-DZ0-crq-c-07-0-UI 3', mRNA sequence [CB326471]	CB326471	FALSE
A_44_P825558	0.0392406	0.00391113	-0.355117	-0.698126	-0.950534	-0.276265	-0.305964	ENSRNOT00000024891	Ranbp10_predicted	PREDICTED: Rattus norvegicus RAN binding protein 10 (predicted) (Ranbp10_predicted), mRNA [XM_341676]		FALSE
A_44_P447895	0.0243559	0.000879444	0.0695025	-0.305151	-0.359963	0.226357	0.453824	ENSRNOT00000057978	ENSRNOT00000057978	Spg20 protein (Fragment). [Source:Uniprot/SPTREMBL;Acc:Q4FZR7] [ENSRNOT00000057978]		FALSE
A_44_P486972	0.0344795	0.0027443	0.0623118	0.616467	0.88254	-0.0668628	0.013852	NM_017002	Epor	Rattus norvegicus erythropoietin receptor (Epor), mRNA [NM_017002]	NM_017002	FALSE
A_44_P198965	0.0435246	0.00494044	-0.102968	-0.386304	-0.7476	0.0966893	-0.0677074	ENSRNOT00000015488	Zfp592_predicted	Rattus norvegicus similar to Hypothetical zinc finger protein KIAA0211 (LOC293038), mRNA [XM_214975]		FALSE
A_43_P13090	0.0292538	0.00168506	-0.0595785	-0.103356	-0.418787	-0.884983	-0.7681	NM_080888	Bnip3l	Rattus norvegicus BCL2/adenovirus E1B 19 kDa-interacting protein 3-like (Bnip3l), mRNA [NM_080888]	NM_080888	FALSE
A_44_P494543	0.0394364	0.00396343	0.166874	-0.444993	-0.843587	0.541443	0.426122	ENSRNOT00000007776	Cep1_predicted	PREDICTED: Rattus norvegicus centrosomal protein 1 (predicted) (Cep1_predicted), mRNA [XM_231168]		FALSE
A_44_P152508	0.0187658	0.000239521	-0.593454	-0.0669567	0.0456022	-0.754711	-1.15696	BI301192	BI301192	BI301192 UI-R-DK0-cdx-e-02-0-UI.s2 UI-R-DK0 Rattus norvegicus cDNA clone UI-R-DK0-cdx-e-02-0-UI 3', mRNA sequence [BI301192]	BI301192	FALSE
A_42_P826171	0.0403433	0.00418829	-0.321862	0.0233586	-0.0543951	-0.758172	-0.742892	XM_001061833	LOC684993	PREDICTED: Rattus norvegicus hypothetical protein LOC684993 (LOC684993), mRNA [XM_001061833]	XM_001061833	FALSE
A_42_P749968	0.040297	0.00417695	-0.206442	-0.622202	-0.981688	-0.498991	-0.670461	ENSRNOT00000008107	RGD1306862_predicted	PREDICTED: Rattus norvegicus similar to RIKEN cDNA 1200011M11 (predicted) (RGD1306862_predicted), mRNA [XM_213430]		FALSE
A_44_P198349	0.020081	0.000354906	0.513072	-0.0480804	-0.0372781	0.884538	0.919893	NM_024398	Aco2	Rattus norvegicus aconitase 2, mitochondrial (Aco2), mRNA [NM_024398]	NM_024398	FALSE
A_44_P223435	0.0218785	0.000588112	-0.490282	-0.945758	-1.11325	-0.238712	-0.0149232	XM_217022	Kif21a_predicted	PREDICTED: Rattus norvegicus kinesin family member 21A (predicted) (Kif21a_predicted), mRNA [XM_217022]	XM_217022	FALSE
A_44_P379864	0.0460627	0.00559207	-0.123173	0.309866	-0.146364	-1.8059	-2.02863	A_44_P379864	A_44_P379864			FALSE
A_43_P21640	0.0378833	0.0035523	-0.0726042	-0.639639	-0.523769	0.457686	0.654763	BC086332	Adprtl1	Rattus norvegicus ADP-ribosyltransferase (NAD+; poly (ADP-ribose) polymerase)-like 1, mRNA (cDNA clone IMAGE:7301324), complete cds. [BC086332]	BC086332	FALSE
A_44_P477633	0.0407758	0.00428079	0.638896	0.328763	0.598656	1.31048	1.57141	NM_174864	Ncstn	Rattus norvegicus nicastrin (Ncstn), mRNA [NM_174864]	NM_174864	FALSE
A_42_P559337	0.0290421	0.00164454	-0.305979	-0.653262	-0.993923	0.837102	0.184182	AW918097	AW918097	EST349401 Rat gene index, normalized rat, norvegicus, Bento Soares Rattus norvegicus cDNA clone RGIEM31 5' end, mRNA sequence [AW918097]	AW918097	FALSE
A_44_P348778	0.0336865	0.00250758	0.487357	-0.0521755	-0.0946939	0.410174	0.812709	AW917950	AW917950	AW917950 EST349254 Rat gene index, normalized rat, norvegicus, Bento Soares Rattus norvegicus cDNA clone RGIEK49 5' end, mRNA sequence [AW917950]	AW917950	FALSE
A_43_P18409	0.0429979	0.00478988	0.289839	0.0752663	-0.0768871	1.08792	1.0204	XM_223362	RGD1311593_predicted	PREDICTED: Rattus norvegicus similar to RIKEN cDNA 5033405K12 (predicted) (RGD1311593_predicted), mRNA [XM_223362]	XM_223362	FALSE
A_44_P302996	0.0216274	0.000556975	0.261461	0.315264	0.384641	-0.293961	-0.449504	ENSRNOT00000021857	RGD1562968_predicted	PREDICTED: Rattus norvegicus similar to Single-stranded DNA-binding protein 2 (Sequence-specific single-stranded-DNA-binding protein 2) (predicted) (RGD1562968_predicted), mRNA [XM_342171]		FALSE
A_44_P618177	0.0300599	0.00183395	-0.300032	-0.564629	-0.864665	0.0740622	0.0709256	CF110664	CF110664	Shultzomica03915 Rat lung airway and parenchyma cDNA libraries Rattus norvegicus cDNA clone Contig3470 5', mRNA sequence [CF110664]	CF110664	FALSE
A_44_P114774	0.034371	0.00271592	0.612271	-0.0422713	-0.223927	0.673165	0.701315	ENSRNOT00000010986	RGD1563028_predicted	Rattus norvegicus similar to DIP13 beta (LOC362860), mRNA [XM_343190]		FALSE
A_44_P512728	0.0446556	0.0052124	0.0276793	-0.404377	-0.493152	0.339576	0.266033	NM_001012147	Pxn	Rattus norvegicus paxillin (Pxn), mRNA [NM_001012147]	NM_001012147	FALSE
A_44_P774946	0.018484	0.000211666	-0.109884	-0.401482	-0.64704	-0.549594	-0.614774	AW143545	AW143545	AW143545 EST293750 Normalized rat brain, Bento Soares Rattus sp. cDNA clone RGIBP94 5' end, mRNA sequence [AW143545]	AW143545	FALSE
A_44_P699780	0.0385671	0.00371448	0.0238286	-0.453456	-0.905264	0.573062	0.598257	DN934467	DN934467	AGENCOURT_50136625 NCI_CGAP_Pr50 Rattus norvegicus cDNA clone IMAGE:7936590 5', mRNA sequence [DN934467]	DN934467	FALSE
A_44_P267294	0.0456974	0.00548572	0.150952	0.185255	0.141337	0.715527	0.882308	ENSRNOT00000017871	RGD1562018_predicted	PREDICTED: Rattus norvegicus similar to Protein C14orf101 homolog (predicted) (RGD1562018_predicted), mRNA [XM_341306]		FALSE
A_44_P219919	0.023831	0.000827161	0.0527638	-0.187811	-0.128854	0.684694	0.934416	ENSRNOT00000009500	Psme4	Psme4 protein. [Source:Uniprot/SPTREMBL;Acc:Q5EAP2] [ENSRNOT00000009500]		FALSE
A_42_P543694	0.0278556	0.00142098	-0.340732	-0.687982	-1.09907	-0.679464	-0.793438	X53232	PORF-2	Rat mRNA for preoptic regulatory factor-2 (PORF-2). [X53232]	X53232	FALSE
A_43_P14616	0.018484	0.000222561	-0.210131	-0.167087	-0.722614	-0.954725	-0.898835	DV727304	DV727304	RVL19778 Wackym-Soares normalized rat vestibular cDNA library Rattus norvegicus cDNA 5', mRNA sequence [DV727304]	DV727304	FALSE
A_44_P339297	0.0373283	0.00338233	-0.330504	-0.963676	-1.03375	-0.0912397	0.025182	DV715460	DV715460	RVL5123 Wackym-Soares normalized rat vestibular cDNA library Rattus norvegicus cDNA 5', mRNA sequence [DV715460]	DV715460	FALSE
A_44_P311988	0.0465975	0.00574325	0.437507	-0.24324	-0.208526	0.528081	0.432167	ENSRNOT00000035826	RGD1304563_predicted	PREDICTED: Rattus norvegicus similar to RIKEN cDNA 4831426I19 (predicted), transcript variant 1 (RGD1304563_predicted), mRNA [XM_001069093]		FALSE
A_44_P119215	0.0196408	0.000309055	-0.436304	-0.39732	-0.494722	0.68058	0.721961	ENSRNOT00000015573	Tbl1xr1_predicted	Rattus norvegicus similar to nuclear receptor co-repressor/HDAC3 complex subunit; TBL1-related protein 1 (LOC365755), mRNA [XM_345195]		FALSE
A_44_P508434	0.0283256	0.00149384	0.318139	-0.0700645	-0.314143	-0.0408	-0.0511864	NM_031522	Neu1	Rattus norvegicus neuraminidase 1 (Neu1), mRNA [NM_031522]	NM_031522	FALSE
A_44_P1041179	0.0478781	0.00611567	0.0723846	-0.52035	-1.00685	0.47171	0.141807	ENSRNOT00000056736	Ep400	PREDICTED: Rattus norvegicus E1A binding protein p400 (Ep400), mRNA [XM_222251]		FALSE
A_44_P345136	0.0197154	0.000319502	0.347989	-0.45668	-0.413396	1.41059	1.41679	ENSRNOT00000003777	Spag9_predicted	Rattus norvegicus similar to JNK-associated leucine-zipper protein (LOC360600), mRNA [XM_340879]		FALSE
A_44_P452133	0.0342343	0.00269528	0.0507247	-0.580226	-0.761559	1.55196	1.35845	NM_031819	Fath	Rattus norvegicus fat tumor suppressor homolog (Drosophila) (Fath), mRNA [NM_031819]	NM_031819	FALSE
A_43_P21033	0.0319692	0.00216415	0.179475	0.12279	0.344076	0.701526	0.836858	ENSRNOT00000020909	Smyd5_predicted	Rattus norvegicus similar to NN8-4AG (LOC312503), mRNA [XM_232134]		FALSE
A_44_P402645	0.0465765	0.00573354	-0.132461	-0.371502	-0.49228	-0.0364443	0.22933	NM_053316	Ihpk1	Rattus norvegicus inositol hexaphosphate kinase 1 (Ihpk1), mRNA [NM_053316]	NM_053316	FALSE
A_44_P869077	0.020908	0.000505073	0.0442077	-0.210583	-0.405125	0.623578	0.714273	CN541273	CN541273	UI-R-DZ0-cmz-a-24-0-UI.s1 UI-R-DZ0 Rattus norvegicus cDNA clone UI-R-DZ0-cmz-a-24-0-UI 3', mRNA sequence [CN541273]	CN541273	FALSE
A_44_P147622	0.0216955	0.000571795	-0.0856491	-0.712855	-0.846289	0.323619	0.288763	XM_343462	Dnajc13_predicted	Rattus norvegicus similar to mKIAA0678 protein (LOC363127), mRNA [XM_343462]	XM_343462	FALSE
A_43_P11776	0.0182041	0.000101529	-0.571561	-0.47531	-0.0613978	1.07443	1.47292	NM_017014	Gstm1	Rattus norvegicus glutathione S-transferase, mu 1 (Gstm1), mRNA [NM_017014]	NM_017014	FALSE
A_43_P18601	0.035254	0.0029246	0.167387	-0.438963	-1.03231	0.108681	-0.0305077	ENSRNOT00000035770	Rbbp6	Rbbp6 protein (Fragment). [Source:Uniprot/SPTREMBL;Acc:Q5EB85] [ENSRNOT00000035770]		FALSE
A_44_P158768	0.0265174	0.00120205	0.509987	-0.105355	-0.0369059	1.16422	1.36172	ENSRNOT00000048905	Supt5h	Rattus norvegicus (clone REM3) ORF (Fragment). [Source:Uniprot/SPTREMBL;Acc:Q63403] [ENSRNOT00000048905]		FALSE
A_44_P433773	0.0338452	0.00257229	0.577673	0.0938616	-0.00513399	0.729992	0.797959	ENSRNOT00000006148	Traf6_predicted	PREDICTED: Rattus norvegicus Tnf receptor-associated factor 6 (predicted) (Traf6_predicted), mRNA [XM_230377]		FALSE
A_44_P378562	0.0270761	0.00127952	0.128311	0.0433089	-0.0416048	-0.941186	-0.858571	AA964011	AA964011	UI-R-C0-gu-b-05-0-UI.s1 UI-R-C0 Rattus norvegicus cDNA clone UI-R-C0-gu-b-05-0-UI 3', mRNA sequence [AA964011]	AA964011	FALSE
A_44_P276951	0.0335853	0.00248041	0.196889	-0.271915	-0.281941	0.923611	0.763781	XM_232771	RGD1564762_predicted	PREDICTED: Rattus norvegicus similar to erythrocyte membrane protein band 4.1 (elliptocytosis 1, RH-linked) isoform 1 (predicted) (RGD1564762_predicted), mRNA [XM_232771]	XM_232771	FALSE
A_44_P136857	0.0383487	0.00366355	-0.0904387	-0.900579	-1.1033	-0.0463771	-0.100514	XM_237286	LOC301509	PREDICTED: Rattus norvegicus similar to tensin (LOC301509), mRNA [XM_237286]	XM_237286	FALSE
A_44_P297119	0.02279	0.00072497	0.521356	0.18607	0.208515	0.946729	1.05254	NM_057140	Ppp2r1a	Rattus norvegicus protein phosphatase 2 (formerly 2A), regulatory subunit A (PR 65), alpha isoform (Ppp2r1a), mRNA [NM_057140]	NM_057140	FALSE
A_43_P21699	0.020081	0.000333346	-0.236717	-0.415349	-0.245627	0.250884	0.436511	NM_001005883	Pi4k2b	Rattus norvegicus phosphatidylinositol 4-kinase type 2 beta (Pi4k2b), mRNA [NM_001005883]	NM_001005883	FALSE
A_44_P475661	0.0252274	0.000970892	0.151862	-0.0220473	-0.165754	0.569694	0.852486	ENSRNOT00000005715	RGD1308014_predicted	PREDICTED: Rattus norvegicus similar to DKFZP434B168 protein (predicted) (RGD1308014_predicted), mRNA [XM_223075]		FALSE
A_44_P697681	0.0182041	0.000121322	0.399937	-0.0806157	-0.070143	0.997939	1.02932	CO403545	CO403545	AGENCOURT_27823071 NIH_MGC_252 Rattus norvegicus cDNA clone IMAGE:7307544 5', mRNA sequence [CO403545]	CO403545	FALSE
A_44_P1024165	0.0378983	0.00357572	-0.0396531	-0.36187	-0.784068	-0.0176026	-0.0813729	AW915150	AW915150	AW915150 EST346454 Normalized rat embryo, Bento Soares Rattus sp. cDNA clone RGICL20 5' end, mRNA sequence [AW915150]	AW915150	FALSE
A_44_P928419	0.0336677	0.00249641	-0.568219	-0.863372	-1.26733	0.242208	0.219609	ENSRNOT00000060958	ENSRNOT00000060958	Mdn1 protein (Fragment). [Source:Uniprot/SPTREMBL;Acc:Q5RJZ0] [ENSRNOT00000060958]		FALSE
A_44_P220032	0.0481196	0.00617367	0.088115	-0.1023	-0.322233	0.716844	0.561424	NM_001006996	Ddx18	Rattus norvegicus DEAD (Asp-Glu-Ala-Asp) box polypeptide 18 (Ddx18), mRNA [NM_001006996]	NM_001006996	FALSE
A_44_P499242	0.020081	0.000336909	-0.277815	-0.389914	-0.534187	0.126536	0.150577	XM_226008	XM_226008	Rattus norvegicus similar to histidyl-tRNA synthetase (LOC307492), mRNA [XM_226008]	XM_226008	FALSE
A_44_P975286	0.0262056	0.0011311	-0.365724	-0.609436	-0.712887	0.358427	0.407356	CO403766	CO403766	AGENCOURT_26747151 NIH_MGC_255 Rattus norvegicus cDNA clone IMAGE:7318617 5', mRNA sequence [CO403766]	CO403766	FALSE
A_44_P483313	0.0369718	0.00329066	-0.00741684	-0.162355	0.111873	0.617301	0.933237	NM_001009369	Mrpl38	Rattus norvegicus mitochondrial ribosomal protein L38 (Mrpl38), mRNA [NM_001009369]	NM_001009369	FALSE
A_44_P389642	0.0371322	0.00333931	0.499209	0.221633	-0.0401936	0.47007	0.632493	ENSRNOT00000003888	Nagpa_predicted	Rattus norvegicus similar to N-acetylglucosamine-1-phosphodiester alpha-N-acetylglucosaminidase; mannose 6-phosphate-uncovering enzyme (LOC360476), mRNA [XM_340751]		FALSE
A_44_P166501	0.020908	0.000508061	0.110224	-0.585427	-0.54296	0.479426	0.499626	NM_001012199	Rangap1	Rattus norvegicus RAN GTPase activating protein 1 (Rangap1), mRNA [NM_001012199]	NM_001012199	FALSE
A_42_P642507	0.0390243	0.00384787	-0.0252784	-0.293725	-0.801854	-0.118621	-0.252173	ENSRNOT00000037829	LOC288526	LOC288526 protein (Fragment). [Source:Uniprot/SPTREMBL;Acc:Q496Y9] [ENSRNOT00000037829]		FALSE
A_44_P622138	0.0218785	0.000591312	-1.09718	-1.04424	-0.693186	0.515694	0.504594	TC592876	TC592876			FALSE
A_44_P684779	0.0313758	0.00206349	0.216677	-0.244343	-0.730092	0.313636	0.0982243	XM_001078065	LOC691396	PREDICTED: Rattus norvegicus similar to Zinc finger protein 551 (Zinc finger protein KOX23) (LOC691396), mRNA [XM_001078065]	XM_001078065	FALSE
A_44_P1004617	0.0444537	0.00516933	0.0114189	-0.112303	-0.196467	-0.834211	-0.426163	ENSRNOT00000051522	ENSRNOT00000051522	Tusc4 protein (Fragment). [Source:Uniprot/SPTREMBL;Acc:Q5XID9] [ENSRNOT00000051522]		FALSE
A_44_P975235	0.0323252	0.00222285	-0.250748	-0.649467	-1.13166	-0.632012	-0.577409	NM_001034835	RGD1309220	Rattus norvegicus similar to RIKEN cDNA 4632411B12 (RGD1309220), mRNA [NM_001034835]	NM_001034835	FALSE
A_44_P395305	0.0359419	0.00309441	-0.564638	-0.278513	-0.101824	-0.992612	-0.604949	AA945608	AA945608	AA945608 EST201107 Normalized rat liver, Bento Soares Rattus sp. cDNA clone RLIAP69 3' end, mRNA sequence [AA945608]	AA945608	FALSE
A_43_P15890	0.0397219	0.00405018	0.159451	-0.0855193	-0.088256	0.402204	0.527536	NM_031567	Nfic	Rattus norvegicus nuclear factor I/C (Nfic), mRNA [NM_031567]	NM_031567	FALSE
A_44_P522994	0.0286568	0.00155504	-0.0199137	-0.339643	-0.523229	0.239677	0.111769	ENSRNOT00000023146	Malt1_predicted	PREDICTED: Rattus norvegicus mucosa associated lymphoid tissue lymphoma translocation gene 1 (predicted) (Malt1_predicted), mRNA [XM_225927]		FALSE
A_44_P253059	0.0435541	0.00497209	0.283554	-0.101821	-0.244239	0.911542	1.01996	ENSRNOT00000018061	LOC310756	PREDICTED: Rattus norvegicus similar to Moloney leukemia virus 10 (LOC310756), mRNA [XM_227549]		FALSE
A_44_P167452	0.0235609	0.000808052	-0.202608	-0.163106	-0.102023	-0.593423	-0.583264	CF111195	CF111195	Shultzomica04446 Rat lung airway and parenchyma cDNA libraries Rattus norvegicus cDNA clone Contig3938 5', mRNA sequence [CF111195]	CF111195	FALSE
A_43_P11543	0.0464271	0.00566344	-0.332585	0.173372	-0.384724	-0.770169	-1.43303	NM_012745	Klrd1	Rattus norvegicus killer cell lectin-like receptor, subfamily D, member 1 (Klrd1), mRNA [NM_012745]	NM_012745	FALSE
A_44_P246311	0.0200759	0.00033155	0.157728	-0.114138	-0.00166905	1.17849	0.925502	NM_001017473	MGC112682	Rattus norvegicus similar to RIKEN cDNA 0610039K22 (MGC112682), mRNA [NM_001017473]	NM_001017473	FALSE
A_44_P377722	0.0429979	0.0047876	-0.0937395	-0.0697782	-0.00787675	0.544926	0.605938	NM_001007651	Peflin	Rattus norvegicus PEF protein with a long N-terminal hydrophobic domain (Peflin), mRNA [NM_001007651]	NM_001007651	FALSE
A_44_P1034030	0.00771489	2.79716e-06	-0.147094	-0.853295	-1.04635	0.110681	0.119342	ENSRNOT00000009440	Aff4_predicted	Rattus norvegicus similar to putative transcription factor ALF-4 (LOC303132), mRNA [XM_220420]		FALSE
A_44_P356513	0.0475632	0.006043	0.548424	0.188916	0.0210408	-0.188251	-0.225772	ENSRNOT00000024245	RGD1306601_predicted	PREDICTED: Rattus norvegicus similar to cDNA sequence BC019755 (predicted) (RGD1306601_predicted), mRNA [XM_230527]		FALSE
A_43_P12301	0.0461066	0.00560188	-0.102887	0.357035	0.438022	-0.199619	-0.116717	NM_022695	Ntsr2	Rattus norvegicus neurotensin receptor 2 (Ntsr2), mRNA [NM_022695]	NM_022695	FALSE
A_44_P170864	0.038671	0.0037471	-0.192125	-0.536285	-0.674298	0.125027	0.155282	ENSRNOT00000056944	RGD1311920_predicted	PREDICTED: Rattus norvegicus similar to RIKEN cDNA 9130023F12 gene (predicted) (RGD1311920_predicted), mRNA [XM_223651]		FALSE
A_44_P976703	0.0190992	0.000273913	0.769985	-0.0180798	-0.536426	-1.85475	-1.4192	BF564180	BF564180	UI-R-C4-ali-h-02-0-UI.r1 UI-R-C4 Rattus norvegicus cDNA clone UI-R-C4-ali-h-02-0-UI 5', mRNA sequence [BF564180]	BF564180	FALSE
A_43_P18879	0.0256092	0.00101956	0.597021	0.0741193	-0.102922	0.411662	0.742693	NM_001034933	Arsa	Rattus norvegicus arylsulfatase A (Arsa), mRNA [NM_001034933]	NM_001034933	FALSE
A_44_P265965	0.0222218	0.000671071	0.240945	0.00361067	-0.282138	0.124167	0.22036	NM_031360	Smpd2	Rattus norvegicus sphingomyelin phosphodiesterase 2, neutral (Smpd2), mRNA [NM_031360]	NM_031360	FALSE
A_44_P159500	0.0464426	0.00567415	-0.394109	-0.0712726	-0.803055	-0.546513	-0.734096	NM_001009714	RGD1307700	Rattus norvegicus similar to hypothetical protein BC018453 (RGD1307700), mRNA [NM_001009714]	NM_001009714	FALSE
A_44_P263801	0.0216955	0.000566369	-0.793851	-0.325777	-0.14423	-0.981234	-0.978802	BM390456	BM390456	BM390456 UI-R-CN1-cjq-f-10-0-UI.s1 UI-R-CN1 Rattus norvegicus cDNA clone UI-R-CN1-cjq-f-10-0-UI 3', mRNA sequence [BM390456]	BM390456	FALSE
A_44_P374305	0.0268011	0.00123649	-0.257577	-0.248324	-0.178708	-1.11955	-0.784723	AI411279	AI411279	AI411279 EST239573 Normalized rat kidney, Bento Soares Rattus sp. cDNA clone RKIEO55 3' end, mRNA sequence [AI411279]	AI411279	FALSE
A_44_P684922	0.0378833	0.00355644	-0.209934	-0.482891	-0.736054	0.437375	0.270829	XM_220420	Aff4_predicted	PREDICTED: Rattus norvegicus AF4 [XM_220420]	XM_220420	FALSE
A_44_P484902	0.0338452	0.00255103	-0.276949	-0.347567	-0.394167	0.139327	0.235722	NM_017231	Pitpna	Rattus norvegicus phosphatidylinositol transfer protein, alpha (Pitpna), mRNA [NM_017231]	NM_017231	FALSE
A_44_P142318	0.0312351	0.00204673	0.279716	-0.307816	-0.237131	0.782915	0.799566	ENSRNOT00000001729	Anapc7_predicted	PREDICTED: Rattus norvegicus anaphase promoting complex subunit 7 (predicted) (Anapc7_predicted), mRNA [XM_222171]		FALSE
A_44_P292115	0.0366551	0.00323428	-0.0360012	-0.339218	-0.970431	-1.02993	-0.867022	AW532136	AW532136	AW532136 UI-R-C4-ali-g-03-0-UI.s1 UI-R-C4 Rattus norvegicus cDNA clone UI-R-C4-ali-g-03-0-UI 3', mRNA sequence [AW532136]	AW532136	FALSE
A_43_P11753	0.0252748	0.000978019	0.239528	0.215612	0.225951	0.610602	0.842885	NM_013214	Acot7	Rattus norvegicus acyl-CoA thioesterase 7 (Acot7), mRNA [NM_013214]	NM_013214	FALSE
A_44_P995959	0.0182041	0.000120927	-0.0897799	-0.32587	-0.560438	0.26076	0.336846	NM_001011895	Htf9c	Rattus norvegicus HpaII tiny fragments locus 9c (Htf9c), mRNA [NM_001011895]	NM_001011895	FALSE
A_44_P910533	0.0484148	0.00626279	-0.19771	-0.633426	-0.70921	0.472511	0.235061	XM_343671	LOC363333	PREDICTED: Rattus norvegicus similar to Chromatin assembly factor 1 subunit A (CAF-1 subunit A) (Chromatin assembly factor I p150 subunit) (CAF-I 150 kDa subunit) (CAF-Ip150) (LOC363333), mRNA [XM_343671]	XM_343671	FALSE
A_44_P426591	0.031567	0.00210566	0.689844	0.125696	0.291587	0.877063	1.08098	BC087069	BC087069	Rattus norvegicus cDNA clone MGC:94360 IMAGE:7133371, complete cds. [BC087069]	BC087069	FALSE
A_43_P16831	0.0420114	0.00453013	-0.0874109	-0.506002	-0.726858	-0.247193	-0.210576	XM_232055	XM_232055	Rattus norvegicus similar to inner membrane protein, mitochondrial (mitofilin); motor protein (LOC312444), mRNA [XM_232055]	XM_232055	FALSE
A_42_P518620	0.0429806	0.00477609	-0.242969	-0.541822	-1.02439	-0.236179	-0.538841	AA955618	AA955618	UI-R-E1-fb-b-07-0-UI.s1 UI-R-E1 Rattus norvegicus cDNA clone UI-R-E1-fb-b-07-0-UI 3' similar to gi [AA955618]	AA955618	FALSE
A_44_P1026431	0.0484148	0.0062712	-0.110509	-0.644977	-0.92876	0.16317	0.00200832	ENSRNOT00000016351	Xrn2_predicted	PREDICTED: Rattus norvegicus 5'-3' exoribonuclease 2 (predicted) (Xrn2_predicted), mRNA [XM_342535]		FALSE
A_42_P524577	0.0394762	0.0039732	0.184879	0.424235	0.798945	-0.0387248	-0.015077	NM_053865	Rtn1	Rattus norvegicus reticulon 1 (Rtn1), mRNA [NM_053865]	NM_053865	FALSE
A_44_P103972	0.04155	0.00445081	-0.36562	-0.00672382	0.0123628	-0.789964	-0.576336	AI410264	AI410264	AI410264 EST238557 Normalized rat kidney, Bento Soares Rattus sp. cDNA clone RKIDX08 3' end, mRNA sequence [AI410264]	AI410264	FALSE
A_44_P744309	0.0279719	0.00145126	0.246386	-0.0670899	-0.0644244	0.888065	1.01644	ENSRNOT00000061743	LOC683847			FALSE
A_43_P10596	0.0323292	0.00223038	-0.0713332	-0.521521	-0.637507	-1.14493	-1.51349	TC633965	TC633965	Q7TPK9_RAT (Q7TPK9) Ac2-008, partial (6%) [TC633965]		FALSE
A_44_P975355	0.0265174	0.00119101	-0.374118	-0.3366	-0.57428	-1.29632	-1.09669	AI178492	AI178492	EST222166 Normalized rat placenta, Bento Soares Rattus sp. cDNA clone RPLCR72 3' end, mRNA sequence [AI178492]	AI178492	FALSE
A_44_P714927	0.0182041	0.000135403	0.163869	-0.0945803	-0.676041	-0.334675	-0.623698	TC581696	TC581696			FALSE
A_44_P349702	0.0475632	0.00603052	-0.454859	-0.0624294	-0.228994	-0.975058	-0.993159	BI289146	BI289146	UI-R-DK0-cfm-a-08-0-UI.s1 UI-R-DK0 Rattus norvegicus cDNA clone UI-R-DK0-cfm-a-08-0-UI 3', mRNA sequence [BI289146]	BI289146	FALSE
A_44_P191055	0.0256092	0.00101614	-0.166668	-0.563825	-0.893781	-0.0618602	-0.0390296	XM_227475	Pogz_predicted	PREDICTED: Rattus norvegicus pogo transposable element with ZNF domain (predicted) (Pogz_predicted), mRNA [XM_227475]	XM_227475	FALSE
A_44_P156433	0.0434906	0.00492506	0.161028	-0.481385	-0.641764	0.104501	0.309392	NM_053864	Vcp	Rattus norvegicus valosin-containing protein (Vcp), mRNA [NM_053864]	NM_053864	FALSE
A_44_P536282	0.0435541	0.00497162	-0.236054	-0.830599	-0.833686	0.177529	0.275735	NM_001013130	Spnb2	Rattus norvegicus spectrin beta 2 (Spnb2), mRNA [NM_001013130]	NM_001013130	FALSE
A_44_P942903	0.025968	0.00109895	-0.329624	-0.579626	-0.721686	0.0825136	0.104322	ENSRNOT00000012005	Mpp5_predicted	PREDICTED: Rattus norvegicus membrane protein, palmitoylated 5 (MAGUK p55 subfamily member 5) (predicted) (Mpp5_predicted), mRNA [XM_234328]		FALSE
A_44_P452486	0.0208809	0.000491036	-0.239431	-0.608423	-0.969745	0.188198	0.163699	ENSRNOT00000031224	ENSRNOT00000031224	Rattus norvegicus similar to IDN3 protein isoform A (LOC294787), mRNA [XM_238213]		FALSE
A_44_P1010281	0.0429979	0.00479325	-0.27105	-0.866664	-1.36309	-0.438162	-0.595806	XM_341279	RGD1309414_predicted	PREDICTED: Rattus norvegicus similar to KIAA0913 protein (predicted) (RGD1309414_predicted), mRNA [XM_341279]	XM_341279	FALSE
A_44_P874141	0.0182041	8.61437e-05	-0.0668988	-0.05835	-0.329826	-0.660259	-0.86717	AI137494	AI137494	AI137494 UI-R-C2p-ol-h-11-0-UI.s1 UI-R-C2p Rattus norvegicus cDNA clone UI-R-C2p-ol-h-11-0-UI 3', mRNA sequence [AI137494]	AI137494	FALSE
A_44_P1024965	0.0386812	0.0037569	-0.200855	-0.370548	-0.463282	0.108506	0.330574	NM_001008339	Whsc2	Rattus norvegicus Wolf-Hirschhorn syndrome candidate 2 (human) (Whsc2), mRNA [NM_001008339]	NM_001008339	FALSE
A_44_P379280	0.0466544	0.00576162	-0.0574256	-0.368189	-0.689854	-0.338649	-0.240153	ENSRNOT00000006779	Cnot2	CCR4-NOT transcription complex, subunit 2 [Source:RefSeq_peptide;Acc:NP_001011988] [ENSRNOT00000006779]		FALSE
A_44_P622684	0.0375609	0.00344374	-0.313254	-0.670149	-1.08702	-0.38094	-0.785736	DV725142	DV725142	RVL17256 Wackym-Soares normalized rat vestibular cDNA library Rattus norvegicus cDNA 5', mRNA sequence [DV725142]	DV725142	FALSE
A_44_P398641	0.0378983	0.00357821	-0.867761	1.14721	1.29982	-1.133	-1.58738	XM_217515	XM_217515	Rattus norvegicus similar to RIKEN cDNA 4933431D05 (LOC301986), mRNA [XM_217515]	XM_217515	FALSE
A_44_P1012870	0.0309922	0.00199718	-0.308299	-0.11499	-0.454059	-0.771356	-0.789905	XM_217391	RGD1309095_predicted	PREDICTED: Rattus norvegicus similar to hypothetical protein BC015148 (predicted) (RGD1309095_predicted), mRNA [XM_217391]	XM_217391	FALSE
A_44_P331142	0.0258511	0.00108558	-0.225979	-0.605758	-0.884791	0.489014	0.386086	BC086519	BC086519	Rattus norvegicus cDNA clone IMAGE:7302535, with apparent retained intron [BC086519]	BC086519	FALSE
A_44_P515170	0.0203779	0.000368306	0.0618725	-0.616651	-0.588053	0.174928	0.439946	NM_181480	Nadsyn1	Rattus norvegicus NAD synthetase 1 (Nadsyn1), mRNA [NM_181480]	NM_181480	FALSE
A_42_P492082	0.0487473	0.00636681	-0.116354	-0.238806	-0.179865	0.0890292	0.253261	NM_001012088	Pex16	Rattus norvegicus peroxisome biogenesis factor 16 (Pex16), mRNA [NM_001012088]	NM_001012088	FALSE
A_44_P175786	0.0209054	0.000494959	-0.0464335	-0.273756	-0.288511	0.71841	0.787133	XM_228865	XM_228865	Rattus norvegicus similar to hypothetical protein FLJ10613 (LOC317417), mRNA [XM_228865]	XM_228865	FALSE
A_44_P483358	0.0424942	0.00467235	-0.612416	-0.898	-0.706864	-0.133613	0.119382	BG666558	BG666558	BG666558 DRABND04 Rat DRG Library Rattus norvegicus cDNA clone DRABND04 5', mRNA sequence [BG666558]	BG666558	FALSE
A_44_P361075	0.0355924	0.00303958	0.693677	0.126501	0.337973	0.883112	1.09001	XR_005551	LOC294903	PREDICTED: Rattus norvegicus similar to Glyceraldehyde-3-phosphate dehydrogenase (GAPDH) (LOC294903), mRNA [XR_005551]	XR_005551	FALSE
A_44_P412961	0.018484	0.000219397	-0.401984	-0.780002	-0.763565	-0.0722219	0.235664	XM_221205	XM_221205	Rattus norvegicus similar to hypothetical protein FLJ23825 (LOC303750), mRNA [XM_221205]	XM_221205	FALSE
A_42_P548410	0.0407758	0.00427555	-0.154284	-0.202802	-0.252916	1.25691	0.733444	NM_031315	Cte1	Rattus norvegicus cytosolic acyl-CoA thioesterase 1 (Cte1), mRNA [NM_031315]	NM_031315	FALSE
A_43_P21753	0.0206599	0.000457491	0.16626	0.550207	0.686738	-0.0063132	-0.124068	ENSRNOT00000008184	Sox30_predicted	PREDICTED: Rattus norvegicus SRY-box containing gene 30 (predicted) (Sox30_predicted), mRNA [XM_220328]		FALSE
A_44_P995874	0.0475632	0.0060362	-0.359816	-0.772445	-0.612364	0.0432652	0.352373	ENSRNOT00000027351	ENSRNOT00000027351	similar to 5-nucleotidase, cytosolic II (LOC365090), mRNA [Source:RefSeq_dna;Acc:XR_008313] [ENSRNOT00000027351]		FALSE
A_44_P804051	0.0368896	0.00327795	0.0398439	-0.477828	-0.570615	0.378226	0.369408	AW143981	AW143981	AW143981 EST294277 Normalized rat embryo, Bento Soares Rattus sp. cDNA clone RGICE39 5' end, mRNA sequence [AW143981]	AW143981	FALSE
A_44_P652690	0.0442971	0.00513818	0.0446851	-0.609441	-0.862356	0.267165	0.214301	TC648402	TC648402	Q8CHH7_MOUSE (Q8CHH7) MKIAA0219 protein (Fragment), partial (9%) [TC648402]		FALSE
A_44_P137981	0.0343996	0.00272184	-0.453082	-0.711295	-0.699441	-0.0634491	0.231274	XR_005922	LOC307465	PREDICTED: Rattus norvegicus similar to karyopherin (importin) alpha 2 (LOC307465), mRNA [XR_005922]	XR_005922	FALSE
A_44_P1040889	0.0221809	0.000630979	-0.598449	-0.970947	-1.16831	-0.00862503	0.0517839	XM_216893	Cpsf6_predicted	PREDICTED: Rattus norvegicus cleavage and polyadenylation specific factor 6, 68kDa (predicted) (Cpsf6_predicted), mRNA [XM_216893]	XM_216893	FALSE
A_44_P622201	0.0354339	0.00300441	-0.438061	-0.614487	-0.838803	1.22904	1.29072	BC098778	BC098778	Rattus norvegicus cDNA clone IMAGE:7374368 [BC098778]	BC098778	FALSE
A_44_P854011	0.0373283	0.00338399	-0.0722716	0.266716	0.225701	-0.143354	-0.480013	XM_573454	Ppfia4	PREDICTED: Rattus norvegicus protein tyrosine phosphatase, receptor type, f polypeptide (PTPRF), interacting protein (liprin), alpha 4 (Ppfia4), mRNA [XM_573454]	XM_573454	FALSE
A_44_P773350	0.031494	0.00208285	-0.138612	-0.212014	-0.394269	0.207021	0.151092	CO386862	CO386862	AGENCOURT_26621791 NIH_MGC_253 Rattus norvegicus cDNA clone IMAGE:7302708 5', mRNA sequence [CO386862]	CO386862	FALSE
A_44_P484485	0.0195024	0.000284078	0.136125	0.0941232	0.226685	0.563313	0.827234	NM_001011967	Fastk	Rattus norvegicus Fas-activated serine/threonine kinase (Fastk), mRNA [NM_001011967]	NM_001011967	FALSE
A_43_P17608	0.020908	0.000515911	-0.114596	-0.334947	-0.506843	0.409273	0.283058	XM_001053322	RGD1309450_predicted	PREDICTED: Rattus norvegicus similar to KIAA2010 protein (predicted) (RGD1309450_predicted), mRNA [XM_001053322]	XM_001053322	FALSE
A_44_P488475	0.0266864	0.00121946	-0.0349838	-0.718119	-1.14836	-0.212725	-0.186285	XM_001072973	LOC686590	PREDICTED: Rattus norvegicus similar to IQ motif and Sec7 domain 1, transcript variant 1 (LOC686590), mRNA [XM_001072973]	XM_001072973	FALSE
A_42_P714875	0.0182041	0.000114083	0.525556	0.0474935	-0.000537038	0.755989	1.13802	ENSRNOT00000024779	Clptm1_predicted	PREDICTED: Rattus norvegicus cleft lip and palate associated transmembrane protein 1 (predicted) (Clptm1_predicted), mRNA [XM_214859]		FALSE
A_44_P264195	0.0243829	0.000888508	-0.247118	-0.755301	-0.617309	0.138063	0.266185	AW915009	AW915009	EST346313 Normalized rat ovary, Bento Soares Rattus sp. cDNA clone RGIBN44 5' end, mRNA sequence [AW915009]	AW915009	FALSE
A_42_P600796	0.0349475	0.00285852	-0.245318	0.0167494	0.0150429	-1.02031	-0.848674	ENSRNOT00000006903	Ccdc53_predicted	PREDICTED: Rattus norvegicus coiled-coil domain containing 53 (predicted) (Ccdc53_predicted), mRNA [XM_216873]		FALSE
A_44_P493652	0.0284005	0.00150613	0.0806382	0.398298	0.869054	-0.133137	-0.206662	AI408425	AI408425	AI408425 EST236715 Normalized rat ovary, Bento Soares Rattus sp. cDNA clone ROVEP26 3' end, mRNA sequence [AI408425]	AI408425	FALSE
A_44_P656430	0.0290423	0.00166102	-0.208384	-0.27254	-0.325648	0.135261	0.455855	TC640993	TC640993			FALSE
A_44_P203195	0.0270584	0.00127111	0.249132	-0.360232	-0.929267	0.116791	0.0399024	NM_053585	Madd	Rattus norvegicus MAP-kinase activating death domain (Madd), mRNA [NM_053585]	NM_053585	FALSE
A_44_P820573	0.032581	0.00230306	0.174278	-0.347849	-0.602515	0.0255038	-0.0184354	XM_233975	RGD1311331_predicted	PREDICTED: Rattus norvegicus similar to HS1 binding protein 3 (predicted) (RGD1311331_predicted), mRNA [XM_233975]	XM_233975	FALSE
A_44_P637586	0.0173418	4.15507e-05	-0.380222	-0.514755	-0.685134	0.0215837	0.256984	BC086562	BC086562	Rattus norvegicus cDNA clone IMAGE:7307013 [BC086562]	BC086562	FALSE
A_43_P23135	0.0485886	0.0063167	-0.221946	0.178619	0.53263	-0.286138	-0.20603	ENSRNOT00000008153	Jph1_predicted	PREDICTED: Rattus norvegicus junctophilin 1 (predicted) (Jph1_predicted), mRNA [XM_232578]		FALSE
A_43_P16155	0.0218827	0.000593492	-0.254248	-0.930131	-0.822974	0.0465608	0.315667	ENSRNOT00000014604	Braf	V-raf murine sarcoma viral oncogene B1-like protein (Fragment). [Source:Uniprot/SPTREMBL;Acc:Q99MC6] [ENSRNOT00000014604]		FALSE
A_44_P714581	0.0207852	0.000479565	0.226836	-0.12638	-0.041338	0.719823	0.855662	ENSRNOT00000021976	Strn4_predicted	PREDICTED: Rattus norvegicus striatin, calmodulin binding protein 4 (predicted) (Strn4_predicted), mRNA [XM_218432]		FALSE
A_44_P131325	0.0449579	0.00528908	0.0840378	0.110166	-0.15429	-0.0686941	-0.396143	ENSRNOT00000027087	RGD1566314_predicted	PREDICTED: Rattus norvegicus similar to KIAA1407 (predicted) (RGD1566314_predicted), mRNA [XM_221452]		FALSE
A_44_P1048388	0.0274974	0.00135352	-0.0451168	-0.201465	-0.326953	-0.0278624	0.188506	NM_001037193	LOC307798	Rattus norvegicus similar to 24432 protein (LOC307798), mRNA [NM_001037193]	NM_001037193	FALSE
A_44_P635089	0.0434778	0.00490582	-0.0285693	-0.134475	-0.996968	0.125278	-0.52824	AI030078	AI030078	UI-R-C0-jr-f-05-0-UI.s1 UI-R-C0 Rattus norvegicus cDNA clone UI-R-C0-jr-f-05-0-UI 3', mRNA sequence [AI030078]	AI030078	FALSE
A_44_P151744	0.0182041	9.94456e-05	0.676066	0.128536	0.347954	1.33014	1.71439	ENSRNOT00000034264	Hip1r	Huntingtin interacting protein 1 related (Fragment). [Source:Uniprot/SPTREMBL;Acc:Q99PW9] [ENSRNOT00000034264]		FALSE
A_44_P804200	0.0394229	0.00396015	-0.126804	-0.268248	-0.481804	0.153696	0.0825797	XM_001067113	Atg16l1_predicted	PREDICTED: Rattus norvegicus ATG16 autophagy related 16-like 1 (S. cerevisiae) (predicted), transcript variant 2 (Atg16l1_predicted), mRNA [XM_001067113]	XM_001067113	FALSE
A_44_P1055052	0.0300953	0.00184733	-0.144952	-0.334503	-0.391522	0.630062	0.647154	ENSRNOT00000024938	ENSRNOT00000024938	similar to nucleolar protein 1 (LOC367748), mRNA [Source:RefSeq_dna;Acc:XR_005684] [ENSRNOT00000024938]		FALSE
A_44_P1046074	0.029831	0.00177903	-0.208776	-1.00088	-1.30771	-0.503043	-0.176108	BF551311	BF551311	BF551311 UI-R-C0-il-b-08-0-UI.r1 UI-R-C0 Rattus norvegicus cDNA clone UI-R-C0-il-b-08-0-UI 5', mRNA sequence [BF551311]	BF551311	FALSE
A_44_P899467	0.018484	0.000170178	-0.411369	-0.589877	-0.761103	0.0817181	-0.0411059	ENSRNOT00000022886	RGD1307158_predicted	UI-R-BS1-azr-f-06-0-UI.s1 UI-R-BS1 Rattus norvegicus cDNA clone UI-R-BS1-azr-f-06-0-UI 3', mRNA sequence [BE118692]		FALSE
A_44_P437450	0.0464662	0.00567952	-0.255193	-0.0890121	-0.270201	-1.24417	-1.26985	BQ196433	BQ196433	BQ196433 UI-R-EA0-ckw-k-01-0-UI.s1 UI-R-EA0 Rattus norvegicus cDNA clone UI-R-EA0-ckw-k-01-0-UI 3', mRNA sequence [BQ196433]	BQ196433	FALSE
A_44_P553408	0.0452502	0.00538256	0.285028	0.629463	0.633347	-0.140549	-0.205213	XM_236616	Dock3_predicted	Rattus norvegicus similar to modifier of cell adhesion (LOC315992), mRNA [XM_236616]	XM_236616	FALSE
A_44_P395975	0.0292955	0.00169673	-0.0782562	-0.22879	-0.4425	-0.704697	-0.6331	ENSRNOT00000022069	Ndnl2	Ndnl2 protein (Fragment). [Source:Uniprot/SPTREMBL;Acc:Q4KM72] [ENSRNOT00000022069]		FALSE
A_44_P111337	0.0323972	0.00226986	-0.309506	-0.830243	-0.983316	0.236622	0.257279	AW915033	AW915033	AW915033 EST346337 Normalized rat ovary, Bento Soares Rattus sp. cDNA clone RGIBN69 5' end, mRNA sequence [AW915033]	AW915033	FALSE
A_44_P332618	0.0458302	0.00551514	0.373098	-0.212358	-0.13777	0.855209	0.853316	NM_031675	Actn4	Rattus norvegicus actinin alpha 4 (Actn4), mRNA [NM_031675]	NM_031675	FALSE
A_43_P17481	0.0207958	0.000482234	0.157721	-0.0957933	-0.464313	0.12121	0.00218022	ENSRNOT00000056392	Rtf1_predicted	Rattus norvegicus similar to KIAA0252 protein (LOC366169), mRNA [XM_345421]		FALSE
A_44_P184753	0.0378983	0.00358265	0.33115	0.372324	-0.0556335	0.387175	0.11526	NM_001008829	RT1-A2	Rattus norvegicus RT1 class Ia, locus A2 (RT1-A2), mRNA [NM_001008829]	NM_001008829	FALSE
A_44_P284859	0.0275319	0.00136674	-0.16077	-0.511071	-0.862847	-0.113672	-0.0301691	ENSRNOT00000038432	Htatsf1_predicted	PREDICTED: Rattus norvegicus HIV TAT specific factor 1 (predicted) (Htatsf1_predicted), mRNA [XM_229199]		FALSE
A_44_P342756	0.0285217	0.00153402	0.435285	-0.0518541	0.122268	1.03229	1.43774	ENSRNOT00000060784	RGD1566272_predicted	PREDICTED: Rattus norvegicus similar to glyceraldehyde-3-phosphate dehydrogenase (phosphorylating) (EC 1.2.1.12) (predicted) (RGD1566272_predicted), mRNA [XM_346024]		FALSE
A_44_P487157	0.0182041	9.01013e-05	-0.357626	-0.489371	-0.372165	0.501114	0.394527	ENSRNOT00000025104	ENSRNOT00000025104	Ras-related protein Rab-6A (Rab-6) (Fragment). [Source:Uniprot/SWISSPROT;Acc:Q9WVB1] [ENSRNOT00000025104]		FALSE
A_44_P311955	0.0294903	0.0017283	0.433485	0.387616	0.343431	-0.0780193	-0.0825444	NM_017171	Prkce	Rattus norvegicus protein kinase C, epsilon (Prkce), mRNA [NM_017171]	NM_017171	FALSE
A_44_P464196	0.0435595	0.00498604	0.913289	0.285393	-0.368388	1.06535	0.725099	NM_001012164	Cd97	Rattus norvegicus CD97 antigen (Cd97), mRNA [NM_001012164]	NM_001012164	FALSE
A_44_P212934	0.0276957	0.0014038	1.06278	0.44719	0.0191582	0.53647	0.930084	NM_001033706	LOC361571	Rattus norvegicus similar to RIKEN cDNA 2410004H02 (LOC361571), mRNA [NM_001033706]	NM_001033706	FALSE
A_44_P1009594	0.0173418	4.0967e-05	-0.78213	-0.124277	0.0870471	0.877511	1.74578	NM_001024232	Cyp3a62	Rattus norvegicus cytochrome P450, subfamily 3A, polypeptide 62 (Cyp3a62), mRNA [NM_001024232]	NM_001024232	FALSE
A_44_P132815	0.0295886	0.00174992	0.00623858	-0.167527	0.0441676	0.453436	0.552295	ENSRNOT00000018867	ENSRNOT00000018867	Muscleblind-like protein BLES04 (Fragment). [Source:Uniprot/SPTREMBL;Acc:Q8CIQ0] [ENSRNOT00000018867]		FALSE
A_44_P1044441	0.0216955	0.000570758	-0.0132219	-0.150645	-0.570592	-0.467084	-0.211652	ENSRNOT00000056053	ENSRNOT00000056053	PHTF1 protein (Fragment). [Source:Uniprot/SPTREMBL;Acc:Q8R2E8] [ENSRNOT00000056053]		FALSE
A_44_P412503	0.0477811	0.00609578	0.910465	0.12582	0.165786	1.22634	1.73889	ENSRNOT00000036910	Nisch	Nisch protein (Fragment). [Source:Uniprot/SPTREMBL;Acc:Q4G017] [ENSRNOT00000036910]		FALSE
A_44_P230960	0.0389024	0.0038169	-0.0939001	-0.537234	-0.92781	0.152147	0.19183	AW144271	AW144271	AW144271 EST294567 Normalized rat ovary, Bento Soares Rattus sp. cDNA clone RGICO89 5' end, mRNA sequence [AW144271]	AW144271	FALSE
A_43_P22634	0.0430867	0.00481936	-0.475033	-0.357619	-0.190972	-0.00273669	0.387283	DQ490055	DQ490055	Rattus norvegicus Arg3.1/Arc mRNA-binding zinc finger protein (Zinki) mRNA, complete cds. [DQ490055]	DQ490055	FALSE
A_44_P1052976	0.027636	0.00138627	-0.0486704	-0.285514	-0.387367	0.0339481	0.299004	ENSRNOT00000011070	RGD1563990_predicted	Rattus norvegicus similar to 8430411H09Rik protein (LOC300146), mRNA [XM_217014]		FALSE
A_42_P837441	0.026655	0.00121543	-0.0782419	-0.556925	-1.01008	0.00122178	-0.357487	TC583295	TC583295			FALSE
A_44_P272324	0.0354164	0.00297648	0.21567	-0.0233374	-0.366747	0.2093	0.447727	XM_343162	Mbd3_predicted	PREDICTED: Rattus norvegicus methyl-CpG binding domain protein 3 (predicted) (Mbd3_predicted), mRNA [XM_343162]	XM_343162	FALSE
A_44_P987257	0.0423094	0.00462112	0.0881703	0.475278	0.3066	-0.536803	-0.400627	AI555307	AI555307	UI-R-C2p-qq-f-05-0-UI.s1 UI-R-C2p Rattus norvegicus cDNA clone UI-R-C2p-qq-f-05-0-UI 3', mRNA sequence [AI555307]	AI555307	FALSE
A_44_P316136	0.0419149	0.00451269	0.74875	0.168171	0.189077	1.20909	1.17762	U18650	Hdh	Rattus norvegicus Huntington gene product mRNA, complete cds. [U18650]	U18650	FALSE
A_44_P122141	0.0323805	0.00225163	0.544884	0.103465	-0.235863	0.288717	0.427603	ENSRNOT00000002569	Klhl22_predicted	Rattus norvegicus similar to hypothetical protein FLJ14360 (LOC303792), mRNA [XM_221268]		FALSE
A_43_P15163	0.0210499	0.000530653	-0.224139	-0.361465	-0.675845	-0.819926	-0.814455	XM_233108	Stag2_predicted	PREDICTED: Rattus norvegicus stromal antigen 2 (predicted) (Stag2_predicted), mRNA [XM_233108]	XM_233108	FALSE
A_44_P166495	0.020081	0.000338778	0.102536	-0.625384	-0.609054	0.489819	0.435051	NM_001012199	Rangap1	Rattus norvegicus RAN GTPase activating protein 1 (Rangap1), mRNA [NM_001012199]	NM_001012199	FALSE
A_44_P863304	0.0323398	0.00224149	0.152712	-0.478076	-0.593143	-1.25708	-0.985789	AW529994	AW529994	AW529994 UI-R-C4-alc-g-09-0-UI.s1 UI-R-C4 Rattus norvegicus cDNA clone UI-R-C4-alc-g-09-0-UI 3', mRNA sequence [AW529994]	AW529994	FALSE
A_44_P546217	0.0256092	0.00105777	0.0808511	-0.16356	-0.676893	0.641803	0.757172	ENSRNOT00000020021	RGD1559904_predicted	Rattus norvegicus similar to mKIAA1429 protein (LOC313062), mRNA [XM_232784]		FALSE
A_44_P268018	0.0247452	0.00092823	0.262373	-0.0842718	0.121527	-0.908323	-1.25539	BF543500	BF543500	BF543500 UI-R-C3-sz-h-08-0-UI.r1 UI-R-C3 Rattus norvegicus cDNA clone UI-R-C3-sz-h-08-0-UI 5', mRNA sequence [BF543500]	BF543500	FALSE
A_42_P643272	0.0353328	0.0029606	-0.349063	-0.0800283	-0.154336	-0.66851	-0.603069	NM_053389	Sip1	Rattus norvegicus survival of motor neuron protein interacting protein 1 (Sip1), mRNA [NM_053389]	NM_053389	FALSE
A_44_P361301	0.0493829	0.00648626	0.428252	-0.4936	-0.550121	1.17785	0.990925	ENSRNOT00000022400	ENSRNOT00000022400	Tln1 protein. [Source:Uniprot/SPTREMBL;Acc:Q498D4] [ENSRNOT00000022400]		FALSE
A_44_P186165	0.0497411	0.00659115	0.0796469	0.254795	0.149543	-0.560859	-0.437333	XM_578804	RGD1562478_predicted	PREDICTED: Rattus norvegicus similar to RAB17, member RAS oncogene family (predicted) (RGD1562478_predicted), mRNA [XM_578804]	XM_578804	FALSE
A_44_P621925	0.0182041	0.000130864	-0.243537	-0.73885	-1.1669	0.0170583	-0.0680472	TC591972	TC591972	Q7TQ12_RAT (Q7TQ12) Aa1114, partial (10%) [TC612420]		FALSE
A_44_P252634	0.0483419	0.00623099	0.0403713	-0.0106857	-0.138099	0.136236	0.385598	NM_001007801	Yipf3	Rattus norvegicus Yip1 domain family, member 3 (Yipf3), mRNA [NM_001007801]	NM_001007801	FALSE
A_44_P507571	0.0396186	0.00402992	-1.13732	-1.21054	-0.663535	1.00768	0.706054	ENSRNOT00000020014	Ccne1	G1/S-specific cyclin-E1. [Source:Uniprot/SWISSPROT;Acc:P39949] [ENSRNOT00000020014]		FALSE
A_44_P812382	0.0450333	0.00530695	0.169595	-0.510946	-1.16649	0.0931572	0.12882	ENSRNOT00000010685	LOC679252	similar to Myeloid/lymphoid or mixed-lineage leukemia protein 3 homolog (Histone-lysine N-methyltransferase, H3 lysine-4 specific MLL3) (LOC502710), mRNA [Source:RefSeq_dna;Acc:XR_006158] [ENSRNOT00000010685]		FALSE
A_44_P331832	0.0311537	0.00202309	-0.782427	-0.382634	-0.108018	-0.946625	-0.975802	AI176595	AI176595	AI176595 EST220183 Normalized rat ovary, Bento Soares Rattus sp. cDNA clone ROVBU30 3' end, mRNA sequence [AI176595]	AI176595	FALSE
A_44_P356014	0.0240033	0.000840763	-0.131003	-0.360308	-0.368992	0.386867	0.39801	NM_001004262	Cog6	Rattus norvegicus component of oligomeric golgi complex 6 (Cog6), mRNA [NM_001004262]	NM_001004262	FALSE
A_44_P149380	0.0393771	0.0039498	0.446344	0.881708	1.75373	0.0978607	0.141178	NM_031582	Aoc3	Rattus norvegicus amine oxidase, copper containing 3 (Aoc3), mRNA [NM_031582]	NM_031582	FALSE
A_44_P400507	0.018484	0.000192696	-0.135955	-0.300461	-0.124206	0.836392	0.776816	NM_022535	Calu	Rattus norvegicus calumenin (Calu), mRNA [NM_022535]	NM_022535	FALSE
A_44_P497692	0.0221777	0.000628632	-0.0685782	-0.33693	-0.4376	0.825953	0.693857	ENSRNOT00000056215	ENSRNOT00000056215	similar to SH3-domain binding protein 3 (LOC688018), mRNA [Source:RefSeq_dna;Acc:XR_009418] [ENSRNOT00000056215]		FALSE
A_44_P149182	0.0263791	0.00116022	-0.31285	-0.37794	-0.451482	0.0527681	0.349168	NM_024139	Chp	Rattus norvegicus calcium binding protein p22 (Chp), mRNA [NM_024139]	NM_024139	FALSE
A_44_P622091	0.0324735	0.00228294	-0.00709105	-0.289172	-0.60308	-0.202981	-0.142093	TC638207	TC638207	Q2JR37_SYNJA (Q2JR37) Thymidylate kinase , partial (12%) [TC638207]		FALSE
A_44_P286107	0.0391508	0.00387279	0.0239815	0.0965853	-0.124693	-0.730271	-0.411611	ENSRNOT00000024473	Hbxip_predicted	PREDICTED: Rattus norvegicus hepatitis B virus x interacting protein (predicted) (Hbxip_predicted), mRNA [XM_215674]		FALSE
A_44_P490212	0.029831	0.00177873	0.00039947	0.238061	0.931966	0.025425	-0.00245726	XM_217064	XM_217064	Rattus norvegicus Retinoic acid receptor, gamma (Rarg), mRNA [XM_217064]	XM_217064	FALSE
A_44_P776983	0.0460457	0.00558561	0.167789	-0.481389	-0.81673	0.564719	0.265573	TC633522	TC633522	Q2UCX4_ASPOR (Q2UCX4) RIB40 genomic DNA, SC012, partial (4%) [TC633522]		FALSE
A_42_P623013	0.0224794	0.000697588	-0.0231437	-0.214632	-0.285367	0.282066	0.323324	XM_237812	Recql5_predicted	PREDICTED: Rattus norvegicus RecQ protein-like 5 (predicted) (Recql5_predicted), mRNA [XM_237812]	XM_237812	FALSE
A_44_P956272	0.0276957	0.00140455	-0.184679	-0.745239	-1.00491	-0.332599	-0.0641831	NM_017107	Ogt	Rattus norvegicus O-linked N-acetylglucosamine (GlcNAc) transferase (UDP-N-acetylglucosamine:polypeptide-N-acetylglucosaminyl transferase) (Ogt), mRNA [NM_017107]	NM_017107	FALSE
A_44_P552764	0.0354339	0.00300787	0.645342	0.160697	-0.012288	0.864958	0.902426	NM_031357	Tpp1	Rattus norvegicus tripeptidyl peptidase I (Tpp1), mRNA [NM_031357]	NM_031357	FALSE
A_44_P135829	0.0336677	0.00250125	-0.37711	-0.734282	-0.893251	-0.00208676	-0.0134288	XM_001069368	Srrm1_predicted	PREDICTED: Rattus norvegicus serine/arginine repetitive matrix 1 (predicted) (Srrm1_predicted), mRNA [XM_001069368]	XM_001069368	FALSE
A_44_P373178	0.0344491	0.00272881	-0.175952	-0.125965	-0.120629	0.617912	0.615097	ENSRNOT00000055688	Pphln1_predicted	PREDICTED: Rattus norvegicus periphilin 1 (predicted) (Pphln1_predicted), mRNA [XM_345865]		FALSE
A_44_P1030766	0.0456591	0.00547411	-0.230253	-0.62445	-0.821567	-0.730021	-0.947624	XM_341883	Pcf11_predicted	PREDICTED: Rattus norvegicus cleavage and polyadenylation factor subunit homolog (S. cerevisiae) (predicted) (Pcf11_predicted), mRNA [XM_341883]	XM_341883	FALSE
A_44_P1044499	0.0388846	0.00380757	0.0514899	-0.416167	-1.01744	-0.12284	-0.205052	ENSRNOT00000006333	ENSRNOT00000006333	ESF1 homolog (ABT1-associated protein). [Source:Uniprot/SWISSPROT;Acc:Q76MT4] [ENSRNOT00000006333]		FALSE
A_44_P220575	0.0218785	0.000583899	-0.205205	-0.463192	-0.828829	0.244162	0.0510044	ENSRNOT00000007932	Irak4_predicted	PREDICTED: Rattus norvegicus interleukin-1 receptor-associated kinase 4 (predicted) (Irak4_predicted), mRNA [XM_217026]		FALSE
A_44_P173478	0.0372136	0.00335861	-0.158828	-0.292372	-0.669082	0.149639	0.177056	XM_343002	Cebpz_predicted	Rattus norvegicus similar to putative CCAAT binding factor 1; alternatively spliced transcript mCBF1 (LOC362686), mRNA [XM_343002]	XM_343002	FALSE
A_44_P436442	0.0351502	0.00289736	-0.44186	-0.758781	-0.616475	0.395586	0.305689	XM_216766	Cpsf2_predicted	PREDICTED: Rattus norvegicus cleavage and polyadenylation specific factor 2 (predicted) (Cpsf2_predicted), mRNA [XM_216766]	XM_216766	FALSE
A_42_P574960	0.04155	0.00445219	0.0915453	-0.712649	-0.76247	0.548792	0.416357	ENSRNOT00000004064	ENSRNOT00000004064	HECT, UBA and WWE domain-containing protein 1 (EC 6.3.2.-) (E3 ubiquitin protein ligase URE-B1) (Upstream regulatory element-binding protein 1) (Fragment). [Source:Uniprot/SWISSPROT;Acc:P51593] [ENSRNOT00000004064]		FALSE
A_44_P398864	0.0222025	0.000657994	-0.110327	-0.524205	-0.828337	0.197667	0.237881	ENSRNOT00000003804	Cog1_predicted	PREDICTED: Rattus norvegicus component of oligomeric golgi complex 1 (predicted) (Cog1_predicted), mRNA [XM_239373]		FALSE
A_42_P836598	0.0423929	0.00463614	0.232355	-0.0800855	-0.723343	-0.0902623	-0.24978	ENSRNOT00000003026	Klhl8_predicted	Rattus norvegicus similar to Kelch-like protein 8 (LOC289457), mRNA [XM_213995]		FALSE
A_43_P11901	0.0380536	0.00361312	0.297811	0.00423324	0.174718	-0.580886	-0.38212	NM_017297	Kcnj5	Rattus norvegicus potassium inwardly-rectifying channel, subfamily J, member 5 (Kcnj5), mRNA [NM_017297]	NM_017297	FALSE
A_44_P143472	0.0368896	0.00327506	0.162009	-0.320435	-0.329012	0.821122	0.855698	ENSRNOT00000025889	RGD1562596_predicted	PREDICTED: Rattus norvegicus similar to mKIAA0159 protein (predicted) (RGD1562596_predicted), mRNA [XM_575668]		FALSE
A_43_P11729	0.0284809	0.00151374	-0.69987	-1.46208	-1.56747	-0.166068	0.444227	NM_013134	Hmgcr	Rattus norvegicus 3-hydroxy-3-methylglutaryl-Coenzyme A reductase (Hmgcr), mRNA [NM_013134]	NM_013134	FALSE
A_44_P342730	0.0253431	0.000989871	-0.0234931	-0.280307	-0.444582	0.469612	0.458352	NM_001012275	Arih2_predicted	Rattus norvegicus ariadne homolog 2 (Drosophila) (predicted) (Arih2_predicted), mRNA [NM_001012275]	NM_001012275	FALSE
A_44_P383596	0.0491841	0.00645022	-0.337684	-0.927838	-1.37884	-0.468504	-0.624651	AW915928	AW915928	AW915928 EST347232 Rat gene index, normalized rat, norvegicus, Bento Soares Rattus norvegicus cDNA clone RGIDC74 5' end, mRNA sequence [AW915928]	AW915928	FALSE
A_44_P838657	0.0485886	0.00631893	-0.643386	-1.07049	-1.11858	-0.0977879	-0.290739	TC596957	TC596957	Q4ENY4_LISMO (Q4ENY4) Cobalt ABC transporter, ATP-binding protein, partial (5%) [TC596957]		FALSE
A_44_P748640	0.0351502	0.00289541	-0.0322624	-0.41352	-0.685594	0.229303	0.207801	XM_001075629	RGD1565449_predicted	PREDICTED: Rattus norvegicus similar to Parn protein (predicted) (RGD1565449_predicted), mRNA [XM_001075629]	XM_001075629	FALSE
A_44_P538691	0.0243559	0.00087743	-0.0560698	-0.639866	-0.878461	0.49732	0.39457	NM_031772	Rpo1-4	Rattus norvegicus RNA polymerase 1-4 (Rpo1-4), mRNA [NM_031772]	NM_031772	FALSE
A_44_P141213	0.0323252	0.0022197	0.54962	0.070208	-0.0216349	-0.0953755	-0.280085	AI412098	AI412098	AI412098 EST240392 Normalized rat kidney, Bento Soares Rattus sp. cDNA clone RKIEJ68 3' end, mRNA sequence [AI412098]	AI412098	FALSE
A_44_P530813	0.0203907	0.000410868	-0.170012	-0.261312	-0.234358	0.605508	0.749377	NM_012922	Casp3	Rattus norvegicus caspase 3, apoptosis related cysteine protease (Casp3), mRNA [NM_012922]	NM_012922	FALSE
A_44_P989647	0.0286631	0.00157512	0.360813	0.0390312	-0.0873278	1.0105	1.02609	A_44_P989647	A_44_P989647			FALSE
A_44_P226029	0.0483419	0.00623738	-0.140904	-0.312723	-0.758427	-0.298177	-0.415016	ENSRNOT00000016184	ENSRNOT00000016184	Heterogeneous nuclear ribonucleoprotein G (hnRNP G) (RNA-binding motif protein, X chromosome). [Source:Uniprot/SWISSPROT;Acc:P84586] [ENSRNOT00000016184]		FALSE
A_44_P450173	0.0187873	0.000252585	-0.0811585	-0.350935	-0.586639	0.373893	0.583155	XM_227543	Man1a2_predicted	PREDICTED: Rattus norvegicus mannosidase, alpha, class 1A, member 2 (predicted) (Man1a2_predicted), mRNA [XM_227543]	XM_227543	FALSE
A_42_P460737	0.0474627	0.00598863	-0.443836	-0.649553	-0.946544	0.170312	0.133984	ENSRNOT00000018667	RGD1559968_predicted	Q3TTA1_MOUSE (Q3TTA1) Adult male testis cDNA, RIKEN full-length enriched library, clone:4933412E13 product:ADP-ribosylation factor guanine nucleotide factor 6 (Hepatocellular carcinoma-associated antigen 67) homolog, partial (16%) [TC609781]		FALSE
A_44_P473366	0.0187873	0.000252862	-0.219654	-0.675675	-0.730631	0.0144643	0.106696	ENSRNOT00000016022	Usp33	phosphatidylinositol glycan anchor biosynthesis, class K [Source:RefSeq_peptide;Acc:NP_001011953] [ENSRNOT00000016022]		FALSE
A_44_P391294	0.0270761	0.00128256	0.356864	-0.0495841	-0.302226	0.710077	0.890486	NM_031586	Ighmbp2	Rattus norvegicus immunoglobulin mu binding protein 2 (Ighmbp2), mRNA [NM_031586]	NM_031586	FALSE
A_44_P392370	0.0346132	0.00279588	-0.26381	-0.38238	-0.841519	-0.531317	-0.544609	XM_236948	Tbn_predicted	PREDICTED: Rattus norvegicus taube nuss homolog (mouse) (predicted) (Tbn_predicted), mRNA [XM_236948]	XM_236948	FALSE
A_44_P851664	0.0452127	0.0053501	-0.457116	-0.75465	-1.07554	-0.152579	-0.253464	AA801123	AA801123	AA801123 EST190620 Normalized rat ovary, Bento Soares Rattus sp. cDNA clone ROVAA70 5' end, mRNA sequence [AA801123]	AA801123	FALSE
A_44_P807849	0.0255445	0.00100177	-0.220608	-0.0659931	-0.270744	-0.701093	-0.769544	NM_001005765	Rap1a	Rattus norvegicus RAS-related protein 1a (Rap1a), mRNA [NM_001005765]	NM_001005765	FALSE
A_44_P635138	0.0354309	0.00298449	0.0124589	-0.0557365	-0.646199	-0.618729	-0.874008	XM_001072782	Mrc1_predicted	PREDICTED: Rattus norvegicus mannose receptor, C type 1 (predicted) (Mrc1_predicted), mRNA [XM_001072782]	XM_001072782	FALSE
A_42_P491376	0.0182041	0.000145167	-0.287238	-0.541815	-0.894528	-0.2301	-0.223251	XM_341116	RGD1566016_predicted	Rattus norvegicus similar to KIAA0456 protein (LOC360840), mRNA [XM_341116]	XM_341116	FALSE
A_44_P669034	0.0204026	0.000425407	-0.223882	-0.411811	-0.60113	0.161079	0.527527	NM_001080207	RGD1566329_predicted	Rattus norvegicus similar to zinc finger protein 652 (predicted) (RGD1566329_predicted), mRNA [NM_001080207]	NM_001080207	FALSE
A_42_P577431	0.0484148	0.00627451	-0.346948	-0.796876	-1.40261	-0.196444	-0.458937	XM_001057993	LOC680611	PREDICTED: Rattus norvegicus similar to B-cell leukemia [XM_001057993]	XM_001057993	FALSE
A_44_P178503	0.0318839	0.00214506	-0.311983	-0.829386	-1.28655	-0.720623	-0.649281	ENSRNOT00000002702	ENSRNOT00000002702	PREDICTED: Rattus norvegicus similar to KIAA1407 (predicted) (RGD1566314_predicted), mRNA [XM_221452]		FALSE
A_44_P681613	0.0197154	0.000320705	-0.880888	-1.68791	-0.828506	0.867188	1.09241	BF287586	BF287586	BF287586 EST452177 Rat Gene Index, normalized rat, Rattus norvegicus cDNA Rattus norvegicus cDNA clone RGIGH95 5' sequence, mRNA sequence [BF287586]	BF287586	FALSE
A_42_P808456	0.0252748	0.000980023	-0.175626	-0.502834	-0.880221	0.56179	0.517229	ENSRNOT00000004834	Disp1_predicted	PREDICTED: Rattus norvegicus dispatched homolog 1 (Drosophila) (predicted) (Disp1_predicted), mRNA [XM_213964]		FALSE
A_44_P434564	0.0221809	0.000633216	-0.416269	-0.102028	0.059653	-0.667989	-0.74645	BF396498	BF396498	BF396498 UI-R-BS2-bdy-h-01-0-UI.s1 UI-R-BS2 Rattus norvegicus cDNA clone UI-R-BS2-bdy-h-01-0-UI 3', mRNA sequence [BF396498]	BF396498	FALSE
A_44_P713885	0.0197154	0.000320204	-0.112606	-0.0848109	-0.155417	0.215605	0.634608	A_44_P713885	A_44_P713885			FALSE
A_44_P412200	0.0406624	0.0042471	-0.0603734	-0.211418	0.0846323	0.685581	1.17023	NP516857	NP516857	GB|AB033701.1|BAA85862.1 cytochrome b [Rattus argentiventer] [NP516857]		FALSE
A_44_P288108	0.0203907	0.000404694	-0.0824231	-0.532276	-0.701956	0.359209	0.324335	ENSRNOT00000001049	Abcf1	ATP-binding cassette sub-family F member 1 (ATP-binding cassette 50). [Source:Uniprot/SWISSPROT;Acc:Q6MG08] [ENSRNOT00000001049]		FALSE
A_43_P16811	0.0474627	0.00597995	-0.0650561	-0.613712	-0.421303	0.247291	0.354547	NM_001014073	RGD1305486	Rattus norvegicus similar to RIKEN cDNA 2810405J04 (RGD1305486), mRNA [NM_001014073]	NM_001014073	FALSE
A_44_P381420	0.0263791	0.00117609	-0.376872	-0.286889	-0.258794	-1.46758	-1.36156	AI169092	AI169092	AI169092 EST214923 Normalized rat kidney, Bento Soares Rattus sp. cDNA clone RKIBM96 3' end, mRNA sequence [AI169092]	AI169092	FALSE
A_44_P192010	0.0295202	0.0017428	-0.214355	-0.419323	-0.942311	0.228597	0.190733	ENSRNOT00000015789	Tubgcp5_predicted	PREDICTED: Rattus norvegicus tubulin, gamma complex associated protein 5 (predicted) (Tubgcp5_predicted), mRNA [XM_218711]		FALSE
A_44_P775982	0.0257926	0.00107935	0.707562	0.764449	0.559212	-0.545009	-0.64332	ENSRNOT00000050006	ENSRNOT00000050006	Rattus norvegicus cDNA clone MGC:156700 IMAGE:7099560, complete cds [BC128749]		FALSE
A_44_P285001	0.0290421	0.00165676	-0.761246	-0.522514	-0.228686	-1.00605	-1.38587	AI030751	AI030751	AI030751 UI-R-C0-jd-g-01-0-UI.s1 UI-R-C0 Rattus norvegicus cDNA clone UI-R-C0-jd-g-01-0-UI 3', mRNA sequence [AI030751]	AI030751	FALSE
A_44_P210178	0.0190847	0.000265363	-0.137108	-0.121052	-0.445909	-1.31408	-1.12968	NM_152790	Carhsp1	Rattus norvegicus calcium regulated heat stable protein 1 (Carhsp1), mRNA [NM_152790]	NM_152790	FALSE
A_44_P562744	0.047391	0.00595591	0.547691	-0.0277827	-0.720052	0.206364	0.651904	TC630299	TC630299			FALSE
A_44_P1021630	0.0203907	0.000401247	0.136515	-0.096869	-0.48611	-0.859069	-1.19743	ENSRNOT00000058312	Akr1cl1_predicted	Shultzomica04346 Rat lung airway and parenchyma cDNA libraries Rattus norvegicus cDNA clone Contig3856 5', mRNA sequence [CF111095]		FALSE
A_44_P748551	0.0387142	0.00376527	0.00307536	-0.29661	0.108656	1.0602	1.14576	CO403424	CO403424	AGENCOURT_26728692 NIH_MGC_255 Rattus norvegicus cDNA clone IMAGE:7317208 5', mRNA sequence [CO403424]	CO403424	FALSE
A_43_P10735	0.019622	0.000289084	0.0349829	-0.245199	-0.292673	0.310475	0.417393	ENSRNOT00000001490	RGD1566317_predicted	UI-R-E0-co-b-04-0-UI.r1 UI-R-E0 Rattus norvegicus cDNA clone UI-R-E0-co-b-04-0-UI 5', mRNA sequence [BF555100]		FALSE
A_44_P637195	0.0267415	0.00122616	-0.196488	-0.0238476	-0.734306	-1.56196	-0.999128	TC603750	TC603750	Q7TPJ2_RAT (Q7TPJ2) Ac2-224, partial (18%) [TC603750]		FALSE
A_44_P927847	0.0115275	9.72255e-06	-0.0738548	-0.199784	-0.301539	0.300921	0.643304	AW920761	AW920761	AW920761 EST352065 Rat gene index, normalized rat, norvegicus, Bento Soares Rattus norvegicus cDNA clone RGIHB93 5' end, mRNA sequence [AW920761]	AW920761	FALSE
A_43_P20972	0.0392384	0.00390175	0.759609	0.151813	-0.0778607	0.641373	0.746282	ENSRNOT00000002897	RGD1563429_predicted	PREDICTED: Rattus norvegicus similar to T-cell activation leucine repeat-rich protein (predicted) (RGD1563429_predicted), mRNA [XM_001064039]		FALSE
A_42_P673212	0.025968	0.00109695	-0.0791901	-0.683628	-0.799436	0.648102	0.491948	ENSRNOT00000039709	Cad	PREDICTED: Rattus norvegicus carbamyl phosphatate synthetase 2 (mapped) (Cad_mapped), mRNA [XM_343027]		FALSE
A_44_P290582	0.0338452	0.00258268	-0.291689	-0.520135	-0.620632	0.158353	0.283654	NM_001014129	Noc4l	Rattus norvegicus nucleolar complex associated 4 homolog (S. cerevisiae) (Noc4l), mRNA [NM_001014129]	NM_001014129	FALSE
A_44_P457625	0.0169258	3.11637e-05	-0.166283	-0.460651	-0.572641	0.514081	0.616953	CA513011	Cd2ap	CA513011 UI-R-FJ0-cqb-k-20-0-UI.r1 UI-R-FJ0 Rattus norvegicus cDNA clone UI-R-FJ0-cqb-k-20-0-UI 5', mRNA sequence [CA513011]	CA513011	FALSE
A_44_P643268	0.0459924	0.0055625	0.216882	-0.226174	-0.501729	0.669645	0.536571	AY623035	LOC300173	Rattus norvegicus clone S33-C glycosyltransferase family 8-related mRNA, 3' UTR [AY623035]	AY623035	FALSE
A_44_P1014420	0.0203907	0.000385392	0.0378016	-0.250239	-0.361159	0.478166	0.484621	ENSRNOT00000011589	RICS_predicted	PREDICTED: Rattus norvegicus RhoGAP involved in beta-catenin-N-cadherin and NMDA receptor signaling (predicted) (RICS_predicted), mRNA [XM_236020]		FALSE
A_44_P513747	0.0187873	0.000247877	-0.0510433	-0.652577	-1.06388	0.289343	0.2724	ENSRNOT00000029764	Eea1_predicted	PREDICTED: Rattus norvegicus early endosome antigen 1 (predicted) (Eea1_predicted), mRNA [XM_235064]		FALSE
A_44_P363484	0.0323805	0.00225419	0.985127	0.287003	0.146566	1.15483	1.38141	ENSRNOT00000015247	Atp13a1_predicted	PREDICTED: Rattus norvegicus ATPase type 13A1 (predicted) (Atp13a1_predicted), mRNA [XM_214310]		FALSE
A_44_P147317	0.0436015	0.00499802	0.2421	-0.32997	-0.576321	0.795092	0.568856	NM_080583	Ap2b1	Rattus norvegicus adaptor-related protein complex 2, beta 1 subunit (Ap2b1), mRNA [NM_080583]	NM_080583	FALSE
A_42_P734384	0.0189201	0.000257042	-0.186554	-0.473206	-0.76284	0.11209	0.112117	ENSRNOT00000014546	Sptlc1_predicted	PREDICTED: Rattus norvegicus serine palmitoyltransferase, long chain base subunit 1 (predicted) (Sptlc1_predicted), mRNA [XM_341495]		FALSE
A_44_P426780	0.0421656	0.00458643	-0.0925223	-0.492931	-0.627	0.441369	0.658971	ENSRNOT00000035084	Usp38_predicted	Rattus norvegicus similar to 4833420O05Rik protein (LOC307764), mRNA [XM_226362]		FALSE
A_44_P375380	0.0216461	0.000563113	0.176663	-0.14142	-0.506792	0.438445	0.465022	XM_001054156	LOC679713	PREDICTED: Rattus norvegicus similar to bromodomain and PHD finger-containing protein 1 isoform 1 (LOC679713), mRNA [XM_001054156]	XM_001054156	FALSE
A_44_P914452	0.034168	0.00267677	-0.0491177	-0.39044	-0.721965	-0.00789082	-0.0851892	TC587696	TC587696	Q7TQ12_RAT (Q7TQ12) Aa1114, partial (9%) [TC587696]		FALSE
A_44_P471279	0.038671	0.00374522	0.0398033	-0.3893	-0.687089	0.701132	0.829117	ENSRNOT00000024450	RGD1310427_predicted	PREDICTED: Rattus norvegicus similar to KIAA0090 protein (predicted) (RGD1310427_predicted), mRNA [XM_342959]		FALSE
A_42_P455785	0.0222712	0.000686849	-0.0358974	-0.430502	-0.522041	0.12296	0.195225	NM_080781	Copb1	Rattus norvegicus coatomer protein complex, subunit beta 1 (Copb1), mRNA [NM_080781]	NM_080781	FALSE
A_42_P459349	0.0369859	0.00330601	0.591663	0.0791142	0.129323	-0.0581595	0.0329701	ENSRNOT00000005664	RGD1311939_predicted	PREDICTED: Rattus norvegicus similar to AI115348 protein (predicted) (RGD1311939_predicted), mRNA [XM_233838]		FALSE
A_44_P958404	0.0324114	0.00227371	-0.134885	-0.634842	-0.758295	0.108208	0.304125	BF567886	BF567886	BF567886 UI-R-BO0-aho-e-04-0-UI.r1 UI-R-BO0 Rattus norvegicus cDNA clone UI-R-BO0-aho-e-04-0-UI 5', mRNA sequence [BF567886]	BF567886	FALSE
A_44_P409645	0.0204026	0.000423104	0.242957	-0.116277	-0.059368	0.491101	0.693667	NM_001004247	Bmsc-UbP	Rattus norvegicus bone marrow stromal cell-derived ubiquitin-like protein (Bmsc-UbP), mRNA [NM_001004247]	NM_001004247	FALSE
A_44_P427200	0.0481032	0.00616785	0.426816	0.128271	0.087466	0.804852	1.10659	NM_133585	Opa1	Rattus norvegicus optic atrophy 1 homolog (human) (Opa1), mRNA [NM_133585]	NM_133585	FALSE
A_44_P492030	0.018045	6.35529e-05	-0.0104173	-0.302897	-0.807057	0.223961	0.516457	ENSRNOT00000003870	Tnfrsf11a	Tnfrsf11a protein. [Source:Uniprot/SPTREMBL;Acc:Q498S6] [ENSRNOT00000003870]		FALSE
A_44_P1034793	0.0200759	0.000330147	-0.284506	-0.607023	-0.541241	0.445365	0.475937	BC086371	Nedd4l	Rattus norvegicus neural precursor cell expressed, developmentally down-regulated 4-like, mRNA (cDNA clone IMAGE:7126721), complete cds. [BC086371]	BC086371	FALSE
A_44_P320884	0.0285048	0.00152841	-0.119679	-0.27137	-0.144992	0.91448	0.935022	NM_022231	Birc4	Rattus norvegicus baculoviral IAP repeat-containing 4 (Birc4), mRNA [NM_022231]	NM_022231	FALSE
A_43_P15667	0.0309922	0.0020009	0.77335	0.211786	0.456685	1.54699	1.57565	NM_001008370	MGC105830	Rattus norvegicus similar to Ras-related protein Rab-1B (MGC105830), mRNA [NM_001008370]	NM_001008370	FALSE
A_44_P111881	0.0359961	0.00311831	0.303124	-0.386513	-0.366173	0.319647	0.223706	ENSRNOT00000002836	ENSRNOT00000002836	Protein tyrosine phosphatase BRL-1 (Fragment). [Source:Uniprot/SPTREMBL;Acc:P70528] [ENSRNOT00000002836]		FALSE
A_44_P559080	0.0354339	0.00300856	0.0578322	-0.467416	-0.779952	0.0451937	0.039977	CF108752	CF108752	Shultzomica02003 Rat lung airway and parenchyma cDNA libraries Rattus norvegicus cDNA clone Contig1667 5', mRNA sequence [CF108752]	CF108752	FALSE
A_44_P200728	0.0336677	0.0024934	-0.138898	-0.328532	-0.325183	0.0782048	0.2367	AW919056	AW919056	AW919056 EST350360 Rat gene index, normalized rat, norvegicus, Bento Soares Rattus norvegicus cDNA clone RGIFC24 5' end, mRNA sequence [AW919056]	AW919056	FALSE
A_44_P295151	0.03387	0.0026014	0.925963	0.0609094	-0.257911	1.40778	1.43671	ENSRNOT00000012796	Flnb_predicted	Rattus norvegicus similar to actin-binding protein homolog ABP-278 (LOC306204), mRNA [XM_224561]		FALSE
A_44_P760291	0.0190992	0.000272984	-0.204519	-0.343742	-0.361317	0.296153	0.474224	TC593153	TC593153	Q9R161_MOUSE (Q9R161) Zinc finger protein ZFP235, partial (50%) [TC593153]		FALSE
A_44_P537843	0.0455734	0.00544607	0.654169	0.290142	0.389773	0.922023	1.27663	ENSRNOT00000043825	ENSRNOT00000043825	UI-R-A0-bf-c-12-0-UI.s1 UI-R-A0 Rattus norvegicus cDNA clone UI-R-A0-bf-c-12-0-UI 3' similar to gb [AA858648]		FALSE
A_44_P973186	0.02443	0.000898554	-0.0792767	-0.510405	-0.397727	0.546106	0.452722	AW142467	AW142467	AW142467 EST292719 Normalized rat embryo, Bento Soares Rattus sp. cDNA clone RGIAM52 5' end, mRNA sequence [AW142467]	AW142467	FALSE
A_42_P833613	0.0309922	0.0019978	0.516421	0.0611801	-0.00424933	0.825188	0.933437	NM_053735	Pi4k2a	Rattus norvegicus phosphatidylinositol 4-kinase type 2 alpha (Pi4k2a), mRNA [NM_053735]	NM_053735	FALSE
A_44_P254413	0.0343052	0.00270738	-0.433232	-0.89381	-1.26775	-0.17799	-0.296985	NM_057139	Hnrpu	Rattus norvegicus heterogeneous nuclear ribonucleoprotein U (Hnrpu), mRNA [NM_057139]	NM_057139	FALSE
A_44_P168594	0.0392384	0.00390061	0.350842	-0.0820429	-0.216404	0.394269	0.548149	ENSRNOT00000043112	Fbxo18_predicted	PREDICTED: Rattus norvegicus F-box only protein 18 (predicted) (Fbxo18_predicted), mRNA [XM_214505]		FALSE
A_44_P652863	0.0423741	0.00463024	0.124952	-0.227582	-0.302289	1.00184	0.894553	CF111229	CF111229	Shultzomica04480 Rat lung airway and parenchyma cDNA libraries Rattus norvegicus cDNA clone Contig3956 5', mRNA sequence [CF111229]	CF111229	FALSE
A_44_P845274	0.018045	6.5518e-05	0.204485	-0.384918	-0.379266	0.537251	0.412875	CO564641	CO564641	AGENCOURT_28449382 NIH_MGC_248 Rattus norvegicus cDNA clone IMAGE:7365627 5', mRNA sequence [CO564641]	CO564641	FALSE
A_44_P358361	0.0187873	0.00024629	0.347841	0.571374	0.0106814	0.227476	-0.18735	NM_001002821	H2-T18	Rattus norvegicus histocompatibility 2, T region locus 18 (H2-T18), mRNA [NM_001002821]	NM_001002821	FALSE
A_44_P913530	0.0169258	2.78143e-05	-0.14088	-0.309672	-0.534885	0.245902	0.315194	A_44_P913530	A_44_P913530			FALSE
A_44_P297659	0.018484	0.000163075	0.498106	0.132228	0.231891	1.40401	2.01368	XR_007127	LOC691504	PREDICTED: Rattus norvegicus similar to Zinc finger protein ZFPM1 (Zinc finger protein multitype 1) (Friend of GATA protein 1) (Friend of GATA-1) (FOG-1) (LOC691504), mRNA [XR_007127]	XR_007127	FALSE
A_43_P15245	0.0442965	0.00513595	-0.0664509	-0.478742	-0.964845	-0.600107	-0.768691	NM_012613	Npr1	Rattus norvegicus natriuretic peptide receptor 1 (Npr1), mRNA [NM_012613]	NM_012613	FALSE
A_44_P384698	0.0378161	0.00350173	0.307192	-0.0756691	0.0695516	0.72862	0.908519	XR_005954	LOC297785	PREDICTED: Rattus norvegicus hypothetical LOC297785 (LOC297785), mRNA [XR_005954]	XR_005954	FALSE
A_43_P11075	0.0231147	0.000758629	-0.231403	-0.35699	-0.512262	-0.202579	-0.141088	ENSRNOT00000004494	RGD1563952_predicted	PREDICTED: Rattus norvegicus similar to Mospd2 protein (predicted) (RGD1563952_predicted), mRNA [XM_343782]		FALSE
A_43_P20951	0.0256092	0.00105621	-0.0519454	-0.389075	-0.411869	0.805836	0.741581	ENSRNOT00000055875	Anapc1_predicted	Rattus norvegicus similar to tsg24 (LOC311412), mRNA [XM_230589]		FALSE
A_44_P176494	0.0231147	0.000766148	-0.114251	-0.353648	-0.604067	0.108304	0.227679	NM_001024769	Cdc73	Rattus norvegicus cell division cycle 73, Paf1/RNA polymerase II complex component, homolog (S. cerevisiae) (Cdc73), mRNA [NM_001024769]	NM_001024769	FALSE
A_44_P405321	0.039234	0.0038963	0.32524	-0.0932822	0.130419	0.666548	0.849487	ENSRNOT00000050860	RGD1561881_predicted	PREDICTED: Rattus norvegicus similar to glyceraldehyde-3-phosphate dehydrogenase (phosphorylating) (EC 1.2.1.12) (predicted) (RGD1561881_predicted), mRNA [XM_219750]		FALSE
A_44_P175461	0.0353328	0.00296015	0.494337	-0.123108	-0.166661	1.00093	1.05992	ENSRNOT00000006290	RGD1565602_predicted	PREDICTED: Rattus norvegicus similar to PLU1 (predicted) (RGD1565602_predicted), mRNA [XM_239761]		FALSE
A_44_P762190	0.0394762	0.00396989	0.288619	0.0565652	-0.0856144	1.15786	0.857122	TC610921	TC610921	Q2PP26_CARAU (Q2PP26) L-type calcium channel alpha 1 subunit Cav1.3a (Fragment), partial (4%) [TC610921]		FALSE
A_43_P12070	0.0338325	0.00252503	-0.102457	1.36151	-0.66524	1.28202	-0.0531856	NM_020103	Ly6c	Rattus norvegicus Ly6-C antigen (Ly6c), mRNA [NM_020103]	NM_020103	FALSE
A_42_P810395	0.0334885	0.00246624	0.107746	-0.492401	-1.25154	-0.881985	-1.00059	BG668499	BG668499	BG668499 DRA06G10 Rat DRG Library Rattus norvegicus cDNA clone DRA06G10 5', mRNA sequence [BG668499]	BG668499	FALSE
A_42_P516379	0.0239431	0.000835261	-0.755424	-1.21904	-1.24636	0.365045	0.14544	CF106882	CF106882	Shultzomica00133 Rat lung airway and parenchyma cDNA libraries Rattus norvegicus cDNA clone Contig2296 5', mRNA sequence [CF106882]	CF106882	FALSE
A_42_P644929	0.020081	0.000356672	-0.0393729	-0.443939	-0.536321	0.424403	0.71409	NM_021579	Nxf1	Rattus norvegicus nuclear RNA export factor 1 (Nxf1), mRNA [NM_021579]	NM_021579	FALSE
A_44_P377731	0.0478781	0.00611396	0.125657	0.108814	0.25407	0.720939	0.949301	NM_001007651	Peflin	Rattus norvegicus PEF protein with a long N-terminal hydrophobic domain (Peflin), mRNA [NM_001007651]	NM_001007651	FALSE
A_44_P140225	0.0405716	0.00423366	0.229832	-0.385786	-0.557147	0.423322	0.649729	ENSRNOT00000040029	ENSRNOT00000040029	PREDICTED: Rattus norvegicus eukaryotic translation initiation factor 4 gamma, 1 (Eif4g1), mRNA [XM_213569]		FALSE
A_44_P745579	0.0336677	0.00249832	-0.212307	-0.378376	-0.698804	0.177379	0.141839	TC584984	TC584984			FALSE
A_44_P620356	0.0400679	0.00411787	0.0150682	-0.433986	-0.716899	-0.525589	-0.416203	AW917690	AW917690	AW917690 EST348994 Rat gene index, normalized rat, norvegicus, Bento Soares Rattus norvegicus cDNA clone RGIEG85 5' end, mRNA sequence [AW917690]	AW917690	FALSE
A_44_P249752	0.0344795	0.00274578	-0.75264	-0.33633	-0.41999	-1.11395	-1.24234	BF285101	BF285101	BF285101 EST449692 Rat Gene Index, normalized rat, Rattus norvegicus cDNA Rattus norvegicus cDNA clone RGIFA46, mRNA sequence [BF285101]	BF285101	FALSE
A_44_P470505	0.0499236	0.00666206	-0.264977	-0.0501891	-0.400048	-0.836218	-0.835982	NM_183052	Ube2v2	Rattus norvegicus ubiquitin-conjugating enzyme E2 variant 2 (Ube2v2), mRNA [NM_183052]	NM_183052	FALSE
A_44_P383965	0.0218785	0.00058128	0.38676	-0.20614	-0.333735	1.15796	1.24084	NM_017211	Glg1	Rattus norvegicus golgi apparatus protein 1 (Glg1), mRNA [NM_017211]	NM_017211	FALSE
A_44_P196685	0.0286631	0.00157295	-0.128491	-0.305678	-0.728251	-0.706826	-0.391483	XM_341907	Eif4g2_predicted	PREDICTED: Rattus norvegicus eukaryotic translation initiation factor 4, gamma 2 (predicted) (Eif4g2_predicted), mRNA [XM_341907]	XM_341907	FALSE
A_44_P499702	0.020908	0.00049847	0.276601	0.153821	0.358262	0.930885	1.2224	ENSRNOT00000008279	Cables2_predicted	PREDICTED: Rattus norvegicus Cdk5 and Abl enzyme substrate 2 (predicted) (Cables2_predicted), mRNA [XM_230952]		FALSE
A_43_P18296	0.0309922	0.0020008	0.163871	-0.0393668	0.118259	0.251915	0.579241	ENSRNOT00000041389	ENSRNOT00000041389	E3 ubiquitin-protein ligase rififylin (EC 6.3.2.-) (RING finger and FYVE-like domain-containing protein 1) (FYVE-RING finger protein Sakura). [Source:Uniprot/SWISSPROT;Acc:Q8CIN9] [ENSRNOT00000041389]		FALSE
A_43_P10019	0.018484	0.000177775	-0.219261	-0.142356	-0.45742	-1.1249	-0.847647	NM_001004225	RGD1303003	Rattus norvegicus homolog of zebrafish ES1 (RGD1303003), mRNA [NM_001004225]	NM_001004225	FALSE
A_44_P272404	0.0270584	0.00127505	-0.0523581	-0.387438	-0.528526	0.52596	0.637419	XM_001074875	LOC686616	PREDICTED: Rattus norvegicus similar to gem (nuclear organelle) associated protein 5 (LOC686616), mRNA [XM_001074875]	XM_001074875	FALSE
A_44_P301621	0.0493829	0.0065196	-0.0672475	-0.178442	-0.167154	0.838976	0.849982	NM_172018	Pp3111	Rattus norvegicus PP3111 protein (Pp3111), mRNA [NM_172018]	NM_172018	FALSE
A_44_P347970	0.0433636	0.00488161	-0.266594	-0.506871	-0.897712	-0.0795747	-0.0265523	AW142620	AW142620	AW142620 EST292872 Normalized rat embryo, Bento Soares Rattus sp. cDNA clone RGIAQ91 5' end, mRNA sequence [AW142620]	AW142620	FALSE
A_44_P1039205	0.0190847	0.00026433	0.146612	0.838754	0.0176103	-2.93856	-2.25356	M23721	M23721	RATCPA208 Rat carboxypeptidase (CA2) gene, exon 11 [M23721]	M23721	FALSE
A_44_P803025	0.0169896	3.44749e-05	-0.0751752	-0.237079	-0.569742	-0.922568	-1.12066	AW915673	AW915673	AW915673 EST346977 Normalized rat embryo, Bento Soares Rattus sp. cDNA clone RGICZ25 5' end, mRNA sequence [AW915673]	AW915673	FALSE
A_44_P440517	0.0284849	0.00151996	0.362417	0.458128	0.0317128	0.271264	0.0356116	NM_001008842	RT1-CE4	Rattus norvegicus RT1 class I, CE4 (RT1-CE4), mRNA [NM_001008842]	NM_001008842	FALSE
A_44_P776252	0.0190992	0.000273127	-0.0330687	-0.0883963	-0.187556	0.522499	0.562895	TC583158	TC583158			FALSE
A_44_P929104	0.0460457	0.00558055	-0.0232176	-0.314852	-0.59455	-0.434811	-0.288867	ENSRNOT00000056305	RGD1560964_predicted	PREDICTED: Rattus norvegicus similar to XAP-5 protein (predicted) (RGD1560964_predicted), mRNA [XM_215220]		FALSE
A_44_P112586	0.0410503	0.00433961	-0.161752	-0.301371	-0.50684	0.492488	0.638797	ENSRNOT00000031352	RGD1560909_predicted	PREDICTED: Rattus norvegicus similar to DNA segment, Chr 1, Brigham & Womens Genetics 0212 expressed (predicted) (RGD1560909_predicted), mRNA [XM_343560]		FALSE
A_44_P960035	0.0366551	0.00323551	-0.348616	-0.871915	-1.55112	-0.924134	-1.22701	XM_239329	Mllt6_predicted	PREDICTED: Rattus norvegicus myeloid [XM_239329]	XM_239329	FALSE
A_44_P686854	0.0421091	0.00455675	-0.0288614	-0.25238	-0.383035	1.15445	0.558624	BC129127	RGD1563224_predicted	Rattus norvegicus similar to 4930438D12Rik protein (predicted), mRNA (cDNA clone MGC:156815 IMAGE:7190631), complete cds [BC129127]	BC129127	FALSE
A_44_P988511	0.0452502	0.00538103	-0.0163839	-0.15468	-0.392726	0.194011	0.280983	XM_342530	Csrp2bp_predicted	PREDICTED: Rattus norvegicus cysteine and glycine-rich protein 2 binding protein (predicted) (Csrp2bp_predicted), mRNA [XM_342530]	XM_342530	FALSE
A_44_P301799	0.020081	0.000350048	-0.0704067	-0.107811	-0.153409	0.356968	0.555433	NM_080402	Ryk	Rattus norvegicus receptor-like tyrosine kinase (Ryk), mRNA [NM_080402]	NM_080402	FALSE
A_44_P337351	0.0459573	0.00554344	0.154908	-0.0729644	-0.380505	-1.65323	-1.39245	NM_001033883	Cxcl12	Rattus norvegicus chemokine (C-X-C motif) ligand 12 (Cxcl12), transcript variant 3, mRNA [NM_001033883]	NM_001033883	FALSE
A_43_P10934	0.0344795	0.00274768	-0.176945	-0.451353	-0.885726	-0.475835	-0.525886	XM_225885	Fbxo38_predicted	PREDICTED: Rattus norvegicus F-box protein 38 (predicted) (Fbxo38_predicted), mRNA [XM_225885]	XM_225885	FALSE
A_44_P915194	0.0394762	0.00397188	-0.229412	-0.155009	-0.365031	-0.612526	-0.667419	TC600511	TC600511			FALSE
A_44_P232026	0.0256092	0.00102294	-0.17587	-0.27045	-0.300348	0.595541	0.704164	XM_342776	RGD1306151_predicted	PREDICTED: Rattus norvegicus similar to hypothetical protein DKFZp761D0211 (predicted) (RGD1306151_predicted), mRNA [XM_342776]	XM_342776	FALSE
A_43_P19606	0.0396352	0.00403361	0.450908	-0.298991	-0.266269	0.707519	0.711026	XM_001071999	Slc12a7	PREDICTED: Rattus norvegicus solute carrier family 12 (potassium [XM_001071999]	XM_001071999	FALSE
A_44_P356503	0.0485591	0.00630675	0.120913	-0.338485	-0.507578	0.208327	0.105398	ENSRNOT00000021562	RGD1562232_predicted	similar to microfibrillar-associated protein 1 (LOC365673), mRNA [Source:RefSeq_dna;Acc:XR_009024] [ENSRNOT00000021562]		FALSE
A_44_P276352	0.0222712	0.00068146	0.0437824	0.176831	-0.247966	-0.437937	-0.945522	NM_013058	Id3	Rattus norvegicus inhibitor of DNA binding 3 (Id3), mRNA [NM_013058]	NM_013058	FALSE
A_44_P496262	0.0273638	0.00133195	-0.0542895	-0.0938434	-0.249972	0.399671	0.423006	NM_012922	Casp3	Rattus norvegicus caspase 3, apoptosis related cysteine protease (Casp3), mRNA [NM_012922]	NM_012922	FALSE
A_44_P975304	0.0419722	0.00452295	-0.123322	-0.478308	-0.738738	-0.231124	-0.391582	TC590343	TC590343			FALSE
A_44_P523112	0.035463	0.00302189	-0.0638446	-0.359876	-0.53631	0.0346745	0.265832	ENSRNOT00000019802	RGD1306148_predicted	Rattus norvegicus similar to KIAA0368 (LOC313196), mRNA [XM_232937]		FALSE
A_43_P19173	0.0203907	0.000412667	-0.00269365	-0.458781	-0.903923	-0.162126	-0.0373245	XM_216724	Sdccag1	PREDICTED: Rattus norvegicus serologically defined colon cancer antigen 1 (Sdccag1), mRNA [XM_216724]	XM_216724	FALSE
A_44_P715158	0.0323972	0.00226294	0.234366	-0.0115046	-0.391262	-0.144901	-0.17506	A_44_P715158	A_44_P715158			FALSE
A_44_P914899	0.0204026	0.000418333	0.0135396	-0.439443	-1.01559	-0.0658835	-0.555376	TC591295	TC591295			FALSE
A_44_P101375	0.0376531	0.0034587	0.206057	-0.351612	-0.465555	0.212723	0.323259	NM_001005541	Vps16	Rattus norvegicus vacuolar protein sorting 16 (yeast) (Vps16), mRNA [NM_001005541]	NM_001005541	FALSE
A_44_P175681	0.0183556	0.000152963	-0.199028	-0.301755	-0.249322	0.247321	0.404127	NM_001014011	Gramd3	Rattus norvegicus GRAM domain containing 3 (Gramd3), mRNA [NM_001014011]	NM_001014011	FALSE
A_44_P991121	0.0197154	0.00031534	-0.210283	-0.3222	-0.698792	-0.738066	-0.764904	ENSRNOT00000001464	ENSRNOT00000001464	Androgen-induced proliferation inhibitor (Fragment). [Source:Uniprot/SPTREMBL;Acc:Q6TRW4] [ENSRNOT00000001464]		FALSE
A_42_P668858	0.020908	0.000518835	0.367761	-0.0820835	-0.0523322	0.823482	1.04843	NM_013103	Tcf2	Rattus norvegicus transcription factor 2 (Tcf2), mRNA [NM_013103]	NM_013103	FALSE
A_44_P159586	0.0420807	0.00454296	-0.525304	-0.812241	-1.32974	-0.22354	-0.495955	BF565379	BF565379	BF565379 UI-R-BO1-ajv-d-01-0-UI.r1 UI-R-BO1 Rattus norvegicus cDNA clone UI-R-BO1-ajv-d-01-0-UI 5', mRNA sequence [BF565379]	BF565379	FALSE
A_43_P22685	0.0303387	0.00188395	0.20151	-0.496489	-0.588746	0.448611	0.612887	NM_001009637	Lars	Rattus norvegicus leucyl-tRNA synthetase (Lars), mRNA [NM_001009637]	NM_001009637	FALSE
A_44_P295669	0.0240772	0.000848044	-0.12404	-0.360873	-0.696856	-0.07512	-0.070757	XM_341605	Rbm27_predicted	PREDICTED: Rattus norvegicus RNA binding motif protein 27 (predicted) (Rbm27_predicted), mRNA [XM_341605]	XM_341605	FALSE
A_44_P139744	0.020081	0.000340694	0.0423027	0.188177	-0.253035	-0.411795	-0.907575	NM_013058	Id3	Rattus norvegicus inhibitor of DNA binding 3 (Id3), mRNA [NM_013058]	NM_013058	FALSE
A_44_P356492	0.0499089	0.00665711	-0.191765	-0.330124	-0.518316	-0.118038	0.018886	NM_001010963	LOC362154	Rattus norvegicus brain zinc finger protein (LOC362154), mRNA [NM_001010963]	NM_001010963	FALSE
A_44_P1027405	0.034795	0.00282571	-0.614308	-0.359973	-0.184419	0.675229	1.35983	ENSRNOT00000019878	Raph1_predicted	Rattus norvegicus similar to amyotrophic lateral sclerosis 2 chromosome region candidate 9; putative GTPase regulator (LOC363239), mRNA [XM_343579]		FALSE
A_44_P561667	0.0338452	0.00256313	-0.563982	-0.577239	-0.70106	-0.108471	0.119263	TC583730	TC583730	P74437_SYNY3 (P74437) Sll0354 protein, partial (10%) [TC583730]		FALSE
A_44_P790393	0.0322433	0.00220484	-0.0167241	-0.296307	-0.294808	0.185827	0.442061	CK603271	LOC681708	AGENCOURT_17895151 NIH_MGC_234 Rattus norvegicus cDNA clone IMAGE:7192830 5', mRNA sequence [CK603271]	CK603271	FALSE
A_44_P897620	0.047391	0.00595879	-0.0204399	-0.27846	-0.15434	0.388792	0.716655	BQ781487	BQ781487	UI-R-FF0-cpg-g-19-0-UI.s1 UI-R-FF0 Rattus norvegicus cDNA clone UI-R-FF0-cpg-g-19-0-UI 3', mRNA sequence [BQ781487]	BQ781487	FALSE
A_43_P12085	0.0344795	0.00275006	-1.03096	-0.470774	-0.584813	-1.83907	-1.869	NM_021596	Dbil5	Rattus norvegicus diazepam binding inhibitor-like 5 (Dbil5), mRNA [NM_021596]	NM_021596	FALSE
A_44_P398587	0.0294903	0.00172528	0.074788	-0.405017	-0.468824	0.547205	0.665353	ENSRNOT00000048980	Usp9x_predicted	Rattus norvegicus similar to FAM (LOC363445), mRNA [XM_343766]		FALSE
A_44_P142016	0.0267415	0.0012292	-0.152101	-0.488496	-0.62153	0.405459	0.285907	NM_019163	Psen1	Rattus norvegicus presenilin 1 (Psen1), mRNA [NM_019163]	NM_019163	FALSE
A_44_P440842	0.0294903	0.00172389	-0.199728	-0.731468	-0.876556	-0.140585	-0.0683249	ENSRNOT00000028709	ENSRNOT00000028709	PREDICTED: Rattus norvegicus SET domain, bifurcated 1 (predicted) (Setdb1_predicted), mRNA [XM_001060316]		FALSE
A_43_P22750	0.0239431	0.000836206	-0.153286	-0.342115	-0.175405	0.382417	0.732007	ENSRNOT00000036200	ENSRNOT00000036200	Rattus norvegicus similar to Ral-A exchange factor RalGPS2 (LOC304887), mRNA [XM_222773]		FALSE
A_44_P412427	0.0411788	0.00435519	-0.139991	-0.634136	-1.42116	0.0351328	-0.451337	XM_001072042	RGD1311475_predicted	PREDICTED: Rattus norvegicus similar to FLJ00354 protein (predicted) (RGD1311475_predicted), mRNA [XM_001072042]	XM_001072042	FALSE
A_44_P559041	0.035463	0.00301928	-0.167437	-0.505316	-0.639124	0.00740087	0.101218	ENSRNOT00000018487	Ighmbp2	immunoglobulin mu binding protein 2 [Source:RefSeq_peptide;Acc:NP_113774] [ENSRNOT00000018487]		FALSE
A_44_P127740	0.044445	0.00516617	0.156413	0.214815	0.0537633	-0.319897	-0.340018	NM_001014085	Maf1	Rattus norvegicus MAF1 homolog (S. cerevisiae) (Maf1), mRNA [NM_001014085]	NM_001014085	FALSE
A_42_P525454	0.018484	0.000213487	-0.222808	-0.984628	-1.45812	-0.911805	-1.15593	ENSRNOT00000014310	Tenc1_predicted	PREDICTED: Rattus norvegicus tensin like C1 domain containing phosphatase (predicted) (Tenc1_predicted), mRNA [XM_235710]		FALSE
A_43_P15788	0.0319297	0.00215592	0.703213	-0.0745837	-0.026388	0.818207	0.912374	ENSRNOT00000019584	Kifc3	Kinesin-related protein KRP4 (Fragment). [Source:Uniprot/SPTREMBL;Acc:O54721] [ENSRNOT00000019584]		FALSE
A_42_P672793	0.0410226	0.00432868	0.00372124	-0.436204	-0.701949	0.24656	0.324703	ENSRNOT00000028170	Pcnxl3	PREDICTED: Rattus norvegicus pecanex-like 3 (Drosophila) (Pcnxl3), mRNA [XM_219515]		FALSE
A_44_P1020967	0.0221841	0.000645045	-0.219361	-0.621239	-0.774807	0.774243	0.872465	ENSRNOT00000021952	ENSRNOT00000021952	Rattus norvegicus similar to Wolf-Hirschhorn syndrome candidate 1 protein isoform 1; IL5 promoter REII region-binding protein; trithorax/ash1-related protein 5; multiple myeloma SET domain protein (LOC305456), mRNA [XM_223540]		FALSE
A_44_P1011147	0.0352421	0.00291352	-0.613775	-0.570436	-0.818295	0.077337	0.135244	XM_001078082	LOC310958	PREDICTED: Rattus norvegicus similar to zinc finger, ZZ domain containing 3 (LOC310958), mRNA [XM_001078082]	XM_001078082	FALSE
A_42_P554928	0.0300599	0.00182659	-0.283403	-0.456195	-0.657344	-0.152694	0.0130398	AW144225	AW144225	AW144225 EST294521 Normalized rat ovary, Bento Soares Rattus sp. cDNA clone RGICN17 5' end, mRNA sequence [AW144225]	AW144225	FALSE
A_43_P15303	0.0385516	0.00371037	-0.0211602	-0.396132	-0.814502	-0.765095	-0.45497	NM_030836	Arts1	Rattus norvegicus type 1 tumor necrosis factor receptor shedding aminopeptidase regulator (Arts1), mRNA [NM_030836]	NM_030836	FALSE
A_44_P274986	0.018484	0.000216581	-0.364702	-0.550951	-0.548251	0.4292	0.272521	BU671460	BU671460	BU671460 NISC_lr09b08.y1 NCI_CGAP_Pr49 Rattus norvegicus cDNA clone IMAGE:5598662 5', mRNA sequence [BU671460]	BU671460	FALSE
A_43_P11221	0.0292955	0.00169691	-0.059667	-0.316015	-0.381866	0.0328294	0.229107	BC091419	Afg3l2	Rattus norvegicus AFG3(ATPase family gene 3)-like 2 (yeast), mRNA (cDNA clone IMAGE:7365290), complete cds. [BC091419]	BC091419	FALSE
A_44_P468117	0.0263791	0.00117671	0.140164	-0.126435	-0.135408	0.512447	0.731075	ENSRNOT00000018043	RGD1564625_predicted	PREDICTED: Rattus norvegicus similar to transmembrane protein TM9SF3 (predicted) (RGD1564625_predicted), mRNA [XM_220013]		FALSE
A_44_P547647	0.0290136	0.00163419	-0.0418993	0.0907129	-0.0325212	-0.590062	-0.627254	BM986620	BM986620	BM986620 EST594214 Rat gene index, normalized rat, norvegicus Rattus norvegicus cDNA clone RGOAD63 3' end, mRNA sequence [BM986620]	BM986620	FALSE
A_44_P314536	0.0412306	0.00436871	-0.349184	0.0544826	0.145558	-0.618607	-0.763329	BI296346	BI296346	BI296346 UI-R-DK0-cez-c-09-0-UI.s1 UI-R-DK0 Rattus norvegicus cDNA clone UI-R-DK0-cez-c-09-0-UI 3', mRNA sequence [BI296346]	BI296346	FALSE
A_42_P558206	0.0256092	0.0010403	-0.217322	-0.806624	-1.23094	-0.121134	-0.17552	AW144330	AW144330	AW144330 EST294626 Normalized rat ovary, Bento Soares Rattus sp. cDNA clone RGICQ32 5' end, mRNA sequence [AW144330]	AW144330	FALSE
A_44_P553347	0.0182041	0.000122394	-0.689558	-1.30112	-1.26543	0.182149	0.295826	ENSRNOT00000003834	ENSRNOT00000003834	PREDICTED: Rattus norvegicus RNA binding motif protein 25 (predicted) (Rbm25_predicted), mRNA [XM_345703]		FALSE
A_44_P988046	0.0348173	0.00283091	-0.134182	-0.582007	-0.794351	-0.0512706	0.265869	BG668924	BG668924	BG668924 DRN03C03 Rat DRG Library Rattus norvegicus cDNA clone DRN03C03 5', mRNA sequence [BG668924]	BG668924	FALSE
A_44_P396239	0.0367172	0.00324654	-0.0713901	-0.397058	-0.51452	0.164968	0.271604	NM_001012093	Zfp64	Rattus norvegicus zinc finger protein 64 (Zfp64), mRNA [NM_001012093]	NM_001012093	FALSE
A_44_P425619	0.0256544	0.00106751	-0.234997	-0.301527	-0.233338	0.787735	0.783723	ENSRNOT00000012701	Pgm3_predicted	PREDICTED: Rattus norvegicus phosphoglucomutase 3 (predicted) (Pgm3_predicted), mRNA [XM_343442]		FALSE
A_44_P374375	0.0395407	0.00401436	-0.80901	-0.347374	-0.416225	-1.58293	-1.17169	BI295101	Apom	UI-R-DK0-cef-g-12-0-UI.s1 UI-R-DK0 Rattus norvegicus cDNA clone UI-R-DK0-cef-g-12-0-UI 3', mRNA sequence [BI295101]	BI295101	FALSE
A_44_P1011664	0.0333971	0.00244263	-0.245668	-0.536251	-0.625504	-0.0464636	0.0143384	XM_216386	Ctnnal1_predicted	PREDICTED: Rattus norvegicus catenin (cadherin associated protein), alpha-like 1 (predicted) (Ctnnal1_predicted), mRNA [XM_216386]	XM_216386	FALSE
A_42_P477073	0.0255109	0.000999211	0.0171045	-0.154348	-0.286827	0.0514556	0.27104	NM_019201	Ctbp1	Rattus norvegicus C-terminal binding protein 1 (Ctbp1), mRNA [NM_019201]	NM_019201	FALSE
A_44_P268168	0.0323292	0.00223436	0.41928	-0.0680866	-0.244707	0.461319	0.394398	XM_001069404	LOC686310	PREDICTED: Rattus norvegicus similar to Ephrin type-B receptor 4 precursor (Tyrosine-protein kinase receptor MDK-2) (Developmental kinase 2) (Tyrosine kinase MYK-1), transcript variant 3 (LOC686310), mRNA [XM_001069404]	XM_001069404	FALSE
A_44_P708147	0.0400951	0.00413037	-0.0843233	-0.160711	-0.222384	0.313969	0.437493	ENSRNOT00000055469	ENSRNOT00000055469	similar to nemo like kinase (LOC365949), mRNA [Source:RefSeq_dna;Acc:XR_009210] [ENSRNOT00000055469]		FALSE
A_44_P718305	0.0300599	0.00183415	-0.503222	-0.529166	-0.737684	-0.232966	-0.0762079	ENSRNOT00000055390	Atf1	Atf1 protein (Fragment). [Source:Uniprot/SPTREMBL;Acc:Q5BK34] [ENSRNOT00000055390]		FALSE
A_44_P357579	0.0440052	0.00507431	-0.177744	-0.508144	-0.95762	-0.25737	-0.174316	BC085914	Ddx3x	Rattus norvegicus DEAD [BC085914]	BC085914	FALSE
A_44_P319169	0.0256092	0.0010309	0.0608087	-0.368858	-0.626243	0.0452253	0.144005	ENSRNOT00000023696	ENSRNOT00000023696	E3 ubiquitin-protein ligase MIB2 (EC 6.3.2.-) (Mind bomb homolog 2) (RBSC-skeletrophin/dystrophin-like polypeptide). [Source:Uniprot/SWISSPROT;Acc:Q68LP1] [ENSRNOT00000023696]		FALSE
A_44_P405183	0.0182041	0.000102876	-0.207657	-0.4514	-0.7955	0.218251	0.415332	ENSRNOT00000048838	ENSRNOT00000048838	ubiquitin specific peptidase 15 [Source:MarkerSymbol;Acc:MGI:101857] [ENSRNOT00000048838]		FALSE
A_44_P370175	0.0401128	0.00413688	-0.0838573	-0.436186	-0.855133	0.0945755	0.163662	NM_031773	Rpo1-2	Rattus norvegicus RNA polymerase 1-2 (Rpo1-2), mRNA [NM_031773]	NM_031773	FALSE
A_44_P159292	0.020908	0.00051709	0.173391	-0.570983	-0.64254	0.796956	0.920328	ENSRNOT00000024864	Chd4	Mi-2 autoantigen (Fragment). [Source:Uniprot/SPTREMBL;Acc:O88747] [ENSRNOT00000024864]		FALSE
A_44_P267218	0.0200759	0.000331397	0.307613	-0.531851	-1.23847	0.501501	0.260504	ENSRNOT00000037050	Hbxap_predicted	Rattus norvegicus similar to HBV pX associated protein 8 large isoform (LOC308839), mRNA [XM_218939]		FALSE
A_44_P668678	0.0256544	0.00106712	-0.202114	-0.35041	-0.765837	-0.563861	-0.446556	TC588875	TC588875			FALSE
A_43_P11444	0.0474627	0.00598239	0.737589	1.19572	1.1587	-1.67106	-0.864833	NM_012521	S100g	Rattus norvegicus S100 calcium binding protein G (S100g), mRNA [NM_012521]	NM_012521	FALSE
A_44_P151933	0.0491662	0.00644547	-0.0342495	-0.855992	-0.96995	0.35304	-0.0447178	ENSRNOT00000041062	RGD1562784_predicted	PREDICTED: Rattus norvegicus similar to hypothetical protein (predicted) (RGD1562784_predicted), mRNA [XM_219560]		FALSE
A_44_P456268	0.0277596	0.00141418	0.879236	-0.0840729	-0.565671	0.06923	-0.331386	AW142682	AW142682	AW142682 EST292934 Normalized rat embryo, Bento Soares Rattus sp. cDNA clone RGIAS25 5' end, mRNA sequence [AW142682]	AW142682	FALSE
A_44_P853775	0.0273638	0.00133289	0.189	-0.170353	-0.739812	-0.533825	-0.756039	XM_001077260	LOC691221	PREDICTED: Rattus norvegicus similar to CG1998-PA (LOC691221), mRNA [XM_001077260]	XM_001077260	FALSE
A_44_P368065	0.0282697	0.00148441	0.303124	1.00997	1.50886	-0.314172	-0.118184	NM_001013054	Adprhl1	Rattus norvegicus ADP-ribosylhydrolase like 1 (Adprhl1), mRNA [NM_001013054]	NM_001013054	FALSE
A_44_P803912	0.0455801	0.00545354	-0.319413	-0.290022	-0.464196	0.223138	0.466046	AW920791	AW920791	AW920791 EST352095 Rat gene index, normalized rat, norvegicus, Bento Soares Rattus norvegicus cDNA clone RGIHC51 5' end, mRNA sequence [AW920791]	AW920791	FALSE
A_44_P252921	0.0256092	0.00102018	-0.461697	-0.654952	-0.972822	0.240298	0.146658	BC098824	Sec23ip	Rattus norvegicus SEC23 interacting protein, mRNA (cDNA clone IMAGE:7377967), complete cds. [BC098824]	BC098824	FALSE
A_44_P945404	0.0346132	0.00279107	-0.00230461	-0.599281	-0.539527	1.21261	1.16798	TC594748	TC594748	Q3N6I0_9DELT (Q3N6I0) Pyruvate kinase , partial (4%) [TC594748]		FALSE
A_43_P17246	0.0222218	0.000672271	0.233476	-0.224069	-0.430146	0.523439	0.772193	ENSRNOT00000026552	Ipo4_predicted	PREDICTED: Rattus norvegicus importin 4 (predicted) (Ipo4_predicted), mRNA [XM_214199]		FALSE
A_44_P467942	0.0197154	0.00031901	0.12582	-0.498497	-0.501857	1.03725	1.12842	NM_001031822	Copg	Rattus norvegicus coatomer protein complex, subunit gamma (Copg), mRNA [NM_001031822]	NM_001031822	FALSE
A_44_P387760	0.039318	0.00393429	-0.314494	0.00991696	-0.0763546	-1.36583	-0.763467	AI029212	AI029212	UI-R-C0-ip-e-06-0-UI.s1 UI-R-C0 Rattus norvegicus cDNA clone UI-R-C0-ip-e-06-0-UI 3', mRNA sequence [AI029212]	AI029212	FALSE
A_44_P548257	0.0460457	0.00558522	-0.320014	-0.199971	-0.0720965	-0.566229	-0.689915	ENSRNOT00000009712	Tmem58_predicted	transmembrane protein 58 (predicted) (Tmem58_predicted), mRNA [Source:RefSeq_dna;Acc:NM_001077826] [ENSRNOT00000009712]		FALSE
A_44_P531063	0.0294903	0.00173836	-0.236892	-0.510753	-0.733514	0.267709	0.174143	NM_031643	Map2k1	Rattus norvegicus mitogen activated protein kinase kinase 1 (Map2k1), mRNA [NM_031643]	NM_031643	FALSE
A_44_P130063	0.020081	0.00034709	0.0724257	0.211598	0.0730523	-0.572475	-0.937035	AA900791	AA900791	AA900791 UI-R-E0-dn-g-11-0-UI.s1 UI-R-E0 Rattus norvegicus cDNA clone UI-R-E0-dn-g-11-0-UI 3' similar to gi [AA900791]	AA900791	FALSE
A_44_P1012668	0.0204026	0.000419181	-0.344937	-0.974005	-1.23633	-0.0657268	0.0390946	AA900363	AA900363	UI-R-E0-cm-e-04-0-UI.s2 UI-R-E0 Rattus norvegicus cDNA clone UI-R-E0-cm-e-04-0-UI 3' similar to gi [AA900363]	AA900363	FALSE
A_44_P684379	0.0307485	0.00195183	-0.161298	-0.519997	-0.494613	0.723453	1.20219	TC596778	TC596778	Q25LL7_MACFA (Q25LL7) Brain cDNA, clone: QflA-10409, partial (25%) [TC596778]		FALSE
A_44_P956070	0.0203907	0.000391263	-0.062049	-0.200145	-0.228909	0.256231	0.53987	XM_575086	RGD1563595_predicted	PREDICTED: Rattus norvegicus similar to Endoplasmic reticulum mannosyl-oligosaccharide 1,2-alpha-mannosidase (ER alpha-1,2-mannosidase) (predicted) (RGD1563595_predicted), mRNA [XM_575086]	XM_575086	FALSE
A_44_P271720	0.0344795	0.00275011	0.100963	-0.272714	-0.355292	0.838609	0.780778	NM_022523	Cd151	Rattus norvegicus CD151 antigen (Cd151), mRNA [NM_022523]	NM_022523	FALSE
A_44_P105634	0.0448814	0.00525543	0.397046	0.268957	0.495101	0.911843	1.13751	NM_001007658	RGD1359378	Rattus norvegicus mesenchymal stem cell protein DSCD75 (RGD1359378), mRNA [NM_001007658]	NM_001007658	FALSE
A_44_P436123	0.018484	0.000190928	-0.0759898	0.208913	-0.12687	-0.789565	-0.841151	NM_001017466	MGC108776	Rattus norvegicus Snf7 homologue associated with Alix 3 (MGC108776), mRNA [NM_001017466]	NM_001017466	FALSE
A_44_P364678	0.0482411	0.00620319	-0.335972	-0.486795	-0.349327	0.396943	0.313501	BF550568	BF550568	BF550568 UI-R-C0-jl-b-08-0-UI.r1 UI-R-C0 Rattus norvegicus cDNA clone UI-R-C0-jl-b-08-0-UI 5', mRNA sequence [BF550568]	BF550568	FALSE
A_44_P436473	0.0175623	5.50385e-05	-0.0484437	0.136609	-0.264779	-1.12463	-1.17006	XM_001079851	LOC691849	PREDICTED: Rattus norvegicus hypothetical protein LOC691849 (LOC691849), mRNA [XM_001079851]	XM_001079851	FALSE
A_44_P377635	0.0322433	0.00220141	-0.123476	-0.541885	-0.885982	0.229943	0.138769	ENSRNOT00000047719	ENSRNOT00000047719	Bcl6 interacting corepressor (predicted) (Bcor_predicted), mRNA [Source:RefSeq_dna;Acc:XR_009547] [ENSRNOT00000047719]		FALSE
A_44_P871622	0.0435595	0.00498853	-0.100836	-0.417743	-0.535702	0.251766	0.486743	ENSRNOT00000028462	Syvn1	Syvn1 protein (Fragment). [Source:Uniprot/SPTREMBL;Acc:Q4FZS8] [ENSRNOT00000028462]		FALSE
A_44_P561563	0.0182041	0.00013916	-0.151051	-0.244386	-0.723931	-0.259028	-0.269462	TC626957	TC626957			FALSE
A_43_P10634	0.0169896	3.71789e-05	-0.322818	-0.335658	-0.980291	-1.07215	-1.29128	NM_001025123	Kdelc2	Rattus norvegicus KDEL (Lys-Asp-Glu-Leu) containing 2 (Kdelc2), mRNA [NM_001025123]	NM_001025123	FALSE
A_44_P920712	0.0294903	0.00173507	-0.0114827	-0.474375	-0.725293	0.166034	0.137961	BC099233	LOC499337	Rattus norvegicus similar to dedicator of cytokinesis 8, mRNA (cDNA clone IMAGE:7444701), complete cds. [BC099233]	BC099233	FALSE
A_44_P187408	0.0380471	0.00360854	-0.107467	-0.225821	-0.367197	0.236884	0.271353	XR_009021	RGD1307041_predicted	PREDICTED: Rattus norvegicus similar to hypothetical protein FLJ11305 (predicted) (RGD1307041_predicted), mRNA [XR_009021]	XR_009021	FALSE
A_43_P17964	0.0182041	0.000146548	0.0482037	-0.0791349	0.134565	0.677529	0.766463	NM_001007662	Arcn1	Rattus norvegicus archain 1 (Arcn1), mRNA [NM_001007662]	NM_001007662	FALSE
A_44_P1057272	0.02279	0.000724118	0.341143	-0.152662	-0.412853	0.382226	0.594276	NM_212463	Ehmt2	Rattus norvegicus euchromatic histone lysine N-methyltransferase 2 (Ehmt2), mRNA [NM_212463]	NM_212463	FALSE
A_44_P338137	0.0286568	0.00155326	-0.454708	-1.06538	-0.912897	0.212196	0.385336	NM_001033684	Cct6a	Rattus norvegicus chaperonin subunit 6a (zeta) (Cct6a), mRNA [NM_001033684]	NM_001033684	FALSE
A_44_P538334	0.0435541	0.00495929	0.0323468	0.0129201	-0.195014	-1.12801	-0.716648	NM_172224	Impa2	Rattus norvegicus inositol (myo)-1(or 4)-monophosphatase 2 (Impa2), mRNA [NM_172224]	NM_172224	FALSE
A_44_P529905	0.0430862	0.00481721	-0.147537	-0.539645	-0.724335	-0.242785	-0.0415453	XM_214614	RGD1309102_predicted	PREDICTED: Rattus norvegicus similar to TRS85 homolog (predicted) (RGD1309102_predicted), mRNA [XM_214614]	XM_214614	FALSE
A_44_P222878	0.0307485	0.0019482	-0.0458595	-0.275022	-0.362894	0.186145	0.40365	NM_001034134	Eif3s6ip	Rattus norvegicus eukaryotic translation initiation factor 3, subunit 6 interacting protein (Eif3s6ip), mRNA [NM_001034134]	NM_001034134	FALSE
A_43_P19436	0.0207852	0.000464955	-0.00751936	-0.43771	-0.523591	0.404591	0.563169	ENSRNOT00000015802	RGD1304885_predicted	PREDICTED: Rattus norvegicus similar to SH3 domain protein D19 (predicted) (RGD1304885_predicted), mRNA [XM_215597]		FALSE
A_44_P995783	0.0426998	0.00472201	-0.249872	-0.275765	-0.526156	-0.812064	-0.769233	AI411753	AI411753	AI411753 EST240047 Normalized rat placenta, Bento Soares Rattus sp. cDNA clone RPLDJ16 3' end, mRNA sequence [AI411753]	AI411753	FALSE
A_44_P566937	0.0197154	0.000318319	0.0140979	-0.32185	-0.576274	0.470944	0.496875	AA957027	AA957027	AA957027 UI-R-E1-fs-e-07-0-UI.s1 UI-R-E1 Rattus norvegicus cDNA clone UI-R-E1-fs-e-07-0-UI 3', mRNA sequence [AA957027]	AA957027	FALSE
A_44_P256973	0.0222445	0.000675311	-0.176998	-0.233266	-0.610758	-0.396195	-0.264689	NM_001014029	RGD1310316	Rattus norvegicus similar to RIKEN cDNA 2900009I07 (RGD1310316), mRNA [NM_001014029]	NM_001014029	FALSE
A_44_P328270	0.00339882	9.93468e-07	0.0466734	-0.149299	-0.972325	-1.80883	-2.01241	XM_344144	RGD1561854_predicted	PREDICTED: Rattus norvegicus similar to class II basic helix-loop-helix protein (predicted) (RGD1561854_predicted), mRNA [XM_344144]	XM_344144	FALSE
A_44_P564260	0.0204026	0.000422558	-0.0709111	-0.423649	-0.55163	0.0310222	0.142292	ENSRNOT00000004784	Fem1c_predicted	PREDICTED: Rattus norvegicus fem-1 homolog c (C.elegans) (predicted) (Fem1c_predicted), mRNA [XM_228396]		FALSE
A_44_P180294	0.0378336	0.00351452	0.435343	-0.548311	-0.630745	0.852524	0.801975	XM_344235	XM_344235	Rattus norvegicus similar to 2510002A14Rik protein (LOC364144), mRNA [XM_344235]	XM_344235	FALSE
A_44_P1030747	0.0474627	0.00597921	-0.581039	-0.499964	-0.492031	0.984866	1.0999	BC062051	Bspry	Rattus norvegicus B-box and SPRY domain containing, mRNA (cDNA clone IMAGE:5598845), partial cds [BC062051]	BC062051	FALSE
A_44_P975522	0.030513	0.00191756	-0.144488	-0.635312	-0.952116	-0.131818	-0.104623	CF108541	CF108541	Shultzomica01792 Rat lung airway and parenchyma cDNA libraries Rattus norvegicus cDNA clone Contig1460 5', mRNA sequence [CF108541]	CF108541	FALSE
A_44_P363909	0.025034	0.00095261	0.321316	-0.0415319	-0.0932006	0.541594	0.696536	ENSRNOT00000005942	Caskin2_predicted	Rattus norvegicus similar to Cask-interacting protein 2 (LOC303678), mRNA [XM_221120]		FALSE
A_44_P126261	0.018484	0.000195333	0.0199379	-0.188995	-0.804814	-1.42625	-1.19824	DV725004	DV725004	RVL17096 Wackym-Soares normalized rat vestibular cDNA library Rattus norvegicus cDNA 5', mRNA sequence [DV725004]	DV725004	FALSE
A_44_P897008	0.0360618	0.00314115	0.222777	-0.832675	-0.899259	-0.0064317	0.176942	AW141286	AW141286	AW141286 EST291327 Normalized rat brain, Bento Soares Rattus sp. cDNA clone RGIBK40 5' end similar to XRCC1 DNA repair gene, mRNA sequence [AW141286]	AW141286	FALSE
A_44_P446890	0.0427346	0.00473209	-0.111829	-0.265809	-0.830346	-0.637541	-0.651411	BI300764	BI300764	BI300764 UI-R-CV2-cij-c-07-0-UI.s1 UI-R-CV2 Rattus norvegicus cDNA clone UI-R-CV2-cij-c-07-0-UI 3', mRNA sequence [BI300764]	BI300764	FALSE
A_44_P532389	0.0400951	0.0041312	-0.532053	-0.977001	-1.23427	-0.256641	-0.177832	CF110666	CF110666	Shultzomica03917 Rat lung airway and parenchyma cDNA libraries Rattus norvegicus cDNA clone Contig3472 5', mRNA sequence [CF110666]	CF110666	FALSE
A_44_P607177	0.0207852	0.000470615	-0.230758	-0.585391	-0.696807	-0.317802	-0.155467	NM_001013907	LOC294513	Rattus norvegicus similar to DnaJ (Hsp40) homolog, subfamily B, member 12 (LOC294513), mRNA [NM_001013907]	NM_001013907	FALSE
A_43_P18974	0.0450333	0.00530561	0.493428	0.0507465	-0.038982	0.755593	0.70745	ENSRNOT00000027704	LOC309016	PREDICTED: Rattus norvegicus similar to bromodomain and WD repeat domain containing 2 (LOC309016), mRNA [XM_219377]		FALSE
A_44_P1039213	0.0227296	0.000714112	0.760521	1.43194	0.571338	-2.36142	-1.53808	NM_001013083	Cpa2_predicted	Rattus norvegicus carboxypeptidase A2 (pancreatic) (predicted) (Cpa2_predicted), mRNA [NM_001013083]	NM_001013083	FALSE
A_43_P13177	0.0300708	0.00184436	0.285135	0.0313871	0.0431548	0.431938	0.593577	NM_133409	Ilk	Rattus norvegicus integrin linked kinase (Ilk), mRNA [NM_133409]	NM_133409	FALSE
A_44_P174721	0.0407758	0.00426874	-0.570106	-0.662117	-0.955342	-0.0656909	-0.0906407	ENSRNOT00000011609	RGD1307882_predicted	similar to RIKEN cDNA 2610101N10 (predicted) (RGD1566227_predicted), mRNA [Source:RefSeq_dna;Acc:XR_007733] [ENSRNOT00000011609]		FALSE
A_44_P538602	0.018968	0.000258734	-0.150849	-0.515141	-0.486201	0.571378	0.680875	NM_021765	Copb2	Rattus norvegicus coatomer protein complex, subunit beta 2 (beta prime) (Copb2), mRNA [NM_021765]	NM_021765	FALSE
A_44_P988460	0.0320261	0.00217959	0.163025	-0.441024	-0.262331	0.639997	0.936724	AW142021	AW142021	AW142021 EST292136 Normalized rat ovary, Bento Soares Rattus sp. cDNA clone RGICT88 5' end similar to transmembrane protein wolframin, mRNA sequence [AW142021]	AW142021	FALSE
A_43_P18712	0.0412706	0.00438117	-0.0743308	-0.329085	-0.648567	-0.222964	-0.174713	NM_001014246	RGD1309482	Rattus norvegicus similar to chromosome 10 open reading frame 4; similar to putative acid phosphatase F26C11.1 (RGD1309482), mRNA [NM_001014246]	NM_001014246	FALSE
A_44_P147285	0.0268416	0.00124716	-0.606949	-0.538993	-0.19771	0.357873	1.23565	A_44_P147285	A_44_P147285			FALSE
A_44_P356596	0.0340245	0.00264545	0.165406	-0.39115	-0.0637419	0.345219	0.310168	ENSRNOT00000019780	RGD1304592_predicted	PREDICTED: Rattus norvegicus similar to KIAA0528 protein (predicted) (RGD1304592_predicted), mRNA [XM_342783]		FALSE
A_44_P246030	0.0338452	0.00255702	0.153726	-0.297125	-0.310149	1.43682	1.04994	ENSRNOT00000023607	RGD1562686_predicted			FALSE
A_44_P380392	0.020908	0.00052041	0.49109	0.0972164	-0.0615746	0.810523	1.04616	ENSRNOT00000006225	RGD1306356	PREDICTED: Rattus norvegicus similar to hypothetical protein MGC15523 (RGD1306356), mRNA [XM_221195]		FALSE
A_44_P140028	0.018045	6.41704e-05	0.254807	0.0249843	0.168074	0.896001	1.03717	NM_138886	Ick	Rattus norvegicus intestinal cell kinase (Ick), mRNA [NM_138886]	NM_138886	FALSE
A_44_P668226	0.0390191	0.00384546	0.127133	-0.0759215	0.0671874	0.620044	0.802648	NM_001007662	Arcn1	Rattus norvegicus archain 1 (Arcn1), mRNA [NM_001007662]	NM_001007662	FALSE
A_44_P499549	0.0386812	0.00375924	0.349543	0.080668	-0.00179327	0.608838	0.769633	ENSRNOT00000022862	Ppp2r5d	Ppp2r5d protein (Fragment). [Source:Uniprot/SPTREMBL;Acc:Q499R1] [ENSRNOT00000022862]		FALSE
A_43_P17140	0.0386812	0.00375928	0.235754	-0.396921	-0.641105	0.662378	0.521115	NM_001008279	Fliih	Rattus norvegicus flightless I homolog (Drosophila) (Fliih), mRNA [NM_001008279]	NM_001008279	FALSE
A_44_P287842	0.0216955	0.000570676	-0.593125	-0.33181	-0.247256	0.203715	0.890742	NM_138512	Cyp2c70	Rattus norvegicus cytochrome P450, family 2, subfamily c, polypeptide 70 (Cyp2c70), mRNA [NM_138512]	NM_138512	FALSE
A_44_P391706	0.0367868	0.00325807	0.307131	0.041033	-0.0253788	0.421836	0.653491	NM_001007796	Abcb8	Rattus norvegicus ATP-binding cassette, sub-family B (MDR/TAP), member 8 (Abcb8), mRNA [NM_001007796]	NM_001007796	FALSE
A_44_P500820	0.0435541	0.00496474	-0.00237334	-0.288613	-0.371321	0.617779	0.382632	BG666773	BG666773	BG666773 DRABWC12 Rat DRG Library Rattus norvegicus cDNA clone DRABWC12 5', mRNA sequence [BG666773]	BG666773	FALSE
A_44_P930130	0.0197154	0.000316647	0.0446707	-0.479309	-0.214173	0.48665	0.591712	DV725357	DV725357	RVL17505 Wackym-Soares normalized rat vestibular cDNA library Rattus norvegicus cDNA 5', mRNA sequence [DV725357]	DV725357	FALSE
A_44_P149896	0.0358577	0.00307971	-0.435987	1.11869	1.28581	-0.837166	-0.835739	NM_001014221	LOC363337	Rattus norvegicus similar to RIKEN cDNA 1700081O22 (LOC363337), mRNA [NM_001014221]	NM_001014221	FALSE
A_44_P898953	0.0276957	0.00139889	-0.220604	-0.488032	-0.707259	-0.144752	0.0878669	XM_574316	LOC499022	PREDICTED: Rattus norvegicus similar to quaking homolog, KH domain RNA binding isoform HQK-6 (LOC499022), mRNA [XM_574316]	XM_574316	FALSE
A_44_P496190	0.0203907	0.000403137	-0.376778	-0.662426	-0.923821	-0.145448	-0.131891	BG670537	BG670537	BG670537 DRNBCD01 Rat DRG Library Rattus norvegicus cDNA clone DRNBCD01 5', mRNA sequence [BG670537]	BG670537	FALSE
A_44_P520005	0.0363341	0.00318788	0.462767	0.420814	0.0761846	-0.237935	-0.0295764	NM_207600	Chst7	Rattus norvegicus carbohydrate (N-acetylglucosamine 6-O) sulfotransferase 7 (Chst7), mRNA [NM_207600]	NM_207600	FALSE
A_44_P321544	0.027636	0.00138728	-0.0823356	-0.482034	-0.475226	0.727783	0.762804	ENSRNOT00000011572	Slc41a2_predicted	PREDICTED: Rattus norvegicus solute carrier family 41, member 2 (predicted) (Slc41a2_predicted), mRNA [XM_343191]		FALSE
A_44_P1006988	0.0474055	0.00596293	-0.167138	-0.616857	-0.986465	-0.166614	-0.271077	ENSRNOT00000025335	LOC683524	PREDICTED: Rattus norvegicus similar to zinc finger protein 318 isoform 1 (LOC685082), mRNA [XM_001062211]		FALSE
A_44_P344777	0.0340495	0.00265023	0.391926	0.00954723	0.227229	1.23083	1.56092	XR_007820	RGD1562744_predicted	PREDICTED: Rattus norvegicus similar to Glyceraldehyde-3-phosphate dehydrogenase (GAPDH) (predicted) (RGD1562744_predicted), mRNA [XR_007820]	XR_007820	FALSE
A_44_P760260	0.0487655	0.00637156	0.0703828	0.470312	0.83567	-0.213343	0.0448095	XM_001060373	LOC682199	PREDICTED: Rattus norvegicus similar to Mucin-4 (Tracheobronchial mucin) (LOC682199), mRNA [XM_001060373]	XM_001060373	FALSE
A_43_P11497	0.028084	0.00147022	-0.224247	-0.598374	-1.24302	0.242311	-0.113711	NM_012637	Ptpn1	Rattus norvegicus protein tyrosine phosphatase, non-receptor type 1 (Ptpn1), mRNA [NM_012637]	NM_012637	FALSE
A_44_P363494	0.035254	0.0029303	-0.229915	-0.472062	-0.406954	0.20204	0.560145	XR_007323	RGD1563847_predicted	PREDICTED: Rattus norvegicus similar to karyopherin (importin) alpha 2 (predicted) (RGD1563847_predicted), mRNA [XR_007323]	XR_007323	FALSE
A_44_P511168	0.0182041	0.000113743	-0.0533924	-0.254524	-0.26747	0.461632	0.605351	BC091434	BC091434	Rattus norvegicus cDNA clone MGC:109642 IMAGE:7368024, complete cds. [BC091434]	BC091434	FALSE
A_44_P444485	0.0376531	0.00345953	-0.43736	-0.314407	-0.592545	-0.745609	-0.738441	ENSRNOT00000025653	RGD1565584_predicted	BG673264 DRNBRC09 Rat DRG Library Rattus norvegicus cDNA clone DRNBRC09 5', mRNA sequence [BG673264]		FALSE
A_44_P401284	0.0427928	0.00474688	-0.383309	-0.441734	-0.627292	0.209167	0.501553	ENSRNOT00000013344	Rnf19_predicted	PREDICTED: Rattus norvegicus ring finger protein (C3HC4 type) 19 (predicted) (Rnf19_predicted), mRNA [XM_343228]		FALSE
A_43_P10269	0.0333971	0.0024427	-0.0940438	-0.0993741	-0.0213461	-0.307352	-0.694826	NM_001025712	Itm2a	Rattus norvegicus integral membrane protein 2A (Itm2a), mRNA [NM_001025712]	NM_001025712	FALSE
A_43_P14884	0.0414968	0.00443504	-0.261175	-0.718691	-1.28411	-0.704562	-0.77936	U01914	Akap8	Rattus norvegicus AKAP95 mRNA, partial cds. [U01914]	U01914	FALSE
A_44_P424496	0.0408946	0.00431119	-0.531842	0.242834	1.06113	-0.452191	-0.322138	TC621426	TC621426			FALSE
A_43_P15668	0.0286568	0.0015543	-0.167777	-0.402294	-0.834615	-0.576759	-0.626302	ENSRNOT00000008541	Tlk2_predicted	Tlk2_predicted protein (Fragment). [Source:Uniprot/SPTREMBL;Acc:Q5RJQ5] [ENSRNOT00000008541]		FALSE
A_44_P1048487	0.0328036	0.00232519	0.145258	-0.545224	-0.530804	0.111021	0.161556	ENSRNOT00000037523	Zfyve9_predicted	PREDICTED: Rattus norvegicus zinc finger, FYVE domain containing 9 (predicted) (Zfyve9_predicted), mRNA [XM_233341]		FALSE
A_44_P990434	0.0366551	0.00322791	-0.218453	-0.49475	-0.852578	-0.760954	-0.659883	XM_215220	RGD1560964_predicted	PREDICTED: Rattus norvegicus similar to XAP-5 protein (predicted) (RGD1560964_predicted), mRNA [XM_215220]	XM_215220	FALSE
A_44_P868863	0.0317502	0.00212524	0.00434637	-0.326969	-0.524847	-0.583064	-0.490412	TC587169	TC587169			FALSE
A_44_P147702	0.0305298	0.00192308	-0.312969	-0.458422	-0.707346	0.236549	0.206564	ENSRNOT00000019044	RGD1311017_predicted	PREDICTED: Rattus norvegicus similar to multiple hat domains (predicted) (RGD1311017_predicted), mRNA [XM_340853]		FALSE
A_42_P759427	0.0271068	0.00129017	0.727779	0.305422	0.388177	1.29933	1.56253	ENSRNOT00000021976	Strn4_predicted	PREDICTED: Rattus norvegicus striatin, calmodulin binding protein 4 (predicted) (Strn4_predicted), mRNA [XM_218432]		FALSE
A_44_P717610	0.0244003	0.000893453	-0.103452	-0.681688	-0.760223	0.143472	-0.119861	TC611311	TC611311	Q8R1V1_MOUSE (Q8R1V1) Ldoc1l protein, partial (48%) [TC611311]		FALSE
A_44_P345476	0.030252	0.00187068	0.225134	-0.577892	-0.662583	1.26025	0.909308	NM_013194	Myh9	Rattus norvegicus myosin, heavy polypeptide 9, non-muscle (Myh9), mRNA [NM_013194]	NM_013194	FALSE
A_44_P971665	0.0252274	0.000970388	-0.139274	-0.725282	-1.36848	-0.467154	-0.700161	AW916050	AW916050	AW916050 EST347354 Rat gene index, normalized rat, norvegicus, Bento Soares Rattus norvegicus cDNA clone RGIDF35 5' end, mRNA sequence [AW916050]	AW916050	FALSE
A_44_P190855	0.0175623	5.54845e-05	-0.546549	-0.372089	-0.475695	-1.37006	-1.27664	AA891213	AA891213	AA891213 EST195016 Normalized rat heart, Bento Soares Rattus sp. cDNA clone RHEAQ58 3' end, mRNA sequence [AA891213]	AA891213	FALSE
A_44_P141910	0.0220906	0.000623247	0.142303	-0.0499969	-0.147621	0.734627	0.784203	NM_181388	Spg7	Rattus norvegicus spastic paraplegia 7 homolog (human) (Spg7), mRNA [NM_181388]	NM_181388	FALSE
A_43_P20639	0.0354339	0.00299943	0.312917	0.111613	-0.402821	0.121818	-0.344551	NM_001009660	Spsb2	Rattus norvegicus splA/ryanodine receptor domain and SOCS box containing 2 (Spsb2), mRNA [NM_001009660]	NM_001009660	FALSE
A_44_P107766	0.0429979	0.0047878	1.03726	0.361764	-0.130004	0.279907	-0.466682	NM_001013918	RGD1309540	Rattus norvegicus similar to hypothetical protein MGC40841; similar to hypothetical protein MGC4707 (RGD1309540), mRNA [NM_001013918]	NM_001013918	FALSE
A_43_P10230	0.0268416	0.00124811	-0.0730719	-0.444097	-0.284758	0.173489	0.641809	ENSRNOT00000001171	Slc9a6_predicted	PREDICTED: Rattus norvegicus solute carrier family 9 (sodium [XM_217630]		FALSE
A_42_P655425	0.018506	0.000234607	-0.0790534	-0.294914	-0.679656	-0.306148	-0.244391	ENSRNOT00000016863	Ppwd1_predicted	PREDICTED: Rattus norvegicus peptidylprolyl isomerase domain and WD repeat containing 1 (predicted), transcript variant 1 (Ppwd1_predicted), mRNA [XM_001056962]		FALSE
A_44_P165513	0.0399971	0.00410162	0.337052	0.0352268	-0.064014	0.534872	1.00812	NM_181088	Cip98	Rattus norvegicus CASK-interacting protein CIP98 (Cip98), mRNA [NM_181088]	NM_181088	FALSE
A_44_P591761	0.0403433	0.00419113	-0.225323	-0.777732	-1.22636	-0.428684	-0.455168	TC598769	TC598769			FALSE
A_44_P236761	0.0158102	1.9686e-05	-0.262554	0.0522151	-0.483904	-0.618555	-0.822478	ENSRNOT00000008136	RGD1309019_predicted	similar to peptidoglycan recognition protein 2 (LOC691298), mRNA [Source:RefSeq_dna;Acc:XR_007056] [ENSRNOT00000008136]		FALSE
A_44_P849067	0.0314978	0.0020976	-0.126467	-0.412155	-0.676622	-0.128257	-0.0714946	NM_001008299	Rnmt	Rattus norvegicus RNA (guanine-7-) methyltransferase (Rnmt), mRNA [NM_001008299]	NM_001008299	FALSE
A_44_P520840	0.0271376	0.0013075	0.677781	0.0986771	0.411202	1.47587	1.67264	ENSRNOT00000012114	ENSRNOT00000012114	PREDICTED: Rattus norvegicus similar to Programmed cell death 6 interacting protein (ALG-2 interacting protein X) (predicted) (RGD1561176_predicted), mRNA [XM_343494]		FALSE
A_43_P22858	0.0334744	0.00245428	-0.0383433	-0.208078	-0.525288	-0.379892	-0.319975	XM_001058483	LOC681234	PREDICTED: Rattus norvegicus similar to debranching enzyme homolog 1, transcript variant 2 (LOC681234), mRNA [XM_001058483]	XM_001058483	FALSE
A_44_P390536	0.0270584	0.00127296	-0.0941515	-0.206121	-0.256989	-0.83776	-1.0234	AI178151	AI178151	AI178151 EST221816 Normalized rat placenta, Bento Soares Rattus sp. cDNA clone RPLCM85 3' end, mRNA sequence [AI178151]	AI178151	FALSE
A_44_P990532	0.0375279	0.00342925	-0.12613	-0.390484	-0.462632	0.413037	0.558188	ENSRNOT00000018185	ENSRNOT00000018185	Ddx17 protein. [Source:Uniprot/SPTREMBL;Acc:Q568Z8] [ENSRNOT00000018185]		FALSE
A_44_P818671	0.025034	0.000948045	-0.149371	-0.678398	-1.27319	0.239998	0.199659	AW918229	AW918229	AW918229 EST349533 Rat gene index, normalized rat, norvegicus, Bento Soares Rattus norvegicus cDNA clone RGIEO12 5' end, mRNA sequence [AW918229]	AW918229	FALSE
A_44_P528706	0.0206599	0.00045749	-0.278038	-0.677063	-0.808093	0.0954102	0.170816	AW141558	AW141558	AW141558 EST291617 Normalized rat embryo, Bento Soares Rattus sp. cDNA clone RGIBZ29 5' end similar to H.sapiens hypothetical protein KIAA0648, mRNA sequence [AW141558]	AW141558	FALSE
A_44_P410341	0.0256092	0.00102696	-0.0812262	-0.326037	-0.351192	0.0413344	0.265776	ENSRNOT00000021850	Ipp_predicted	PREDICTED: Rattus norvegicus IAP promoted placental gene (predicted) (Ipp_predicted), mRNA [XM_233415]		FALSE
A_44_P112061	0.0318839	0.00214817	0.306598	-0.213039	-0.712174	0.371669	0.327925	ENSRNOT00000046359	RGD1308331_predicted	PREDICTED: Rattus norvegicus similar to Trithorax homolog 2 (Mixed lineage leukemia gene homolog 2 protein) (predicted) (RGD1308331_predicted), mRNA [XR_009278]		FALSE
A_44_P108108	0.0309922	0.00199741	-0.380295	-0.581514	-0.826711	-0.305064	-0.099418	ENSRNOT00000002173	Usp16	Usp16 protein (Fragment). [Source:Uniprot/SPTREMBL;Acc:Q2KJ09] [ENSRNOT00000002173]		FALSE
A_44_P264988	0.0325197	0.00229556	0.341794	-0.42262	-0.744763	0.41275	0.544814	ENSRNOT00000016784	Trio	Rattus norvegicus similar to Triple functional domain protein (PTPRF interacting protein) (LOC310192), mRNA [XM_226888]		FALSE
A_44_P433157	0.0221841	0.000645071	0.0790912	-0.449327	-0.544959	0.902262	0.854116	NM_031745	Rsn	Rattus norvegicus restin (Reed-Steinberg cell-expressed intermediate filament-associated protein) (Rsn), mRNA [NM_031745]	NM_031745	FALSE
A_42_P495428	0.0309922	0.00199492	-0.237713	0.0143999	-0.118805	0.85559	0.955473	NM_001013983	RGD1307736	Rattus norvegicus similar to Hypothetical protein KIAA0152 (RGD1307736), mRNA [NM_001013983]	NM_001013983	FALSE
A_44_P1015839	0.0330642	0.00238014	-0.000842094	0.152539	-0.209261	-0.4955	-0.718679	BC133066	RGD1563440_predicted	Rattus norvegicus similar to hypothetical protein (predicted), mRNA (cDNA clone MGC:156808 IMAGE:7134332), complete cds [BC133066]	BC133066	FALSE
A_44_P190294	0.0233809	0.000793906	0.186317	0.382834	-0.239194	-1.10527	-0.58254	BE099508	BE099508	BE099508 UI-R-BJ1-atj-b-10-0-UI.s1 UI-R-BJ1 Rattus norvegicus cDNA clone UI-R-BJ1-atj-b-10-0-UI 3', mRNA sequence [BE099508]	BE099508	FALSE
A_44_P468728	0.000856589	8.34598e-08	1.1049	1.31029	-0.110534	-1.64782	-1.47765	NM_001014146	RGD1308114	Rattus norvegicus similar to cDNA sequence AF397014 (RGD1308114), mRNA [NM_001014146]	NM_001014146	FALSE
A_44_P138800	0.0222025	0.000658639	-0.680966	-0.934248	-1.41283	-0.33501	-0.268861	XM_224672	RGD1304626_predicted	PREDICTED: Rattus norvegicus similar to KIAA1128 protein (predicted) (RGD1304626_predicted), mRNA [XM_224672]	XM_224672	FALSE
A_42_P673119	0.0378336	0.00350931	-0.121571	-0.552011	-1.01554	-0.524326	-0.528929	ENSRNOT00000013387	ENSRNOT00000013387	BF556273 UI-R-A1-em-d-07-0-UI.r1 UI-R-A1 Rattus norvegicus cDNA clone UI-R-A1-em-d-07-0-UI 5', mRNA sequence [BF556273]		FALSE
A_42_P552807	0.0338452	0.00256079	0.221446	-0.0911728	-0.00579011	0.844967	0.923201	ENSRNOT00000056330	Hcfc1_predicted	PREDICTED: Rattus norvegicus host cell factor C1 (predicted) (Hcfc1_predicted), mRNA [XM_001057067]		FALSE
A_44_P435494	0.030805	0.00196101	-0.167233	-0.581373	-1.04821	-0.377763	-0.509902	XM_346914	LOC360760	PREDICTED: Rattus norvegicus similar to PABP-dependent poly(A) nuclease 3 (LOC360760), mRNA [XM_346914]	XM_346914	FALSE
A_44_P456852	0.0175623	5.45812e-05	-0.322818	-0.796204	-0.886146	0.0939103	0.211415	NM_053414	Ddx1	Rattus norvegicus DEAD (Asp-Glu-Ala-Asp) box polypeptide 1 (Ddx1), mRNA [NM_053414]	NM_053414	FALSE
A_42_P740386	0.0311953	0.00203497	0.0959609	-0.179695	-0.280744	0.453937	0.4845	NM_001012110	Zfp513	Rattus norvegicus zinc finger protein 513 (Zfp513), mRNA [NM_001012110]	NM_001012110	FALSE
A_44_P487355	0.0342163	0.00268398	-0.139074	-0.540138	-0.827781	-0.0417713	0.111272	NM_001012030	Zfp281	Rattus norvegicus zinc finger protein 281 (Zfp281), mRNA [NM_001012030]	NM_001012030	FALSE
A_43_P15866	0.0466343	0.00575232	0.0796572	-0.221563	-0.257909	0.730184	0.756023	ENSRNOT00000021419	Ap1g1	Gamma-adaptin (Fragment). [Source:Uniprot/SPTREMBL;Acc:Q8R525] [ENSRNOT00000021419]		FALSE
A_44_P301805	0.0169258	2.90235e-05	-0.388624	-0.452485	-0.485794	0.165556	0.483697	NM_080402	Ryk	Rattus norvegicus receptor-like tyrosine kinase (Ryk), mRNA [NM_080402]	NM_080402	FALSE
A_44_P612314	0.0256092	0.0010289	-0.897428	-0.618743	-0.680131	-1.42089	-1.4872	A_44_P612314	A_44_P612314			FALSE
A_44_P249617	0.0370817	0.00333116	-0.00363147	-0.653548	-1.03834	-0.18492	-0.0621968	AI008007	AI008007	AI008007 EST202458 Normalized rat embryo, Bento Soares Rattus sp. cDNA clone REMAI32 3' end, mRNA sequence [AI008007]	AI008007	FALSE
A_44_P393580	0.0427676	0.00473783	0.188817	-0.0667246	-0.113311	0.974032	0.670985	NM_017249	Mbc2	Rattus norvegicus membrane bound C2 domain containing protein (Mbc2), mRNA [NM_017249]	NM_017249	FALSE
A_44_P558048	0.0353213	0.00295448	-0.314919	-0.692638	-0.718351	0.591379	0.461639	NM_001033897	RGD1309387	Rattus norvegicus similar to cDNA sequence AF155546 (RGD1309387), mRNA [NM_001033897]	NM_001033897	FALSE
A_44_P255341	0.0266999	0.00122268	0.121967	0.0809858	-0.134218	0.815858	0.807962	ENSRNOT00000011105	Ipo9_predicted	Rattus norvegicus similar to importin 9 (LOC304817), mRNA [XM_222661]		FALSE
A_43_P10163	0.0383243	0.00365563	0.139136	-0.145845	-0.14082	0.547827	0.742211	NM_001013170	Wars	Rattus norvegicus tryptophanyl-tRNA synthetase (Wars), mRNA [NM_001013170]	NM_001013170	FALSE
A_44_P1050728	0.0196408	0.000297515	-0.134426	-0.406773	-0.723665	-0.118054	-0.0454665	XM_231361	LOC312030	Rattus norvegicus similar to splicing factor, arginine/serine-rich 2, interacting protein; SC35-interacting protein 1 (LOC312030), mRNA [XM_231361]	XM_231361	FALSE
A_43_P16725	0.0444375	0.00516313	-0.138631	-0.311533	-0.44157	0.10934	0.194854	NM_001009638	RGD1311805	Rattus norvegicus similar to RIKEN cDNA 2400010D15 (RGD1311805), mRNA [NM_001009638]	NM_001009638	FALSE
A_44_P205479	0.0338452	0.00258571	-0.176406	-0.231692	-0.496219	-0.421942	-0.510791	ENSRNOT00000019258	Pdcd7_predicted	PREDICTED: Rattus norvegicus programmed cell death protein 7 (predicted) (Pdcd7_predicted), mRNA [XM_343413]		FALSE
A_44_P589702	0.0395407	0.00401294	-0.151616	-0.65897	-0.749712	-0.131253	0.0820912	XM_227870	Clcn6_predicted	PREDICTED: Rattus norvegicus chloride channel 6 (predicted) (Clcn6_predicted), mRNA [XM_227870]	XM_227870	FALSE
A_44_P538789	0.025034	0.000957001	0.546425	-0.0545612	0.221791	1.16928	1.53081	XR_005884	LOC289157	PREDICTED: Rattus norvegicus similar to Glyceraldehyde-3-phosphate dehydrogenase (GAPDH) (LOC289157), mRNA [XR_005884]	XR_005884	FALSE
A_44_P358627	0.0424626	0.0046555	0.31095	-0.484786	-0.924976	0.209377	0.069081	ENSRNOT00000055831	ENSRNOT00000055831	Rattus norvegicus similar to Chromodomain-helicase-DNA-binding protein 2 (CHD-2) (LOC308738), mRNA [XM_218790]		FALSE
A_44_P160644	0.0475632	0.00604144	-0.560098	-0.168324	-0.403994	-0.98183	-1.35989	AI008958	AI008958	AI008958 EST203409 Normalized rat embryo, Bento Soares Rattus sp. cDNA clone REMBG08 3' end, mRNA sequence [AI008958]	AI008958	FALSE
A_44_P354806	0.0211314	0.000534632	-0.0433611	-0.40038	-0.378317	0.688665	1.02305	NM_172072	Vps45	Rattus norvegicus vacuolar protein sorting 45 (yeast) (Vps45), mRNA [NM_172072]	NM_172072	FALSE
A_44_P337691	0.0378833	0.00356103	-0.0893787	-0.589861	-0.6273	0.413232	0.50083	ENSRNOT00000018489	Mfsd1_predicted	Rattus norvegicus similar to RIKEN cDNA 1200003O06 (LOC361957), mRNA [XM_342258]		FALSE
A_44_P838603	0.0375279	0.00343157	0.0972472	0.0536303	0.313869	0.943175	1.43221	DV714996	DV714996	RVL4498 Wackym-Soares normalized rat vestibular cDNA library Rattus norvegicus cDNA 5', mRNA sequence [DV714996]	DV714996	FALSE
A_43_P19546	0.0373283	0.00338422	0.402534	-0.482216	-1.30428	0.357901	0.0384215	ENSRNOT00000015467	ENSRNOT00000015467	PREDICTED: Rattus norvegicus similar to KIAA0853 protein (predicted) (RGD1307729_predicted), mRNA [XM_224295]		FALSE
A_44_P982706	0.0310217	0.00200695	0.0778816	0.189144	0.251453	-0.178864	-0.182219	A_44_P982706	A_44_P982706			FALSE
A_44_P929254	0.0216274	0.000561573	0.533832	0.0101287	0.328307	1.13609	1.41857	A_44_P929254	A_44_P929254			FALSE
A_44_P369617	0.0235005	0.000803692	-1.0809	-0.587502	-0.891817	-2.00612	-2.41175	AA945152	AA945152	AA945152 EST200651 Normalized rat liver, Bento Soares Rattus sp. cDNA clone RLIAH24 3' end, mRNA sequence [AA945152]	AA945152	FALSE
A_43_P21509	0.0451094	0.00532632	0.489308	0.155574	0.0201133	0.737192	0.821771	ENSRNOT00000048026	Rnasen	Ribonuclease III-like protein (Fragment). [Source:Uniprot/SPTREMBL;Acc:Q67B98] [ENSRNOT00000048026]		FALSE
A_44_P365879	0.020652	0.000441253	-0.311196	-0.574009	-0.503597	0.195462	0.390921	XM_230467	XM_230467	Rattus norvegicus similar to hypothetical protein FLJ10579 (LOC311328), mRNA [XM_230467]	XM_230467	FALSE
A_44_P369144	0.0355924	0.00303921	-0.0271655	-0.208083	-0.315975	0.28	0.391871	AW916097	AW916097	AW916097 EST347401 Rat gene index, normalized rat, norvegicus, Bento Soares Rattus norvegicus cDNA clone RGIDF95 5' end, mRNA sequence [AW916097]	AW916097	FALSE
A_44_P366803	0.0196408	0.000305282	-1.10551	-0.656912	-1.01296	-2.56457	-2.91593	BF282429	BF282429	BF282429 EST446932 Rat Gene Index, normalized rat, Rattus norvegicus cDNA Rattus norvegicus cDNA clone RGIDM44 3' sequence, mRNA sequence [BF282429]	BF282429	FALSE
A_44_P223899	0.0354309	0.00298977	0.229182	-0.0703909	-0.0905032	0.623862	0.886897	AW143174	AW143174	AW143174 EST293470 Normalized rat brain, Bento Soares Rattus sp. cDNA clone RGIBE94 5' end, mRNA sequence [AW143174]	AW143174	FALSE
A_44_P454927	0.0442965	0.00513448	0.452762	1.28708	1.48817	-0.0318298	-0.0463058	XM_228184	XM_228184	Rattus norvegicus similar to double homeobox, 4; double homeobox protein 4 (LOC309796), mRNA [XM_228184]	XM_228184	FALSE
A_44_P148560	0.025034	0.000950124	-0.269837	-0.929885	-1.08865	-0.179714	-0.143869	AW143690	AW143690	AW143690 EST293986 Normalized rat embryo, Bento Soares Rattus sp. cDNA clone RGIBY11 5' end, mRNA sequence [AW143690]	AW143690	FALSE
A_44_P895402	0.018484	0.000215962	-0.164192	-0.622436	-0.948358	0.0670329	-0.0684811	AW916198	AW916198	AW916198 EST347502 Rat gene index, normalized rat, norvegicus, Bento Soares Rattus norvegicus cDNA clone RGIDJ30 5' end, mRNA sequence [AW916198]	AW916198	FALSE
A_44_P697615	0.0392407	0.00391317	-0.161317	-0.538546	-0.813815	-0.0390302	0.159061	AW917911	AW917911	AW917911 EST349215 Rat gene index, normalized rat, norvegicus, Bento Soares Rattus norvegicus cDNA clone RGIEK03 5' end, mRNA sequence [AW917911]	AW917911	FALSE
A_44_P222004	0.0434603	0.00490138	0.330931	0.263007	-0.159925	-0.539796	-0.514948	NM_013129	Il15	Rattus norvegicus interleukin 15 (Il15), mRNA [NM_013129]	NM_013129	FALSE
A_44_P442873	0.0272411	0.00131663	-0.269231	-0.424372	-0.475333	-0.0379707	0.115667	NM_053739	Becn1	Rattus norvegicus beclin 1 (coiled-coil, myosin-like BCL2-interacting protein) (Becn1), transcript variant 1, mRNA [NM_053739]	NM_053739	FALSE
A_44_P232030	0.0342343	0.00269321	0.854454	0.0757923	-0.0323616	0.707674	0.670461	XM_001066983	LOC297826	PREDICTED: Rattus norvegicus similar to Alpha-enolase (2-phospho-D-glycerate hydro-lyase) (Non-neural enolase) (NNE) (Enolase 1) (LOC297826), mRNA [XM_001066983]	XM_001066983	FALSE
A_42_P516535	0.0334432	0.00244873	0.280962	0.634083	0.813222	-0.063074	-0.141287	ENSRNOT00000012375	Noxa1_predicted	PREDICTED: Rattus norvegicus NADPH oxidase activator 1 (predicted) (Noxa1_predicted), mRNA [XM_231042]		FALSE
A_44_P517686	0.0263791	0.00117543	-0.3406	-0.447881	-0.380491	0.107294	0.408746	NM_212519	Tomm70a	Rattus norvegicus translocase of outer mitochondrial membrane 70 homolog A (yeast) (Tomm70a), mRNA [NM_212519]	NM_212519	FALSE
A_43_P20631	0.0231147	0.000754472	0.530883	0.28829	-0.307795	-0.122463	0.00504088	ENSRNOT00000001401	RGD1307973_predicted	PREDICTED: Rattus norvegicus similar to 2900002H16Rik protein (predicted) (RGD1307973_predicted), mRNA [XM_222150]		FALSE
A_44_P1005536	0.0486422	0.00634047	0.456687	-0.0928775	-0.477075	0.464259	0.568092	ENSRNOT00000015730	L3mbtl3_predicted	PREDICTED: Rattus norvegicus l(3)mbt-like 3 (Drosophila) (predicted) (L3mbtl3_predicted), mRNA [XM_220113]		FALSE
A_44_P311945	0.0333144	0.00242632	-0.138149	-0.355334	-0.609815	0.116793	0.0464977	ENSRNOT00000013471	RGD1310351_predicted	PREDICTED: Rattus norvegicus similar to RIKEN cDNA 4732418C07 (predicted) (RGD1310351_predicted), mRNA [XM_216499]		FALSE
A_44_P421539	0.0187873	0.000249519	-0.234484	-0.525941	-0.698887	0.319603	0.306002	NM_053295	Cast	Rattus norvegicus calpastatin (Cast), transcript variant 1, mRNA [NM_053295]	NM_053295	FALSE
A_44_P1014383	0.0451144	0.00533188	-0.54597	-0.688637	-0.875105	0.18212	0.0733252	NM_001014097	LOC315970	Rattus norvegicus similar to CDV-3B (LOC315970), mRNA [NM_001014097]	NM_001014097	FALSE
A_43_P16820	0.0448814	0.00526416	0.25482	0.0830665	0.176696	0.636835	0.66096	ENSRNOT00000025071	Sox4_predicted	PREDICTED: Rattus norvegicus SRY-box containing gene 4 (predicted) (Sox4_predicted), mRNA [XM_344594]		FALSE
A_44_P370500	0.0271376	0.00130736	0.0782306	-0.127836	-0.0261576	0.441625	0.647743	NM_001013101	Moap1	Rattus norvegicus modulator of apoptosis 1 (Moap1), mRNA [NM_001013101]	NM_001013101	FALSE
A_44_P403316	0.0182041	0.000119822	0.149212	-0.547163	-0.611388	0.517706	0.936137	ENSRNOT00000032636	RGD1308616_predicted	PREDICTED: Rattus norvegicus similar to KIAA0467 protein (predicted) (RGD1308616_predicted), mRNA [XM_342892]		FALSE
A_44_P253422	0.0386656	0.00373887	0.0126914	-0.1316	-0.376411	0.312232	0.485872	XM_217099	LOC300472	PREDICTED: Rattus norvegicus similar to Vacuolar protein sorting 26 homolog (VPS26 protein homolog) (LOC300472), mRNA [XM_217099]	XM_217099	FALSE
A_43_P16915	0.0475632	0.00602856	-0.239391	-0.539796	-0.682894	-0.0737168	-0.0067488	XR_006668	LOC310649	PREDICTED: Rattus norvegicus similar to Zinc finger CCCH-type domain-containing protein 11A (LOC310649), mRNA [XR_006668]	XR_006668	FALSE
A_44_P1025952	0.035254	0.00292416	-0.255089	-0.683844	-1.07721	-0.126984	-0.270359	XR_009008	RGD1307390_predicted	PREDICTED: Rattus norvegicus similar to BC282485_1 (predicted) (RGD1307390_predicted), mRNA [XR_009008]	XR_009008	FALSE
A_43_P13221	0.0274974	0.00135341	-0.276664	-0.226434	-0.256712	0.172168	0.181603	NM_133589	Ppp6c	Rattus norvegicus protein phosphatase 6, catalytic subunit (Ppp6c), mRNA [NM_133589]	NM_133589	FALSE
A_44_P420957	0.0299969	0.00180902	-0.00534642	-0.213651	-0.336328	0.185752	0.25265	AW915587	AW915587	AW915587 EST346891 Normalized rat embryo, Bento Soares Rattus sp. cDNA clone RGICY09 5' end, mRNA sequence [AW915587]	AW915587	FALSE
A_44_P305694	0.0279908	0.00145507	-0.483758	-0.271551	-0.395301	-1.06104	-1.16428	AI412156	AI412156	AI412156 EST240450 Normalized rat kidney, Bento Soares Rattus sp. cDNA clone RKIEG83 3' end, mRNA sequence [AI412156]	AI412156	FALSE
A_44_P137978	0.035425	0.00298041	-0.141902	-0.168549	-0.437572	0.398309	0.562967	ENSRNOT00000017291	ENSRNOT00000017291	PREDICTED: Rattus norvegicus similar to Retinoblastoma-binding protein 8 (RBBP-8) (CtBP interacting protein) (CtIP) (Retinoblastoma-interacting protein and myosin-like) (RIM) (predicted) (RGD1308872_predicted), mRNA [XM_214620]		FALSE
A_44_P713567	0.0346345	0.00280086	-0.00971603	-0.456711	-0.87483	0.313425	-0.035418	ENSRNOT00000030501	LOC687994	PREDICTED: Rattus norvegicus similar to 82-kD FMRP Interacting Protein (LOC687994), mRNA [XM_001080810]		FALSE
A_44_P127156	0.0452502	0.0053766	0.222607	-0.167739	-0.645791	0.0865973	0.0261618	M55017	M55017	RATNUCIA2 Rat nucleolin gene [M55017]	M55017	FALSE
A_44_P1048140	0.0338452	0.00254348	-0.245697	-0.290237	-0.309563	0.378955	0.44985	AI072036	AI072036	AI072036 UI-R-C2-nd-g-01-0-UI.s1 UI-R-C2 Rattus norvegicus cDNA clone UI-R-C2-nd-g-01-0-UI 3', mRNA sequence [AI072036]	AI072036	FALSE
A_44_P1037217	0.020908	0.000511554	-0.435729	-0.921713	-1.08276	0.085281	0.0836755	ENSRNOT00000003832	RGD1565486_predicted	Rattus norvegicus similar to RIKEN cDNA 2610015J01 (LOC302931), mRNA [XM_220157]		FALSE
A_44_P296561	0.0208809	0.000491353	-0.0791208	-0.396227	-0.798775	-0.416328	-0.177871	BG668164	BG668164	BG668164 DRABYC02 Rat DRG Library Rattus norvegicus cDNA clone DRABYC02 5', mRNA sequence [BG668164]	BG668164	FALSE
A_44_P311985	0.0369859	0.00330285	0.060606	0.30274	0.0587879	-0.627784	-0.475338	XR_005783	LOC500680	PREDICTED: Rattus norvegicus similar to H3 histone, family 3B (LOC500680), mRNA [XR_005783]	XR_005783	FALSE
A_42_P812008	0.0244319	0.000899815	0.600657	0.401091	-0.117444	-1.50597	-1.82408	NM_053611	Nupr1	Rattus norvegicus nuclear protein 1 (Nupr1), mRNA [NM_053611]	NM_053611	FALSE
A_44_P973613	0.0408417	0.00430363	-0.349909	-0.850402	-1.07119	0.0043838	0.157895	BF558764	BF558764	BF558764 UI-R-A1-ds-h-03-0-UI.r1 UI-R-A1 Rattus norvegicus cDNA clone UI-R-A1-ds-h-03-0-UI 5', mRNA sequence [BF558764]	BF558764	FALSE
A_44_P391068	0.000144645	7.04655e-09	-1.6668	-1.44855	0.78668	3.34866	4.26933	NM_020540	Gstm4	Rattus norvegicus glutathione S-transferase M4 (Gstm4), mRNA [NM_020540]	NM_020540	FALSE
A_44_P467108	0.0278556	0.00142334	0.643802	0.300949	0.532197	0.277066	0.145203	BF393108	BF393108	BF393108 UI-R-CA0-bgu-g-04-0-UI.s1 UI-R-CA0 Rattus norvegicus cDNA clone UI-R-CA0-bgu-g-04-0-UI 3', mRNA sequence [BF393108]	BF393108	FALSE
A_44_P1003969	0.0175623	5.56122e-05	-0.14499	-0.408149	-0.703188	-0.132962	-0.1728	XM_573529	RGD1565589_predicted	PREDICTED: Rattus norvegicus similar to myocardial ischemic preconditioning upregulated protein 2 (predicted) (RGD1565589_predicted), mRNA [XM_573529]	XM_573529	FALSE
A_44_P393929	0.0478172	0.00610323	0.455715	0.192495	0.133564	0.726632	0.840237	NM_001039713	RGD1305121_predicted	Rattus norvegicus similar to FTO (predicted) (RGD1305121_predicted), mRNA [NM_001039713]	NM_001039713	FALSE
A_44_P355657	0.0364355	0.00320211	0.353348	-0.103524	-0.383427	0.944377	0.719147	NM_022301	Pik4ca	Rattus norvegicus phosphatidylinositol 4-kinase, catalytic, alpha polypeptide (Pik4ca), mRNA [NM_022301]	NM_022301	FALSE
A_44_P115913	0.0421373	0.00456766	-0.16789	0.0365555	-0.329889	-0.801542	-1.00355	AI231301	AI231301	AI231301 EST227989 Normalized rat embryo, Bento Soares Rattus sp. cDNA clone REMDI35 3' end, mRNA sequence [AI231301]	AI231301	FALSE
A_44_P511184	0.0321276	0.00218963	-0.365129	-0.798564	-0.951284	-0.238261	-0.193224	XM_342143	RGD1560358_predicted	PREDICTED: Rattus norvegicus similar to cell division cycle and apoptosis regulator 1 (predicted) (RGD1560358_predicted), mRNA [XM_342143]	XM_342143	FALSE
A_43_P17945	0.0222445	0.000677294	0.0705714	-0.0877235	-0.651702	-1.75165	-1.47595	NM_001014006	F12	Rattus norvegicus coagulation factor XII (Hageman factor) (F12), mRNA [NM_001014006]	NM_001014006	FALSE
A_44_P142242	0.0307485	0.00194985	-0.417392	-0.646672	-0.714483	-0.211748	0.0228177	NM_031334	Cdh1	Rattus norvegicus cadherin 1 (Cdh1), mRNA [NM_031334]	NM_031334	FALSE
A_44_P346318	0.0220906	0.000623754	0.260198	0.107088	0.123877	0.542535	0.770611	ENSRNOT00000046155	RGD1309054_predicted	PREDICTED: Rattus norvegicus similar to FKSG26 protein (predicted) (RGD1309054_predicted), mRNA [XM_214707]		FALSE
A_44_P376545	0.0484148	0.00626799	-0.599817	-0.331384	-0.441122	-1.16844	-1.09938	AI136203	AI136203	AI136203 UI-R-C2p-ns-f-05-0-UI.s1 UI-R-C2p Rattus norvegicus cDNA clone UI-R-C2p-ns-f-05-0-UI 3', mRNA sequence [AI136203]	AI136203	FALSE
A_44_P637281	0.0497332	0.00657795	-0.0523225	-0.0881152	-0.176241	-0.540554	-0.449407	TC592282	TC592282	Q7TQ12_RAT (Q7TQ12) Aa1114, partial (9%) [TC592282]		FALSE
A_42_P801379	0.0207852	0.000480776	-0.0691401	-0.241316	-0.608431	-1.02718	-0.848451	NM_199114	Fgfrl1	Rattus norvegicus fibroblast growth factor receptor-like 1 (Fgfrl1), mRNA [NM_199114]	NM_199114	FALSE
A_44_P688801	0.0329963	0.00234602	-0.22165	-0.496719	-0.483502	0.360162	0.108237	TC599239	TC599239			FALSE
A_44_P684932	0.0294903	0.00172073	-0.133054	-0.328559	-1.00068	-0.704829	-0.771418	TC603546	TC603546	Q7TQ12_RAT (Q7TQ12) Aa1114, partial (9%) [TC603546]		FALSE
A_44_P999630	0.0300099	0.00181866	-0.145316	-0.383656	-0.557351	0.205142	0.23136	NM_001024744	Cdc16	Rattus norvegicus CDC16 cell division cycle 16 homolog (S. cerevisiae) (Cdc16), mRNA [NM_001024744]	NM_001024744	FALSE
A_44_P525392	0.020908	0.000521503	-0.445346	-0.764407	-0.913212	0.604274	0.411233	ENSRNOT00000014832	Nup205_predicted	PREDICTED: Rattus norvegicus nucleoporin 205kDa (predicted) (Nup205_predicted), mRNA [XM_342657]		FALSE
A_44_P1036480	0.0384568	0.00369449	0.0451081	-0.607512	-1.01047	0.418754	0.164117	ENSRNOT00000004513	ENSRNOT00000004513	similar to HBxAg transactivated protein 2 (LOC691387), mRNA [Source:RefSeq_dna;Acc:XR_007088] [ENSRNOT00000004513]		FALSE
A_44_P323591	0.0465606	0.00571376	-0.292307	-0.693433	-0.850227	-0.04502	-0.0181412	ENSRNOT00000023741	Sh2bp1	Sh2bp1 protein (Fragment). [Source:Uniprot/SPTREMBL;Acc:Q32PZ5] [ENSRNOT00000023741]		FALSE
A_44_P106615	0.0389079	0.00382379	0.144762	-0.202433	-0.662973	0.370763	0.613854	AW144209	AW144209	AW144209 EST294505 Normalized rat ovary, Bento Soares Rattus sp. cDNA clone RGICL27 5' end, mRNA sequence [AW144209]	AW144209	FALSE
A_44_P328283	0.0340245	0.00264276	0.191568	-0.0354533	-0.171675	0.697247	0.699479	XM_219706	RGD1566323_predicted	PREDICTED: Rattus norvegicus similar to mKIAA1018 protein (predicted) (RGD1566323_predicted), mRNA [XM_219706]	XM_219706	FALSE
A_44_P690194	0.0221943	0.000649815	-0.0364202	-0.204609	-0.304038	0.344516	0.488622	BG664107	BG664107	DRAADD04 Rat DRG Library Rattus norvegicus cDNA clone DRAADD04 5', mRNA sequence [BG664107]	BG664107	FALSE
A_42_P814410	0.0497411	0.00660199	0.614382	0.326685	0.0176159	0.269914	0.582204	NM_212500	Gnl1	Rattus norvegicus guanine nucleotide binding protein-like 1 (Gnl1), mRNA [NM_212500]	NM_212500	FALSE
A_44_P193195	0.0203907	0.000380214	-0.159989	-0.527071	-0.512775	0.602506	0.768474	XM_222152	Sbno1	PREDICTED: Rattus norvegicus sno, strawberry notch homolog 1 (Drosophila) (Sbno1), mRNA [XM_222152]	XM_222152	FALSE
A_44_P852833	0.0271229	0.00129226	0.154398	-0.0770488	-0.110433	0.311819	0.816312	NM_001039607	LOC294154	Rattus norvegicus similar to chromosome 6 open reading frame 106 isoform a (LOC294154), mRNA [NM_001039607]	NM_001039607	FALSE
A_42_P843692	0.0427225	0.00472868	-0.0827903	0.586602	0.0394081	-2.85315	-2.68332	NM_013219	Cadps	Rattus norvegicus Ca2+-dependent secretion activator (Cadps), mRNA [NM_013219]	NM_013219	FALSE
A_44_P319236	0.0293312	0.00170301	0.15274	-0.391903	-0.706807	0.294527	0.382898	XM_343446	Syncrip	Rattus norvegicus similar to Nsap1-pending protein (LOC363113), mRNA [XM_343446]	XM_343446	FALSE
A_42_P710166	0.031927	0.00215262	-0.168323	-0.525681	-0.705465	0.310158	0.512682	ENSRNOT00000039677	Ppfia1_predicted	PREDICTED: Rattus norvegicus protein tyrosine phosphatase, receptor type, f polypeptide (PTPRF), interacting protein, alpha 1 (predicted) (Ppfia1_predicted), mRNA [XM_238162]		FALSE
A_44_P741206	0.0206599	0.000453556	-0.448479	0.188647	-0.128627	-1.14414	-1.04726	BM390774	BM390774	BM390774 UI-R-CN1-cjr-p-01-0-UI.s1 UI-R-CN1 Rattus norvegicus cDNA clone UI-R-CN1-cjr-p-01-0-UI 3', mRNA sequence [BM390774]	BM390774	FALSE
A_44_P226601	0.0459924	0.005558	0.00238824	-0.876537	-1.49983	-0.0194504	-0.0410213	NM_183331	F8	Rattus norvegicus coagulation factor VIII (F8), mRNA [NM_183331]	NM_183331	FALSE
A_44_P551275	0.0350925	0.00287551	-0.479369	-1.16778	-1.64537	-0.389552	-0.386976	ENSRNOT00000059624	ENSRNOT00000059624	Eif5b protein (Fragment). [Source:Uniprot/SPTREMBL;Acc:Q4FZQ8] [ENSRNOT00000059624]		FALSE
A_44_P429781	0.0242899	0.00086946	-0.0389224	-0.268641	-0.492768	-0.286442	-0.115195	NM_133324	Mak10	Rattus norvegicus MAK10 homolog, amino-acid N-acetyltransferase subunit, (S. cerevisiae) (Mak10), mRNA [NM_133324]	NM_133324	FALSE
A_44_P260502	0.0434906	0.0049281	0.889818	0.17682	0.355432	1.07809	1.28645	XR_006443	LOC296875	PREDICTED: Rattus norvegicus similar to Alpha-enolase (2-phospho-D-glycerate hydro-lyase) (Non-neural enolase) (NNE) (Enolase 1) (LOC296875), mRNA [XR_006443]	XR_006443	FALSE
A_44_P680263	0.0385407	0.00370443	-0.115606	0.103893	-0.0694047	-0.863497	-0.80063	AW916515	AW916515	AW916515 EST347819 Rat gene index, normalized rat, norvegicus, Bento Soares Rattus norvegicus cDNA clone RGIDR21 5' end, mRNA sequence [AW916515]	AW916515	FALSE
A_44_P959960	0.018484	0.000213537	-0.137226	-0.398605	-0.469646	0.570171	0.593902	CF108188	LOC691031	Shultzomica01439 Rat lung airway and parenchyma cDNA libraries Rattus norvegicus cDNA clone Contig1108 5', mRNA sequence [CF108188]	CF108188	FALSE
A_44_P162224	0.0197154	0.000312313	0.0783292	-0.287074	-0.494533	0.318818	0.531556	CB545165	CB545165	CB545165 AMGNNUC:SRPB2-00312-H9-A srpb2 (10220) Rattus norvegicus cDNA clone srpb2-00312-h9 5', mRNA sequence [CB545165]	CB545165	FALSE
A_43_P21003	0.0252748	0.000977642	0.45176	0.105601	-0.244786	0.719522	0.762713	NM_001033892	RGD1306841	Rattus norvegicus similar to RIKEN cDNA 2410006F12 (RGD1306841), mRNA [NM_001033892]	NM_001033892	FALSE
A_44_P202183	0.0303533	0.00190194	0.117008	0.145198	-0.227498	-0.729287	-0.692935	AA866231	AA866231	AA866231 UI-R-A0-bg-f-06-0-UI.s1 UI-R-A0 Rattus norvegicus cDNA clone UI-R-A0-bg-f-06-0-UI 3' similar to gb [AA866231]	AA866231	FALSE
A_44_P960243	0.0234048	0.000796547	-0.367035	-0.695279	-0.972837	-0.104203	-0.187613	ENSRNOT00000006050	ENSRNOT00000006050	PREDICTED: Rattus norvegicus zinc finger, BED domain containing 4 (predicted) (Zbed4_predicted), mRNA [XM_235553]		FALSE
A_43_P12761	0.0484504	0.00628319	0.279487	-0.239398	-0.75034	0.00387847	-0.04153	NM_053311	Atp2b1	Rattus norvegicus ATPase, Ca++ transporting, plasma membrane 1 (Atp2b1), mRNA [NM_053311]	NM_053311	FALSE
A_44_P920120	0.0369859	0.00330619	0.180707	-0.039308	-0.105217	0.852636	0.967994	XM_001066536	LOC686098	PREDICTED: Rattus norvegicus similar to sorbin and SH3 domain containing 1 isoform 3 (LOC686098), mRNA [XM_001066536]	XM_001066536	FALSE
A_44_P635400	0.02279	0.000723398	0.210532	-0.077965	-0.3359	-0.107912	-0.205527	ENSRNOT00000060467	Rab2b	RAB2B, member RAS oncogene family [Source:RefSeq_peptide;Acc:NP_001032734] [ENSRNOT00000060467]		FALSE
A_44_P254973	0.0344795	0.00273446	0.0238293	0.00520176	-0.303201	-0.311715	-0.0125829	NM_198051	Mds024	Rattus norvegicus putative RNA methylase MDS024 (Mds024), mRNA [NM_198051]	NM_198051	FALSE
A_44_P276501	0.0366551	0.00323569	0.349628	0.288984	-0.0804745	0.778842	0.911014	NM_080907	Ppp4r1	Rattus norvegicus protein phosphatase 4, regulatory subunit 1 (Ppp4r1), mRNA [NM_080907]	NM_080907	FALSE
A_42_P797558	0.0263791	0.00117491	-0.0297679	-0.36217	-0.64268	0.470019	0.318417	NM_021699	Mark2	Rattus norvegicus MAP/microtubule affinity-regulating kinase 2 (Mark2), mRNA [NM_021699]	NM_021699	FALSE
A_42_P605386	0.0300629	0.00184106	-0.0412011	-0.192433	-0.640599	0.0604988	0.084867	NM_001007655	MGC94113	Rattus norvegicus similar to Ubc6p homolog (MGC94113), mRNA [NM_001007655]	NM_001007655	FALSE
A_42_P624251	0.038671	0.00374338	-0.100032	-0.510486	-0.899837	0.328867	0.0341954	NM_001033068	LOC361399	Rattus norvegicus similar to autoantigen (LOC361399), mRNA [NM_001033068]	NM_001033068	FALSE
A_44_P851230	0.0462655	0.00563246	0.126741	-0.453611	-0.910828	0.264774	0.161768	BF558478	BF558478	BF558478 UI-R-C1-la-e-02-0-UI.r1 UI-R-C1 Rattus norvegicus cDNA clone UI-R-C1-la-e-02-0-UI 5', mRNA sequence [BF558478]	BF558478	FALSE
A_42_P522562	0.0265174	0.00120203	-0.265013	-0.18794	-0.335035	0.11458	0.158428	XM_228867	Hccs_predicted	Rattus norvegicus similar to holocytochrome c-type synthetase (LOC317444), mRNA [XM_228867]	XM_228867	FALSE
A_44_P164007	0.0217098	0.000573232	-0.49647	-0.996083	-1.17855	0.0498193	0.167167	ENSRNOT00000008459	RGD1561653_predicted	PREDICTED: Rattus norvegicus similar to HECT domain containing 1 (predicted) (RGD1561653_predicted), mRNA [XM_343060]		FALSE
A_44_P536786	0.0323252	0.00222357	0.301386	0.0204358	-0.0383774	0.77573	0.960271	ENSRNOT00000011553	Sec23b_predicted	PREDICTED: Rattus norvegicus SEC23B (S. cerevisiae) (predicted) (Sec23b_predicted), mRNA [XM_342531]		FALSE
A_44_P446556	0.036293	0.00317457	-0.394864	-0.949902	-1.24226	0.0317551	-0.0409473	XM_342906	LOC362587	PREDICTED: Rattus norvegicus similar to microfilament and actin filament cross-linker protein isoform b (LOC362587), mRNA [XM_342906]	XM_342906	FALSE
A_44_P558888	0.027636	0.00138963	-0.0587961	-0.200605	-0.216156	0.647135	0.594957	NM_001005330	Crry	Rattus norvegicus complement receptor related protein (Crry), transcript variant 1, mRNA [NM_001005330]	NM_001005330	FALSE
A_42_P717631	0.0424194	0.00464139	-0.167143	-0.361857	-0.779745	-0.377812	-0.6669	AI230097	AI230097	AI230097 EST226792 Normalized rat embryo, Bento Soares Rattus sp. cDNA clone REMCR05 3' end, mRNA sequence [AI230097]	AI230097	FALSE
A_44_P423509	0.0306419	0.00193462	-0.123545	-0.364567	-0.614739	0.181694	0.330841	ENSRNOT00000016022	Usp33	phosphatidylinositol glycan anchor biosynthesis, class K [Source:RefSeq_peptide;Acc:NP_001011953] [ENSRNOT00000016022]		FALSE
A_42_P525876	0.0429979	0.0047916	-0.0729181	-0.108655	-0.610636	0.113236	0.108583	NM_133397	Erg	Rattus norvegicus v-ets erythroblastosis virus E26 oncogene like (avian) (Erg), mRNA [NM_133397]	NM_133397	FALSE
A_44_P669323	0.018484	0.000210312	0.28369	0.47203	0.0985216	-0.889073	-0.331058	TC605352	TC605352			FALSE
A_44_P264379	0.0475513	0.00600674	-0.025785	-0.228796	-0.56622	-0.204723	-0.0446335	NM_173133	Phax	Rattus norvegicus phosphorylated adaptor for RNA export (Phax), mRNA [NM_173133]	NM_173133	FALSE
A_44_P490967	0.0467949	0.00579038	0.551119	-0.13594	-0.333359	0.497616	0.731159	NM_031002	Inpp4a	Rattus norvegicus inositol polyphosphate-4-phosphatase, type 1 (Inpp4a), mRNA [NM_031002]	NM_031002	FALSE
A_44_P212676	0.0182041	0.000125769	-0.0259751	0.132221	0.0908895	0.532798	1.19075	NM_001004085	Crat	Rattus norvegicus carnitine acetyltransferase (Crat), mRNA [NM_001004085]	NM_001004085	FALSE
A_44_P1053383	0.047297	0.00593004	-0.46802	-0.318436	-0.286903	0.0598174	0.337126	NM_023950	Rab7	Rattus norvegicus RAB7, member RAS oncogene family (Rab7), mRNA [NM_023950]	NM_023950	FALSE
A_44_P134584	0.0323909	0.00225783	0.144424	-0.249988	0.066763	1.41789	1.2929	NM_001007005	Arhgdia	Rattus norvegicus Rho GDP dissociation inhibitor (GDI) alpha (Arhgdia), mRNA [NM_001007005]	NM_001007005	FALSE
A_44_P241258	0.0222712	0.000686908	-0.15643	-0.620425	-0.621397	0.0394737	0.353963	ENSRNOT00000021988	Sdfr2_predicted	PREDICTED: Rattus norvegicus stromal cell derived factor receptor 2 (predicted) (Sdfr2_predicted), mRNA [XM_227622]		FALSE
A_44_P971288	0.030252	0.00187289	-0.228328	-0.597575	-1.15861	-0.270005	-0.276994	XM_226388	Otud4	PREDICTED: Rattus norvegicus OTU domain containing 4 (Otud4), mRNA [XM_226388]	XM_226388	FALSE
A_43_P13843	0.020652	0.000446704	-0.426304	-0.473478	-0.895367	-1.03922	-1.18794	XM_236567	Msl2l1_predicted	PREDICTED: Rattus norvegicus male-specific lethal 2-like 1 (Drosophila) (predicted) (Msl2l1_predicted), mRNA [XM_236567]	XM_236567	FALSE
A_44_P911683	0.0499089	0.00665698	-0.0309479	-0.370471	-0.925355	-0.177095	-0.138322	AW144275	AW144275	AW144275 EST294571 Normalized rat ovary, Bento Soares Rattus sp. cDNA clone RGICP06 5' end, mRNA sequence [AW144275]	AW144275	FALSE
A_43_P11082	0.0377084	0.00347563	-0.261686	-0.739404	-1.00025	-0.800376	-1.04213	TC594998	TC594998	Q8U5W7_AGRT5 (Q8U5W7) AGR_pAT_154p, partial (5%) [TC594998]		FALSE
A_44_P699110	0.0158102	1.79024e-05	-0.216485	-0.355758	-0.651231	0.188842	0.57097	TC601778	TC601778	Q8K0H2_MOUSE (Q8K0H2) Chpt1 protein, partial (18%) [TC601778]		FALSE
A_44_P794669	0.0353555	0.00296768	-0.268699	-0.841296	-1.12232	-0.422367	-0.31044	TC581282	TC581282	Q5BDB7_EMENI (Q5BDB7) Predicted protein, partial (5%) [TC627752]		FALSE
A_44_P529811	0.0242773	0.000863372	0.271888	-0.132551	-0.438241	0.999049	0.462371	ENSRNOT00000014022	Myo10_predicted	PREDICTED: Rattus norvegicus myosin X (predicted) (Myo10_predicted), mRNA [XM_226874]		FALSE
A_42_P683634	0.0461998	0.00561771	0.537626	-0.270028	-0.55973	-0.0340358	-0.222623	NM_012946	Sparcl1	Rattus norvegicus SPARC-like 1 (mast9, hevin) (Sparcl1), mRNA [NM_012946]	NM_012946	FALSE
A_44_P855435	0.0220502	0.000618741	0.42644	0.438259	0.0158799	-0.375329	-0.601553	TC641380	TC641380			FALSE
A_42_P723641	0.0169896	3.39209e-05	0.809982	0.790423	-0.45326	-1.42339	-1.27222	NM_199113	Popdc2	Rattus norvegicus popeye domain containing 2 (Popdc2), mRNA [NM_199113]	NM_199113	FALSE
A_44_P407259	0.0182041	0.000128545	-0.707248	-1.14502	-0.112994	0.175181	1.02161	NM_053774	Usp2	Rattus norvegicus ubiquitin specific peptidase 2 (Usp2), mRNA [NM_053774]	NM_053774	FALSE
A_43_P14436	0.0425699	0.00469105	-0.390489	-0.27145	-0.620271	-0.781241	-0.88714	TC604161	TC604161			FALSE
A_44_P523045	0.0290136	0.00162975	-0.0662339	0.284226	0.0421436	-0.821724	-0.587849	XM_344781	XM_344781	Rattus norvegicus similar to H3 histone, family 3B (LOC365019), mRNA [XM_344781]	XM_344781	FALSE
A_44_P217785	0.0275335	0.00136816	-0.178895	-0.66478	-0.719603	0.504696	0.839268	ENSRNOT00000062012	RGD1306062_predicted	PREDICTED: Rattus norvegicus similar to KIAA0372 gene product (predicted) (RGD1306062_predicted), mRNA [XM_226606]		FALSE
A_44_P216292	0.0477811	0.0060963	-0.290109	-0.589216	-0.851051	-0.664652	-0.943454	BF523623	BF523623	BF523623 UI-R-C1-lc-d-06-0-UI.r1 UI-R-C1 Rattus norvegicus cDNA clone UI-R-C1-lc-d-06-0-UI 5', mRNA sequence [BF523623]	BF523623	FALSE
A_44_P506169	0.0433636	0.00487363	-0.0218999	-0.164947	-0.197722	0.249797	0.356548	NM_001013193	Tial1	Rattus norvegicus Tial1 cytotoxic granule-associated RNA binding protein-like 1 (Tial1), mRNA [NM_001013193]	NM_001013193	FALSE
A_44_P544340	0.0330504	0.00237013	0.0862024	0.0359592	0.294834	0.858777	1.19826	NM_001034939	Obfc2b	Rattus norvegicus oligonucleotide/oligosaccharide-binding fold containing 2B (Obfc2b), mRNA [NM_001034939]	NM_001034939	FALSE
A_42_P671125	0.0305614	0.00192805	0.212525	-0.169284	-0.404717	0.496334	0.59929	ENSRNOT00000029996	Trim28	Transcription intermediary factor 1-beta (TIF1-beta) (Tripartite motif-containing protein 28) (Nuclear corepressor KAP-1) (KRAB- associated protein 1) (Fragment). [Source:Uniprot/SWISSPROT;Acc:O08629] [ENSRNOT00000029996]		FALSE
A_44_P1015495	0.0451094	0.00532689	0.00918949	0.128096	-0.000872016	-0.563124	-0.390966	ENSRNOT00000038092	Rsafd1_predicted	PREDICTED: Rattus norvegicus radical S-adenosyl methionine and flavodoxin domains 1 (predicted) (Rsafd1_predicted), mRNA [XM_222117]		FALSE
A_44_P1047615	0.0459924	0.00556053	-0.24242	-0.414325	-0.629769	-0.189365	-0.141636	XM_341841	Lsm14a_predicted	PREDICTED: Rattus norvegicus LSM14 homolog A (SCD6, S. cerevisiae) (predicted) (Lsm14a_predicted), mRNA [XM_341841]	XM_341841	FALSE
A_44_P326233	0.0420807	0.00454489	-0.109814	-0.241706	-0.316502	0.471673	0.585887	NM_001013210	Fkbp14	Rattus norvegicus FK506 binding protein 14 (Fkbp14), mRNA [NM_001013210]	NM_001013210	FALSE
A_44_P286888	0.0497411	0.0065865	-0.0539006	-0.210326	-0.205975	0.181138	0.184083	NM_031631	Vapa	Rattus norvegicus vesicle-associated membrane protein, associated protein a (Vapa), mRNA [NM_031631]	NM_031631	FALSE
A_44_P316926	0.0405474	0.00422777	-0.425885	-0.329576	-0.420797	-0.843859	-1.0844	BM389600	BM389600	BM389600 UI-R-CN1-cjo-a-07-0-UI.s1 UI-R-CN1 Rattus norvegicus cDNA clone UI-R-CN1-cjo-a-07-0-UI 3', mRNA sequence [BM389600]	BM389600	FALSE
A_44_P292479	0.0435541	0.0049572	0.127361	-0.304671	-0.273937	0.476144	0.561135	NM_053880	Dncic2	Rattus norvegicus dynein, cytoplasmic, intermediate chain 2 (Dncic2), mRNA [NM_053880]	NM_053880	FALSE
A_43_P18690	0.0265174	0.00120311	0.33389	-0.0302657	-0.276349	0.705134	0.898638	NM_001083624	RGD1307094_predicted	Rattus norvegicus similar to KIAA0648 protein (predicted) (RGD1307094_predicted), mRNA [NM_001083624]	NM_001083624	FALSE
A_44_P125681	0.0359755	0.00310209	0.144636	-0.522242	-0.656307	0.676445	0.619599	NM_053354	Dnmt1	Rattus norvegicus DNA (cytosine-5-)-methyltransferase 1 (Dnmt1), mRNA [NM_053354]	NM_053354	FALSE
A_44_P807901	0.018045	7.60751e-05	-0.231276	-0.388555	-0.772175	-1.06107	-1.05168	XM_233970	Smc6l1_predicted	PREDICTED: Rattus norvegicus SMC6 structural maintenance of chromosomes 6-like 1 (yeast) (predicted) (Smc6l1_predicted), mRNA [XM_233970]	XM_233970	FALSE
A_44_P501783	0.025968	0.00109824	0.44708	0.114024	-0.216409	0.609306	0.539422	ENSRNOT00000006755	Ppp2r5e_predicted	PREDICTED: Rattus norvegicus protein phosphatase 2, regulatory subunit B (B56), epsilon isoform (predicted) (Ppp2r5e_predicted), mRNA [XM_216739]		FALSE
A_44_P219854	0.0338452	0.00256385	-0.075837	-0.575237	-1.02494	0.286243	0.0490066	ENSRNOT00000007768	ENSRNOT00000007768	Nuclear receptor coactivator 3 (EC 2.3.1.48) (NCoA-3) (Amplified in breast cancer-1 protein homolog) (AIB-1) (Fragment). [Source:Uniprot/SWISSPROT;Acc:Q9EPU2] [ENSRNOT00000007768]		FALSE
A_44_P504326	0.0233809	0.000791664	-0.256649	-0.423754	-0.532518	-0.108378	-0.00401175	AW918202	AW918202	AW918202 EST349506 Rat gene index, normalized rat, norvegicus, Bento Soares Rattus norvegicus cDNA clone RGIEN76 5' end, mRNA sequence [AW918202]	AW918202	FALSE
A_43_P19994	0.0338804	0.00260619	-0.0163563	-0.389909	-0.708097	0.336192	0.280306	ENSRNOT00000046906	Rlf_predicted	Rattus norvegicus similar to Zinc finger protein Rlf (Rearranged L-myc fusion gene protein) (Zn-15 related protein) (LOC313566), mRNA [XM_233485]		FALSE
A_44_P275901	0.0460457	0.00558776	0.0121599	0.187568	0.1818	-0.288546	-0.406012	AA875660	AA875660	AA875660 UI-R-E0-ct-h-08-0-UI.s1 UI-R-E0 Rattus norvegicus cDNA clone UI-R-E0-ct-h-08-0-UI 3' similar to gi [AA875660]	AA875660	FALSE
A_44_P940327	0.0182041	0.000118507	0.775177	-0.767551	-1.06976	1.62873	1.89328	AI008579	AI008579	AI008579 EST203030 Normalized rat embryo, Bento Soares Rattus sp. cDNA clone REMAZ30 3' end, mRNA sequence [AI008579]	AI008579	FALSE
A_44_P637322	0.035038	0.00286763	-0.189375	-0.470365	-0.709959	-0.315745	-0.15296	XM_574316	LOC499022	PREDICTED: Rattus norvegicus similar to quaking homolog, KH domain RNA binding isoform HQK-6 (LOC499022), mRNA [XM_574316]	XM_574316	FALSE
A_42_P783301	0.0465765	0.00572441	-0.051918	-0.470665	-0.499247	0.357268	0.496289	ENSRNOT00000055277	Itga5	Fibronectin receptor alpha chain (Fragments). [Source:Uniprot/SPTREMBL;Acc:Q7M074] [ENSRNOT00000055277]		FALSE
A_44_P122988	0.027534	0.00137121	-0.371292	-0.557677	-0.600671	-0.224065	0.0236548	ENSRNOT00000057179	ENSRNOT00000057179	RGD1309550 protein (Fragment). [Source:Uniprot/SPTREMBL;Acc:Q5FWY6] [ENSRNOT00000057179]		FALSE
A_44_P277126	0.0222025	0.000664843	-0.272868	-0.195899	-0.429244	0.387992	0.393948	ENSRNOT00000034757	ENSRNOT00000034757	similar to SUMO/sentrin specific protease 5 (LOC679900), mRNA [Source:RefSeq_dna;Acc:XR_005599] [ENSRNOT00000034757]		FALSE
A_44_P310048	0.035281	0.0029442	-0.302754	-0.456598	-0.774335	0.259033	0.426302	BC088309	LOC682097	Rattus norvegicus similar to TBP-associated factor 4, mRNA (cDNA clone IMAGE:7324288), partial cds [BC088309]	BC088309	FALSE
A_44_P714743	0.0300599	0.00183536	-0.223568	-0.6396	-0.962163	0.14215	0.129119	TC593361	TC593361			FALSE
A_44_P245665	0.046024	0.00557044	0.648223	0.178596	-0.316774	0.511909	0.531278	NM_053311	Atp2b1	Rattus norvegicus ATPase, Ca++ transporting, plasma membrane 1 (Atp2b1), mRNA [NM_053311]	NM_053311	FALSE
A_44_P743637	0.0319692	0.00216965	-0.476059	-0.741257	-0.777947	0.0764133	0.0979948	XM_235261	Lrp12_predicted	PREDICTED: Rattus norvegicus low density lipoprotein-related protein 12 (predicted) (Lrp12_predicted), mRNA [XM_235261]	XM_235261	FALSE
A_44_P172825	0.0448814	0.00526042	-0.00124884	-0.247516	-0.938487	0.130771	-0.390419	NM_053846	Nrxn2	Rattus norvegicus neurexin 2 (Nrxn2), mRNA [NM_053846]	NM_053846	FALSE
A_42_P497429	0.0493829	0.00651834	0.515534	-0.0722418	0.0401367	1.623	1.32425	NM_183332	Myadm	Rattus norvegicus myeloid-associated differentiation marker (Myadm), mRNA [NM_183332]	NM_183332	FALSE
A_44_P302923	0.032422	0.00227603	0.166412	-0.425531	-0.666145	0.621907	0.948489	CB606228	CB606228	CB606228 AMGNNUC:SRCS1-00115-D7-A srcs1 (10883) Rattus norvegicus cDNA clone srcs1-00115-d7 5', mRNA sequence [CB606228]	CB606228	FALSE
A_43_P11430	0.0323292	0.00223756	-0.174296	-0.311273	-0.279893	0.322894	0.490728	ENSRNOT00000025193	Adsl_predicted	PREDICTED: Rattus norvegicus adenylosuccinate lyase (predicted) (Adsl_predicted), mRNA [XM_235496]		FALSE
A_44_P1037796	0.0351648	0.00290028	0.227657	-0.0966089	-0.147664	0.657494	0.621209	NM_145090	Arfgap1	Rattus norvegicus ADP-ribosylation factor GTPase activating protein 1 (Arfgap1), mRNA [NM_145090]	NM_145090	FALSE
A_44_P192382	0.0265174	0.0011946	-0.0867075	-0.346623	-0.525419	0.292991	0.318917	NM_001014113	Utp14a	Rattus norvegicus UTP14, U3 small nucleolar ribonucleoprotein, homolog A (yeast) (Utp14a), mRNA [NM_001014113]	NM_001014113	FALSE
A_44_P946005	0.025034	0.000949468	0.508484	0.30752	-0.0858009	0.678574	0.75342	TC608935	TC608935			FALSE
A_44_P902385	0.025968	0.00109722	-0.132287	-0.609281	-0.704173	0.0504906	0.273503	TC630485	TC630485	Q3TDN1_MOUSE (Q3TDN1) NOD-derived CD11c +ve dendritic cells cDNA, RIKEN full-length enriched library, clone:F630018C04 product:adaptor protein complex AP-1, gamma 1 subunit, full insert sequence, partial (65%) [TC630485]		FALSE
A_44_P527185	0.0384248	0.00368767	0.465248	-0.210901	-0.391734	0.215938	0.415621	NM_133541	Gtf3c1	Rattus norvegicus general transcription factor III C 1 (Gtf3c1), mRNA [NM_133541]	NM_133541	FALSE
A_44_P324066	0.0220056	0.000609558	-0.0368732	-0.428133	-0.300806	0.501241	0.791134	XM_001072853	LOC689997	PREDICTED: Rattus norvegicus similar to F33H2.2 (LOC689997), mRNA [XM_001072853]	XM_001072853	FALSE
A_42_P494276	0.0286631	0.00157328	0.714715	0.715688	0.396773	-0.358231	-0.583424	ENSRNOT00000050006	ENSRNOT00000050006	Rattus norvegicus cDNA clone MGC:156700 IMAGE:7099560, complete cds [BC128749]		FALSE
A_44_P142829	0.0265174	0.00119059	0.12103	-0.39634	-0.487984	0.172636	0.499485	NM_031053	Mlh1	Rattus norvegicus mutL homolog 1 (E. coli) (Mlh1), mRNA [NM_031053]	NM_031053	FALSE
A_44_P698940	0.0374728	0.00340792	0.408556	-0.0167674	-0.240206	0.689872	0.706827	ENSRNOT00000018640	ENSRNOT00000018640	PREDICTED: Rattus norvegicus similar to TBC1 domain family, member 8, transcript variant 1 (LOC680133), mRNA [XM_001055675]		FALSE
A_44_P242721	0.0389024	0.00381162	-0.377262	-0.909218	-1.02063	0.0640808	-0.10253	NM_001007146	Tob2	Rattus norvegicus transducer of ERBB2, 2 (Tob2), mRNA [NM_001007146]	NM_001007146	FALSE
A_44_P205908	0.0378161	0.00349997	-0.548019	-0.605972	-0.591076	-0.0717852	-0.0462611	NM_145780	Psg4	Rattus norvegicus pregnancy specific beta-1-glycoprotein 4 (Psg4), mRNA [NM_145780]	NM_145780	FALSE
A_44_P955967	0.0377202	0.0034804	-0.268433	-0.609852	-0.666244	0.0207452	0.114604	AI176314	AI176314	AI176314 EST219897 Normalized rat ovary, Bento Soares Rattus sp. cDNA clone ROVBP94 3' end, mRNA sequence [AI176314]	AI176314	FALSE
A_44_P530570	0.0342343	0.00269678	-0.436904	-0.434475	-1.07419	-0.296687	-0.264285	BQ781257	BQ781257	BQ781257 UI-R-FF0-cpe-k-11-0-UI.s1 NCI_CGAP_FF0 Rattus norvegicus cDNA clone UI-R-FF0-cpe-k-11-0-UI 3', mRNA sequence [BQ781257]	BQ781257	FALSE
A_44_P557141	0.035254	0.00293404	-0.0754652	-0.504533	-0.764019	0.0707494	0.363623	CO568196	CO568196	AGENCOURT_28617456 NIH_MGC_249 Rattus norvegicus cDNA clone IMAGE:7378141 5', mRNA sequence [CO568196]	CO568196	FALSE
A_44_P772662	0.0329963	0.00235171	-0.521702	-0.56058	-0.911722	-0.0743036	0.504726	BG669493	BG669493	BG669493 DRNAAG07 Rat DRG Library Rattus norvegicus cDNA clone DRNAAG07 5', mRNA sequence [BG669493]	BG669493	FALSE
A_44_P910739	0.0280525	0.00146228	-0.105899	-0.342401	-0.658886	-0.325157	-0.426762	DY472814	DY472814	RVL24173 Wackym-Soares normalized rat vestibular cDNA library Rattus norvegicus cDNA 5', mRNA sequence [DY472814]	DY472814	FALSE
A_44_P534467	0.0268416	0.00125024	0.407983	0.422784	-0.0156085	-0.292869	-0.45945	AY539878	RGD1311678	Rattus norvegicus LRRGT00127 mRNA, complete cds. [AY539878]	AY539878	FALSE
A_44_P323955	0.0236583	0.000812984	0.0931676	0.88349	2.70099	-0.565173	-0.0831517	A_44_P323955	A_44_P323955			FALSE
A_44_P409729	0.018484	0.000230923	-0.03192	-0.35848	-0.479971	0.185469	0.338403	NM_133585	Opa1	Rattus norvegicus optic atrophy 1 homolog (human) (Opa1), mRNA [NM_133585]	NM_133585	FALSE
A_44_P367807	0.0242899	0.000868052	-0.146203	-0.0306251	-0.461647	-0.569712	-0.548294	NM_053499	Mterf	Rattus norvegicus mitochondrial transcription termination factor 1 (Mterf), mRNA [NM_053499]	NM_053499	FALSE
A_44_P148708	0.020081	0.000342916	-0.0952786	-0.463419	-0.669965	0.315583	0.436923	DV719178	DV719178	RVL9885 Wackym-Soares normalized rat vestibular cDNA library Rattus norvegicus cDNA 5', mRNA sequence [DV719178]	DV719178	FALSE
A_44_P944375	0.0465765	0.00572949	0.748484	-0.0202038	-0.117882	0.60605	0.507558	ENSRNOT00000041388	ENSRNOT00000041388			FALSE
A_42_P529681	0.0319692	0.00216762	-0.260799	-0.750025	-1.0728	0.113065	-0.0460094	TC591150	TC591150	BC024840 Ascc2 protein {Mus musculus} (exp=-1; wgp=0; cg=0), partial (6%) [TC591150]		FALSE
A_44_P1009948	0.0252935	0.000983303	-0.0658454	-0.0766351	-0.554825	-0.717475	-0.788072	ENSRNOT00000004011	RGD1304587	Multiple myeloma tumor-associated protein 2 homolog. [Source:Uniprot/SWISSPROT;Acc:Q5M9I6] [ENSRNOT00000004011]		FALSE
A_44_P996774	0.0387182	0.00377586	-0.26442	0.00521302	-0.288919	-0.951993	-0.852299	NM_001008335	Eif4a2	Rattus norvegicus eukaryotic translation initiation factor 4A2 (Eif4a2), mRNA [NM_001008335]	NM_001008335	FALSE
A_44_P492587	0.018484	0.000178938	-0.429914	-0.956667	-1.06898	0.128987	0.196807	ENSRNOT00000035785	ENSRNOT00000035785	Eif5b protein (Fragment). [Source:Uniprot/SPTREMBL;Acc:Q4FZQ8] [ENSRNOT00000035785]		FALSE
A_44_P972824	0.0390191	0.00384372	-0.447154	-0.531754	-0.697515	0.206034	0.256974	NM_053655	Dnm1l	Rattus norvegicus dynamin 1-like (Dnm1l), mRNA [NM_053655]	NM_053655	FALSE
A_44_P697736	0.0320261	0.00217868	-0.10283	-0.520909	-0.588091	1.06503	0.873267	AI501106	AI501106	AI501106 UI-R-C2p-rw-f-11-0-UI.s1 UI-R-C2p Rattus norvegicus cDNA clone UI-R-C2p-rw-f-11-0-UI 3', mRNA sequence [AI501106]	AI501106	FALSE
A_44_P267465	0.0458781	0.00553166	0.274332	0.310679	0.0907785	0.703334	0.920844	XM_214668	Hsf4_predicted	PREDICTED: Rattus norvegicus heat shock transcription factor 4 (predicted) (Hsf4_predicted), mRNA [XM_214668]	XM_214668	FALSE
A_42_P497323	0.0319692	0.00216985	-0.175369	-0.699959	-1.20521	0.0873548	0.295509	NM_022951	Ppp1r10	Rattus norvegicus protein phosphatase 1, regulatory subunit 10 (Ppp1r10), mRNA [NM_022951]	NM_022951	FALSE
A_44_P158805	0.0484148	0.00626157	0.446234	0.506998	0.275648	-0.166733	0.0673243	ENSRNOT00000027133	Pcdhb22	Protocadherin-T5 (Fragment). [Source:Uniprot/SPTREMBL;Acc:Q9JIU0] [ENSRNOT00000027133]		FALSE
A_43_P21223	0.0353118	0.00295024	-0.184776	-0.548012	-0.599184	0.800191	0.606836	NM_001012014	Ftsj3	Rattus norvegicus FtsJ homolog 3 (E. coli) (Ftsj3), mRNA [NM_001012014]	NM_001012014	FALSE
A_44_P156647	0.018484	0.000224941	1.19085	1.30707	0.498243	-1.03452	-0.369817	ENSRNOT00000005006	RGD1306212_predicted	PREDICTED: Rattus norvegicus similar to hypothetical protein DKFZp566N034 (predicted) (RGD1306212_predicted), mRNA [XM_341114]		FALSE
A_44_P196922	0.0470227	0.00585197	0.766224	0.455818	-0.201333	0.388534	0.0132065	XM_226510	Cdyl2_predicted	PREDICTED: Rattus norvegicus chromodomain protein, Y chromosome-like 2 (predicted) (Cdyl2_predicted), mRNA [XM_226510]	XM_226510	FALSE
A_44_P658502	0.0497411	0.00660519	-0.719535	-0.911542	-1.29783	0.171259	0.184284	BQ782863	BQ782863	UI-R-FF0-cpl-f-13-0-UI.s1 UI-R-FF0 Rattus norvegicus cDNA clone UI-R-FF0-cpl-f-13-0-UI 3', mRNA sequence [BQ782863]	BQ782863	FALSE
A_44_P550346	0.0206174	0.00043792	-0.127787	-0.438278	-0.998089	-0.835594	-0.790507	NM_021850	Bcl2l2	Rattus norvegicus Bcl2-like 2 (Bcl2l2), mRNA [NM_021850]	NM_021850	FALSE
A_43_P18969	0.0286928	0.00158547	0.0528363	-0.0735168	-0.0110036	1.33505	1.1399	NM_001012174	Fkbp5	Rattus norvegicus FK506 binding protein 5 (Fkbp5), mRNA [NM_001012174]	NM_001012174	FALSE
A_44_P132184	0.045267	0.00539048	-0.147499	-0.565175	-0.820879	-0.0936485	0.0407618	BF290460	BF290460	BF290460 EST455051 Rat Gene Index, normalized rat, Rattus norvegicus cDNA Rattus norvegicus cDNA clone RGIHV87 5' sequence, mRNA sequence [BF290460]	BF290460	FALSE
A_44_P492914	0.0319958	0.00217441	-0.0646535	-0.221426	-0.128931	0.218289	0.482848	BF550034	BF550034	BF550034 UI-R-E0-cp-b-06-0-UI.r1 UI-R-E0 Rattus norvegicus cDNA clone UI-R-E0-cp-b-06-0-UI 5', mRNA sequence [BF550034]	BF550034	FALSE
A_43_P10490	0.0325246	0.00229749	-0.417258	-0.868853	-1.18369	-0.303094	-0.306891	XM_243630	Zc3h7b_predicted	PREDICTED: Rattus norvegicus zinc finger CCCH-type containing 7B (predicted) (Zc3h7b_predicted), mRNA [XM_243630]	XM_243630	FALSE
A_42_P772697	0.0227296	0.000714209	-0.245031	-0.550861	-0.820072	-0.177798	-0.089213	ENSRNOT00000019135	RGD1561833_predicted	PREDICTED: Rattus norvegicus similar to RIKEN cDNA 9330177P20 (predicted) (RGD1561833_predicted), mRNA [XM_342921]		FALSE
A_43_P22590	0.0256092	0.00105871	0.325005	0.664779	0.240033	-0.389868	-0.0956546	XM_215841	XM_215841	Rattus norvegicus similar to hypothetical protein FLJ32800 (LOC296118), mRNA [XM_215841]	XM_215841	FALSE
A_44_P210722	0.0256092	0.00103469	0.116808	0.219004	0.0838616	-0.389062	-0.625965	XM_215438	RGD1305526_predicted	PREDICTED: Rattus norvegicus similar to Sperm 1 POU-domain transcription factor (SPRM-1) (predicted) (RGD1305526_predicted), mRNA [XM_215438]	XM_215438	FALSE
A_44_P230320	0.0464747	0.00568283	0.461171	0.27289	-0.704251	0.0118811	-0.309937	NM_031512	Il1b	Rattus norvegicus interleukin 1 beta (Il1b), mRNA [NM_031512]	NM_031512	FALSE
A_44_P1025386	0.0338452	0.00258608	-0.1298	0.0377889	-0.170048	-1.84675	-1.46679	BF564217	BF564217	BF564217 UI-R-C4-alk-b-02-0-UI.r1 UI-R-C4 Rattus norvegicus cDNA clone UI-R-C4-alk-b-02-0-UI 5', mRNA sequence [BF564217]	BF564217	FALSE
A_44_P421312	0.0369069	0.0032813	-0.279119	-0.107439	-0.0481737	0.0315938	0.562271	NM_012800	P2ry1	Rattus norvegicus purinergic receptor P2Y, G-protein coupled 1 (P2ry1), mRNA [NM_012800]	NM_012800	FALSE
A_44_P133335	0.0415037	0.00444011	-0.953467	1.07679	1.35515	-1.10482	-1.20934	XM_001063747	LOC685424	PREDICTED: Rattus norvegicus hypothetical protein LOC685424 (LOC685424), mRNA [XM_001063747]	XM_001063747	FALSE
A_44_P914151	0.0387182	0.00377448	-0.329341	-0.790579	-0.321543	0.144085	0.716746	TC622442	TC622442	Q7TQ12_RAT (Q7TQ12) Aa1114, partial (9%) [TC622442]		FALSE
A_43_P17005	0.0169896	3.72451e-05	-0.22889	-0.0505867	-0.440227	0.0803443	0.430384	NM_001025697	RGD1305387	Rattus norvegicus similar to RIKEN cDNA 2610207I16 (RGD1305387), mRNA [NM_001025697]	NM_001025697	FALSE
A_43_P16582	0.0222712	0.000686848	-0.746761	-0.406667	-0.681751	-1.7131	-1.48863	CK601207	CK601207	AGENCOURT_17900480 NIH_MGC_234 Rattus norvegicus cDNA clone IMAGE:7190595 5', mRNA sequence [CK601207]	CK601207	FALSE
A_44_P316916	0.0498218	0.0066201	0.581622	0.0684106	0.25252	0.702286	0.917568	XM_213595	XM_213595	Rattus norvegicus similar to glyceraldehyde-3-phosphate dehydrogenase (LOC288039), mRNA [XM_213595]	XM_213595	FALSE
A_44_P129029	0.0271376	0.00130124	0.181919	0.715416	0.66068	-0.585021	-0.015298	ENSRNOT00000008782	Hoxa7	Homeobox protein Hox-A7 (Hox-1.1) (Homeobox protein R5) (Fragment). [Source:Uniprot/SWISSPROT;Acc:P09634] [ENSRNOT00000008782]		FALSE
A_44_P194294	0.0256092	0.00104818	0.343561	0.189091	0.285763	1.4273	1.44927	NM_001008370	MGC105830	Rattus norvegicus similar to Ras-related protein Rab-1B (MGC105830), mRNA [NM_001008370]	NM_001008370	FALSE
A_44_P737376	0.0269314	0.00125952	0.600123	-0.0219615	-0.502399	1.02215	1.28409	CV076506	CV076506	AGENCOURT_31479076 NIH_MGC_251 Rattus norvegicus cDNA clone IMAGE:7385236 5', mRNA sequence [CV076506]	CV076506	FALSE
A_43_P17716	0.0378833	0.00355009	-0.207501	-0.334621	-0.358509	0.219319	0.192177	CB545120	CB545120	CB545120 AMGNNUC:NRDG1-00187-D5-A nrdg1 (10855) Rattus norvegicus cDNA clone nrdg1-00187-d5 5', mRNA sequence [CB545120]	CB545120	FALSE
A_44_P516948	0.0231147	0.000765465	-0.41766	-0.927383	-1.34052	-0.420457	-0.264874	AW920944	AW920944	EST352248 Rat gene index, normalized rat, norvegicus, Bento Soares Rattus norvegicus cDNA clone RGIHK06 5' end, mRNA sequence [AW920944]	AW920944	FALSE
A_44_P153617	0.0285048	0.0015289	-0.531135	0.0277417	0.0663921	-0.763783	-1.03814	AA900122	AA900122	AA900122 UI-R-E0-dm-a-01-0-UI.s1 UI-R-E0 Rattus norvegicus cDNA clone UI-R-E0-dm-a-01-0-UI 3' similar to gi [AA900122]	AA900122	FALSE
A_44_P170527	0.0190847	0.000269623	-0.15342	-0.566257	-1.0221	-0.88579	-0.815896	NM_021266	Fzd1	Rattus norvegicus frizzled homolog 1 (Drosophila) (Fzd1), mRNA [NM_021266]	NM_021266	FALSE
A_44_P454872	0.0236589	0.000816367	-0.261633	-0.793338	-0.934218	0.0774113	0.344588	BC099150	RGD1308009	Rattus norvegicus similar to KIAA1007 protein; adrenal gland protein AD-005, mRNA (cDNA clone IMAGE:7367094), complete cds. [BC099150]	BC099150	FALSE
A_44_P1011008	0.0471808	0.0058841	-0.328796	-0.479178	-0.525987	-0.182902	0.102142	BC079339	Atp6ap2	Rattus norvegicus ATPase, H+ transporting, lysosomal accessory protein 2, mRNA (cDNA clone MGC:94783 IMAGE:7106562), complete cds. [BC079339]	BC079339	FALSE
A_44_P313431	0.0459924	0.00556322	-0.217566	-0.568858	-0.877435	-0.262573	-0.367896	ENSRNOT00000009755	ENSRNOT00000009755	PREDICTED: Rattus norvegicus THO complex 2 (predicted) (Thoc2_predicted), mRNA [XM_233081]		FALSE
A_44_P570959	0.0435939	0.00499502	-0.382553	-0.359241	-0.613503	-1.2009	-1.28996	DV727605	DV727605	RVL20128 Wackym-Soares normalized rat vestibular cDNA library Rattus norvegicus cDNA 5', mRNA sequence [DV727605]	DV727605	FALSE
A_44_P806040	0.0224518	0.000695637	0.134972	-0.189919	-0.407571	0.36334	0.428232	ENSRNOT00000008482	Tlk2_predicted	Tlk2_predicted protein (Fragment). [Source:Uniprot/SPTREMBL;Acc:Q5RJQ5] [ENSRNOT00000008482]		FALSE
A_44_P879120	0.0221841	0.000644034	-0.390769	-0.501888	-0.532529	0.0757458	0.180692	AW914513	AW914513	AW914513 EST345817 Normalized rat brain, Bento Soares Rattus sp. cDNA clone RGIAG54 5' end, mRNA sequence [AW914513]	AW914513	FALSE
A_44_P961330	0.018484	0.000211479	-0.465918	-0.678637	-0.957529	-0.17459	0.182266	TC598775	TC598775	Q4SLG1_TETNG (Q4SLG1) Chromosome 7 SCAF14557, whole genome shotgun sequence. (Fragment), partial (3%) [TC598775]		FALSE
A_44_P319354	0.0244003	0.00089553	-0.113924	0.023261	-0.0331186	-0.776589	-0.776611	BM383925	BM383925	BM383925 UI-R-DM1-ckc-c-11-0-UI.s1 UI-R-DM1 Rattus norvegicus cDNA clone UI-R-DM1-ckc-c-11-0-UI 3', mRNA sequence [BM383925]	BM383925	FALSE
A_44_P821396	0.0200915	0.000359337	-0.130995	-0.102984	-0.12799	0.222938	0.549045	ENSRNOT00000018043	RGD1564625_predicted	PREDICTED: Rattus norvegicus similar to transmembrane protein TM9SF3 (predicted) (RGD1564625_predicted), mRNA [XM_220013]		FALSE
A_44_P111709	0.0338452	0.00256839	0.469319	0.862845	1.26333	-0.456005	0.269059	NM_173317	LOC286983	Rattus norvegicus putative pheromone receptor (Go-VN3) (LOC286983), mRNA [NM_173317]	NM_173317	FALSE
A_44_P297398	0.0475632	0.00603739	-0.019617	-0.223051	-0.580619	-0.338725	-0.208243	ENSRNOT00000005032	Rps6kc1	Rattus norvegicus ribosomal protein S6 kinase, polypeptide 1, mRNA (cDNA clone IMAGE:5599778) [BC064438]		FALSE
A_44_P534211	0.0222025	0.000661452	-0.252573	-0.397488	-0.538399	-0.00225604	0.0757262	ENSRNOT00000005961	Adss_predicted	Rattus norvegicus similar to ADENYLOSUCCINATE SYNTHETASE, NON-MUSCLE ISOZYME (IMP--ASPARTATE LIGASE) (ADSS) (AMPSASE) (LOC289276), mRNA [XM_222946]		FALSE
A_44_P189237	0.0411898	0.00436027	0.126872	0.0490538	0.056404	-0.592689	-0.614078	ENSRNOT00000010623	ENSRNOT00000010623	LIM domain only protein 3 (Neuronal-specific transcription factor DAT1). [Source:Uniprot/SWISSPROT;Acc:Q99MB5] [ENSRNOT00000010623]		FALSE
A_44_P253122	0.0370388	0.00332424	0.134421	-0.45807	-0.748504	0.417359	0.361325	ENSRNOT00000012094	RGD1306717_predicted	PREDICTED: Rattus norvegicus similar to hypothetical protein MGC25461 (predicted) (RGD1306717_predicted), mRNA [XR_006980]		FALSE
A_44_P411386	0.018484	0.000205364	-0.286791	-0.692672	-0.899637	0.0818286	0.127544	DV726507	DV726507	RVL18847 Wackym-Soares normalized rat vestibular cDNA library Rattus norvegicus cDNA 5', mRNA sequence [DV726507]	DV726507	FALSE
A_44_P990467	0.0398415	0.00408003	0.225057	-0.446107	-0.82996	-0.287052	0.00742173	BE113961	BE113961	UI-R-BJ1-awi-d-11-0-UI.s1 UI-R-BJ1 Rattus norvegicus cDNA clone UI-R-BJ1-awi-d-11-0-UI 3', mRNA sequence [BE113961]	BE113961	FALSE
A_44_P605101	0.0340245	0.00263827	-0.396065	-0.912732	-1.39082	-0.276535	-0.16281	BF557668	BF557668	BF557668 UI-R-C0-hz-g-04-0-UI.r1 UI-R-C0 Rattus norvegicus cDNA clone UI-R-C0-hz-g-04-0-UI 5', mRNA sequence [BF557668]	BF557668	FALSE
A_44_P1049236	0.0486086	0.00632975	0.208404	-0.221677	-0.311759	0.397531	0.481914	NM_001034928	Immt	Rattus norvegicus inner membrane protein, mitochondrial (Immt), mRNA [NM_001034928]	NM_001034928	FALSE
A_44_P145023	0.0206174	0.000437444	-0.215681	-0.245313	-0.553842	-0.115766	0.0631306	XM_216331	RGD1305828_predicted	PREDICTED: Rattus norvegicus similar to hypothetical protein (predicted) (RGD1305828_predicted), mRNA [XM_216331]	XM_216331	FALSE
A_44_P355861	0.031494	0.00209118	-0.251383	-0.344428	-0.545985	0.781906	0.650862	NM_181475	Cd2ap	Rattus norvegicus CD2-associated protein (Cd2ap), mRNA [NM_181475]	NM_181475	FALSE
A_43_P14686	0.0294903	0.00172604	-0.351445	-1.107	-1.41237	0.0103527	-0.00751746	ENSRNOT00000015920	Ubap2_predicted	PREDICTED: Rattus norvegicus ubiquitin-associated protein 2 (predicted) (Ubap2_predicted), mRNA [XM_232901]		FALSE
A_44_P236393	0.0458302	0.00551933	-0.084977	-0.363662	-0.628077	0.536395	0.415238	ENSRNOT00000016347	RGD1305605_predicted	PREDICTED: Rattus norvegicus similar to 2610033H07Rik protein (predicted) (RGD1305605_predicted), mRNA [XM_214059]		FALSE
A_44_P865197	0.0378833	0.00356499	0.344727	-0.0830614	-0.461645	0.00373435	0.356371	BE107130	BE107130	UI-R-BS1-ayq-b-11-0-UI.s1 UI-R-BS1 Rattus norvegicus cDNA clone UI-R-BS1-ayq-b-11-0-UI 3', mRNA sequence [BE107130]	BE107130	FALSE
A_44_P406195	0.0203907	0.000407981	0.110791	-0.40919	-0.5256	0.488372	0.584381	NM_001013869	RGD1306108	Rattus norvegicus similar to cDNA sequence BC016188 (RGD1306108), mRNA [NM_001013869]	NM_001013869	FALSE
A_44_P1017079	0.0207852	0.000480975	-0.270884	-0.277319	-0.529905	-0.579535	-0.595867	NM_001013097	Rnaseh1	Rattus norvegicus ribonuclease H1 (Rnaseh1), mRNA [NM_001013097]	NM_001013097	FALSE
A_44_P164120	0.0175169	5.03483e-05	-0.418175	-0.517334	-0.575732	0.176361	0.393449	XM_237623	Gtf3c3_predicted	PREDICTED: Rattus norvegicus general transcription factor IIIC, polypeptide 3, 102kDa (predicted) (Gtf3c3_predicted), mRNA [XM_237623]	XM_237623	FALSE
A_44_P943285	0.0363754	0.00319506	0.0951935	-0.768246	-1.26261	0.254319	0.0308341	XM_573664	RGD1566234_predicted	PREDICTED: Rattus norvegicus similar to Grb10 protein (predicted) (RGD1566234_predicted), mRNA [XM_573664]	XM_573664	FALSE
A_44_P368901	0.0472006	0.00590691	0.0836762	0.588149	0.745439	-0.370764	-0.137982	ENSRNOT00000020641	RGD1566408_predicted	similar to lin-28 homolog (LOC503116), mRNA [Source:RefSeq_dna;Acc:XR_008896] [ENSRNOT00000020641]		FALSE
A_44_P184650	0.0241953	0.00085638	0.108756	-0.00846529	-0.318589	-0.492171	-0.516908	NM_001004205	MGC94142	Rattus norvegicus similar to cDNA sequence BC003324 (MGC94142), mRNA [NM_001004205]	NM_001004205	FALSE
A_44_P176169	0.0203907	0.000396987	-0.228213	0.0944869	-0.0385799	-1.03222	-1.2919	BI292019	BI292019	BI292019 UI-R-DN0-ciu-c-04-0-UI.s1 UI-R-DN0 Rattus norvegicus cDNA clone UI-R-DN0-ciu-c-04-0-UI 3', mRNA sequence [BI292019]	BI292019	FALSE
A_44_P152144	0.0266542	0.00121409	-0.37983	-0.034122	-0.339875	-0.703846	-0.805023	NM_001025637	Psmb10	Rattus norvegicus proteasome (prosome, macropain) subunit, beta type 10 (Psmb10), mRNA [NM_001025637]	NM_001025637	FALSE
A_44_P411919	0.0498218	0.00662383	-0.131657	-0.581004	-0.829371	-0.312748	-0.121669	NM_031978	Psmd1	Rattus norvegicus proteasome (prosome, macropain) 26S subunit, non-ATPase, 1 (Psmd1), mRNA [NM_031978]	NM_031978	FALSE
A_44_P607859	0.0403985	0.00420183	-0.24773	-0.584765	-1.06736	-0.558182	-0.327331	TC603080	TC603080			FALSE
A_44_P330170	0.0182041	0.000113462	-0.605888	-0.85093	-0.820944	0.228714	0.318818	NM_053655	Dnm1l	Rattus norvegicus dynamin 1-like (Dnm1l), mRNA [NM_053655]	NM_053655	FALSE
A_43_P15645	0.0468914	0.00580688	-0.0236633	-0.559058	-0.87118	-0.744311	-0.669192	NM_053876	Hnrpm	Rattus norvegicus heterogeneous nuclear ribonucleoprotein M (Hnrpm), mRNA [NM_053876]	NM_053876	FALSE
A_44_P500431	0.0182041	0.000144879	-0.0468286	-0.397686	-0.34353	0.579818	0.634948	NM_053886	Lman1	Rattus norvegicus lectin, mannose-binding, 1 (Lman1), mRNA [NM_053886]	NM_053886	FALSE
A_44_P547609	0.0378161	0.00349906	0.412657	0.779544	1.05384	-0.129836	0.0396867	AW141666	AW141666	AW141666 EST291739 Normalized rat embryo, Bento Soares Rattus sp. cDNA clone RGICC54 5' end similar to transcription factor Fra-2, mRNA sequence [AW141666]	AW141666	FALSE
A_44_P305073	0.0208023	0.000483398	-0.311593	-0.806869	-0.737597	0.649572	0.380334	XM_001058095	LOC685232	PREDICTED: Rattus norvegicus similar to ATPase, H+ transporting, V1 subunit A, isoform 1, transcript variant 2 (LOC685232), mRNA [XM_001058095]	XM_001058095	FALSE
A_44_P267117	0.0256092	0.0010549	-0.0149857	-0.364887	0.0948659	0.854322	1.1688	NM_080783	Gale	Rattus norvegicus galactose-4-epimerase, UDP (Gale), mRNA [NM_080783]	NM_080783	FALSE
A_44_P512828	0.040297	0.00417752	-0.110778	-0.56935	-0.652993	-0.0115749	0.280259	NM_053322	Pom210	Rattus norvegicus nuclear pore membrane glycoprotein 210 (Pom210), mRNA [NM_053322]	NM_053322	FALSE
A_42_P633840	0.0227898	0.000718426	-0.324894	-0.367686	-0.0658256	0.47953	0.755991	NM_001012200	Ttll1	Rattus norvegicus tubulin tyrosine ligase-like 1 (Ttll1), mRNA [NM_001012200]	NM_001012200	FALSE
A_44_P422321	0.020081	0.00035418	-0.166558	-0.541283	-0.535902	0.33018	0.404306	ENSRNOT00000010010	Vps53_predicted	PREDICTED: Rattus norvegicus vacuolar protein sorting 53 (yeast) (predicted) (Vps53_predicted), mRNA [XM_213395]		FALSE
A_43_P11984	0.0182041	0.000123989	0.123545	-0.214857	-0.258225	0.846633	0.999196	AF127798	Itsn1	Rattus norvegicus EH- and SH3-domain containing protein EHSH1 mRNA, complete cds. [AF127798]	AF127798	FALSE
A_43_P11146	0.0444724	0.00517368	-0.361479	-0.148459	-0.345505	-0.823327	-0.869164	ENSRNOT00000032865	Lyplal1_predicted	PREDICTED: Rattus norvegicus lysophospholipase-like 1 (predicted) (Lyplal1_predicted), mRNA [XM_213970]		FALSE
A_42_P604900	0.0222025	0.000668442	-0.39935	-0.59113	-1.18954	-1.05933	-1.17701	NM_199117	Cbx7	Rattus norvegicus chromobox homolog 7 (Cbx7), mRNA [NM_199117]	NM_199117	FALSE
A_44_P386176	0.0263791	0.00115734	0.171722	-0.0795528	0.079116	0.878226	1.04594	ENSRNOT00000039621	Sec61a2_predicted	PREDICTED: Rattus norvegicus Sec61, alpha subunit 2 (S. cerevisiae) (predicted) (Sec61a2_predicted), mRNA [XM_341558]		FALSE
A_44_P340359	0.0263791	0.00115426	-0.048544	-0.156418	-0.54067	-0.666871	-0.506613	NM_001004445	Znf183	Rattus norvegicus zinc finger protein 183 (RING finger, C3HC4 type) (Znf183), mRNA [NM_001004445]	NM_001004445	FALSE
A_43_P10818	0.0330504	0.00237222	-0.315662	-0.566662	-1.04058	-0.428655	-0.361414	DV729231	DV729231	RVL22020 Wackym-Soares normalized rat vestibular cDNA library Rattus norvegicus cDNA 5', mRNA sequence [DV729231]	DV729231	FALSE
A_44_P195816	0.0218785	0.000589514	-0.313404	-0.124538	-0.135717	-0.64231	-0.681832	BM986566	BM986566	BM986566 EST594160 Rat gene index, normalized rat, norvegicus Rattus norvegicus cDNA clone RGOAD21 3' end, mRNA sequence [BM986566]	BM986566	FALSE
A_44_P108217	0.0169258	3.13333e-05	-0.470535	-1.02843	-0.810087	0.543249	1.13624	ENSRNOT00000056471	ENSRNOT00000056471	PREDICTED: Rattus norvegicus similar to Epiplakin (LOC680860), mRNA [XM_001059215]		FALSE
A_44_P447781	0.0400679	0.00412057	-0.91221	1.22298	1.42766	-1.11263	-1.49871	ENSRNOT00000044993	ENSRNOT00000044993	similar to RIKEN cDNA 1700081O22 (LOC363337), mRNA [Source:RefSeq_dna;Acc:NM_001014221] [ENSRNOT00000044993]		FALSE
A_44_P273595	0.0391508	0.00387747	-0.422039	-0.624563	-0.728599	-0.264212	-0.0988989	AW915828	AW915828	AW915828 EST347132 Rat gene index, normalized rat, norvegicus, Bento Soares Rattus norvegicus cDNA clone RGIDB27 5' end, mRNA sequence [AW915828]	AW915828	FALSE
A_44_P198716	0.0222025	0.000662666	-0.136371	-0.470269	-0.515836	0.215803	0.589635	ENSRNOT00000031907	Pls3	Plastin-3 (T-plastin). [Source:Uniprot/SWISSPROT;Acc:Q63598] [ENSRNOT00000031907]		FALSE
A_44_P414996	0.0373378	0.0033893	-0.087069	-0.272458	-0.761133	1.17732	0.867378	NM_001005879	Gfpt1	Rattus norvegicus glutamine fructose-6-phosphate transaminase 1 (Gfpt1), mRNA [NM_001005879]	NM_001005879	FALSE
A_44_P343303	0.018117	7.90576e-05	0.160501	-0.0275354	-0.291771	-0.247334	-0.172156	NM_019367	Ppt2	Rattus norvegicus palmitoyl-protein thioesterase 2 (Ppt2), mRNA [NM_019367]	NM_019367	FALSE
A_42_P670901	0.0263791	0.00116627	-0.263537	-1.04649	-0.972126	0.42661	0.516287	TC597276	TC597276			FALSE
A_44_P116230	0.0331561	0.0023944	-0.0527412	-0.652434	-0.523881	0.685513	0.592036	NM_134405	Slc12a9	Rattus norvegicus solute carrier family 12 (potassium/chloride transporters), member 9 (Slc12a9), mRNA [NM_134405]	NM_134405	FALSE
A_44_P728923	0.0338356	0.00253141	0.170193	0.607488	0.684099	-0.242373	-0.00181472	A_44_P728923	A_44_P728923			FALSE
A_44_P126249	0.0373305	0.00338624	-0.225002	-0.291785	-0.448475	0.721363	0.528427	XM_001077010	LOC691149	PREDICTED: Rattus norvegicus similar to capping protein (actin filament) muscle Z-line, alpha 1 (LOC691149), mRNA [XM_001077010]	XM_001077010	FALSE
A_44_P133344	0.0455224	0.00543554	0.0974581	-0.00547808	0.0146946	0.698015	0.690568	NM_001014153	RGD1304869_predicted	Rattus norvegicus similar to arginine N-methyltransferase p82 isoform (predicted) (RGD1304869_predicted), mRNA [NM_001014153]	NM_001014153	FALSE
A_42_P715210	0.0386812	0.00375115	0.0688873	-0.328495	-0.146048	0.48815	0.615934	ENSRNOT00000061268	ENSRNOT00000061268	PREDICTED: Rattus norvegicus similar to ATP-binding cassette, sub-family G (WHITE), member 3 (predicted) (RGD1564709_predicted), mRNA [XM_223174]		FALSE
A_43_P20729	0.0221841	0.000648438	0.435515	-0.322648	-0.449718	1.2911	1.35647	NM_212462	Bat2	Rattus norvegicus HLA-B associated transcript 2 (Bat2), mRNA [NM_212462]	NM_212462	FALSE
A_44_P806145	0.0432036	0.00484151	-0.112965	-0.163187	-0.0980897	0.269999	0.465806	ENSRNOT00000058239	ENSRNOT00000058239			FALSE
A_44_P160381	0.0182041	0.000144792	-0.0658509	-0.246106	-0.26749	0.455326	0.561684	XM_001074215	LOC498351	PREDICTED: Rattus norvegicus similar to signal recognition particle,72 kDa subunit (LOC498351), mRNA [XM_001074215]	XM_001074215	FALSE
A_44_P306355	0.0220056	0.000613858	-0.0705086	-0.558484	-0.844383	0.312031	0.355105	NM_053827	Plod1	Rattus norvegicus procollagen-lysine, 2-oxoglutarate 5-dioxygenase 1 (Plod1), mRNA [NM_053827]	NM_053827	FALSE
A_44_P515326	0.0313843	0.00206558	-0.0965411	-0.136468	-0.0339638	0.108375	0.435294	NM_053437	Dgat1	Rattus norvegicus diacylglycerol O-acyltransferase 1 (Dgat1), mRNA [NM_053437]	NM_053437	FALSE
A_44_P328340	0.044952	0.00528422	-0.474583	-0.880983	-0.834804	0.0412936	-0.0831436	ENSRNOT00000037061	RGD1561605_predicted	Rattus norvegicus similar to CG9638-PA (LOC289717), mRNA [XM_223519]		FALSE
A_44_P530999	0.0423094	0.00461748	0.0921464	0.238098	0.25107	-0.562391	-1.02205	AA860038	AA860038	AA860038 UI-R-E0-bz-f-05-0-UI.s2 UI-R-E0 Rattus norvegicus cDNA clone UI-R-E0-bz-f-05-0-UI 3' similar to gb [AA860038]	AA860038	FALSE
A_44_P365286	0.0427143	0.00472569	-0.301789	-0.33134	-0.0496653	0.825031	1.31653	NM_022407	Aldh1a1	Rattus norvegicus aldehyde dehydrogenase family 1, member A1 (Aldh1a1), mRNA [NM_022407]	NM_022407	FALSE
A_42_P604490	0.0336677	0.00250027	-0.0623498	-0.244772	-0.602089	-0.520213	-0.54308	NM_080895	Faim	Rattus norvegicus Fas apoptotic inhibitory molecule (Faim), mRNA [NM_080895]	NM_080895	FALSE
A_44_P164889	0.0424942	0.0046707	0.255172	0.158565	0.0272011	0.408533	0.367988	NM_053615	Csnk1a1	Rattus norvegicus casein kinase 1, alpha 1 (Csnk1a1), mRNA [NM_053615]	NM_053615	FALSE
A_44_P1051990	0.0394778	0.00399094	-0.243617	-0.644468	-0.967229	-0.441141	-0.415348	BE113411	BE113411	UI-R-BJ1-awl-a-06-0-UI.s1 UI-R-BJ1 Rattus norvegicus cDNA clone UI-R-BJ1-awl-a-06-0-UI 3', mRNA sequence [BE113411]	BE113411	FALSE
A_44_P710478	0.0284849	0.00152192	0.295626	0.423278	0.778435	-0.569904	-0.14049	AI145372	AI145372	AI145372 UI-R-BT0-qe-b-12-0-UI.s1 UI-R-BT0 Rattus norvegicus cDNA clone UI-R-BT0-qe-b-12-0-UI 3', mRNA sequence [AI145372]	AI145372	FALSE
A_44_P255934	0.0338356	0.00253335	0.0327843	-0.390385	-0.0915453	0.456004	0.575006	ENSRNOT00000036814	Usp32_predicted	Rattus norvegicus similar to ubiquitin specific protease 32; ubiquitin specific protease (LOC303394), mRNA [XM_220798]		FALSE
A_44_P994492	0.0450333	0.00530681	0.282443	0.412906	0.45276	1.36496	2.05994	NM_022297	Ddah1	Rattus norvegicus dimethylarginine dimethylaminohydrolase 1 (Ddah1), mRNA [NM_022297]	NM_022297	FALSE
A_43_P14812	0.0213877	0.000543888	-0.347813	-0.260948	-0.530884	-0.978696	-0.975684	ENSRNOT00000027094	RGD1560566_predicted	PREDICTED: Rattus norvegicus RGD1560566 (predicted) (RGD1560566_predicted), mRNA [XM_219337]		FALSE
A_44_P1022265	0.0497411	0.00659876	-0.224109	-0.789077	-0.992075	-0.329996	-0.453544	XM_221627	Brwd1_predicted	PREDICTED: Rattus norvegicus bromodomain and WD repeat domain containing 1 (predicted) (Brwd1_predicted), mRNA [XM_221627]	XM_221627	FALSE
A_44_P219915	0.047043	0.00585797	-0.125691	-0.276764	-0.393789	0.0802578	0.223913	BC090326	Psme4	Rattus norvegicus proteasome (prosome, macropain) activator subunit 4, mRNA (cDNA clone IMAGE:7128175), complete cds. [BC090326]	BC090326	FALSE
A_44_P533959	0.0297375	0.00176597	-0.125379	-0.276181	-0.461662	1.08713	1.11293	NM_054001	Scarb2	Rattus norvegicus scavenger receptor class B, member 2 (Scarb2), mRNA [NM_054001]	NM_054001	FALSE
A_44_P461912	0.0354357	0.00301239	-0.219479	-0.335956	-0.480169	-0.0374492	-0.0344895	ENSRNOT00000044240	Stag2_predicted	Rattus norvegicus similar to stromal antigen 2 (LOC313304), mRNA [XM_233108]		FALSE
A_42_P656217	0.018484	0.000195434	-0.281908	-0.520397	-0.675851	0.0516638	0.114665	BC070942	BC070942	Rattus norvegicus hemochromatosis, mRNA (cDNA clone MGC:91432 IMAGE:7099667), complete cds [BC070942]	BC070942	FALSE
A_42_P647109	0.028084	0.00147076	0.000275969	-0.487614	-1.03205	-0.667027	-0.690877	XM_224646	Mmrn2_predicted	PREDICTED: Rattus norvegicus multimerin 2 (predicted) (Mmrn2_predicted), mRNA [XM_224646]	XM_224646	FALSE
A_44_P776321	0.0450333	0.00530286	-0.0135731	0.115046	-0.112823	-0.549954	-0.299364	DN932270	DN932270	AGENCOURT_50134733 NCI_CGAP_Pr49 Rattus norvegicus cDNA clone IMAGE:7930352 5', mRNA sequence [DN932270]	DN932270	FALSE
A_44_P369997	0.0386812	0.00375939	0.75706	-0.0169513	0.0479715	1.26583	1.03196	AB040807	Trpm4	Rattus norvegicus MLS2s mRNA for melastatin like 2, complete cds. [AB040807]	AB040807	FALSE
A_44_P188857	0.0338804	0.0026058	0.0841187	-0.294789	-0.585247	0.333652	0.251238	ENSRNOT00000046032	Pcm1	PCM-1 (Fragment). [Source:Uniprot/SPTREMBL;Acc:O08778] [ENSRNOT00000046032]		FALSE
A_44_P300018	0.018045	7.01025e-05	-0.0245078	-0.187162	-0.0701834	0.90036	1.04379	ENSRNOT00000007654	Map3k7_predicted	Rattus norvegicus similar to Map3k7 protein (LOC313121), mRNA [XM_232855]		FALSE
A_44_P999910	0.0203907	0.00040818	-0.293276	-0.677836	-0.90644	-0.168856	0.183968	ENSRNOT00000008115	RGD1306402	Rattus norvegicus similar to RIKEN cDNA 4933435A13 (LOC305583), mRNA [XM_223687]		FALSE
A_44_P1054453	0.018045	7.68156e-05	-0.0246319	1.02455	-0.454117	-0.532349	-0.764755	ENSRNOT00000017373	Uap1l1_predicted	PREDICTED: Rattus norvegicus UDP-N-acteylglucosamine pyrophosphorylase 1-like 1 (predicted) (Uap1l1_predicted), mRNA [XM_216004]		FALSE
A_43_P20777	0.0398218	0.00407256	-0.222629	-0.466623	-0.541892	0.12116	0.318161	ENSRNOT00000023641	Nsun2_predicted	PREDICTED: Rattus norvegicus NOL1 [XM_341474]		FALSE
A_44_P690506	0.043519	0.00493656	-0.0252424	0.279807	0.333638	-0.247793	-0.277232	BE107707	BE107707	UI-R-CA0-aww-a-05-0-UI.s1 UI-R-CA0 Rattus norvegicus cDNA clone UI-R-CA0-aww-a-05-0-UI 3', mRNA sequence [BE107707]	BE107707	FALSE
A_43_P21848	0.0328036	0.00232443	-0.147642	0.145099	0.0143657	0.592649	0.812215	ENSRNOT00000003131	RGD1359201	RGD1359201 protein (Fragment). [Source:Uniprot/SPTREMBL;Acc:Q5HZX2] [ENSRNOT00000003131]		FALSE
A_44_P1037328	0.0338452	0.00258802	-0.0546123	-0.444988	-0.678143	-0.099167	0.00441945	XM_217188	Pias1_predicted	PREDICTED: Rattus norvegicus protein inhibitor of activated STAT 1 (predicted) (Pias1_predicted), mRNA [XM_217188]	XM_217188	FALSE
A_43_P13894	0.0398415	0.00408178	0.465622	-0.123079	-0.426444	0.659411	0.838176	ENSRNOT00000029764	Eea1_predicted	PREDICTED: Rattus norvegicus early endosome antigen 1 (predicted) (Eea1_predicted), mRNA [XM_235064]		FALSE
A_44_P159478	0.018484	0.000179996	0.613384	0.192478	0.417451	1.62143	1.89264	NM_001029910	Pdcd6ip	Rattus norvegicus programmed cell death 6 interacting protein (Pdcd6ip), mRNA [NM_001029910]	NM_001029910	FALSE
A_43_P15415	0.0493829	0.00649677	0.290789	0.0481603	-0.0261523	0.432919	0.535008	NM_134398	P34	Rattus norvegicus p34 protein (P34), mRNA [NM_134398]	NM_134398	FALSE
A_44_P914528	0.0255728	0.00100523	-0.129096	-0.534901	-0.916647	0.0444192	0.0669912	NM_001080151	Ccdc21	Rattus norvegicus coiled-coil domain containing 21 (Ccdc21), mRNA [NM_001080151]	NM_001080151	FALSE
A_44_P261243	0.0283587	0.00149758	-0.0376952	-0.169968	-0.234634	0.584943	0.777693	NM_001013150	Map3k11	Rattus norvegicus mitogen-activated protein kinase kinase kinase 11 (Map3k11), mRNA [NM_001013150]	NM_001013150	FALSE
A_44_P375676	0.0425758	0.00469377	-0.203416	0.335868	0.653206	-0.446581	-0.0752058	BG374711	BG374711	BG374711 UI-R-CV1-bsq-e-05-0-UI.s1 UI-R-CV1 Rattus norvegicus cDNA clone UI-R-CV1-bsq-e-05-0-UI 3', mRNA sequence [BG374711]	BG374711	FALSE
A_44_P164529	0.0482411	0.00620256	0.203699	0.146222	0.467663	-0.126679	0.457971	CB544995	CB544995	CB544995 AMGNNUC:MRMN3-00062-H3-A mrmn3 (10218) Rattus norvegicus cDNA clone mrmn3-00062-h3 5', mRNA sequence [CB544995]	CB544995	FALSE
A_43_P12732	0.0221777	0.000628803	0.204664	-0.419693	-0.725418	0.383885	0.401642	NM_033097	Vps52	Rattus norvegicus vacuolar protein sorting 52 (yeast) (Vps52), mRNA [NM_033097]	NM_033097	FALSE
A_43_P17566	0.0352421	0.00291263	0.0886897	0.267214	0.336713	-0.65786	-0.529903	ENSRNOT00000026688	ENSRNOT00000026688	glycerophosphodiester phosphodiesterase domain containing 3 (predicted) (Gdpd3_predicted), mRNA [Source:RefSeq_dna;Acc:XR_009334] [ENSRNOT00000026688]		FALSE
A_44_P426478	0.0203907	0.000383569	0.0415434	-0.386328	-0.176691	0.369658	0.822848	XM_239603	XM_239603	Rattus norvegicus similar to RIKEN cDNA 1300006M19 (LOC304282), mRNA [XM_239603]	XM_239603	FALSE
A_44_P349250	0.0290421	0.0016537	0.260027	-0.105365	-0.490946	0.00206959	0.0313312	NM_001024898	Paf1	Rattus norvegicus Paf1, RNA polymerase II associated factor, homolog (S. cerevisiae) (Paf1), mRNA [NM_001024898]	NM_001024898	FALSE
A_44_P1057197	0.0397467	0.00405671	-0.221497	-0.151709	0.0495846	0.390385	0.394261	NM_133615	Taf9l	Rattus norvegicus TAF9-like RNA polymerase II, TATA box binding protein (TBP)-associated factor, 31kDa (Taf9l), mRNA [NM_133615]	NM_133615	FALSE
A_44_P187706	0.0182041	9.02489e-05	-0.107791	-0.842278	-0.943825	0.558616	0.611502	XM_001075770	LOC315676	PREDICTED: Rattus norvegicus similar to Dmx-like 2 (LOC315676), mRNA [XM_001075770]	XM_001075770	FALSE
A_44_P792409	0.0350961	0.00288316	-0.0400112	-0.0624565	-0.252931	-0.647781	-0.40345	TC589680	TC589680	Q7X766_ORYSA (Q7X766) Peroxidase , partial (6%) [TC589680]		FALSE
A_43_P20360	0.0469221	0.00582251	-0.195932	-0.272324	-0.353387	0.210412	0.365601	NM_001015015	Usp1	Rattus norvegicus ubiquitin specific peptdiase 1 (Usp1), mRNA [NM_001015015]	NM_001015015	FALSE
A_44_P497744	0.0367868	0.00325761	0.0726608	0.516014	1.1393	-0.44487	-0.213222	BQ204816	BQ204816	BQ204816 UI-R-EP0-cnv-a-13-0-UI.s1 UI-R-EP0 Rattus norvegicus cDNA clone UI-R-EP0-cnv-a-13-0-UI 3', mRNA sequence [BQ204816]	BQ204816	FALSE
A_44_P353505	0.0253431	0.000989271	-0.0911861	-0.121825	-0.449417	-0.324274	-0.323901	NM_201991	Atpbd1c	Rattus norvegicus ATP binding domain 1 family, member C (Atpbd1c), mRNA [NM_201991]	NM_201991	FALSE
A_44_P239650	0.048057	0.00615062	-0.346445	-0.94881	-1.12759	-0.0905838	-0.0262392	BF558456	BF558456	BF558456 UI-R-C1-kz-c-11-0-UI.r1 UI-R-C1 Rattus norvegicus cDNA clone UI-R-C1-kz-c-11-0-UI 5', mRNA sequence [BF558456]	BF558456	FALSE
A_44_P376994	0.018484	0.00018186	0.0319411	-0.0822412	0.0233854	-1.14726	-1.33137	NM_017242	Lsamp	Rattus norvegicus limbic system-associated membrane protein (Lsamp), mRNA [NM_017242]	NM_017242	FALSE
A_44_P518050	0.0359961	0.00312626	-0.142923	-0.494022	-0.512654	0.481542	0.528847	ENSRNOT00000008355	Sf3a1_predicted	PREDICTED: Rattus norvegicus splicing factor 3a, subunit 1 (predicted) (Sf3a1_predicted), mRNA [XM_223566]		FALSE
A_44_P1044830	0.0292143	0.00167797	-0.50502	-0.759264	-0.708042	-0.156066	0.370501	ENSRNOT00000024452	Lactb_predicted	PREDICTED: Rattus norvegicus lactamase, beta (predicted) (Lactb_predicted), mRNA [XM_217181]		FALSE
A_44_P406890	0.0183556	0.000157166	0.425267	-0.396369	-0.546624	1.42734	1.43276	BC099158	BC099158	Rattus norvegicus cDNA clone IMAGE:7381559 [BC099158]	BC099158	FALSE
A_44_P340448	0.0290136	0.00162403	-0.0199934	-0.45573	-0.635874	0.434063	0.464524	NM_001024790	Usp7	Rattus norvegicus ubiquitin specific protease 7 (herpes virus-associated) (Usp7), mRNA [NM_001024790]	NM_001024790	FALSE
A_44_P555638	0.0318839	0.00214226	0.42087	-0.0550123	-0.255939	0.567326	0.686759	NM_001014110	LOC317380	Rattus norvegicus similar to Lmo6 protein (LOC317380), mRNA [NM_001014110]	NM_001014110	FALSE
A_44_P432358	0.0263791	0.00115853	-0.215704	-0.512936	-0.489178	0.57397	1.44056	NM_057105	Ugt1a6	Rattus norvegicus UDP glycosyltransferase 1 family, polypeptide A6 (Ugt1a6), transcript variant 2, mRNA [NM_057105]	NM_057105	FALSE
A_44_P606810	0.0435541	0.00497986	-0.302259	-0.480399	-0.474811	0.00647891	0.118576	TC593084	TC593084	Q52UW0_9BACT (Q52UW0) Formyltransferase/hydrolase complex subunit D (Fragment), partial (7%) [TC593084]		FALSE
A_44_P380792	0.0448814	0.0052618	-0.894729	-0.335582	-0.327427	-1.15429	-1.04109	BF418815	BF418815	BF418815 UI-R-BJ2-bqj-c-09-0-UI.s1 UI-R-BJ2 Rattus norvegicus cDNA clone UI-R-BJ2-bqj-c-09-0-UI 3', mRNA sequence [BF418815]	BF418815	FALSE
A_44_P851321	0.0487473	0.00636614	0.0451298	0.580701	0.00939077	-0.498769	-0.310248	AW920178	AW920178	AW920178 EST351391 Rat gene index, normalized rat, norvegicus, Bento Soares Rattus norvegicus cDNA clone RGIGQ65 5' end, mRNA sequence [AW920178]	AW920178	FALSE
A_42_P624773	0.0126221	1.16831e-05	0.68142	0.327322	0.352157	-0.171468	-0.18687	NM_031766	Cpz	Rattus norvegicus carboxypeptidase Z (Cpz), mRNA [NM_031766]	NM_031766	FALSE
A_44_P425465	0.0228703	0.000730409	-0.114753	-0.32989	-0.66531	-0.0995261	-0.121411	BF289943	BF289943	BF289943 EST454534 Rat Gene Index, normalized rat, Rattus norvegicus cDNA Rattus norvegicus cDNA clone RGIHL87, mRNA sequence [BF289943]	BF289943	FALSE
A_42_P508085	0.018045	7.13877e-05	-0.0166785	-0.250177	-0.583934	-0.736438	-0.765333	NM_001009620	MGC105601	Rattus norvegicus similar to hypothetical protein FLJ20898 (MGC105601), mRNA [NM_001009620]	NM_001009620	FALSE
A_44_P477268	0.0400679	0.00411897	0.0224358	-0.0286446	0.0114101	0.401602	0.646269	XM_340805	Rnf187_predicted	PREDICTED: Rattus norvegicus ring finger protein 187 (predicted) (Rnf187_predicted), mRNA [XM_340805]	XM_340805	FALSE
A_43_P19328	0.018484	0.000232643	-0.298501	-0.191837	-0.246397	0.0620679	0.382557	ENSRNOT00000004002	ENSRNOT00000004002	Rattus norvegicus similar to RIKEN cDNA 2810460C24 (LOC287389), mRNA [XM_213316]		FALSE
A_44_P185411	0.0262056	0.00113071	1.4683	1.00776	0.62344	0.238194	-0.349207	XM_235402	RGD1309461	PREDICTED: Rattus norvegicus similar to KIAA1882 protein (RGD1309461), mRNA [XM_235402]	XM_235402	FALSE
A_42_P659682	0.0316477	0.00211683	-0.0942896	-1.0329	-0.556779	0.80992	1.45038	AW143252	AW143252	AW143252 EST293548 Normalized rat brain, Bento Soares Rattus sp. cDNA clone RGIBG66 5' end, mRNA sequence [AW143252]	AW143252	FALSE
A_44_P174682	0.0400679	0.00412255	0.0305394	-0.221038	-0.145036	0.426502	0.787104	NM_012866	Nfyc	Rattus norvegicus nuclear transcription factor-Y gamma (Nfyc), mRNA [NM_012866]	NM_012866	FALSE
A_42_P519868	0.0368896	0.0032769	-0.222059	-0.0460424	-0.0417554	0.245089	0.558906	NM_053906	Gsr	Rattus norvegicus glutathione reductase (Gsr), mRNA [NM_053906]	NM_053906	FALSE
A_44_P182336	0.0278775	0.00144055	-0.296132	-0.524638	-1.00169	0.29661	0.419456	NM_001002854	Tanc1	Rattus norvegicus tetratricopeptide repeat, ankyrin repeat and coiled-coil containing 1 (Tanc1), mRNA [NM_001002854]	NM_001002854	FALSE
A_43_P10326	0.0346132	0.00279628	-0.177005	-0.259794	-0.4582	-0.648785	-0.473528	CF110545	CF110545	Shultzomica03796 Rat lung airway and parenchyma cDNA libraries Rattus norvegicus cDNA clone Contig3365 5', mRNA sequence [CF110545]	CF110545	FALSE
A_42_P466272	0.0490449	0.0064248	-0.273609	-0.357287	-0.639965	-1.09917	-0.924999	NM_031087	Psen2	Rattus norvegicus presenilin 2 (Psen2), mRNA [NM_031087]	NM_031087	FALSE
A_44_P561254	0.0270761	0.00128249	0.0428454	-0.29102	-0.288992	0.475462	0.45508	ENSRNOT00000024895	RGD1309922_predicted	PREDICTED: Rattus norvegicus similar to 2610301G19Rik protein (predicted) (RGD1309922_predicted), mRNA [XM_224329]		FALSE
A_44_P1028017	0.0442777	0.00512946	-0.299166	-0.0361896	-0.202464	-0.956165	-0.758899	NM_019907	Cript	Rattus norvegicus postsynaptic protein Cript (Cript), mRNA [NM_019907]	NM_019907	FALSE
A_44_P1046976	0.04155	0.00445316	0.628459	-0.0547218	-0.51623	0.305466	0.442732	ENSRNOT00000027268	ENSRNOT00000027268	PREDICTED: Rattus norvegicus regulator of nonsense transcripts 1 (predicted) (Rent1_predicted), mRNA [XM_224732]		FALSE
A_44_P220305	0.0370388	0.00332379	-0.071937	-0.573149	-0.863565	-0.0817152	-0.029807	XR_005959	LOC499894	PREDICTED: Rattus norvegicus similar to heterogeneous nuclear ribonucleoprotein A2/B1 isoform 2 (LOC499894), mRNA [XR_005959]	XR_005959	FALSE
A_44_P1020134	0.0331561	0.00239541	0.134024	-0.261144	-0.362194	0.597192	0.600047	NM_001025036	LOC499339	Rattus norvegicus hypothetical protein LOC499339 (LOC499339), mRNA [NM_001025036]	NM_001025036	FALSE
A_44_P593898	0.0303533	0.00189541	0.267699	-0.180816	-0.119468	0.940262	1.14631	XM_001058609	LOC680731	PREDICTED: Rattus norvegicus hypothetical protein LOC680731 (LOC680731), mRNA [XM_001058609]	XM_001058609	FALSE
A_44_P415880	0.0294903	0.0017373	0.418512	0.429019	0.359864	-0.631988	-0.193542	NM_001014201	Cd320	Rattus norvegicus CD320 antigen (Cd320), mRNA [NM_001014201]	NM_001014201	FALSE
A_44_P373660	0.0175169	5.01778e-05	0.374722	0.51429	-0.227656	-1.41334	-1.03733	AI408440	AI408440	AI408440 EST236730 Normalized rat ovary, Bento Soares Rattus sp. cDNA clone ROVEO24 3' end, mRNA sequence [AI408440]	AI408440	FALSE
A_44_P281761	0.0497411	0.00659355	0.376672	-0.284339	-0.373425	0.314193	0.208918	NM_012554	Eno1	Rattus norvegicus enolase 1, alpha (Eno1), mRNA [NM_012554]	NM_012554	FALSE
A_44_P421157	0.0391508	0.00387518	-0.00428021	-0.467569	-1.07377	0.833673	0.66332	CK357683	CK357683	AGENCOURT_17184061 NIH_MGC_233 Rattus norvegicus cDNA clone IMAGE:7105011 5', mRNA sequence [CK357683]	CK357683	FALSE
A_44_P791953	0.0368896	0.00327682	0.264416	-0.0814054	-0.208937	0.222595	0.622342	TC586289	TC586289	Q5Z5K6_ORYSA (Q5Z5K6) Zinc finger-like, partial (3%) [TC586289]		FALSE
A_44_P884739	0.0207852	0.000467847	0.33808	0.78988	0.826228	-0.985923	-0.586074	ENSRNOT00000037405	Sez6l2_predicted	PREDICTED: Rattus norvegicus seizure related 6 homolog (mouse)-like 2 (predicted) (Sez6l2_predicted), mRNA [XM_219339]		FALSE
A_43_P21690	0.0240433	0.000843338	0.669404	0.488232	0.0730296	0.56991	0.687985	ENSRNOT00000002150	Usp25_predicted	PREDICTED: Rattus norvegicus ubiquitin specific protease 25 (predicted) (Usp25_predicted), mRNA [XM_221722]		FALSE
A_44_P1013157	0.0394778	0.00399365	0.909749	0.359196	0.100417	1.16964	1.3045	ENSRNOT00000058098	RGD1309634_predicted			FALSE
A_44_P656317	0.018484	0.000225753	-0.484404	-1.36475	-1.05068	-0.186893	0.000116825	TC603736	TC603736			FALSE
A_44_P189292	0.0263791	0.0011498	0.215432	0.201014	-0.424634	0.558526	0.774229	NM_145671	Klhl17	Rattus norvegicus kelch-like 17 (Drosophila) (Klhl17), mRNA [NM_145671]	NM_145671	FALSE
A_43_P10213	0.0497411	0.00658945	0.0465747	-0.598698	-0.762065	0.212742	0.607025	XM_232515	Etnk1_predicted	PREDICTED: Rattus norvegicus ethanolamine kinase 1 (predicted) (Etnk1_predicted), mRNA [XM_232515]	XM_232515	FALSE
A_42_P618538	0.0469285	0.00583434	-0.0193719	-0.287039	-0.679306	0.231398	-0.027059	NM_001030031	Lta4h	Rattus norvegicus leukotriene A4 hydrolase (Lta4h), mRNA [NM_001030031]	NM_001030031	FALSE
A_44_P576312	0.0270584	0.00126694	-0.349324	-1.26797	-1.3804	0.116195	0.165552	TC598873	TC598873	APC_RAT (P70478) Adenomatous polyposis coli protein (Protein APC), partial (4%) [TC598873]		FALSE
A_44_P802511	0.0421593	0.00458213	0.43437	0.319144	0.284466	1.29958	1.463	XM_001065176	RGD1566319_predicted	PREDICTED: Rattus norvegicus similar to Sestrin 2 (Hi95) (predicted), transcript variant 1 (RGD1566319_predicted), mRNA [XM_001065176]	XM_001065176	FALSE
A_44_P846589	0.0464234	0.00566029	-0.11179	-0.562779	-0.855788	-0.405833	0.0679439	NM_022229	Hspd1	Rattus norvegicus heat shock protein 1 (chaperonin) (Hspd1), mRNA [NM_022229]	NM_022229	FALSE
A_42_P460785	0.0445574	0.00519225	0.065002	-0.00241947	-0.41691	-1.98783	-1.7367	NM_012816	Amacr	Rattus norvegicus alpha-methylacyl-CoA racemase (Amacr), mRNA [NM_012816]	NM_012816	FALSE
A_44_P231448	0.0332498	0.00241921	0.0307111	0.6604	0.718136	-0.357911	-0.0898547	ENSRNOT00000000449	ENSRNOT00000000449	Profilaggrin (Fragment). [Source:Uniprot/SPTREMBL;Acc:Q8CIU0] [ENSRNOT00000000449]		FALSE
A_44_P367438	0.0179267	5.84624e-05	-0.291447	-0.476078	-0.478777	0.0548874	0.335098	NM_001015025	Stk38	Rattus norvegicus serine/threonine kinase 38 (Stk38), mRNA [NM_001015025]	NM_001015025	FALSE
A_44_P180334	0.0274974	0.00135359	-0.0630593	0.250326	0.0598192	-0.721397	-0.533905	ENSRNOT00000043897	RGD1562510_predicted	PREDICTED: Rattus norvegicus similar to H3 histone, family 3B (predicted) (RGD1562510_predicted), mRNA [XM_223924]		FALSE
A_44_P319208	0.018484	0.000222154	0.0476618	-0.258126	-0.328586	0.80347	0.873851	ENSRNOT00000025873	Dpp8_predicted	PREDICTED: Rattus norvegicus dipeptidylpeptidase 8 (predicted) (Dpp8_predicted), mRNA [XM_236345]		FALSE
A_44_P128902	0.018117	7.96112e-05	0.412579	0.288631	0.0105544	-0.221657	-0.0523609	ENSRNOT00000004314	LOC497867	LOC497867 protein (Fragment). [Source:Uniprot/SPTREMBL;Acc:Q3B8R8] [ENSRNOT00000004314]		FALSE
A_44_P294961	0.0207852	0.000474727	0.398824	0.0572458	-0.25572	0.328892	0.40853	NM_139043	Exoc8	Rattus norvegicus exocyst complex component 8 (Exoc8), mRNA [NM_139043]	NM_139043	FALSE
A_44_P900001	0.0394778	0.00399235	-0.0937582	-0.455855	-0.951359	-0.457373	-0.390759	XM_001079166	Arhgef15_predicted	PREDICTED: Rattus norvegicus Rho guanine nucleotide exchange factor (GEF) 15 (predicted) (Arhgef15_predicted), mRNA [XM_001079166]	XM_001079166	FALSE
A_44_P442838	0.020908	0.000521053	-0.0320385	0.402122	0.65281	-0.514529	-0.400241	AF216218	AF216218	AF216218 Rattus norvegicus orphanin FQ receptor gene (OFQR), complete cds, alternatively spliced [AF216218]	AF216218	FALSE
A_44_P395978	0.0378336	0.00352035	-0.0420171	-0.206473	-0.452603	-0.66263	-0.570414	ENSRNOT00000022069	Ndnl2	Ndnl2 protein (Fragment). [Source:Uniprot/SPTREMBL;Acc:Q4KM72] [ENSRNOT00000022069]		FALSE
A_42_P821581	0.031056	0.0020122	0.248864	0.25159	0.298105	-0.884571	-0.448579	XM_236746	XM_236746	Rattus norvegicus similar to tetranectin (LOC316099), mRNA [XM_236746]	XM_236746	FALSE
A_44_P362257	0.0147528	1.50927e-05	1.27386	1.4551	0.485909	-1.23276	-0.938908	AW142827	AW142827	AW142827 EST293081 Normalized rat brain, Bento Soares Rattus sp. cDNA clone RGIAW45 5' end, mRNA sequence [AW142827]	AW142827	FALSE
A_44_P226928	0.0216274	0.000559196	0.0396169	0.0403509	0.40329	0.0544333	-0.249933	NM_022940	Pdzk3	Rattus norvegicus PDZ domain containing 3 (Pdzk3), mRNA [NM_022940]	NM_022940	FALSE
A_44_P699869	0.018484	0.000201069	-0.430333	-0.6016	-0.525792	0.248055	0.503057	CO558803	CO558803	AGENCOURT_28538656 NIH_MGC_249 Rattus norvegicus cDNA clone IMAGE:7375448 5', mRNA sequence [CO558803]	CO558803	FALSE
A_44_P325808	0.0169896	3.63697e-05	0.102515	-0.210931	-0.277039	0.851222	0.865471	NM_145081	Optn	Rattus norvegicus optineurin (Optn), mRNA [NM_145081]	NM_145081	FALSE
A_42_P539352	0.0375279	0.00343156	0.0538861	-0.151715	0.00745976	0.710833	0.930942	NM_031708	Adrm1	Rattus norvegicus adhesion regulating molecule 1 (Adrm1), mRNA [NM_031708]	NM_031708	FALSE
A_44_P765923	0.0363341	0.00318756	1.23134	0.442449	0.220278	-0.830683	-0.208908	TC618510	TC618510			FALSE
A_44_P792621	0.034168	0.00267824	-0.0176054	-0.27829	-0.370476	0.0995406	0.519818	ENSRNOT00000004519	Tmem63a_predicted	PREDICTED: Rattus norvegicus transmembrane protein 63a (predicted) (Tmem63a_predicted), mRNA [XM_223000]		FALSE
A_44_P575816	0.0407758	0.00428341	-0.0308298	0.915741	1.30462	-0.520102	-0.651101	ENSRNOT00000051707	ENSRNOT00000051707	PREDICTED: Rattus norvegicus RGD1562877 (predicted) (RGD1562877_predicted), mRNA [XM_216073]		FALSE
A_42_P739322	0.0356385	0.00304525	-0.140466	-0.528805	-0.480641	0.172402	0.243792	NM_053347	Nde1	Rattus norvegicus nuclear distribution gene E homolog 1 (A nidulans) (Nde1), mRNA [NM_053347]	NM_053347	FALSE
A_44_P354124	0.0222025	0.000661448	0.168864	-0.00657582	-0.301693	-0.383103	-0.303883	XM_001060811	LOC682926	PREDICTED: Rattus norvegicus similar to chromatin modifying protein 1B (LOC682926), mRNA [XM_001060811]	XM_001060811	FALSE
A_44_P307964	0.039234	0.00389081	-0.23704	-0.0751786	-0.464481	-1.20582	-0.611409	NM_001014259	Polr3k	Rattus norvegicus polymerase (RNA) III (DNA directed) polypeptide K (Polr3k), mRNA [NM_001014259]	NM_001014259	FALSE
A_44_P614105	0.0375589	0.00343833	-0.734316	-0.135063	-0.396903	-1.63306	-1.64992	CK840665	CK840665	UI-R-C0-ig-b-07-0-UI.s10 UI-R-C0 Rattus norvegicus cDNA clone UI-R-C0-ig-b-07-0-UI 3', mRNA sequence [CK840665]	CK840665	FALSE
A_44_P974940	0.0400433	0.0041083	0.537484	0.169491	-0.468968	-1.59109	-1.28777	ENSRNOT00000061896	RGD1562392_predicted	PREDICTED: Rattus norvegicus similar to Sulfotransferase K1 (rSULT1C2) (predicted) (RGD1562392_predicted), mRNA [XM_346007]		FALSE
A_44_P410192	0.0256092	0.00101658	0.111993	0.0962852	-0.0998741	-0.611978	-0.731128	ENSRNOT00000012510	Hars2_predicted	PREDICTED: Rattus norvegicus histidyl tRNA synthetase 2 (predicted) (Hars2_predicted), mRNA [XM_342532]		FALSE
A_44_P515754	0.0447772	0.00523314	0.228638	1.20986	1.72584	-0.0505338	-0.0164638	DN937865	Defb50	AGENCOURT_49984713 NCI_CGAP_Pr50 Rattus norvegicus cDNA clone IMAGE:7939010 5', mRNA sequence [DN937865]	DN937865	FALSE
A_44_P395538	0.0206599	0.000458983	-0.0766169	-0.303113	-0.606985	-0.444906	-0.419875	NM_030585	Rabep2	Rattus norvegicus rabaptin, RAB GTPase binding effector protein 2 (Rabep2), mRNA [NM_030585]	NM_030585	FALSE
A_44_P496721	0.0383687	0.00366733	0.21885	-0.0840511	-0.0436008	0.419355	0.443253	XM_218822	RGD1560277_predicted	PREDICTED: Rattus norvegicus similar to RIKEN cDNA D330012F22 gene (predicted) (RGD1560277_predicted), mRNA [XM_218822]	XM_218822	FALSE
A_44_P308877	0.0375589	0.00343749	-0.440639	-0.480735	-0.581337	0.345151	0.108349	NM_001005244	Dmd	Rattus norvegicus dystrophin, muscular dystrophy (Dmd), transcript variant Dp71ab, mRNA [NM_001005244]	NM_001005244	FALSE
A_43_P19742	0.0437769	0.00503115	-0.0504646	0.801267	0.141756	-1.85275	-1.37144	ENSRNOT00000059326	ENSRNOT00000059326	RIKEN cDNA 1700008G05 gene [Source:MarkerSymbol;Acc:MGI:1922747] [ENSRNOT00000059326]		FALSE
A_43_P18145	0.0408365	0.0043011	0.0205853	-0.194056	-0.368738	0.0675843	0.199758	XR_007342	RGD1308489_predicted	PREDICTED: Rattus norvegicus similar to hypothetical protein (predicted) (RGD1308489_predicted), mRNA [XR_007342]	XR_007342	FALSE
A_44_P475363	0.0183556	0.000157722	0.00616229	-0.443394	-1.01977	0.267908	0.336475	NM_022244	Arhgap17	Rattus norvegicus Rho GTPase activating protein 17 (Arhgap17), mRNA [NM_022244]	NM_022244	FALSE
A_44_P556586	0.0370388	0.00332087	0.0777097	0.284004	0.0670123	-0.606764	-0.457828	BC086580	H3f3b	Rattus norvegicus H3 histone, family 3B, mRNA (cDNA clone MGC:105789 IMAGE:7307209), complete cds. [BC086580]	BC086580	FALSE
A_44_P315022	0.018117	8.20812e-05	-0.334158	-0.657331	-0.79059	-0.148777	-0.0648648	NM_001025275	Rad23b	Rattus norvegicus RAD23b homolog (S. cerevisiae) (Rad23b), mRNA [NM_001025275]	NM_001025275	FALSE
A_44_P377432	0.018484	0.000196371	0.96621	1.64353	0.895556	-2.60075	-2.59557	ENSRNOT00000039652	RGD1562101_predicted	PREDICTED: Rattus norvegicus similar to very large G-protein coupled receptor 1 (LOC362068), mRNA [XM_001056150]		FALSE
A_44_P459554	0.0445856	0.0051977	-0.214217	-0.363485	-0.608776	0.109166	0.172317	NM_001014055	RGD1309682	Rattus norvegicus similar to hypothetical protein FLJ14803 (RGD1309682), mRNA [NM_001014055]	NM_001014055	FALSE
A_44_P205887	0.0421373	0.00457153	0.230916	-0.0679001	-0.0148119	0.352347	0.568811	NM_053589	Rab14	Rattus norvegicus RAB14, member RAS oncogene family (Rab14), mRNA [NM_053589]	NM_053589	FALSE
A_44_P442867	0.0218785	0.00058455	-0.3107	-0.463164	-0.531468	-0.0358979	0.0771958	NM_053739	Becn1	Rattus norvegicus beclin 1 (coiled-coil, myosin-like BCL2-interacting protein) (Becn1), transcript variant 1, mRNA [NM_053739]	NM_053739	FALSE
A_44_P313975	0.0307485	0.00195109	0.658744	0.077801	0.296096	0.887232	1.08926	XR_009251	RGD1564433_predicted	PREDICTED: Rattus norvegicus similar to glyceraldehyde-3-phosphate dehydrogenase (phosphorylating) (EC 1.2.1.12) (predicted) (RGD1564433_predicted), mRNA [XR_009251]	XR_009251	FALSE
A_44_P111118	0.0240746	0.000845607	-0.28882	-0.364416	-0.214191	0.229255	0.468846	AW920965	AW920965	AW920965 EST352269 Rat gene index, normalized rat, norvegicus, Bento Soares Rattus norvegicus cDNA clone RGIHK42 5' end, mRNA sequence [AW920965]	AW920965	FALSE
A_44_P558607	0.0464877	0.00568895	-0.485656	-0.678483	-0.840487	-0.0793756	0.0670394	NM_001025011	RGD1305464	Rattus norvegicus similar to DKFZP434H132 protein (RGD1305464), mRNA [NM_001025011]	NM_001025011	FALSE
A_44_P829145	0.0286631	0.00156072	-0.210408	-0.750699	-0.390309	0.457662	1.10601	DV724669	DV724669	RVL16744 Wackym-Soares normalized rat vestibular cDNA library Rattus norvegicus cDNA 5', mRNA sequence [DV724669]	DV724669	FALSE
A_44_P175864	0.0396186	0.00402822	0.0782933	-0.140823	-0.278718	0.263823	0.377357	ENSRNOT00000019587	Trit1_predicted	PREDICTED: Rattus norvegicus tRNA isopentenyltransferase 1 (predicted) (Trit1_predicted), mRNA [XM_342905]		FALSE
A_44_P521687	0.0241953	0.000856918	-0.311194	-0.395631	-0.421626	-0.137155	0.0645438	NM_032079	Dnaja2	Rattus norvegicus DnaJ (Hsp40) homolog, subfamily A, member 2 (Dnaja2), mRNA [NM_032079]	NM_032079	FALSE
A_42_P658562	0.0230663	0.00074277	-0.106773	-0.307201	-0.287444	0.374831	0.449844	ENSRNOT00000016980	RGD1304711_predicted	PREDICTED: Rattus norvegicus similar to RIKEN cDNA 4921521J11 (predicted) (RGD1304711_predicted), mRNA [XM_214334]		FALSE
A_44_P328717	0.0435541	0.00495169	0.0557606	-0.195652	-0.127186	0.217098	0.511388	NM_001013047	Mtm1	Rattus norvegicus X-linked myotubular myopathy gene 1 (Mtm1), mRNA [NM_001013047]	NM_001013047	FALSE
A_44_P501827	0.025034	0.000956142	-0.589889	-1.00225	-1.16271	0.116118	0.209614	XM_216893	Cpsf6_predicted	PREDICTED: Rattus norvegicus cleavage and polyadenylation specific factor 6, 68kDa (predicted) (Cpsf6_predicted), mRNA [XM_216893]	XM_216893	FALSE
A_44_P284642	0.0382971	0.00365116	0.0446187	-0.126499	-0.402789	-0.505275	-0.758622	NM_001024866	RGD1311732	Rattus norvegicus similar to hypothetical protein MGC15407 (RGD1311732), mRNA [NM_001024866]	NM_001024866	FALSE
A_44_P479216	0.0343996	0.00272288	0.456083	-0.117603	-0.695071	0.121243	0.103186	AA943794	AA943794	AA943794 EST199293 Normalized rat brain, Bento Soares Rattus sp. cDNA clone RBRAP76 3' end, mRNA sequence [AA943794]	AA943794	FALSE
A_44_P384425	0.0271376	0.00129659	0.237959	-0.0918785	-0.433471	-0.0426723	0.251863	XM_219796	Ranbp6_predicted	PREDICTED: Rattus norvegicus RAN binding protein 6 (predicted) (Ranbp6_predicted), mRNA [XM_219796]	XM_219796	FALSE
A_42_P632328	0.0308327	0.0019722	-0.210069	-0.641087	-1.01697	-0.448338	-0.472194	ENSRNOT00000003556	Kctd3	PREDICTED: Rattus norvegicus potassium channel tetramerisation domain containing 3 (Kctd3), mRNA [XM_223057]		FALSE
A_44_P971500	0.0497411	0.00658443	-0.572921	-0.455795	-0.653957	-0.122158	0.00257075	ENSRNOT00000059863	Ivns1abp_predicted	influenza virus NS1A binding protein [Source:RefSeq_peptide;Acc:NP_001040550] [ENSRNOT00000059863]		FALSE
A_44_P358336	0.0216955	0.000571035	0.344715	0.111724	0.0687448	0.478052	0.796229	NM_001005560	Pla2g6	Rattus norvegicus phospholipase A2, group VI (Pla2g6), mRNA [NM_001005560]	NM_001005560	FALSE
A_44_P269930	0.0378161	0.00350214	-0.442375	-1.22819	-1.10327	0.183235	0.035831	ENSRNOT00000019080	RGD1310174_predicted	PREDICTED: Rattus norvegicus hypothetical LOC298504 (predicted) (RGD1310174_predicted), mRNA [XM_216525]		FALSE
A_44_P459338	0.0461066	0.00559966	0.583046	-0.0689792	0.162444	0.77037	1.1443	NM_184050	Fxna	Rattus norvegicus putative aminopeptidase Fxna (Fxna), mRNA [NM_184050]	NM_184050	FALSE
A_42_P661837	0.0474627	0.00598253	-0.202006	-0.529015	-0.790038	-0.0329152	-0.18251	NM_053797	Crnkl1	Rattus norvegicus Crn, crooked neck-like 1 (Drosophila) (Crnkl1), mRNA [NM_053797]	NM_053797	FALSE
A_44_P243279	0.0266542	0.00121185	0.105313	-0.056087	0.0897619	0.579893	0.728758	ENSRNOT00000015665	Parvb_predicted	PREDICTED: Rattus norvegicus parvin, beta (predicted) (Parvb_predicted), mRNA [XM_343303]		FALSE
A_44_P760998	0.0346132	0.00279001	0.293327	-0.0753602	0.0358788	0.475394	1.10403	XM_575333	RGD1562135_predicted	PREDICTED: Rattus norvegicus RGD1562135 (predicted) (RGD1562135_predicted), mRNA [XM_575333]	XM_575333	FALSE
A_44_P293008	0.0182041	0.000148827	0.0006634	-0.241607	-0.481877	-0.38421	-0.462169	ENSRNOT00000018689	Ing1l_predicted	PREDICTED: Rattus norvegicus inhibitor of growth family, member 1-like (predicted) (Ing1l_predicted), mRNA [XM_214344]		FALSE
A_44_P171203	0.0292706	0.00169074	0.367092	0.426178	0.149541	-2.11888	-2.27446	ENSRNOT00000038074	Nubpl_predicted	PREDICTED: Rattus norvegicus nucleotide binding protein-like (predicted) (Nubpl_predicted), mRNA [XM_216689]		FALSE
A_44_P234309	0.0346132	0.00278103	-0.383562	-0.603863	-1.05713	0.127277	-0.0952594	ENSRNOT00000024568	Smarca5_predicted	PREDICTED: Rattus norvegicus SWI [XM_226380]		FALSE
A_42_P837576	0.0263791	0.00116684	-0.456222	-0.395895	-0.589871	-0.906593	-1.0149	AA900054	AA900054	UI-R-E0-da-e-08-0-UI.s1 UI-R-E0 Rattus norvegicus cDNA clone UI-R-E0-da-e-08-0-UI 3' similar to gi [AA900054]	AA900054	FALSE
A_44_P578267	0.0392673	0.00391774	1.09212	-0.0357043	-0.548621	-0.590667	-1.07441	TC604845	TC604845			FALSE
A_44_P297100	0.0462373	0.00562545	0.658001	0.17935	-0.00459957	0.568986	0.550604	ENSRNOT00000023304	LOC499022	Quaking protein. [Source:Uniprot/SWISSPROT;Acc:Q91XU1] [ENSRNOT00000023304]		FALSE
A_44_P292010	0.0220906	0.00062418	-0.589117	-0.220739	-0.191401	-1.50441	-1.22012	AA997941	AA997941	AA997941 UI-R-C0-ht-d-02-0-UI.s1 UI-R-C0 Rattus norvegicus cDNA clone UI-R-C0-ht-d-02-0-UI 3', mRNA sequence [AA997941]	AA997941	FALSE
A_43_P15111	0.0293312	0.00170079	0.0150036	-0.350922	-0.985251	-0.6734	-0.800583	XM_215038	Tmem9b_predicted	PREDICTED: Rattus norvegicus TMEM9 domain family, member B (predicted) (Tmem9b_predicted), mRNA [XM_215038]	XM_215038	FALSE
A_44_P494130	0.0312191	0.00204102	-0.0332035	-0.424686	-0.606703	0.486189	0.250127	ENSRNOT00000036838	Nfkb1	Nuclear factor NF-kappa-B p105 subunit (DNA-binding factor KBF1) (EBP- 1) [Contains: Nuclear factor NF-kappa-B p50 subunit] (Fragment). [Source:Uniprot/SWISSPROT;Acc:Q63369] [ENSRNOT00000036838]		FALSE
A_44_P239009	0.0344951	0.00276094	0.569756	0.107715	0.380033	1.72859	1.79672	ENSRNOT00000014780	Gars	Gars protein (Fragment). [Source:Uniprot/SPTREMBL;Acc:Q5I0G4] [ENSRNOT00000014780]		FALSE
A_44_P331464	0.0169258	2.84072e-05	-0.595893	-0.517805	0.284766	0.722751	1.03761	NM_172038	Gstm5	Rattus norvegicus glutathione S-transferase, mu 5 (Gstm5), mRNA [NM_172038]	NM_172038	FALSE
A_44_P481086	0.0200915	0.000360193	0.0651804	-0.649822	-0.505325	0.486257	0.5328	NM_001024801	Zw10	Rattus norvegicus ZW10 homolog, centromere/kinetochore protein (Drosophila) (Zw10), mRNA [NM_001024801]	NM_001024801	FALSE
A_44_P745393	0.0196408	0.00030861	-0.0191265	-0.46442	-0.721138	0.282613	0.268648	ENSRNOT00000023274	ENSRNOT00000023274	BC052920 Cdc2l1 protein {Mus musculus} (exp=-1; wgp=0; cg=0), partial (81%) [TC583248]		FALSE
A_44_P208324	0.0456974	0.00548761	0.306088	-0.139457	-0.305892	-0.0738445	0.0347821	NM_031090	Rab1	Rattus norvegicus RAB1, member RAS oncogene family (Rab1), mRNA [NM_031090]	NM_031090	FALSE
A_44_P792093	0.040705	0.00425551	0.0285352	-0.280567	-0.819838	-0.42564	-0.40631	TC592940	TC592940			FALSE
A_42_P670631	0.0203907	0.000400535	0.384228	0.619308	0.660537	-1.01789	-0.840472	ENSRNOT00000036990	RGD1305645_predicted	PREDICTED: Rattus norvegicus similar to RIKEN cDNA 1500015O10 (predicted) (RGD1305645_predicted), mRNA [XM_343562]		FALSE
A_44_P792797	0.026686	0.00121814	-0.0376305	1.1327	0.97858	-0.866587	-0.614854	TC598831	TC598831	Q8TBY9_HUMAN (Q8TBY9) WD repeat domain 66, partial (3%) [TC598831]		FALSE
A_44_P1053587	0.0484148	0.00627621	-0.140644	-0.489709	-0.3968	0.235591	0.405004	XM_216633	Mta3_predicted	Rattus norvegicus similar to Mta3 protein (LOC298763), mRNA [XM_216633]	XM_216633	FALSE
A_44_P304349	0.0231147	0.000771289	-0.152126	-0.496217	-0.588654	0.0779358	0.105806	ENSRNOT00000021149	RGD1560341_predicted	PREDICTED: Rattus norvegicus similar to Methionine aminopeptidase 2 (MetAP 2) (predicted) (RGD1560341_predicted), mRNA [XM_574154]		FALSE
A_44_P509771	0.043006	0.00480577	0.0727256	0.0792465	-0.053934	-0.614611	-0.479263	AI009594	AI009594	AI009594 EST204045 Normalized rat lung, Bento Soares Rattus sp. cDNA clone RLUBG07 3' end, mRNA sequence [AI009594]	AI009594	FALSE
A_42_P545928	0.040428	0.00420686	0.0818423	-0.466936	-0.592534	0.0622251	0.51882	NM_153730	Klhl12	Rattus norvegicus kelch-like 12 (Drosophila) (Klhl12), mRNA [NM_153730]	NM_153730	FALSE
A_44_P466271	0.018484	0.000187947	0.102128	-0.339122	-0.415911	0.314562	0.447775	NM_001012066	Sphk2	Rattus norvegicus sphingosine kinase 2 (Sphk2), mRNA [NM_001012066]	NM_001012066	FALSE
A_44_P339806	0.0338452	0.00258282	-0.173637	-0.304737	-0.427097	0.233237	0.417648	NM_138976	Mfn1	Rattus norvegicus mitofusin 1 (Mfn1), mRNA [NM_138976]	NM_138976	FALSE
A_44_P776350	0.0256094	0.00106046	0.238482	-0.076008	-0.45494	0.664244	0.754372	TC586471	TC586471			FALSE
A_44_P250319	0.0396186	0.00402999	8.66651e-05	-0.413988	-0.656708	0.254485	0.143256	ENSRNOT00000031045	Npepps	Npepps protein (Fragment). [Source:Uniprot/SPTREMBL;Acc:Q3B8Q9] [ENSRNOT00000031045]		FALSE
A_43_P21536	0.0204026	0.000425358	0.14238	-0.464626	-0.820408	0.770152	1.06831	ENSRNOT00000014783	RGD1305534_predicted	Rattus norvegicus similar to dJ202D23.2 (novel protein similar to C21ORF5 (KIAA0933)) (LOC315864), mRNA [XM_236449]		FALSE
A_43_P19054	0.0408365	0.00429619	-0.340001	-0.968387	-0.502856	0.399027	0.506802	NM_001033688	Dsc2	Rattus norvegicus desmocollin 2 (Dsc2), mRNA [NM_001033688]	NM_001033688	FALSE
A_44_P196172	0.0349475	0.00285732	0.0771157	0.230618	-1.10704	-0.181122	-0.645089	NM_138881	Best5	Rattus norvegicus Best5 protein (Best5), mRNA [NM_138881]	NM_138881	FALSE
A_44_P1046554	0.0231147	0.000772805	-0.0793103	-0.372183	-0.484765	0.3446	0.355507	NM_053747	Ubqln1	Rattus norvegicus ubiquilin 1 (Ubqln1), mRNA [NM_053747]	NM_053747	FALSE
A_44_P119624	0.0366551	0.00323072	-0.176021	-0.0836759	-0.364812	-0.922099	-0.762897	ENSRNOT00000006006	RGD1306925	trafficking protein particle complex protein 2 [Source:RefSeq_peptide;Acc:NP_001020136] [ENSRNOT00000006006]		FALSE
A_44_P393953	0.0375589	0.00343989	0.527781	-0.000489652	-0.0421936	0.420867	0.643097	ENSRNOT00000058934	LOC686799	PREDICTED: Rattus norvegicus similar to WD repeat domain 59 (LOC690751), mRNA [XR_006941]		FALSE
A_44_P184567	0.0482849	0.00621792	0.437601	1.05187	1.32291	0.00860906	-0.0704794	NM_001002291	Olr1384	Rattus norvegicus olfactory receptor gene Olr1384 (Olr1384), mRNA [NM_001002291]	NM_001002291	FALSE
A_42_P773604	0.0196408	0.000307531	-0.0138546	0.0116357	-0.328463	0.489573	0.452403	NM_031578	Tesk1	Rattus norvegicus testis specific protein kinase 1 (Tesk1), mRNA [NM_031578]	NM_031578	FALSE
A_44_P153070	0.020908	0.000517368	-0.922559	-0.609585	-0.934275	-2.04945	-2.305	AA943842	AA943842	AA943842 EST199341 Normalized rat brain, Bento Soares Rattus sp. cDNA clone RBRAQ36 3' end, mRNA sequence [AA943842]	AA943842	FALSE
A_44_P341428	0.0331771	0.00239854	0.0419773	-0.454158	-0.70885	0.0853993	0.0957421	NM_001008291	Tfip11	Rattus norvegicus tuftelin interacting protein 11 (Tfip11), mRNA [NM_001008291]	NM_001008291	FALSE
A_44_P279296	0.0187873	0.00025152	-0.194967	-0.63544	-0.305415	0.670068	0.916482	ENSRNOT00000013265	RGD1562949_predicted	Rattus norvegicus similar to RIKEN cDNA 2810429C13 (LOC315969), mRNA [XM_236578]		FALSE
A_44_P330168	0.0115275	9.94035e-06	-0.485987	-0.825506	-0.743925	0.223354	0.315208	NM_053655	Dnm1l	Rattus norvegicus dynamin 1-like (Dnm1l), mRNA [NM_053655]	NM_053655	FALSE
A_44_P413821	0.0173418	4.08291e-05	0.0889773	0.150967	-0.191965	-1.74374	-1.40338	AA956104	AA956104	AA956104 UI-R-E1-fi-e-03-0-UI.s1 UI-R-E1 Rattus norvegicus cDNA clone UI-R-E1-fi-e-03-0-UI 3' similar to gi [AA956104]	AA956104	FALSE
A_42_P508185	0.0274974	0.00135667	-0.289942	-0.326571	-0.882597	-0.686899	-1.03399	NM_145680	Gimap5	Rattus norvegicus GTPase, IMAP family member 5 (Gimap5), transcript variant 2, mRNA [NM_145680]	NM_145680	FALSE
A_44_P114892	0.0435541	0.0049768	0.424122	-0.0626705	0.203652	0.698895	0.849798	XR_006874	LOC287625	PREDICTED: Rattus norvegicus similar to Glyceraldehyde-3-phosphate dehydrogenase (GAPDH) (LOC287625), mRNA [XR_006874]	XR_006874	FALSE
A_44_P558652	0.0276957	0.00140275	0.0303135	-0.250899	-0.280745	0.729384	0.750285	NM_001079892	RGD1565983_predicted	Rattus norvegicus similar to apurinic/apyrimidinic endonuclease 2 (predicted) (RGD1565983_predicted), mRNA [NM_001079892]	NM_001079892	FALSE
A_44_P288809	0.0332498	0.002417	0.0265557	-0.179155	-0.211215	0.153954	0.18421	BC098800	Wdr24	Rattus norvegicus WD repeat domain 24, mRNA (cDNA clone IMAGE:7376043), complete cds. [BC098800]	BC098800	FALSE
A_44_P418745	0.0452502	0.00536973	-0.300358	0.0551156	0.130743	-1.02242	-0.826902	AA964289	AA964289	AA964289 UI-R-C0-gy-d-05-0-UI.s1 UI-R-C0 Rattus norvegicus cDNA clone UI-R-C0-gy-d-05-0-UI 3', mRNA sequence [AA964289]	AA964289	FALSE
A_44_P670337	0.0182041	0.000118539	0.0128598	-0.509229	-1.3025	-0.366684	-0.720481	TC609906	TC609906			FALSE
A_43_P18054	0.0369859	0.00330189	0.281294	-0.119295	-0.2629	0.531434	0.578764	NM_001006602	Pigs	Rattus norvegicus phosphatidylinositol glycan, class S (Pigs), mRNA [NM_001006602]	NM_001006602	FALSE
A_44_P696483	0.0483419	0.0062362	-0.0972208	-0.351008	-0.714345	-0.383854	-0.420356	XM_217099	LOC300472	PREDICTED: Rattus norvegicus similar to Vacuolar protein sorting 26 homolog (VPS26 protein homolog) (LOC300472), mRNA [XM_217099]	XM_217099	FALSE
A_44_P586876	0.0378336	0.00351599	-0.18337	-0.381098	-0.37729	0.180133	0.340934	XM_001058055	LOC681708	PREDICTED: Rattus norvegicus similar to transmembrane protein 41a (LOC681708), mRNA [XM_001058055]	XM_001058055	FALSE
A_44_P1054864	0.020081	0.000353073	-0.0990859	-0.205564	-0.126094	0.493192	0.536632	NM_001007662	Arcn1	Rattus norvegicus archain 1 (Arcn1), mRNA [NM_001007662]	NM_001007662	FALSE
A_42_P810736	0.026782	0.00123427	-0.42942	-0.853599	-0.932193	0.38348	0.257303	NM_031340	Timeless	Rattus norvegicus timeless homolog (Drosophila) (Timeless), mRNA [NM_031340]	NM_031340	FALSE
A_44_P159355	0.0353186	0.00295254	-0.640832	-0.713235	-0.593802	0.243173	0.185231	ENSRNOT00000014436	RGD1307814_predicted	Rattus norvegicus similar to KIAA1730 protein (LOC362559), mRNA [XM_342878]		FALSE
A_42_P561930	0.0297375	0.00176477	-0.337506	-0.835316	-0.90639	0.313566	0.400809	BC104705	BC104705	Rattus norvegicus cDNA clone IMAGE:7314885. [BC104705]	BC104705	FALSE
A_44_P479917	0.0378833	0.00354375	0.0360408	-0.860399	-1.13364	0.126594	0.331015	NM_030864	Mtr	Rattus norvegicus 5-methyltetrahydrofolate-homocysteine methyltransferase (Mtr), mRNA [NM_030864]	NM_030864	FALSE
A_44_P1030669	0.0299969	0.00180958	0.0833515	-0.240384	-0.410189	0.445001	0.30139	NM_053959	Bin1	Rattus norvegicus bridging integrator 1 (Bin1), mRNA [NM_053959]	NM_053959	FALSE
A_44_P480636	0.0312503	0.00205067	-0.15973	-0.336808	-0.371101	0.6009	0.599139	NM_001005381	Ddx19	Rattus norvegicus DEAD (Asp-Glu-Ala-Asp) box polypeptide 19 (Ddx19), mRNA [NM_001005381]	NM_001005381	FALSE
A_44_P244995	0.027636	0.00137877	-0.24718	-0.496527	-0.72221	0.0461272	0.105147	NM_001012110	Zfp513	Rattus norvegicus zinc finger protein 513 (Zfp513), mRNA [NM_001012110]	NM_001012110	FALSE
A_44_P1056473	0.0329963	0.0023503	-0.102893	-0.576093	-0.636366	0.00309563	0.10116	XM_216408	XM_216408	Rattus norvegicus similar to 80 kDa nuclear cap binding protein (NCBP 80 kDa subunit) (CBP80) (LOC298075), mRNA [XM_216408]	XM_216408	FALSE
A_44_P592627	0.0273638	0.0013344	-0.0134163	-0.302536	-0.214757	1.15153	1.19269	XM_575305	RGD1563203_predicted	PREDICTED: Rattus norvegicus similar to Sterile alpha motif domain containing 10 (predicted) (RGD1563203_predicted), mRNA [XM_575305]	XM_575305	FALSE
A_44_P542995	0.0263082	0.00113729	-0.0219344	-0.470635	-0.640947	0.431154	0.51715	XM_232536	Ppfibp1_predicted	PREDICTED: Rattus norvegicus PTPRF interacting protein, binding protein 1 (liprin beta 1) (predicted) (Ppfibp1_predicted), mRNA [XM_232536]	XM_232536	FALSE
A_44_P636436	0.0391828	0.00388258	1.29373	0.735261	0.731894	0.129359	0.495301	NM_001007736	Tmem109	Rattus norvegicus transmembrane protein 109 (Tmem109), mRNA [NM_001007736]	NM_001007736	FALSE
A_44_P802495	0.0450893	0.00532013	0.289436	0.0135221	-0.0241951	0.490205	0.612343	XM_223399	RGD1562438_predicted	PREDICTED: Rattus norvegicus similar to amyloid beta (A4) precursor protein-binding, family B, member 2 (predicted) (RGD1562438_predicted), mRNA [XM_223399]	XM_223399	FALSE
A_44_P111430	0.0323292	0.00222697	-0.247754	-0.575246	-0.906781	-0.698587	-0.524941	AW143657	AW143657	AW143657 EST293953 Normalized rat embryo, Bento Soares Rattus sp. cDNA clone RGIBX42 5' end, mRNA sequence [AW143657]	AW143657	FALSE
A_44_P460456	0.0371322	0.00333816	0.161733	0.00914818	-0.101256	0.579767	0.60129	NM_001033708	Rae1	Rattus norvegicus RAE1 RNA export 1 homolog (S. pombe) (Rae1), mRNA [NM_001033708]	NM_001033708	FALSE
A_44_P373413	0.0212821	0.000540165	-0.198858	-0.352684	-0.42462	0.272176	0.345273	NM_001009825	Ppp1r7	Rattus norvegicus protein phosphatase 1, regulatory (inhibitor) subunit 7 (Ppp1r7), mRNA [NM_001009825]	NM_001009825	FALSE
A_44_P203769	0.0467949	0.0057878	0.0691963	0.0540793	0.116849	0.622329	0.843178	NM_001006964	MGC94542	Rattus norvegicus similar to RIKEN cDNA 5430437P03 (MGC94542), mRNA [NM_001006964]	NM_001006964	FALSE
A_44_P263669	0.0323805	0.00225269	-0.0593308	-0.437149	-0.634627	0.160813	0.179513	NM_001047916	Syncrip	Rattus norvegicus synaptotagmin binding, cytoplasmic RNA interacting protein (Syncrip), mRNA [NM_001047916]	NM_001047916	FALSE
A_42_P727584	0.0439851	0.00506556	0.173877	-0.0336306	-0.0148484	0.435779	0.792223	NM_031622	Mapk6	Rattus norvegicus mitogen-activated protein kinase 6 (Mapk6), mRNA [NM_031622]	NM_031622	FALSE
A_43_P12782	0.0256092	0.00102322	-0.103363	-0.435997	-0.875314	-0.112642	-0.185813	NM_053355	Ikbkb	Rattus norvegicus inhibitor of kappaB kinase beta (Ikbkb), mRNA [NM_053355]	NM_053355	FALSE
A_44_P1019923	0.0235005	0.000801761	-0.095054	-0.246165	-0.885299	-0.503641	-0.703757	NM_022522	Casp2	Rattus norvegicus caspase 2 (Casp2), mRNA [NM_022522]	NM_022522	FALSE
A_43_P19378	0.0472006	0.00589587	-0.373577	-0.446944	-0.721349	-0.160624	0.166078	NM_001008372	Papd4	Rattus norvegicus PAP associated domain containing 4 (Papd4), mRNA [NM_001008372]	NM_001008372	FALSE
A_44_P555539	0.0455801	0.00545168	-0.156054	-0.912093	-0.394292	0.547664	0.611994	NM_001033688	Dsc2	Rattus norvegicus desmocollin 2 (Dsc2), mRNA [NM_001033688]	NM_001033688	FALSE
A_44_P226612	0.0484148	0.00626285	-0.240274	-0.892123	-0.609091	-0.185508	0.119466	NM_012879	Slc2a2	Rattus norvegicus solute carrier family 2 (facilitated glucose transporter), member 2 (Slc2a2), mRNA [NM_012879]	NM_012879	FALSE
A_44_P478110	0.0367168	0.00324471	0.0431319	-0.254405	-0.489085	-0.296077	-0.333121	NM_001037645	Rab2b	Rattus norvegicus RAB2B, member RAS oncogene family (Rab2b), mRNA [NM_001037645]	NM_001037645	FALSE
A_44_P1057791	0.0221841	0.000648299	0.072981	-0.0168288	-0.269683	-0.5371	-0.512033	NM_138532	Nme7	Rattus norvegicus non-metastatic cells 7, protein expressed in (Nme7), mRNA [NM_138532]	NM_138532	FALSE
A_44_P730837	0.0357007	0.00305231	-0.0201796	-0.643575	-0.931028	0.0652186	-0.0258571	TC591409	TC591409			FALSE
A_44_P874636	0.0332498	0.00240651	-0.100482	-0.201609	-0.56856	-0.632234	-0.526636	AA850319	AA850319	AA850319 EST193086 Normalized rat ovary, Bento Soares Rattus sp. cDNA clone ROVAE61 5' end, mRNA sequence [AA850319]	AA850319	FALSE
A_44_P171372	0.0210499	0.000531195	0.436165	0.258842	0.309065	1.31959	1.46609	NM_001033683	Vat1	Rattus norvegicus vesicle amine transport protein 1 homolog (T californica) (Vat1), mRNA [NM_001033683]	NM_001033683	FALSE
A_42_P792945	0.00298883	7.28024e-07	0.573145	-0.00956005	-0.262156	-0.797524	-1.00868	NM_053962	Sds	Rattus norvegicus serine dehydratase (Sds), mRNA [NM_053962]	NM_053962	FALSE
A_44_P490954	0.0333971	0.00244373	0.0190977	-0.539226	-0.682562	0.300812	0.768328	XR_005671	LOC680231	PREDICTED: Rattus norvegicus similar to chromodomain helicase DNA binding protein 9 (LOC680231), mRNA [XR_005671]	XR_005671	FALSE
A_42_P800852	0.0274974	0.00135046	-0.0808433	-0.459739	-0.727172	-0.278575	-0.0515901	XM_230007	RGD1565257_predicted	Rattus norvegicus similar to KIAA2024 protein (LOC311115), mRNA [XM_230007]	XM_230007	FALSE
A_44_P518385	0.0338452	0.00256269	0.0336338	-0.288855	-0.159391	0.407733	0.553642	NM_001025696	Yars	Rattus norvegicus tyrosyl-tRNA synthetase (Yars), mRNA [NM_001025696]	NM_001025696	FALSE
A_44_P384260	0.0369859	0.00330994	-0.133436	0.101085	-0.52229	-1.19065	-1.13609	NM_021595	Ninj2	Rattus norvegicus ninjurin 2 (Ninj2), mRNA [NM_021595]	NM_021595	FALSE
A_42_P570394	0.0393157	0.00392708	-0.60975	-0.662049	-0.889551	-0.0365696	-0.0504264	BC107559	LOC497078	Rattus norvegicus XK-related protein 1, mRNA (cDNA clone MGC:124512 IMAGE:7933294), complete cds [BC107559]	BC107559	FALSE
A_44_P342966	0.0375279	0.00342456	-0.176247	-0.190053	-0.410563	-1.03776	-0.825724	ENSRNOT00000040080	Rwdd3	PREDICTED: Rattus norvegicus RWD domain containing 3 (Rwdd3), mRNA [XM_342332]		FALSE
A_43_P11978	0.0243559	0.000883172	-0.277625	-0.513499	-0.860111	-0.726003	-0.701838	NM_019208	Men1	Rattus norvegicus multiple endocrine neoplasia 1 (Men1), mRNA [NM_019208]	NM_019208	FALSE
A_43_P19205	0.0451966	0.0053438	0.597279	0.482734	0.199805	1.78184	1.67049	ENSRNOT00000056153	ENSRNOT00000056153	PREDICTED: Rattus norvegicus similar to SWI/SNF-related matrix-associated actin-dependent regulator of chromatin subfamily C member 1 (SWI/SNF complex 155 kDa subunit) (BRG1-associated factor 155) (SWI3-related protein), transcript variant 2...		FALSE
A_42_P811256	0.0256092	0.00104153	-0.845313	-1.01417	-0.870766	0.375763	1.096	NM_001025623	Vnn1	Rattus norvegicus vanin 1 (Vnn1), mRNA [NM_001025623]	NM_001025623	FALSE
A_44_P871882	0.0169896	3.43646e-05	0.653686	0.270505	0.0340078	1.60362	2.09157	TC636257	TC636257	Q5NXT5_AZOSE (Q5NXT5) Predicted transmembrane protein, partial (6%) [TC631849]		FALSE
A_42_P782490	0.0425699	0.00469024	-0.048231	-0.852458	-1.2623	0.201079	0.297918	ENSRNOT00000019408	RGD1560268_predicted	PREDICTED: Rattus norvegicus similar to AT motif-binding factor (predicted) (RGD1560268_predicted), mRNA [XM_226464]		FALSE
A_43_P20159	0.0457519	0.00549861	0.112285	-0.521552	-0.791954	0.238216	0.345373	ENSRNOT00000033355	Atrx	Transcriptional regulator ATRX (EC 3.6.1.-) (ATP-dependent helicase ATRX) (X-linked nuclear protein) (pABP-2) (Fragment). [Source:Uniprot/SWISSPROT;Acc:P70486] [ENSRNOT00000033355]		FALSE
A_42_P518016	0.0196408	0.000299221	-0.312245	-0.442691	-0.660061	-0.040275	-0.00135195	NM_001025699	LOC313618	Rattus norvegicus macoilin (LOC313618), mRNA [NM_001025699]	NM_001025699	FALSE
A_42_P811423	0.0475632	0.00601723	-0.00393307	-0.748655	-0.787725	0.867498	0.507443	XM_223781	Vcl_predicted	PREDICTED: Rattus norvegicus vinculin (predicted) (Vcl_predicted), mRNA [XM_223781]	XM_223781	FALSE
A_44_P484836	0.0290421	0.00165005	-0.289489	-0.70435	-0.96079	0.537008	0.575594	NM_053773	Tjp2	Rattus norvegicus tight junction protein 2 (Tjp2), mRNA [NM_053773]	NM_053773	FALSE
A_44_P418320	0.020652	0.000446446	0.491063	0.00526047	0.111568	1.08702	1.25319	BM986276	BM986276	BM986276 EST531184 Rat gene index, normalized rat, norvegicus Rattus norvegicus cDNA clone RGIAE01 5' end similar to pyrimidine binding protein, mRNA sequence [BM986276]	BM986276	FALSE
A_44_P278116	0.0472006	0.00590726	0.207654	-0.274786	-0.536791	0.187816	0.00344574	XM_001069404	LOC686310	PREDICTED: Rattus norvegicus similar to Ephrin type-B receptor 4 precursor (Tyrosine-protein kinase receptor MDK-2) (Developmental kinase 2) (Tyrosine kinase MYK-1), transcript variant 3 (LOC686310), mRNA [XM_001069404]	XM_001069404	FALSE
A_42_P482829	0.0273638	0.00133217	-0.0708858	-0.264085	-0.386692	0.35731	0.367303	ENSRNOT00000014330	Vps11_predicted	PREDICTED: Rattus norvegicus vacuolar protein sorting 11 (yeast) (predicted) (Vps11_predicted), mRNA [XM_236189]		FALSE
A_44_P348726	0.0300599	0.00183078	0.012818	-0.266837	-0.344835	-0.742449	-0.530581	AI232526	AI232526	AI232526 EST229214 Normalized rat kidney, Bento Soares Rattus sp. cDNA clone RKICC80 3' end, mRNA sequence [AI232526]	AI232526	FALSE
A_44_P520748	0.0265174	0.00120102	-0.0276628	-0.61586	-0.780965	0.735337	0.675728	ENSRNOT00000039709	Cad	PREDICTED: Rattus norvegicus carbamyl phosphatate synthetase 2 (mapped) (Cad_mapped), mRNA [XM_343027]		FALSE
A_42_P508358	0.0464426	0.00567406	-0.351164	-0.840026	-1.34333	-0.211308	-0.35294	XM_238325	RGD1304977_predicted	PREDICTED: Rattus norvegicus similar to mKIAA0023 protein (predicted) (RGD1304977_predicted), mRNA [XM_238325]	XM_238325	FALSE
A_42_P573352	0.0440747	0.00509241	-0.140467	-0.47673	-1.16459	-0.257042	-0.802638	XM_224757	RGD1307618_predicted	PREDICTED: Rattus norvegicus similar to chondroitin beta1,4 N-acetylgalactosaminyltransferase (predicted) (RGD1307618_predicted), mRNA [XM_224757]	XM_224757	FALSE
A_44_P1034417	0.025034	0.000953139	-0.190582	-0.535772	-0.899026	-0.807912	-0.844603	AB026288	Inpp5e	Rattus norvegicus mRNA for pharbin, partial cds [AB026288]	AB026288	FALSE
A_44_P576564	0.0182041	0.000132173	-0.379397	-0.583525	-0.642656	0.137657	0.636388	CK475184	CK475184	AGENCOURT_17618576 NIH_MGC_236 Rattus norvegicus cDNA clone IMAGE:7130797 5', mRNA sequence [CK475184]	CK475184	FALSE
A_44_P532096	0.0300599	0.00183015	0.0513815	-0.210788	-0.414112	0.462174	0.725988	XR_006087	LOC290577	PREDICTED: Rattus norvegicus hypothetical LOC290577 (LOC290577), mRNA [XR_006087]	XR_006087	FALSE
A_44_P432950	0.020081	0.000358048	-0.366596	0.0735646	-0.0616901	-0.727207	-0.901341	AA900681	AA900681	AA900681 UI-R-E0-di-h-07-0-UI.s1 UI-R-E0 Rattus norvegicus cDNA clone UI-R-E0-di-h-07-0-UI 3' similar to gi [AA900681]	AA900681	FALSE
A_44_P1026191	0.0358577	0.00307937	0.381755	0.185011	0.015963	0.875273	0.860364	NM_001039338	LOC362156	Rattus norvegicus membrane-associated DHHC5 zinc finger protein (LOC362156), mRNA [NM_001039338]	NM_001039338	FALSE
A_44_P542594	0.0413932	0.00441595	0.0100009	0.157624	0.0203007	-0.401911	-0.278981	AI044434	AI044434	UI-R-C1-js-e-02-0-UI.s1 UI-R-C1 Rattus norvegicus cDNA clone UI-R-C1-js-e-02-0-UI 3', mRNA sequence [AI044434]	AI044434	FALSE
A_44_P379699	0.0187873	0.000253524	0.459315	0.0029633	-0.398614	0.678263	0.500696	ENSRNOT00000060977	Rapgef1	PREDICTED: Rattus norvegicus Rap guanine nucleotide exchange factor (GEF) 1 (Rapgef1), mRNA [XM_216018]		FALSE
A_44_P175846	0.0460457	0.00558504	0.0885268	-0.744962	-1.07917	0.405987	0.177697	XM_226278	LOC307671	Rattus norvegicus similar to HBxAg transactivated protein 2 (LOC307671), mRNA [XM_226278]	XM_226278	FALSE
A_43_P10302	0.0440747	0.00509306	0.667512	-0.0504057	0.0736651	-0.210861	-0.0557864	ENSRNOT00000006222	ENSRNOT00000006222	PREDICTED: Rattus norvegicus similar to angiopoietin-like 1 (LOC679942), mRNA [XM_001054429]		FALSE
A_44_P670480	0.0362994	0.00317777	0.0676829	-0.295131	-0.929912	-0.0300334	0.0118332	TC607866	TC607866			FALSE
A_44_P431774	0.027534	0.00137103	-0.218528	-1.02232	-0.921434	0.391765	0.200225	AW916210	AW916210	AW916210 EST347514 Rat gene index, normalized rat, norvegicus, Bento Soares Rattus norvegicus cDNA clone RGIDJ44 5' end, mRNA sequence [AW916210]	AW916210	FALSE
A_44_P106424	0.0263791	0.00115868	-0.714005	-0.0803271	-0.338385	-0.93304	-1.23392	AI411329	AI411329	AI411329 EST239623 Normalized rat kidney, Bento Soares Rattus sp. cDNA clone RKIEU56 3' end, mRNA sequence [AI411329]	AI411329	FALSE
A_44_P291862	0.0206174	0.000436466	-0.210563	-0.531953	-0.49575	0.0491387	0.296728	BC090554	BC090554	Rattus norvegicus cDNA clone IMAGE:7315352, **** WARNING: chimeric clone ****. [BC090554]	BC090554	FALSE
A_44_P650305	0.0476749	0.00607578	0.236485	0.313416	0.633845	-0.632823	-0.364084	BE104538	BE104538	BE104538 UI-R-BX0-arq-e-08-0-UI.s1 UI-R-BX0 Rattus norvegicus cDNA clone UI-R-BX0-arq-e-08-0-UI 3', mRNA sequence [BE104538]	BE104538	FALSE
A_44_P276106	0.0240772	0.000847302	-0.055976	-0.480707	-0.553311	0.677458	0.737008	NM_012499	Apc	Rattus norvegicus adenomatosis polyposis coli (Apc), mRNA [NM_012499]	NM_012499	FALSE
A_42_P708541	0.028084	0.00146809	-0.1666	-0.297622	-0.176643	0.118297	0.334711	ENSRNOT00000020451	Mrps5_predicted	PREDICTED: Rattus norvegicus mitochondrial ribosomal protein S5 (predicted) (Mrps5_predicted), mRNA [XM_215833]		FALSE
A_44_P444339	0.0208809	0.000490034	-0.0819415	-0.555823	-0.660607	0.620406	0.764874	XM_220446	Larp1_predicted	PREDICTED: Rattus norvegicus La ribonucleoprotein domain family, member 1 (predicted) (Larp1_predicted), mRNA [XM_220446]	XM_220446	FALSE
A_42_P563376	0.0362111	0.00316227	-0.0840908	-0.380865	-0.329595	0.1165	0.187279	NM_145085	Pcyox1	Rattus norvegicus prenylcysteine oxidase 1 (Pcyox1), mRNA [NM_145085]	NM_145085	FALSE
A_44_P522987	0.0268011	0.00123776	-0.43532	-0.742133	-0.81379	0.072888	0.0951779	ENSRNOT00000031812	Dmxl1_predicted	Rattus norvegicus similar to Dmx-like 1 (LOC307429), mRNA [XM_225941]		FALSE
A_44_P298013	0.0397467	0.00405851	0.139276	0.0753825	-0.0475091	-0.182142	-0.038499	ENSRNOT00000004314	LOC497867	LOC497867 protein (Fragment). [Source:Uniprot/SPTREMBL;Acc:Q3B8R8] [ENSRNOT00000004314]		FALSE
A_44_P713734	0.0295202	0.001743	-0.0883746	-0.162942	-0.267292	0.300071	0.534011	XR_005646	LOC364806	PREDICTED: Rattus norvegicus similar to Elongation factor 1-gamma (EF-1-gamma) (eEF-1B gamma) (LOC364806), mRNA [XR_005646]	XR_005646	FALSE
A_44_P640734	0.0268416	0.00124943	-0.157648	-0.613641	-1.14083	-0.468271	-0.579461	TC604207	TC604207			FALSE
A_44_P243520	0.0243559	0.000883337	0.498752	0.112279	-0.211444	0.630632	0.691362	NM_001047902	RGD1308290_predicted	Rattus norvegicus similar to RIKEN cDNA 5730454B08 (predicted) (RGD1308290_predicted), mRNA [NM_001047902]	NM_001047902	FALSE
A_44_P777576	0.018484	0.000204171	0.0474005	-0.137367	-0.232025	0.430844	0.529889	TC603447	TC603447			FALSE
A_44_P348868	0.0354339	0.00300572	-0.252525	-0.827011	-1.13938	0.303766	0.0891231	NM_019226	Dync1h1	Rattus norvegicus dynein cytoplasmic 1 heavy chain 1 (Dync1h1), mRNA [NM_019226]	NM_019226	FALSE
A_42_P617594	0.0187873	0.000252322	-0.0360822	0.236578	-0.141489	-0.613193	-0.607136	NM_017188	Unc119	Rattus norvegicus UNC-119 homolog (C. elegans) (Unc119), mRNA [NM_017188]	NM_017188	FALSE
A_44_P249784	0.0190168	0.000260327	-0.322504	-0.521926	-0.727727	-0.700807	-0.969638	AA944160	AA944160	AA944160 EST199659 Normalized rat embryo, Bento Soares Rattus sp. cDNA clone REMAD10 3' end, mRNA sequence [AA944160]	AA944160	FALSE
A_44_P297862	0.0300099	0.00181577	0.0581452	0.408322	0.17346	-0.805262	-0.49708	XM_236308	XM_236308	Rattus norvegicus similar to H3 histone, family 3B (LOC300760), mRNA [XM_236308]	XM_236308	FALSE
A_43_P21317	0.0454591	0.00542134	-0.249389	-0.508228	-0.792145	0.172783	0.258989	ENSRNOT00000022757	Zfp612_predicted	PREDICTED: Rattus norvegicus zinc finger protein 612 (predicted) (Zfp612_predicted), mRNA [XM_226455]		FALSE
A_44_P272346	0.0210473	0.000527027	0.303408	-0.22316	-0.386812	0.909576	0.90867	XM_345930	XM_345930	Rattus norvegicus similar to guanine nucleotide exchange factor (LOC367072), mRNA [XM_345930]	XM_345930	FALSE
A_44_P459279	0.0182041	0.000147848	0.0406597	-0.407185	-0.163385	1.08564	1.32236	ENSRNOT00000016770	RGD1305036_predicted	PREDICTED: Rattus norvegicus similar to RIKEN cDNA 2610034N24 (predicted) (RGD1305036_predicted), mRNA [XR_008152]		FALSE
A_42_P815446	0.0285217	0.00153814	0.474989	0.274641	-0.229828	0.213014	0.100797	ENSRNOT00000015602	Zfyve20_predicted	Rattus norvegicus similar to RIKEN cDNA 5330426D11 (LOC312562), mRNA [XM_232195]		FALSE
A_44_P1037997	0.0486422	0.0063436	0.0411338	-0.449299	-0.76005	-0.111199	-0.128705	BG670699	BG670699	BG670699 DRNBED04 Rat DRG Library Rattus norvegicus cDNA clone DRNBED04 5', mRNA sequence [BG670699]	BG670699	FALSE
A_44_P187215	0.0396387	0.00403783	0.421884	0.474519	1.51568	-0.128696	-0.231127	NM_017210	Dio3	Rattus norvegicus deiodinase, iodothyronine, type III (Dio3), mRNA [NM_017210]	NM_017210	FALSE
A_44_P234636	0.0220906	0.000621701	0.130424	-0.454879	-0.620666	0.314484	0.413027	NM_001031639	Psmd2	Rattus norvegicus proteasome (prosome, macropain) 26S subunit, non-ATPase, 2 (Psmd2), mRNA [NM_001031639]	NM_001031639	FALSE
A_44_P468968	0.018484	0.000163283	-0.129997	-0.549708	-0.769072	0.216067	0.261877	ENSRNOT00000014405	ENSRNOT00000014405	Dicer1 protein (Fragment). [Source:Uniprot/SPTREMBL;Acc:Q4G034] [ENSRNOT00000014405]		FALSE
A_44_P219092	0.0295862	0.00174833	0.073083	-0.659027	-0.59446	0.478815	0.739892	CF109537	CF109537	Shultzomica02788 Rat lung airway and parenchyma cDNA libraries Rattus norvegicus cDNA clone Contig2430 5', mRNA sequence [CF109537]	CF109537	FALSE
A_42_P732189	0.020081	0.000338451	-0.318675	-0.145108	-0.502063	-0.979354	-0.937989	NM_139114	Rpl15	Rattus norvegicus ribosomal protein L15 (Rpl15), mRNA [NM_139114]	NM_139114	FALSE
A_42_P540933	0.0279908	0.00145634	-0.0210166	-0.132174	-0.416187	-0.0470207	-0.0461733	NM_001030039	Csk	Rattus norvegicus c-src tyrosine kinase (Csk), mRNA [NM_001030039]	NM_001030039	FALSE
A_42_P736315	0.0378336	0.00350694	-0.466789	0.341099	-0.59123	-1.30368	-1.48325	ENSRNOT00000043660	Rtp4_predicted	PREDICTED: Rattus norvegicus receptor transporter protein 4 (predicted) (Rtp4_predicted), mRNA [XM_001056345]		FALSE
A_44_P107535	0.0427928	0.00474617	0.432517	-0.388627	-0.161896	0.884313	1.17499	XM_238093	Ltbp4	PREDICTED: Rattus norvegicus latent transforming growth factor beta binding protein 4 (Ltbp4), mRNA [XM_238093]	XM_238093	FALSE
A_43_P10706	0.0401485	0.00414452	-0.193193	-0.193853	-0.609769	-0.748962	-0.798418	XM_001069243	LOC689030	PREDICTED: Rattus norvegicus similar to TATA box-binding protein-like protein 1 (TBP-like protein 1) (TATA box-binding protein-related factor 2) (TBP-related factor 2) (21-kDa TBP-like protein) (LOC689030), mRNA [XM_001069243]	XM_001069243	FALSE
A_44_P425884	0.0298915	0.00179742	-0.000578523	-0.0972931	-0.0319692	0.397584	0.585501	NM_178334	Egln1	Rattus norvegicus EGL nine homolog 1 (C. elegans) (Egln1), mRNA [NM_178334]	NM_178334	FALSE
A_44_P868315	0.0378833	0.0035367	-0.0624052	-0.442209	-0.831801	-0.437742	-0.423428	TC639761	TC639761	BC023828 Hnrpa3 protein {Mus musculus} (exp=-1; wgp=0; cg=0), partial (18%) [TC639761]		FALSE
A_42_P502271	0.0486086	0.00632762	0.295529	0.551827	0.676177	-0.179151	0.0694665	XM_236376	RGD1311958_predicted	PREDICTED: Rattus norvegicus similar to 6430514L14Rik protein (predicted) (RGD1311958_predicted), mRNA [XM_236376]	XM_236376	FALSE
A_42_P544167	0.0421091	0.00455673	-0.000573516	-0.594834	-0.834504	0.656322	0.38594	NM_022591	Tep1	Rattus norvegicus telomerase associated protein 1 (Tep1), mRNA [NM_022591]	NM_022591	FALSE
A_43_P10264	0.0412706	0.00438357	0.841404	0.256415	-0.105583	0.851	0.852899	ENSRNOT00000027668	Sf3b2_predicted	Rattus norvegicus similar to Splicing factor 3b, subunit 2 (LOC293671), mRNA [XM_215182]		FALSE
A_44_P480296	0.0422013	0.00459697	-0.0823692	-0.259348	-0.204329	0.384135	0.816941	NM_130826	Hadha	Rattus norvegicus hydroxyacyl-Coenzyme A dehydrogenase/3-ketoacyl-Coenzyme A thiolase/enoyl-Coenzyme A hydratase (trifunctional protein), alpha subunit (Hadha), mRNA [NM_130826]	NM_130826	FALSE
A_44_P670640	0.0204026	0.000423432	-0.234685	-0.0789373	-0.247664	-1.33415	-1.40063	TC636448	TC636448			FALSE
A_43_P13386	0.035118	0.00288915	-0.332017	-0.687909	-0.928463	-0.0628412	0.0562052	NM_139333	Prpf19	Rattus norvegicus PRP19/PSO4 pre-mRNA processing factor 19 homolog (S. cerevisiae) (Prpf19), mRNA [NM_139333]	NM_139333	FALSE
A_44_P112481	0.0294903	0.00173347	-0.0461282	0.208081	-0.31269	-1.82343	-1.42631	BF525199	BF525199	UI-R-AB1-ys-h-01-0-UI.r1 UI-R-AB1 Rattus norvegicus cDNA clone UI-R-AB1-ys-h-01-0-UI 5', mRNA sequence [BF525199]	BF525199	FALSE
A_44_P527983	0.0301792	0.0018613	0.286959	0.329532	-0.295992	-0.698026	-0.655595	BQ782789	BQ782789	UI-R-FF0-cpl-g-06-0-UI.s1 UI-R-FF0 Rattus norvegicus cDNA clone UI-R-FF0-cpl-g-06-0-UI 3', mRNA sequence [BQ782789]	BQ782789	FALSE
A_44_P638264	0.0359961	0.00312224	-0.335392	-0.687974	-0.871618	-0.266765	-0.0572641	TC594447	TC594447	Q9U677_DROME (Q9U677) Coatomer protein gamma subunit, partial (3%) [TC594447]		FALSE
A_44_P519167	0.018045	6.72163e-05	0.0931902	-0.332422	-0.197744	1.04972	0.923619	NM_001012174	Fkbp5	Rattus norvegicus FK506 binding protein 5 (Fkbp5), mRNA [NM_001012174]	NM_001012174	FALSE
A_44_P927439	0.0277596	0.00141455	-0.232028	-0.39871	-0.431397	0.50239	0.812876	NM_001014772	Adam9	Rattus norvegicus a disintegrin and metalloproteinase domain 9 (meltrin gamma) (Adam9), mRNA [NM_001014772]	NM_001014772	FALSE
A_44_P989601	0.020652	0.000446434	0.0982907	0.664915	0.0994012	-0.858348	-1.0775	A_44_P989601	A_44_P989601			FALSE
A_44_P282054	0.0115275	8.52414e-06	0.191409	-0.142338	-0.0840199	0.372228	0.775704	ENSRNOT00000008909	Mmp19_predicted	PREDICTED: Rattus norvegicus matrix metalloproteinase 19 (predicted) (Mmp19_predicted), mRNA [XM_222317]		FALSE
A_43_P15012	0.0243559	0.000875921	-0.051308	-0.524648	-0.910434	-0.168833	-0.386185	TC585453	TC585453			FALSE
A_44_P511516	0.0247062	0.000921953	0.687593	-0.148788	-0.440802	1.21018	1.25942	ENSRNOT00000002692	Zbtb20_predicted	Rattus norvegicus similar to zinc finger protein 288 (LOC288105), mRNA [XM_213621]		FALSE
A_44_P501051	0.034696	0.0028096	0.0525	-0.225088	-0.293734	0.552268	0.680757	ENSRNOT00000027501	ENSRNOT00000027501	Peroxisomal 2,4-dienoyl-CoA reductase (EC 1.3.1.34) (2,4-dienoyl-CoA reductase 2) (DCR-AKL) (pVI-AKL). [Source:Uniprot/SWISSPROT;Acc:Q9Z2M4] [ENSRNOT00000027501]		FALSE
A_43_P11178	0.035254	0.00291794	-0.382664	0.0536482	-0.0621935	-0.856482	-0.797715	TC590435	TC590435			FALSE
A_44_P610365	0.0378336	0.00351735	-0.562998	-0.726529	-1.13357	0.0995194	-0.0496541	TC587738	TC587738	Q2VT54_CAPAN (Q2VT54) DC1.2-like, partial (9%) [TC587738]		FALSE
A_44_P206315	0.0433636	0.00488275	-0.142624	-0.266809	-0.215942	0.220239	0.533957	NM_001024757	Wwp1	Rattus norvegicus WW domain containing E3 ubiquitin protein ligase 1 (Wwp1), mRNA [NM_001024757]	NM_001024757	FALSE
A_44_P179422	0.018484	0.000200718	0.75911	0.575355	0.204717	-0.154254	-0.0520211	NM_054006	Unr	Rattus norvegicus upstream of NRAS (Unr), mRNA [NM_054006]	NM_054006	FALSE
A_44_P794522	0.0278761	0.00143543	-0.0876684	-0.630519	-1.08224	0.142901	0.195781	TC602239	TC602239	Q7TPJ2_RAT (Q7TPJ2) Ac2-224, partial (18%) [TC602239]		FALSE
A_44_P179956	0.032622	0.00230756	0.13322	0.400354	-0.263682	-1.14329	-0.961962	AY321344	Igtp	Rattus norvegicus Ac2-233 mRNA, complete cds. [AY321344]	AY321344	FALSE
A_44_P437736	0.0333517	0.00243228	0.29325	0.599949	0.726463	-0.218627	-0.37443	BI296388	BI296388	UI-R-DK0-cez-g-08-0-UI.s1 UI-R-DK0 Rattus norvegicus cDNA clone UI-R-DK0-cez-g-08-0-UI 3', mRNA sequence [BI296388]	BI296388	FALSE
A_44_P540910	0.0278761	0.00143277	-0.0941917	-0.18965	-0.430958	-0.507601	-0.466006	NM_031775	Casp6	Rattus norvegicus caspase 6 (Casp6), mRNA [NM_031775]	NM_031775	FALSE
A_44_P991773	0.047674	0.00607101	0.126118	-0.187056	-0.517514	0.52437	0.219393	ENSRNOT00000049285	ENSRNOT00000049285	PREDICTED: Rattus norvegicus similar to Nedd4 binding protein 1 (predicted) (RGD1305179_predicted), mRNA [XM_214648]		FALSE
A_43_P19180	0.0203907	0.000387283	0.0489124	-0.120246	-0.196063	0.475741	0.696789	ENSRNOT00000004740	Rufy1	Rufy1 protein (Fragment). [Source:Uniprot/SPTREMBL;Acc:Q4FZR3] [ENSRNOT00000004740]		FALSE
A_44_P833772	0.0459924	0.00555757	-0.0643925	-0.503042	-0.749119	0.0867535	0.18492	XM_001055795	LOC685179	PREDICTED: Rattus norvegicus similar to SWI [XM_001055795]	XM_001055795	FALSE
A_44_P444275	0.0256092	0.00103983	-0.737326	-0.634686	-0.949172	-1.84305	-2.2146	AI179510	AI179510	AI179510 EST223229 Normalized rat spleen, Bento Soares Rattus sp. cDNA clone RSPCI34 3' end, mRNA sequence [AI179510]	AI179510	FALSE
A_44_P293001	0.0272411	0.00131803	0.644702	0.0421008	-0.304074	0.725042	0.653416	NM_001047885	Arse	Rattus norvegicus arylsulfatase E (chondrodysplasia punctata 1) (Arse), mRNA [NM_001047885]	NM_001047885	FALSE
A_44_P1057190	0.0182041	0.000110302	-0.188793	-0.435748	-0.76173	-0.0271057	-0.0280153	XM_216765	XM_216765	Rattus norvegicus similar to RET-II (LOC299258), mRNA [XM_216765]	XM_216765	FALSE
A_44_P209548	0.0394778	0.00398825	-0.246786	-0.451134	-0.562142	-0.00771928	0.0748169	CO567344	CO567344	AGENCOURT_28619180 NIH_MGC_250 Rattus norvegicus cDNA clone IMAGE:7381513 5', mRNA sequence [CO567344]	CO567344	FALSE
A_44_P168917	0.0340245	0.00264365	0.87084	1.0551	0.95065	0.652054	0.359902	ENSRNOT00000036563	Zfp206_predicted	PREDICTED: Rattus norvegicus zinc finger protein 206 (predicted) (Zfp206_predicted), mRNA [XM_220198]		FALSE
A_43_P13557	0.0278775	0.00144093	-0.17762	-0.61423	-0.822802	0.133857	0.316226	CF110620	CF110620	Shultzomica03871 Rat lung airway and parenchyma cDNA libraries Rattus norvegicus cDNA clone Contig3431 5', mRNA sequence [CF110620]	CF110620	FALSE
A_44_P499388	0.0457308	0.00549384	-0.65528	-0.0286621	-0.163965	-0.195584	0.0186042	A_44_P499388	A_44_P499388			FALSE
A_44_P135170	0.0231147	0.000771468	-0.218525	-0.267408	-0.204201	0.301803	0.517575	NM_031603	Ywhae	Rattus norvegicus tyrosine 3-monooxygenase/tryptophan 5-monooxygenase activation protein, epsilon polypeptide (Ywhae), mRNA [NM_031603]	NM_031603	FALSE
A_42_P528779	0.0318839	0.00214654	0.0754404	-0.525039	-0.761397	1.12617	0.860715	BC085798	Kif12	Rattus norvegicus kinesin family member 12, mRNA (cDNA clone IMAGE:7110267), complete cds. [BC085798]	BC085798	FALSE
A_44_P206614	0.048791	0.00637782	0.0397177	-0.255542	-0.839783	0.175634	-0.0360059	ENSRNOT00000023478	RGD1304884_predicted	CA333998 NISC_ls04c08.y1 NCI_CGAP_Pr50 Rattus norvegicus cDNA clone IMAGE:5599119 5', mRNA sequence [CA333998]		FALSE
A_44_P370365	0.0445212	0.00518586	0.554093	0.148459	0.425979	0.941268	1.12378	ENSRNOT00000034550	ENSRNOT00000034550	similar to Glyceraldehyde-3-phosphate dehydrogenase (GAPDH) (LOC305750), mRNA [Source:RefSeq_dna;Acc:XR_008402] [ENSRNOT00000034550]		FALSE
A_44_P864127	0.0300599	0.00183329	-0.0766244	-0.550283	-0.331884	0.338818	0.690087	AW917705	AW917705	AW917705 EST349009 Rat gene index, normalized rat, norvegicus, Bento Soares Rattus norvegicus cDNA clone RGIEH07 5' end, mRNA sequence [AW917705]	AW917705	FALSE
A_43_P18596	0.0289083	0.00161014	-0.162233	-0.584883	-1.092	-0.636418	-0.812296	ENSRNOT00000059597	LOC303057	step II splicing factor SLU7 [Source:RefSeq_peptide;Acc:NP_776208] [ENSRNOT00000059597]		FALSE
A_44_P578250	0.0471423	0.005877	-0.328727	-0.886146	-1.26017	-0.863887	-1.05871	DV714571	DV714571	RVL3980 Wackym-Soares normalized rat vestibular cDNA library Rattus norvegicus cDNA 5', mRNA sequence [DV714571]	DV714571	FALSE
A_44_P372718	0.0330504	0.00237328	0.474202	-0.00865245	0.22097	0.79964	0.958999	ENSRNOT00000036706	ENSRNOT00000036706	similar to Glyceraldehyde-3-phosphate dehydrogenase (GAPDH) (LOC498461), mRNA [Source:RefSeq_dna;Acc:XR_006310] [ENSRNOT00000036706]		FALSE
A_44_P278325	0.0432558	0.00485093	-0.0396863	-0.122728	-0.177832	0.169199	0.332585	XM_001053469	RGD1566014_predicted	PREDICTED: Rattus norvegicus similar to Factor VIII associated protein (predicted) (RGD1566014_predicted), mRNA [XM_001053469]	XM_001053469	FALSE
A_44_P358384	0.0306605	0.00193728	0.113268	-0.393783	-0.109264	0.562469	0.653041	NM_031025	Dlat	Rattus norvegicus dihydrolipoamide S-acetyltransferase (E2 component of pyruvate dehydrogenase complex) (Dlat), mRNA [NM_031025]	NM_031025	FALSE
A_44_P419344	0.0354339	0.00300006	0.0572311	0.393493	0.618762	-0.0395414	-0.230737	XM_001065714	LOC685906	PREDICTED: Rattus norvegicus similar to splicing coactivator subunit SRm300 (LOC685906), mRNA [XM_001065714]	XM_001065714	FALSE
A_42_P793598	0.023831	0.000828926	-0.000322223	0.0619164	-0.477236	-0.821948	-0.992034	NM_194354	LOC378467	Rattus norvegicus promethin (LOC378467), mRNA [NM_194354]	NM_194354	FALSE
A_42_P753270	0.0458302	0.00551386	0.147061	0.0862762	0.135153	0.362551	0.626612	ENSRNOT00000020787	Zfp444_predicted	PREDICTED: Rattus norvegicus zinc finger protein 444 (predicted) (Zfp444_predicted), mRNA [XM_214805]		FALSE
A_44_P121736	0.0203907	0.00037544	-0.0361685	-0.227907	-0.16085	0.2497	0.633342	XM_346293	RGD1564338_predicted	PREDICTED: Rattus norvegicus similar to aminoacylase 1 (predicted) (RGD1564338_predicted), mRNA [XM_346293]	XM_346293	FALSE
A_44_P914577	0.0221809	0.000632447	0.166813	-0.306779	-0.262008	0.579588	0.785265	BF557161	BF557161	UI-R-E1-fy-f-11-0-UI.r1 UI-R-E1 Rattus norvegicus cDNA clone UI-R-E1-fy-f-11-0-UI 5', mRNA sequence [BF557161]	BF557161	FALSE
A_44_P899831	0.0395961	0.00402192	-0.225728	-0.974439	-0.945252	-0.171326	-0.281529	TC583399	TC583399			FALSE
A_44_P292558	0.0258041	0.00108109	0.346275	-0.220278	-0.406973	0.380507	0.456691	NM_213559	Skiv2l	Rattus norvegicus superkiller viralicidic activity 2-like (Skiv2l), mRNA [NM_213559]	NM_213559	FALSE
A_44_P173516	0.0342343	0.00269414	0.512059	0.0609729	0.297814	0.773267	0.961709	XM_234405	XM_234405	Rattus norvegicus similar to glyceraldehyde-3-phosphate dehydrogenase (LOC314309), mRNA [XM_234405]	XM_234405	FALSE
A_44_P859421	0.0323252	0.00222132	0.310391	0.216252	0.310801	-0.218704	0.0826122	BF562910	BF562910	UI-R-BO0-aif-h-08-0-UI.r1 UI-R-BO0 Rattus norvegicus cDNA clone UI-R-BO0-aif-h-08-0-UI 5', mRNA sequence [BF562910]	BF562910	FALSE
A_44_P506751	0.0182041	9.59466e-05	0.249764	-0.219939	-0.411382	0.505255	0.765613	NM_001011896	Abcf3	Rattus norvegicus ATP-binding cassette, sub-family F (GCN20), member 3 (Abcf3), mRNA [NM_001011896]	NM_001011896	FALSE
A_44_P231497	0.045267	0.00539399	-0.148766	-0.4407	-0.408139	0.494022	0.495231	NM_053414	Ddx1	Rattus norvegicus DEAD (Asp-Glu-Ala-Asp) box polypeptide 1 (Ddx1), mRNA [NM_053414]	NM_053414	FALSE
A_42_P601217	0.0221841	0.000634807	0.417679	-0.0392345	-0.171203	0.555403	0.71434	NM_053460	Pick1	Rattus norvegicus protein interacting with C kinase 1 (Pick1), mRNA [NM_053460]	NM_053460	FALSE
A_44_P323558	0.0203907	0.000381883	0.0226406	-0.609595	-0.463061	0.635658	0.809552	ENSRNOT00000022981	Ccnt2_predicted	Rattus norvegicus similar to cyclin T2 isoform b; cyclin T2a; cyclin T2b; SDS-stable vimentin-bound DNA fragment HEF42VIM22; subunit of positive elongation transcription factor b (LOC304758), mRNA [XM_222617]		FALSE
A_44_P325841	0.0373283	0.00337871	0.444643	-0.230773	-0.385561	0.578225	0.509096	NM_024130	Dctn1	Rattus norvegicus dynactin 1 (Dctn1), mRNA [NM_024130]	NM_024130	FALSE
A_44_P520859	0.0338676	0.00259695	-0.560587	-0.857386	-0.246146	0.85384	0.414348	ENSRNOT00000004936	Pkmyt1_predicted	PREDICTED: Rattus norvegicus protein kinase, membrane associated tyrosine [XM_213222]		FALSE
A_44_P409425	0.020908	0.00051957	-0.714905	-0.217035	-0.329101	-1.57751	-1.28644	AI407458	AI407458	AI407458 EST235747 Normalized rat ovary, Bento Soares Rattus sp. cDNA clone ROVDT49 3' end, mRNA sequence [AI407458]	AI407458	FALSE
A_42_P650386	0.020081	0.00035454	-0.220732	-0.438998	-0.681725	0.0619632	0.0920457	NM_001034127	Alg8	Rattus norvegicus asparagine-linked glycosylation 8 homolog (yeast, alpha-1,3-glucosyltransferase) (Alg8), mRNA [NM_001034127]	NM_001034127	FALSE
A_44_P1017315	0.0446556	0.00521059	-0.226798	-0.252263	-0.712634	-0.613538	-0.932142	NM_052801	Vhl	Rattus norvegicus von Hippel-Lindau syndrome homolog (Vhl), mRNA [NM_052801]	NM_052801	FALSE
A_44_P316592	0.033789	0.00252014	0.0884091	-0.165198	-0.326383	0.328761	0.582736	ENSRNOT00000019761	Pigt_predicted	PREDICTED: Rattus norvegicus phosphatidylinositol glycan, class T (predicted) (Pigt_predicted), mRNA [XM_215919]		FALSE
A_44_P806297	0.0308652	0.00197578	0.63422	0.159634	0.324207	0.88019	1.14528	XR_005900	LOC365756	PREDICTED: Rattus norvegicus similar to Glyceraldehyde-3-phosphate dehydrogenase (GAPDH) (LOC365756), mRNA [XR_005900]	XR_005900	FALSE
A_44_P591351	0.0482411	0.00620434	-0.296603	-0.471481	-0.548352	-0.0431905	0.131577	DY471341	DY471341	RVL22523 Wackym-Soares normalized rat vestibular cDNA library Rattus norvegicus cDNA 5', mRNA sequence [DY471341]	DY471341	FALSE
A_44_P330726	0.0413766	0.00441038	0.287287	-0.0987605	-0.257128	0.668978	0.551342	ENSRNOT00000027457	Sfrs14_predicted	Rattus norvegicus similar to arginine/serine-rich 14 splicing factor (LOC361126), mRNA [XM_341413]		FALSE
A_44_P397763	0.0366551	0.00323107	-0.118165	-0.755719	-0.652953	0.616408	0.720981	NM_022869	Nolc1	Rattus norvegicus nucleolar and coiled-body phosphoprotein 1 (Nolc1), mRNA [NM_022869]	NM_022869	FALSE
A_44_P144966	0.0303234	0.00188053	0.298133	-0.302583	-0.289738	0.749953	0.945418	ENSRNOT00000014718	Abcf2_predicted	similar to ATP-binding cassette, sub-family F (GCN20), member 2 (predicted) (RGD1563492_predicted), mRNA [Source:RefSeq_dna;Acc:XR_009183] [ENSRNOT00000014718]		FALSE
A_42_P623151	0.0413932	0.00441619	-0.378763	-0.574143	-1.00094	-0.863298	-0.847393	NM_031026	Dncli2	Rattus norvegicus dynein, cytoplasmic, light intermediate polypeptide 2 (Dncli2), mRNA [NM_031026]	NM_031026	FALSE
A_44_P188157	0.0452502	0.0053664	0.000934005	-0.15831	-0.478003	-0.989292	-0.646727	AA925569	AA925569	AA925569 UI-R-A1-er-f-02-0-UI.s1 UI-R-A1 Rattus norvegicus cDNA clone UI-R-A1-er-f-02-0-UI 3' similar to gi [AA925569]	AA925569	FALSE
A_44_P674506	0.018484	0.000186265	-0.135789	-0.533357	-0.786992	-0.0417377	0.0914342	AI599250	AI599250	AI599250 EST250953 Normalized rat embryo, Bento Soares Rattus sp. cDNA clone REMEP51 3' end, mRNA sequence [AI599250]	AI599250	FALSE
A_43_P13337	0.020081	0.000350862	-0.0195962	-0.435327	-0.434059	0.392195	0.662057	NM_138911	Stip1	Rattus norvegicus stress-induced phosphoprotein 1 (Stip1), mRNA [NM_138911]	NM_138911	FALSE
A_44_P1040609	0.0303387	0.00188626	-0.32166	-0.727677	-1.05968	0.148384	-0.0473632	BC099211	Ascc3l1	Rattus norvegicus activating signal cointegrator 1 complex subunit 3-like 1, mRNA (cDNA clone IMAGE:7384540), complete cds. [BC099211]	BC099211	FALSE
A_44_P475932	0.0256092	0.00104942	0.608306	0.316372	0.018579	1.19134	1.2503	NM_001037496	Otud5	Rattus norvegicus OTU domain containing 5 (Otud5), mRNA [NM_001037496]	NM_001037496	FALSE
A_44_P371629	0.0290421	0.00165807	-0.0737456	-0.510711	-0.576276	0.178507	0.296815	AW142568	AW142568	AW142568 EST292820 Normalized rat embryo, Bento Soares Rattus sp. cDNA clone RGIAP74 5' end, mRNA sequence [AW142568]	AW142568	FALSE
A_44_P119127	0.0298001	0.00177114	-0.0484606	-0.263527	-0.262845	0.326375	0.339344	NM_001047906	Bub3	Rattus norvegicus budding uninhibited by benzimidazoles 3 homolog (S. cerevisiae) (Bub3), mRNA [NM_001047906]	NM_001047906	FALSE
A_44_P527985	0.0182041	0.000132436	0.248502	0.117811	-0.231766	-0.851522	-0.559978	BQ782789	BQ782789	UI-R-FF0-cpl-g-06-0-UI.s1 UI-R-FF0 Rattus norvegicus cDNA clone UI-R-FF0-cpl-g-06-0-UI 3', mRNA sequence [BQ782789]	BQ782789	FALSE
A_44_P445536	0.0252802	0.00098155	-0.474929	-0.562934	-0.759316	-0.00671256	0.0530834	XM_241375	Narg1_predicted	PREDICTED: Rattus norvegicus NMDA receptor-regulated gene 1 (predicted) (Narg1_predicted), mRNA [XM_241375]	XM_241375	FALSE
A_42_P561644	0.0475632	0.00604198	-0.534084	-0.13333	-0.188019	-1.02209	-1.05301	NM_172074	Timm10	Rattus norvegicus translocase of inner mitochondrial membrane 10 homolog (yeast) (Timm10), mRNA [NM_172074]	NM_172074	FALSE
A_43_P12540	0.0349475	0.0028557	0.371074	0.0419879	0.0327567	0.533372	0.829647	NM_031143	Dgkz	Rattus norvegicus diacylglycerol kinase zeta (Dgkz), mRNA [NM_031143]	NM_031143	FALSE
A_44_P108028	0.0182041	0.000122116	-0.402358	-0.626867	-0.878137	-0.048362	0.0195932	XM_217271	XM_217271	Rattus norvegicus similar to leucine rich repeat (in FLII) interacting protein 2 (LOC301035), mRNA [XM_217271]	XM_217271	FALSE
A_44_P900924	0.0455873	0.00545662	-0.462056	-0.962323	-1.36098	0.250721	-0.316229	TC609530	TC609530			FALSE
A_44_P459969	0.0386812	0.00375668	0.466272	0.456505	0.161848	-0.628623	-0.579399	AI175709	AI175709	AI175709 EST219272 Normalized rat ovary, Bento Soares Rattus sp. cDNA clone ROVBE13 3' end, mRNA sequence [AI175709]	AI175709	FALSE
A_44_P556929	0.0362111	0.0031592	-0.431395	-0.195055	-0.306209	-1.58162	-1.42628	AA893552	AA893552	AA893552 EST197355 Normalized rat liver, Bento Soares Rattus sp. cDNA clone RLIAD83 3' end, mRNA sequence [AA893552]	AA893552	FALSE
A_44_P392611	0.0183556	0.000159171	0.339579	-0.246482	-0.69539	0.759435	0.861179	BP483835	BP483835	BP483835 Rattus norvegicus pancreatic islet Rattus norvegicus cDNA clone RBC09148 5', mRNA sequence [BP483835]	BP483835	FALSE
A_44_P794770	0.0407758	0.00428022	0.342282	0.0198305	0.147673	0.78363	0.893733	NM_133560	Trak2	Rattus norvegicus trafficking protein, kinesin binding 2 (Trak2), mRNA [NM_133560]	NM_133560	FALSE
A_44_P408187	0.0334885	0.0024651	-0.1919	-0.505649	-0.557262	0.0385047	0.371245	NM_001012144	Tfg	Rattus norvegicus Trk-fused gene (Tfg), mRNA [NM_001012144]	NM_001012144	FALSE
A_44_P240930	0.0436114	0.00500128	0.584163	0.156486	0.143083	0.874209	0.934786	NM_023955	Scamp2	Rattus norvegicus secretory carrier membrane protein 2 (Scamp2), mRNA [NM_023955]	NM_023955	FALSE
A_44_P610320	0.018045	6.23961e-05	0.333035	-0.0322368	-0.202162	-0.133331	-0.0179899	ENSRNOT00000060467	Rab2b	RAB2B, member RAS oncogene family [Source:RefSeq_peptide;Acc:NP_001032734] [ENSRNOT00000060467]		FALSE
A_44_P632415	0.0222712	0.000684004	-0.0871953	-0.391946	-0.462644	0.0029794	0.225919	XM_001054856	LOC679203	PREDICTED: Rattus norvegicus similar to Negative elongation factor D (NELF-D) (TH1-like protein), transcript variant 2 (LOC679203), mRNA [XM_001054856]	XM_001054856	FALSE
A_44_P605767	0.0233161	0.000784475	-0.115272	-0.565027	-0.870501	0.655594	0.592816	ENSRNOT00000000865	ENSRNOT00000000865	similar to male-enhanced antigen-2 (predicted) (RGD1565361_predicted), mRNA [Source:RefSeq_dna;Acc:XR_008591] [ENSRNOT00000000865]		FALSE
A_44_P388497	0.0231147	0.000769765	-0.101776	-0.158777	-0.418058	-0.673869	-0.816676	BF283661	BF283661	BF283661 EST448252 Rat Gene Index, normalized rat, Rattus norvegicus cDNA Rattus norvegicus cDNA clone RGIEF18 3' sequence, mRNA sequence [BF283661]	BF283661	FALSE
A_43_P20802	0.0458302	0.00552115	-0.00921667	-0.254759	-0.270603	0.307191	0.521406	ENSRNOT00000001709	ENSRNOT00000001709	Rattus norvegicus similar to mitotic checkpoint protein (LOC288509), mRNA [XM_221952]		FALSE
A_44_P463530	0.0294903	0.00173222	-0.211169	-0.59168	-0.513801	0.137332	0.678815	NM_145081	Optn	Rattus norvegicus optineurin (Optn), mRNA [NM_145081]	NM_145081	FALSE
A_44_P890247	0.0330476	0.00236342	0.186718	-0.833479	-1.02528	1.75996	1.25729	BE098727	BE098727	BE098727 UI-R-BJ1-atd-c-03-0-UI.s1 UI-R-BJ1 Rattus norvegicus cDNA clone UI-R-BJ1-atd-c-03-0-UI 3', mRNA sequence [BE098727]	BE098727	FALSE
A_44_P998128	0.0190847	0.00026697	0.23735	-0.259985	-0.0823892	0.804067	0.956195	ENSRNOT00000009033	Brd3_predicted	Rattus norvegicus similar to Brd3 protein (LOC362092), mRNA [XM_342396]		FALSE
A_44_P664495	0.0493829	0.00651023	0.222566	0.185175	-0.274887	-0.548211	-0.492397	XM_235609	Prickle1	PREDICTED: Rattus norvegicus prickle-like 1 (Drosophila), transcript variant 2 (Prickle1), mRNA [XM_235609]	XM_235609	FALSE
A_44_P454591	0.0465047	0.0056933	-0.267276	-0.58905	-0.908758	-0.306712	-0.358998	ENSRNOT00000002036	RGD1310304_predicted	PREDICTED: Rattus norvegicus similar to KIAA1838 protein (predicted) (RGD1310304_predicted), mRNA [XM_218006]		FALSE
A_44_P158899	0.027534	0.00137221	0.310501	-0.456136	-0.690704	0.549276	0.0698454	NM_012736	Gpd2	Rattus norvegicus glycerol-3-phosphate dehydrogenase 2, mitochondrial (Gpd2), mRNA [NM_012736]	NM_012736	FALSE
A_43_P14796	0.0256092	0.00105494	0.308867	-0.219773	-0.0904474	-0.85478	-1.46586	XM_001063452	LOC682861	PREDICTED: Rattus norvegicus similar to adenomatosis polyposis coli down-regulated 1 (LOC682861), mRNA [XM_001063452]	XM_001063452	FALSE
A_44_P415412	0.0393157	0.0039317	0.0475939	-0.43055	-0.416746	0.407018	0.738469	NM_001004252	Farslb	Rattus norvegicus phenylalanine-tRNA synthetase-like, beta subunit (Farslb), mRNA [NM_001004252]	NM_001004252	FALSE
A_44_P229430	0.0203907	0.000403178	0.774625	0.403908	-0.180214	0.636846	0.84976	ENSRNOT00000051653	Aggf1	Aggf1 protein (Fragment). [Source:Uniprot/SPTREMBL;Acc:Q499U9] [ENSRNOT00000051653]		FALSE
A_44_P463480	0.0242773	0.000863147	0.385678	0.033049	0.144913	0.565632	0.700613	NM_181379	Ppp2r5b	Rattus norvegicus protein phosphatase 2, regulatory subunit B (B56), beta isoform (Ppp2r5b), mRNA [NM_181379]	NM_181379	FALSE
A_44_P281482	0.0203907	0.00039403	0.381494	-0.186892	-0.977005	-1.89524	-2.70036	XM_216212	Chchd6_predicted	PREDICTED: Rattus norvegicus coiled-coil-helix-coiled-coil-helix domain containing 6 (predicted) (Chchd6_predicted), mRNA [XM_216212]	XM_216212	FALSE
A_44_P1005933	0.0220056	0.000614633	-0.0623871	0.0976818	-0.263801	-0.621398	-0.729546	NM_001024266	Lztfl1	Rattus norvegicus leucine zipper transcription factor-like 1 (Lztfl1), mRNA [NM_001024266]	NM_001024266	FALSE
A_44_P508906	0.0291491	0.00167099	-0.207051	1.09497	1.25412	-0.676971	-0.689757	XM_343652	XM_343652	Rattus norvegicus similar to RIKEN cDNA 4933431D05 (LOC363312), mRNA [XM_343652]	XM_343652	FALSE
A_43_P19941	0.0158102	2.04762e-05	0.401771	0.131037	-0.185865	-1.01083	-0.883931	NM_001013857	Lrrc48	Rattus norvegicus leucine rich repeat containing 48 (Lrrc48), mRNA [NM_001013857]	NM_001013857	FALSE
A_43_P15508	0.0243559	0.000883964	-0.14068	-0.236974	-0.646939	-1.24601	-1.19234	NM_031094	Rbl2	Rattus norvegicus retinoblastoma-like 2 (Rbl2), mRNA [NM_031094]	NM_031094	FALSE
A_44_P437966	0.0378983	0.0035836	-0.173378	-0.0116444	-0.215677	-1.1746	-0.590344	NM_017170	Apcs	Rattus norvegicus serum amyloid P-component (Apcs), mRNA [NM_017170]	NM_017170	FALSE
A_44_P564121	0.0330573	0.00237699	-0.377486	-0.638627	-0.75376	0.029761	0.0683732	TC582084	TC582084	Q3TBD8_MOUSE (Q3TBD8) NOD-derived CD11c +ve dendritic cells cDNA, RIKEN full-length enriched library, clone:F630327B08 product:Rho-related BTB domain containing 2, full insert sequence, partial (3%) [TC582084]		FALSE
A_44_P869559	0.0412723	0.00439122	-0.241063	-1.58556	-1.46218	-0.397872	-0.628462	TC610861	TC610861			FALSE
A_44_P421625	0.0470143	0.0058473	-0.131234	-0.572082	-0.752167	0.171854	0.245198	NM_031583	Cspg6	Rattus norvegicus chondroitin sulfate proteoglycan 6 (Cspg6), mRNA [NM_031583]	NM_031583	FALSE
A_44_P462306	0.0332498	0.00241618	-0.422909	-0.659114	-1.01849	0.144878	0.475536	CV115642	CV115642	AGENCOURT_31538586 NIH_MGC_270 Rattus norvegicus cDNA clone IMAGE:7442439 5', mRNA sequence [CV115642]	CV115642	FALSE
A_44_P278688	0.020081	0.00035658	-0.219607	-0.286808	-0.48866	-0.0721382	0.0602373	NM_053682	Yme1l1	Rattus norvegicus YME1-like 1 (S. cerevisiae) (Yme1l1), mRNA [NM_053682]	NM_053682	FALSE
A_44_P548812	0.0208809	0.000493363	0.365137	0.0577609	0.06782	0.538794	0.86929	ENSRNOT00000022670	RGD1305553_predicted	PREDICTED: Rattus norvegicus similar to 1200003M09Rik protein (predicted) (RGD1305553_predicted), mRNA [XM_220236]		FALSE
A_44_P960566	0.0360807	0.00314456	-0.240402	-1.10786	-1.30766	0.301669	0.422866	TC597870	TC597870			FALSE
A_42_P725303	0.0260682	0.00111755	-0.0797615	-0.394242	-0.528642	0.153843	0.2252	NM_001033889	Cog7	Rattus norvegicus component of oligomeric golgi complex 7 (Cog7), mRNA [NM_001033889]	NM_001033889	FALSE
A_44_P169789	0.0314978	0.00209758	0.35351	0.0145504	-0.248481	-0.548517	-0.629632	AA965181	AA965181	AA965181 UI-R-C0-hc-b-12-0-UI.s1 UI-R-C0 Rattus norvegicus cDNA clone UI-R-C0-hc-b-12-0-UI 3', mRNA sequence [AA965181]	AA965181	FALSE
A_44_P883154	0.018484	0.000212182	-0.0264522	-0.299462	-0.533904	-0.0381441	0.114213	NM_019149	Matr3	Rattus norvegicus matrin 3 (Matr3), mRNA [NM_019149]	NM_019149	FALSE
A_44_P165466	0.0467295	0.00577318	0.16942	-0.452812	-1.003	0.0952317	0.22312	XM_001074246	Ash1l_predicted	PREDICTED: Rattus norvegicus ash1 (absent, small, or homeotic)-like (Drosophila) (predicted) (Ash1l_predicted), mRNA [XM_001074246]	XM_001074246	FALSE
A_43_P10988	0.0498745	0.00664281	-0.368177	-0.0672176	-0.241091	-0.740301	-0.720189	XM_341127	Nek7_predicted	PREDICTED: Rattus norvegicus NIMA (never in mitosis gene a)-related expressed kinase 7 (predicted) (Nek7_predicted), mRNA [XM_341127]	XM_341127	FALSE
A_44_P186787	0.0239431	0.000837491	-0.0781574	0.166649	0.221555	-0.475536	-0.67065	AA799778	AA799778	AA799778 EST189275 Normalized rat heart, Bento Soares Rattus sp. cDNA clone RHEAF23 3' end, mRNA sequence [AA799778]	AA799778	FALSE
A_44_P405443	0.0292538	0.00168737	0.207591	-0.219319	-0.22349	0.582197	0.719547	NM_001031655	Manba	Rattus norvegicus mannosidase, beta A, lysosomal (Manba), mRNA [NM_001031655]	NM_001031655	FALSE
A_44_P109680	0.0432036	0.00484296	-0.022269	-0.048248	-0.497615	0.0573555	0.208951	U78140	U78140	RNU78140 Rattus norvegicus zinc finger protein 12 (DZF12) mRNA, partial cds [U78140]	U78140	FALSE
A_44_P929423	0.0380471	0.00360879	-0.119544	-0.825248	-1.09371	0.31921	-0.361384	XM_001061864	LOC685004	PREDICTED: Rattus norvegicus similar to integrin alpha 9 (LOC685004), mRNA [XM_001061864]	XM_001061864	FALSE
A_44_P1021844	0.0286631	0.00156692	0.00746453	-0.0280179	-0.14268	0.502961	0.817405	XR_007342	RGD1308489_predicted	PREDICTED: Rattus norvegicus similar to hypothetical protein (predicted) (RGD1308489_predicted), mRNA [XR_007342]	XR_007342	FALSE
A_44_P132614	0.018117	8.12283e-05	-0.400843	-0.892331	-1.09265	1.01256	0.832559	NM_031148	Slc20a1	Rattus norvegicus solute carrier family 20 (phosphate transporter), member 1 (Slc20a1), mRNA [NM_031148]	NM_031148	FALSE
A_44_P622236	0.0322931	0.00221349	-0.0463963	-0.627904	-1.14543	0.232588	0.353583	TC629865	TC629865			FALSE
A_44_P543752	0.0389079	0.00382287	0.470518	0.579979	0.664724	-0.37194	-0.327289	A_44_P543752	A_44_P543752			FALSE
A_44_P404567	0.0206599	0.000457971	0.697391	0.217475	0.27359	1.22964	1.46067	NM_022516	Ptbp1	Rattus norvegicus polypyrimidine tract binding protein 1 (Ptbp1), transcript variant 2, mRNA [NM_022516]	NM_022516	FALSE
A_44_P295548	0.0256092	0.0010508	0.529249	-0.00149846	0.292128	1.04624	1.30779	XR_006879	LOC315007	PREDICTED: Rattus norvegicus similar to Glyceraldehyde-3-phosphate dehydrogenase (GAPDH) (LOC315007), mRNA [XR_006879]	XR_006879	FALSE
A_44_P576289	0.0434778	0.00491395	-0.0279766	-0.293293	-0.234218	0.966754	1.16997	BC088330	BC088330	Rattus norvegicus cDNA clone IMAGE:7365681 [BC088330]	BC088330	FALSE
A_44_P286439	0.0203907	0.000407391	0.902691	0.484428	-0.015125	-0.0509552	-0.422511	NM_001013955	Trim42	Rattus norvegicus tripartite motif-containing 42 (Trim42), mRNA [NM_001013955]	NM_001013955	FALSE
A_44_P181518	0.048057	0.00615683	0.163956	-0.0771449	0.239976	0.338486	0.584562	BC098773	LOC503000	Rattus norvegicus similar to beta-catenin-interacting protein ICAT, mRNA (cDNA clone IMAGE:7373895), complete cds. [BC098773]	BC098773	FALSE
A_44_P1041677	0.0187873	0.000248453	-0.187375	-0.458341	-0.600242	0.265968	0.37867	DV728444	DV728444	RVL21084 Wackym-Soares normalized rat vestibular cDNA library Rattus norvegicus cDNA 5', mRNA sequence [DV728444]	DV728444	FALSE
A_42_P604121	0.0330504	0.00236671	-0.213178	-0.495997	-0.727653	-0.25174	0.157534	NM_001012144	Tfg	Rattus norvegicus Trk-fused gene (Tfg), mRNA [NM_001012144]	NM_001012144	FALSE
[truncated: 908 more rows]
