# Supplementary material for: Analysis of Common and Specific Mechanisms of Liver Function Affected by Nitrotoluene Compounds
Source: PLoS One. 2011 Feb 8;6(2):e14662. doi: 10.1371/journal.pone.0014662 (PMC3035612; doi:10.1371/journal.pone.0014662)
Supplement: Table S5 — A table (supplementary table 5) providing a list of genes that were significantly regulated by 2ADNT at 24 h. (0.02 MB XLSX) [file pone.0014662.s005.xlsx]

## Sheet: 2ADNT24h
Supplementary table 5 Significantly regulated genes by 2ADNT at 24h
ProbeName	Corrected p-value	p-value	[RatL2ADNT24h_C](normalized)	[RatL2ADNT24h_4.4](normalized)	[RatL2ADNT24h_44](normalized)	[RatL2ADNT24h_87](normalized)	[RatL2ADNT24h_174](normalized)	Common name	GeneSymbol	Description	GenbankAccession	ControlType
A_42_P572725	0.000912989	1.19034e-06	-2.13323	-2.06436	-0.153946	0.971666	0.601036	NM_080581	Abcc3	Rattus norvegicus ATP-binding cassette, sub-family C (CFTR/MRP), member 3 (Abcc3), mRNA [NM_080581]	NM_080581	FALSE
A_42_P673309	0.0164089	8.55743e-05	-0.856057	-0.989284	-0.357605	0.294452	0.0707219	NM_001037788	Styxl1	Rattus norvegicus serine/threonine/tyrosine interacting-like 1 (Styxl1), mRNA [NM_001037788]	NM_001037788	FALSE
A_43_P10259	0.030041	0.000362294	-0.493637	-0.373187	0.191429	0.908864	0.292968	TC623960	TC623960	Q6AY36_RAT (Q6AY36) Coronin, actin binding protein 2A (Predicted), partial (20%) [TC623960]		FALSE
A_43_P10931	0.00537732	1.57744e-05	-0.115084	0.0282041	-0.665664	-1.27899	-0.990776	XM_001065526	Gpr68_predicted	PREDICTED: Rattus norvegicus G protein-coupled receptor 68 (predicted) (Gpr68_predicted), mRNA [XM_001065526]	XM_001065526	FALSE
A_43_P11754	0.000801221	7.83463e-07	-0.849594	-0.814058	0.393671	1.60277	1.55543	NM_013215	Akr7a3	Rattus norvegicus aldo-keto reductase family 7, member A3 (aflatoxin aldehyde reductase) (Akr7a3), mRNA [NM_013215]	NM_013215	FALSE
A_43_P11776	0.0267218	0.000186436	-0.825972	-0.684562	0.0674939	0.579181	0.784959	NM_017014	Gstm1	Rattus norvegicus glutathione S-transferase, mu 1 (Gstm1), mRNA [NM_017014]	NM_017014	FALSE
A_43_P12404	0.0437318	0.000787632	-0.159027	-0.206718	-0.404175	-0.605821	-0.521644	NM_024147	Evl	Rattus norvegicus Ena-vasodilator stimulated phosphoprotein (Evl), mRNA [NM_024147]	NM_024147	FALSE
A_43_P13297	0.0346145	0.000451297	0.321086	0.363667	-0.302833	-1.83651	-1.91255	NM_138826	Mt1a	Rattus norvegicus metallothionein 1a (Mt1a), mRNA [NM_138826]	NM_138826	FALSE
A_43_P13342	0.0164045	8.02047e-05	-0.999989	-0.849883	-0.199502	-0.074455	0.302631	NM_138974	Gstp2	Rattus norvegicus glutathione S-transferase, pi 2 (Gstp2), mRNA [NM_138974]	NM_138974	FALSE
A_43_P17083	0.00432212	1.12702e-05	-1.35634	-1.06199	-0.0262449	0.614316	0.61115	CB547915	CB547915	CB547915 AMGNNUC:NRHY1-00001-D7-Z W Rat hypothalamus (10480) Rattus norvegicus cDNA clone nrhy1-00001-d7, mRNA sequence [CB547915]	CB547915	FALSE
A_43_P17743	0.0357668	0.000477979	-0.135682	-0.906716	0.123876	0.713864	1.02841	NM_001009474	Pir	Rattus norvegicus pirin (Pir), mRNA [NM_001009474]	NM_001009474	FALSE
A_43_P22401	0.0137819	5.83979e-05	-0.669666	-0.820795	-0.332542	0.137368	0.00276029	ENSRNOT00000027261	RGD1565856_predicted	PREDICTED: Rattus norvegicus similar to Hypothetical 55.1 kDa protein F09G8.5 in chromosome III (predicted) (RGD1565856_predicted), mRNA [XM_215012]		FALSE
A_44_P1002360	0.0208042	0.00013562	-0.790503	-0.710042	-0.155499	0.40565	0.523214	NM_175757	Cryl1	Rattus norvegicus crystallin, lamda 1 (Cryl1), mRNA [NM_175757]	NM_175757	FALSE
A_44_P1007870	0.0417723	0.000650836	-0.719231	-0.565189	-0.175522	0.0444674	0.0467957	XM_215938	Wfdc3_predicted	PREDICTED: Rattus norvegicus WAP four-disulfide core domain 3 (predicted) (Wfdc3_predicted), mRNA [XM_215938]	XM_215938	FALSE
A_44_P1023637	0.000801221	5.31615e-07	-0.181192	-0.554561	1.0854	1.91172	1.92511	NM_001007006	Dusp13	Rattus norvegicus dual specificity phosphatase 13 (Dusp13), mRNA [NM_001007006]	NM_001007006	FALSE
A_44_P1030747	0.0166538	9.52513e-05	-0.504603	-0.294178	0.057662	-0.0145032	0.486822	BC062051	Bspry	Rattus norvegicus B-box and SPRY domain containing, mRNA (cDNA clone IMAGE:5598845), partial cds [BC062051]	BC062051	FALSE
A_44_P121347	0.0437318	0.000751767	-0.275324	-0.355168	-0.933652	-2.9139	-2.04043	NM_001009663	Serpina6	Rattus norvegicus serine (or cysteine) proteinase inhibitor, clade A (alpha-1 antiproteinase, antitrypsin), member 6 (Serpina6), mRNA [NM_001009663]	NM_001009663	FALSE
A_44_P152557	0.0294594	0.000345677	-0.53338	-0.455547	-0.0622709	0.120224	-0.0757232	AI170603	AI170603	AI170603 EST216537 Normalized rat muscle, Bento Soares Rattus sp. cDNA clone RMUAY66 3' end, mRNA sequence [AI170603]	AI170603	FALSE
A_44_P168348	0.0294594	0.000313574	0.209104	-0.0105212	-0.314838	-0.621742	-0.472418	A_44_P168348	A_44_P168348			FALSE
A_44_P175376	0.0437318	0.000774674	0.136162	0.0269688	-0.136671	-0.763743	-0.471141	NM_001011975	Aldh1b1	Rattus norvegicus aldehyde dehydrogenase 1 family, member B1 (Aldh1b1), mRNA [NM_001011975]	NM_001011975	FALSE
A_44_P179787	0.000953142	1.55336e-06	-0.503316	-0.659329	0.382734	1.2739	1.02781	NM_199409	Panx2	Rattus norvegicus pannexin 2 (Panx2), mRNA [NM_199409]	NM_199409	FALSE
A_44_P182221	0.0137819	5.112e-05	-0.862375	-0.740193	-0.255197	-0.0871711	0.393564	NM_012577	Gstp1	Rattus norvegicus glutathione-S-transferase, pi 1 (Gstp1), mRNA [NM_012577]	NM_012577	FALSE
A_44_P187503	0.0426587	0.00069522	0.122614	0.0710101	-0.576397	-0.736544	-0.774947	ENSRNOT00000022359	RGD1563994_predicted	Acyltransferase-like 1-A (EC 2.3.1.-). [Source:Uniprot/SWISSPROT;Acc:P0C1Q3] [ENSRNOT00000022359]		FALSE
A_44_P221974	0.000598143	1.94962e-07	-1.70979	-1.72509	0.0828615	1.09282	0.889199	NM_080581	Abcc3	Rattus norvegicus ATP-binding cassette, sub-family C (CFTR/MRP), member 3 (Abcc3), mRNA [NM_080581]	NM_080581	FALSE
A_44_P230723	0.0482078	0.000911361	-0.397212	0.076178	0.448837	0.0461171	-0.587194	AA964141	Trib1	UI-R-E1-gl-f-03-0-UI.s1 UI-R-E1 Rattus norvegicus cDNA clone UI-R-E1-gl-f-03-0-UI 3', mRNA sequence [AA964141]	AA964141	FALSE
A_44_P236378	0.0281179	0.000244092	-0.855336	-0.887666	0.140911	0.176731	0.217862	XR_006653	LOC289672	PREDICTED: Rattus norvegicus similar to Heat shock protein HSP 90-beta (HSP 84) (LOC289672), mRNA [XR_006653]	XR_006653	FALSE
A_44_P261874	0.0281179	0.000225637	-0.504158	-0.680316	0.354778	0.746276	0.687566	NM_175761	Hspca	Rattus norvegicus heat shock protein 1, alpha (Hspca), mRNA [NM_175761]	NM_175761	FALSE
A_44_P281482	0.0281179	0.000251163	-1.15625	-1.11382	-0.180414	-0.0207469	-0.0730368	XM_216212	Chchd6_predicted	PREDICTED: Rattus norvegicus coiled-coil-helix-coiled-coil-helix domain containing 6 (predicted) (Chchd6_predicted), mRNA [XM_216212]	XM_216212	FALSE
A_44_P287194	0.038463	0.000551621	-0.535329	-0.635689	0.276031	0.36637	0.342349	NM_001004082	Hspcb	Rattus norvegicus heat shock 90kDa protein 1, beta (Hspcb), mRNA [NM_001004082]	NM_001004082	FALSE
A_44_P299870	0.0267218	0.000191616	-0.4184	-0.698649	0.326929	0.867906	0.866758	NM_175761	Hspca	Rattus norvegicus heat shock protein 1, alpha (Hspca), mRNA [NM_175761]	NM_175761	FALSE
A_44_P312605	0.0294594	0.000342109	-0.990677	-0.348675	0.155468	0.374541	1.39688	BG153336	BG153336	BG153336 nag12g06.x1 NCI_CGAP_Emb2 Rattus norvegicus cDNA clone IMAGE:4176179 3' similar to TR:O95474 O95474 INI1B PROTEIN. [1] ;, mRNA sequence [BG153336]	BG153336	FALSE
A_44_P321009	0.0056078	1.82783e-05	-0.247492	-0.459462	2.93622	5.33289	4.9928	NM_012540	Cyp1a1	Rattus norvegicus cytochrome P450, family 1, subfamily a, polypeptide 1 (Cyp1a1), mRNA [NM_012540]	NM_012540	FALSE
A_44_P325285	0.0166538	9.77081e-05	-0.952656	-1.01215	-1.3987	-2.89999	-2.29629	NM_001012122	Ecgf1	Rattus norvegicus endothelial cell growth factor 1 (platelet-derived) (Ecgf1), mRNA [NM_001012122]	NM_001012122	FALSE
A_44_P365286	0.0437318	0.000792339	-0.967933	-0.72667	-0.118469	0.104161	0.14066	NM_022407	Aldh1a1	Rattus norvegicus aldehyde dehydrogenase family 1, member A1 (Aldh1a1), mRNA [NM_022407]	NM_022407	FALSE
A_44_P389493	0.0494509	0.000950978	-0.328367	-0.14145	-0.339493	-1.21863	-0.517768	XM_343740	XM_343740	Rattus norvegicus similar to Ac1262 (LOC363416), mRNA [XM_343740]	XM_343740	FALSE
A_44_P392524	0.00106854	2.08972e-06	0.374781	0.188748	0.599959	0.949511	1.1626	CK600504	CK600504	AGENCOURT_17900747 NIH_MGC_234 Rattus norvegicus cDNA clone IMAGE:7190084 5', mRNA sequence [CK600504]	CK600504	FALSE
A_44_P396496	0.038463	0.000531712	-0.512029	-0.456734	0.147658	0.238713	0.327769	XM_001064248	LOC685545	PREDICTED: Rattus norvegicus hypothetical protein LOC685545 (LOC685545), mRNA [XM_001064248]	XM_001064248	FALSE
A_44_P400591	0.0426587	0.000688601	-0.719313	-0.874405	0.158988	0.521711	0.679303	A_44_P400591	A_44_P400591			FALSE
A_44_P417083	0.00432212	1.07761e-05	-0.729178	-0.569255	0.0301177	0.199313	0.609778	AY325215	Atad1	Rattus norvegicus Ab2-088 mRNA, complete cds. [AY325215]	AY325215	FALSE
A_44_P418944	0.0294594	0.000343704	-0.523099	-0.582622	0.143465	0.197897	0.303425	NM_199394	Entpd5	Rattus norvegicus ectonucleoside triphosphate diphosphohydrolase 5 (Entpd5), mRNA [NM_199394]	NM_199394	FALSE
A_44_P432358	0.0137819	5.66486e-05	-1.43891	-1.41309	-0.0803504	0.263746	0.79484	NM_057105	Ugt1a6	Rattus norvegicus UDP glycosyltransferase 1 family, polypeptide A6 (Ugt1a6), transcript variant 2, mRNA [NM_057105]	NM_057105	FALSE
A_44_P476733	0.0437318	0.000764755	-1.01907	-1.23987	-0.114354	-0.110167	0.760809	NM_017000	Nqo1	Rattus norvegicus NAD(P)H dehydrogenase, quinone 1 (Nqo1), mRNA [NM_017000]	NM_017000	FALSE
A_44_P487856	0.0208042	0.000129724	-0.604416	-0.885262	-1.35183	-3.47723	-2.49643	NM_001012122	Ecgf1	Rattus norvegicus endothelial cell growth factor 1 (platelet-derived) (Ecgf1), mRNA [NM_001012122]	NM_001012122	FALSE
A_44_P503516	0.0414368	0.000621282	-0.645528	-0.345016	0.0301752	0.152606	0.0177835	AF010444	AF010444	Rattus norvegicus MARRLC9A mRNA, partial cds. [AF010444]	AF010444	FALSE
A_44_P534812	0.0281179	0.000235895	-0.400411	-0.399678	0.621763	1.55741	1.41308	NM_001025628	Ropn1	Rattus norvegicus ropporin, rhophilin associated protein 1 (Ropn1), mRNA [NM_001025628]	NM_001025628	FALSE
A_44_P538921	0.038463	0.000545411	-1.03544	-0.922034	-0.21366	-0.298314	-0.307725	XM_001068915	LOC684095	PREDICTED: Rattus norvegicus similar to centrin 4 (LOC684095), mRNA [XM_001068915]	XM_001068915	FALSE
A_44_P591224	0.0294594	0.000310118	-0.389023	-0.355297	-0.144333	-0.0822656	0.00435364	TC601898	TC601898	Q7TQ12_RAT (Q7TQ12) Aa1114, partial (9%) [TC601898]		FALSE
A_44_P591857	0.0325985	0.000414388	-1.13149	-0.163054	0.306174	-0.177395	-1.1247	TC586229	TC586229			FALSE
A_44_P609103	0.027316	0.000204781	-0.817103	-0.719512	-0.257512	-0.0739663	0.0910896	TC638722	TC638722	KCNN1_RAT (P70606) Small conductance calcium-activated potassium channel protein 1 (SK1), complete [TC638722]		FALSE
A_44_P612186	0.0294594	0.000339784	-0.247266	-0.286546	-0.680724	-1.02141	-1.0712	BU760453	BU760453	UI-R-FS1-cqi-n-16-0-UI.s1 UI-R-FS1 Rattus norvegicus cDNA clone UI-R-FS1-cqi-n-16-0-UI 3', mRNA sequence [BU760453]	BU760453	FALSE
A_44_P743168	0.0404758	0.000593681	-0.874579	-0.840508	-0.316402	-0.095181	0.0165105	AI412180	AI412180	AI412180 EST240474 Normalized rat kidney, Bento Soares Rattus sp. cDNA clone RKIEP46 3' end, mRNA sequence [AI412180]	AI412180	FALSE
A_44_P751206	0.0417723	0.000653543	-0.269218	-0.605121	-0.00744092	-0.130771	-0.279117	AI236146	AI236146	AI236146 EST232708 Normalized rat ovary, Bento Soares Rattus sp. cDNA clone ROVDB96 3' end, mRNA sequence [AI236146]	AI236146	FALSE
A_44_P760131	0.0281179	0.000256617	-0.184071	-0.297477	0.840218	1.23721	1.3066	XR_008968	LOC498264	PREDICTED: Rattus norvegicus similar to heat shock protein 1, alpha (LOC498264), mRNA [XR_008968]	XR_008968	FALSE
A_44_P790750	0.0437318	0.000798233	-0.391443	-0.415015	0.155402	0.276527	0.574109	XR_006810	LOC364646	PREDICTED: Rattus norvegicus similar to chaperonin containing TCP1, subunit 6A isoform a (LOC364646), mRNA [XR_006810]	XR_006810	FALSE
A_44_P822051	0.0456829	0.000848737	-0.956624	-0.721287	-0.0984948	-0.054229	-0.0320762	A_44_P822051	A_44_P822051			FALSE
A_44_P822447	0.0294594	0.000307739	-0.0262511	-0.125264	-0.765829	-1.24585	-0.976836	ENSRNOT00000061422	RGD1565540_predicted	AGENCOURT_28451351 NIH_MGC_248 Rattus norvegicus cDNA clone IMAGE:7366758 5', mRNA sequence [CO566172]		FALSE
A_44_P852754	0.0311823	0.000386222	-0.458542	-0.234878	0.226819	0.844132	0.39707	TC576606	TC576606	Q6AY36_RAT (Q6AY36) Coronin, actin binding protein 2A (Predicted), complete [TC576606]		FALSE
A_44_P992908	0.0294594	0.000322075	-0.150048	-0.115521	0.662872	1.34408	1.54173	NM_031970	Hspb1	Rattus norvegicus heat shock 27kDa protein 1 (Hspb1), mRNA [NM_031970]	NM_031970	FALSE
A_44_P994692	0.0145563	6.64236e-05	-0.0815737	0.475024	1.29364	0.666171	2.46105	NM_001012002	Zap70	Rattus norvegicus zeta-chain (TCR) associated protein kinase 70 (Zap70), mRNA [NM_001012002]	NM_001012002	FALSE
