# Supplementary material for: Analysis of Common and Specific Mechanisms of Liver Function Affected by Nitrotoluene Compounds
Source: PLoS One. 2011 Feb 8;6(2):e14662. doi: 10.1371/journal.pone.0014662 (PMC3035612; doi:10.1371/journal.pone.0014662)
Supplement: Table S7 — A table (supplementary table 7) providing a list of genes that were significantly regulated by 4ADNT at 24 h. (0.20 MB XLSX) [file pone.0014662.s007.xlsx]

## Sheet: 4ADNT24h
Supplementary table 7 Significantly regulated genes by 4ADNT at 24h
ProbeName	Corrected p-value	p-value	[RatL4ADNT24h_C](normalized)	[RatL4ADNT24h_4.7](normalized)	[RatL4ADNT24h_47](normalized)	[RatL4ADNT24h_94](normalized)	[RatL4ADNT24h_187](normalized)	Common name	GeneSymbol	Description	GenbankAccession	ControlType
A_44_P375042	0.0469043	0.00220016	-0.242737	0.00194585	0.190906	0.199691	0.633727	NM_001014243	RGD1309888	Rattus norvegicus similar to RIKEN cDNA 1500002O20 (RGD1309888), mRNA [NM_001014243]	NM_001014243	FALSE
A_42_P738337	0.00202926	2.47359e-06	-0.92538	-0.780671	0.864377	2.20494	2.26429	NM_012575	Grin2c	Rattus norvegicus glutamate receptor, ionotropic, NMDA2C (Grin2c), mRNA [NM_012575]	NM_012575	FALSE
A_43_P23108	0.0190383	0.000328335	0.0244221	0.0292023	-0.081201	0.164293	0.788343	NM_001004203	Mcm7	Rattus norvegicus minichromosome maintenance deficient 7 (S. cerevisiae) (Mcm7), mRNA [NM_001004203]	NM_001004203	FALSE
A_44_P280933	0.0228256	0.000453421	-0.0355482	-0.197456	-0.0515033	0.495048	1.28848	ENSRNOT00000001160	Vars2	Valyl-tRNA synthetase (EC 6.1.1.9) (Valine--tRNA ligase) (ValRS). [Source:Uniprot/SWISSPROT;Acc:Q04462] [ENSRNOT00000001160]		FALSE
A_44_P228177	0.0478307	0.00232596	-1.02622	-0.304282	0.300547	-0.510815	-0.622197	AA818520	AA818520	AA818520 UI-R-A0-au-c-10-0-UI.s1 UI-R-A0 Rattus norvegicus cDNA clone UI-R-A0-au-c-10-0-UI 3' similar to gb [AA818520]	AA818520	FALSE
A_44_P1017335	0.0401338	0.00148939	-0.271271	-0.086365	0.33018	0.49284	0.5978	ENSRNOT00000010210	Cse1l_predicted	PREDICTED: Rattus norvegicus chromosome segregation 1-like (S. cerevisiae) (predicted) (Cse1l_predicted), mRNA [XM_342581]		FALSE
A_44_P109278	0.0356172	0.00114784	-1.17914	-0.638822	0.0388155	-0.427452	-0.624347	BM986464	BM986464	BM986464 EST594058 Rat gene index, normalized rat, norvegicus Rattus norvegicus cDNA clone RGOAC50 3' end, mRNA sequence [BM986464]	BM986464	FALSE
A_44_P867949	0.0290924	0.000776235	-0.159232	-0.142135	-0.0273758	0.663721	0.971418	ENSRNOT00000016992	LOC681811	PREDICTED: Rattus norvegicus similar to tubulin, alpha 8 like (LOC685500), mRNA [XR_006205]		FALSE
A_44_P591224	0.0221663	0.00042131	-0.250631	-0.123927	0.141622	0.187106	0.327755	TC601898	TC601898	Q7TQ12_RAT (Q7TQ12) Aa1114, partial (9%) [TC601898]		FALSE
A_43_P22276	0.0443373	0.0019016	-0.0236666	0.0469247	0.234268	-0.0950571	-0.47521	CB547510	CB547510	AMGNNUC:TRBA2-00006-D1-A trba2 (10286) Rattus norvegicus cDNA clone trba2-00006-d1 5', mRNA sequence [CB547510]	CB547510	FALSE
A_44_P525827	0.0212391	0.000393692	-0.0743626	-0.181782	-0.135626	0.672385	1.14469	NM_199091	Cct3	Rattus norvegicus chaperonin subunit 3 (gamma) (Cct3), mRNA [NM_199091]	NM_199091	FALSE
A_44_P465148	0.0122637	0.000140631	0.67852	1.14237	1.62762	0.647	-0.140789	NM_133285	H1f4	Rattus norvegicus H1 histone family, member 4 (H1f4), mRNA [NM_133285]	NM_133285	FALSE
A_43_P15253	0.0405799	0.00152976	-0.873693	-0.507501	-0.353015	-0.213474	0.251483	NM_012967	Icam1	Rattus norvegicus intercellular adhesion molecule 1 (Icam1), mRNA [NM_012967]	NM_012967	FALSE
A_44_P666786	0.0440463	0.00185531	-0.644488	-0.203285	0.468237	0.171925	0.354362	XM_238103	Akt1s1_predicted	PREDICTED: Rattus norvegicus AKT1 substrate 1 (proline-rich) (predicted) (Akt1s1_predicted), mRNA [XM_238103]	XM_238103	FALSE
A_44_P474559	0.0127374	0.000149513	0.527031	0.360938	-0.0590324	0.120199	0.38982	NM_001010968	Eng	Rattus norvegicus endoglin (Eng), mRNA [NM_001010968]	NM_001010968	FALSE
A_42_P766275	0.0236127	0.000493575	-0.598742	-0.58148	-0.344699	0.183135	0.640572	NM_194353	RGD727855	Rattus norvegicus similar to SET (RGD727855), mRNA [NM_194353]	NM_194353	FALSE
A_44_P419141	0.0401386	0.00149717	-0.270908	0.0831768	0.0167857	-0.0741721	0.76752	L06821	Nup153	Rat nuclear pore complex protein mRNA sequence. [L06821]	L06821	FALSE
A_44_P114308	0.0123927	0.000143229	0.563562	0.216403	0.375956	1.62948	2.25389	NM_175761	Hspca	Rattus norvegicus heat shock protein 1, alpha (Hspca), mRNA [NM_175761]	NM_175761	FALSE
A_44_P187213	0.0142092	0.000184752	0.0804938	0.304159	0.325878	0.626009	1.27788	NM_053778	Ipo13	Rattus norvegicus importin 13 (Ipo13), mRNA [NM_053778]	NM_053778	FALSE
A_44_P384772	0.0166535	0.000257363	0.341029	-0.196677	-0.0550106	0.510658	0.898758	XM_233435	LOC313535	PREDICTED: Rattus norvegicus similar to prion protein interacting protein 1 (LOC313535), mRNA [XM_233435]	XM_233435	FALSE
A_44_P506328	0.0186355	0.000318763	-0.164676	-0.220491	-0.149619	0.231875	0.92591	A_44_P506328	A_44_P506328			FALSE
A_44_P193181	0.0263593	0.000611781	0.017895	0.166451	0.646642	0.667902	0.943086	NM_017008	Gapdh	Rattus norvegicus glyceraldehyde-3-phosphate dehydrogenase (Gapdh), mRNA [NM_017008]	NM_017008	FALSE
A_44_P392524	0.0164783	0.000250304	0.151931	-0.397912	0.271324	0.461165	1.3235	CK600504	CK600504	AGENCOURT_17900747 NIH_MGC_234 Rattus norvegicus cDNA clone IMAGE:7190084 5', mRNA sequence [CK600504]	CK600504	FALSE
A_43_P10641	0.0104079	9.7266e-05	-0.57762	-0.514576	0.19647	0.613726	0.744543	XM_215562	Mgst2_predicted	PREDICTED: Rattus norvegicus microsomal glutathione S-transferase 2 (predicted) (Mgst2_predicted), mRNA [XM_215562]	XM_215562	FALSE
A_44_P871648	0.0452092	0.00199614	-0.730408	-0.600949	0.089346	0.0235556	0.173108	NM_001007724	Dcakd	Rattus norvegicus dephospho-CoA kinase domain containing (Dcakd), mRNA [NM_001007724]	NM_001007724	FALSE
A_44_P406474	0.0232128	0.000478927	0.0111287	0.189723	0.559977	1.02202	1.40406	NM_022507	Prkcz	Rattus norvegicus protein kinase C, zeta (Prkcz), mRNA [NM_022507]	NM_022507	FALSE
A_44_P138790	0.0337435	0.00101002	-0.294996	0.164121	-0.18508	-0.550837	-0.563648	NM_031147	Cirbp	Rattus norvegicus cold inducible RNA binding protein (Cirbp), mRNA [NM_031147]	NM_031147	FALSE
A_44_P213415	0.0478307	0.00229952	-0.143721	0.253372	1.03437	0.468401	0.563157	NM_031353	Vdac1	Rattus norvegicus voltage-dependent anion channel 1 (Vdac1), mRNA [NM_031353]	NM_031353	FALSE
A_44_P394808	0.0457192	0.0020781	-0.702691	-0.331185	0.216985	-0.42526	-0.759599	AI236911	AI236911	AI236911 EST233473 Normalized rat ovary, Bento Soares Rattus sp. cDNA clone ROVDM19 3' end, mRNA sequence [AI236911]	AI236911	FALSE
A_44_P346426	0.024167	0.000514921	-0.183593	-0.410115	-0.445387	-0.0953718	0.915416	NM_199410	Wdr12	Rattus norvegicus WD repeat domain 12 (Wdr12), mRNA [NM_199410]	NM_199410	FALSE
A_44_P313516	0.0186117	0.000315432	0.0700716	0.0585026	0.501612	0.39588	0.331395	NM_173100	Bdkrb2	Rattus norvegicus bradykinin receptor, beta 2 (Bdkrb2), mRNA [NM_173100]	NM_173100	FALSE
A_44_P242321	0.00351213	1.12579e-05	-0.0534053	0.220801	0.771823	0.963089	1.62217	NM_130433	Acaa2	Rattus norvegicus acetyl-Coenzyme A acyltransferase 2 (mitochondrial 3-oxoacyl-Coenzyme A thiolase) (Acaa2), mRNA [NM_130433]	NM_130433	FALSE
A_43_P12795	0.0057074	2.856e-05	0.136363	-0.220117	-0.00912845	-0.186627	-0.306101	NM_053403	Grb7	Rattus norvegicus growth factor receptor bound protein 7 (Grb7), mRNA [NM_053403]	NM_053403	FALSE
A_44_P183048	0.00901657	7.57147e-05	-0.387643	-0.539815	-0.813075	0.432319	1.97229	ENSRNOT00000013899	ENSRNOT00000013899	PREDICTED: Rattus norvegicus cytidine 5'-triphosphate synthase (predicted) (Ctps_predicted), mRNA [XM_233467]		FALSE
A_44_P205621	0.0365115	0.00123299	-0.0380603	-0.639924	-0.36073	-0.492976	-0.976911	NM_017108	Kcnh3	Rattus norvegicus potassium voltage-gated channel, subfamily H (eag-related), member 3 (Kcnh3), mRNA [NM_017108]	NM_017108	FALSE
A_44_P456738	0.00128653	1.26049e-06	0.0771304	0.776397	1.32777	1.30055	2.77707	NM_031614	Txnrd1	Rattus norvegicus thioredoxin reductase 1 (Txnrd1), mRNA [NM_031614]	NM_031614	FALSE
A_43_P15662	0.0452092	0.00199516	0.264492	0.427976	0.315548	1.27395	2.73088	XM_340999	Tfrc	PREDICTED: Rattus norvegicus transferrin receptor (Tfrc), mRNA [XM_340999]	XM_340999	FALSE
A_44_P150594	0.00857898	6.85544e-05	-0.212957	-0.255709	0.12821	0.188898	0.687834	NM_030989	Tp53	Rattus norvegicus tumor protein p53 (Tp53), mRNA [NM_030989]	NM_030989	FALSE
A_44_P435996	0.0131504	0.000162351	0.530065	0.137767	0.0790285	0.0606238	-0.192677	XM_344140	Slc41a1_predicted	PREDICTED: Rattus norvegicus solute carrier family 41, member 1 (predicted) (Slc41a1_predicted), mRNA [XM_344140]	XM_344140	FALSE
A_44_P413972	0.0263407	0.000609092	-0.17019	-0.192157	-0.154052	-0.531008	-0.920072	BC099108	BC099108	Rattus norvegicus cDNA clone IMAGE:7461178 [BC099108]	BC099108	FALSE
A_42_P567267	0.0166535	0.000257908	0.764623	1.19737	1.11614	-1.32402	-0.504822	ENSRNOT00000047663	ENSRNOT00000047663	Metallothionein-2 (MT-2) (Metallothionein-II) (MT-II). [Source:Uniprot/SWISSPROT;Acc:P04355] [ENSRNOT00000047663]		FALSE
A_44_P1049242	0.0129177	0.000153608	-0.936657	-0.697365	0.198204	0.0339147	0.102142	ENSRNOT00000051254	Ard1_predicted	PREDICTED: Rattus norvegicus N-acetyltransferase ARD1 homolog (S. cerevisiae) (predicted) (Ard1_predicted), mRNA [XM_343842]		FALSE
A_43_P12580	0.049098	0.00246487	0.17644	0.0674236	0.171163	0.468544	0.668687	NM_031548	Scnn1a	Rattus norvegicus sodium channel, nonvoltage-gated 1 alpha (Scnn1a), mRNA [NM_031548]	NM_031548	FALSE
A_44_P397472	0.029643	0.000801632	-0.765536	-0.682652	0.268365	0.0220896	0.0406668	BQ205131	BQ205131	BQ205131 UI-R-DZ1-cnh-f-09-0-UI.s1 NCI_CGAP_DZ1 Rattus norvegicus cDNA clone IMAGE:7345643 3', mRNA sequence [BQ205131]	BQ205131	FALSE
A_42_P617230	0.0102515	9.3407e-05	-0.58086	-0.45001	-0.169715	0.0063659	0.660068	NM_001025563	Pus1	Rattus norvegicus pseudouridine synthase 1 (Pus1), mRNA [NM_001025563]	NM_001025563	FALSE
A_44_P477047	0.0495146	0.00250814	-0.432334	-0.0389445	0.305263	-0.00596797	0.579275	NM_171983	Spna2	Rattus norvegicus alpha-spectrin 2 (Spna2), mRNA [NM_171983]	NM_171983	FALSE
A_44_P197124	0.0245866	0.000533912	-0.0694827	0.198434	0.565612	0.33039	0.442856	ENSRNOT00000011984	Mtss1_predicted	Rattus norvegicus similar to Actin monomer-binding protein (LOC362918), mRNA [XM_343248]		FALSE
A_44_P788091	0.0229936	0.000461864	-1.68594	-0.610887	0.389124	-0.955938	-1.50913	CK839277	CK839277	UI-R-BJ0p-afe-g-12-0-UI.s10 UI-R-BJ0p Rattus norvegicus cDNA clone UI-R-BJ0p-afe-g-12-0-UI 3', mRNA sequence [CK839277]	CK839277	FALSE
A_44_P334166	0.042535	0.00172978	-1.81954	-1.38703	-0.512969	-1.41382	-1.46782	AA818858	AA818858	AA818858 UI-R-A0-ar-h-08-0-UI.s1 UI-R-A0 Rattus norvegicus cDNA clone UI-R-A0-ar-h-08-0-UI 3' similar to gb [AA818858]	AA818858	FALSE
A_44_P1024714	0.011615	0.000117073	-0.606631	0.149365	1.02687	0.103737	-0.141461	XM_217623	Tbl1x_predicted	PREDICTED: Rattus norvegicus transducin (beta)-like 1 X-linked (predicted) (Tbl1x_predicted), mRNA [XM_217623]	XM_217623	FALSE
A_44_P389462	0.0312738	0.000875384	0.261893	0.175038	0.356426	0.601614	1.00548	ENSRNOT00000004972	Zmym3	Zmym3 protein. [Source:Uniprot/SPTREMBL;Acc:A0JPQ6] [ENSRNOT00000004972]		FALSE
A_44_P806046	0.0389354	0.00136675	0.39294	-0.00758219	-0.096821	0.0250633	0.0641339	A_44_P806046	A_44_P806046			FALSE
A_44_P417083	0.00324596	8.58863e-06	-0.109012	0.0422152	0.094798	0.938161	1.71606	AY325215	Atad1	Rattus norvegicus Ab2-088 mRNA, complete cds. [AY325215]	AY325215	FALSE
A_44_P187083	0.0269913	0.000651934	-0.573102	-0.305456	0.0377682	0.0399848	0.597564	NM_017290	Atp2a2	Rattus norvegicus ATPase, Ca++ transporting, cardiac muscle, slow twitch 2 (Atp2a2), mRNA [NM_017290]	NM_017290	FALSE
A_43_P17880	0.00778011	5.37407e-05	0.0686392	-0.0367112	-0.386307	0.182834	0.571592	NM_182953	Nek6	Rattus norvegicus NIMA (never in mitosis gene a)-related expressed kinase 6 (Nek6), mRNA [NM_182953]	NM_182953	FALSE
A_43_P11472	0.0452888	0.00202368	-0.509158	-0.781236	-1.27023	-0.626	0.0454581	NM_012580	Hmox1	Rattus norvegicus heme oxygenase (decycling) 1 (Hmox1), mRNA [NM_012580]	NM_012580	FALSE
A_44_P198411	0.029016	0.000768315	-0.801994	-0.576428	-0.209859	-0.748934	-0.722336	AA848804	AA848804	AA848804 EST191565 Normalized rat lung, Bento Soares Rattus sp. cDNA clone RLUAG63 3' end, mRNA sequence [AA848804]	AA848804	FALSE
A_43_P17262	0.00168858	1.98208e-06	0.138471	-0.421723	-0.576875	-0.342459	-0.547754	XM_215641	Tmod4_predicted	PREDICTED: Rattus norvegicus tropomodulin 4 (predicted) (Tmod4_predicted), mRNA [XM_215641]	XM_215641	FALSE
A_44_P370798	0.0317463	0.000894245	-0.0137151	0.0483817	0.146104	0.129159	0.376486	XM_343271	XM_343271	Rattus norvegicus similar to leucine-rich repeat-containing F-box protein FBL6 (LOC362941), mRNA [XM_343271]	XM_343271	FALSE
A_44_P173675	0.0441691	0.00187903	-0.339575	-0.540915	-0.517413	-0.072131	0.465137	XM_237816	Chmp6_predicted	PREDICTED: Rattus norvegicus chromatin modifying protein 6 (predicted) (Chmp6_predicted), mRNA [XM_237816]	XM_237816	FALSE
A_42_P775268	0.0224036	0.000437957	0.230004	-0.0672398	-0.360746	0.35645	1.3308	NM_001006974	MGC94720	Rattus norvegicus similar to hypothetical protein MGC2574 (MGC94720), mRNA [NM_001006974]	NM_001006974	FALSE
A_44_P198705	0.018495	0.000309942	-0.546836	-0.507377	-0.686567	-1.45804	-1.8291	NM_012578	H1f0	Rattus norvegicus H1 histone family, member 0 (H1f0), mRNA [NM_012578]	NM_012578	FALSE
A_44_P479600	0.0494997	0.00250515	-1.49137	-1.11592	-0.559956	-1.26839	-1.31107	AA900000	AA900000	AA900000 UI-R-E0-cr-f-05-0-UI.s2 UI-R-E0 Rattus norvegicus cDNA clone UI-R-E0-cr-f-05-0-UI 3' similar to gi [AA900000]	AA900000	FALSE
A_43_P17083	0.0345848	0.00106983	-0.501503	-0.0801129	-0.0106941	0.645066	1.86512	CB547915	CB547915	CB547915 AMGNNUC:NRHY1-00001-D7-Z W Rat hypothalamus (10480) Rattus norvegicus cDNA clone nrhy1-00001-d7, mRNA sequence [CB547915]	CB547915	FALSE
A_44_P506313	0.014606	0.000199361	-0.171879	-0.0241712	-0.391572	0.213745	1.32009	ENSRNOT00000019862	Iars_predicted	Iars_predicted protein (Fragment). [Source:Uniprot/SPTREMBL;Acc:Q5BJR3] [ENSRNOT00000019862]		FALSE
A_44_P324087	0.00573863	3.26441e-05	-0.0576164	0.0356598	0.035835	0.416257	0.652667	ENSRNOT00000037710	Ttll12_predicted	PREDICTED: Rattus norvegicus tubulin tyrosine ligase-like family, member 12 (predicted) (Ttll12_predicted), mRNA [XM_235528]		FALSE
A_44_P325189	0.0156057	0.000227568	-0.681396	-0.482437	-0.024219	-0.184892	0.392226	NM_175578	Dscr1l1	Rattus norvegicus Down syndrome critical region gene 1-like 1 (Dscr1l1), mRNA [NM_175578]	NM_175578	FALSE
A_44_P370355	0.0419895	0.0016701	0.443933	-0.110628	-0.527741	0.146163	1.03324	XR_005817	LOC305639	PREDICTED: Rattus norvegicus similar to heat shock protein 8 (LOC305639), mRNA [XR_005817]	XR_005817	FALSE
A_42_P532458	0.024167	0.000515745	-1.12141	-0.976526	-0.439906	-0.1769	-0.0639296	XM_215701	Papss1_predicted	PREDICTED: Rattus norvegicus 3'-phosphoadenosine 5'-phosphosulfate synthase 1 (predicted) (Papss1_predicted), mRNA [XM_215701]	XM_215701	FALSE
A_44_P1033023	0.0483653	0.00239971	-0.753638	-0.532104	-0.152513	0.121912	0.21218	NM_013063	Parp1	Rattus norvegicus poly (ADP-ribose) polymerase family, member 1 (Parp1), mRNA [NM_013063]	NM_013063	FALSE
A_44_P1011224	0.0166045	0.000254878	-0.322781	0.177708	0.807966	0.38065	0.532614	BC097468	Atp8b2	Rattus norvegicus Atpase, class I, type 8B, member 2, mRNA (cDNA clone IMAGE:7457721), complete cds. [BC097468]	BC097468	FALSE
A_44_P1031034	0.0122475	0.000138098	-0.283379	0.358586	0.884571	0.520129	1.175	NM_031745	Rsn	Rattus norvegicus restin (Reed-Steinberg cell-expressed intermediate filament-associated protein) (Rsn), mRNA [NM_031745]	NM_031745	FALSE
A_44_P257863	0.0119399	0.000130292	0.0381831	0.158159	1.05098	0.973663	1.1818	XR_005505	LOC499644	PREDICTED: Rattus norvegicus similar to heat shock protein 1, beta (LOC499644), mRNA [XR_005505]	XR_005505	FALSE
A_44_P289445	0.0186355	0.000318865	-0.403756	-0.395902	-0.305447	-0.208026	0.501431	NM_001014093	Parp16	Rattus norvegicus poly (ADP-ribose) polymerase family, member 16 (Parp16), mRNA [NM_001014093]	NM_001014093	FALSE
A_44_P108063	0.0410936	0.00155727	0.277887	0.0857719	-0.397827	0.740333	1.32626	NM_001030034	Rhbdf1	Rattus norvegicus rhomboid family 1 (Drosophila) (Rhbdf1), mRNA [NM_001030034]	NM_001030034	FALSE
A_44_P490004	0.0478307	0.00229977	0.37858	0.303321	0.0752313	0.497246	0.614134	NM_001013073	Btbd9	Rattus norvegicus BTB (POZ) domain containing 9 (Btbd9), mRNA [NM_001013073]	NM_001013073	FALSE
A_43_P13297	0.0453721	0.00204021	0.278101	0.700671	0.863041	-1.48892	-1.32029	NM_138826	Mt1a	Rattus norvegicus metallothionein 1a (Mt1a), mRNA [NM_138826]	NM_138826	FALSE
A_44_P992908	0.00203963	2.81897e-06	-0.0371802	-0.148743	1.08117	1.4729	1.61728	NM_031970	Hspb1	Rattus norvegicus heat shock 27kDa protein 1 (Hspb1), mRNA [NM_031970]	NM_031970	FALSE
A_42_P765066	0.00806463	5.7576e-05	0.275968	-0.262804	0.00131321	0.146317	0.173946	NM_021588	Mb	Rattus norvegicus myoglobin (Mb), mRNA [NM_021588]	NM_021588	FALSE
A_44_P361041	0.02833	0.000729034	0.168176	-0.180314	0.14987	-0.149281	-0.24454	ENSRNOT00000041225	ENSRNOT00000041225	similar to UDP-N-acetyl-alpha-D-galactosamine:polypeptide N-acetylgalactosaminyltransferase 12 (LOC685818), mRNA [Source:RefSeq_dna;Acc:XR_006303] [ENSRNOT00000041225]		FALSE
A_44_P386999	0.0478307	0.00234208	0.692661	0.203572	0.475433	0.401882	-0.0426989	XR_007703	RGD1564727_predicted	PREDICTED: Rattus norvegicus similar to actin (predicted) (RGD1564727_predicted), mRNA [XR_007703]	XR_007703	FALSE
A_44_P545649	0.0147851	0.000206411	0.101461	0.0868734	-0.0418426	0.357002	1.2463	NM_001014093	Parp16	Rattus norvegicus poly (ADP-ribose) polymerase family, member 16 (Parp16), mRNA [NM_001014093]	NM_001014093	FALSE
A_42_P802424	0.0222621	0.000427508	0.375704	0.0271271	0.172817	0.159318	-0.176154	NM_013051	Scgb1a1	Rattus norvegicus secretoglobin, family 1A, member 1 (uteroglobin) (Scgb1a1), mRNA [NM_013051]	NM_013051	FALSE
A_44_P481629	0.00503184	2.22628e-05	-0.024178	0.343727	0.836573	0.636862	1.41077	NM_017171	Prkce	Rattus norvegicus protein kinase C, epsilon (Prkce), mRNA [NM_017171]	NM_017171	FALSE
A_44_P199129	0.0057074	3.02276e-05	0.940812	1.68788	1.0759	0.027622	-0.289781	NM_001012084	Adh6	Rattus norvegicus alcohol dehydrogenase 6 (class V) (Adh6), mRNA [NM_001012084]	NM_001012084	FALSE
A_44_P517738	0.0358995	0.00117804	-0.224478	-0.0855594	0.148167	0.324453	0.837226	NM_134330	Keg1	Rattus norvegicus kidney expressed gene 1 (Keg1), mRNA [NM_134330]	NM_134330	FALSE
A_44_P355059	0.0342225	0.00104716	-1.39695	-1.014	-0.461766	-1.51092	-1.87028	AA819118	AA819118	AA819118 UI-R-A0-ba-a-08-0-UI.s1 UI-R-A0 Rattus norvegicus cDNA clone UI-R-A0-ba-a-08-0-UI 3' similar to emb [AA819118]	AA819118	FALSE
A_44_P699666	0.0478307	0.00231584	0.528978	0.688904	1.29763	0.400504	-0.643239	TC618394	TC618394			FALSE
A_44_P948069	0.0367838	0.00124716	-0.00361979	0.176059	0.0911856	0.183595	0.798862	A_44_P948069	A_44_P948069			FALSE
A_43_P12034	0.0176272	0.000282513	0.406693	0.0805504	0.207244	0.121989	-0.147157	NM_019350	Syt5	Rattus norvegicus synaptotagmin V (Syt5), mRNA [NM_019350]	NM_019350	FALSE
A_44_P250065	0.0212391	0.000389386	-0.110708	0.0155369	0.206624	-0.450377	-0.590187	NM_175708	Car11	Rattus norvegicus carbonic anhydrase-related XI protein (CAR-XI), mRNA [NM_175708]	NM_175708	FALSE
A_44_P466507	0.0389354	0.00136651	-0.0487272	-0.512323	-0.723552	0.131213	0.893066	NM_001077672	Cstf3_predicted	Rattus norvegicus cleavage stimulation factor, 3' pre-RNA, subunit 3 (predicted) (Cstf3_predicted), mRNA [NM_001077672]	NM_001077672	FALSE
A_43_P18603	0.0121471	0.000134906	-0.239834	-0.063679	0.276318	-0.00347054	0.146221	ENSRNOT00000024296	Nek4	PREDICTED: Rattus norvegicus NIMA (never in mitosis gene a)-related expressed kinase 4 (Nek4), mRNA [XM_224610]		FALSE
A_44_P327363	0.0356172	0.00114972	-1.3965	-0.695488	-0.0275311	-1.06153	-1.35023	AI029954	AI029954	AI029954 UI-R-C0-ja-g-12-0-UI.s1 UI-R-C0 Rattus norvegicus cDNA clone UI-R-C0-ja-g-12-0-UI 3', mRNA sequence [AI029954]	AI029954	FALSE
A_42_P611561	0.0482055	0.0023896	-0.117566	-0.108449	0.127202	0.328157	0.774562	ENSRNOT00000028413	RGD1308901_predicted	PREDICTED: Rattus norvegicus similar to RIKEN cDNA 1810054G18 (predicted) (RGD1308901_predicted), mRNA [XM_214898]		FALSE
A_43_P13114	0.0057074	3.19433e-05	-0.578405	-0.889869	-0.209491	0.161666	0.551608	NM_130416	Anxa7	Rattus norvegicus annexin A7 (Anxa7), mRNA [NM_130416]	NM_130416	FALSE
A_44_P491393	0.0224506	0.000440886	0.0530907	-0.308295	-0.304871	0.161461	0.980243	ENSRNOT00000015928	Nudt7_predicted	PREDICTED: Rattus norvegicus nudix (nucleoside diphosphate linked moiety X)-type motif 7 (predicted) (Nudt7_predicted), mRNA [XM_341693]		FALSE
A_44_P1003090	0.0273333	0.000667462	0.363868	-0.115121	-0.235056	0.678257	1.35976	NM_199083	LOC289809	Rattus norvegicus putatative 28 kDa protein (LOC289809), mRNA [NM_199083]	NM_199083	FALSE
A_44_P360907	0.0318442	0.000912655	0.319614	-0.164167	-0.175805	-0.187289	-0.221411	A_44_P360907	A_44_P360907			FALSE
A_44_P578390	0.00314519	7.95173e-06	-0.262051	-0.272592	0.010509	0.344729	1.94089	DV729235	DV729235	RVL22024 Wackym-Soares normalized rat vestibular cDNA library Rattus norvegicus cDNA 5', mRNA sequence [DV729235]	DV729235	FALSE
A_44_P255415	0.0167929	0.000263076	-0.458661	0.064929	0.521741	0.223012	0.0327981	ENSRNOT00000008274	ENSRNOT00000008274	PREDICTED: Rattus norvegicus similar to ribosomal protein S12 (LOC682196), mRNA [XM_001060366]		FALSE
A_44_P442951	0.0140295	0.000179881	0.347099	0.183536	1.04252	1.47157	1.62241	XM_344059	XM_344059	Rattus norvegicus similar to hypothetical protein D930020E02 (LOC363850), mRNA [XM_344059]	XM_344059	FALSE
A_44_P419107	0.029016	0.000762095	-0.0235831	-0.37741	-0.536756	-0.137547	0.373854	NM_001047886	Ilf2	Rattus norvegicus interleukin enhancer binding factor 2 (Ilf2), mRNA [NM_001047886]	NM_001047886	FALSE
A_44_P177969	0.0274226	0.000680871	-0.155175	-0.120214	0.385917	0.357375	0.57808	NM_001013875	RGD1311827	Rattus norvegicus similar to RIKEN cDNA 5730411O18 gene (RGD1311827), mRNA [NM_001013875]	NM_001013875	FALSE
A_44_P990043	0.0378407	0.0013088	-0.288752	-0.0407722	0.392611	0.296392	0.780996	ENSRNOT00000027521	Pdcd11_predicted	PREDICTED: Rattus norvegicus programmed cell death protein 11 (predicted) (Pdcd11_predicted), mRNA [XM_219966]		FALSE
A_42_P512460	0.0033351	9.6364e-06	-0.154871	-0.285715	0.0122467	0.443277	1.07928	NM_001037348	MGC125271	Rattus norvegicus JTV1 (MGC125271), mRNA [NM_001037348]	NM_001037348	FALSE
A_44_P158420	0.0122637	0.000139699	-0.262086	-0.421027	0.0771049	0.353147	0.78859	NM_199099	Impdh2	Rattus norvegicus inosine 5-monophosphate dehydrogenase 2 (Impdh2), mRNA [NM_199099]	NM_199099	FALSE
A_44_P306586	0.0274226	0.000680408	0.873223	0.334521	0.453381	0.203452	-0.106329	NM_001024805	Hbe2_predicted	Rattus norvegicus hemoglobin, epsilon 2 (predicted) (Hbe2_predicted), mRNA [NM_001024805]	NM_001024805	FALSE
A_44_P336608	0.0393306	0.00141697	-0.22446	-0.156998	0.536419	0.54321	0.536782	BI395586	BI395586	BI395586 EST531457 Rat gene index, normalized rat, norvegicus Rattus norvegicus cDNA clone RGIBQ76 5' end, mRNA sequence [BI395586]	BI395586	FALSE
A_44_P444378	0.00723853	4.62717e-05	-1.15399	-1.16465	-0.0801631	-0.856772	-0.89315	BI295601	BI295601	BI295601 UI-R-DK0-cek.1-c-11-0-UI.s2 UI-R-DK0 Rattus norvegicus cDNA clone UI-R-DK0-cek.1-c-11-0-UI 3', mRNA sequence [BI295601]	BI295601	FALSE
A_44_P342671	0.00543822	2.52883e-05	-0.0877517	-0.392981	-0.00769913	1.15958	1.74961	XM_234728	XM_234728	Rattus norvegicus similar to Hspca protein (LOC314540), mRNA [XM_234728]	XM_234728	FALSE
A_44_P1036430	0.0304195	0.000841857	-0.105317	-0.438198	-0.295947	0.277863	0.922515	NM_001008301	Usp14	Rattus norvegicus ubiquitin specific protease 14 (Usp14), mRNA [NM_001008301]	NM_001008301	FALSE
A_43_P15154	0.0452185	0.00200313	-0.795092	-0.467274	-0.309482	-1.09886	-1.49915	XM_576589	Ihh	PREDICTED: Rattus norvegicus Indian hedgehog homolog, (Drosophila) (Ihh), mRNA [XM_576589]	XM_576589	FALSE
A_44_P109503	0.0233297	0.000485553	0.266212	0.128859	-0.111517	-0.330002	-0.593162	NM_138517	Gzmb	Rattus norvegicus granzyme B (Gzmb), mRNA [NM_138517]	NM_138517	FALSE
A_42_P648200	0.00542608	2.49869e-05	-0.306891	-0.161195	0.0892442	0.547677	1.39611	NM_001037356	MGC125015	Rattus norvegicus similar to PAK/PLC-interacting protein 1 (MGC125015), mRNA [NM_001037356]	NM_001037356	FALSE
A_44_P411635	0.0487603	0.00243471	0.0338864	0.483738	0.915847	0.124939	0.232269	NM_001037782	Cnot4	Rattus norvegicus CCR4-NOT transcription complex, subunit 4 (Cnot4), mRNA [NM_001037782]	NM_001037782	FALSE
A_44_P299380	0.0356172	0.00113123	0.328827	-0.0824003	-0.0286506	-0.0520691	-0.163936	NM_001000009	Olr1416_predicted	Rattus norvegicus olfactory receptor 1416 (predicted) (Olr1416_predicted), mRNA [NM_001000009]	NM_001000009	FALSE
A_44_P414170	0.0478307	0.00231586	-0.540076	-0.434584	0.190706	-0.1344	0.145636	NM_207592	Gpi	Rattus norvegicus glucose phosphate isomerase (Gpi), mRNA [NM_207592]	NM_207592	FALSE
A_44_P1034486	0.0441691	0.00188489	-0.621876	-0.44262	0.205265	0.119732	0.194278	NM_001007629	NTF2	Rattus norvegicus nuclear transport factor 2 (NTF2), mRNA [NM_001007629]	NM_001007629	FALSE
A_44_P421897	0.0431463	0.00178234	0.283305	0.00647789	0.429833	-0.0781753	-0.189916	XR_006466	LOC294985	PREDICTED: Rattus norvegicus similar to 3-phosphoglycerate dehydrogenase (LOC294985), mRNA [XR_006466]	XR_006466	FALSE
A_44_P1036685	0.0464088	0.00213613	-0.378851	-0.31929	0.209571	0.331331	0.614509	NM_001029900	Mrpl12	Rattus norvegicus ribosomal protein, mitochondrial, L12 (Mrpl12), mRNA [NM_001029900]	NM_001029900	FALSE
A_43_P18091	0.0139781	0.000177961	-0.866726	-0.632103	-0.214165	-0.269937	0.248113	NM_001007707	Brp16	Rattus norvegicus brain protein 16 (Brp16), mRNA [NM_001007707]	NM_001007707	FALSE
A_44_P536769	0.0212391	0.00039425	0.228487	0.428373	0.491858	-0.714035	-0.892806	ENSRNOT00000026227	RGD1565118_predicted	Rattus norvegicus similar to KIAA0843 protein (LOC307395), mRNA [XM_225889]		FALSE
A_44_P483197	0.0421121	0.00168208	0.377872	-0.402686	0.185036	-0.173389	-0.419521	ENSRNOT00000026736	Arid3b_predicted	Rattus norvegicus similar to dead ringer-like 2; dead ringer drosophila homolog 2; bright and dead ringer homolog (LOC367092), mRNA [XM_345945]		FALSE
A_44_P1057585	0.0283359	0.000734933	-0.00181234	-0.270242	-0.373159	0.339815	1.36824	ENSRNOT00000036258	Htatip2_predicted	PREDICTED: Rattus norvegicus HIV-1 tat interactive protein 2, homolog (human) (predicted) (Htatip2_predicted), mRNA [XM_214927]		FALSE
A_44_P434158	0.0185537	0.000313276	0.089101	0.029018	0.0433556	0.314104	0.58195	NM_001011897	Alg3	Rattus norvegicus asparagine-linked glycosylation 3 homolog (yeast, alpha-1,3-mannosyltransferase) (Alg3), mRNA [NM_001011897]	NM_001011897	FALSE
A_42_P514501	0.000760619	4.12074e-07	0.448748	-0.108887	-0.0618254	-0.0710598	-0.273506	M92076	Grm3	Rat metabotropic glutamate receptor 3 mRNA, primary transcript. [M92076]	M92076	FALSE
A_44_P107949	0.0057074	3.02212e-05	-0.717874	-0.669311	-0.387801	-0.18653	0.363456	ENSRNOT00000011960	Dnajc11_predicted	Rattus norvegicus similar to hypothetical protein FLJ10737 (LOC362666), mRNA [XM_342983]		FALSE
A_43_P19334	0.0268046	0.000631693	0.642654	0.0541891	0.10469	0.179006	-0.00572705	NM_212536	Msh5	Rattus norvegicus mutS homolog 5 (E. coli) (Msh5), mRNA [NM_212536]	NM_212536	FALSE
A_44_P338068	0.0452888	0.00202679	0.100577	0.419158	0.249003	0.575542	1.21124	NM_001024355	LOC500909	Rattus norvegicus similar to hypothetical protein FLJ22349 (LOC500909), mRNA [NM_001024355]	NM_001024355	FALSE
A_44_P135224	0.00502515	2.14964e-05	0.381559	0.083015	0.23064	0.313664	1.91366	ENSRNOT00000025197	Plk3	Serine/threonine-protein kinase PLK3 (EC 2.7.11.21) (Polo-like kinase 3) (PLK-3) (Cytokine-inducible serine/threonine-protein kinase) (FGF- inducible kinase) (Fragment). [Source:Uniprot/SWISSPROT;Acc:Q9R011] [ENSRNOT00000025197]		FALSE
A_44_P867355	0.0232128	0.000478867	-0.685966	-0.422051	0.570981	-0.0303179	-0.275906	ENSRNOT00000027998	ENSRNOT00000027998	RIKEN cDNA 2200002D01 gene [Source:MarkerSymbol;Acc:MGI:1919525] [ENSRNOT00000027998]		FALSE
A_44_P135549	0.0140295	0.000179679	0.200392	0.0568609	0.0248141	0.418567	0.96688	NM_001044239	Ap1m1	Rattus norvegicus adaptor-related protein complex AP-1, mu subunit 1 (Ap1m1), mRNA [NM_001044239]	NM_001044239	FALSE
A_44_P192117	0.040487	0.0015204	0.0360401	-0.0827069	-0.279296	0.498127	0.852692	CB579022	CB579022	AMGNNUC:SRCS1-00004-C10-A srcs1 (10883) Rattus norvegicus cDNA clone srcs1-00004-c10 5', mRNA sequence [CB579022]	CB579022	FALSE
A_44_P292327	0.0393392	0.00142783	-0.533852	-0.390419	0.578485	1.0682	1.32447	NM_017006	G6pdx	Rattus norvegicus glucose-6-phosphate dehydrogenase X-linked (G6pdx), mRNA [NM_017006]	NM_017006	FALSE
A_44_P467957	0.041636	0.00161093	-1.44848	-0.622564	0.384404	-0.791864	-1.10739	AA945583	AA945583	AA945583 EST201082 Normalized rat liver, Bento Soares Rattus sp. cDNA clone RLIAP30 3' end, mRNA sequence [AA945583]	AA945583	FALSE
A_44_P922379	0.0497567	0.00252812	0.108958	-0.117654	0.0610836	0.275945	0.577269	ENSRNOT00000054942	LOC688313	PREDICTED: Rattus norvegicus similar to alveolar soft part sarcoma chromosome region, candidate 1 long isoform (LOC691026), mRNA [XM_001076577]		FALSE
A_44_P314312	0.0057074	2.82374e-05	0.190622	0.071681	0.0405047	0.282392	1.67193	ENSRNOT00000013535	Nol9	Nol9 protein (Fragment). [Source:Uniprot/SPTREMBL;Acc:Q4G021] [ENSRNOT00000013535]		FALSE
A_43_P19450	0.00227678	4.7283e-06	-0.0921836	-0.0933533	0.12916	0.448575	0.524855	ENSRNOT00000004699	Prkca	Protein kinase C alpha type (EC 2.7.11.13) (PKC-alpha) (PKC-A). [Source:Uniprot/SWISSPROT;Acc:P05696] [ENSRNOT00000004699]		FALSE
A_44_P529240	0.0358995	0.0011794	-0.268372	-0.285525	-0.0788945	0.440758	0.658414	NM_183054	Rhbg	Rattus norvegicus Rhesus blood group-associated B glycoprotein (Rhbg), mRNA [NM_183054]	NM_183054	FALSE
A_42_P573296	0.0433585	0.00179502	-0.522601	-0.368146	0.490997	-0.325574	-0.254389	NM_017016	Hdc	Rattus norvegicus histidine decarboxylase (Hdc), mRNA [NM_017016]	NM_017016	FALSE
A_44_P288481	0.00128653	1.13994e-06	-0.0328395	-0.0488374	-0.106676	0.584913	1.94387	ENSRNOT00000037142	Heatr1_predicted	PREDICTED: Rattus norvegicus HEAT repeat containing 1 (predicted) (Heatr1_predicted), mRNA [XM_341546]		FALSE
A_44_P237886	0.0269913	0.000651231	-0.438252	-0.173661	0.182578	0.299561	0.53592	NM_031353	Vdac1	Rattus norvegicus voltage-dependent anion channel 1 (Vdac1), mRNA [NM_031353]	NM_031353	FALSE
A_44_P419827	0.014606	0.000200644	-0.466498	-0.765883	-0.958831	-0.431363	-0.0648621	ENSRNOT00000008566	Mtmr2_predicted	Rattus norvegicus similar to Myotubularin-related protein 2 (LOC315422), mRNA [XM_235822]		FALSE
A_44_P667382	0.0446741	0.00193323	-0.35886	-0.571121	-0.675683	-0.203645	0.380257	ENSRNOT00000005432	ENSRNOT00000005432			FALSE
A_44_P269078	0.0382678	0.00133203	0.140078	-0.00909042	0.225647	0.715517	1.01217	NM_012670	Tcp1	Rattus norvegicus t-complex protein 1 (Tcp1), mRNA [NM_012670]	NM_012670	FALSE
A_44_P239331	0.0104255	9.80279e-05	-2.02219	-1.16708	-0.5607	-2.03997	-2.9738	BF398399	BF398399	BF398399 UI-R-BS2-beo-d-06-0-UI.s1 UI-R-BS2 Rattus norvegicus cDNA clone UI-R-BS2-beo-d-06-0-UI 3', mRNA sequence [BF398399]	BF398399	FALSE
A_44_P107423	0.0439558	0.0018396	0.139927	-0.0155243	-0.340544	0.0540458	0.970867	L06821	Nup153	Rat nuclear pore complex protein mRNA sequence. [L06821]	L06821	FALSE
A_43_P17816	0.00399105	1.40543e-05	-0.448416	-0.216321	-0.0899566	0.266319	0.518865	NM_199120	Cdv1	Rattus norvegicus carnitine deficiency-associated gene expressed in ventricle 1 (Cdv1), mRNA [NM_199120]	NM_199120	FALSE
A_44_P1008950	0.0475426	0.00226416	-0.196787	-0.190004	0.38114	0.621801	0.762161	NM_001013880	LOC290651	Rattus norvegicus similar to myo-inositol 1-phosphate synthase A1 (LOC290651), mRNA [NM_001013880]	NM_001013880	FALSE
A_44_P358444	0.0417333	0.00161658	0.0774912	0.0256937	-0.00211954	-0.312307	-0.435759	ENSRNOT00000010427	Wnt2	Wingless-type MMTV integration site family member 2 (Fragment). [Source:Uniprot/SPTREMBL;Acc:Q99MC2] [ENSRNOT00000010427]		FALSE
A_44_P238246	0.0122475	0.000138172	-0.0123416	-0.031713	0.241495	0.153255	0.474441	NM_053412	Ilf3	Rattus norvegicus interleukin enhancer binding factor 3 (Ilf3), mRNA [NM_053412]	NM_053412	FALSE
A_44_P466041	0.0380599	0.00132118	0.200706	0.296758	0.328578	0.504226	0.701522	NM_001007682	Thtpa	Rattus norvegicus thiamine triphosphatase (Thtpa), mRNA [NM_001007682]	NM_001007682	FALSE
A_44_P506392	0.0499942	0.00255275	0.30295	0.0201731	-0.261515	0.762268	1.50621	ENSRNOT00000024753	Abce1	PREDICTED: Rattus norvegicus ATP-binding cassette, sub-family E (OABP), member 1 (Abce1), mRNA [XM_341669]		FALSE
A_44_P840798	0.0152949	0.000219583	-0.367504	-0.184371	0.00789285	0.214166	0.47182	XM_232735	Eya3_predicted	PREDICTED: Rattus norvegicus eyes absent 3 homolog (Drosophila) (predicted) (Eya3_predicted), mRNA [XM_232735]	XM_232735	FALSE
A_43_P19947	0.03898	0.00137846	0.0713455	0.28437	0.169528	0.264785	0.774045	ENSRNOT00000019824	Dhx36_predicted	Rattus norvegicus similar to DEAD/H box polypeptide 36 protein (LOC310461), mRNA [XM_227203]		FALSE
A_44_P176606	0.0395081	0.0014412	0.0695295	0.821692	1.20542	0.147681	0.338052	NM_001007235	Itpr1	Rattus norvegicus inositol 1,4,5-triphosphate receptor 1 (Itpr1), mRNA [NM_001007235]	NM_001007235	FALSE
A_44_P502696	0.0414453	0.00159794	-0.685454	-0.421104	0.128987	-0.522519	-0.649609	AA875523	AA875523	AA875523 UI-R-E0-cv-e-11-0-UI.s1 UI-R-E0 Rattus norvegicus cDNA clone UI-R-E0-cv-e-11-0-UI 3' similar to gi [AA875523]	AA875523	FALSE
A_42_P495691	0.0409611	0.00154783	-0.539773	-0.269721	0.19722	0.130273	0.300019	ENSRNOT00000025618	Bcl7c_predicted	PREDICTED: Rattus norvegicus B-cell CLL [XM_215076]		FALSE
A_44_P938669	0.041389	0.0015939	-0.158536	-0.141029	-0.0404109	-0.397135	-0.528151	BC127463	Ng3	Rattus norvegicus cDNA clone MGC:156528 IMAGE:8362353, complete cds [BC127463]	BC127463	FALSE
A_42_P806899	0.0420494	0.00167448	0.16403	0.67409	1.46678	0.642953	0.715461	XM_343919	Jmjd3_predicted	PREDICTED: Rattus norvegicus jumonji domain containing 3 (predicted) (Jmjd3_predicted), mRNA [XM_343919]	XM_343919	FALSE
A_44_P484011	0.0454048	0.00204373	-0.249882	0.0229141	0.421992	0.325122	0.612918	AW142545	AW142545	AW142545 EST292797 Normalized rat embryo, Bento Soares Rattus sp. cDNA clone RGIAP10 5' end, mRNA sequence [AW142545]	AW142545	FALSE
A_44_P134143	0.0140864	0.000181883	0.021404	-0.00950575	-0.087956	0.308291	1.32064	NM_053612	Hspb8	Rattus norvegicus heat shock 22kDa protein 8 (Hspb8), mRNA [NM_053612]	NM_053612	FALSE
A_44_P450758	0.0452185	0.00200676	-0.142245	-0.388215	-0.232908	-0.0818468	0.378048	NM_022250	Qtrt1	Rattus norvegicus queuine tRNA-ribosyltransferase 1 (Qtrt1), mRNA [NM_022250]	NM_022250	FALSE
A_44_P117296	0.0441691	0.0018849	-0.551243	0.207066	0.453448	-0.101611	0.203403	XM_346074	XM_346074	Rattus norvegicus similar to FLI-LRR associated protein-1 (LOC367314), mRNA [XM_346074]	XM_346074	FALSE
A_42_P641234	0.000751521	3.55749e-07	0.342101	0.3062	1.05134	1.37798	1.83304	NM_001008303	Snrpa	Rattus norvegicus small nuclear ribonucleoprotein polypeptide A (Snrpa), mRNA [NM_001008303]	NM_001008303	FALSE
A_44_P497943	0.0426979	0.001755	-0.185935	-0.00368643	0.399821	0.203649	0.205619	BI276555	BI276555	BI276555 UI-R-CX0-bwv-f-11-0-UI.s1 UI-R-CX0 Rattus norvegicus cDNA clone UI-R-CX0-bwv-f-11-0-UI 3', mRNA sequence [BI276555]	BI276555	FALSE
A_44_P161692	0.0247356	0.000540498	-0.0837678	0.473299	1.02805	0.648962	0.99156	NM_001025699	LOC313618	Rattus norvegicus macoilin (LOC313618), mRNA [NM_001025699]	NM_001025699	FALSE
A_44_P196757	0.0258874	0.000584365	0.0596009	-0.0764107	0.0180217	0.0525784	0.679213	XM_224256	Sacs_predicted	PREDICTED: Rattus norvegicus sacsin (predicted) (Sacs_predicted), mRNA [XM_224256]	XM_224256	FALSE
A_44_P308451	0.0478307	0.0023277	-0.249559	0.102518	0.789337	0.273598	-0.0572662	AA997379	AA997379	AA997379 UI-R-C0-hn-a-06-0-UI.s1 UI-R-C0 Rattus norvegicus cDNA clone UI-R-C0-hn-a-06-0-UI 3', mRNA sequence [AA997379]	AA997379	FALSE
A_44_P245393	0.0441691	0.00188818	0.925461	0.685579	0.791515	0.432201	0.215601	NM_001001026	Olr127_predicted	Rattus norvegicus olfactory receptor 127 (predicted) (Olr127_predicted), mRNA [NM_001001026]	NM_001001026	FALSE
A_44_P449910	0.036561	0.00123631	-0.0768651	-0.711613	-0.407341	-0.306335	-0.538088	ENSRNOT00000010623	ENSRNOT00000010623	LIM domain only protein 3 (Neuronal-specific transcription factor DAT1). [Source:Uniprot/SWISSPROT;Acc:Q99MB5] [ENSRNOT00000010623]		FALSE
A_43_P12811	0.00636587	3.79366e-05	-0.397197	-0.276824	0.11641	0.507506	1.19885	NM_053464	Srm	Rattus norvegicus spermidine synthase (Srm), mRNA [NM_053464]	NM_053464	FALSE
A_44_P180041	0.0324212	0.000945559	-0.413841	-0.39034	-0.329127	0.134691	0.580325	ENSRNOT00000028125	Nme6	Nucleoside diphosphate kinase 6 (EC 2.7.4.6) (NDK 6) (NDP kinase 6) (nm23-R6) (Fragment). [Source:Uniprot/SWISSPROT;Acc:O88426] [ENSRNOT00000028125]		FALSE
A_44_P374204	0.0475439	0.00227249	-1.35412	-0.828341	-0.209761	-0.896076	-1.07342	AA996848	AA996848	AA996848 UI-R-C0-hg-g-03-0-UI.s1 UI-R-C0 Rattus norvegicus cDNA clone UI-R-C0-hg-g-03-0-UI 3', mRNA sequence [AA996848]	AA996848	FALSE
A_44_P116130	0.00464694	1.82521e-05	-0.178288	-0.152697	0.408372	0.752672	1.08486	NM_001004082	Hspcb	Rattus norvegicus heat shock 90kDa protein 1, beta (Hspcb), mRNA [NM_001004082]	NM_001004082	FALSE
A_44_P217590	0.0274131	0.000673455	-0.279739	0.15036	0.133364	0.555716	1.13047	NM_053794	Prkwnk1	Rattus norvegicus protein kinase, lysine deficient 1 (Prkwnk1), mRNA [NM_053794]	NM_053794	FALSE
A_44_P367205	0.024167	0.000517817	-0.79022	-0.62635	-0.32651	-0.485199	-0.142629	ENSRNOT00000008164	RGD1565940_predicted	PREDICTED: Rattus norvegicus similar to ADP-ribosylation factor-like 10B (predicted) (RGD1565940_predicted), mRNA [XM_573456]		FALSE
A_44_P445521	0.0491238	0.00246839	-0.174316	0.0672108	0.202156	0.257957	0.611411	ENSRNOT00000048026	Rnasen	Ribonuclease III-like protein (Fragment). [Source:Uniprot/SPTREMBL;Acc:Q67B98] [ENSRNOT00000048026]		FALSE
A_44_P114491	0.00424219	1.55132e-05	-0.392908	-0.125246	-0.10372	0.0703244	0.671438	XM_227632	RGD1559750_predicted	PREDICTED: Rattus norvegicus similar to 5-aminoimidazole-4-carboxamide ribonucleotide formyltransferase/IMP cyclohydrolase (predicted) (RGD1559750_predicted), mRNA [XM_227632]	XM_227632	FALSE
A_42_P656495	0.024167	0.000517273	-0.108714	-0.208679	-0.120403	-0.100471	-0.564131	NM_133424	Actn3	Rattus norvegicus actinin alpha 3 (Actn3), mRNA [NM_133424]	NM_133424	FALSE
A_42_P763077	0.0283206	0.000727514	0.282904	-0.0347387	0.0556417	-0.039393	-0.140818	NM_012909	Aqp2	Rattus norvegicus aquaporin 2 (Aqp2), mRNA [NM_012909]	NM_012909	FALSE
A_44_P142194	0.00574478	3.3289e-05	-1.34937	-0.947307	-0.460239	-0.338441	0.0836959	AY539899	AY539899	Rattus norvegicus LRRGT00148 mRNA, complete cds. [AY539899]	AY539899	FALSE
A_42_P540711	0.0344526	0.00105769	-0.374523	0.186507	0.015704	-1.33931	-1.78372	NM_133568	Rasd2	Rattus norvegicus RASD family, member 2 (Rasd2), mRNA [NM_133568]	NM_133568	FALSE
A_44_P607542	0.034469	0.00106244	0.121788	0.0247298	-0.0492201	0.275899	1.0443	XM_234988	Btbd11_predicted	PREDICTED: Rattus norvegicus BTB (POZ) domain containing 11 (predicted) (Btbd11_predicted), mRNA [XM_234988]	XM_234988	FALSE
A_42_P757370	0.0393203	0.00140595	-0.172052	0.236857	0.704231	0.570852	1.45951	NM_017171	Prkce	Rattus norvegicus protein kinase C, epsilon (Prkce), mRNA [NM_017171]	NM_017171	FALSE
A_44_P123732	0.00806463	5.81599e-05	-0.64546	-0.553378	-0.212006	0.0945932	0.52973	ENSRNOT00000030832	RGD1563307_predicted	PREDICTED: Rattus norvegicus similar to Set beta isoform (predicted) (RGD1563307_predicted), mRNA [XM_218493]		FALSE
A_44_P487856	0.00896768	7.48994e-05	-0.397319	-0.230568	-1.21042	-2.39327	-2.93875	NM_001012122	Ecgf1	Rattus norvegicus endothelial cell growth factor 1 (platelet-derived) (Ecgf1), mRNA [NM_001012122]	NM_001012122	FALSE
A_44_P384688	0.0229936	0.000461949	0.319687	-0.135769	0.0123912	1.27193	1.84153	A_44_P384688	A_44_P384688			FALSE
A_44_P373039	0.042535	0.00172897	0.319579	0.0979836	0.0362793	-0.0894092	-0.068677	XR_006423	LOC688561	PREDICTED: Rattus norvegicus similar to N-acetyltransferase, homolog of S. cerevisiae ARD1 (LOC688561), mRNA [XR_006423]	XR_006423	FALSE
A_43_P22719	0.0394744	0.00143641	0.895805	0.608545	0.582011	0.499228	-0.136401	ENSRNOT00000022847	Pla2g2e_predicted	PREDICTED: Rattus norvegicus phospholipase A2, group IIE (predicted) (Pla2g2e_predicted), mRNA [XM_238421]		FALSE
A_44_P137160	0.0299961	0.000822016	-1.41518	-1.08623	-0.225293	-0.85964	-1.06908	AA901137	AA901137	AA901137 UI-R-A1-dv-c-06-0-UI.s1 UI-R-A1 Rattus norvegicus cDNA clone UI-R-A1-dv-c-06-0-UI 3' similar to gi [AA901137]	AA901137	FALSE
A_44_P147806	0.0102515	9.20679e-05	0.000782251	0.0404552	0.0398824	0.335107	0.700426	ENSRNOT00000014629	ENSRNOT00000014629	similar to exosome component 10 (LOC313707), mRNA [Source:RefSeq_dna;Acc:XR_007065] [ENSRNOT00000014629]		FALSE
A_44_P538749	0.0401338	0.00148605	0.507268	0.19175	0.240642	0.207179	-0.199844	XM_222208	XM_222208	Rattus norvegicus similar to hypothetical protein FLJ21415 (LOC304520), mRNA [XM_222208]	XM_222208	FALSE
A_44_P1070649	0.00762448	5.19773e-05	0.88369	0.135419	-0.179025	0.219765	-0.0979284	ENSRNOT00000014715	ENSRNOT00000014715	Cytochrome P450 2C24 (Fragment). [Source:Uniprot/SPTREMBL;Acc:Q63854] [ENSRNOT00000014715]		FALSE
A_43_P11754	1.14351e-05	1.54877e-09	-0.296833	-0.045691	2.39492	3.14005	3.84122	NM_013215	Akr7a3	Rattus norvegicus aldo-keto reductase family 7, member A3 (aflatoxin aldehyde reductase) (Akr7a3), mRNA [NM_013215]	NM_013215	FALSE
A_44_P281076	0.0440506	0.00185947	0.246961	0.184543	0.0567054	0.428315	0.995968	NM_017048	Slc4a2	Rattus norvegicus solute carrier family 4, member 2 (Slc4a2), mRNA [NM_017048]	NM_017048	FALSE
A_44_P206258	0.00723428	4.57245e-05	-0.116069	0.103446	0.014075	0.405294	1.25045	NM_001034146	Usp10	Rattus norvegicus ubiquitin specific protease 10 (Usp10), mRNA [NM_001034146]	NM_001034146	FALSE
A_44_P562385	0.00817404	6.05211e-05	1.31498	2.26866	2.19462	0.843617	-0.0677855	TC617248	TC617248	Q46SF6_RALEJ (Q46SF6) Cytochrome-c oxidase , partial (3%) [TC617248]		FALSE
A_44_P156521	0.00841708	6.49268e-05	0.0533973	-0.272496	-0.145229	-0.316523	-0.404076	NM_001025135	LOC497995	Rattus norvegicus high sulfur protein B2F (LOC497995), mRNA [NM_001025135]	NM_001025135	FALSE
A_44_P441296	0.0452888	0.00201269	0.467818	0.640541	0.971249	1.17305	1.38806	ENSRNOT00000041930	ENSRNOT00000041930	similar to Glyceraldehyde-3-phosphate dehydrogenase (GAPDH) (38 kDa BFA-dependent ADP-ribosylation substrate) (BARS-38) (LOC366729), mRNA [Source:RefSeq_dna;Acc:XR_008740] [ENSRNOT00000041930]		FALSE
A_44_P511333	0.026641	0.00062423	-0.360363	-0.0942401	0.131027	0.208617	0.458982	XR_007282	RGD1560227_predicted	PREDICTED: Rattus norvegicus similar to RIKEN cDNA 1700025B16 (predicted) (RGD1560227_predicted), mRNA [XR_007282]	XR_007282	FALSE
A_44_P1012556	0.0256796	0.000575993	-0.745	-0.430254	0.0147394	-0.220092	0.349269	NM_001013988	RGD1311800	Rattus norvegicus similar to genethonin 1 (RGD1311800), mRNA [NM_001013988]	NM_001013988	FALSE
A_44_P440450	0.0263407	0.00060686	-0.193902	0.0597076	0.160355	0.474936	0.94231	NM_017118	Capns1	Rattus norvegicus calpain, small subunit 1 (Capns1), mRNA [NM_017118]	NM_017118	FALSE
A_44_P747024	0.00502515	2.18725e-05	0.19708	0.280963	0.960984	1.13447	1.88434	TC597353	TC597353	Q6BCZ4_MOUSE (Q6BCZ4) Fetal liver expressing gene 1, partial (3%) [TC597353]		FALSE
A_44_P315661	0.0035358	1.1653e-05	0.182715	0.883422	1.44688	1.15464	2.1758	NM_013134	Hmgcr	Rattus norvegicus 3-hydroxy-3-methylglutaryl-Coenzyme A reductase (Hmgcr), mRNA [NM_013134]	NM_013134	FALSE
A_44_P260358	0.0390929	0.00139075	-0.183748	0.02996	0.0795628	0.0271758	0.492411	ENSRNOT00000019500	Slc27a4	Slc27a4 protein (Fragment). [Source:Uniprot/SPTREMBL;Acc:Q5BJL7] [ENSRNOT00000019500]		FALSE
A_44_P429455	0.0107282	0.000103165	0.312021	0.544684	0.419643	-0.29172	-0.67545	ENSRNOT00000008981	Lama5	Laminin chain (Fragment). [Source:Uniprot/SPTREMBL;Acc:P70636] [ENSRNOT00000008981]		FALSE
A_44_P682891	0.0413288	0.0015811	0.0106767	0.0320064	-0.169063	-0.371168	-0.280705	NM_001007617	Nuak2	Rattus norvegicus NUAK family, SNF1-like kinase, 2 (Nuak2), mRNA [NM_001007617]	NM_001007617	FALSE
A_44_P177807	0.0279287	0.000705149	-0.258826	0.289714	0.659783	0.135397	0.382756	NM_023090	Epas1	Rattus norvegicus endothelial PAS domain protein 1 (Epas1), mRNA [NM_023090]	NM_023090	FALSE
A_42_P594699	0.00362672	1.23487e-05	-0.031406	0.000174046	0.245279	0.490756	1.40496	NM_133394	Zdhhc7	Rattus norvegicus zinc finger, DHHC domain containing 7 (Zdhhc7), mRNA [NM_133394]	NM_133394	FALSE
A_44_P504298	0.0318421	0.000902791	0.244298	-0.0484047	-0.501689	0.145176	0.000485063	ENSRNOT00000048264	Cdc42ep4_predicted	PREDICTED: Rattus norvegicus CDC42 effector protein (Rho GTPase binding) 4 (predicted) (Cdc42ep4_predicted), mRNA [XM_221077]		FALSE
A_44_P667768	0.0317463	0.000895776	-0.783304	-0.872976	-0.520018	0.107553	0.714887	A_44_P667768	A_44_P667768			FALSE
A_44_P621119	0.011615	0.000116657	0.521031	0.022159	-0.331172	-0.218899	-0.351089	ENSRNOT00000061592	ENSRNOT00000061592	PREDICTED: Rattus norvegicus hypothetical protein LOC685485 (LOC685485), mRNA [XM_001063981]		FALSE
A_44_P159400	0.0035358	1.16044e-05	0.0489452	0.213302	1.09078	1.22191	1.60659	XM_234370	XM_234370	Rattus norvegicus similar to Ab2-162 (LOC299244), mRNA [XM_234370]	XM_234370	FALSE
A_44_P328829	0.0364991	0.00122664	-0.00476325	0.191492	0.7429	0.589633	0.656949	XM_220639	Nek8_predicted	Rattus norvegicus similar to NIMA-related kinase 8 (LOC287473), mRNA [XM_220639]	XM_220639	FALSE
A_43_P14163	0.0212391	0.000390261	-0.532658	-0.242289	0.278958	0.740622	0.73066	NM_012615	Odc1	Rattus norvegicus ornithine decarboxylase 1 (Odc1), mRNA [NM_012615]	NM_012615	FALSE
A_44_P285247	0.0269913	0.000650698	-0.40082	-0.100874	0.173412	0.295448	0.484552	ENSRNOT00000015232	RGD1559986_predicted	AW144296 EST294592 Normalized rat ovary, Bento Soares Rattus sp. cDNA clone RGICP54 5' end, mRNA sequence [AW144296]		FALSE
A_44_P394011	0.04435	0.00190815	-0.00928605	-0.0540991	-0.215131	0.395924	1.25341	NM_198783	Hrpap20	Rattus norvegicus hormone-regulated proliferation associated protein 20 (Hrpap20), mRNA [NM_198783]	NM_198783	FALSE
A_44_P1048043	0.043473	0.00180401	-0.635832	0.261615	0.974732	0.262916	0.496876	ENSRNOT00000056592	Pabpc4	Pabpc4 protein (Fragment). [Source:Uniprot/SPTREMBL;Acc:Q5I0G7] [ENSRNOT00000056592]		FALSE
A_44_P505851	0.011615	0.000114749	-0.962565	-0.605268	-0.339996	0.0598251	0.425225	NM_001012504	Set_predicted	Rattus norvegicus SET translocation (predicted) (Set_predicted), mRNA [NM_001012504]	NM_001012504	FALSE
A_44_P388072	0.0104255	9.83716e-05	-0.456544	-0.413069	-0.343763	-0.146854	0.677624	ENSRNOT00000015483	RGD1311909_predicted	PREDICTED: Rattus norvegicus hypothetical LOC312654 (predicted) (RGD1311909_predicted), mRNA [XM_001054467]		FALSE
A_43_P11306	0.0278204	0.000695369	-0.1552	-0.132407	0.360893	0.682561	0.992283	NM_001010945	RGD1311474	Rattus norvegicus similar to transmembrane protein induced by tumor necrosis factor alpha (RGD1311474), mRNA [NM_001010945]	NM_001010945	FALSE
A_44_P703840	0.0475426	0.00226287	0.0672507	0.156384	0.786568	-0.292861	-0.33712	A_44_P703840	A_44_P703840			FALSE
A_43_P18208	0.0447338	0.00195294	-0.4194	-0.335475	-0.499034	-0.0411172	0.464499	ENSRNOT00000022356	Pitrm1_predicted	PREDICTED: Rattus norvegicus pitrilysin metallepetidase 1 (predicted) (Pitrm1_predicted), mRNA [XM_225517]		FALSE
A_44_P536749	0.0198548	0.000345105	-0.319653	-0.221459	0.0425547	0.751678	1.23113	ENSRNOT00000002081	Metapl1_predicted	PREDICTED: Rattus norvegicus methionine aminopeptidase-like 1 (predicted) (Metapl1_predicted), mRNA [XM_230988]		FALSE
A_44_P730150	0.0199664	0.000348848	-0.301188	-0.342655	0.120387	0.202387	0.228661	TC605210	TC605210	Q3J975_NITOC (Q3J975) Flagellar biosynthesis protein FliQ precursor, partial (15%) [TC605210]		FALSE
A_44_P430345	0.00508297	2.27185e-05	-0.532961	-0.417901	-0.23508	-0.0182518	1.03579	NM_001030041	Prmt4	Rattus norvegicus protein arginine N-methyltransferase 4 (Prmt4), transcript variant 1, mRNA [NM_001030041]	NM_001030041	FALSE
A_44_P253940	0.0253155	0.000561678	-0.181298	-0.304627	-0.359279	0.357346	1.6813	NM_198783	Hrpap20	Rattus norvegicus hormone-regulated proliferation associated protein 20 (Hrpap20), mRNA [NM_198783]	NM_198783	FALSE
A_44_P981679	0.0475426	0.00226491	-0.391492	-0.255472	-0.139015	0.360462	1.00997	XM_235547	RGD1560783_predicted	PREDICTED: Rattus norvegicus similar to RIKEN cDNA 3110048E14, isoform a (predicted) (RGD1560783_predicted), mRNA [XM_235547]	XM_235547	FALSE
A_44_P262467	0.0342225	0.00104753	0.478446	0.829138	0.522759	0.948168	0.196088	ENSRNOT00000035962	RGD1310945_predicted	PREDICTED: Rattus norvegicus similar to hypothetical protein FLJ23305 (predicted) (RGD1310945_predicted), mRNA [XM_214760]		FALSE
A_44_P430033	0.0375305	0.00128863	-0.218959	-0.134778	0.103233	-0.337624	-0.653778	AI231180	AI231180	AI231180 EST227868 Normalized rat embryo, Bento Soares Rattus sp. cDNA clone REMDG81 3' end, mRNA sequence [AI231180]	AI231180	FALSE
A_43_P20775	0.0478307	0.00231836	0.228867	0.0568746	0.0612605	0.129239	0.5544	NM_001024773	Brf2	Rattus norvegicus BRF2, subunit of RNA polymerase III transcription initiation factor, BRF1-like (Brf2), mRNA [NM_001024773]	NM_001024773	FALSE
A_44_P324841	0.0282544	0.00071895	-0.825025	-0.400162	-0.0119677	-0.6901	-0.863356	BI285568	BI285568	BI285568 UI-R-CW0s-ccb-f-08-0-UI.s1 UI-R-CW0s Rattus norvegicus cDNA clone UI-R-CW0s-ccb-f-08-0-UI 3', mRNA sequence [BI285568]	BI285568	FALSE
A_43_P17622	0.0483855	0.00240289	0.0246546	-0.141893	-0.599695	-0.386484	0.316567	ENSRNOT00000042981	Lass5_predicted	Rattus norvegicus similar to TRH4 (LOC366984), mRNA [XM_345870]		FALSE
A_44_P914285	0.0165497	0.000252818	-0.562067	-0.380454	0.0821433	0.441619	0.764267	XM_001062172	LOC681996	PREDICTED: Rattus norvegicus similar to AHA1, activator of heat shock 90kDa protein ATPase homolog 1, transcript variant 2 (LOC681996), mRNA [XM_001062172]	XM_001062172	FALSE
A_44_P916510	0.0301373	0.000829209	-0.417577	-0.403305	-0.432711	-0.238004	0.542742	ENSRNOT00000007849	Kctd5_predicted	PREDICTED: Rattus norvegicus potassium channel tetramerisation domain containing 5 (predicted) (Kctd5_predicted), mRNA [XM_220224]		FALSE
A_42_P784063	0.0478307	0.00234141	-0.00186718	4.29153e-05	-0.0255977	0.804697	1.13766	NM_199370	Krt2-8	Rattus norvegicus keratin complex 2, basic, gene 8 (Krt2-8), mRNA [NM_199370]	NM_199370	FALSE
A_44_P687109	0.0358995	0.00116881	0.237355	0.280106	0.116653	-0.100937	-0.472909	TC618316	TC618316	Q8PW98_METMA (Q8PW98) Conserved protein, partial (23%) [TC618316]		FALSE
A_44_P366142	0.00723853	4.67318e-05	-0.434453	0.134724	1.94902	0.255584	-0.499415	NM_001013181	Zbtb16	Rattus norvegicus zinc finger and BTB domain containing 16 (Zbtb16), mRNA [NM_001013181]	NM_001013181	FALSE
A_43_P12344	0.0393203	0.00140557	-0.621844	-0.480799	-0.336174	0.443136	1.69378	NM_022941	Nr1i3	Rattus norvegicus nuclear receptor subfamily 1, group I, member 3 (Nr1i3), mRNA [NM_022941]	NM_022941	FALSE
A_44_P299870	0.00256413	6.1354e-06	0.120771	0.0457678	0.70979	1.44398	1.93487	NM_175761	Hspca	Rattus norvegicus heat shock protein 1, alpha (Hspca), mRNA [NM_175761]	NM_175761	FALSE
A_44_P277794	0.0118963	0.000123325	-0.941178	-0.486054	0.282602	-0.390537	-0.986198	AI599828	AI599828	AI599828 EST251531 Normalized rat embryo, Bento Soares Rattus sp. cDNA clone REMEM30 3' end, mRNA sequence [AI599828]	AI599828	FALSE
A_44_P435513	0.0285874	0.000747272	-0.249076	0.191753	0.688521	0.523237	0.483016	BE115992	BE115992	UI-R-BS1-axy-c-05-0-UI.s1 UI-R-BS1 Rattus norvegicus cDNA clone UI-R-BS1-axy-c-05-0-UI 3', mRNA sequence [BE115992]	BE115992	FALSE
A_44_P186493	0.0393392	0.00142465	-0.0888964	-0.0942199	0.0100976	0.174251	0.869675	ENSRNOT00000026514	ENSRNOT00000026514	Rattus norvegicus similar to KIAA1089 protein (LOC310627), mRNA [XM_227399]		FALSE
A_44_P850592	0.0457635	0.0020826	0.357122	0.0296619	0.235934	0.408699	0.699615	CB312819	CB312819	AGENCOURT_11468960 NICHD_Rr_Pit1 Rattus norvegicus cDNA clone IMAGE:6890057 5', mRNA sequence [CB312819]	CB312819	FALSE
A_42_P673011	0.024167	0.000514457	-0.877115	0.285092	0.998207	0.345182	0.136989	ENSRNOT00000042973	LOC299339	PREDICTED: Rattus norvegicus similar to Tumor necrosis factor, alpha-induced protein 2 (Primary response gene B94 protein) (LOC299339), mRNA [XM_216791]		FALSE
A_42_P538374	0.0345848	0.00107111	0.244657	0.306873	0.0921529	0.653624	1.32243	NM_001014029	RGD1310316	Rattus norvegicus similar to RIKEN cDNA 2900009I07 (RGD1310316), mRNA [NM_001014029]	NM_001014029	FALSE
A_43_P19155	0.0284967	0.000743616	-0.710058	-0.346495	-0.122342	0.0659625	0.438557	ENSRNOT00000010211	RGD1565362_predicted	INADL (Fragment). [Source:Uniprot/SPTREMBL;Acc:Q8VI28] [ENSRNOT00000010211]		FALSE
A_44_P142428	0.029095	0.000778931	-0.546527	-0.236866	-0.0566314	0.0766283	0.615217	ENSRNOT00000022633	ENSRNOT00000022633	PREDICTED: Rattus norvegicus similar to solute carrier family 25, member 28 (LOC688811), mRNA [XM_001068401]		FALSE
A_44_P202434	0.0491605	0.00247298	-1.12589	-0.563358	0.00239801	-0.110563	-0.0740606	AA819129	AA819129	AA819129 UI-R-A0-ba-b-08-0-UI.s1 UI-R-A0 Rattus norvegicus cDNA clone UI-R-A0-ba-b-08-0-UI 3' similar to emb [AA819129]	AA819129	FALSE
A_43_P23342	0.00857898	6.79314e-05	0.951208	-0.0744506	-0.137426	-0.104618	-0.209002	NM_212536	Msh5	Rattus norvegicus mutS homolog 5 (E. coli) (Msh5), mRNA [NM_212536]	NM_212536	FALSE
A_44_P335514	0.0364991	0.00122075	-0.0975358	0.0447676	0.106948	0.306179	0.466314	NM_001012097	Atg7	Rattus norvegicus autophagy-related 7 (yeast) (Atg7), mRNA [NM_001012097]	NM_001012097	FALSE
A_44_P386579	0.00203963	3.34777e-06	-0.203199	-0.0522846	-0.0457612	0.298975	1.52417	NM_173306	Lama3	Rattus norvegicus laminin, alpha 3 (Lama3), mRNA [NM_173306]	NM_173306	FALSE
A_44_P832655	0.0142914	0.000187821	0.0328192	-0.029999	0.149316	0.141193	0.608356	XM_001077155	LOC687118	PREDICTED: Rattus norvegicus similar to death effector domain-containing DNA binding protein 2 (LOC687118), mRNA [XM_001077155]	XM_001077155	FALSE
A_44_P775932	0.014606	0.000196845	-0.0205022	-0.307789	-0.216712	0.801823	1.25586	ENSRNOT00000036737	ENSRNOT00000036737			FALSE
A_44_P1023611	0.011615	0.000117986	0.100521	-0.213704	0.478535	0.474717	0.824583	NM_001048233	RGD1562258_predicted	Rattus norvegicus similar to PAP-1 binding protein (predicted) (RGD1562258_predicted), mRNA [NM_001048233]	NM_001048233	FALSE
A_44_P198349	0.0261872	0.000601027	0.184794	0.344707	0.0729145	0.679258	1.42753	NM_024398	Aco2	Rattus norvegicus aconitase 2, mitochondrial (Aco2), mRNA [NM_024398]	NM_024398	FALSE
A_43_P11687	0.029016	0.000768957	-0.316973	-0.263596	0.0311683	0.490501	0.663688	NM_013063	Parp1	Rattus norvegicus poly (ADP-ribose) polymerase family, member 1 (Parp1), mRNA [NM_013063]	NM_013063	FALSE
A_44_P743168	0.011615	0.000117581	-0.608049	-0.402151	0.0762599	0.342157	0.713003	AI412180	AI412180	AI412180 EST240474 Normalized rat kidney, Bento Soares Rattus sp. cDNA clone RKIEP46 3' end, mRNA sequence [AI412180]	AI412180	FALSE
A_44_P618177	0.047146	0.0022264	-0.454425	-0.239825	-0.191715	-0.265374	0.557235	CF110664	CF110664	Shultzomica03915 Rat lung airway and parenchyma cDNA libraries Rattus norvegicus cDNA clone Contig3470 5', mRNA sequence [CF110664]	CF110664	FALSE
A_44_P494242	0.0223306	0.000433507	-0.294269	-0.216822	0.585752	0.923225	0.906946	NM_130416	Anxa7	Rattus norvegicus annexin A7 (Anxa7), mRNA [NM_130416]	NM_130416	FALSE
A_44_P699780	0.0452888	0.0020226	0.0050205	0.648552	1.37362	0.448372	0.533311	DN934467	DN934467	AGENCOURT_50136625 NCI_CGAP_Pr50 Rattus norvegicus cDNA clone IMAGE:7936590 5', mRNA sequence [DN934467]	DN934467	FALSE
A_44_P505885	0.0199664	0.000348092	-0.346678	-0.0246131	0.173963	0.428504	0.764121	NM_031353	Vdac1	Rattus norvegicus voltage-dependent anion channel 1 (Vdac1), mRNA [NM_031353]	NM_031353	FALSE
A_44_P654434	0.0221117	0.000417277	0.42206	0.91399	1.30631	0.0244211	-0.0508571	DV726161	DV726161	RVL18428 Wackym-Soares normalized rat vestibular cDNA library Rattus norvegicus cDNA 5', mRNA sequence [DV726161]	DV726161	FALSE
A_43_P18676	0.00814742	5.93948e-05	2.44438	0.0100957	0.267794	0.161474	-0.0988673	ENSRNOT00000025773	ENSRNOT00000025773	Protein orai-3 (Transmembrane protein 142C). [Source:Uniprot/SWISSPROT;Acc:Q6AXR8] [ENSRNOT00000025773]		FALSE
A_44_P1041179	0.0395627	0.00144545	-0.900615	0.0150373	0.452432	-0.231051	-0.0855439	ENSRNOT00000056736	Ep400	PREDICTED: Rattus norvegicus E1A binding protein p400 (Ep400), mRNA [XM_222251]		FALSE
A_44_P452133	0.0269159	0.000639113	-0.0905433	-0.120919	-0.495366	-0.0899694	0.579694	NM_031819	Fath	Rattus norvegicus fat tumor suppressor homolog (Drosophila) (Fath), mRNA [NM_031819]	NM_031819	FALSE
A_44_P118342	0.0283359	0.000734119	-1.61882	-1.12644	-0.471797	-1.19698	-1.08649	AA819521	Rps5	AA819521 UI-R-A0-bf-e-02-0-UI.s1 UI-R-A0 Rattus norvegicus cDNA clone UI-R-A0-bf-e-02-0-UI 3' similar to emb [AA819521]	AA819521	FALSE
A_44_P684899	0.0401338	0.00148803	-0.236518	0.173501	0.87192	0.0690927	0.0940874	BE104772	BE104772	UI-R-BX0-art-d-04-0-UI.s1 UI-R-BX0 Rattus norvegicus cDNA clone UI-R-BX0-art-d-04-0-UI 3', mRNA sequence [BE104772]	BE104772	FALSE
A_43_P21033	0.0298193	0.00081313	0.208988	-0.00713515	-0.0342822	0.244055	0.522734	ENSRNOT00000020909	Smyd5_predicted	Rattus norvegicus similar to NN8-4AG (LOC312503), mRNA [XM_232134]		FALSE
A_43_P11125	0.049098	0.00246412	0.557673	0.504182	0.862137	0.641702	0.30693	CB544867	CB544867	CB544867 AMGNNUC:URRG1-00062-G4-A1 urrg1 (14046) Rattus norvegicus cDNA clone urrg1-00062-g4, mRNA sequence [CB544867]	CB544867	FALSE
A_43_P11776	0.000751521	2.44696e-07	-0.411542	0.0917454	1.15742	1.43754	1.99337	NM_017014	Gstm1	Rattus norvegicus glutathione S-transferase, mu 1 (Gstm1), mRNA [NM_017014]	NM_017014	FALSE
A_42_P842946	0.0118963	0.000128748	-0.319929	-0.155751	0.36846	0.190566	1.1581	NM_001025732	Nol5a	Rattus norvegicus nucleolar protein 5A (Nol5a), mRNA [NM_001025732]	NM_001025732	FALSE
A_44_P276951	0.00531731	2.4246e-05	0.04888	0.0618033	0.424715	0.432161	1.32904	XM_232771	RGD1564762_predicted	PREDICTED: Rattus norvegicus similar to erythrocyte membrane protein band 4.1 (elliptocytosis 1, RH-linked) isoform 1 (predicted) (RGD1564762_predicted), mRNA [XM_232771]	XM_232771	FALSE
A_44_P1020920	0.0268046	0.000630559	0.374743	-0.150545	0.0637592	-0.091879	-0.194032	ENSRNOT00000047120	RGD1306714	RGD1306714 protein (Fragment). [Source:Uniprot/SPTREMBL;Acc:Q5M9F2] [ENSRNOT00000047120]		FALSE
A_44_P297119	0.042535	0.00173597	-0.0686461	0.151985	0.299626	0.647017	1.09719	NM_057140	Ppp2r1a	Rattus norvegicus protein phosphatase 2 (formerly 2A), regulatory subunit A (PR 65), alpha isoform (Ppp2r1a), mRNA [NM_057140]	NM_057140	FALSE
A_44_P928419	0.00271837	6.62718e-06	-0.322049	-0.28749	-0.536625	0.204873	1.35882	ENSRNOT00000060958	ENSRNOT00000060958	Mdn1 protein (Fragment). [Source:Uniprot/SPTREMBL;Acc:Q5RJZ0] [ENSRNOT00000060958]		FALSE
A_44_P852185	0.0441691	0.00187963	0.294235	0.115077	-0.251384	0.101256	0.897359	A_44_P852185	A_44_P852185			FALSE
A_44_P124074	0.0454445	0.00205167	0.811932	0.0820081	0.0219755	0.622428	0.890836	XR_006012	LOC300277	PREDICTED: Rattus norvegicus similar to Glyceraldehyde-3-phosphate dehydrogenase (GAPDH) (LOC300277), mRNA [XR_006012]	XR_006012	FALSE
A_44_P483865	0.0318442	0.000916086	-0.746285	-0.522044	0.00348771	-0.771791	-0.70103	CV111211	CV111211	AGENCOURT_31539679 NIH_MGC_270 Rattus norvegicus cDNA clone IMAGE:7444812 5', mRNA sequence [CV111211]	CV111211	FALSE
A_44_P220032	0.00759224	5.07503e-05	0.287319	0.48053	0.440628	0.659508	1.26899	NM_001006996	Ddx18	Rattus norvegicus DEAD (Asp-Glu-Ala-Asp) box polypeptide 18 (Ddx18), mRNA [NM_001006996]	NM_001006996	FALSE
A_44_P288156	0.014606	0.000198915	0.0226566	-0.155389	0.103994	0.65354	1.07838	NM_019170	Cbr1	Rattus norvegicus carbonyl reductase 1 (Cbr1), mRNA [NM_019170]	NM_019170	FALSE
A_44_P483313	0.00502515	2.20063e-05	-0.0595436	-0.116171	0.325328	0.747433	0.967706	NM_001009369	Mrpl38	Rattus norvegicus mitochondrial ribosomal protein L38 (Mrpl38), mRNA [NM_001009369]	NM_001009369	FALSE
A_44_P659530	0.0275243	0.00068469	-0.22883	-0.0874867	0.663736	0.440089	0.993196	BM986371	BM986371	EST531151 Rat gene index, normalized rat, norvegicus Rattus norvegicus cDNA clone RGIAA19 5' end, mRNA sequence [BM986371]	BM986371	FALSE
A_42_P726994	0.0367263	0.00124356	-0.217886	-0.121377	0.423348	0.274451	0.69104	XM_001072149	LOC689820	PREDICTED: Rattus norvegicus similar to SET domain-containing protein (LOC689820), mRNA [XM_001072149]	XM_001072149	FALSE
A_44_P542703	0.0208757	0.000376301	-0.330433	-0.201885	-0.241226	0.0260367	0.944168	AW144011	AW144011	AW144011 EST294307 Normalized rat embryo, Bento Soares Rattus sp. cDNA clone RGICF30 5' end, mRNA sequence [AW144011]	AW144011	FALSE
A_42_P828934	0.0137468	0.000173183	0.332042	0.251061	0.0241917	0.503353	1.28664	NM_001011951	Sf3b4	Rattus norvegicus splicing factor 3b, subunit 4 (Sf3b4), mRNA [NM_001011951]	NM_001011951	FALSE
A_44_P492808	0.0057074	3.13632e-05	-0.0813323	-0.229328	-0.0791656	0.172327	0.429328	XM_578248	RGD1562046_predicted	PREDICTED: Rattus norvegicus similar to putative lipid kinase (predicted) (RGD1562046_predicted), mRNA [XM_578248]	XM_578248	FALSE
A_44_P377722	0.0176685	0.000283972	-0.331687	0.067564	0.283627	0.571058	1.07319	NM_001007651	Peflin	Rattus norvegicus PEF protein with a long N-terminal hydrophobic domain (Peflin), mRNA [NM_001007651]	NM_001007651	FALSE
A_44_P378675	0.0342225	0.0010472	-0.892966	-0.327527	-0.0153464	-0.445042	-0.885456	AI179100	AI179100	AI179100 EST222784 Normalized rat spleen, Bento Soares Rattus sp. cDNA clone RSPCB76 3' end, mRNA sequence [AI179100]	AI179100	FALSE
A_42_P774527	0.034469	0.00106373	-0.373172	-0.193601	-0.349724	-1.06153	-1.41632	NM_134332	Gzmc	Rattus norvegicus granzyme C (Gzmc), mRNA [NM_134332]	NM_134332	FALSE
A_43_P13119	0.0283359	0.000732642	0.801259	0.136336	0.314687	0.142962	-0.0279038	NM_130425	Runx3	Rattus norvegicus runt-related transcription factor 3 (Runx3), mRNA [NM_130425]	NM_130425	FALSE
A_44_P151295	0.03933	0.00141517	-1.19903	-0.556181	0.464029	-0.416228	-0.93486	AA925555	AA925555	AA925555 UI-R-A1-em-h-11-0-UI.s1 UI-R-A1 Rattus norvegicus cDNA clone UI-R-A1-em-h-11-0-UI 3' similar to gi [AA925555]	AA925555	FALSE
A_44_P1030714	0.0469043	0.00219738	-0.153436	-0.423812	0.0640799	-0.203624	2.46786	NM_001083898	Ccdc92	Rattus norvegicus coiled-coil domain containing 92 (Ccdc92), mRNA [NM_001083898]	NM_001083898	FALSE
A_44_P745269	0.0102515	9.39532e-05	-0.580303	-0.138109	0.477007	-0.352039	-0.583738	NM_017135	Ak3l1	Rattus norvegicus adenylate kinase 3-like 1 (Ak3l1), mRNA [NM_017135]	NM_017135	FALSE
A_44_P173039	0.0142347	0.000186368	0.0726494	-0.217743	-0.205487	0.00564992	0.444977	ENSRNOT00000001970	Nsun5_predicted	NOL1/NOP2/Sun domain family member 5 (Fragment). [Source:Uniprot/SPTREMBL;Acc:Q2VET8] [ENSRNOT00000001970]		FALSE
A_43_P17703	0.0491605	0.00247689	-0.630452	-0.633185	-0.64919	-0.219956	0.631036	NM_001017449	Dph5	Rattus norvegicus DPH5 homolog (S. cerevisiae) (Dph5), mRNA [NM_001017449]	NM_001017449	FALSE
A_44_P995959	0.0452185	0.00200221	0.0361205	0.101695	0.163948	0.264423	1.00443	NM_001011895	Htf9c	Rattus norvegicus HpaII tiny fragments locus 9c (Htf9c), mRNA [NM_001011895]	NM_001011895	FALSE
A_44_P222487	0.0124286	0.000144205	0.320232	0.0541015	0.182788	0.830114	1.04964	ENSRNOT00000023286	Mrps27_predicted	PREDICTED: Rattus norvegicus mitochondrial ribosomal protein S27 (predicted) (Mrps27_predicted), mRNA [XM_342180]		FALSE
A_43_P18637	0.0256796	0.000575024	0.64883	0.0363684	0.345758	0.0709491	-0.178268	XM_216838	XM_216838	Rattus norvegicus similar to THEG protein (LOC299599), mRNA [XM_216838]	XM_216838	FALSE
A_44_P366177	0.00648212	3.8922e-05	0.123846	0.010128	-0.126773	0.215438	0.76526	DN933141	LOC681352	AGENCOURT_50156074 NCI_CGAP_Pr49 Rattus norvegicus cDNA clone IMAGE:7933774 5', mRNA sequence [DN933141]	DN933141	FALSE
A_44_P157563	0.0303537	0.000838666	-0.050826	0.581792	1.10048	1.21594	1.35851	AA963043	AA963043	AA963043 UI-R-E1-fv-c-11-0-UI.s2 UI-R-E1 Rattus norvegicus cDNA clone UI-R-E1-fv-c-11-0-UI 3', mRNA sequence [AA963043]	AA963043	FALSE
A_44_P455080	0.0451054	0.00197527	-0.790133	-0.6491	-0.514945	-0.40947	0.318307	ENSRNOT00000007549	Pwp1_predicted	similar to periodic tryptophan protein 1 homolog (LOC365418), mRNA [Source:RefSeq_dna;Acc:XR_009168] [ENSRNOT00000007549]		FALSE
A_43_P19751	0.00362672	1.24438e-05	-0.585509	-0.245274	0.0861808	0.345741	1.18718	XM_238038	RGD1565975_predicted	PREDICTED: Rattus norvegicus RGD1565975 (predicted) (RGD1565975_predicted), mRNA [XM_238038]	XM_238038	FALSE
A_44_P331142	0.0129925	0.000155737	-0.28713	-0.175031	-0.29299	0.096796	1.35231	BC086519	BC086519	Rattus norvegicus cDNA clone IMAGE:7302535, with apparent retained intron [BC086519]	BC086519	FALSE
A_44_P690364	0.0459955	0.00209731	0.556062	0.91471	0.481219	0.355062	2.3948	AW527866	AW527866	AW527866 UI-R-BT1-akb-a-11-0-UI.s1 UI-R-BT1 Rattus norvegicus cDNA clone UI-R-BT1-akb-a-11-0-UI 3', mRNA sequence [AW527866]	AW527866	FALSE
A_44_P515170	0.0264379	0.000615889	-0.669158	-0.445067	-0.301737	0.141186	0.580785	NM_181480	Nadsyn1	Rattus norvegicus NAD synthetase 1 (Nadsyn1), mRNA [NM_181480]	NM_181480	FALSE
A_44_P445195	0.0196025	0.000339836	-0.199924	-0.191744	-0.0177993	0.441981	0.975448	NM_133300	Bat1a	Rattus norvegicus HLA-B-associated transcript 1A (Bat1a), mRNA [NM_133300]	NM_133300	FALSE
A_44_P527739	0.0368237	0.0012535	-0.0513889	-0.140008	-0.272835	-0.031657	0.27675	NM_001014064	Pars2	Rattus norvegicus prolyl-tRNA synthetase (mitochondrial)(putative) (Pars2), mRNA [NM_001014064]	NM_001014064	FALSE
A_44_P344344	0.0212391	0.000389034	0.555001	1.27348	1.16852	0.277314	-0.250176	S79716	S79716	VI ADH=class VI alcohol dehydrogenase [rats, liver, mRNA Partial, 173 nt] [S79716]	S79716	FALSE
A_44_P412098	0.000751521	2.53167e-07	-0.0587817	-0.016072	0.367437	0.75876	1.16543	NM_172075	Thop1	Rattus norvegicus thimet oligopeptidase 1 (Thop1), mRNA [NM_172075]	NM_172075	FALSE
A_44_P677758	0.0178821	0.000288515	-0.591666	-0.410841	-0.583988	-0.224055	0.523597	CB720810	CB720810	AMGNNUC:NRHY7-00006-D5-A nrhy7 (10850) Rattus norvegicus cDNA clone nrhy7-00006-d5 5', mRNA sequence [CB720810]	CB720810	FALSE
A_44_P257467	0.00317432	8.16868e-06	-0.0421904	-0.136692	0.13121	0.362651	0.915974	NM_001013967	RGD1311260	Rattus norvegicus hypothetical LOC303211 (RGD1311260), mRNA [NM_001013967]	NM_001013967	FALSE
A_42_P719101	0.0469968	0.00220662	0.788727	-0.0205784	-0.106808	0.0902775	-0.0400436	NM_001024865	Mrpl40	Rattus norvegicus mitochondrial ribosomal protein L40 (Mrpl40), mRNA [NM_001024865]	NM_001024865	FALSE
A_44_P420980	0.0247259	0.000539171	1.04624	0.08748	-0.0118428	0.136519	0.011295	AI072953	AI072953	AI072953 UI-R-Y0-ly-b-07-0-UI.s1 UI-R-Y0 Rattus norvegicus cDNA clone UI-R-Y0-ly-b-07-0-UI 3', mRNA sequence [AI072953]	AI072953	FALSE
A_44_P853184	0.044714	0.00194538	0.469823	0.835336	1.42805	0.845144	0.398025	TC639599	TC639599			FALSE
A_44_P700187	0.043473	0.00180565	-0.497137	-0.63208	-0.383209	-0.240485	0.424558	TC603712	TC603712			FALSE
A_44_P1055052	0.00203963	3.09919e-06	-0.59272	-0.410066	-0.0938056	0.0846912	0.953173	ENSRNOT00000024938	ENSRNOT00000024938	similar to nucleolar protein 1 (LOC367748), mRNA [Source:RefSeq_dna;Acc:XR_005684] [ENSRNOT00000024938]		FALSE
A_44_P742499	0.0405429	0.00152471	-0.330151	-0.268618	0.0854458	0.0639268	0.760646	AW913988	AW913988	AW913988 EST294766 Rat gene index, normalized rat, norvegicus, Bento Soares Rattus norvegicus cDNA clone RGIZA16 5' end, mRNA sequence [AW913988]	AW913988	FALSE
A_44_P554066	0.0421121	0.00168258	-0.95954	-0.624707	-0.527629	-0.956811	-0.933743	AI235452	AI235452	AI235452 EST232014 Normalized rat ovary, Bento Soares Rattus sp. cDNA clone ROVCR95 3' end, mRNA sequence [AI235452]	AI235452	FALSE
A_43_P18742	0.0356172	0.00114283	-0.141805	-0.295034	-0.64075	0.300608	0.961336	ENSRNOT00000000717	Bxdc1_predicted	PREDICTED: Rattus norvegicus brix domain containing 1 (predicted) (Bxdc1_predicted), mRNA [XM_215404]		FALSE
A_44_P102061	0.0129925	0.000157922	-0.50516	-0.2202	0.00230432	-0.12963	0.317892	XM_243630	Zc3h7b_predicted	PREDICTED: Rattus norvegicus zinc finger CCCH-type containing 7B (predicted) (Zc3h7b_predicted), mRNA [XM_243630]	XM_243630	FALSE
A_43_P13419	0.0231485	0.000472376	-0.720885	-0.958848	-0.523477	-0.16145	0.245745	NM_172045	Ppp1r14b	Rattus norvegicus protein phosphatase 1, regulatory (inhibitor) subunit 14B (Ppp1r14b), mRNA [NM_172045]	NM_172045	FALSE
A_44_P205941	0.00806463	5.82547e-05	-0.0882263	0.0540953	-0.143186	0.302762	0.851383	ENSRNOT00000002032	Wbscr16_predicted	PREDICTED: Rattus norvegicus Williams-Beuren syndrome chromosome region 16 homolog (human) (predicted) (Wbscr16_predicted), mRNA [XM_341066]		FALSE
A_42_P704824	0.029095	0.000778823	-0.253812	-0.56119	-0.883551	-0.288632	0.742268	NM_001009640	Cirh1a	Rattus norvegicus cirrhosis, autosomal recessive 1A (human) (Cirh1a), mRNA [NM_001009640]	NM_001009640	FALSE
A_44_P272324	0.0452092	0.00198954	-0.275558	0.156453	0.281089	0.596451	0.959149	XM_343162	Mbd3_predicted	PREDICTED: Rattus norvegicus methyl-CpG binding domain protein 3 (predicted) (Mbd3_predicted), mRNA [XM_343162]	XM_343162	FALSE
A_44_P1046566	0.0166535	0.000260141	-0.065565	0.036993	0.203836	0.614607	1.04673	ENSRNOT00000004150	RGD1564623_predicted	Rattus norvegicus cDNA clone IMAGE:7193285 [BC087109]		FALSE
A_44_P249704	0.018495	0.000310616	-0.964581	-1.21998	-0.781134	-0.0859734	0.216528	NM_207611	Bhlhb9	Rattus norvegicus basic helix-loop-helix domain containing, class B, 9 (Bhlhb9), mRNA [NM_207611]	NM_207611	FALSE
A_44_P454882	0.00344429	1.04184e-05	0.81694	-0.0944016	-0.0513048	-0.0776207	-0.292348	A_44_P454882	A_44_P454882			FALSE
A_44_P944159	0.0401386	0.00149599	0.0133363	0.317678	-0.067376	-0.762787	-0.896637	A_44_P944159	A_44_P944159			FALSE
A_44_P863304	0.0497567	0.00253164	-1.8455	-0.923989	-0.0865159	-1.44304	-1.88348	AW529994	AW529994	AW529994 UI-R-C4-alc-g-09-0-UI.s1 UI-R-C4 Rattus norvegicus cDNA clone UI-R-C4-alc-g-09-0-UI 3', mRNA sequence [AW529994]	AW529994	FALSE
A_44_P581887	0.0212391	0.000394452	-0.0328704	-0.0703654	0.194243	0.401022	1.54907	CO388689	CO388689	AGENCOURT_26625193 NIH_MGC_253 Rattus norvegicus cDNA clone IMAGE:7304073 5', mRNA sequence [CO388689]	CO388689	FALSE
A_44_P503964	0.0395627	0.00144855	0.157413	0.0148759	-0.0106106	0.33424	0.803826	NM_001013870	Trmt1	Rattus norvegicus TRM1 tRNA methyltransferase 1 homolog (S. cerevisiae) (Trmt1), mRNA [NM_001013870]	NM_001013870	FALSE
A_44_P787133	0.0478307	0.00232226	-0.368344	-0.266534	0.754232	-0.511243	-0.842516	AA996533	AA996533	AA996533 UI-R-C0-he-d-12-0-UI.s1 UI-R-C0 Rattus norvegicus cDNA clone UI-R-C0-he-d-12-0-UI 3', mRNA sequence [AA996533]	AA996533	FALSE
A_44_P152329	0.0390735	0.0013883	0.388431	0.169048	0.292519	0.782853	1.53376	ENSRNOT00000030569	Chordc1_predicted	Rattus norvegicus similar to cysteine and histidine-rich domain (CHORD)-containing, zinc-binding protein 1 (LOC315447), mRNA [XM_235878]		FALSE
A_44_P428184	0.0401386	0.00149615	-2.17632	-1.05309	0.0764091	-1.32342	-1.81405	AI009411	AI009411	AI009411 EST203862 Normalized rat heart, Bento Soares Rattus sp. cDNA clone RHEBJ62 3' end, mRNA sequence [AI009411]	AI009411	FALSE
A_44_P497692	0.0221117	0.000415321	-0.0422775	-0.494046	-0.41601	0.107135	0.299545	ENSRNOT00000056215	ENSRNOT00000056215	similar to SH3-domain binding protein 3 (LOC688018), mRNA [Source:RefSeq_dna;Acc:XR_009418] [ENSRNOT00000056215]		FALSE
A_44_P136342	0.0208757	0.000376987	-0.726461	-0.936166	-0.936576	-0.141383	0.609519	NM_001024743	Ugp2	Rattus norvegicus UDP-glucose pyrophosphorylase 2 (Ugp2), mRNA [NM_001024743]	NM_001024743	FALSE
A_43_P23200	0.0394905	0.00143877	-0.0860258	-0.0687881	-0.132797	0.309085	0.847029	ENSRNOT00000019184	Ptges2_predicted	PREDICTED: Rattus norvegicus prostaglandin E synthase 2 (predicted) (Ptges2_predicted), mRNA [XM_231144]		FALSE
A_44_P253713	0.0492618	0.00249089	-0.596146	-0.183174	0.100824	-0.0517734	0.732585	CB546732	CB546732	CB546732 AMGNNUC:NRDG1-00185-A12-A nrdg1 (10855) Rattus norvegicus cDNA clone nrdg1-00185-a12 5', mRNA sequence [CB546732]	CB546732	FALSE
A_44_P180229	0.0224506	0.000441918	0.385059	-0.0635005	0.154371	-0.0472	-0.253024	XR_009137	RGD1565457_predicted	PREDICTED: Rattus norvegicus similar to Rasa4 protein (predicted) (RGD1565457_predicted), mRNA [XR_009137]	XR_009137	FALSE
A_43_P18374	0.0231146	0.000468162	-0.656969	-0.611218	-0.158197	-0.161978	0.401937	ENSRNOT00000014125	Plek2_predicted	PREDICTED: Rattus norvegicus pleckstrin 2 (predicted) (Plek2_predicted), mRNA [XM_234329]		FALSE
A_42_P789204	0.0325572	0.000950994	-0.0383027	0.110176	0.210531	-0.486328	-0.751641	XM_215057	RGD1564579_predicted	PREDICTED: Rattus norvegicus similar to yippee-like 3 (predicted) (RGD1564579_predicted), mRNA [XM_215057]	XM_215057	FALSE
A_43_P11729	0.0203029	0.000355761	0.246877	0.733578	0.760764	1.01434	2.02238	NM_013134	Hmgcr	Rattus norvegicus 3-hydroxy-3-methylglutaryl-Coenzyme A reductase (Hmgcr), mRNA [NM_013134]	NM_013134	FALSE
A_44_P531752	0.0057074	3.19512e-05	-0.321994	-0.287913	-0.0459657	0.366195	1.15653	NM_022400	Bcat2	Rattus norvegicus branched chain aminotransferase 2, mitochondrial (Bcat2), mRNA [NM_022400]	NM_022400	FALSE
A_44_P426558	0.0413288	0.0015871	-0.440658	-0.416398	-0.162318	0.381875	0.668855	NM_022229	Hspd1	Rattus norvegicus heat shock protein 1 (chaperonin) (Hspd1), mRNA [NM_022229]	NM_022229	FALSE
A_44_P217866	0.0186117	0.000316345	0.104092	0.925131	-0.626805	-1.31998	-2.37213	XR_009220	LOC310902	PREDICTED: Rattus norvegicus similar to Alcohol dehydrogenase 1A (Alcohol dehydrogenase alpha subunit) (LOC310902), mRNA [XR_009220]	XR_009220	FALSE
A_44_P538691	0.00855601	6.7212e-05	-0.400697	-0.414018	-0.304555	-0.124915	0.681514	NM_031772	Rpo1-4	Rattus norvegicus RNA polymerase 1-4 (Rpo1-4), mRNA [NM_031772]	NM_031772	FALSE
A_44_P989647	0.00723853	4.65315e-05	0.308001	0.275145	0.0589926	0.627777	1.59227	A_44_P989647	A_44_P989647			FALSE
A_44_P480749	0.0468273	0.00218239	0.226748	0.228081	0.22303	0.696529	0.995318	ENSRNOT00000044449	ENSRNOT00000044449	PREDICTED: Rattus norvegicus similar to Putative methyltransferase WBSCR22 (Williams-Beuren syndrome chromosome region 22 protein homolog) (LOC368084), mRNA [XM_347254]		FALSE
A_42_P808456	0.0419633	0.00166396	0.121526	0.44713	0.877054	0.663817	1.35682	ENSRNOT00000004834	Disp1_predicted	PREDICTED: Rattus norvegicus dispatched homolog 1 (Drosophila) (predicted) (Disp1_predicted), mRNA [XM_213964]		FALSE
A_42_P728032	0.0129925	0.000158961	-0.163237	-0.130891	0.0835699	-0.323044	-0.569904	XM_001066058	LOC683470	PREDICTED: Rattus norvegicus similar to growth arrest specific 1 (LOC683470), mRNA [XM_001066058]	XM_001066058	FALSE
A_42_P480108	0.0186117	0.000316777	-0.522583	-0.515153	0.02625	0.210718	0.346641	NM_001007637	mrpl24	Rattus norvegicus mitochondrial ribosomal protein L24 (mrpl24), mRNA [NM_001007637]	NM_001007637	FALSE
A_44_P546267	0.00227678	4.72216e-06	-0.10194	-0.168416	0.536113	0.786637	1.0932	A_44_P546267	A_44_P546267			FALSE
A_43_P12215	0.010715	0.000102555	-0.105996	0.153468	0.436587	0.123725	0.702327	NM_022386	Mafg	Rattus norvegicus v-maf musculoaponeurotic fibrosarcoma oncogene family, protein G (avian) (Mafg), mRNA [NM_022386]	NM_022386	FALSE
A_44_P288108	0.0337286	0.00100653	-0.640932	-0.416682	-0.199397	-0.0559264	0.322622	ENSRNOT00000001049	Abcf1	ATP-binding cassette sub-family F member 1 (ATP-binding cassette 50). [Source:Uniprot/SWISSPROT;Acc:Q6MG08] [ENSRNOT00000001049]		FALSE
A_42_P827677	0.0118963	0.000127405	-0.312213	-0.12057	0.346093	0.46747	0.822022	NM_001024783	Creld1	Rattus norvegicus cysteine-rich with EGF-like domains 1 (Creld1), mRNA [NM_001024783]	NM_001024783	FALSE
A_44_P730729	0.0154018	0.000221813	-0.369256	-0.0999348	0.101584	0.110222	0.732462	TC606738	TC606738	Q6CA39_YARLI (Q6CA39) Similarity, partial (5%) [TC606738]		FALSE
A_44_P103913	0.0465478	0.00216022	-1.3665	-0.579516	0.507151	-0.789847	-1.03844	AA944422	AA944422	AA944422 EST199921 Normalized rat embryo, Bento Soares Rattus sp. cDNA clone REMAJ01 3' end, mRNA sequence [AA944422]	AA944422	FALSE
A_42_P673212	0.00359125	1.19979e-05	-0.191572	-0.263006	0.151229	0.294859	0.999093	ENSRNOT00000039709	Cad	PREDICTED: Rattus norvegicus carbamyl phosphatate synthetase 2 (mapped) (Cad_mapped), mRNA [XM_343027]		FALSE
A_44_P288153	0.0118963	0.000127234	0.313333	0.0932801	0.447259	0.970965	1.53902	NM_019170	Cbr1	Rattus norvegicus carbonyl reductase 1 (Cbr1), mRNA [NM_019170]	NM_019170	FALSE
A_44_P1014420	0.034469	0.00106441	-0.059512	-0.136265	0.402409	0.141531	0.393128	ENSRNOT00000011589	RICS_predicted	PREDICTED: Rattus norvegicus RhoGAP involved in beta-catenin-N-cadherin and NMDA receptor signaling (predicted) (RICS_predicted), mRNA [XM_236020]		FALSE
A_44_P681227	0.0440428	0.00184721	-0.76437	-0.576184	0.0301589	-0.0464293	0.159566	AW143725	AW143725	AW143725 EST294021 Normalized rat embryo, Bento Soares Rattus sp. cDNA clone RGIBY81 5' end, mRNA sequence [AW143725]	AW143725	FALSE
A_44_P107972	0.00128653	1.3119e-06	0.549674	-0.0347991	0.0473671	0.0771636	-0.0941052	ENSRNOT00000061933	LOC685179	Rattus norvegicus similar to SWI/SNF-related matrix-associated actin-dependent regulator of chromatin c2 isoform a; mammalian chromatin remodeling complex BRG1-associated factor 170; chromatin remodeling complex BAF170 subunit; SWI3-like protein;...		FALSE
A_44_P415177	0.0211372	0.000384573	-0.51645	-0.322582	-0.068041	0.184001	0.628662	ENSRNOT00000014481	Xrn1_predicted	PREDICTED: Rattus norvegicus similar to Serine [XM_001062084]		FALSE
A_44_P323833	0.0349865	0.00108895	0.128812	-0.0665579	-0.0622232	0.306525	0.986161	ENSRNOT00000007303	ENSRNOT00000007303	cAMP-dependent protein kinase, alpha-catalytic subunit (EC 2.7.11.11) (PKA C-alpha). [Source:Uniprot/SWISSPROT;Acc:P27791] [ENSRNOT00000007303]		FALSE
A_43_P19059	0.0452092	0.00198659	0.370554	0.099965	-0.197764	0.172812	0.989914	ENSRNOT00000019056	RGD1560656_predicted	PREDICTED: Rattus norvegicus similar to nucleolar complex associated 3 homolog (LOC685468), mRNA [XR_006195]		FALSE
A_44_P109998	0.0484531	0.00241062	-0.00621378	0.517609	0.950697	0.172292	0.267535	XM_227287	RGD1562174_predicted	Rattus norvegicus similar to mKIAA1450 protein (LOC310538), mRNA [XM_227287]	XM_227287	FALSE
A_44_P313325	0.00677573	4.16027e-05	-0.39837	-0.0229549	0.329681	-0.0609272	-0.100128	AA819534	AA819534	AA819534 UI-R-A0-bf-f-05-0-UI.s1 UI-R-A0 Rattus norvegicus cDNA clone UI-R-A0-bf-f-05-0-UI 3' similar to gb [AA819534]	AA819534	FALSE
A_44_P388777	0.0320119	0.000926394	0.134479	0.00674176	0.230851	0.550855	0.995322	NM_053593	Cdk4	Rattus norvegicus cyclin-dependent kinase 4 (Cdk4), mRNA [NM_053593]	NM_053593	FALSE
A_44_P480623	0.0492318	0.00248715	0.522	0.182781	-0.382852	0.380808	1.36107	CO394106	CO394106	AGENCOURT_27822718 NIH_MGC_252 Rattus norvegicus cDNA clone IMAGE:7307113 5', mRNA sequence [CO394106]	CO394106	FALSE
A_44_P296468	0.0350242	0.00109421	-1.19075	-0.711849	-0.0791001	-0.947695	-1.26222	AI071174	AI071174	AI071174 UI-R-C2-my-d-02-0-UI.s1 UI-R-C2 Rattus norvegicus cDNA clone UI-R-C2-my-d-02-0-UI 3', mRNA sequence [AI071174]	AI071174	FALSE
A_44_P966746	0.0290924	0.000776137	0.424855	0.798247	0.29792	0.627203	0.147558	BG380804	BG380804	UI-R-CT0-bub-f-02-0-UI.s1 UI-R-CT0 Rattus norvegicus cDNA clone UI-R-CT0-bub-f-02-0-UI 3', mRNA sequence [BG380804]	BG380804	FALSE
A_44_P409645	0.0263593	0.000612869	0.28598	-0.129933	-0.286087	0.28592	0.560242	NM_001004247	Bmsc-UbP	Rattus norvegicus bone marrow stromal cell-derived ubiquitin-like protein (Bmsc-UbP), mRNA [NM_001004247]	NM_001004247	FALSE
A_44_P238424	0.0360258	0.00118731	-0.239706	0.346099	0.999257	0.252861	0.786504	NM_133515	Akap5	Rattus norvegicus A kinase (PRKA) anchor protein 5 (Akap5), mRNA [NM_133515]	NM_133515	FALSE
A_43_P16995	0.0356172	0.00113177	-0.131121	-0.115447	0.185484	0.338963	0.740699	NM_053757	Scye1	Rattus norvegicus small inducible cytokine subfamily E, member 1 (Scye1), mRNA [NM_053757]	NM_053757	FALSE
A_42_P788760	0.0270589	0.000656009	-0.188087	-0.263456	-0.0770161	-0.00887108	0.273097	ENSRNOT00000011378	Wdr21_predicted	PREDICTED: Rattus norvegicus WD repeat domain 21 (predicted) (Wdr21_predicted), mRNA [XM_343088]		FALSE
A_44_P588645	0.0358995	0.00117074	-0.0942351	-0.200655	-0.287983	-0.13096	0.630668	XM_228076	RGD1305633_predicted	PREDICTED: Rattus norvegicus similar to RIKEN cDNA 2600005C20 (predicted) (RGD1305633_predicted), mRNA [XM_228076]	XM_228076	FALSE
A_44_P513428	0.0184911	0.000306677	-0.0345804	0.00946093	0.0602813	0.446964	0.945525	NM_001012081	Polr3c	Rattus norvegicus polymerase (RNA) III (DNA directed) polypeptide C (Polr3c), mRNA [NM_001012081]	NM_001012081	FALSE
A_44_P161052	0.00344429	1.03704e-05	-0.762126	-0.577952	0.628504	0.344014	1.08007	NM_001040019	RGD1562373_predicted	Rattus norvegicus similar to 3-ketoacyl-CoA thiolase B, peroxisomal precursor (Beta-ketothiolase B) (predicted) (RGD1562373_predicted), mRNA [NM_001040019]	NM_001040019	FALSE
A_42_P737738	0.0355173	0.00111924	0.418893	-0.15415	0.211236	-0.0592346	-0.215025	NM_031663	Slc18a3	Rattus norvegicus solute carrier family 18 (vesicular acetylcholine), member 3 (Slc18a3), mRNA [NM_031663]	NM_031663	FALSE
A_44_P377731	0.0231956	0.000476479	0.314156	0.241416	0.128699	0.781366	1.47275	NM_001007651	Peflin	Rattus norvegicus PEF protein with a long N-terminal hydrophobic domain (Peflin), mRNA [NM_001007651]	NM_001007651	FALSE
A_44_P391057	0.0441691	0.00188738	0.603697	0.0811684	-0.557671	-0.722025	-0.975321	NM_199115	Angptl4	Rattus norvegicus angiopoietin-like 4 (Angptl4), mRNA [NM_199115]	NM_199115	FALSE
A_44_P130254	0.0426146	0.00174671	0.284943	0.0961417	0.178183	0.0642624	0.0072999	NM_173299	Np4	Rattus norvegicus defensin NP-4 precursor (Np4), mRNA [NM_173299]	NM_173299	FALSE
A_44_P137334	0.0203029	0.00035656	0.144349	-0.0516242	-0.0255573	0.525966	1.24958	NM_181474	Tfb1m	Rattus norvegicus transcription factor B1, mitochondrial (Tfb1m), mRNA [NM_181474]	NM_181474	FALSE
A_43_P20505	0.026641	0.000622403	0.389219	0.0492367	-0.16205	0.219332	0.478526	NM_001079938	Bbx_predicted	Rattus norvegicus bobby sox homolog (Drosophila) (predicted) (Bbx_predicted), mRNA [NM_001079938]	NM_001079938	FALSE
A_44_P315138	0.0253103	0.000559912	-0.192515	0.452267	0.952616	0.433507	0.795201	ENSRNOT00000021228	Prkrir_predicted	PREDICTED: Rattus norvegicus protein-kinase, interferon-inducible double stranded RNA dependent inhibitor, repressor of (P58 repressor) (predicted) (Prkrir_predicted), mRNA [XM_218949]		FALSE
A_44_P112371	0.04435	0.00190719	-0.0422432	-0.0566572	-0.308492	-0.380693	0.900003	ENSRNOT00000016660	RGD1563950_predicted	Rattus norvegicus similar to transcription factor NRF; ITBA4 gene (LOC298316), mRNA [XM_233308]		FALSE
A_44_P358654	0.0154669	0.000223449	1.83237	0.515708	0.442026	0.439809	-0.00415421	XM_219062	RGD1562061_predicted	PREDICTED: Rattus norvegicus similar to DUB-1 (predicted) (RGD1562061_predicted), mRNA [XM_219062]	XM_219062	FALSE
A_44_P362714	0.036178	0.00119395	0.206762	0.144842	0.785471	0.600253	1.06024	ENSRNOT00000002151	Bach1_predicted	PREDICTED: Rattus norvegicus BTB and CNC homology 1 (predicted), transcript variant 1 (Bach1_predicted), mRNA [XM_001067103]		FALSE
A_44_P896682	0.0364991	0.00121562	-0.00513685	0.223841	0.940688	0.160447	0.0437751	XM_001053087	LOC678766	PREDICTED: Rattus norvegicus similar to ras homolog gene family, member U (LOC678766), mRNA [XM_001053087]	XM_001053087	FALSE
A_44_P203349	0.0273333	0.000667598	0.0367651	-0.439439	-0.368797	-0.792124	-1.00034	NM_001047956	LOC500270	Rattus norvegicus 796 (LOC500270), mRNA [NM_001047956]	NM_001047956	FALSE
A_44_P285072	0.0475426	0.00226874	-1.13083	-0.478374	0.596414	-0.653887	-0.870323	AA955151	AA955151	AA955151 UI-R-A1-ez-d-03-0-UI.s2 UI-R-A1 Rattus norvegicus cDNA clone UI-R-A1-ez-d-03-0-UI 3' similar to gi [AA955151]	AA955151	FALSE
A_44_P133650	0.0158027	0.000234008	-0.873123	-0.711401	0.121903	0.302205	0.882881	ENSRNOT00000008298	Trim37_predicted	Rattus norvegicus similar to mKIAA0898 protein (LOC360592), mRNA [XM_340872]		FALSE
A_42_P668042	0.0274131	0.000671145	-0.134975	-0.133567	0.314336	0.5957	0.748747	NM_147138	Zwint	Rattus norvegicus ZW10 interactor (Zwint), mRNA [NM_147138]	NM_147138	FALSE
A_44_P131012	0.0222621	0.000429763	0.312922	-0.344576	-0.176053	0.339915	1.07046	NM_001014186	LOC362304	Rattus norvegicus similar to ORC5-related protein (LOC362304), mRNA [NM_001014186]	NM_001014186	FALSE
A_44_P1027405	0.00203963	2.9851e-06	-0.723484	-0.654221	-0.244756	-0.23466	0.194071	ENSRNOT00000019878	Raph1_predicted	Rattus norvegicus similar to amyotrophic lateral sclerosis 2 chromosome region candidate 9; putative GTPase regulator (LOC363239), mRNA [XM_343579]		FALSE
A_44_P169677	0.0356172	0.0011285	-1.00426	-0.771891	-0.220957	-1.05898	-1.04417	BQ779899	BQ779899	BQ779899 UI-R-FF0-cox-m-16-0-UI.s1 NCI_CGAP_FF0 Rattus norvegicus cDNA clone UI-R-FF0-cox-m-16-0-UI 3', mRNA sequence [BQ779899]	BQ779899	FALSE
A_44_P790393	0.0430257	0.00177542	-0.243008	-0.46729	-0.766037	0.151064	0.881032	CK603271	LOC681708	AGENCOURT_17895151 NIH_MGC_234 Rattus norvegicus cDNA clone IMAGE:7192830 5', mRNA sequence [CK603271]	CK603271	FALSE
A_44_P1034068	0.03933	0.00140961	-0.365237	-0.00565648	0.573995	-0.118116	-0.263965	BC105769	BC105769	Rattus norvegicus cDNA clone IMAGE:7930328 [BC105769]	BC105769	FALSE
A_44_P530975	0.0130809	0.000160632	-1.04498	-0.873222	0.0892339	-0.560334	-0.869689	BE097240	BE097240	BE097240 UI-R-BO1-apv-a-03-0-UI.s1 UI-R-BO1 Rattus norvegicus cDNA clone UI-R-BO1-apv-a-03-0-UI 3', mRNA sequence [BE097240]	BE097240	FALSE
A_44_P1020967	0.0260625	0.000590672	0.15911	0.335587	0.613115	0.606691	1.28555	ENSRNOT00000021952	ENSRNOT00000021952	Rattus norvegicus similar to Wolf-Hirschhorn syndrome candidate 1 protein isoform 1; IL5 promoter REII region-binding protein; trithorax/ash1-related protein 5; multiple myeloma SET domain protein (LOC305456), mRNA [XM_223540]		FALSE
A_43_P11221	0.044714	0.00195006	-0.252087	-0.252168	-0.0595006	-0.0172058	0.519369	BC091419	Afg3l2	Rattus norvegicus AFG3(ATPase family gene 3)-like 2 (yeast), mRNA (cDNA clone IMAGE:7365290), complete cds. [BC091419]	BC091419	FALSE
A_44_P379940	0.0284967	0.000742996	0.323297	0.58867	0.561025	-0.11565	1.05074	ENSRNOT00000046286	ENSRNOT00000046286	similar to epidermis-specific serine protease-like (LOC365835), mRNA [Source:RefSeq_dna;Acc:XR_008837] [ENSRNOT00000046286]		FALSE
A_44_P142952	0.0292361	0.00078535	-0.73222	-0.33998	0.667216	-0.211706	-0.590977	BE111679	BE111679	BE111679 UI-R-BJ1-avv-e-09-0-UI.s1 UI-R-BJ1 Rattus norvegicus cDNA clone UI-R-BJ1-avv-e-09-0-UI 3', mRNA sequence [BE111679]	BE111679	FALSE
A_44_P182221	0.00238709	5.28071e-06	-0.403847	-0.200806	-0.195865	0.895232	1.89519	NM_012577	Gstp1	Rattus norvegicus glutathione-S-transferase, pi 1 (Gstp1), mRNA [NM_012577]	NM_012577	FALSE
A_44_P327830	0.00203963	3.51861e-06	-0.573828	-0.510747	-0.22934	0.128232	0.857718	NM_182674	Bysl	Rattus norvegicus bystin-like (Bysl), mRNA [NM_182674]	NM_182674	FALSE
A_44_P149563	0.0317463	0.000894907	0.0688251	-0.304834	-0.136576	-0.294546	0.478842	ENSRNOT00000036187	RGD1561579_predicted	PREDICTED: Rattus norvegicus similar to Hypothetical protein 6820429M01 (predicted) (RGD1561579_predicted), mRNA [XM_219364]		FALSE
A_44_P405352	0.0478307	0.00233721	0.62239	0.641917	0.748148	0.676415	0.13023	XM_344323	XM_344323	Rattus norvegicus similar to 3632451O06Rik protein (LOC364296), mRNA [XM_344323]	XM_344323	FALSE
A_42_P608780	0.0483949	0.00240554	0.0509655	-0.12144	0.633226	0.883413	0.96419	NM_019216	Gdf15	Rattus norvegicus growth differentiation factor 15 (Gdf15), mRNA [NM_019216]	NM_019216	FALSE
A_44_P370175	0.0227759	0.000450377	-0.107301	-0.128414	-0.325481	-0.187241	0.788418	NM_031773	Rpo1-2	Rattus norvegicus RNA polymerase 1-2 (Rpo1-2), mRNA [NM_031773]	NM_031773	FALSE
A_44_P155816	0.0156057	0.00022658	-0.504162	-0.319607	0.327793	-0.340123	-0.33445	NM_012947	Eef2k	Rattus norvegicus eukaryotic elongation factor-2 kinase (Eef2k), mRNA [NM_012947]	NM_012947	FALSE
A_44_P1057403	0.0292436	0.000786871	-0.749223	-0.541002	-0.11484	-0.722595	-1.05342	XM_220982	Ptrf_predicted	PREDICTED: Rattus norvegicus polymerase I and transcript release factor (predicted) (Ptrf_predicted), mRNA [XM_220982]	XM_220982	FALSE
A_43_P11444	0.0340844	0.00102285	-0.328367	0.114582	-0.226821	-1.43439	-1.84179	NM_012521	S100g	Rattus norvegicus S100 calcium binding protein G (S100g), mRNA [NM_012521]	NM_012521	FALSE
A_44_P1019324	0.0057074	2.78053e-05	-1.00551	-0.662852	0.0369399	-0.0385095	0.146531	NM_199372	Eif4a1	Rattus norvegicus eukaryotic translation initiation factor 4A1 (Eif4a1), mRNA [NM_199372]	NM_199372	FALSE
A_44_P238237	0.0269913	0.000648152	-0.313266	-0.0745783	0.794913	0.375188	-0.145384	NM_012531	Comt	Rattus norvegicus catechol-O-methyltransferase (Comt), mRNA [NM_012531]	NM_012531	FALSE
A_44_P368065	0.0445201	0.00192065	0.655881	0.13058	0.212098	-0.0355272	-0.411474	NM_001013054	Adprhl1	Rattus norvegicus ADP-ribosylhydrolase like 1 (Adprhl1), mRNA [NM_001013054]	NM_001013054	FALSE
A_44_P795878	0.0497567	0.0025309	1.01559	0.920762	0.430866	0.737477	0.0272452	TC647780	TC647780			FALSE
A_43_P17246	0.0245865	0.000532799	0.0729458	-0.213127	0.0626394	0.542758	1.2742	ENSRNOT00000026552	Ipo4_predicted	PREDICTED: Rattus norvegicus importin 4 (predicted) (Ipo4_predicted), mRNA [XM_214199]		FALSE
A_44_P387760	0.0486348	0.00242527	-2.11382	-1.55993	-0.852144	-1.69598	-1.88835	AI029212	AI029212	UI-R-C0-ip-e-06-0-UI.s1 UI-R-C0 Rattus norvegicus cDNA clone UI-R-C0-ip-e-06-0-UI 3', mRNA sequence [AI029212]	AI029212	FALSE
A_44_P326124	0.0475426	0.00226846	0.60573	0.111514	-0.385917	0.402062	1.28301	XM_001056105	LOC679385	PREDICTED: Rattus norvegicus similar to heat shock protein 8 (LOC679385), mRNA [XM_001056105]	XM_001056105	FALSE
A_43_P17615	0.0340954	0.00103287	0.231298	-0.236873	-0.195436	0.180222	0.634774	ENSRNOT00000017818	RGD1306924_predicted	PREDICTED: Rattus norvegicus similar to Gamma-tubulin complex component 4 (GCP-4) (predicted) (RGD1306924_predicted), mRNA [XM_001076537]		FALSE
A_44_P684379	0.0499234	0.00254463	-0.245141	0.0602336	0.33933	1.91087	0.869752	TC596778	TC596778	Q25LL7_MACFA (Q25LL7) Brain cDNA, clone: QflA-10409, partial (25%) [TC596778]		FALSE
A_44_P117431	0.0454731	0.00205617	0.064581	-0.211885	-0.267192	-0.387336	-0.514788	NM_001044233	RGD1565373_predicted	Rattus norvegicus similar to CD69 antigen (p60, early T-cell activation antigen) (predicted) (RGD1565373_predicted), mRNA [NM_001044233]	NM_001044233	FALSE
A_44_P266519	0.034401	0.00105455	0.09284	-0.191907	0.0586637	-0.0939065	0.451163	NM_001047104	LOC361128	Rattus norvegicus similar to TR4 orphan receptor associated protein TRA16 (LOC361128), mRNA [NM_001047104]	NM_001047104	FALSE
A_44_P300183	0.00841708	6.45958e-05	0.275392	0.04008	-0.016721	0.422829	1.02929	BC105856	LOC300191	Rattus norvegicus similar to RIKEN cDNA 4930570C03, mRNA (cDNA clone IMAGE:7455733), complete cds. [BC105856]	BC105856	FALSE
A_43_P21046	0.0323829	0.000942978	0.162503	0.144566	-0.0170983	1.76743	0.204884	ENSRNOT00000009900	Plxna2_predicted	PREDICTED: Rattus norvegicus plexin A2 (predicted) (Plxna2_predicted), mRNA [XM_223080]		FALSE
A_44_P809374	0.0105574	0.000100569	-0.32453	0.205327	0.539192	0.328539	0.803858	NM_207615	Clcf1	Rattus norvegicus cardiotrophin-like cytokine factor 1 (Clcf1), mRNA [NM_207615]	NM_207615	FALSE
A_44_P854339	0.0168444	0.000264643	-0.47348	0.787469	2.51398	0.763897	0.29169	TC608617	TC608617	Q70US4_DIRIM (Q70US4) NADH dehydrogenase 6, partial (8%) [TC608617]		FALSE
A_44_P1048048	0.0452092	0.00199467	-0.258419	0.177495	0.690961	0.325403	0.876713	ENSRNOT00000056592	Pabpc4	Pabpc4 protein (Fragment). [Source:Uniprot/SPTREMBL;Acc:Q5I0G7] [ENSRNOT00000056592]		FALSE
A_43_P16887	0.0453721	0.00203466	0.752602	0.207389	0.597112	-0.198222	-0.333553	XM_215059	Eraf_predicted	PREDICTED: Rattus norvegicus erythroid associated factor (predicted) (Eraf_predicted), mRNA [XM_215059]	XM_215059	FALSE
A_44_P354255	0.00822611	6.16494e-05	0.560945	-0.0920436	0.0615936	1.53723	2.15417	XR_007019	LOC691091	PREDICTED: Rattus norvegicus similar to heat shock protein 1, alpha (LOC691091), mRNA [XR_007019]	XR_007019	FALSE
A_42_P685368	0.0413288	0.00158971	-0.0557438	-0.533548	-0.364282	-0.584827	-0.676229	NM_001013109	Dapk2	Rattus norvegicus death-associated kinase 2 (Dapk2), mRNA [NM_001013109]	NM_001013109	FALSE
A_44_P419239	0.0269159	0.000637586	-0.501071	0.306272	1.10927	0.642137	0.453279	NM_022595	Pdap1	Rattus norvegicus PDGFA associated protein 1 (Pdap1), mRNA [NM_022595]	NM_022595	FALSE
A_44_P478570	0.00092522	6.23228e-07	-0.267642	-0.205441	0.116875	0.0561051	0.855126	ENSRNOT00000055250	Gcn5l2_predicted	PREDICTED: Rattus norvegicus GCN5 general control of amino acid synthesis-like 2 (yeast) (predicted) (Gcn5l2_predicted), mRNA [XM_239340]		FALSE
A_44_P790431	0.0122475	0.000136625	0.270435	0.0489467	0.0387719	-0.0658411	-0.293955	ENSRNOT00000060252	LOC290098	similar to T cell receptor V-alpha J-alpha [Source:RefSeq_peptide;Acc:NP_001034294] [ENSRNOT00000060252]		FALSE
A_44_P1030747	0.0164783	0.000250709	-0.25253	-0.383207	0.00148988	0.463797	0.650376	BC062051	Bspry	Rattus norvegicus B-box and SPRY domain containing, mRNA (cDNA clone IMAGE:5598845), partial cds [BC062051]	BC062051	FALSE
A_44_P501843	0.0242233	0.000520554	-0.619169	-0.315547	0.116787	0.244436	0.371774	NM_001008322	Shmt2	Rattus norvegicus serine hydroxymethyltransferase 2 (mitochondrial) (Shmt2), mRNA [NM_001008322]	NM_001008322	FALSE
A_42_P671601	0.0419633	0.00166527	0.317617	0.169157	0.42736	0.787821	1.11869	NM_138901	Pigl	Rattus norvegicus phosphatidylinositol glycan, class L (Pigl), mRNA [NM_138901]	NM_138901	FALSE
A_44_P130175	0.0470136	0.00220953	-1.60651	-0.990361	0.0191824	-1.09085	-1.37645	BQ204899	BQ204899	BQ204899 UI-R-EP0-cnv-e-22-0-UI.s1 UI-R-EP0 Rattus norvegicus cDNA clone UI-R-EP0-cnv-e-22-0-UI 3', mRNA sequence [BQ204899]	BQ204899	FALSE
A_44_P155835	0.0426979	0.00175611	-1.05108	-0.6809	-0.246714	-0.600759	-0.690524	AA893860	AA893860	AA893860 EST197663 Normalized rat placenta, Bento Soares Rattus sp. cDNA clone RPLAM73 3' end, mRNA sequence [AA893860]	AA893860	FALSE
A_44_P1002280	0.00841708	6.38452e-05	-0.197243	-0.331598	0.161314	0.335745	0.628397	NM_213610	RGD1302996	Rattus norvegicus hypothetical protein MGC:15854 (RGD1302996), mRNA [NM_213610]	NM_213610	FALSE
A_44_P402760	0.0341574	0.00103629	0.199436	-0.117868	-0.0203797	0.0451469	0.0171561	NM_031604	Atp6v0a1	Rattus norvegicus ATPase, H+ transporting, lysosomal V0 subunit A1 (Atp6v0a1), mRNA [NM_031604]	NM_031604	FALSE
A_44_P367550	0.0399134	0.001474	-0.35441	-0.279084	-0.0245721	-0.116089	0.577077	NM_175843	Sqstm1	Rattus norvegicus sequestosome 1 (Sqstm1), transcript variant 1, mRNA [NM_175843]	NM_175843	FALSE
A_44_P367551	0.028277	0.000722563	-0.511289	-0.289805	-0.10784	-0.184547	0.523599	NM_175843	Sqstm1	Rattus norvegicus sequestosome 1 (Sqstm1), transcript variant 1, mRNA [NM_175843]	NM_175843	FALSE
A_44_P338680	0.008334	6.28342e-05	-0.181925	0.0385444	0.755988	0.801226	0.845464	NM_053835	Cltb	Rattus norvegicus clathrin, light polypeptide (Lcb) (Cltb), mRNA [NM_053835]	NM_053835	FALSE
A_44_P415284	0.0405799	0.0015289	-1.20569	-0.381074	0.230179	-0.534601	-0.911484	AA900501	AA900501	AA900501 UI-R-E0-dl-b-03-0-UI.s1 UI-R-E0 Rattus norvegicus cDNA clone UI-R-E0-dl-b-03-0-UI 3' similar to gi [AA900501]	AA900501	FALSE
A_44_P321544	0.0278204	0.000696361	-0.0791869	-0.125535	-0.303542	0.540657	1.00273	ENSRNOT00000011572	Slc41a2_predicted	PREDICTED: Rattus norvegicus solute carrier family 41, member 2 (predicted) (Slc41a2_predicted), mRNA [XM_343191]		FALSE
A_44_P577612	0.00774401	5.31418e-05	-0.189318	-0.21249	0.0644594	0.178468	1.23618	TC612583	TC612583	Q7NW84_CHRVO (Q7NW84) Probable transcriptional regulator, partial (7%) [TC612583]		FALSE
A_44_P837888	0.0471211	0.0022231	-0.579205	-0.351473	0.100312	-0.145757	0.136302	NM_001007710	Acpl2	Rattus norvegicus acid phosphatase-like 2 (Acpl2), mRNA [NM_001007710]	NM_001007710	FALSE
A_44_P304825	0.0413288	0.00157741	0.724749	0.541694	0.7277	1.50118	1.96363	XR_006212	LOC302786	PREDICTED: Rattus norvegicus similar to Heat shock protein HSP 90-beta (HSP 84) (LOC302786), mRNA [XR_006212]	XR_006212	FALSE
A_44_P540099	0.0297309	0.000809128	-1.43402	-0.473634	0.892004	-0.468933	-0.824994	AA944007	AA944007	AA944007 EST199506 Normalized rat embryo, Bento Soares Rattus sp. cDNA clone REMAA30 3' end, mRNA sequence [AA944007]	AA944007	FALSE
A_42_P676860	0.0356172	0.00114896	-0.839678	-0.900754	-0.525021	-0.263445	0.227143	ENSRNOT00000003974	ENSRNOT00000003974	PREDICTED: Rattus norvegicus hypothetical LOC287388 (predicted) (RGD1310324_predicted), mRNA [XR_009188]		FALSE
A_44_P147702	0.042535	0.00173558	-0.283136	-0.566791	-0.69486	-0.281835	0.493403	ENSRNOT00000019044	RGD1311017_predicted	PREDICTED: Rattus norvegicus similar to multiple hat domains (predicted) (RGD1311017_predicted), mRNA [XM_340853]		FALSE
A_44_P972866	0.0410936	0.00156285	-0.324927	0.0695877	0.457078	-0.205503	-0.230701	XM_341118	Plekha6_predicted	PREDICTED: Rattus norvegicus pleckstrin homology domain containing, family A member 6 (predicted) (Plekha6_predicted), mRNA [XM_341118]	XM_341118	FALSE
A_44_P406874	0.048032	0.0023678	-1.13427	-0.370851	0.152614	-0.201121	-0.406298	AI169370	AI169370	AI169370 EST215214 Normalized rat kidney, Bento Soares Rattus sp. cDNA clone RKIBR40 3' end, mRNA sequence [AI169370]	AI169370	FALSE
A_44_P182881	0.0446484	0.00192905	-0.00889969	0.140424	0.594052	0.139828	0.466243	NM_001013160	Rnf36	Rattus norvegicus ring finger protein 36 (Rnf36), mRNA [NM_001013160]	NM_001013160	FALSE
A_44_P107766	0.0274131	0.000674498	-0.591698	-0.743321	0.123175	0.166348	0.363706	NM_001013918	RGD1309540	Rattus norvegicus similar to hypothetical protein MGC40841; similar to hypothetical protein MGC4707 (RGD1309540), mRNA [NM_001013918]	NM_001013918	FALSE
A_44_P485948	0.0273333	0.000666771	-0.31936	0.00354075	0.154257	-0.663761	-0.784781	XM_222184	Cutl2_predicted	PREDICTED: Rattus norvegicus cut-like 2 (Drosophila) (predicted) (Cutl2_predicted), mRNA [XM_222184]	XM_222184	FALSE
A_44_P911768	0.00405534	1.46468e-05	0.261656	-0.320347	-0.227662	-0.426787	-0.474262	XM_001077248	Hcn2	PREDICTED: Rattus norvegicus hyperpolarization activated cyclic nucleotide-gated potassium channel 2 (Hcn2), mRNA [XM_001077248]	XM_001077248	FALSE
A_44_P1057707	0.0129925	0.000158683	-0.249769	-0.366219	-0.507162	0.339623	1.04573	NM_199083	LOC289809	Rattus norvegicus putatative 28 kDa protein (LOC289809), mRNA [NM_199083]	NM_199083	FALSE
A_44_P520840	0.0261273	0.000595679	-0.165637	-0.0800222	0.498331	0.155439	0.589973	ENSRNOT00000012114	ENSRNOT00000012114	PREDICTED: Rattus norvegicus similar to Programmed cell death 6 interacting protein (ALG-2 interacting protein X) (predicted) (RGD1561176_predicted), mRNA [XM_343494]		FALSE
A_42_P671364	0.018495	0.000309393	-0.26417	-0.310393	0.250538	0.601327	0.794168	NM_053631	Banf1	Rattus norvegicus barrier to autointegration factor 1 (Banf1), mRNA [NM_053631]	NM_053631	FALSE
A_44_P990532	0.0118963	0.000128899	-0.295544	-0.723403	-0.656548	-0.30102	0.0898513	ENSRNOT00000018185	ENSRNOT00000018185	Ddx17 protein. [Source:Uniprot/SPTREMBL;Acc:Q568Z8] [ENSRNOT00000018185]		FALSE
A_44_P219411	0.0419303	0.00165431	-1.23712	-0.673388	-0.208945	-0.623037	-0.43678	BF396295	BF396295	BF396295 UI-R-BS2-bdw-e-04-0-UI.s1 UI-R-BS2 Rattus norvegicus cDNA clone UI-R-BS2-bdw-e-04-0-UI 3', mRNA sequence [BF396295]	BF396295	FALSE
A_44_P433157	0.00683489	4.25831e-05	-0.237955	0.0772579	0.472111	0.341694	1.19153	NM_031745	Rsn	Rattus norvegicus restin (Reed-Steinberg cell-expressed intermediate filament-associated protein) (Rsn), mRNA [NM_031745]	NM_031745	FALSE
A_42_P710191	0.042116	0.00168464	-0.264542	0.0958471	0.692585	-0.29063	-0.0992879	XM_225559	XM_225559	Rattus norvegicus similar to TAFII140 protein (LOC307109), mRNA [XM_225559]	XM_225559	FALSE
A_44_P325285	0.00871867	7.12756e-05	-0.204027	-0.313173	-0.939225	-1.78571	-1.68062	NM_001012122	Ecgf1	Rattus norvegicus endothelial cell growth factor 1 (platelet-derived) (Ecgf1), mRNA [NM_001012122]	NM_001012122	FALSE
A_44_P138036	0.0393495	0.00143008	0.264996	0.0206449	0.225816	-0.157664	-0.326558	XM_577662	LOC502201	PREDICTED: Rattus norvegicus similar to CG8272-PA (LOC502201), mRNA [XM_577662]	XM_577662	FALSE
A_43_P15866	0.0364991	0.00122973	0.0938022	-0.254148	-0.148917	0.0317227	0.672974	ENSRNOT00000021419	Ap1g1	Gamma-adaptin (Fragment). [Source:Uniprot/SPTREMBL;Acc:Q8R525] [ENSRNOT00000021419]		FALSE
A_43_P19216	0.0160662	0.000238635	0.294705	-0.198421	-0.038626	-0.078308	0.0130105	NM_001039610	RGD1306773	Rattus norvegicus hypothetical LOC315863 (RGD1306773), mRNA [NM_001039610]	NM_001039610	FALSE
A_44_P558048	0.00619697	3.66503e-05	-0.85616	-0.236959	0.0532283	-0.0561054	0.661499	NM_001033897	RGD1309387	Rattus norvegicus similar to cDNA sequence AF155546 (RGD1309387), mRNA [NM_001033897]	NM_001033897	FALSE
A_44_P351301	0.00878491	7.25796e-05	-0.223014	-0.0516014	0.176808	0.454376	0.940036	NM_001004206	Pa2g4	Rattus norvegicus proliferation-associated 2G4 (Pa2g4), mRNA [NM_001004206]	NM_001004206	FALSE
A_43_P10163	0.0301613	0.00083199	0.340709	0.0597212	-0.140244	0.649834	1.09006	NM_001013170	Wars	Rattus norvegicus tryptophanyl-tRNA synthetase (Wars), mRNA [NM_001013170]	NM_001013170	FALSE
A_43_P10981	0.0419303	0.00164362	-0.213543	0.11599	0.158179	0.674292	1.1641	CB605839	CB605839	CB605839 AMGNNUC:NRDG1-00088-D2-A nrdg1 (10855) Rattus norvegicus cDNA clone nrdg1-00088-d2 5', mRNA sequence [CB605839]	CB605839	FALSE
A_44_P137047	0.0340954	0.00102859	-0.775629	-0.686737	-0.330208	-0.811925	-1.08442	BQ191785	Rpl37	UI-R-DY0-cmh-n-06-0-UI.s1 UI-R-DY0 Rattus norvegicus cDNA clone UI-R-DY0-cmh-n-06-0-UI 3', mRNA sequence [BQ191785]	BQ191785	FALSE
A_44_P612762	0.0416194	0.00160653	-0.417295	-0.739538	-0.878899	-0.890423	-0.788455	NM_001037179	Lrrc8c	Rattus norvegicus leucine rich repeat containing 8 family, member C (Lrrc8c), mRNA [NM_001037179]	NM_001037179	FALSE
A_44_P229376	0.0278204	0.000697079	-0.134966	-0.208933	0.0320929	0.144682	1.13097	NM_001006958	Sdad1	Rattus norvegicus SDA1 domain containing 1 (Sdad1), mRNA [NM_001006958]	NM_001006958	FALSE
A_42_P577136	0.048032	0.00237046	0.0283509	0.334335	0.861702	0.67815	0.458804	NM_001033924	Fcer2a	Rattus norvegicus Fc receptor, IgE, low affinity II, alpha polypeptide (Fcer2a), transcript variant 1, mRNA [NM_001033924]	NM_001033924	FALSE
A_44_P591772	0.0176208	0.000280819	-0.273395	-0.65643	-0.139543	0.160811	1.07654	DV718643	DV718643	RVL9257 Wackym-Soares normalized rat vestibular cDNA library Rattus norvegicus cDNA 5', mRNA sequence [DV718643]	DV718643	FALSE
A_44_P358627	0.0421885	0.00169194	-0.162057	0.377544	0.738455	0.213453	0.0819638	ENSRNOT00000055831	ENSRNOT00000055831	Rattus norvegicus similar to Chromodomain-helicase-DNA-binding protein 2 (CHD-2) (LOC308738), mRNA [XM_218790]		FALSE
A_44_P194939	0.00128653	1.43312e-06	-0.880208	0.506043	2.47461	0.275463	-0.311193	BF548548	BF548548	UI-R-A0-at-g-04-0-UI.r1 UI-R-A0 Rattus norvegicus cDNA clone UI-R-A0-at-g-04-0-UI 5', mRNA sequence [BF548548]	BF548548	FALSE
A_44_P993914	0.0299844	0.00082034	-0.062513	-0.190581	-0.0907146	-0.743902	-0.769747	NM_001014125	Pdia5	Rattus norvegicus protein disulfide isomerase-associated 5 (Pdia5), mRNA [NM_001014125]	NM_001014125	FALSE
A_44_P375561	0.0308935	0.000861949	0.366339	-0.195733	-0.116666	-0.0704802	-0.114125	NM_019146	Bsn	Rattus norvegicus bassoon (Bsn), mRNA [NM_019146]	NM_019146	FALSE
A_44_P283444	0.048032	0.00236516	0.0929818	0.0354322	0.150899	0.0678368	0.619201	NM_017299	Slc19a1	Rattus norvegicus solute carrier family 19, member 1 (Slc19a1), transcript variant 1, mRNA [NM_017299]	NM_017299	FALSE
A_44_P220054	0.0238115	0.000500911	-0.323229	0.0976026	0.575472	-0.377234	-0.414381	ENSRNOT00000004199	RGD1561961_predicted	PREDICTED: Rattus norvegicus similar to IQ motif and WD repeats 1 (predicted) (RGD1561961_predicted), mRNA [XM_213926]		FALSE
A_44_P129666	0.0166144	0.000255779	-1.19788	-0.681173	-0.209457	-1.03315	-1.23978	AI717054	AI717054	AI717054 UI-R-Y0-acu-d-09-0-UI.s1 UI-R-Y0 Rattus norvegicus cDNA clone UI-R-Y0-acu-d-09-0-UI 3', mRNA sequence [AI717054]	AI717054	FALSE
A_44_P1002452	0.00324596	9.02972e-06	-0.0450165	0.12314	0.518496	0.35948	0.676071	NM_001009271	Nt5dc2	Rattus norvegicus 5'-nucleotidase domain containing 2 (Nt5dc2), mRNA [NM_001009271]	NM_001009271	FALSE
A_44_P634909	0.0498712	0.00253972	0.00428021	-0.490933	-0.236892	-0.233064	-0.434792	BI294052	BI294052	BI294052 UI-R-DK0-cdy-g-12-0-UI.s1 UI-R-DK0 Rattus norvegicus cDNA clone UI-R-DK0-cdy-g-12-0-UI 3', mRNA sequence [BI294052]	BI294052	FALSE
A_44_P442976	0.0358995	0.0011772	-0.0077821	-0.124213	-0.00355482	0.30963	0.758589	NM_001012065	Adck4	Rattus norvegicus aarF domain containing kinase 4 (Adck4), mRNA [NM_001012065]	NM_001012065	FALSE
A_44_P316002	0.0477197	0.00228365	-0.821276	-0.522627	-0.150915	0.575394	1.88331	NM_022941	Nr1i3	Rattus norvegicus nuclear receptor subfamily 1, group I, member 3 (Nr1i3), mRNA [NM_022941]	NM_022941	FALSE
A_42_P497393	0.0364991	0.00122347	-0.316544	0.161783	0.349441	0.0214342	0.673325	AI008316	AI008316	AI008316 EST202767 Normalized rat embryo, Bento Soares Rattus sp. cDNA clone REMAV79 3' end, mRNA sequence [AI008316]	AI008316	FALSE
A_44_P1037217	0.0253155	0.000562313	-0.2836	-0.0760996	0.524572	0.148561	0.358708	ENSRNOT00000003832	RGD1565486_predicted	Rattus norvegicus similar to RIKEN cDNA 2610015J01 (LOC302931), mRNA [XM_220157]		FALSE
A_44_P391068	0.0327275	0.000958922	0.0538878	0.191416	0.588671	0.985993	1.23257	NM_020540	Gstm4	Rattus norvegicus glutathione S-transferase M4 (Gstm4), mRNA [NM_020540]	NM_020540	FALSE
A_44_P471166	0.0057074	3.03263e-05	-0.427242	-0.289835	-0.0222003	-0.0646887	0.710082	NM_001037201	Ddx21a	Rattus norvegicus DEAD (Asp-Glu-Ala-Asp) box polypeptide 21a (Ddx21a), mRNA [NM_001037201]	NM_001037201	FALSE
A_44_P430989	0.0256796	0.000576198	-0.913464	-0.762909	-0.402555	-0.318592	0.240582	NM_138914	Fnbp1	Rattus norvegicus formin binding protein 1 (Fnbp1), mRNA [NM_138914]	NM_138914	FALSE
A_44_P525392	0.0430257	0.00177454	-0.484141	-0.413896	-0.306321	0.0891665	0.575844	ENSRNOT00000014832	Nup205_predicted	PREDICTED: Rattus norvegicus nucleoporin 205kDa (predicted) (Nup205_predicted), mRNA [XM_342657]		FALSE
A_44_P690194	0.0168887	0.000266102	0.0772891	0.0178326	-0.00476253	0.55752	1.08201	BG664107	BG664107	DRAADD04 Rat DRG Library Rattus norvegicus cDNA clone DRAADD04 5', mRNA sequence [BG664107]	BG664107	FALSE
A_44_P193195	0.0375305	0.00128942	-0.203719	-0.0699016	-0.0499693	0.246283	0.81161	XM_222152	Sbno1	PREDICTED: Rattus norvegicus sno, strawberry notch homolog 1 (Drosophila) (Sbno1), mRNA [XM_222152]	XM_222152	FALSE
A_44_P184817	0.0057074	2.98315e-05	-0.28535	-0.0831122	0.216245	0.420981	0.969864	NM_080892	Selenbp1	Rattus norvegicus selenium binding protein 2 (Selenbp1), mRNA [NM_080892]	NM_080892	FALSE
A_44_P592008	0.048032	0.00237233	-0.179186	-0.120144	0.0189465	-0.206601	0.500845	TC619361	TC619361	Q2YFS5_MOUSE (Q2YFS5) BIPL1, partial (3%) [TC619361]		FALSE
A_44_P1019326	0.0185537	0.000312747	-0.589611	-0.493248	0.0267998	0.169588	0.371239	NM_199372	Eif4a1	Rattus norvegicus eukaryotic translation initiation factor 4A1 (Eif4a1), mRNA [NM_199372]	NM_199372	FALSE
A_44_P754987	0.0364991	0.00121407	0.450672	0.0433054	-0.33843	0.678959	1.461	XM_235878	Chordc1_predicted	PREDICTED: Rattus norvegicus cysteine and histidine-rich domain (CHORD)-containing, zinc-binding protein 1 (predicted) (Chordc1_predicted), mRNA [XM_235878]	XM_235878	FALSE
A_44_P1023637	0.000774543	4.54585e-07	-0.10772	-0.160108	1.16672	1.8902	2.86382	NM_001007006	Dusp13	Rattus norvegicus dual specificity phosphatase 13 (Dusp13), mRNA [NM_001007006]	NM_001007006	FALSE
A_44_P355663	0.0419633	0.00166336	-1.54273	-1.06379	-0.617712	-1.12818	-1.54712	AI044782	AI044782	AI044782 UI-R-C1-jt-c-02-0-UI.s1 UI-R-C1 Rattus norvegicus cDNA clone UI-R-C1-jt-c-02-0-UI 3', mRNA sequence [AI044782]	AI044782	FALSE
A_44_P685139	0.0139748	0.000177288	0.00675631	0.531689	0.985332	1.61186	1.92489	XM_001079386	LOC687611	PREDICTED: Rattus norvegicus similar to transmembrane protein induced by tumor necrosis factor alpha (LOC687611), mRNA [XM_001079386]	XM_001079386	FALSE
A_44_P1028477	0.0163875	0.000247848	-0.409406	0.0934164	1.19372	0.276636	0.0576491	ENSRNOT00000029202	Atf6_predicted	Rattus norvegicus similar to Cyclic-AMP-dependent transcription factor ATF-6 alpha (Activating transcription factor 6 alpha) (ATF6-alpha) (LOC304962), mRNA [XM_222871]		FALSE
A_42_P692054	0.0176191	0.000279997	-0.974064	-0.13119	0.627116	-0.470684	-0.83806	AF112455	Nfia	Rattus norvegicus nuclear factor I-A2 (NFIA) mRNA, complete cds. [AF112455]	AF112455	FALSE
A_44_P701038	0.0389354	0.00137284	0.581917	-0.0671685	-0.0375503	-0.0997355	-0.35408	TC628641	TC628641	Q9EST8_MOUSE (Q9EST8) MAIL (IL-1 inducible nuclear ankyrin-repeat protein) (7 days embryo whole body cDNA, RIKEN full-length enriched library, clone:C430015N24 product:MAIL (IL-1 inducible nuclear ankyrin-repeat protein) (Molecule possessing...		FALSE
A_44_P318846	0.0165497	0.000253288	-0.208761	-0.169474	-0.222755	0.0917972	1.1045	ENSRNOT00000016302	Prmt5_predicted	PREDICTED: Rattus norvegicus protein arginine N-methyltransferase 5 (predicted) (Prmt5_predicted), mRNA [XM_344405]		FALSE
A_42_P671125	0.0452185	0.00200579	-0.00741518	0.0451975	0.215848	0.261728	0.774351	ENSRNOT00000029996	Trim28	Transcription intermediary factor 1-beta (TIF1-beta) (Tripartite motif-containing protein 28) (Nuclear corepressor KAP-1) (KRAB- associated protein 1) (Fragment). [Source:Uniprot/SWISSPROT;Acc:O08629] [ENSRNOT00000029996]		FALSE
A_44_P409696	0.014606	0.000199262	-0.177608	-0.189185	-0.11958	0.0361127	0.740224	NM_012639	Raf1	Rattus norvegicus v-raf-1 murine leukemia viral oncogene homolog 1 (Raf1), mRNA [NM_012639]	NM_012639	FALSE
A_44_P885558	0.0388979	0.00135796	-1.95649	0.825209	0.263424	-0.283526	-0.832423	TC597670	TC597670	Q8R4C3_CRIGR (Q8R4C3) Csr1, partial (40%) [TC597670]		FALSE
A_43_P18795	0.0223543	0.000435985	-0.294493	-0.384184	-0.448499	-0.0392538	0.62743	NM_001047849	Agpat6	Rattus norvegicus 1-acylglycerol-3-phosphate O-acyltransferase 6 (lysophosphatidic acid acyltransferase, zeta) (Agpat6), mRNA [NM_001047849]	NM_001047849	FALSE
A_44_P276317	0.0472426	0.00223309	-0.0117377	-0.41714	-0.10928	0.631683	1.2207	NM_012704	Ptger3	Rattus norvegicus prostaglandin E receptor 3 (subtype EP3) (Ptger3), mRNA [NM_012704]	NM_012704	FALSE
A_44_P443228	0.0419303	0.00165451	0.14706	0.097244	0.100245	0.479997	1.16839	ENSRNOT00000024328	Fech_predicted	Rattus norvegicus similar to ferrochelatase (LOC361338), mRNA [XM_341622]		FALSE
A_44_P449215	0.0358995	0.00117912	-1.10367	-0.812553	0.0701489	-0.72531	-0.410238	AW251678	AW251678	AW251678 UI-R-BJ0-adp-f-03-0-UI.s1 UI-R-BJ0 Rattus norvegicus cDNA clone UI-R-BJ0-adp-f-03-0-UI 3', mRNA sequence [AW251678]	AW251678	FALSE
A_44_P652332	0.0452888	0.00202801	-0.131843	-0.316899	-0.383552	0.340527	1.05409	NM_001025023	LOC362557	Rattus norvegicus hypothetical protein LOC362557 (LOC362557), mRNA [NM_001025023]	NM_001025023	FALSE
A_44_P445724	0.0478307	0.00233045	0.339382	-0.3629	-0.187144	0.244169	0.653786	XR_006176	LOC297809	PREDICTED: Rattus norvegicus similar to Glyceraldehyde-3-phosphate dehydrogenase (GAPDH) (LOC297809), mRNA [XR_006176]	XR_006176	FALSE
A_43_P11430	0.0057074	3.11107e-05	-0.593622	-0.315974	0.0488704	0.239922	0.674186	ENSRNOT00000025193	Adsl_predicted	PREDICTED: Rattus norvegicus adenylosuccinate lyase (predicted) (Adsl_predicted), mRNA [XM_235496]		FALSE
A_43_P17903	0.0340844	0.00102609	-0.147382	-0.221681	-0.132499	-0.43392	-0.612605	ENSRNOT00000024953	RGD1311084_predicted	Rattus norvegicus similar to 1700113K14Rik protein (LOC311852), mRNA [XM_231131]		FALSE
A_44_P192382	0.00857898	6.85298e-05	-0.680765	-0.626975	-0.456841	-0.383584	0.492808	NM_001014113	Utp14a	Rattus norvegicus UTP14, U3 small nucleolar ribonucleoprotein, homolog A (yeast) (Utp14a), mRNA [NM_001014113]	NM_001014113	FALSE
A_44_P466417	0.0356172	0.00113267	0.163566	1.20846	2.21021	1.03455	0.3649	NM_001047086	Irf2_predicted	Rattus norvegicus interferon regulatory factor 2 (predicted) (Irf2_predicted), mRNA [NM_001047086]	NM_001047086	FALSE
A_44_P929478	0.014606	0.000197011	-0.790266	-0.232871	0.170863	0.0350169	0.475695	TC624775	TC624775	Q6QI92_RAT (Q6QI92) LRRG00116, partial (30%) [TC624775]		FALSE
A_44_P745710	0.017077	0.000269839	0.260008	-0.108246	0.277733	-0.0527278	-0.0981037	CF106934	CF106934	Shultzomica00185 Rat lung airway and parenchyma cDNA libraries Rattus norvegicus cDNA clone Contig3387 5', mRNA sequence [CF106934]	CF106934	FALSE
A_44_P328864	0.0422658	0.00170399	-0.43364	-0.454265	-0.231388	0.188203	0.668024	ENSRNOT00000038162	ENSRNOT00000038162	PREDICTED: Rattus norvegicus RAN binding protein 1 (predicted) (Ranbp1_predicted), mRNA [XM_341011]		FALSE
A_44_P972824	0.0410936	0.0015585	-0.545398	-0.816392	-0.736483	-0.0217586	0.400966	NM_053655	Dnm1l	Rattus norvegicus dynamin 1-like (Dnm1l), mRNA [NM_053655]	NM_053655	FALSE
A_43_P21223	0.0118963	0.000128091	-0.161013	-0.124554	-0.315165	0.432338	1.31743	NM_001012014	Ftsj3	Rattus norvegicus FtsJ homolog 3 (E. coli) (Ftsj3), mRNA [NM_001012014]	NM_001012014	FALSE
A_44_P104069	0.00324596	8.67064e-06	-0.283067	-0.221492	0.595015	0.645038	0.879644	ENSRNOT00000005688	Nola2_predicted	PREDICTED: Rattus norvegicus nucleolar protein family A, member 2 (predicted) (Nola2_predicted), mRNA [XM_213293]		FALSE
A_44_P424481	0.042535	0.00173328	-0.138242	-0.0431305	0.199728	0.185144	0.912183	ENSRNOT00000008940	Rcc2_predicted	Rattus norvegicus similar to CG9135-PA (LOC298594), mRNA [XM_216557]		FALSE
A_44_P1025386	0.0308626	0.000859693	-0.0609949	-0.251957	-0.333652	-0.843776	-0.981149	BF564217	BF564217	BF564217 UI-R-C4-alk-b-02-0-UI.r1 UI-R-C4 Rattus norvegicus cDNA clone UI-R-C4-alk-b-02-0-UI 5', mRNA sequence [BF564217]	BF564217	FALSE
A_44_P132464	0.0453721	0.00203855	-1.90943	-1.38923	-0.612031	-1.77141	-1.98551	BM986266	BM986266	BM986266 EST531720 Rat gene index, normalized rat, norvegicus Rattus norvegicus cDNA clone RGIAD25 3' end similar to clusterin, mRNA sequence [BM986266]	BM986266	FALSE
A_44_P1044878	0.0473723	0.00224879	-0.33769	0.465615	1.25352	0.391494	0.101108	ENSRNOT00000025878	Ap3d1	Ap3d1 protein (Fragment). [Source:Uniprot/SPTREMBL;Acc:Q5RK16] [ENSRNOT00000025878]		FALSE
A_44_P361465	0.0147851	0.000206925	-0.0813868	-0.0551929	-0.221309	-1.02745	-1.17905	ENSRNOT00000055805	RGD1564322_predicted	PREDICTED: Rattus norvegicus similar to shippo 1 (predicted) (RGD1564322_predicted), mRNA [XM_576327]		FALSE
A_44_P737376	0.0260625	0.000590432	0.495103	0.185865	0.208963	0.526066	1.73452	CV076506	CV076506	AGENCOURT_31479076 NIH_MGC_251 Rattus norvegicus cDNA clone IMAGE:7385236 5', mRNA sequence [CV076506]	CV076506	FALSE
A_44_P456599	0.00573863	3.244e-05	-0.598757	-0.430598	0.213315	0.487991	1.09379	NM_213627	Zdhhc23	Rattus norvegicus zinc finger, DHHC domain containing 23 (Zdhhc23), mRNA [NM_213627]	NM_213627	FALSE
A_44_P988451	0.0410936	0.00156582	-0.0685711	-0.174074	-0.105977	-0.101535	0.744093	ENSRNOT00000059715	RGD1566119_predicted	PREDICTED: Rattus norvegicus similar to Histone H2A.x (H2a/x) (predicted) (RGD1566119_predicted), mRNA [XM_576399]		FALSE
A_44_P233907	0.0251273	0.000554454	0.166242	0.208726	0.0865365	-0.407558	-0.799874	ENSRNOT00000042906	ENSRNOT00000042906	Histone H4 [Contains: Osteogenic growth peptide (OGP)]. [Source:Uniprot/SWISSPROT;Acc:P62804] [ENSRNOT00000042906]		FALSE
A_44_P192964	0.0232645	0.000481228	-0.665089	-0.592746	0.0625008	-0.948486	-1.01705	NM_001013994	Rcor2	Rattus norvegicus REST corepressor 2 (Rcor2), mRNA [NM_001013994]	NM_001013994	FALSE
A_44_P297420	0.0162196	0.000243843	-0.0879084	-0.7612	-0.963543	-0.804522	-0.466127	ENSRNOT00000028007	RGD1559927_predicted	Rattus norvegicus similar to homeodomain protein (LOC293537), mRNA [XM_219327]		FALSE
A_44_P411139	0.0472571	0.00223591	-1.13765	-0.860166	-0.265808	-0.805142	-0.819095	BQ193604	BQ193604	BQ193604 UI-R-CN1-clw-e-04-0-UI.s1 UI-R-CN1 Rattus norvegicus cDNA clone UI-R-CN1-clw-e-04-0-UI 3', mRNA sequence [BQ193604]	BQ193604	FALSE
A_44_P236393	0.0297309	0.000806831	-0.243755	-0.309366	-0.349054	-0.0703188	0.637557	ENSRNOT00000016347	RGD1305605_predicted	PREDICTED: Rattus norvegicus similar to 2610033H07Rik protein (predicted) (RGD1305605_predicted), mRNA [XM_214059]		FALSE
A_44_P715389	0.0441691	0.00189007	0.19676	-0.0694337	0.0419267	0.328045	0.822149	NM_001014034	Qrsl1	Rattus norvegicus glutaminyl-tRNA synthase (glutamine-hydrolyzing)-like 1 (Qrsl1), mRNA [NM_001014034]	NM_001014034	FALSE
A_44_P166418	0.0401338	0.00148718	0.258466	-0.153698	-0.406932	-0.467347	-0.0397462	ENSRNOT00000027564	RGD1310271_predicted	PREDICTED: Rattus norvegicus similar to hypothetical protein MGC45873 (predicted) (RGD1310271_predicted), mRNA [XM_233727]		FALSE
A_44_P466255	0.0304432	0.000843887	0.127208	-0.192105	-0.39705	0.774713	1.1491	XM_001074661	LOC690517	PREDICTED: Rattus norvegicus similar to Ornithine decarboxylase (ODC) (LOC690517), mRNA [XM_001074661]	XM_001074661	FALSE
A_44_P222954	0.0078729	5.47371e-05	-0.338056	-0.60222	-0.00838959	0.509813	0.983814	A_44_P222954	A_44_P222954			FALSE
A_44_P121347	0.0354182	0.00111132	-0.201778	-0.193647	-1.06596	-1.28999	-2.05835	NM_001009663	Serpina6	Rattus norvegicus serine (or cysteine) proteinase inhibitor, clade A (alpha-1 antiproteinase, antitrypsin), member 6 (Serpina6), mRNA [NM_001009663]	NM_001009663	FALSE
A_44_P516789	0.0122475	0.000138234	-0.796934	-0.570813	0.0969797	-0.69175	-0.860304	BE120498	BE120498	BE120498 UI-R-CA0-bat-b-08-0-UI.s1 UI-R-CA0 Rattus norvegicus cDNA clone UI-R-CA0-bat-b-08-0-UI 3', mRNA sequence [BE120498]	BE120498	FALSE
A_44_P330170	0.0478307	0.00233564	0.144411	-0.204712	-0.651349	0.401751	1.11714	NM_053655	Dnm1l	Rattus norvegicus dynamin 1-like (Dnm1l), mRNA [NM_053655]	NM_053655	FALSE
A_44_P166018	0.0057074	3.00218e-05	-0.16799	-0.0901535	0.644388	0.690304	0.884236	ENSRNOT00000055153	ENSRNOT00000055153	similar to nucleolar protein family A, member 2 (LOC365348), mRNA [Source:RefSeq_dna;Acc:XR_009159] [ENSRNOT00000055153]		FALSE
A_44_P512828	0.0401386	0.0014994	-0.584934	-0.770531	0.0248216	-0.212524	0.028116	NM_053322	Pom210	Rattus norvegicus nuclear pore membrane glycoprotein 210 (Pom210), mRNA [NM_053322]	NM_053322	FALSE
A_44_P428535	0.0452185	0.00200234	0.600935	-0.0223638	-0.178495	-0.0876944	-0.131674	NM_001000263	Olr384_predicted	Rattus norvegicus olfactory receptor 384 (predicted) (Olr384_predicted), mRNA [NM_001000263]	NM_001000263	FALSE
A_42_P695669	0.0413288	0.00158647	-0.295455	-0.371875	0.0892485	0.198158	0.759954	AW915538	AW915538	EST346842 Normalized rat embryo, Bento Soares Rattus sp. cDNA clone RGICW51 5' end, mRNA sequence [AW915538]	AW915538	FALSE
A_44_P728923	0.0457173	0.00207018	0.380962	0.0726728	0.0374972	0.00857365	-0.141353	A_44_P728923	A_44_P728923			FALSE
A_44_P852338	0.0438944	0.00183481	-0.361153	-0.275011	0.372554	0.323402	0.376411	ENSRNOT00000051343	RGD1563145_predicted	PREDICTED: Rattus norvegicus similar to 60S ribosomal protein L13 (predicted) (RGD1563145_predicted), mRNA [XM_575281]		FALSE
A_44_P133344	0.00723428	4.56982e-05	0.106999	0.0442333	-0.347964	0.446469	0.813713	NM_001014153	RGD1304869_predicted	Rattus norvegicus similar to arginine N-methyltransferase p82 isoform (predicted) (RGD1304869_predicted), mRNA [NM_001014153]	NM_001014153	FALSE
A_44_P496013	0.0057074	2.98461e-05	-0.0104909	-0.0708185	0.0833847	0.256807	0.798744	CV119657	CV119657	AGENCOURT_31539770 NIH_MGC_270 Rattus norvegicus cDNA clone IMAGE:7445129 5', mRNA sequence [CV119657]	CV119657	FALSE
A_44_P408577	0.0462822	0.00212292	0.394542	0.236294	-0.406076	0.243537	0.00301194	AI228129	AI228129	AI228129 EST224824 Normalized rat brain, Bento Soares Rattus sp. cDNA clone RBRCQ67 3' end, mRNA sequence [AI228129]	AI228129	FALSE
A_44_P400591	0.00759224	5.01228e-05	-0.0583998	-0.298902	0.143482	0.990352	1.49915	A_44_P400591	A_44_P400591			FALSE
A_44_P365286	0.0142347	0.000186012	-0.632748	-0.666133	0.239956	0.604953	0.62109	NM_022407	Aldh1a1	Rattus norvegicus aldehyde dehydrogenase family 1, member A1 (Aldh1a1), mRNA [NM_022407]	NM_022407	FALSE
A_44_P528552	0.044714	0.00194735	0.429774	-0.129966	-0.465314	-0.425951	-0.257222	ENSRNOT00000052003	Tyki_predicted	PREDICTED: Rattus norvegicus thymidylate kinase family LPS-inducible member (predicted) (Tyki_predicted), mRNA [XM_234017]		FALSE
A_43_P12417	0.0469043	0.00219982	0.234353	-0.227584	-0.456313	0.16029	0.930521	NM_024351	Hspa8	Rattus norvegicus heat shock protein 8 (Hspa8), mRNA [NM_024351]	NM_024351	FALSE
A_44_P1032752	0.00305205	7.57844e-06	0.111078	-0.146773	0.861052	0.979861	1.0908	NM_001015008	Tcea3	Rattus norvegicus transcription elongation factor A (SII), 3 (Tcea3), mRNA [NM_001015008]	NM_001015008	FALSE
A_44_P227010	0.0421933	0.00169535	0.473185	0.194452	0.105337	-0.0377882	-0.582465	ENSRNOT00000032439	RGD1306181_predicted	PREDICTED: Rattus norvegicus similar to A630041N19 protein (predicted) (RGD1306181_predicted), mRNA [XM_218223]		FALSE
A_44_P994492	0.034469	0.00106266	0.0362593	-0.174631	-0.00275338	0.411271	0.904625	NM_022297	Ddah1	Rattus norvegicus dimethylarginine dimethylaminohydrolase 1 (Ddah1), mRNA [NM_022297]	NM_022297	FALSE
A_44_P215393	0.0222621	0.000430166	-0.352667	0.566979	1.11989	0.404136	0.163487	NM_001025129	RGD1306327	Rattus norvegicus similar to downregulated in renal cell carcinoma (RGD1306327), mRNA [NM_001025129]	NM_001025129	FALSE
A_44_P391814	0.0419303	0.00164029	0.167827	0.0831301	-0.549645	0.315992	0.954316	BC083906	Tmem69	Rattus norvegicus transmembrane protein 69, mRNA (cDNA clone IMAGE:7133962). [BC083906]	BC083906	FALSE
A_44_P920467	0.0378407	0.00130936	-0.510696	-0.167053	0.335076	-0.122509	-0.22364	AI177911	AI177911	AI177911 EST221562 Normalized rat placenta, Bento Soares Rattus sp. cDNA clone RPLCI41 3' end, mRNA sequence [AI177911]	AI177911	FALSE
A_44_P429453	0.0321741	0.000932541	0.738176	0.860874	0.612015	-0.127507	-0.530239	ENSRNOT00000008981	Lama5	Laminin chain (Fragment). [Source:Uniprot/SPTREMBL;Acc:P70636] [ENSRNOT00000008981]		FALSE
A_44_P260099	0.026641	0.000623047	-0.0873548	-0.190375	0.280858	0.337459	0.853539	NM_139252	Ppap2c	Rattus norvegicus phosphatidic acid phosphatase type 2c (Ppap2c), mRNA [NM_139252]	NM_139252	FALSE
A_44_P1036170	0.0212391	0.000395057	-0.386819	-0.312475	-0.0787073	-0.0812212	0.778574	XM_220770	Nle1_predicted	PREDICTED: Rattus norvegicus notchless homolog 1 (Drosophila) (predicted) (Nle1_predicted), mRNA [XM_220770]	XM_220770	FALSE
A_44_P136707	0.0318442	0.000914643	-0.185138	-0.0905	0.163084	0.465601	0.548269	BG664788	BG664788	BG664788 DRABLB11 Rat DRG Library Rattus norvegicus cDNA clone DRABLB11 5', mRNA sequence [BG664788]	BG664788	FALSE
A_44_P776390	0.00204058	3.68672e-06	-0.301468	-0.0428324	0.328817	-0.85701	-1.18391	NM_001039516	LOC364241	Rattus norvegicus similar to potassium channel TASK2 (LOC364241), mRNA [NM_001039516]	NM_001039516	FALSE
A_43_P12767	0.0334534	0.000995294	-0.185598	0.344327	0.832318	0.0489715	-0.14555	NM_053326	Pdlim5	Rattus norvegicus PDZ and LIM domain 5 (Pdlim5), mRNA [NM_053326]	NM_053326	FALSE
A_42_P535555	0.0398873	0.00146913	-0.234161	-0.0581157	0.0615824	-0.0352987	0.609869	ENSRNOT00000033307	Papd5_predicted	PREDICTED: Rattus norvegicus PAP associated domain containing 5 (predicted) (Papd5_predicted), mRNA [XM_226334]		FALSE
A_44_P518050	0.0301373	0.000829966	0.013117	0.114551	0.187477	0.273606	0.572374	ENSRNOT00000008355	Sf3a1_predicted	PREDICTED: Rattus norvegicus splicing factor 3a, subunit 1 (predicted) (Sf3a1_predicted), mRNA [XM_223566]		FALSE
A_44_P340448	0.0129177	0.000153263	-0.474461	-0.222973	-0.215767	0.0624814	0.392087	NM_001024790	Usp7	Rattus norvegicus ubiquitin specific protease 7 (herpes virus-associated) (Usp7), mRNA [NM_001024790]	NM_001024790	FALSE
A_44_P432358	0.002254	4.37572e-06	-1.03523	-0.694184	0.340576	1.30659	2.19249	NM_057105	Ugt1a6	Rattus norvegicus UDP glycosyltransferase 1 family, polypeptide A6 (Ugt1a6), transcript variant 2, mRNA [NM_057105]	NM_057105	FALSE
A_44_P438346	0.00941282	8.10113e-05	0.930352	0.491873	0.228798	0.541181	2.38049	NM_001009965	Eiih	Rattus norvegicus hepatic protein EIIH (Eiih), mRNA [NM_001009965]	NM_001009965	FALSE
A_44_P606810	0.0129925	0.000158272	-0.0383109	-0.27503	0.249765	0.416215	0.992684	TC593084	TC593084	Q52UW0_9BACT (Q52UW0) Formyltransferase/hydrolase complex subunit D (Fragment), partial (7%) [TC593084]		FALSE
A_44_P451568	0.0340954	0.00103157	-0.0647541	0.494288	1.46047	0.178957	-0.0620487	NM_173101	Myo1e	Rattus norvegicus myosin IE (Myo1e), mRNA [NM_173101]	NM_173101	FALSE
A_44_P575890	0.042535	0.00173578	-0.0513316	0.207499	0.641587	0.399394	0.810131	TC602730	TC602730	Q7TQ12_RAT (Q7TQ12) Aa1114, partial (9%) [TC602730]		FALSE
A_44_P466111	0.0438383	0.00182676	-0.232694	0.295909	0.798292	0.27469	0.322045	AB012231	Nfib	Rattus norvegicus mRNA for NF1-B2, complete cds. [AB012231]	AB012231	FALSE
A_43_P23463	0.0446741	0.0019342	-0.402496	0.090112	0.255259	-0.415672	-0.655339	XM_343611	XM_343611	Rattus norvegicus similar to Nuclear autoantigen Sp-100 (Speckled 100 kDa) (Nuclear dot-associated Sp100 protein) (LOC363269), mRNA [XM_343611]	XM_343611	FALSE
A_42_P519868	0.00203963	2.69767e-06	-0.108351	-0.0562637	0.558267	0.807993	1.34782	NM_053906	Gsr	Rattus norvegicus glutathione reductase (Gsr), mRNA [NM_053906]	NM_053906	FALSE
A_44_P1020134	0.0269159	0.000639957	0.494306	0.275392	0.263797	0.66878	1.41332	NM_001025036	LOC499339	Rattus norvegicus hypothetical protein LOC499339 (LOC499339), mRNA [NM_001025036]	NM_001025036	FALSE
A_44_P175376	0.0419222	0.00162957	0.364932	0.232953	-0.378682	-0.188024	-0.610319	NM_001011975	Aldh1b1	Rattus norvegicus aldehyde dehydrogenase 1 family, member B1 (Aldh1b1), mRNA [NM_001011975]	NM_001011975	FALSE
A_42_P772157	0.040487	0.00152078	-0.345919	-0.211388	0.446514	-0.614764	-0.667374	NM_017020	Il6ra	Rattus norvegicus interleukin 6 receptor, alpha (Il6ra), mRNA [NM_017020]	NM_017020	FALSE
A_44_P529581	0.00204058	3.77715e-06	-0.183778	0.188869	0.339564	0.575074	1.40197	NM_138504	Okl38	Rattus norvegicus pregnancy-induced growth inhibitor (Okl38), mRNA [NM_138504]	NM_138504	FALSE
A_44_P484525	0.0452092	0.00199275	-1.02443	-0.528881	0.069924	-0.846115	-1.01945	AA924218	AA924218	AA924218 UI-R-A1-dx-b-11-0-UI.s1 UI-R-A1 Rattus norvegicus cDNA clone UI-R-A1-dx-b-11-0-UI 3' similar to gi [AA924218]	AA924218	FALSE
A_44_P941132	0.0209905	0.000380145	-0.286475	-0.507878	-0.23583	0.0944229	0.908498	ENSRNOT00000030569	Chordc1_predicted	PREDICTED: Rattus norvegicus cysteine and histidine-rich domain (CHORD)-containing, zinc-binding protein 1 (predicted) (Chordc1_predicted), mRNA [XM_235878]		FALSE
A_44_P1024788	0.00853127	6.62473e-05	-0.312539	-0.307436	0.169083	0.169673	0.779799	NM_001025143	LOC498606	Rattus norvegicus hypothetical protein LOC498606 (LOC498606), mRNA [NM_001025143]	NM_001025143	FALSE
A_44_P210563	0.0441691	0.00188024	0.1626	-0.0417982	-0.39055	-0.976523	-1.01605	NM_012578	H1f0	Rattus norvegicus H1 histone family, member 0 (H1f0), mRNA [NM_012578]	NM_012578	FALSE
A_44_P161790	0.0184911	0.000308046	0.159745	0.117576	-0.0945256	0.532972	0.886101	ENSRNOT00000028288	Tmem103_predicted	PREDICTED: Rattus norvegicus transmembrane protein 103 (predicted) (Tmem103_predicted), mRNA [XM_343489]		FALSE
A_44_P204173	0.0378407	0.0013065	-0.068216	-0.120364	-0.0642325	0.100024	0.853218	A_44_P204173	A_44_P204173			FALSE
A_44_P435822	0.0137468	0.000172881	-0.378189	-0.22944	0.0496023	0.389369	0.802326	NM_001047892	LOC317165	Rattus norvegicus similar to Set alpha isoform (LOC317165), mRNA [NM_001047892]	NM_001047892	FALSE
A_42_P658562	0.0297309	0.000805861	-0.172889	-0.228927	-0.138545	0.291473	0.435707	ENSRNOT00000016980	RGD1304711_predicted	PREDICTED: Rattus norvegicus similar to RIKEN cDNA 4921521J11 (predicted) (RGD1304711_predicted), mRNA [XM_214334]		FALSE
A_44_P329389	0.0389354	0.00136874	0.0611143	-0.0844995	0.0725256	0.318787	0.915031	DY472907	DY472907	RVL24274 Wackym-Soares normalized rat vestibular cDNA library Rattus norvegicus cDNA 5', mRNA sequence [DY472907]	DY472907	FALSE
A_44_P175719	0.044714	0.001944	0.397699	0.0686834	0.160298	0.110192	-0.0173612	ENSRNOT00000016431	Bpil1_predicted	PREDICTED: Rattus norvegicus bactericidal [XM_215892]		FALSE
A_44_P557273	0.0478307	0.00230991	0.0429606	0.0765543	0.210576	0.448277	-0.434522	NM_001000793	Olr1316_predicted	Rattus norvegicus olfactory receptor 1316 (predicted) (Olr1316_predicted), mRNA [NM_001000793]	NM_001000793	FALSE
A_44_P1034849	0.0410936	0.00156165	-0.625968	-0.226353	0.393634	-0.431809	-0.551867	AA859994	AA859994	UI-R-E0-ca-b-02-0-UI.s1 UI-R-E0 Rattus norvegicus cDNA clone UI-R-E0-ca-b-02-0-UI 3' similar to gb [AA859994]	AA859994	FALSE
A_43_P13342	0.00759224	4.97788e-05	-0.544733	-0.34472	-0.287291	0.622941	1.26947	NM_138974	Gstp2	Rattus norvegicus glutathione S-transferase, pi 2 (Gstp2), mRNA [NM_138974]	NM_138974	FALSE
A_44_P511101	0.0222621	0.000425327	0.326317	0.235484	0.340099	0.794697	1.54331	XM_341573	RGD1560916_predicted	PREDICTED: Rattus norvegicus similar to FUN14 domain containing 2 (predicted) (RGD1560916_predicted), mRNA [XM_341573]	XM_341573	FALSE
A_44_P126092	0.00464694	1.82506e-05	0.0420676	0.0212984	0.0524216	0.578589	1.21273	NM_001025405	Ruvbl2	Rattus norvegicus RuvB-like 2 (E. coli) (Ruvbl2), mRNA [NM_001025405]	NM_001025405	FALSE
A_44_P623001	0.0129925	0.000156161	-0.440519	-0.253187	0.55259	-0.0679103	0.0448196	TC593314	TC593314			FALSE
A_44_P504374	0.0149957	0.000212581	-0.219444	-0.357048	-0.37309	0.0362872	0.762376	ENSRNOT00000004097	RGD1311526_predicted	PREDICTED: Rattus norvegicus similar to RIKEN cDNA 5630401D24 (predicted) (RGD1311526_predicted), mRNA [XM_213927]		FALSE
A_43_P10161	0.0393392	0.00142793	-0.625652	-0.549013	-0.172678	-0.0905994	-0.0986187	XM_213920	Kifap3_predicted	PREDICTED: Rattus norvegicus kinesin-associated protein 3 (predicted) (Kifap3_predicted), mRNA [XM_213920]	XM_213920	FALSE
A_43_P12247	0.0102515	9.32815e-05	-0.171681	-0.131291	0.613613	0.655475	0.818029	NM_022547	Fthfd	Rattus norvegicus formyltetrahydrofolate dehydrogenase (Fthfd), mRNA [NM_022547]	NM_022547	FALSE
A_44_P560176	0.0327503	0.000962549	0.634111	0.383479	-0.184316	0.324628	-0.122998	A_44_P560176	A_44_P560176			FALSE
A_44_P403005	0.029016	0.000764759	-0.915191	-0.588197	-0.311934	-0.117218	0.321808	NM_001012173	Trub1	Rattus norvegicus TruB pseudouridine (psi) synthase homolog 1 (E. coli) (Trub1), mRNA [NM_001012173]	NM_001012173	FALSE
A_44_P466271	0.0287896	0.000753857	-0.357221	-0.164621	0.319185	0.0421473	0.314894	NM_001012066	Sphk2	Rattus norvegicus sphingosine kinase 2 (Sphk2), mRNA [NM_001012066]	NM_001012066	FALSE
A_43_P12007	0.00344874	1.0595e-05	-0.370483	-0.244542	0.0319363	0.620027	1.29068	NM_019283	Slc3a2	Rattus norvegicus solute carrier family 3 (activators of dibasic and neutral amino acid transport), member 2 (Slc3a2), mRNA [NM_019283]	NM_019283	FALSE
A_44_P250319	0.0341839	0.00104018	-0.786701	-0.217342	0.329146	-0.2341	-0.247159	ENSRNOT00000031045	Npepps	Npepps protein (Fragment). [Source:Uniprot/SPTREMBL;Acc:Q3B8Q9] [ENSRNOT00000031045]		FALSE
A_44_P704817	0.0466056	0.00216511	-1.38352	-0.823206	-0.196449	-0.686249	-0.797928	A_44_P704817	A_44_P704817			FALSE
A_44_P288467	0.0297309	0.000809379	-0.401289	0.156996	0.220415	0.419911	0.701401	ENSRNOT00000018905	ENSRNOT00000018905	PREDICTED: Rattus norvegicus similar to outer dense fiber of sperm tails 2-like (LOC685425), mRNA [XM_001063750]		FALSE
A_44_P128110	0.0295873	0.00079817	0.338792	-0.1007	-0.624785	-0.351745	0.131344	NR_002156	AA926063	Rattus norvegicus AA926063gene (AA926063) on chromosome 20 [NR_002156]	NR_002156	FALSE
A_44_P330168	0.0355173	0.00111835	0.020898	-0.322707	-0.552669	0.225659	0.952265	NM_053655	Dnm1l	Rattus norvegicus dynamin 1-like (Dnm1l), mRNA [NM_053655]	NM_053655	FALSE
A_44_P329944	0.0421885	0.00169325	-1.19634	-0.43109	0.119237	-0.522018	-0.590345	AA945177	AA945177	AA945177 EST200676 Normalized rat liver, Bento Soares Rattus sp. cDNA clone RLIAH53 3' end, mRNA sequence [AA945177]	AA945177	FALSE
A_44_P192543	0.049098	0.00246165	-0.637993	-0.513043	-0.197466	0.071576	0.346067	NM_001013105	Fkbp11	Rattus norvegicus FK506 binding protein 11 (Fkbp11), mRNA [NM_001013105]	NM_001013105	FALSE
A_44_P586876	0.00609637	3.57801e-05	-0.695221	-0.866753	-0.709754	-0.191141	0.376099	XM_001058055	LOC681708	PREDICTED: Rattus norvegicus similar to transmembrane protein 41a (LOC681708), mRNA [XM_001058055]	XM_001058055	FALSE
A_42_P552233	0.0204984	0.000362771	-0.755322	-0.890092	-0.418959	0.158688	0.515277	XM_213765	XM_213765	Rattus norvegicus similar to CCT (chaperonin containing TCP-1) zeta subunit (LOC288620), mRNA [XM_213765]	XM_213765	FALSE
A_44_P807660	0.0422389	0.001701	-0.721101	0.172238	0.744732	-0.232332	-0.159024	XM_234546	Rcor1_predicted	PREDICTED: Rattus norvegicus REST corepressor 1 (predicted) (Rcor1_predicted), mRNA [XM_234546]	XM_234546	FALSE
A_44_P367767	0.0137468	0.000173628	-0.362762	-0.153805	0.475349	0.570731	0.754538	NM_001029903	LOC360721	Rattus norvegicus growth and transformation-dependent protein (LOC360721), mRNA [NM_001029903]	NM_001029903	FALSE
A_44_P842474	0.0102544	9.44422e-05	0.376967	0.404445	0.347451	-0.734715	-1.21913	TC605649	TC605649			FALSE
A_44_P282794	0.048762	0.002437	-0.287898	0.038224	0.675361	-0.0737449	-0.361063	XM_218790	Chd2_predicted	PREDICTED: Rattus norvegicus chromodomain helicase DNA binding protein 2 (predicted) (Chd2_predicted), mRNA [XM_218790]	XM_218790	FALSE
A_44_P486477	0.033039	0.000975507	-1.18137	-0.291873	0.727205	-0.17976	-1.11907	AA818699	AA818699	AA818699 UI-R-A0-az-c-05-0-UI.s1 UI-R-A0 Rattus norvegicus cDNA clone UI-R-A0-az-c-05-0-UI 3' similar to gb [AA818699]	AA818699	FALSE
A_44_P460456	0.0376876	0.00129652	0.169586	0.0367734	-0.0942041	0.168252	0.773015	NM_001033708	Rae1	Rattus norvegicus RAE1 RNA export 1 homolog (S. pombe) (Rae1), mRNA [NM_001033708]	NM_001033708	FALSE
A_44_P156364	0.0269159	0.000640391	-1.38635	0.923226	0.695206	1.20199	1.18457	NM_001000458	Olr1273_predicted	Rattus norvegicus olfactory receptor 1273 (predicted) (Olr1273_predicted), mRNA [NM_001000458]	NM_001000458	FALSE
A_44_P992780	0.0478152	0.00229038	-0.145187	-0.890127	-1.0673	-0.111633	0.726	NM_001024743	Ugp2	Rattus norvegicus UDP-glucose pyrophosphorylase 2 (Ugp2), mRNA [NM_001024743]	NM_001024743	FALSE
A_43_P11307	0.0459752	0.00209431	-0.847589	-0.753654	-0.27835	-0.341015	0.0778856	ENSRNOT00000027173	Impdh1_predicted	PREDICTED: Rattus norvegicus IMP (inosine monophosphate) dehydrogenase 1 (predicted) (Impdh1_predicted), mRNA [XM_342650]		FALSE
A_44_P506635	0.00234884	4.984e-06	-0.149168	-0.146026	0.311052	0.314843	1.03882	NM_001047871	Ifrd2_predicted	Rattus norvegicus interferon-related developmental regulator 2 (predicted) (Ifrd2_predicted), mRNA [NM_001047871]	NM_001047871	FALSE
A_44_P1025476	0.029016	0.000766586	-0.437687	-0.338891	-0.0427866	0.356471	0.572315	NM_053976	Krt1-18	Rattus norvegicus keratin complex 1, acidic, gene 18 (Krt1-18), mRNA [NM_053976]	NM_053976	FALSE
A_44_P790750	0.0221117	0.000416293	0.358719	-0.127673	-0.123091	1.02072	1.31465	XR_006810	LOC364646	PREDICTED: Rattus norvegicus similar to chaperonin containing TCP1, subunit 6A isoform a (LOC364646), mRNA [XR_006810]	XR_006810	FALSE
A_44_P367499	0.0208757	0.000375743	-0.0847006	-0.0919259	0.167756	0.266967	0.873441	NM_053776	Dnajc2	Rattus norvegicus DnaJ (Hsp40) homolog, subfamily C, member 2 (Dnajc2), mRNA [NM_053776]	NM_053776	FALSE
A_44_P516745	0.0419303	0.00164406	-0.27163	-0.0652559	0.27969	0.00724673	0.578215	NM_012489	Acaa1	Rattus norvegicus acetyl-Coenzyme A acyltransferase 1 (Acaa1), mRNA [NM_012489]	NM_012489	FALSE
A_44_P412290	0.0380599	0.00132136	0.320658	-1.00728	-1.81018	-1.29949	-0.752531	NM_001008524	C1qg	Rattus norvegicus complement component 1, q subcomponent, gamma polypeptide (C1qg), mRNA [NM_001008524]	NM_001008524	FALSE
A_44_P807109	0.00116752	8.43353e-07	0.0580424	0.0167651	0.546936	1.33099	2.47958	DV726956	DV726956	RVL19364 Wackym-Soares normalized rat vestibular cDNA library Rattus norvegicus cDNA 5', mRNA sequence [DV726956]	DV726956	FALSE
A_44_P518385	0.0290924	0.00077359	-0.248954	0.0136313	0.251916	0.268575	0.864091	NM_001025696	Yars	Rattus norvegicus tyrosyl-tRNA synthetase (Yars), mRNA [NM_001025696]	NM_001025696	FALSE
A_42_P799494	0.0323775	0.000941361	0.827785	0.18897	-0.263908	0.677377	1.83849	ENSRNOT00000036258	Htatip2_predicted	PREDICTED: Rattus norvegicus HIV-1 tat interactive protein 2, homolog (human) (predicted) (Htatip2_predicted), mRNA [XM_214927]		FALSE
A_44_P147123	0.0283359	0.000735582	-0.11063	0.370973	0.895623	0.360236	0.340178	ENSRNOT00000003689	RGD1563512_predicted	UI-R-C0-hs-a-11-0-UI.r1 UI-R-C0 Rattus norvegicus cDNA clone UI-R-C0-hs-a-11-0-UI 5', mRNA sequence [BF550661]		FALSE
A_44_P242546	0.0222621	0.000426684	-1.7708	-0.897819	0.334363	-0.63519	-0.791765	AA859989	AA859989	AA859989 UI-R-E0-ca-a-06-0-UI.s1 UI-R-E0 Rattus norvegicus cDNA clone UI-R-E0-ca-a-06-0-UI 3' similar to dbj [AA859989]	AA859989	FALSE
A_44_P1023498	0.0491673	0.00247987	-0.272969	-0.308559	0.316822	-0.196648	-0.729263	NM_022701	Flot1	Rattus norvegicus flotillin 1 (Flot1), mRNA [NM_022701]	NM_022701	FALSE
A_44_P845705	0.0453721	0.00203662	0.131589	0.89852	1.48572	1.04497	0.921805	A_44_P845705	A_44_P845705			FALSE
A_42_P518016	0.0256796	0.00057456	-0.663783	-0.327185	0.107037	0.00369012	0.458162	NM_001025699	LOC313618	Rattus norvegicus macoilin (LOC313618), mRNA [NM_001025699]	NM_001025699	FALSE
A_43_P19998	0.0118963	0.000128404	-0.15852	-0.189692	-0.114774	0.0540206	0.415297	XM_233168	XM_233168	Rattus norvegicus similar to 5-methylthioadenosine phosphorylase (MTA phosphorylase) (MTAPase) (LOC298227), mRNA [XM_233168]	XM_233168	FALSE
A_44_P179767	0.0406142	0.00153289	0.717941	0.582797	-0.120437	0.108412	-0.0461431	NM_031502	Amy2	Rattus norvegicus amylase 2, pancreatic (Amy2), mRNA [NM_031502]	NM_031502	FALSE
A_44_P520748	0.00529126	2.38883e-05	-0.151385	-0.0777187	0.0323747	0.288181	1.21656	ENSRNOT00000039709	Cad	PREDICTED: Rattus norvegicus carbamyl phosphatate synthetase 2 (mapped) (Cad_mapped), mRNA [XM_343027]		FALSE
A_44_P209911	0.0228959	0.000456884	-1.07032	-0.854507	-0.862174	-0.796925	0.274415	NM_022869	Nolc1	Rattus norvegicus nucleolar and coiled-body phosphoprotein 1 (Nolc1), mRNA [NM_022869]	NM_022869	FALSE
A_44_P591370	0.0478307	0.00230538	-0.302013	-0.748295	-0.0350511	0.27377	1.83349	TC607399	TC607399			FALSE
A_44_P258173	0.0457192	0.00207685	-0.848714	-0.383638	0.0207928	-0.362988	-0.198821	XM_234901	Dos_predicted	PREDICTED: Rattus norvegicus downstream of Stk11 (predicted) (Dos_predicted), mRNA [XM_234901]	XM_234901	FALSE
A_44_P291862	0.0426146	0.00174691	-0.472666	-0.276749	0.224963	0.0339106	0.439843	BC090554	BC090554	Rattus norvegicus cDNA clone IMAGE:7315352, **** WARNING: chimeric clone ****. [BC090554]	BC090554	FALSE
A_44_P444339	0.0274226	0.000678239	-0.221037	-0.233042	-0.0303771	0.0821332	0.647482	XM_220446	Larp1_predicted	PREDICTED: Rattus norvegicus La ribonucleoprotein domain family, member 1 (predicted) (Larp1_predicted), mRNA [XM_220446]	XM_220446	FALSE
A_42_P734749	0.0327503	0.000961288	-0.203823	0.0081954	0.396612	0.077291	0.40681	ENSRNOT00000028275	Lrfn3_predicted	PREDICTED: Rattus norvegicus leucine rich repeat and fibronectin type III domain containing 3 (predicted) (Lrfn3_predicted), mRNA [XM_218483]		FALSE
A_44_P243262	0.0341839	0.00103971	0.613084	0.259684	0.113388	-0.230559	-0.652503	ENSRNOT00000042564	ENSRNOT00000042564	Histone H4 [Contains: Osteogenic growth peptide (OGP)]. [Source:Uniprot/SWISSPROT;Acc:P62804] [ENSRNOT00000042564]		FALSE
A_44_P904150	0.0356172	0.0011467	-0.157702	0.83055	0.747396	-0.105167	-0.54865	TC617637	TC617637			FALSE
A_44_P187530	0.0452888	0.00202489	0.399113	-0.140046	-0.61879	-0.894587	-0.77927	NM_001008858	RT1-T24-1	Rattus norvegicus histocompatibility 2, T region locus 24 (RT1-T24-1), mRNA [NM_001008858]	NM_001008858	FALSE
A_44_P667548	0.00746915	4.85579e-05	0.690618	0.421103	0.670698	1.34739	1.85067	A_44_P667548	A_44_P667548			FALSE
A_44_P1029298	0.0261273	0.000594194	0.101424	0.437215	1.09329	0.208295	-0.415943	ENSRNOT00000047831	Ppfibp2	Liprin beta 2 (Fragment). [Source:Uniprot/SPTREMBL;Acc:Q5UDQ9] [ENSRNOT00000047831]		FALSE
A_44_P107701	0.0398873	0.00146544	-0.121061	0.138083	-0.465286	0.383664	0.311016	ENSRNOT00000026458	ENSRNOT00000026458	Rattus norvegicus similar to Tryptophanyl-tRNA synthetase, mitochondrial precursor (Tryptophan--tRNA ligase) (TrpRS) ((Mt)TrpRS) (LOC310718), mRNA [XM_227513]		FALSE
A_44_P487960	0.0491673	0.00248167	-0.385074	0.698972	-0.123914	0.533544	-0.0715214	BM390495	BM390495	BM390495 UI-R-CN1-cjq-n-02-0-UI.s1 UI-R-CN1 Rattus norvegicus cDNA clone UI-R-CN1-cjq-n-02-0-UI 3', mRNA sequence [BM390495]	BM390495	FALSE
A_44_P192685	0.0423404	0.00171082	0.209059	0.301066	0.225812	0.542185	-0.1345	BF404765	BF404765	BF404765 UI-R-CA1-bid-d-04-0-UI.s1 UI-R-CA1 Rattus norvegicus cDNA clone UI-R-CA1-bid-d-04-0-UI 3', mRNA sequence [BF404765]	BF404765	FALSE
A_44_P468968	0.0085334	6.66491e-05	-0.057011	0.199069	0.00741923	0.388021	0.63305	ENSRNOT00000014405	ENSRNOT00000014405	Dicer1 protein (Fragment). [Source:Uniprot/SPTREMBL;Acc:Q4G034] [ENSRNOT00000014405]		FALSE
A_42_P779260	0.00806463	5.73052e-05	-0.474491	-0.290145	-0.0908307	0.142795	0.634409	XM_222200	Rbm19_predicted	PREDICTED: Rattus norvegicus RNA binding motif protein 19 (predicted) (Rbm19_predicted), mRNA [XM_222200]	XM_222200	FALSE
A_44_P158675	0.0391365	0.00139492	0.423524	0.229934	-0.211752	0.836333	1.59512	NM_212491	Wdr46	Rattus norvegicus WD repeat domain 46 (Wdr46), mRNA [NM_212491]	NM_212491	FALSE
A_44_P217266	0.0231079	0.000465288	0.0650794	-0.274746	-0.235631	0.545896	0.956125	NM_053490	Xpo1	Rattus norvegicus exportin 1, CRM1 homolog (yeast) (Xpo1), mRNA [NM_053490]	NM_053490	FALSE
A_43_P13386	0.0125382	0.000146044	-0.267623	0.0403342	0.221725	0.537405	1.11815	NM_139333	Prpf19	Rattus norvegicus PRP19/PSO4 pre-mRNA processing factor 19 homolog (S. cerevisiae) (Prpf19), mRNA [NM_139333]	NM_139333	FALSE
A_44_P166447	0.0468273	0.00218387	-0.454514	-0.257132	0.323535	0.153633	0.336452	ENSRNOT00000028127	RGD1561264_predicted	AGENCOURT_70325873 NIH_MGC_368 Rattus norvegicus cDNA clone IMAGE:8377838 5', mRNA sequence [DY547683]		FALSE
A_44_P415107	0.00971307	8.46331e-05	0.0418807	-0.0227058	0.169347	0.363595	0.59551	XM_233669	XM_233669	Rattus norvegicus similar to RIKEN cDNA 2310033C13 (LOC313702), mRNA [XM_233669]	XM_233669	FALSE
A_43_P17026	0.0279557	0.000708042	-0.317741	-0.28235	-0.201454	0.0324136	0.519649	ENSRNOT00000039377	Riok3_predicted	PREDICTED: Rattus norvegicus RIO kinase 3 (yeast) (predicted) (Riok3_predicted), mRNA [XM_341578]		FALSE
A_43_P19229	0.0131504	0.000163267	0.038672	0.131905	0.151924	0.397083	1.0335	ENSRNOT00000015628	Mocs1_predicted	PREDICTED: Rattus norvegicus molybdenum cofactor synthesis 1 (predicted) (Mocs1_predicted), mRNA [XM_236911]		FALSE
A_44_P649177	0.0393392	0.0014237	0.01853	0.427908	0.970314	0.358996	0.294849	ENSRNOT00000017391	RGD1564560_predicted	PREDICTED: Rattus norvegicus similar to RCK (predicted) (RGD1564560_predicted), mRNA [XM_576400]		FALSE
A_44_P192988	0.0227759	0.000449797	-0.117085	0.372594	0.0248799	0.367111	0.548017	NM_031617	Csnk1e	Rattus norvegicus casein kinase 1, epsilon (Csnk1e), mRNA [NM_031617]	NM_031617	FALSE
A_44_P340520	0.0142914	0.000189238	0.330473	-0.00603342	-0.0636672	-0.0557269	-0.12677	TC606706	TC606706			FALSE
A_44_P121556	0.0166535	0.000259522	-0.917067	-0.8331	-0.979137	-0.38546	0.585032	ENSRNOT00000019363	RGD1305222_predicted	PREDICTED: Rattus norvegicus similar to RIKEN cDNA 1810029B16 (predicted) (RGD1305222_predicted), mRNA [XM_214332]		FALSE
A_43_P10914	0.0221352	0.000419479	-0.6148	0.402559	1.4372	0.68847	0.117543	CB544748	Gnl3l	AMGNNUC:NRDG1-00032-A8-A nrdg1 (10855) Rattus norvegicus cDNA clone nrdg1-00032-a8 5', mRNA sequence [CB544748]	CB544748	FALSE
A_44_P670369	0.00814742	5.95884e-05	0.560151	-0.1121	-0.00808793	-0.14015	-0.414076	TC608875	TC608875	Q5C0N8_SCHJA (Q5C0N8) SJCHGC09573 protein (Fragment), partial (11%) [TC608875]		FALSE
A_44_P127278	0.0395627	0.00144683	-1.04378	-0.465085	-0.462559	-0.0520444	0.178241	AA955668	AA955668	AA955668 UI-R-E1-fc-g-07-0-UI.s1 UI-R-E1 Rattus norvegicus cDNA clone UI-R-E1-fc-g-07-0-UI 3' similar to gi [AA955668]	AA955668	FALSE
A_44_P367624	0.0258277	0.000581853	-0.260366	-0.153736	-0.257995	0.0219654	0.595927	NM_001047895	LOC317588	Rattus norvegicus hypothetical protein LOC317588 (LOC317588), mRNA [NM_001047895]	NM_001047895	FALSE
A_44_P315286	0.0224506	0.000441609	-1.82531	-0.944727	0.136456	-0.957718	-1.35085	AA963823	AA963823	AA963823 UI-R-C0-gs-c-12-0-UI.s1 UI-R-C0 Rattus norvegicus cDNA clone UI-R-C0-gs-c-12-0-UI 3', mRNA sequence [AA963823]	AA963823	FALSE
A_44_P496934	0.0457192	0.00207419	-0.218503	-0.307045	-0.210969	-0.180339	0.669781	NM_001005536	Srfbp1	Rattus norvegicus serum response factor binding protein 1 (Srfbp1), mRNA [NM_001005536]	NM_001005536	FALSE
A_44_P207595	0.0491605	0.00247657	-1.35179	-0.899425	-0.209526	-0.87198	-1.15275	AA818261	AA818261	AA818261 UI-R-A0-ax-b-09-0-UI.s1 UI-R-A0 Rattus norvegicus cDNA clone UI-R-A0-ax-b-09-0-UI 3' similar to gb [AA818261]	AA818261	FALSE
A_44_P899288	0.0469043	0.0021929	-0.165833	-0.00643039	0.290701	0.345451	0.605096	TC584777	TC584777	O27040_METTH (O27040) ATP synthase, subunit K, partial (8%) [TC584777]		FALSE
A_44_P105697	0.0467813	0.0021775	-0.0225952	0.141208	0.319126	0.513778	1.04418	NM_001007755	Scly	Rattus norvegicus selenocysteine lyase (Scly), mRNA [NM_001007755]	NM_001007755	FALSE
A_44_P325791	0.00906518	7.65322e-05	-0.754876	-0.507938	-0.435257	-0.329221	0.308448	NM_019376	Ywhag	Rattus norvegicus tyrosine 3-monooxygenase/tryptophan 5-monooxygenase activation protein, gamma polypeptide (Ywhag), mRNA [NM_019376]	NM_019376	FALSE
A_44_P444375	0.0228959	0.000456591	-1.41273	-0.693619	0.0762678	-0.747838	-0.849344	BI295601	BI295601	BI295601 UI-R-DK0-cek.1-c-11-0-UI.s2 UI-R-DK0 Rattus norvegicus cDNA clone UI-R-DK0-cek.1-c-11-0-UI 3', mRNA sequence [BI295601]	BI295601	FALSE
A_44_P397763	0.0172068	0.000272668	0.198738	0.172174	-0.134878	0.429332	1.6304	NM_022869	Nolc1	Rattus norvegicus nucleolar and coiled-body phosphoprotein 1 (Nolc1), mRNA [NM_022869]	NM_022869	FALSE
A_42_P497153	0.04435	0.00190581	0.125862	0.143072	0.0964038	0.215151	1.12522	NM_001012090	Zc3h8	Rattus norvegicus zinc finger CCCH type containing 8 (Zc3h8), mRNA [NM_001012090]	NM_001012090	FALSE
A_44_P144966	0.0389354	0.00137212	0.265832	0.207212	-0.00882316	0.628663	1.34508	ENSRNOT00000014718	Abcf2_predicted	similar to ATP-binding cassette, sub-family F (GCN20), member 2 (predicted) (RGD1563492_predicted), mRNA [Source:RefSeq_dna;Acc:XR_009183] [ENSRNOT00000014718]		FALSE
A_43_P13337	0.00124893	9.5855e-07	0.383805	0.098453	0.155219	1.09139	1.92553	NM_138911	Stip1	Rattus norvegicus stress-induced phosphoprotein 1 (Stip1), mRNA [NM_138911]	NM_138911	FALSE
A_44_P445536	0.0426146	0.0017438	-0.140087	-0.273713	-0.703536	-0.154035	0.587726	XM_241375	Narg1_predicted	PREDICTED: Rattus norvegicus NMDA receptor-regulated gene 1 (predicted) (Narg1_predicted), mRNA [XM_241375]	XM_241375	FALSE
A_44_P270658	0.0478307	0.00232626	0.0486801	0.249574	0.779724	0.343156	0.252991	AW918933	AW918933	EST350237 Rat gene index, normalized rat, norvegicus, Bento Soares Rattus norvegicus cDNA clone RGIFA52 5' end, mRNA sequence [AW918933]	AW918933	FALSE
A_44_P556929	0.0432965	0.0017905	-1.68976	-1.20905	-0.59267	-1.664	-1.8022	AA893552	AA893552	AA893552 EST197355 Normalized rat liver, Bento Soares Rattus sp. cDNA clone RLIAD83 3' end, mRNA sequence [AA893552]	AA893552	FALSE
A_44_P392611	0.0212391	0.000391556	-0.347237	-0.125752	0.0995698	0.191445	0.531704	BP483835	BP483835	BP483835 Rattus norvegicus pancreatic islet Rattus norvegicus cDNA clone RBC09148 5', mRNA sequence [BP483835]	BP483835	FALSE
A_44_P771792	0.0478307	0.00230248	0.0800043	-0.0112617	0.188837	0.353918	0.733073	BC091276	MGC109145	Rattus norvegicus similar to mannosidase, beta A, lysosomal-like, mRNA (cDNA clone IMAGE:7383362), complete cds. [BC091276]	BC091276	FALSE
A_44_P451627	0.0149493	0.000211247	-0.132077	0.266505	0.728759	0.00456941	0.13272	XM_237286	LOC301509	PREDICTED: Rattus norvegicus similar to tensin (LOC301509), mRNA [XM_237286]	XM_237286	FALSE
A_44_P225834	0.0358995	0.00117916	0.413862	0.110624	-0.351349	-0.00779885	-0.458118	AW918854	AW918854	AW918854 EST350158 Rat gene index, normalized rat, norvegicus, Bento Soares Rattus norvegicus cDNA clone RGIEZ51 5' end, mRNA sequence [AW918854]	AW918854	FALSE
A_44_P346744	0.0364556	0.00120641	0.008834	0.00492454	-0.190629	-0.563669	-1.1266	ENSRNOT00000049464	ENSRNOT00000049464	Histone H4 [Contains: Osteogenic growth peptide (OGP)]. [Source:Uniprot/SWISSPROT;Acc:P62804] [ENSRNOT00000049464]		FALSE
A_44_P128932	0.0318442	0.000917227	-0.0602417	-0.143287	-0.538721	-0.130557	0.71993	ENSRNOT00000056278	RGD1309077_predicted	AGENCOURT_28535268 NIH_MGC_246 Rattus norvegicus cDNA clone IMAGE:7370179 5', mRNA sequence [CO562775]		FALSE
A_42_P841193	0.00574478	3.34572e-05	0.0827272	0.523929	0.18839	1.80754	4.66618	NM_080399	Ddit4l	Rattus norvegicus DNA-damage-inducible transcript 4-like (Ddit4l), mRNA [NM_080399]	NM_080399	FALSE
A_44_P309913	0.0284757	0.000740497	-0.379084	0.101164	0.732591	0.440633	0.905243	CB547989	CB547989	AMGNNUC:NRHY5-00285-H7-A W Rat hypothalamus (10471) Rattus norvegicus cDNA clone nrhy5-00285-h7 5', mRNA sequence [CB547989]	CB547989	FALSE
A_44_P281482	0.0112589	0.000108777	-1.24666	-1.04566	-0.0392762	0.0146691	0.0294275	XM_216212	Chchd6_predicted	PREDICTED: Rattus norvegicus coiled-coil-helix-coiled-coil-helix domain containing 6 (predicted) (Chchd6_predicted), mRNA [XM_216212]	XM_216212	FALSE
A_44_P143478	0.024167	0.000513879	-0.43051	-0.118294	-0.187525	-1.25589	-0.976338	AI411618	AI411618	AI411618 EST239912 Normalized rat ovary, Bento Soares Rattus sp. cDNA clone ROVES37 3' end, mRNA sequence [AI411618]	AI411618	FALSE
A_44_P548812	0.0450237	0.00196763	0.0334192	0.182307	0.311771	0.567391	0.931654	ENSRNOT00000022670	RGD1305553_predicted	PREDICTED: Rattus norvegicus similar to 1200003M09Rik protein (predicted) (RGD1305553_predicted), mRNA [XM_220236]		FALSE
A_42_P823894	0.0314838	0.000882683	-0.72619	-0.0996985	-0.0222672	-0.519244	-0.721334	NM_053887	Map3k1	Rattus norvegicus mitogen activated protein kinase kinase kinase 1 (Map3k1), mRNA [NM_053887]	NM_053887	FALSE
A_44_P257526	0.00567834	2.69176e-05	-0.374299	0.532082	0.2815	0.805132	2.65301	NM_133411	Abcc4	Rattus norvegicus ATP-binding cassette, sub-family C (CFTR/MRP), member 4 (Abcc4), mRNA [NM_133411]	NM_133411	FALSE
A_43_P15719	0.0356172	0.00114336	-0.846643	-0.661746	-0.0391271	0.26857	0.306897	NM_001012197	Tra1_predicted	Rattus norvegicus tumor rejection antigen gp96 (predicted) (Tra1_predicted), mRNA [NM_001012197]	NM_001012197	FALSE
A_44_P622236	0.0419303	0.00165565	0.318256	0.116337	0.247317	0.415701	1.37948	TC629865	TC629865			FALSE
A_44_P424367	0.0357469	0.00115552	0.649373	0.0753076	-0.447777	0.393267	1.29095	NM_024351	Hspa8	Rattus norvegicus heat shock protein 8 (Hspa8), mRNA [NM_024351]	NM_024351	FALSE
A_44_P295548	0.0208757	0.000376298	0.314449	0.455028	0.845914	0.954597	1.22751	XR_006879	LOC315007	PREDICTED: Rattus norvegicus similar to Glyceraldehyde-3-phosphate dehydrogenase (GAPDH) (LOC315007), mRNA [XR_006879]	XR_006879	FALSE
A_44_P470528	0.00864522	6.98643e-05	-0.257724	-0.33856	-0.212212	0.274163	1.4416	NM_198783	Hrpap20	Rattus norvegicus hormone-regulated proliferation associated protein 20 (Hrpap20), mRNA [NM_198783]	NM_198783	FALSE
A_44_P666975	0.0353579	0.00110722	-1.10726	-0.391496	0.301598	-0.17026	-0.133463	AA892333	AA892333	AA892333 EST196136 Normalized rat kidney, Bento Soares Rattus sp. cDNA clone RKIAP19 3' end, mRNA sequence [AA892333]	AA892333	FALSE
A_44_P576289	0.029016	0.000764663	-0.0536073	0.111677	0.579528	0.595176	1.1757	BC088330	BC088330	Rattus norvegicus cDNA clone IMAGE:7365681 [BC088330]	BC088330	FALSE
A_44_P554454	0.000751521	3.51112e-07	-0.60204	-0.554772	-0.539059	0.140352	1.83659	NM_031614	Txnrd1	Rattus norvegicus thioredoxin reductase 1 (Txnrd1), mRNA [NM_031614]	NM_031614	FALSE
A_43_P12900	0.0374109	0.00128136	-0.344101	0.0638588	0.0748256	-0.149801	0.700079	NM_053689	Gtpbp4	Rattus norvegicus GTP binding protein 4 (Gtpbp4), mRNA [NM_053689]	NM_053689	FALSE
A_44_P102946	0.0463103	0.00212704	0.58303	0.257366	-0.0661765	0.73743	1.25167	ENSRNOT00000021462	Cul2_predicted	PREDICTED: Rattus norvegicus cullin 2 (predicted) (Cul2_predicted), mRNA [XM_001057445]		FALSE
A_44_P728149	0.0131504	0.000162894	-0.698407	-0.511041	-0.248629	0.241215	0.930724	NM_001024304	MGC108896	Rattus norvegicus similar to glutathione transferase GSTM7-7 (MGC108896), mRNA [NM_001024304]	NM_001024304	FALSE
A_44_P995218	0.00456536	1.73822e-05	-0.801705	-0.572522	-0.319745	0.10843	0.753829	TC638589	TC638589	MMU18644 methyltransferase-like protein 1 {Mus musculus} (exp=-1; wgp=0; cg=0), partial (30%) [TC638589]		FALSE
A_43_P18267	0.0333016	0.000987772	-0.292125	-0.427804	-0.366081	0.00461745	0.285605	NM_001009391	RGD1309016	Rattus norvegicus similar to RIKEN cDNA 2310057D15 (RGD1309016), mRNA [NM_001009391]	NM_001009391	FALSE
A_44_P997079	0.0419303	0.00165436	-0.239027	-0.168305	0.403117	0.210338	0.643112	XM_220981	RGD1308881_predicted	PREDICTED: Rattus norvegicus similar to D11lgp1 (predicted) (RGD1308881_predicted), mRNA [XM_220981]	XM_220981	FALSE
A_44_P999768	0.0057074	3.19119e-05	-0.450164	-0.477336	-0.234502	0.240801	0.938983	AA944506	AA944506	AA944506 EST200005 Normalized rat embryo, Bento Soares Rattus sp. cDNA clone REMAK24 3' end, mRNA sequence [AA944506]	AA944506	FALSE
A_44_P807536	0.0119399	0.000130988	-0.584814	-0.29847	0.444012	0.123738	0.134306	TC587305	TC587305			FALSE
A_44_P180240	0.0141877	0.000183831	-0.289409	-0.096521	-0.343787	0.185714	1.00614	XM_222559	RGD1309602_predicted	PREDICTED: Rattus norvegicus similar to RIKEN cDNA 2500001K11 (predicted) (RGD1309602_predicted), mRNA [XM_222559]	XM_222559	FALSE
A_44_P1030501	0.0390735	0.00138664	-0.321565	-0.211621	0.433507	0.295405	0.300616	ENSRNOT00000025626	RGD1310931_predicted	PREDICTED: Rattus norvegicus similar to hypothetical protein BC013949 (predicted) (RGD1310931_predicted), mRNA [XM_214300]		FALSE
A_44_P127442	0.0358995	0.00117294	-0.989791	-0.623307	-0.134966	-0.924046	-1.36747	AA875270	AA875270	AA875270 UI-R-E0-ce-b-07-0-UI.s1 UI-R-E0 Rattus norvegicus cDNA clone UI-R-E0-ce-b-07-0-UI 3' similar to gi [AA875270]	AA875270	FALSE
A_44_P348334	0.0292361	0.000784587	-0.609983	-0.268334	0.284168	-0.143569	-0.593288	AA997362	AA997362	AA997362 UI-R-C0-hl-c-08-0-UI.s1 UI-R-C0 Rattus norvegicus cDNA clone UI-R-C0-hl-c-08-0-UI 3', mRNA sequence [AA997362]	AA997362	FALSE
A_43_P16521	0.0426146	0.0017445	0.290728	0.114429	-0.0783572	0.905795	1.32515	NM_001012144	Tfg	Rattus norvegicus Trk-fused gene (Tfg), mRNA [NM_001012144]	NM_001012144	FALSE
A_44_P198539	0.0283206	0.000726489	-0.266939	0.377883	0.776375	0.0632147	-0.0697052	NM_133601	Cblb	Rattus norvegicus Casitas B-lineage lymphoma b (Cblb), mRNA [NM_133601]	NM_133601	FALSE
A_44_P215788	0.0178821	0.000289021	-0.338627	-0.534842	-0.244454	0.247083	0.592407	NM_001005905	Cct2	Rattus norvegicus chaperonin containing TCP1, subunit 2 (beta) (Cct2), mRNA [NM_001005905]	NM_001005905	FALSE
A_44_P153949	0.0251273	0.000554728	-0.482339	-0.0427001	0.458881	0.136876	0.1271	NM_017182	H2afy	Rattus norvegicus H2A histone family, member Y (H2afy), mRNA [NM_017182]	NM_017182	FALSE
A_44_P331128	0.0257063	0.000577956	-0.607498	-0.446391	-0.400335	-0.144213	0.351013	ENSRNOT00000018670	Senp3	Senp3 protein. [Source:Uniprot/SPTREMBL;Acc:Q5FVF2] [ENSRNOT00000018670]		FALSE
A_44_P142201	0.0478307	0.00233777	-0.20586	-0.0741296	0.159603	0.343063	0.488321	NM_013159	Ide	Rattus norvegicus insulin degrading enzyme (Ide), mRNA [NM_013159]	NM_013159	FALSE
A_44_P318188	0.0424129	0.00171566	-1.69662	-0.606253	0.793079	-0.944825	-1.32892	BI284268	BI284268	UI-R-CX0s-ccq-b-06-0-UI.s1 UI-R-CX0s Rattus norvegicus cDNA clone UI-R-CX0s-ccq-b-06-0-UI 3', mRNA sequence [BI284268]	BI284268	FALSE
A_44_P266879	0.044043	0.00185319	-0.466972	-0.271113	0.371678	0.185385	0.0999918	NM_212548	Rdbp	Rattus norvegicus RD RNA-binding protein (Rdbp), mRNA [NM_212548]	NM_212548	FALSE
A_42_P629394	0.0364991	0.00122569	0.0648342	0.292652	0.649949	0.523837	0.823912	NM_031683	Smc1l1	Rattus norvegicus structural maintenance of chromosomes 1 like 1 (S. cerevisiae) (Smc1l1), mRNA [NM_031683]	NM_031683	FALSE
A_44_P808218	0.0057074	3.09975e-05	-0.656191	-0.375325	0.12834	-0.714657	-1.07364	XM_233470	RGD1311937_predicted	PREDICTED: Rattus norvegicus similar to hypothetical protein MGC17299 (predicted) (RGD1311937_predicted), mRNA [XM_233470]	XM_233470	FALSE
A_44_P573915	0.0220243	0.000412645	0.263694	0.0515746	-0.130862	0.0823007	0.954078	AW142606	AW142606	AW142606 EST292858 Normalized rat embryo, Bento Soares Rattus sp. cDNA clone RGIAQ53 5' end, mRNA sequence [AW142606]	AW142606	FALSE
A_44_P221588	0.0478307	0.00230861	-0.275521	0.379	1.30757	0.47728	0.150136	AY724517	Ppp3ca	Rattus norvegicus clone UI-R-FJ0-cpy-k-11-0-UI unknown mRNA. [AY724517]	AY724517	FALSE
A_44_P651866	0.0360258	0.00118702	0.595832	0.381368	-0.0893654	0.636656	1.48443	XR_009004	RGD1560288_predicted	PREDICTED: Rattus norvegicus similar to DNA segment, Chr 19, Brigham & Womens Genetics 1357 expressed (predicted) (RGD1560288_predicted), mRNA [XR_009004]	XR_009004	FALSE
A_44_P1058112	0.0181007	0.00029337	-0.418893	-0.448815	-0.408533	0.0882794	0.544317	NM_001009627	Yars2	Rattus norvegicus tyrosyl-tRNA synthetase 2 (mitochondrial) (Yars2), mRNA [NM_001009627]	NM_001009627	FALSE
A_44_P1014445	0.0388979	0.00135819	0.0539706	0.130007	-0.132032	0.381488	1.01798	ENSRNOT00000025149	RGD1562173_predicted	Rattus norvegicus similar to zinc finger protein (LOC300685), mRNA [XM_217118]		FALSE
A_43_P12211	0.0148397	0.000208358	0.145201	0.155939	0.215479	0.573943	1.17149	NM_022382	Pde4dip	Rattus norvegicus phosphodiesterase 4D interacting protein (myomegalin) (Pde4dip), mRNA [NM_022382]	NM_022382	FALSE
A_44_P728469	0.0469043	0.00219572	-0.322359	-0.475921	-0.229805	0.281986	0.774086	NM_022224	Pter	Rattus norvegicus phosphotriesterase related (Pter), mRNA [NM_022224]	NM_022224	FALSE
A_44_P493956	0.0318442	0.000917018	-1.00693	-0.630132	-0.333861	0.0442961	0.168421	NM_053849	Pdia4	Rattus norvegicus protein disulfide isomerase associated 4 (Pdia4), mRNA [NM_053849]	NM_053849	FALSE
A_44_P181836	0.0222621	0.00042723	-0.713488	-0.167654	0.53132	0.247426	0.141194	AW915351	AW915351	AW915351 EST346655 Normalized rat embryo, Bento Soares Rattus sp. cDNA clone RGICU38 5' end, mRNA sequence [AW915351]	AW915351	FALSE
A_43_P17743	0.00219404	4.16026e-06	-0.0368427	-0.410706	-0.41014	1.16949	2.48038	NM_001009474	Pir	Rattus norvegicus pirin (Pir), mRNA [NM_001009474]	NM_001009474	FALSE
A_44_P232642	0.0231956	0.000475941	0.259648	0.0353349	-0.407878	0.633708	1.41317	NM_001008301	Usp14	Rattus norvegicus ubiquitin specific protease 14 (Usp14), mRNA [NM_001008301]	NM_001008301	FALSE
A_44_P469088	0.0481179	0.00237874	0.774192	-0.141193	-0.0617539	-0.483868	-0.382928	ENSRNOT00000023365	Prkag3_predicted	Rattus norvegicus similar to AMP-activated protein kinase gamma 3 subunit long form (LOC301518), mRNA [XM_237293]		FALSE
A_44_P181910	0.0137468	0.000173775	-1.01341	-0.470291	0.223536	-0.17305	0.133229	AI599071	AI599071	AI599071 EST250774 Normalized rat embryo, Bento Soares Rattus sp. cDNA clone REMEB14 3' end, mRNA sequence [AI599071]	AI599071	FALSE
A_44_P191753	0.00501034	2.06244e-05	-0.222878	-0.131976	0.0232663	0.694635	1.13026	NM_001013170	Wars	Rattus norvegicus tryptophanyl-tRNA synthetase (Wars), mRNA [NM_001013170]	NM_001013170	FALSE
A_44_P171285	0.00494747	2.01026e-05	-0.145626	-0.112476	-0.0369868	0.496359	1.24953	NM_001024250	Bop1	Rattus norvegicus block of proliferation 1 (Bop1), mRNA [NM_001024250]	NM_001024250	FALSE
A_44_P214121	0.0332002	0.000983265	-0.366264	0.255846	0.578314	0.309759	0.557815	AW920871	AW920871	AW920871 EST352175 Rat gene index, normalized rat, norvegicus, Bento Soares Rattus norvegicus cDNA clone RGIHH46 5' end, mRNA sequence [AW920871]	AW920871	FALSE
A_43_P17925	0.0356172	0.00113522	-0.885639	-0.432168	-0.683594	-1.57073	-1.38058	XM_221074	Abca8b_predicted	PREDICTED: Rattus norvegicus ATP-binding cassette, sub-family A (ABC1), member 8b (predicted) (Abca8b_predicted), mRNA [XM_221074]	XM_221074	FALSE
A_44_P947423	0.0349865	0.00109058	1.15643	-0.0216094	-0.0879673	-0.111555	-0.053512	TC642341	TC642341	Q80XF2_MOUSE (Q80XF2) Transcriptional factor SOX1, partial (42%) [TC642341]		FALSE
A_43_P12275	0.00203963	3.31642e-06	0.188145	0.775404	1.78897	1.96063	2.76467	NM_022635	Cml4	Rattus norvegicus camello-like 4 (Cml4), mRNA [NM_022635]	NM_022635	FALSE
A_43_P11770	0.0228256	0.000452461	-1.73352	-1.30025	0.179065	0.194351	-0.00749874	NM_017006	G6pdx	Rattus norvegicus glucose-6-phosphate dehydrogenase X-linked (G6pdx), mRNA [NM_017006]	NM_017006	FALSE
A_44_P767519	0.0152949	0.00021954	0.312169	0.933565	0.810367	-0.122936	-0.622135	BF523242	BF523242	UI-R-C3-ti-g-04-0-UI.r1 UI-R-C3 Rattus norvegicus cDNA clone UI-R-C3-ti-g-04-0-UI 5', mRNA sequence [BF523242]	BF523242	FALSE
A_44_P337088	0.0140679	0.00018101	-0.343399	-0.259801	-0.608634	0.107367	1.15794	NM_133609	Eif2b3	Rattus norvegicus eukaryotic translation initiation factor 2B, subunit 3 gamma (Eif2b3), mRNA [NM_133609]	NM_133609	FALSE
A_44_P321559	0.0183737	0.000301112	0.479076	-0.654273	-0.308963	-0.526554	-0.0609614	ENSRNOT00000060581	ENSRNOT00000060581	similar to Ribose-phosphate pyrophosphokinase I (Phosphoribosyl pyrophosphate synthetase I) (PRS-I) (LOC300479), mRNA [Source:RefSeq_dna;Acc:XR_005543] [ENSRNOT00000060581]		FALSE
A_44_P348533	0.0470186	0.00221189	-0.151317	0.0778472	0.218357	0.368647	0.713092	CF109168	CF109168	Shultzomica02419 Rat lung airway and parenchyma cDNA libraries Rattus norvegicus cDNA clone Contig2075 5', mRNA sequence [CF109168]	CF109168	FALSE
A_43_P10806	0.0410936	0.00156549	-0.640474	-0.229615	0.000111938	-0.313198	-0.0464034	XM_347166	Baz1b	PREDICTED: Rattus norvegicus bromodomain adjacent to zinc finger domain protein 1B (Baz1b), mRNA [XM_347166]	XM_347166	FALSE
A_44_P323634	0.00393085	1.36648e-05	-0.989517	-0.531911	-0.114313	0.121921	0.637725	XM_001062991	LOC685245	PREDICTED: Rattus norvegicus similar to CG4573-PA (LOC685245), mRNA [XM_001062991]	XM_001062991	FALSE
A_43_P10563	0.023454	0.000489199	0.653511	-0.0464869	0.0489515	-0.686646	-0.877802	BF391881	BF391881	UI-R-CA1-bcy-f-09-0-UI.s1 UI-R-CA1 Rattus norvegicus cDNA clone UI-R-CA1-bcy-f-09-0-UI 3', mRNA sequence [BF391881]	BF391881	FALSE
A_44_P559149	0.0280439	0.000711544	-1.12507	-0.547403	-0.0734628	-0.909778	-1.2124	CB568740	CB568740	AGENCOURT_12599762 NICHD_Rr_Pit1 Rattus norvegicus cDNA clone IMAGE:6922186 5', mRNA sequence [CB568740]	CB568740	FALSE
A_44_P135339	0.00501034	2.09324e-05	0.0786291	-0.482702	-0.228435	1.12846	1.77303	NM_175761	Hspca	Rattus norvegicus heat shock protein 1, alpha (Hspca), mRNA [NM_175761]	NM_175761	FALSE
A_44_P178479	0.0279287	0.000705865	0.150781	0.0695949	-0.457276	0.398457	1.13458	ENSRNOT00000003582	Wdr50_predicted	PREDICTED: Rattus norvegicus WD repeat domain 50 (predicted) (Wdr50_predicted), mRNA [XM_220851]		FALSE
A_43_P18069	0.0356172	0.00113235	0.386709	-0.357363	0.151095	-0.737925	-0.298384	ENSRNOT00000012696	RGD1309414_predicted	PREDICTED: Rattus norvegicus similar to KIAA0913 protein (predicted) (RGD1309414_predicted), mRNA [XM_341279]		FALSE
A_44_P820780	0.0438731	0.00183019	-0.468222	-0.142167	0.397577	-0.165844	-0.579535	AW917383	AW917383	AW917383 EST348687 Rat gene index, normalized rat, norvegicus, Bento Soares Rattus norvegicus cDNA clone RGIED17 5' end, mRNA sequence [AW917383]	AW917383	FALSE
A_44_P165037	0.0464088	0.0021411	-0.953418	0.0355566	1.10983	0.0750636	-0.39314	XR_007127	LOC691504	PREDICTED: Rattus norvegicus similar to Zinc finger protein ZFPM1 (Zinc finger protein multitype 1) (Friend of GATA protein 1) (Friend of GATA-1) (FOG-1) (LOC691504), mRNA [XR_007127]	XR_007127	FALSE
A_44_P452860	0.020667	0.000367406	-0.281286	-0.125862	-0.272396	0.3109	1.15037	A_44_P452860	A_44_P452860			FALSE
A_44_P476372	0.0057074	3.13821e-05	-0.337356	-0.15581	0.000421882	0.131544	0.634682	XM_227405	Ubqln4_predicted	PREDICTED: Rattus norvegicus ubiquilin 4 (predicted) (Ubqln4_predicted), mRNA [XM_227405]	XM_227405	FALSE
A_44_P128929	0.0305122	0.000847178	-0.214027	-0.0774739	0.189606	0.148924	0.775855	ENSRNOT00000038123	Zfp692_predicted	PREDICTED: Rattus norvegicus zinc finger protein 692 (predicted) (Zfp692_predicted), mRNA [XM_220455]		FALSE
A_44_P458945	0.0475439	0.00227309	0.462679	-0.448857	-0.363422	-0.718779	-0.838665	NM_001000204	Olr229_predicted	Rattus norvegicus olfactory receptor 229 (predicted) (Olr229_predicted), mRNA [NM_001000204]	NM_001000204	FALSE
A_44_P213139	0.0413288	0.00157947	-0.151808	-0.151611	0.291661	0.416044	0.595005	A_44_P213139	A_44_P213139			FALSE
A_42_P687767	0.0389354	0.00136847	-0.724443	-0.531383	0.14799	-0.0753552	-0.0101659	ENSRNOT00000025386	RGD1308635_predicted	PREDICTED: Rattus norvegicus similar to CG12379-PA (predicted) (RGD1308635_predicted), mRNA [XM_216011]		FALSE
A_44_P680341	0.00955902	8.28592e-05	0.184458	0.308677	0.548604	-0.227919	-0.6545	XM_230647	Rin2_predicted	PREDICTED: Rattus norvegicus Ras and Rab interactor 2 (predicted) (Rin2_predicted), mRNA [XM_230647]	XM_230647	FALSE
A_44_P180865	0.0057074	2.95627e-05	-1.04059	-0.698084	-0.503176	-0.128955	0.590687	BQ203246	BQ203246	UI-R-DN1-cmt-f-22-0-UI.s1 UI-R-DN1 Rattus norvegicus cDNA clone UI-R-DN1-cmt-f-22-0-UI 3', mRNA sequence [BQ203246]	BQ203246	FALSE
A_44_P1052798	0.0451054	0.00197485	-0.159274	0.637714	1.26077	0.523647	0.568125	ENSRNOT00000033490	Ate1_predicted	Rattus norvegicus similar to Arginine-tRNA-protein transferase 1 (LOC293526), mRNA [XM_215086]		FALSE
A_44_P530896	0.0364991	0.00122146	-0.885969	-0.961605	-0.183633	-0.685677	-0.969303	AA858639	AA858639	AA858639 UI-R-E0-bq-d-07-0-UI.s1 UI-R-E0 Rattus norvegicus cDNA clone UI-R-E0-bq-d-07-0-UI 3' similar to emb [AA858639]	AA858639	FALSE
A_44_P469103	0.0118963	0.000128564	0.10062	0.0724561	0.171505	0.700517	1.149	ENSRNOT00000004150	RGD1564623_predicted	Rattus norvegicus cDNA clone IMAGE:7193285 [BC087109]		FALSE
A_44_P637217	0.0437022	0.00181714	-0.0139916	0.227365	0.510684	0.224562	0.701939	CF109032	CF109032	Shultzomica02283 Rat lung airway and parenchyma cDNA libraries Rattus norvegicus cDNA clone Contig1944 5', mRNA sequence [CF109032]	CF109032	FALSE
A_44_P450518	0.0295873	0.000798789	-1.04928	-1.27315	-0.998586	-0.315523	0.128464	ENSRNOT00000006883	RGD1563195_predicted	similar to Ran-interacting protein MOG1 (predicted) (RGD1563527_predicted), mRNA [Source:RefSeq_dna;Acc:XR_007818] [ENSRNOT00000006883]		FALSE
A_44_P131031	0.041636	0.00160954	0.262365	0.066746	-0.658443	0.34946	1.33548	XR_006475	LOC499479	PREDICTED: Rattus norvegicus similar to heat shock protein 8 (LOC499479), mRNA [XR_006475]	XR_006475	FALSE
A_44_P764517	0.0299407	0.000817794	0.00796759	0.0222863	-0.117615	0.404432	1.17308	TC617960	TC617960	Q9LKM4_WHEAT (Q9LKM4) Cold-responsive protein, partial (30%) [TC592787]		FALSE
A_44_P221974	3.19223e-07	2.88237e-11	-1.07441	-0.392332	1.36467	1.84253	2.69712	NM_080581	Abcc3	Rattus norvegicus ATP-binding cassette, sub-family C (CFTR/MRP), member 3 (Abcc3), mRNA [NM_080581]	NM_080581	FALSE
A_44_P440392	0.0318442	0.000908669	-0.105429	-0.276206	-0.786179	-0.00855732	0.950095	NM_001013998	RGD1310975	Rattus norvegicus similar to CG31759-PA (RGD1310975), mRNA [NM_001013998]	NM_001013998	FALSE
A_43_P10548	0.0214837	0.000400577	1.10482	-0.196665	0.303774	-0.612061	-0.911013	BI278558	BI278558	UI-R-CW0-bxn-b-09-0-UI.s1 UI-R-CW0 Rattus norvegicus cDNA clone UI-R-CW0-bxn-b-09-0-UI 3', mRNA sequence [BI278558]	BI278558	FALSE
A_44_P861509	0.0470699	0.00221643	-0.0958765	0.85038	1.35507	0.263711	-0.320009	A_44_P861509	A_44_P861509			FALSE
A_44_P101052	0.0452092	0.00198324	-0.185047	-0.0720019	-0.39605	0.0669103	0.5853	ENSRNOT00000057751	Thap7	Rattus norvegicus THAP domain containing 7, mRNA (cDNA clone IMAGE:7110405) [BC083814]		FALSE
A_44_P487504	0.0462822	0.00212249	-0.115945	0.296439	1.21161	0.66861	0.741377	ENSRNOT00000047749	ENSRNOT00000047749	Rattus norvegicus similar to Histone-lysine N-methyltransferase, H4 lysine-20 specific (Histone H4-K20 methyltransferase) (H4-K20-HMTase) (SET domain-containing protein 8) (PR/SET domain-containing protein 07) (PR/SET07) (PR-Set7) (LOC310436), mRNA...		FALSE
A_44_P518434	0.0318442	0.000908098	-0.0183846	0.311881	0.580236	0.696034	0.842412	ENSRNOT00000049706	Mrpl4_predicted	PREDICTED: Rattus norvegicus mitochondrial ribosomal protein L4 (predicted) (Mrpl4_predicted), mRNA [XM_343354]		FALSE
A_44_P357703	0.0166535	0.0002595	0.162828	-0.581556	-0.579679	-1.09962	-0.878463	BE109108	BE109108	BE109108 UI-R-BS1-azb-a-11-0-UI.s1 UI-R-BS1 Rattus norvegicus cDNA clone UI-R-BS1-azb-a-11-0-UI 3', mRNA sequence [BE109108]	BE109108	FALSE
A_44_P729564	0.00203963	3.27412e-06	-0.652402	0.0905393	0.738851	0.346203	0.675749	DY570167	DY570167	AGENCOURT_70342463 NIH_MGC_368 Rattus norvegicus cDNA clone IMAGE:8376762 5', mRNA sequence [DY570167]	DY570167	FALSE
A_42_P665106	0.044043	0.00185019	0.11518	-0.00298905	0.18198	0.710033	0.920585	NM_057122	Psmc4	Rattus norvegicus proteasome (prosome, macropain) 26S subunit, ATPase, 4 (Psmc4), mRNA [NM_057122]	NM_057122	FALSE
A_44_P496631	0.0399134	0.00147239	-0.217985	-0.0627135	-0.38333	0.092374	0.925844	ENSRNOT00000010871	Timm9	Mitochondrial import inner membrane translocase subunit Tim9. [Source:Uniprot/SWISSPROT;Acc:Q9WV97] [ENSRNOT00000010871]		FALSE
A_42_P728925	0.0118963	0.000122925	-0.642415	-0.230063	0.1487	0.153065	0.470596	NM_207592	Gpi	Rattus norvegicus glucose phosphate isomerase (Gpi), mRNA [NM_207592]	NM_207592	FALSE
A_44_P1029820	0.022931	0.000458619	-0.863899	-0.600964	-0.0776409	-0.174781	-0.0372295	NM_130894	Mfn2	Rattus norvegicus mitofusin 2 (Mfn2), mRNA [NM_130894]	NM_130894	FALSE
A_44_P403457	0.0364991	0.00121155	-0.410259	-0.399533	-0.735502	0.00435472	0.537386	ENSRNOT00000019670	RGD1311824_predicted	PREDICTED: Rattus norvegicus similar to RIKEN cDNA 2310038H17 (predicted) (RGD1311824_predicted), mRNA [XM_237209]		FALSE
A_44_P895064	0.0357764	0.00115809	-0.768446	0.349021	1.12556	-0.0652984	-0.191506	XM_341290	RGD1562692_predicted	PREDICTED: Rattus norvegicus similar to spinocerebellar ataxia 7 homolog (predicted) (RGD1562692_predicted), mRNA [XM_341290]	XM_341290	FALSE
A_44_P311969	0.00227678	4.60348e-06	-0.258925	-0.122026	0.416937	0.573927	0.863653	XM_342996	LOC362681	Rattus norvegicus similar to hypothetical protein FLJ90811 (LOC362681), mRNA [XM_342996]	XM_342996	FALSE
A_44_P335415	0.0118963	0.00012758	0.383332	0.571373	0.976287	1.08325	1.37177	ENSRNOT00000034749	ENSRNOT00000034749	similar to glyceraldehyde-3-phosphate dehydrogenase (predicted) (RGD1559621_predicted), mRNA [Source:RefSeq_dna;Acc:XR_007411] [ENSRNOT00000034749]		FALSE
A_44_P691232	0.00502515	2.19238e-05	0.00447166	-0.00629115	0.939799	0.963118	1.51774	TC605874	TC605874			FALSE
A_43_P20568	0.00324596	8.99596e-06	-0.390277	-0.194245	-0.224899	0.129822	0.804909	XM_213927	RGD1311526_predicted	PREDICTED: Rattus norvegicus similar to RIKEN cDNA 5630401D24 (predicted) (RGD1311526_predicted), mRNA [XM_213927]	XM_213927	FALSE
A_44_P374817	0.00203963	3.4919e-06	-0.996687	-0.674863	-0.676391	-0.272438	0.529687	NM_031014	Atic	Rattus norvegicus 5-aminoimidazole-4-carboxamide ribonucleotide formyltransferase/IMP cyclohydrolase (Atic), mRNA [NM_031014]	NM_031014	FALSE
A_44_P162583	0.0478307	0.00231725	-0.304781	0.018693	0.0832328	0.252707	0.656806	CF110052	Rac1	Shultzomica03303 Rat lung airway and parenchyma cDNA libraries Rattus norvegicus cDNA clone Contig2911 5', mRNA sequence [CF110052]	CF110052	FALSE
A_44_P1035733	0.0497567	0.00252996	-0.209813	0.300034	0.765938	0.568483	0.884272	NM_133419	Dkc1	Rattus norvegicus dyskeratosis congenita 1, dyskerin (Dkc1), mRNA [NM_133419]	NM_133419	FALSE
A_44_P489683	0.0486348	0.00242334	0.231816	0.788769	0.589842	-0.0134892	1.21024	XM_574357	Ptprh	PREDICTED: Rattus norvegicus protein tyrosine phosphatase, receptor type, H (Ptprh), mRNA [XM_574357]	XM_574357	FALSE
A_44_P641108	0.0330412	0.000977065	-0.0664324	-0.283805	-0.256969	-0.0462502	1.09714	TC601039	TC601039	BC023614 MECT1 protein {Homo sapiens} (exp=-1; wgp=0; cg=0), partial (3%) [TC601039]		FALSE
A_44_P899822	0.0231146	0.00046713	-0.963036	-0.553362	-0.257263	-0.25528	0.461784	TC594914	TC594914			FALSE
A_44_P180255	0.0318442	0.000907297	-0.382298	-0.254068	0.136708	0.188172	0.551388	ENSRNOT00000027478	Akt1s1_predicted	PREDICTED: Rattus norvegicus AKT1 substrate 1 (proline-rich) (predicted) (Akt1s1_predicted), mRNA [XM_238103]		FALSE
A_44_P782405	0.0441652	0.00186904	0.20296	-0.31567	-0.340876	0.258417	1.29805	NM_001024288	LOC499279	Rattus norvegicus hypothetical gene supported by BC079265 (LOC499279), mRNA [NM_001024288]	NM_001024288	FALSE
A_44_P438478	0.0413288	0.0015882	0.206003	0.141936	-0.153363	-0.047573	0.72141	ENSRNOT00000029141	ENSRNOT00000029141	similar to Fructose-bisphosphate aldolase A (Muscle-type aldolase) (Aldolase 1) (LOC290761), mRNA [Source:RefSeq_dna;Acc:XR_007988] [ENSRNOT00000029141]		FALSE
A_44_P311247	0.016262	0.000245214	-0.145003	-0.151425	-0.0552371	0.25096	0.948117	NM_212515	MGC72932	Rattus norvegicus similar to NHP2-like protein 1 (High mobility group-like nuclear protein 2 homolog 1) ([U4/U6.U5] tri-snRNP 15.5 kDa protein) (OTK27) (MGC72932), mRNA [NM_212515]	NM_212515	FALSE
A_44_P330717	0.014606	0.000198553	-0.0381753	0.0442455	0.376951	0.595069	0.885727	ENSRNOT00000047137	LOC294844	PREDICTED: Rattus norvegicus similar to Glyceraldehyde-3-phosphate dehydrogenase (GAPDH) (LOC294844), mRNA [XM_001062661]		FALSE
A_44_P156609	0.0469043	0.00219767	0.339514	0.200599	-0.454568	-0.128651	0.478078	NM_001012021	Zipro1	Rattus norvegicus zinc finger proliferation 1 (Zipro1), mRNA [NM_001012021]	NM_001012021	FALSE
A_42_P807798	0.0441652	0.00187029	-0.335468	-0.384591	0.0347413	0.13617	0.422804	ENSRNOT00000020781	Hemk1_predicted	PREDICTED: Rattus norvegicus HemK methyltransferase family member 1 (predicted) (Hemk1_predicted), mRNA [XM_217259]		FALSE
A_44_P176003	0.0149244	0.000210222	-0.136623	-0.200617	0.0741886	0.471708	0.762439	NM_001013182	RGD1305117	Rattus norvegicus similar to HN1-like protein (RGD1305117), mRNA [NM_001013182]	NM_001013182	FALSE
A_44_P1046845	0.0473483	0.00224406	-0.621602	-0.47665	-0.103343	-0.124813	0.124068	NM_001009391	RGD1309016	Rattus norvegicus similar to RIKEN cDNA 2310057D15 (RGD1309016), mRNA [NM_001009391]	NM_001009391	FALSE
A_44_P138355	0.00858552	6.89943e-05	-0.393919	-0.0490615	0.385389	0.756332	0.776792	XM_001070211	RGD1561232_predicted	PREDICTED: Rattus norvegicus similar to Keratin, type II cytoskeletal 8 (Cytokeratin 8) (Cytokeratin endo A) (predicted) (RGD1561232_predicted), mRNA [XM_001070211]	XM_001070211	FALSE
A_44_P402435	0.0368237	0.00125018	-0.243496	-0.36132	-0.191157	0.23288	0.594051	AJ005161	LOC679068	RRAJ5161 Rattus rattus mRNA for mitochondrial translational elongation factor [AJ005161]	AJ005161	FALSE
A_42_P774439	0.020667	0.000368554	-0.488376	-0.303874	0.169185	0.361955	0.527239	BG663067	BG663067	BG663067 DRA07G07 Rat DRG Library Rattus norvegicus cDNA clone DRA07G07 5', mRNA sequence [BG663067]	BG663067	FALSE
A_42_P454929	0.00989527	8.71064e-05	-0.447628	-0.494572	-0.0603453	0.337441	0.653903	XM_341784	Cdc42ep5_predicted	PREDICTED: Rattus norvegicus CDC42 effector protein (Rho GTPase binding) 5 (predicted) (Cdc42ep5_predicted), mRNA [XM_341784]	XM_341784	FALSE
A_44_P758422	0.0404062	0.00151409	-0.453182	0.268686	1.09731	-0.170263	0.767349	AW143472	AW143472	EST293872 Normalized rat embryo, Bento Soares Rattus sp. cDNA clone RGIBV42 5' end, mRNA sequence [AW143472]	AW143472	FALSE
A_44_P793098	0.00989527	8.71141e-05	-0.823144	-0.619218	-0.338566	0.106708	0.465962	DV726847	DV726847	RVL19231 Wackym-Soares normalized rat vestibular cDNA library Rattus norvegicus cDNA 5', mRNA sequence [DV726847]	DV726847	FALSE
A_44_P380202	0.0356172	0.00114528	-0.235342	0.0793476	0.456308	0.5729	0.658729	XM_578535	RGD1564116_predicted	PREDICTED: Rattus norvegicus similar to WD repeat domain 35 (predicted) (RGD1564116_predicted), mRNA [XM_578535]	XM_578535	FALSE
A_44_P1052467	0.00800925	5.64083e-05	-0.304221	0.00687253	-0.249446	0.417419	0.839245	NM_031685	Gosr2	Rattus norvegicus golgi SNAP receptor complex member 2 (Gosr2), mRNA [NM_031685]	NM_031685	FALSE
A_44_P476733	0.000751521	2.50922e-07	-0.592997	-0.746282	-0.159677	1.21961	2.08447	NM_017000	Nqo1	Rattus norvegicus NAD(P)H dehydrogenase, quinone 1 (Nqo1), mRNA [NM_017000]	NM_017000	FALSE
A_44_P700958	0.0188297	0.000323037	-0.0735089	0.0249643	0.372915	0.617496	0.820799	CO554673	CO554673	AGENCOURT_28453164 NIH_MGC_247 Rattus norvegicus cDNA clone IMAGE:7322747 5', mRNA sequence [CO554673]	CO554673	FALSE
A_43_P21864	0.0441691	0.00189239	-0.359981	-0.467987	-0.514974	-0.0186291	0.432637	CB547155	CB547155	CB547155 AMGNNUC:SRPB2-00142-B6-A srpb2 (10220) Rattus norvegicus cDNA clone srpb2-00142-b6 5', mRNA sequence [CB547155]	CB547155	FALSE
A_43_P21085	0.0283359	0.000733968	-0.609603	-0.795797	-0.924306	-0.271173	0.158363	ENSRNOT00000047223	Klhl2_predicted	PREDICTED: Rattus norvegicus kelch-like 2, Mayven (Drosophila) (predicted) (Klhl2_predicted), mRNA [XM_214331]		FALSE
A_44_P1029770	0.0398873	0.00146767	0.112084	-0.0911608	-0.587484	0.16065	1.63024	NM_001025732	Nol5a	Rattus norvegicus nucleolar protein 5A (Nol5a), mRNA [NM_001025732]	NM_001025732	FALSE
A_44_P147726	0.0237094	0.000496667	-0.305832	0.0450721	0.192724	0.358451	0.653903	ENSRNOT00000004007	RGD1305052_predicted	PREDICTED: Rattus norvegicus similar to phosphatidylglycerophosphate synthase (predicted) (RGD1305052_predicted), mRNA [XM_221142]		FALSE
A_44_P714868	0.0419303	0.00164289	-0.907393	-0.561143	-0.289567	-1.05247	-1.03622	TC583911	TC583911	Q4RUH7_TETNG (Q4RUH7) Chromosome 1 SCAF14995, whole genome shotgun sequence. (Fragment), partial (3%) [TC631387]		FALSE
A_44_P412092	0.00401193	1.43089e-05	-0.321949	-0.521668	-0.0145284	0.239113	0.449501	NM_172075	Thop1	Rattus norvegicus thimet oligopeptidase 1 (Thop1), mRNA [NM_172075]	NM_172075	FALSE
A_44_P149662	0.0156109	0.0002287	-1.02023	-0.390426	-0.182564	-0.489652	0.856598	NM_001024979	RGD1311086	Rattus norvegicus similar to RIKEN cDNA 2610029K21 (RGD1311086), mRNA [NM_001024979]	NM_001024979	FALSE
A_43_P15751	0.0104079	9.72291e-05	0.561224	-0.459694	-0.18626	-0.530667	-0.590717	M92075	Grm2	Rat metabotropic glutamate receptor 2 mRNA, primary transcript. [M92075]	M92075	FALSE
A_44_P774512	0.00789754	5.5265e-05	0.846779	0.0422693	-0.0632614	-0.0532738	-0.593644	BF386326	BF386326	UI-R-CA1-bbi-c-01-0-UI.s1 UI-R-CA1 Rattus norvegicus cDNA clone UI-R-CA1-bbi-c-01-0-UI 3', mRNA sequence [BF386326]	BF386326	FALSE
A_44_P544023	0.0223128	0.000432153	0.294025	0.209548	0.296918	1.019	1.36309	NM_001011995	Tuba6	Rattus norvegicus tubulin, alpha 6 (Tuba6), mRNA [NM_001011995]	NM_001011995	FALSE
A_44_P930113	0.0057074	3.13883e-05	-0.467674	0.130681	0.384928	0.157376	0.772955	DV727783	DV727783	RVL20336 Wackym-Soares normalized rat vestibular cDNA library Rattus norvegicus cDNA 5', mRNA sequence [DV727783]	DV727783	FALSE
A_44_P470892	0.00128653	1.23591e-06	-0.506112	-0.495801	0.585552	1.14	1.61489	ENSRNOT00000029787	ENSRNOT00000029787			FALSE
A_44_P1057763	0.0282544	0.000719962	-0.596688	-0.42092	0.199786	0.0137707	0.145141	NM_053576	Prdx6	Rattus norvegicus peroxiredoxin 6 (Prdx6), mRNA [NM_053576]	NM_053576	FALSE
A_43_P12236	0.0438944	0.00183504	-0.128054	0.0586038	-0.63869	-1.03817	-1.39733	NM_022521	Oat	Rattus norvegicus ornithine aminotransferase (Oat), mRNA [NM_022521]	NM_022521	FALSE
A_44_P1007561	0.011615	0.00011596	-0.291477	-0.0456191	-0.152974	0.253913	0.623566	NM_213563	Vars2l	Rattus norvegicus valyl-tRNA synthetase 2-like (Vars2l), mRNA [NM_213563]	NM_213563	FALSE
A_44_P1034155	0.0358995	0.0011714	-0.71892	-0.565678	-0.402547	0.081164	0.327571	XM_001073018	LOC686234	PREDICTED: Rattus norvegicus similar to Peptide chain release factor 1, mitochondrial precursor (MRF-1) (LOC686234), mRNA [XM_001073018]	XM_001073018	FALSE
A_43_P13030	0.0116682	0.000119053	-0.724369	-0.0476758	0.540497	-0.00968397	0.307092	XM_341091	Fbxo21_predicted	PREDICTED: Rattus norvegicus F-box only protein 21 (predicted) (Fbxo21_predicted), mRNA [XM_341091]	XM_341091	FALSE
A_44_P178519	0.0263407	0.000609868	-0.228368	-0.623553	-0.0282091	-0.583205	-1.23059	NM_001047101	Adamts7_predicted	Rattus norvegicus a disintegrin-like and metallopeptidase (reprolysin type) with thrombospondin type 1 motif, 7 (predicted) (Adamts7_predicted), mRNA [NM_001047101]	NM_001047101	FALSE
A_42_P489223	0.0137182	0.000170935	-0.0323457	-0.0306537	0.00146925	0.481942	1.05495	ENSRNOT00000038246	RGD1560519_predicted	Q7TPV7_MOUSE (Q7TPV7) Thada protein, partial (28%) [TC597325]		FALSE
A_44_P421547	0.0146915	0.000203267	0.0906414	0.523174	1.17882	0.572001	0.433718	NM_053295	Cast	Rattus norvegicus calpastatin (Cast), transcript variant 1, mRNA [NM_053295]	NM_053295	FALSE
A_44_P222511	0.00203963	3.00226e-06	0.0496961	-0.0995176	0.68699	0.895538	1.22559	XR_007989	RGD1562936_predicted	PREDICTED: Rattus norvegicus similar to Heat shock protein HSP 90-beta (HSP 84) (predicted) (RGD1562936_predicted), mRNA [XR_007989]	XR_007989	FALSE
A_43_P17681	0.00762448	5.17531e-05	-0.00444865	0.176731	-0.0623521	0.410712	1.37405	NM_001012143	Ptdsr	Rattus norvegicus phosphatidylserine receptor (Ptdsr), mRNA [NM_001012143]	NM_001012143	FALSE
A_44_P205301	0.0389354	0.00136968	-0.616352	-0.543566	-1.49351	-0.361346	0.369091	NM_183402	Grinl1a	Rattus norvegicus glutamate receptor, ionotropic, N-methyl D-aspartate-like 1A (Grinl1a), mRNA [NM_183402]	NM_183402	FALSE
A_42_P554295	0.0419303	0.00163818	-0.138385	0.689045	1.16423	0.615816	0.508134	ENSRNOT00000044552	RGD1561393_predicted	Q2LD37_HUMAN (Q2LD37) Fragile site-associated protein, partial (5%) [TC613495]		FALSE
A_44_P262025	0.0207727	0.000371377	-0.547193	-0.466254	0.0635446	0.204717	0.340848	AF391798	Gtf3a	Rattus norvegicus transcription factor IIIA mRNA, partial cds [AF391798]	AF391798	FALSE
A_44_P328535	0.014606	0.000201121	0.312455	0.164058	-0.0302757	0.645433	1.03103	XR_005506	LOC362250	PREDICTED: Rattus norvegicus similar to Glyceraldehyde-3-phosphate dehydrogenase (GAPDH) (LOC362250), mRNA [XR_005506]	XR_005506	FALSE
A_44_P427067	0.0419303	0.00165567	0.0107335	0.173163	0.00718701	0.406559	0.718706	ENSRNOT00000013114	ENSRNOT00000013114	39S ribosomal protein L10, mitochondrial precursor (L10mt) (MRP-L10) (MRP-L8). [Source:Uniprot/SWISSPROT;Acc:P0C2C4] [ENSRNOT00000013114]		FALSE
A_43_P20550	0.0279287	0.000703692	-0.143769	0.300474	-0.00144339	0.269764	0.930874	NM_001009676	RGD1305833	Rattus norvegicus similar to RIKEN cDNA 2700067D09 (RGD1305833), mRNA [NM_001009676]	NM_001009676	FALSE
A_42_P519018	0.0421475	0.0016878	-0.408381	-0.0455391	0.0933613	0.167988	0.416153	NM_001005761	Mtmr9	Rattus norvegicus myotubularin related protein 9 (Mtmr9), mRNA [NM_001005761]	NM_001005761	FALSE
A_44_P863709	0.0156109	0.000229054	-1.20357	-0.380595	0.0738445	-0.989295	-1.09127	AW143870	AW143870	AW143870 EST294166 Normalized rat embryo, Bento Soares Rattus sp. cDNA clone RGICB87 5' end, mRNA sequence [AW143870]	AW143870	FALSE
A_44_P1033758	0.0184777	0.000304486	-0.456169	-0.521782	-0.466952	0.105327	1.06871	XM_001060069	Wdr36_predicted	PREDICTED: Rattus norvegicus WD repeat domain 36 (predicted) (Wdr36_predicted), mRNA [XM_001060069]	XM_001060069	FALSE
A_43_P22310	0.0204984	0.000362397	0.0748766	-0.0946838	-0.250168	0.514302	1.14447	ENSRNOT00000009180	RGD1304624_predicted	PREDICTED: Rattus norvegicus similar to RIKEN cDNA 2700097O09 (predicted) (RGD1304624_predicted), mRNA [XM_234159]		FALSE
A_42_P652202	0.0232645	0.000483145	-0.472368	-0.262196	-0.0819989	0.0957004	0.502171	NM_031654	Rabggta	Rattus norvegicus Rab geranylgeranyl transferase, a subunit (Rabggta), mRNA [NM_031654]	NM_031654	FALSE
A_44_P304402	0.0274226	0.000677742	-0.4789	-0.213707	-0.077382	0.0253078	0.393034	NM_031137	Tpp2	Rattus norvegicus tripeptidyl peptidase II (Tpp2), mRNA [NM_031137]	NM_031137	FALSE
A_44_P297645	0.0279148	0.000700704	-0.575793	-0.0931513	-0.0525826	0.103773	0.37249	ENSRNOT00000021052	Zswim3_predicted	Rattus norvegicus zinc finger, SWIM domain containing 3 (predicted), mRNA (cDNA clone IMAGE:7313947), with apparent retained intron [BC091328]		FALSE
A_44_P160888	0.00759224	5.10719e-05	-0.551466	-0.549588	-0.183204	0.212072	0.745727	NM_172045	Ppp1r14b	Rattus norvegicus protein phosphatase 1, regulatory (inhibitor) subunit 14B (Ppp1r14b), mRNA [NM_172045]	NM_172045	FALSE
A_44_P143922	0.0441691	0.00189099	0.282208	0.44136	1.1551	0.812902	-0.281202	NM_001013179	Hes6	Rattus norvegicus hairy and enhancer of split 6 (Drosophila) (Hes6), mRNA [NM_001013179]	NM_001013179	FALSE
A_43_P20449	0.0261872	0.000600963	0.103443	0.238347	0.0346032	0.457947	0.714535	ENSRNOT00000000246	RGD1310180	PREDICTED: Rattus norvegicus similar to hypothetical protein FLJ12681 (RGD1310180), mRNA [XM_340769]		FALSE
A_44_P473098	0.0157608	0.000231965	-0.16464	-0.0315858	-0.141038	-0.640616	-1.26999	ENSRNOT00000031129	ENSRNOT00000031129	Histone H4 [Contains: Osteogenic growth peptide (OGP)]. [Source:Uniprot/SWISSPROT;Acc:P62804] [ENSRNOT00000031129]		FALSE
A_44_P282872	0.0393392	0.00142004	0.000516415	-0.52966	-0.353955	-0.749537	-0.776339	AA996805	AA996805	AA996805 UI-R-C0-hh-h-01-0-UI.s1 UI-R-C0 Rattus norvegicus cDNA clone UI-R-C0-hh-h-01-0-UI 3', mRNA sequence [AA996805]	AA996805	FALSE
A_44_P270854	0.00941282	8.1167e-05	-0.55593	-0.128047	-0.115728	0.421997	0.721919	DY314346	DY314346	AGENCOURT_66949338 NIH_MGC_366 Rattus norvegicus cDNA clone IMAGE:8370437 5', mRNA sequence [DY314346]	DY314346	FALSE
A_42_P634930	0.00128653	1.38286e-06	-0.0978962	-0.030261	0.675951	0.775344	1.32797	NM_175578	Dscr1l1	Rattus norvegicus Down syndrome critical region gene 1-like 1 (Dscr1l1), mRNA [NM_175578]	NM_175578	FALSE
A_44_P311468	0.0156057	0.000227344	-0.464373	-0.114563	-0.0657724	0.102436	0.541045	NM_152847	Snx27	Rattus norvegicus sorting nexin family member 27 (Snx27), mRNA [NM_152847]	NM_152847	FALSE
A_44_P219628	0.0142914	0.000189692	-0.414696	-0.431202	0.0764905	0.657615	0.640736	NM_053840	Ggt1	Rattus norvegicus gamma-glutamyltransferase 1 (Ggt1), mRNA [NM_053840]	NM_053840	FALSE
A_44_P492053	0.0104379	9.89595e-05	-0.0308455	0.198147	-0.153308	0.524519	1.51146	ENSRNOT00000017342	Gtf2h1_predicted	PREDICTED: Rattus norvegicus general transcription factor II H, polypeptide 1 (predicted) (Gtf2h1_predicted), mRNA [XM_341863]		FALSE
A_44_P163189	0.0279287	0.000706099	0.00429916	0.474326	0.657282	0.665252	0.913126	NM_178345	Stxbp5	Rattus norvegicus syntaxin binding protein 5 (tomosyn) (Stxbp5), transcript variant b, mRNA [NM_178345]	NM_178345	FALSE
A_44_P370722	0.0222621	0.000428887	-0.0650159	-0.0876874	-0.400468	0.0959697	0.906611	ENSRNOT00000008775	Mlh3_predicted	Rattus norvegicus similar to DNA mismatch repair protein Mlh3 (MutL protein homolog 3) (LOC314320), mRNA [XM_234420]		FALSE
A_44_P824706	0.0270224	0.000653906	0.581982	-0.188643	-0.110581	-0.34011	-0.383869	TC637109	TC637109	Q44YW6_9BURK (Q44YW6) Protein-glutamate methylesterase , partial (3%) [TC637109]		FALSE
A_43_P22663	0.0268798	0.000634678	-0.390639	-0.511726	-0.208238	0.763964	1.85733	ENSRNOT00000020823	Il17rb_predicted	PREDICTED: Rattus norvegicus interleukin 17 receptor B (predicted) (Il17rb_predicted), mRNA [XM_224604]		FALSE
A_42_P829349	0.048032	0.00237208	-0.653154	-0.305145	0.652393	0.290598	0.436165	ENSRNOT00000018897	Comtd1_predicted	PREDICTED: Rattus norvegicus catechol-O-methyltransferase domain containing 1 (predicted) (Comtd1_predicted), mRNA [XM_223785]		FALSE
A_44_P362158	0.0371706	0.00126699	-0.484529	-0.189531	0.251959	0.0398134	0.190569	ENSRNOT00000003834	ENSRNOT00000003834	PREDICTED: Rattus norvegicus RNA binding motif protein 25 (predicted) (Rbm25_predicted), mRNA [XM_345703]		FALSE
A_44_P990937	0.0437871	0.00182265	-0.112955	0.23552	0.149264	0.351175	1.00161	ENSRNOT00000060927	ENSRNOT00000060927	Brahma protein (Fragment). [Source:Uniprot/SPTREMBL;Acc:Q63071] [ENSRNOT00000060927]		FALSE
A_44_P884800	0.0478307	0.00230838	-0.12249	-0.00544333	0.54032	0.436712	0.675522	XM_238429	RGD1566169_predicted	PREDICTED: Rattus norvegicus similar to Hypothetical protein MGC37938 (predicted) (RGD1566169_predicted), mRNA [XM_238429]	XM_238429	FALSE
A_44_P387246	0.0123461	0.000142133	-0.582385	0.340953	0.867083	0.0784507	-0.0872906	ENSRNOT00000041686	Sin3a_predicted	Rattus norvegicus similar to mSin3A (LOC363067), mRNA [XM_343395]		FALSE
A_43_P21574	0.0158027	0.000233707	-0.468053	-0.324261	-0.121545	-0.0174012	0.829312	NM_001012043	Tdrd3	Rattus norvegicus tudor domain containing 3 (Tdrd3), mRNA [NM_001012043]	NM_001012043	FALSE
A_44_P318843	0.014606	0.000200254	-0.164312	-0.0911377	-0.337111	0.174967	1.06249	ENSRNOT00000016302	Prmt5_predicted	PREDICTED: Rattus norvegicus protein arginine N-methyltransferase 5 (predicted) (Prmt5_predicted), mRNA [XM_344405]		FALSE
A_44_P349148	0.0444789	0.0019157	-0.340177	-0.130026	0.175305	0.359091	0.334627	NM_001008553	Dhodh	Rattus norvegicus dihydroorotate dehydrogenase (Dhodh), mRNA [NM_001008553]	NM_001008553	FALSE
A_44_P868381	0.0328558	0.000967134	-0.586209	-0.355011	-0.10443	-0.0010134	0.267385	TC612350	TC612350	DDX49_MOUSE (Q4FZF3) Probable ATP-dependent RNA helicase DDX49 (DEAD box protein 49) , partial (32%) [TC612350]		FALSE
A_44_P342451	0.0176243	0.00028167	-0.0951586	-0.184478	-0.269973	0.0104713	1.02293	NM_001033063	Rpp38	Rattus norvegicus ribonuclease P/MRP 38 subunit (human) (Rpp38), mRNA [NM_001033063]	NM_001033063	FALSE
A_44_P435751	0.0243078	0.000524467	-0.46243	0.553253	1.44142	0.371077	0.208976	NM_053436	Stau1	Rattus norvegicus staufen RNA binding protein homolog 1 (Drosophila) (Stau1), mRNA [NM_053436]	NM_053436	FALSE
A_44_P316342	0.0274226	0.000680923	-0.196496	-0.708786	-0.408969	-0.213292	0.474276	NM_001037194	Det1	Rattus norvegicus de-etiolated homolog 1 (Arabidopsis) (Det1), mRNA [NM_001037194]	NM_001037194	FALSE
A_44_P442371	0.0268046	0.000630429	0.15204	0.0184121	0.345006	0.670058	1.10525	NM_139261	Hspbp1	Rattus norvegicus hsp70-interacting protein (Hspbp1), mRNA [NM_139261]	NM_139261	FALSE
A_42_P794149	0.0461206	0.00210574	-0.256071	0.0746825	0.766682	0.130798	-0.201535	AA848230	AA848230	AA848230 EST190990 Normalized rat heart, Bento Soares Rattus sp. cDNA clone RHEAC26 5' end, mRNA sequence [AA848230]	AA848230	FALSE
A_42_P724535	0.0380637	0.00132321	-0.0801225	-0.0530695	-0.0474266	0.13215	0.558454	NM_001007747	Pomgnt1	Rattus norvegicus protein O-linked mannose beta1,2-N-acetylglucosaminyltransferase (Pomgnt1), mRNA [NM_001007747]	NM_001007747	FALSE
A_44_P445090	0.0413288	0.00158463	-0.12924	-0.00893235	0.562565	0.375374	0.504578	NM_199118	Gaa	Rattus norvegicus glucosidase, alpha, acid (Gaa), mRNA [NM_199118]	NM_199118	FALSE
A_42_P594008	0.0486348	0.00242625	-0.364319	-0.615524	-0.76478	-0.211786	0.699514	NM_133609	Eif2b3	Rattus norvegicus eukaryotic translation initiation factor 2B, subunit 3 gamma (Eif2b3), mRNA [NM_133609]	NM_133609	FALSE
A_44_P515461	0.0419303	0.00165437	0.022209	-0.0556567	-0.0126096	0.480121	0.798594	NM_171990	Bpnt1	Rattus norvegicus bisphosphate 3'-nucleotidase 1 (Bpnt1), mRNA [NM_171990]	NM_171990	FALSE
A_44_P306639	0.00488813	1.96408e-05	-0.680021	-0.406172	-0.146001	0.0976242	0.796052	NM_022526	Dap	Rattus norvegicus death-associated protein (Dap), mRNA [NM_022526]	NM_022526	FALSE
A_44_P461085	0.0161211	0.000240954	-0.135292	0.125929	0.0277972	0.3674	1.13642	ENSRNOT00000017342	Gtf2h1_predicted	PREDICTED: Rattus norvegicus general transcription factor II H, polypeptide 1 (predicted) (Gtf2h1_predicted), mRNA [XM_341863]		FALSE
A_43_P14683	0.0452888	0.00202828	-0.229593	0.0704029	0.552711	0.356842	0.544866	NM_001024790	Usp7	Rattus norvegicus ubiquitin specific protease 7 (herpes virus-associated) (Usp7), mRNA [NM_001024790]	NM_001024790	FALSE
A_44_P424379	0.0401386	0.00150044	-0.2556	-0.408355	-0.490275	0.0815355	0.581162	ENSRNOT00000015562	Usp39_predicted	PREDICTED: Rattus norvegicus ubiquitin specific protease 39 (predicted) (Usp39_predicted), mRNA [XM_216173]		FALSE
A_44_P440466	0.048032	0.00236942	-0.223411	-0.582063	-0.750315	-0.102533	0.586471	AF041106	Garnl1	Rattus norvegicus tulip 1 mRNA, complete cds. [AF041106]	AF041106	FALSE
A_44_P280659	0.0440506	0.00185786	0.256405	0.439089	0.645783	0.865833	1.4437	ENSRNOT00000007323	RGD1305110_predicted	Rattus norvegicus similar to KIAA1841 protein (predicted), mRNA (cDNA clone MGC:156804 IMAGE:7133856), complete cds [BC128776]		FALSE
A_44_P224568	0.042535	0.00172453	-0.336083	-0.238126	-0.617997	-0.177398	0.521579	NM_058210	Sf1	Rattus norvegicus splicing factor 1 (Sf1), mRNA [NM_058210]	NM_058210	FALSE
A_44_P402641	0.00759224	5.04578e-05	-0.6749	-0.182593	0.357198	0.25194	0.612843	NM_201423	Ugt1a2	Rattus norvegicus UDP glycosyltransferase 1 family polypeptide A2 (Ugt1a2), mRNA [NM_201423]	NM_201423	FALSE
A_44_P442733	0.0126322	0.000147708	0.0464874	0.339821	0.582995	0.258268	0.997196	NM_022386	Mafg	Rattus norvegicus v-maf musculoaponeurotic fibrosarcoma oncogene family, protein G (avian) (Mafg), mRNA [NM_022386]	NM_022386	FALSE
A_44_P716307	0.0471032	0.00222013	-0.142165	0.0119025	0.25895	0.0484596	0.885255	TC616294	TC616294			FALSE
A_44_P512136	0.0120248	0.000132948	0.195364	0.30541	0.476065	0.939107	1.26937	NM_022389	Dhcr7	Rattus norvegicus 7-dehydrocholesterol reductase (Dhcr7), mRNA [NM_022389]	NM_022389	FALSE
A_44_P542762	0.0461206	0.00210718	0.0643908	-0.147573	-0.0533668	0.388554	0.823148	CF976565	MGC72932	F27G05_035.ab1.R Rat retinal ganglion cell Rattus norvegicus cDNA, mRNA sequence [CF976565]	CF976565	FALSE
A_44_P525519	0.0269468	0.000642399	-0.439939	-0.555841	-0.242015	-0.0283426	0.514417	NM_001034922	Atad3a	Rattus norvegicus ATPase family, AAA domain containing 3A (Atad3a), mRNA [NM_001034922]	NM_001034922	FALSE
A_44_P321761	0.014606	0.000196726	-0.395076	0.243962	0.651722	0.179415	-0.0944939	BF550393	BF550393	BF550393 UI-R-A1-ef-g-01-0-UI.r1 UI-R-A1 Rattus norvegicus cDNA clone UI-R-A1-ef-g-01-0-UI 5', mRNA sequence [BF550393]	BF550393	FALSE
A_42_P599210	0.0118963	0.000123918	-0.23409	-0.331507	0.105546	0.647302	0.832542	NM_001008326	Rexo2	Rattus norvegicus REX2, RNA exonuclease 2 homolog (S. cerevisiae) (Rexo2), mRNA [NM_001008326]	NM_001008326	FALSE
A_44_P288536	0.0374109	0.00128193	0.0414287	0.133553	0.461399	0.896135	0.930535	ENSRNOT00000045060	ENSRNOT00000045060	similar to ribosomal protein L22 like 1 (LOC365655), mRNA [Source:RefSeq_dna;Acc:XR_008735] [ENSRNOT00000015756]		FALSE
A_44_P114720	0.0441691	0.00187524	0.177567	0.0593007	-0.358121	0.203679	0.971576	ENSRNOT00000014586	Adprhl2_predicted	PREDICTED: Rattus norvegicus ADP-ribosylhydrolase like 2 (predicted) (Adprhl2_predicted), mRNA [XM_342918]		FALSE
A_44_P823844	0.0429077	0.00176667	-0.128364	-0.123654	0.144257	-0.587951	-1.22485	TC613479	TC613479			FALSE
A_44_P575991	0.0462822	0.00212251	0.0163343	0.214514	0.559434	0.49253	0.882769	NM_182950	Tnfaip1	Rattus norvegicus tumor necrosis factor, alpha-induced protein 1 (endothelial) (Tnfaip1), mRNA [NM_182950]	NM_182950	FALSE
A_44_P447623	0.00092522	6.2656e-07	-0.294694	-0.402777	-0.340752	0.819226	1.80777	NM_031325	Ugdh	Rattus norvegicus UDP-glucose dehydrogenase (Ugdh), mRNA [NM_031325]	NM_031325	FALSE
A_44_P375252	0.0377976	0.00130201	-0.262078	-0.463918	-0.349654	-0.216845	0.43102	ENSRNOT00000029548	Ehmt1_predicted	Rattus norvegicus similar to RIKEN cDNA 9230102N17 (LOC362078), mRNA [XM_342379]		FALSE
A_44_P1043576	0.0398873	0.00146944	0.0251158	-0.116448	0.157443	0.269687	0.579945	ENSRNOT00000031558	RGD1559895_predicted	PREDICTED: Rattus norvegicus similar to FLJ20859 protein (predicted) (RGD1559895_predicted), mRNA [XM_223974]		FALSE
A_44_P269453	0.0465132	0.00215242	-0.278666	-0.316174	-0.102895	0.0366417	0.439487	NM_032058	Eif2b2	Rattus norvegicus eukaryotic translation initiation factor 2B, subunit 2 beta (Eif2b2), mRNA [NM_032058]	NM_032058	FALSE
A_44_P777829	0.0249583	0.000548745	-0.244259	-0.189751	0.450746	-0.0708739	0.638392	TC614037	TC614037			FALSE
A_44_P138472	0.0102515	9.36099e-05	-0.890656	0.683446	0.322981	-0.513299	-0.687449	BM383868	BM383868	BM383868 UI-R-DM1-ckc-g-06-0-UI.s1 UI-R-DM1 Rattus norvegicus cDNA clone UI-R-DM1-ckc-g-06-0-UI 3', mRNA sequence [BM383868]	BM383868	FALSE
A_44_P226759	0.0057074	2.90374e-05	-0.10003	0.0921792	0.592452	0.535003	0.927675	AY321335	Fdps	Rattus norvegicus Ac2-125 mRNA, complete cds [AY321335]	AY321335	FALSE
A_44_P505809	0.0247259	0.000538322	-0.291497	0.260882	0.128418	0.888045	1.35259	NM_212534	Mrps18b	Rattus norvegicus mitochondrial ribosomal protein S18B (Mrps18b), mRNA [NM_212534]	NM_212534	FALSE
A_44_P605947	0.0465478	0.00215893	-0.427075	-0.350335	-0.573979	-0.0110091	0.554381	NM_001044258	LOC498940	Rattus norvegicus similar to Carboxylesterase 2 (LOC498940), mRNA [NM_001044258]	NM_001044258	FALSE
A_44_P134917	0.03933	0.00141429	-0.422517	-0.0952307	-0.108088	-0.285436	0.460147	AW142508	AW142508	AW142508 EST292760 Normalized rat embryo, Bento Soares Rattus sp. cDNA clone RGIAO11 5' end, mRNA sequence [AW142508]	AW142508	FALSE
A_44_P135678	0.0274131	0.000673583	-0.190526	0.167078	0.54446	0.0902818	0.382045	ENSRNOT00000027067	RGD1305020_predicted	PREDICTED: Rattus norvegicus similar to Hepatocellular carcinoma-associated antigen 58 homolog (predicted) (RGD1305020_predicted), mRNA [XM_230785]		FALSE
A_44_P1037771	0.0238115	0.000500956	-0.583139	-0.6639	-0.0595885	-0.0825475	0.364735	ENSRNOT00000021937	Znf593_predicted	PREDICTED: Rattus norvegicus zinc finger protein 593 (predicted) (Znf593_predicted), mRNA [XM_216542]		FALSE
A_44_P499528	0.0454731	0.00205707	-0.369074	0.146675	0.515068	0.027408	0.170797	XM_236656	Tmem7_predicted	Rattus norvegicus similar to transmembrane protein 7 (LOC316018), mRNA [XM_236656]	XM_236656	FALSE
A_43_P16045	0.0161211	0.00024074	-0.226016	0.683862	1.32654	0.415469	1.70827	AB072252	AB072252	Rattus norvegicus cDNA, clone:bA7, differentially expressed in pylorus [AB072252]	AB072252	FALSE
A_44_P267255	0.00456536	1.73999e-05	-0.190606	-0.189174	-0.198788	-0.049538	0.801897	ENSRNOT00000028509	ENSRNOT00000028509	similar to RIKEN cDNA 2410004C24 (predicted) (RGD1308049_predicted), mRNA [Source:RefSeq_dna;Acc:XR_008764] [ENSRNOT00000028509]		FALSE
A_44_P411771	0.00817404	6.03761e-05	0.261552	0.220223	-0.389843	-0.802726	-0.818113	XM_001056376	LOC680262	PREDICTED: Rattus norvegicus hypothetical protein LOC680262 (LOC680262), mRNA [XM_001056376]	XM_001056376	FALSE
A_43_P14233	0.0188724	0.000324622	0.0962299	-0.132677	-0.58875	-0.736177	-0.890782	NM_022391	Pttg1	Rattus norvegicus pituitary tumor-transforming 1 (Pttg1), mRNA [NM_022391]	NM_022391	FALSE
A_44_P114638	0.00324596	9.08577e-06	-0.207819	-0.18479	-0.139604	0.348151	1.1608	NM_001014057	Tsen2	Rattus norvegicus tRNA splicing endonuclease 2 homolog (S. cerevisiae) (Tsen2), mRNA [NM_001014057]	NM_001014057	FALSE
A_44_P276784	0.0368237	0.00125226	-0.342673	-0.22226	0.00352502	0.367677	0.523656	NM_001012220	Catsper2	Rattus norvegicus cation channel, sperm associated 2 (Catsper2), mRNA [NM_001012220]	NM_001012220	FALSE
A_44_P306156	0.0419514	0.00165912	-0.263711	-0.250481	-0.114872	0.214713	0.786015	XM_001058121	RGD1560873_predicted	PREDICTED: Rattus norvegicus similar to RIKEN cDNA E230015L20 gene (predicted) (RGD1560873_predicted), mRNA [XM_001058121]	XM_001058121	FALSE
A_44_P208601	0.0245025	0.000529873	-0.544175	-0.26344	0.137064	0.0745746	0.970379	XM_230774	Myh7b_predicted	Rattus norvegicus similar to KIAA1512 protein (LOC311570), mRNA [XM_230774]	XM_230774	FALSE
A_44_P534812	0.00238709	5.22777e-06	-0.0653225	-0.211891	1.07079	1.97689	2.59032	NM_001025628	Ropn1	Rattus norvegicus ropporin, rhophilin associated protein 1 (Ropn1), mRNA [NM_001025628]	NM_001025628	FALSE
A_44_P1052934	0.0396018	0.00145177	-0.103911	0.0878122	0.486872	0.577917	0.732903	NM_001008334	Tmem97	Rattus norvegicus transmembrane protein 97 (Tmem97), mRNA [NM_001008334]	NM_001008334	FALSE
A_44_P548790	0.0464088	0.00214188	0.530236	0.151935	-0.132496	-0.155245	-0.579223	XM_235301	LOC299915	PREDICTED: Rattus norvegicus similar to lymphocyte protein tyrosine kinase (LOC299915), mRNA [XM_235301]	XM_235301	FALSE
A_44_P357358	0.0319283	0.000921092	-0.0690932	-0.219405	-0.28931	0.192971	0.832824	NM_001002253	Atp6v0e2	Rattus norvegicus ATPase, H+ transporting, V0 subunit E isoform 2 (Atp6v0e2), mRNA [NM_001002253]	NM_001002253	FALSE
A_44_P990713	0.0122637	0.00014021	-0.486944	-0.346173	0.0303671	-0.122449	0.820232	XM_343469	Rnu3ip2_predicted	PREDICTED: Rattus norvegicus RNA, U3 small nucleolar interacting protein 2 (predicted) (Rnu3ip2_predicted), mRNA [XM_343469]	XM_343469	FALSE
A_44_P445004	0.0445201	0.0019215	0.428288	0.708216	0.92197	0.259059	0.27625	NM_053424	Slc4a4	Rattus norvegicus solute carrier family 4, member 4 (Slc4a4), mRNA [NM_053424]	NM_053424	FALSE
A_44_P276778	0.0335809	0.00100061	-0.685766	-0.467982	-0.421657	-0.139364	0.261886	ENSRNOT00000019025	ENSRNOT00000019025	PREDICTED: Rattus norvegicus transformation related protein 53 binding protein 1 (predicted) (Trp53bp1_predicted), mRNA [XM_215812]		FALSE
A_42_P767698	0.0253713	0.000564698	-0.285257	-0.451201	-0.189491	0.249655	0.646658	NM_001008721	Ebna1bp2	Rattus norvegicus EBNA1 binding protein 2 (Ebna1bp2), mRNA [NM_001008721]	NM_001008721	FALSE
A_44_P264460	0.03898	0.00137893	-0.0352399	0.133175	0.381955	0.837349	1.12614	NM_177419	Xrcc5	Rattus norvegicus X-ray repair complementing defective repair in Chinese hamster cells 5 (Xrcc5), mRNA [NM_177419]	NM_177419	FALSE
A_44_P224744	0.0282544	0.00072071	-0.100942	0.0255917	0.150862	0.561072	0.851122	ENSRNOT00000023626	ENSRNOT00000023626	PREDICTED: Rattus norvegicus U1 small nuclear ribonucleoprotein 1C (predicted) (Snrp1c_predicted), mRNA [XM_342101]		FALSE
A_44_P202988	0.0290924	0.000774003	-0.0718511	-0.396871	-0.653059	0.571722	0.961088	NM_012615	Odc1	Rattus norvegicus ornithine decarboxylase 1 (Odc1), mRNA [NM_012615]	NM_012615	FALSE
A_44_P166406	0.011615	0.000116859	-0.935795	-0.924222	-0.181607	-0.193156	-0.023288	XM_216567	RGD1311709_predicted	PREDICTED: Rattus norvegicus similar to ribosomal protein P0-like protein; 60S acidic ribosomal protein PO; ribosomal protein, large, P0-like (predicted) (RGD1311709_predicted), mRNA [XM_216567]	XM_216567	FALSE
A_42_P608325	0.00941282	8.07883e-05	0.00360119	0.542253	1.09103	0.342778	0.497146	ENSRNOT00000006034	Brd1_predicted	PREDICTED: Rattus norvegicus bromodomain containing 1 (predicted) (Brd1_predicted), mRNA [XM_235552]		FALSE
A_44_P1015203	0.0478307	0.00229567	-0.0749544	0.247446	0.643021	0.851791	1.20726	XM_574740	RGD1562732_predicted	PREDICTED: Rattus norvegicus similar to Glutathione S-transferase, theta 3 (predicted) (RGD1562732_predicted), mRNA [XM_574740]	XM_574740	FALSE
A_42_P612449	0.0419303	0.00163696	-0.170623	0.012203	0.543011	-0.00988066	-0.14936	NM_024153	Fdxr	Rattus norvegicus ferredoxin reductase (Fdxr), mRNA [NM_024153]	NM_024153	FALSE
A_44_P994732	0.00820425	6.11151e-05	0.264888	-0.0964603	0.230234	0.553015	1.01684	ENSRNOT00000026146	RGD1310609_predicted	PREDICTED: Rattus norvegicus similar to hypothetical protein BC011981 (predicted) (RGD1310609_predicted), mRNA [XM_215064]		FALSE
A_44_P134496	0.0337435	0.00100989	-0.27644	-0.199304	-0.230547	-0.224813	1.52772	AA997849	AA997849	UI-R-C0-hu-b-07-0-UI.s1 UI-R-C0 Rattus norvegicus cDNA clone UI-R-C0-hu-b-07-0-UI 3', mRNA sequence [AA997849]	AA997849	FALSE
A_44_P375031	0.0310863	0.000868732	-0.223132	-0.558584	-0.126548	-0.0116284	0.0712904	XR_006964	LOC365166	PREDICTED: Rattus norvegicus similar to Putative methyltransferase WBSCR22 (Williams-Beuren syndrome chromosome region 22 protein homolog) (LOC365166), mRNA [XR_006964]	XR_006964	FALSE
A_44_P976893	0.000751521	3.67441e-07	-0.233543	-0.0755782	0.771326	0.796641	1.60968	BF551334	BF551334	UI-R-C0-im-d-06-0-UI.r1 UI-R-C0 Rattus norvegicus cDNA clone UI-R-C0-im-d-06-0-UI 5', mRNA sequence [BF551334]	BF551334	FALSE
A_42_P817417	0.0426493	0.00175026	0.128431	0.122617	-0.0500742	0.174279	1.1483	NM_017076	PVR	Rattus norvegicus poliovirus receptor (PVR), mRNA [NM_017076]	NM_017076	FALSE
A_42_P794613	0.0452092	0.00198685	-0.0129117	0.28011	1.16719	0.906149	0.656651	NM_031062	Mvd	Rattus norvegicus mevalonate (diphospho) decarboxylase (Mvd), mRNA [NM_031062]	NM_031062	FALSE
A_44_P1071355	0.00245316	5.7591e-06	-0.115269	0.0374057	0.340361	0.379095	1.06919	NM_001034146	Usp10	Rattus norvegicus ubiquitin specific protease 10 (Usp10), mRNA [NM_001034146]	NM_001034146	FALSE
A_44_P288058	0.0261273	0.000595157	0.151659	0.323558	0.480101	0.676255	1.20299	NM_001081974	Klc1	Rattus norvegicus kinesin light chain 1 (Klc1), transcript variant C, mRNA [NM_001081974]	NM_001081974	FALSE
A_44_P228874	0.00344874	1.07433e-05	-0.353035	-0.0105916	-0.094981	0.67711	1.90952	NM_012815	Gclc	Rattus norvegicus glutamate-cysteine ligase, catalytic subunit (Gclc), mRNA [NM_012815]	NM_012815	FALSE
A_44_P430027	0.044043	0.00185169	-1.16409	-0.862704	-0.408049	-1.23456	-1.63005	AI233208	AI233208	AI233208 EST229896 Normalized rat kidney, Bento Soares Rattus sp. cDNA clone RKIDC22 3' end, mRNA sequence [AI233208]	AI233208	FALSE
A_44_P427523	0.0349865	0.00109145	-0.461052	-0.465158	0.370728	0.0578223	0.275176	NM_057140	Ppp2r1a	Rattus norvegicus protein phosphatase 2 (formerly 2A), regulatory subunit A (PR 65), alpha isoform (Ppp2r1a), mRNA [NM_057140]	NM_057140	FALSE
A_44_P718178	0.0356172	0.00113874	-0.385999	-0.532391	-0.0620406	0.416605	0.417847	TC601688	TC601688			FALSE
A_44_P255771	0.0388979	0.00135923	-0.0343742	-0.617931	-0.981691	-0.300441	0.249256	ENSRNOT00000006599	LOC683898	PREDICTED: Rattus norvegicus similar to XPA binding protein 1 (LOC688393), mRNA [XM_001066740]		FALSE
A_43_P16644	0.0269913	0.000649006	-0.80934	-0.868965	-1.19344	-0.413011	0.334865	NM_001025402	Umps	Rattus norvegicus uridine monophosphate synthetase (Umps), mRNA [NM_001025402]	NM_001025402	FALSE
A_44_P530196	0.00871867	7.16388e-05	-0.425638	-0.328361	-0.888926	-1.34261	-1.46817	ENSRNOT00000038176	ENSRNOT00000038176	PREDICTED: Rattus norvegicus antigen identified by monoclonal antibody Ki-67 (predicted) (Mki67_predicted), mRNA [XM_225460]		FALSE
A_44_P823212	0.0446864	0.00193675	0.343815	0.233464	0.357827	0.522081	1.44616	TC588121	TC588121			FALSE
A_44_P480504	0.00574478	3.32425e-05	0.1625	-0.218957	0.492514	0.912253	1.30054	XM_345216	XM_345216	Rattus norvegicus similar to Ab2-162 (LOC365803), mRNA [XM_345216]	XM_345216	FALSE
A_43_P22269	0.011615	0.000116558	0.272193	-0.52837	-0.350704	-0.285548	-0.574766	ENSRNOT00000042638	LOC362845	PREDICTED: Rattus norvegicus similar to zinc finger protein 709 (LOC362845), mRNA [XM_343177]		FALSE
A_44_P103832	0.0422759	0.0017063	-1.13024	-0.908661	-0.339493	-1.18258	-1.28878	NM_012963	Hmgb1	Rattus norvegicus high mobility group box 1 (Hmgb1), mRNA [NM_012963]	NM_012963	FALSE
A_44_P118929	0.0422317	0.0016988	0.425819	0.214731	0.567695	0.682568	1.11649	NM_030989	Tp53	Rattus norvegicus tumor protein p53 (Tp53), mRNA [NM_030989]	NM_030989	FALSE
A_44_P112981	0.00203963	3.10817e-06	-0.490543	-0.145951	0.202153	0.38826	1.1829	NM_031668	Mybbp1a	Rattus norvegicus MYB binding protein (P160) 1a (Mybbp1a), mRNA [NM_031668]	NM_031668	FALSE
A_44_P193221	0.0439577	0.00184166	-0.111333	0.0524352	0.700231	0.49467	0.659297	CK471009	CK471009	AGENCOURT_17644485 NIH_MGC_237 Rattus norvegicus cDNA clone IMAGE:7115651 5', mRNA sequence [CK471009]	CK471009	FALSE
A_44_P168569	0.029016	0.000766673	-0.864692	-0.299413	0.597716	-0.305365	-0.397319	NM_001035255	LOC502603	Rattus norvegicus similar to splicing factor p54 (LOC502603), mRNA [NM_001035255]	NM_001035255	FALSE
A_44_P793224	0.010262	9.49754e-05	-0.268849	0.423612	1.34389	0.329746	0.132649	ENSRNOT00000017391	RGD1564560_predicted	PREDICTED: Rattus norvegicus similar to RCK (predicted) (RGD1564560_predicted), mRNA [XM_576400]		FALSE
A_44_P531142	0.0261872	0.000601773	-0.564479	0.289407	1.64953	0.502838	-0.0114117	BE109637	BE109637	BE109637 UI-R-BJ1-avq-d-11-0-UI.s1 UI-R-BJ1 Rattus norvegicus cDNA clone UI-R-BJ1-avq-d-11-0-UI 3', mRNA sequence [BE109637]	BE109637	FALSE
A_42_P550914	0.036384	0.0012024	-0.312861	-0.252278	0.118837	-0.554805	-1.46405	NM_212507	Ltb	Rattus norvegicus lymphotoxin B (Ltb), mRNA [NM_212507]	NM_212507	FALSE
A_44_P132754	0.0401386	0.00149425	-0.109716	0.0372067	0.735504	0.540338	0.575861	NM_212510	MGC72957	Rattus norvegicus similar to 60S ribosomal protein L18a (MGC72957), mRNA [NM_212510]	NM_212510	FALSE
A_44_P179787	0.000136518	2.46533e-08	-0.26782	0.0744863	0.998565	1.22248	2.30699	NM_199409	Panx2	Rattus norvegicus pannexin 2 (Panx2), mRNA [NM_199409]	NM_199409	FALSE
A_42_P606504	0.0356172	0.00114475	-0.0966284	-0.0465236	0.0803486	0.0780306	0.686686	ENSRNOT00000008071	Stk35_predicted	PREDICTED: Rattus norvegicus serine [XM_230598]		FALSE
A_44_P207369	0.03933	0.00141482	-1.43553	-1.266	-0.485385	-1.47287	-1.36032	BE113217	BE113217	BE113217 UI-R-BJ1-awc-h-09-0-UI.s1 UI-R-BJ1 Rattus norvegicus cDNA clone UI-R-BJ1-awc-h-09-0-UI 3', mRNA sequence [BE113217]	BE113217	FALSE
A_44_P103544	0.0142914	0.000188811	-0.379149	-0.414993	-0.457398	-0.0245605	0.714538	CO574689	CO574689	AGENCOURT_28449258 NIH_MGC_248 Rattus norvegicus cDNA clone IMAGE:7364971 5', mRNA sequence [CO574689]	CO574689	FALSE
A_44_P175875	0.049098	0.00246242	-0.162856	-0.0404395	0.00657249	0.304781	0.771687	NM_001010966	Pigv	Rattus norvegicus phosphatidylinositol glycan, class V (Pigv), mRNA [NM_001010966]	NM_001010966	FALSE
A_43_P20314	0.0441652	0.00186654	-0.297269	0.234442	0.621646	-0.0711634	-0.201883	CB545650	CB545650	AMGNNUC:MRBE3-00097-C1-A rat brain E15 (10374) Rattus norvegicus cDNA clone mrbe3-00097-c1 5', mRNA sequence [CB545650]	CB545650	FALSE
A_42_P572725	1.46285e-07	6.60428e-12	-1.5673	-0.608996	1.63594	1.5974	2.18069	NM_080581	Abcc3	Rattus norvegicus ATP-binding cassette, sub-family C (CFTR/MRP), member 3 (Abcc3), mRNA [NM_080581]	NM_080581	FALSE
A_44_P1014619	0.0212391	0.00039045	-0.909107	-0.860816	-0.110775	0.00286388	0.4886	NM_001006956	Katnal1	Rattus norvegicus katanin p60 subunit A-like 1 (Katnal1), mRNA [NM_001006956]	NM_001006956	FALSE
A_44_P431154	0.0419895	0.00166857	-0.630205	-0.50052	0.149552	-0.0160134	0.0249013	ENSRNOT00000050912	RGD1564862_predicted	PREDICTED: Rattus norvegicus similar to hypothetical protein MGC51082 (predicted) (RGD1564862_predicted), mRNA [XM_341801]		FALSE
A_44_P1002360	0.014606	0.000196057	-0.668594	-0.664118	0.220742	0.773066	1.4794	NM_175757	Cryl1	Rattus norvegicus crystallin, lamda 1 (Cryl1), mRNA [NM_175757]	NM_175757	FALSE
A_44_P322518	0.024167	0.000518227	-0.135604	-0.468779	-0.484591	0.622476	1.1664	NM_001033684	Cct6a	Rattus norvegicus chaperonin subunit 6a (zeta) (Cct6a), mRNA [NM_001033684]	NM_001033684	FALSE
A_43_P18033	0.0129925	0.000158652	0.0951486	0.378658	0.932736	0.122038	-0.330105	NM_001014007	LOC306766	Rattus norvegicus hypothetical LOC306766 (LOC306766), mRNA [NM_001014007]	NM_001014007	FALSE
A_43_P13378	0.00203963	3.59122e-06	-0.764668	-0.461481	-0.616591	-1.93908	-2.8005	NM_139258	Bmf	Rattus norvegicus Bcl2 modifying factor (Bmf), mRNA [NM_139258]	NM_139258	FALSE
A_43_P10353	0.00841708	6.49806e-05	-0.317653	0.275095	0.733225	0.56673	0.879658	ENSRNOT00000040029	ENSRNOT00000040029	PREDICTED: Rattus norvegicus eukaryotic translation initiation factor 4 gamma, 1 (Eif4g1), mRNA [XM_213569]		FALSE
A_42_P643574	0.0320119	0.000925027	-0.569182	-0.30403	0.0835447	0.130504	0.522587	ENSRNOT00000018809	Aaas_predicted	PREDICTED: Rattus norvegicus achalasia, adrenocortical insufficiency, alacrimia (Allgrove, triple-A) (predicted) (Aaas_predicted), mRNA [XM_217063]		FALSE
A_44_P416761	0.0118963	0.000124474	-0.650405	-0.288282	0.236696	0.317669	0.543461	NM_001002016	Lmna	Rattus norvegicus lamin A (Lmna), transcript variant 2, mRNA [NM_001002016]	NM_001002016	FALSE
A_44_P261599	0.0340844	0.00102638	-0.89628	-0.313794	0.0989252	-0.255065	-0.313761	AA997406	AA997406	AA997406 UI-R-C0-hr-e-04-0-UI.s1 UI-R-C0 Rattus norvegicus cDNA clone UI-R-C0-hr-e-04-0-UI 3', mRNA sequence [AA997406]	AA997406	FALSE
A_44_P356679	0.0243078	0.000524566	-0.790484	-0.514506	-0.0535783	-0.226908	0.36944	XM_342932	Atpbd1b_predicted	PREDICTED: Rattus norvegicus ATP binding domain 1 family, member B (predicted) (Atpbd1b_predicted), mRNA [XM_342932]	XM_342932	FALSE
A_44_P239122	0.0473723	0.00224992	-0.0838777	0.0149157	0.200214	0.22734	0.738985	NM_147209	Ppm1g	Rattus norvegicus protein phosphatase 1G (formerly 2C), magnesium-dependent, gamma isoform (Ppm1g), mRNA [NM_147209]	NM_147209	FALSE
A_44_P388782	0.021826	0.000407944	0.148865	0.0408041	0.318374	0.593017	1.13127	NM_053593	Cdk4	Rattus norvegicus cyclin-dependent kinase 4 (Cdk4), mRNA [NM_053593]	NM_053593	FALSE
A_44_P361202	0.00567834	2.6828e-05	0.0242271	0.0316386	0.56866	1.07866	1.33364	ENSRNOT00000040366	ENSRNOT00000040366	similar to ribosomal protein L22 like 1 (LOC365655), mRNA [Source:RefSeq_dna;Acc:XR_008735] [ENSRNOT00000015756]		FALSE
A_44_P182792	0.0356172	0.00114471	-0.108151	0.0973721	0.631442	0.659566	0.932862	NM_001037180	Fkbp8	Rattus norvegicus FK506 binding protein 8 (Fkbp8), mRNA [NM_001037180]	NM_001037180	FALSE
A_44_P242329	0.00941282	8.07457e-05	-0.05205	0.0901296	0.492552	0.892271	1.63202	NM_130433	Acaa2	Rattus norvegicus acetyl-Coenzyme A acyltransferase 2 (mitochondrial 3-oxoacyl-Coenzyme A thiolase) (Acaa2), mRNA [NM_130433]	NM_130433	FALSE
A_42_P589680	0.0452888	0.00201571	-0.251798	-0.277888	0.114264	0.200775	0.43903	NM_001034941	Tarbp2	Rattus norvegicus TAR (HIV) RNA binding protein 2 (Tarbp2), mRNA [NM_001034941]	NM_001034941	FALSE
A_44_P993027	0.0322233	0.000935421	-0.0422642	0.23194	-0.115596	-0.688093	-1.07051	NM_017060	Hrasls3	Rattus norvegicus HRAS like suppressor 3 (Hrasls3), mRNA [NM_017060]	NM_017060	FALSE
A_42_P560984	0.044714	0.00194946	-0.296212	0.0649676	0.626674	0.348595	0.407322	ENSRNOT00000059467	RGD1565641_predicted	PREDICTED: Rattus norvegicus RGD1565641 (predicted) (RGD1565641_predicted), mRNA [XM_574891]		FALSE
A_44_P456933	0.00128653	1.2584e-06	0.320986	0.138185	0.300914	1.23879	2.08861	XR_007066	LOC691340	PREDICTED: Rattus norvegicus similar to stress-induced phosphoprotein 1 (LOC691340), mRNA [XR_007066]	XR_007066	FALSE
A_44_P408887	0.0462822	0.00212229	-0.525233	-0.0724082	0.569889	-0.12173	-0.104442	NM_133560	Trak2	Rattus norvegicus trafficking protein, kinesin binding 2 (Trak2), mRNA [NM_133560]	NM_133560	FALSE
A_44_P270843	0.0340844	0.00102377	-1.51742	-0.931187	0.127141	-0.826293	-1.27209	AA997175	AA997175	AA997175 UI-R-C0-hs-f-05-0-UI.s1 UI-R-C0 Rattus norvegicus cDNA clone UI-R-C0-hs-f-05-0-UI 3', mRNA sequence [AA997175]	AA997175	FALSE
A_42_P722409	0.0129177	0.000153819	0.343198	0.111606	-0.135523	1.12161	1.74672	NM_001004252	Farslb	Rattus norvegicus phenylalanine-tRNA synthetase-like, beta subunit (Farslb), mRNA [NM_001004252]	NM_001004252	FALSE
A_44_P281297	0.0318442	0.00091598	0.188606	0.169044	-0.0936604	0.48253	1.26946	ENSRNOT00000014859	Ranbp5_predicted	PREDICTED: Rattus norvegicus RAN binding protein 5 (predicted) (Ranbp5_predicted), mRNA [XM_224534]		FALSE
A_44_P1017890	0.0307048	0.000853913	0.159358	0.141669	0.46346	0.498443	0.672975	NM_001007000	Pcgf1	Rattus norvegicus polycomb group ring finger 1 (Pcgf1), mRNA [NM_001007000]	NM_001007000	FALSE
A_44_P244668	0.0269468	0.000644776	-0.0653781	0.231827	0.325591	0.839629	1.50454	NM_019158	Aqp8	Rattus norvegicus aquaporin 8 (Aqp8), mRNA [NM_019158]	NM_019158	FALSE
A_44_P303044	0.0221352	0.00041972	0.132476	0.639897	1.14569	0.649806	0.95772	ENSRNOT00000016759	Supt6h	Supt6h protein (Fragment). [Source:Uniprot/SPTREMBL;Acc:Q4G018] [ENSRNOT00000016759]		FALSE
A_44_P542535	0.0122637	0.000139645	-0.800241	-0.234761	0.41511	-0.478134	-0.402813	AA925831	AA925831	AA925831 UI-R-A1-et-b-08-0-UI.s1 UI-R-A1 Rattus norvegicus cDNA clone UI-R-A1-et-b-08-0-UI 3' similar to gi [AA925831]	AA925831	FALSE
A_44_P370240	0.0364991	0.0012202	-0.294318	0.700488	1.18309	0.155474	0.235209	ENSRNOT00000001334	Ncor2_predicted	PREDICTED: Rattus norvegicus nuclear receptor co-repressor 2 (predicted) (Ncor2_predicted), mRNA [XM_341072]		FALSE
A_44_P121374	0.00330208	9.39191e-06	-0.12097	-0.421609	-0.17557	0.783252	1.59454	NM_001011901	Hsph1	Rattus norvegicus heat shock 105kDa/110kDa protein 1 (Hsph1), mRNA [NM_001011901]	NM_001011901	FALSE
A_44_P369847	0.03898	0.0013797	-0.0376457	0.259043	0.241141	0.334699	0.963117	NM_057152	Keap1	Rattus norvegicus Kelch-like ECH-associated protein 1 (Keap1), mRNA [NM_057152]	NM_057152	FALSE
A_44_P189859	0.0454445	0.00205071	-0.0768642	0.43542	1.09881	0.402257	0.0631629	NM_001012094	Zfp297b	Rattus norvegicus zinc finger protein 297B (Zfp297b), mRNA [NM_001012094]	NM_001012094	FALSE
A_44_P396496	0.0129177	0.000153962	-0.13839	-0.203112	0.495295	0.544058	1.25376	XM_001064248	LOC685545	PREDICTED: Rattus norvegicus hypothetical protein LOC685545 (LOC685545), mRNA [XM_001064248]	XM_001064248	FALSE
A_44_P245391	0.0364991	0.00123092	-0.129	-0.605547	-1.04646	0.0177963	0.677673	NM_019356	Eif2s1	Rattus norvegicus eukaryotic translation initiation factor 2, subunit 1 alpha (Eif2s1), mRNA [NM_019356]	NM_019356	FALSE
A_44_P868092	0.0419303	0.0016472	-0.0214363	-0.0810254	0.34812	0.719108	1.09587	ENSRNOT00000026920	ENSRNOT00000026920	Heat shock protein HSP 90-beta (HSP 84). [Source:Uniprot/SWISSPROT;Acc:P34058] [ENSRNOT00000026920]		FALSE
A_44_P494250	0.0261872	0.000600197	0.182215	0.195019	0.168052	-0.301887	-0.909192	ENSRNOT00000051095	ENSRNOT00000051095	Histone H4 [Contains: Osteogenic growth peptide (OGP)]. [Source:Uniprot/SWISSPROT;Acc:P62804] [ENSRNOT00000051095]		FALSE
A_44_P543473	0.0300575	0.000825054	-0.733947	-0.679665	-0.177657	-0.636833	-0.155754	XM_001075705	LOC686781	PREDICTED: Rattus norvegicus similar to NFkB interacting protein 1 (LOC686781), mRNA [XM_001075705]	XM_001075705	FALSE
A_44_P254767	0.00239977	5.52544e-06	-0.39774	-0.0123773	0.750373	0.729398	0.989972	NM_012962	Gss	Rattus norvegicus glutathione synthetase (Gss), mRNA [NM_012962]	NM_012962	FALSE
A_44_P216654	0.0346603	0.00107502	0.27682	0.0744457	0.257994	0.695783	1.25894	NM_053561	Nap1l1	Rattus norvegicus nucleosome assembly protein 1-like 1 (Nap1l1), mRNA [NM_053561]	NM_053561	FALSE
A_43_P17109	0.0204984	0.000361222	-0.281445	-0.11502	-0.42168	0.416963	1.06373	NM_212520	Tomm40	Rattus norvegicus translocase of outer mitochondrial membrane 40 homolog (yeast) (Tomm40), mRNA [NM_212520]	NM_212520	FALSE
A_44_P946478	0.0191254	0.000330701	-0.221746	0.0601482	0.0806876	0.098398	0.60946	TC620765	TC620765			FALSE
A_44_P452527	0.0182036	0.00029586	0.0115504	-0.0742211	0.763248	0.938425	1.28942	A_44_P452527	A_44_P452527			FALSE
A_44_P742272	0.0364991	0.00122856	0.0410746	0.021373	-0.253248	-0.764241	-1.34988	NM_022686	Hist1h4b	Rattus norvegicus histone cluster 1, H4b (Hist1h4b), mRNA [NM_022686]	NM_022686	FALSE
A_44_P555561	0.0247489	0.000542708	-0.441155	-0.24439	-0.219469	-0.0722737	0.779918	XM_001073038	LOC691729	PREDICTED: Rattus norvegicus similar to spermatogenesis associated 5-like 1, transcript variant 2 (LOC691729), mRNA [XM_001073038]	XM_001073038	FALSE
A_44_P1039927	0.0466854	0.00217092	-0.627491	0.0230131	0.401129	-0.00371468	0.142455	NM_001014088	RGD1307401	Rattus norvegicus similar to RIKEN cDNA 2310005P05 (RGD1307401), mRNA [NM_001014088]	NM_001014088	FALSE
A_44_P221287	0.0146915	0.000204288	-1.30424	-0.73572	-0.304031	-0.415492	-0.0902078	BC089922	Cc2d1b	Rattus norvegicus coiled-coil and C2 domain containing 1B, mRNA (cDNA clone IMAGE:7306876), complete cds. [BC089922]	BC089922	FALSE
A_44_P1021682	0.0481221	0.00238112	-0.00438869	0.378736	0.644638	0.236302	0.050452	NM_001004446	Smarca2	Rattus norvegicus SWI/SNF related, matrix associated, actin dependent regulator of chromatin, subfamily a, member 2 (Smarca2), mRNA [NM_001004446]	NM_001004446	FALSE
A_44_P173622	0.00456536	1.75194e-05	-0.609455	-0.487922	-0.177163	0.0619276	0.717994	NM_001013966	LOC303067	Rattus norvegicus similar to hypothetical protein FLJ20546 (LOC303067), mRNA [NM_001013966]	NM_001013966	FALSE
A_44_P959674	0.0390735	0.00138785	-0.0632247	-0.77096	-0.1886	0.454048	0.626165	A_44_P959674	A_44_P959674			FALSE
A_44_P359074	0.015193	0.000216327	0.489683	-0.146641	-0.137084	0.477315	0.842295	XR_007049	LOC314605	PREDICTED: Rattus norvegicus similar to glyceraldehyde-3-phosphate dehydrogenase (LOC314605), mRNA [XR_007049]	XR_007049	FALSE
A_44_P945383	0.0419303	0.00165639	-0.671856	-0.511214	-0.109005	-0.225146	0.161033	TC582824	TC582824	Q24497_DROME (Q24497) Bkm protein (Fragment), partial (37%) [TC582824]		FALSE
A_44_P786613	0.0364991	0.00121772	-0.162749	-0.0209279	0.146712	0.32005	0.75002	AW920454	AW920454	AW920454 EST351758 Rat gene index, normalized rat, norvegicus, Bento Soares Rattus norvegicus cDNA clone RGIGW44 5' end, mRNA sequence [AW920454]	AW920454	FALSE
A_43_P12332	0.0393392	0.00142279	-0.956538	-0.98213	-0.654643	-0.689873	0.122577	NM_022869	Nolc1	Rattus norvegicus nucleolar and coiled-body phosphoprotein 1 (Nolc1), mRNA [NM_022869]	NM_022869	FALSE
A_44_P225204	0.0342225	0.00104454	0.208131	0.317347	0.330724	0.839958	1.47214	NM_001013218	Reep6	Rattus norvegicus receptor accessory protein 6 (Reep6), mRNA [NM_001013218]	NM_001013218	FALSE
A_44_P522859	0.0452888	0.00202472	-0.639999	-0.203713	-0.0799143	0.0286725	0.646286	ENSRNOT00000054674	Sfxn4_predicted	PREDICTED: Rattus norvegicus sideroflexin 4 (predicted) (Sfxn4_predicted), mRNA [XM_342072]		FALSE
A_44_P993577	0.0499255	0.00254699	-0.673606	-0.355271	0.012252	-0.0620354	0.253631	XM_214633	RGD1560538_predicted	PREDICTED: Rattus norvegicus similar to hypothetical protein FLJ21148 (predicted) (RGD1560538_predicted), mRNA [XM_214633]	XM_214633	FALSE
A_44_P607486	0.0454445	0.00205048	-0.0940706	0.406809	0.556638	-0.133547	-0.289836	ENSRNOT00000006604	Ches1_predicted	PREDICTED: Rattus norvegicus checkpoint suppressor 1 (predicted) (Ches1_predicted), mRNA [XM_234377]		FALSE
A_42_P781735	0.0465478	0.00216032	-0.120651	-0.306306	0.172597	0.45742	0.593235	NM_053319	Dynll1	Rattus norvegicus dynein light chain LC8-type 1 (Dynll1), mRNA [NM_053319]	NM_053319	FALSE
A_44_P426919	0.0184911	0.000307545	-0.159141	-0.297833	-0.323245	0.179343	0.800221	XM_345601	XM_345601	Rattus norvegicus similar to fertilization antigen-1; FA-1 (LOC366501), mRNA [XM_345601]	XM_345601	FALSE
A_43_P15730	0.0118963	0.000124765	-0.500046	-0.297623	-0.0923954	-0.148997	0.364662	NM_001025271	Sfpq	Rattus norvegicus splicing factor proline/glutamine rich (polypyrimidine tract binding protein associated) (Sfpq), mRNA [NM_001025271]	NM_001025271	FALSE
A_42_P475759	0.0183737	0.000300504	0.0215217	0.232868	0.316438	0.767506	1.19027	ENSRNOT00000014780	Gars	Gars protein (Fragment). [Source:Uniprot/SPTREMBL;Acc:Q5I0G4] [ENSRNOT00000014780]		FALSE
A_44_P994512	0.0334534	0.000995107	-0.262399	0.0862091	0.772324	0.49741	0.557659	ENSRNOT00000019814	Sympk	Sympk protein (Fragment). [Source:Uniprot/SPTREMBL;Acc:Q561R4] [ENSRNOT00000019814]		FALSE
A_44_P961053	0.0209905	0.000380957	-0.193012	-0.248984	-0.22596	0.200486	0.727886	TC607290	TC607290			FALSE
A_42_P581567	0.0184911	0.000307657	0.0942087	0.0302645	-0.226651	0.486458	1.17513	ENSRNOT00000061322	Gart	Gart protein. [Source:Uniprot/SPTREMBL;Acc:Q5PPK3] [ENSRNOT00000061322]		FALSE
A_44_P559348	0.0231146	0.000468553	-0.391567	-0.204275	-0.0137886	0.225114	0.720217	NM_001031640	Eif3s9	Rattus norvegicus eukaryotic translation initiation factor 3, subunit 9 (eta) (Eif3s9), mRNA [NM_001031640]	NM_001031640	FALSE
A_43_P21419	0.00871867	7.13e-05	0.16187	0.00166857	0.0280535	0.762114	1.32221	ENSRNOT00000006139	Alg12_predicted	PREDICTED: Rattus norvegicus asparagine-linked glycosylation 12 homolog (yeast, alpha-1,6-mannosyltransferase) (predicted) (Alg12_predicted), mRNA [XM_235555]		FALSE
A_44_P391784	0.041788	0.00162247	0.0898329	-0.0904436	0.176014	0.738057	1.09028	XM_229115	RGD1563524_predicted	PREDICTED: Rattus norvegicus similar to 60 kDa heat shock protein, mitochondrial precursor (Hsp60) (predicted) (RGD1563524_predicted), mRNA [XM_229115]	XM_229115	FALSE
A_44_P684770	0.0391365	0.00139584	-0.0315766	0.866143	1.29296	0.433463	0.273345	TC589877	TC589877			FALSE
A_44_P529947	0.020667	0.000368078	-0.742237	0.587582	1.66052	0.232177	-0.0464729	ENSRNOT00000013804	Kif3b_predicted	Rattus norvegicus similar to Kinesin-like protein KIF3B (Microtubule plus end-directed kinesin motor 3B) (LOC296284), mRNA [XM_215883]		FALSE
A_44_P548590	0.015193	0.000216749	0.155055	0.00877047	0.260745	0.571808	1.06042	NM_001007715	Ribc1	Rattus norvegicus RIB43A domain with coiled-coils 1 (Ribc1), mRNA [NM_001007715]	NM_001007715	FALSE
A_44_P359113	0.048032	0.0023695	-0.37424	-0.344169	0.20278	-1.11161	-1.49824	XM_236596	RGD1564060_predicted	PREDICTED: Rattus norvegicus similar to procollagen, type VI, alpha 3 isoform 4 (predicted) (RGD1564060_predicted), mRNA [XM_236596]	XM_236596	FALSE
A_44_P218284	0.0478307	0.00234295	0.0390186	0.17186	0.50841	0.542677	0.844584	ENSRNOT00000055194	RGD1560049_predicted	Rattus norvegicus membrane protein, palmitoylated 3 (MAGUK p55 subfamily member 3) (Mpp3), mRNA [XM_340911]		FALSE
A_44_P998998	0.0497121	0.00252039	-0.142864	-0.0754681	0.282833	0.343732	0.659656	NM_031981	Nsfl1c	Rattus norvegicus NSFL1 (p97) cofactor (p47) (Nsfl1c), mRNA [NM_031981]	NM_031981	FALSE
A_44_P197896	0.03933	0.00141341	-0.311009	-0.332168	-0.107691	0.23761	0.57119	ENSRNOT00000003448	Kifap3_predicted	AW141860 EST291975 Normalized rat ovary, Bento Soares Rattus sp. cDNA clone RGICL37 5' end similar to kinesin-associated protein KAP3 splice form A, mRNA sequence [AW141860]		FALSE
A_44_P578847	0.0464088	0.0021434	-0.676453	-0.345764	0.118111	-0.912181	-0.472096	TC613955	TC613955			FALSE
A_44_P161797	0.0161211	0.000241634	-0.284675	-0.0780029	0.701748	0.403453	0.473539	ENSRNOT00000051347	RGD1308012_predicted	PREDICTED: Rattus norvegicus similar to RIKEN cDNA A630054L15; hypothetical protein MGC38041 (predicted) (RGD1308012_predicted), mRNA [XM_343313]		FALSE
A_43_P11936	0.0490896	0.00245559	-0.445018	-0.306486	-0.42157	-0.0738033	0.388613	M83677	Rab10	RATRAB10X Sprague-Dawley (clone LRB3) RAB10 mRNA, complete cds [M83677]	M83677	FALSE
A_44_P518523	0.048032	0.00236839	-0.501619	-0.214326	0.10361	0.345732	0.38153	ENSRNOT00000021685	Ankrd39_predicted	PREDICTED: Rattus norvegicus ankyrin repeat domain 39 (predicted) (Ankrd39_predicted), mRNA [XM_346038]		FALSE
A_42_P624333	0.0102515	9.30544e-05	-0.236726	0.00467539	0.411928	0.563719	0.873762	NM_134407	Akr7a2	Rattus norvegicus aldo-keto reductase family 7, member A2 (aflatoxin aldehyde reductase) (Akr7a2), mRNA [NM_134407]	NM_134407	FALSE
A_44_P166233	0.0374109	0.00127904	-0.0199155	-0.00752568	0.35588	0.463516	0.776723	ENSRNOT00000048310	ENSRNOT00000048310	similar to Glyceraldehyde-3-phosphate dehydrogenase (GAPDH) (LOC307263), mRNA [Source:RefSeq_dna;Acc:XR_007312] [ENSRNOT00000048310]		FALSE
A_43_P14482	0.0282843	0.000724028	-0.241712	-0.290542	0.225818	0.414725	0.808686	NM_199099	Impdh2	Rattus norvegicus inosine 5-monophosphate dehydrogenase 2 (Impdh2), mRNA [NM_199099]	NM_199099	FALSE
A_44_P1042535	0.0410107	0.00155156	-1.27869	-0.93819	0.168248	-0.579427	-0.801947	AI236795	AI236795	AI236795 EST233357 Normalized rat ovary, Bento Soares Rattus sp. cDNA clone ROVDK61 3' end, mRNA sequence [AI236795]	AI236795	FALSE
A_44_P1047710	0.0373077	0.00127335	0.00307798	-0.0650433	0.0410908	0.0605885	0.763131	A_44_P1047710	A_44_P1047710			FALSE
A_44_P302734	0.0231485	0.000471855	-0.498859	0.0093137	0.673454	0.187766	0.0760883	AW918794	AW918794	AW918794 EST350098 Rat gene index, normalized rat, norvegicus, Bento Soares Rattus norvegicus cDNA clone RGIEY31 5' end, mRNA sequence [AW918794]	AW918794	FALSE
A_42_P546266	0.0271541	0.000659544	-0.189417	-0.176765	0.309144	0.360669	0.48667	ENSRNOT00000024113	Ercc1_predicted	PREDICTED: Rattus norvegicus excision repair cross-complementing rodent repair deficiency, complementation group 1 (predicted) (Ercc1_predicted), mRNA [XM_214833]		FALSE
A_44_P609103	0.00683489	4.24626e-05	-0.440019	-0.174966	0.312159	0.522026	0.9351	TC638722	TC638722	KCNN1_RAT (P70606) Small conductance calcium-activated potassium channel protein 1 (SK1), complete [TC638722]		FALSE
A_44_P230219	0.00347131	1.09703e-05	0.220559	0.355729	0.545526	0.83973	1.41048	CV119657	CV119657	AGENCOURT_31539770 NIH_MGC_270 Rattus norvegicus cDNA clone IMAGE:7445129 5', mRNA sequence [CV119657]	CV119657	FALSE
A_44_P1058703	0.00896768	7.45277e-05	-0.587856	-0.370354	-0.102082	-0.0666457	0.524591	BC092633	RGD1307526	Rattus norvegicus similar to modulator of estrogen induced transcription, mRNA (cDNA clone MGC:109335 IMAGE:7314918), complete cds. [BC092633]	BC092633	FALSE
A_44_P134070	0.000751521	3.73216e-07	-0.176597	-0.0479958	-0.0974888	0.508015	2.30448	NM_031614	Txnrd1	Rattus norvegicus thioredoxin reductase 1 (Txnrd1), mRNA [NM_031614]	NM_031614	FALSE
A_44_P174374	0.0146915	0.000203894	-0.498939	-0.564751	0.0782534	1.08894	1.98438	NM_012844	Ephx1	Rattus norvegicus epoxide hydrolase 1, microsomal (Ephx1), transcript variant 2, mRNA [NM_012844]	NM_012844	FALSE
A_44_P863259	0.00344429	1.01841e-05	-0.469714	-0.0133594	0.156127	-0.131758	0.371747	XR_008228	RGD1566399_predicted	PREDICTED: Rattus norvegicus similar to MYST histone acetyltransferase monocytic leukemia 4 (predicted) (RGD1566399_predicted), mRNA [XR_008228]	XR_008228	FALSE
A_43_P21781	0.0378407	0.00131033	-0.856602	-0.955184	-0.673545	-0.131592	0.181802	NM_001013866	RGD1309437	Rattus norvegicus similar to RIKEN cDNA 2610528E23 (RGD1309437), mRNA [NM_001013866]	NM_001013866	FALSE
A_44_P405655	0.0102515	9.35278e-05	-0.752841	-0.525327	-0.128296	-0.212969	0.407652	NM_001025036	LOC499339	Rattus norvegicus hypothetical protein LOC499339 (LOC499339), mRNA [NM_001025036]	NM_001025036	FALSE
A_44_P177742	0.0349174	0.00108457	-0.357917	-0.137812	0.0935639	0.145346	0.542656	NM_031596	Sart1	Rattus norvegicus squamous cell carcinoma antigen recognized by T-cells 1 (Sart1), mRNA [NM_031596]	NM_031596	FALSE
A_42_P694171	0.0118963	0.000123466	-0.706627	-0.843495	-0.659985	0.168616	0.586781	NM_175707	Ppil3	Rattus norvegicus peptidylprolyl isomerase (cyclophilin)-like 3 (Ppil3), mRNA [NM_175707]	NM_175707	FALSE
A_44_P475804	0.00668886	4.07673e-05	-0.0440304	0.200954	0.696101	0.689334	0.992413	A_44_P475804	A_44_P475804			FALSE
A_44_P519698	0.0358995	0.0011799	-0.469347	-0.0525072	0.477016	0.000219226	0.00304818	AW914793	AW914793	AW914793 EST346097 Normalized rat ovary, Bento Soares Rattus sp. cDNA clone RGIBH40 5' end, mRNA sequence [AW914793]	AW914793	FALSE
A_43_P17852	0.011615	0.000117415	-0.234092	-0.116998	0.561035	0.356469	0.610956	XM_575603	RGD1560552_predicted	PREDICTED: Rattus norvegicus similar to MJ0495-like protein SelB (predicted) (RGD1560552_predicted), mRNA [XM_575603]	XM_575603	FALSE
A_42_P533219	0.0326179	0.000954238	0.36684	0.114302	-0.269329	0.364779	0.574302	ENSRNOT00000007919	Slc30a6_predicted	PREDICTED: Rattus norvegicus solute carrier family 30 (zinc transporter), member 6 (predicted) (Slc30a6_predicted), mRNA [XM_216643]		FALSE
A_44_P399249	0.0119399	0.000130559	-0.379465	-0.364866	-0.350115	0.11744	1.08639	NM_031659	Tgm1	Rattus norvegicus transglutaminase 1 (Tgm1), mRNA [NM_031659]	NM_031659	FALSE
A_44_P302225	0.0263407	0.000610059	-0.511562	-0.626729	-0.977081	-0.587674	0.213776	NM_153309	Mina	Rattus norvegicus myc induced nuclear antigen (Mina), mRNA [NM_153309]	NM_153309	FALSE
A_43_P11035	0.0482055	0.00238857	-0.929312	-0.733043	-0.332312	-0.24741	-0.19206	TC591599	TC591599			FALSE
A_44_P619150	0.0269468	0.000643744	-0.781446	-0.315409	-0.0324081	-0.0067476	0.0561652	AW144111	AW144111	AW144111 EST294407 Normalized rat embryo, Bento Soares Rattus sp. cDNA clone RGICI34 5' end, mRNA sequence [AW144111]	AW144111	FALSE
A_44_P591437	0.0247489	0.000543024	-0.132356	0.00442135	0.0851806	0.237451	0.777892	NM_001031653	Polr3d	Rattus norvegicus polymerase (RNA) III (DNA directed) polypeptide D (Polr3d), mRNA [NM_001031653]	NM_001031653	FALSE
A_43_P16457	0.0473483	0.0022445	0.0253161	-0.169832	0.00955212	1.15186	1.29613	NM_001037208	Creld2	Rattus norvegicus cysteine-rich with EGF-like domains 2 (Creld2), mRNA [NM_001037208]	NM_001037208	FALSE
A_44_P820184	0.0340954	0.0010313	-0.590639	0.0194447	0.466236	-0.13969	-0.101122	AI030973	AI030973	AI030973 UI-R-C0-jf-h-03-0-UI.s1 UI-R-C0 Rattus norvegicus cDNA clone UI-R-C0-jf-h-03-0-UI 3', mRNA sequence [AI030973]	AI030973	FALSE
A_44_P387780	0.0356172	0.00114586	0.873996	0.923352	0.745357	1.77887	2.14625	NM_031241	Cyp8b1	Rattus norvegicus cytochrome P450, family 8, subfamily b, polypeptide 1 (Cyp8b1), mRNA [NM_031241]	NM_031241	FALSE
A_44_P210791	0.0478307	0.00233489	-0.180966	-0.554474	-0.530214	-0.082741	0.385164	ENSRNOT00000020181	Ash2l_predicted	PREDICTED: Rattus norvegicus ash2 (absent, small, or homeotic)-like (Drosophila) (predicted) (Ash2l_predicted), mRNA [XM_001062523]		FALSE
A_44_P448645	0.00428813	1.58748e-05	-0.365684	-0.19071	0.00677192	0.2074	0.741494	NM_001007707	Brp16	Rattus norvegicus brain protein 16 (Brp16), mRNA [NM_001007707]	NM_001007707	FALSE
A_44_P210736	0.00239977	5.4224e-06	-0.0459336	-0.439198	0.150567	0.730681	1.05971	XR_007818	RGD1563527_predicted	PREDICTED: Rattus norvegicus similar to Ran-interacting protein MOG1 (predicted) (RGD1563527_predicted), mRNA [XR_007818]	XR_007818	FALSE
A_44_P333165	0.00655515	3.96564e-05	-0.333101	-0.215495	-0.08529	0.184505	0.787076	NM_001014153	RGD1304869_predicted	Rattus norvegicus similar to arginine N-methyltransferase p82 isoform (predicted) (RGD1304869_predicted), mRNA [NM_001014153]	NM_001014153	FALSE
A_44_P161535	0.0464893	0.00214921	-0.156148	-0.181772	0.555734	0.375774	0.375391	XR_006585	LOC364882	PREDICTED: Rattus norvegicus similar to ribosomal protein L13 (LOC364882), mRNA [XR_006585]	XR_006585	FALSE
A_44_P337615	0.0102515	9.31964e-05	-0.111742	0.0288363	0.354015	0.464741	0.795813	NM_001012154	Tbrg4	Rattus norvegicus transforming growth factor beta regulated gene 4 (Tbrg4), mRNA [NM_001012154]	NM_001012154	FALSE
A_42_P755546	0.0463103	0.00212839	-0.039754	0.00992179	0.126937	0.592425	0.748706	NM_001017489	LOC498225	Rattus norvegicus similar to ligatin (LOC498225), mRNA [NM_001017489]	NM_001017489	FALSE
A_44_P138269	0.0318117	0.000900494	-0.143195	0.148301	0.319275	0.509499	0.970485	NM_001025703	RGD1305776	Rattus norvegicus similar to D15Wsu75e protein (RGD1305776), mRNA [NM_001025703]	NM_001025703	FALSE
A_44_P121935	0.00128653	1.45207e-06	-0.544213	-0.293426	0.188783	0.314215	0.685138	BC092573	Hdac10	Rattus norvegicus histone deacetylase 10, mRNA (cDNA clone MGC:108767 IMAGE:7323327), complete cds. [BC092573]	BC092573	FALSE
A_44_P473515	0.011615	0.000117469	-0.410939	-0.286432	-0.0629804	-0.0540081	0.973612	ENSRNOT00000029704	ENSRNOT00000029704	Rattus norvegicus cDNA clone IMAGE:7304370, with apparent retained intron [BC089098]		FALSE
A_44_P485640	0.00486257	1.93186e-05	0.0502204	0.183526	0.983433	0.87198	1.14989	ENSRNOT00000042056	RGD1565459_predicted	PREDICTED: Rattus norvegicus similar to ribosomal protein L10a (predicted) (RGD1565459_predicted), mRNA [XM_001081626]		FALSE
A_44_P1014786	0.0354835	0.00111497	-0.927677	-0.311613	0.116864	-0.835041	-0.869623	ENSRNOT00000026631	Rsbn1_predicted	PREDICTED: Rattus norvegicus rosbin, round spermatid basic protein 1 (predicted) (Rsbn1_predicted), mRNA [XM_227540]		FALSE
A_44_P604882	0.043473	0.00180374	-0.0821821	0.600653	1.1363	0.769736	0.752635	AI548777	AI548777	UI-R-C3-tr-e-05-0-UI.s1 UI-R-C3 Rattus norvegicus cDNA clone UI-R-C3-tr-e-05-0-UI 3', mRNA sequence [AI548777]	AI548777	FALSE
A_44_P222481	0.0114987	0.000111612	-0.0142082	0.263753	0.572088	0.963576	1.20103	ENSRNOT00000023286	Mrps27_predicted	PREDICTED: Rattus norvegicus mitochondrial ribosomal protein S27 (predicted) (Mrps27_predicted), mRNA [XM_342180]		FALSE
A_43_P13041	0.0464088	0.00214024	-0.556453	-0.0695667	1.00457	0.147389	-1.0472	NM_057133	Nr0b2	Rattus norvegicus nuclear receptor subfamily 0, group B, member 2 (Nr0b2), mRNA [NM_057133]	NM_057133	FALSE
A_42_P673309	0.0184505	0.000303205	-1.2952	-1.04709	-0.496116	-0.105024	0.0272504	NM_001037788	Styxl1	Rattus norvegicus serine/threonine/tyrosine interacting-like 1 (Styxl1), mRNA [NM_001037788]	NM_001037788	FALSE
A_44_P218014	0.024167	0.000517266	-0.482555	-0.657444	-1.16828	-0.197045	0.296427	NM_147177	Ruvbl1	Rattus norvegicus RuvB-like protein 1 (Ruvbl1), mRNA [NM_147177]	NM_147177	FALSE
A_44_P1017536	0.042535	0.00172606	-0.158441	0.491452	0.851341	0.196515	0.351109	NM_199119	Ddx24	Rattus norvegicus DEAD (Asp-Glu-Ala-Asp) box polypeptide 24 (Ddx24), mRNA [NM_199119]	NM_199119	FALSE
A_44_P508711	0.048032	0.00236822	-0.0633625	-0.0954218	0.0359552	0.388784	0.769754	XM_215628	XM_215628	Rattus norvegicus similar to Pp591-pending protein (LOC295249), mRNA [XM_215628]	XM_215628	FALSE
A_44_P732751	0.0364991	0.00122903	0.143261	0.00341213	-0.090798	0.735624	1.1801	A_44_P732751	A_44_P732751			FALSE
A_43_P17082	0.0275635	0.000686909	0.169759	0.249468	-0.0892882	0.251848	0.992514	ENSRNOT00000038879	Dnajb1_predicted	PREDICTED: Rattus norvegicus DnaJ (Hsp40) homolog, subfamily B, member 1 (predicted) (Dnajb1_predicted), mRNA [XM_341663]		FALSE
A_44_P215794	0.044714	0.0019459	-0.317751	-0.606266	-0.738016	0.208926	0.746953	NM_001005905	Cct2	Rattus norvegicus chaperonin containing TCP1, subunit 2 (beta) (Cct2), mRNA [NM_001005905]	NM_001005905	FALSE
A_44_P481927	0.0231956	0.000475495	-1.53062	-1.1982	-0.256567	-1.01617	-0.8539	AI169631	AI169631	AI169631 EST215518 Normalized rat kidney, Bento Soares Rattus sp. cDNA clone RKIBV45 3' end, mRNA sequence [AI169631]	AI169631	FALSE
A_44_P408050	0.0182726	0.000297806	-0.332438	0.0687616	0.643467	0.652118	0.988815	ENSRNOT00000010601	Ckap4_predicted	PREDICTED: Rattus norvegicus cytoskeleton-associated protein 4 (predicted) (Ckap4_predicted), mRNA [XM_343189]		FALSE
A_44_P384628	0.0120248	0.000133006	0.888796	0.551052	0.717155	1.50063	2.00027	XR_006708	LOC291871	PREDICTED: Rattus norvegicus similar to heat shock protein 1, beta (LOC291871), mRNA [XR_006708]	XR_006708	FALSE
A_44_P258912	0.0223543	0.000435001	0.221124	0.273241	-0.0619752	0.210923	1.06104	NM_012495	Aldoa	Rattus norvegicus aldolase A (Aldoa), mRNA [NM_012495]	NM_012495	FALSE
A_44_P606742	0.0420494	0.00167628	-0.909538	-0.533011	0.0511745	-0.0865542	0.0300331	XM_344995	Osbp_predicted	PREDICTED: Rattus norvegicus oxysterol binding protein (predicted) (Osbp_predicted), mRNA [XM_344995]	XM_344995	FALSE
A_44_P880146	0.041788	0.00162154	-0.583095	-0.520435	-0.5748	-0.236721	0.419729	BG666928	BG666928	DRACQH11 Rat DRG Library Rattus norvegicus cDNA clone DRACQH11 5', mRNA sequence [BG666928]	BG666928	FALSE
A_44_P850918	0.0318442	0.00091376	-0.198894	-0.48857	-0.146662	0.210492	0.781887	AW142569	AW142569	AW142569 EST292821 Normalized rat embryo, Bento Soares Rattus sp. cDNA clone RGIAP78 5' end, mRNA sequence [AW142569]	AW142569	FALSE
A_44_P483032	0.024167	0.000518254	-0.129937	-0.0806016	-0.196419	0.3203	0.936565	ENSRNOT00000006365	Ftsj1_predicted	PREDICTED: Rattus norvegicus Ftsj homolog 1 (E. coli) (predicted) (Ftsj1_predicted), mRNA [XM_343771]		FALSE
A_44_P1051316	0.0358995	0.00117081	-0.823207	-0.5822	-0.27461	-0.0821615	0.149253	TC583811	TC583811	Q5XIE0_RAT (Q5XIE0) Acidic (Leucine-rich) nuclear phosphoprotein 32 family, member E (Predicted), complete [TC583811]		FALSE
A_44_P226500	0.0457192	0.00207852	-0.607929	-0.231781	0.0681704	0.0240542	0.100621	CK600897	CK600897	AGENCOURT_17890971 NIH_MGC_238 Rattus norvegicus cDNA clone IMAGE:7132856 5', mRNA sequence [CK600897]	CK600897	FALSE
A_44_P224853	0.0232645	0.000482878	-0.0454016	0.891917	1.77543	0.805206	0.381518	ENSRNOT00000036791	ENSRNOT00000036791	PREDICTED: Rattus norvegicus similar to DKFZP564P1916 protein (predicted) (RGD1311704_predicted), mRNA [XM_345033]		FALSE
A_44_P852414	0.033039	0.000975242	0.0106125	-0.240027	-0.31348	0.174874	0.936755	XR_005507	LOC500205	PREDICTED: Rattus norvegicus similar to polypyrimidine tract binding protein 1 isoform b (LOC500205), mRNA [XR_005507]	XR_005507	FALSE
A_44_P159040	0.0318087	0.000898972	-0.178263	0.186136	0.869006	0.323985	0.315691	NM_053549	Vegfb	Rattus norvegicus vascular endothelial growth factor B (Vegfb), mRNA [NM_053549]	NM_053549	FALSE
A_44_P335656	0.00501034	2.10366e-05	-0.545014	-0.0450166	0.070419	0.261496	0.824494	ENSRNOT00000009746	RGD1565311_predicted	PREDICTED: Rattus norvegicus similar to RNA polymerase III subunit RPC2 (predicted) (RGD1565311_predicted), mRNA [XM_343188]		FALSE
