# Supplementary material for: Analysis of Common and Specific Mechanisms of Liver Function Affected by Nitrotoluene Compounds
Source: PLoS One. 2011 Feb 8;6(2):e14662. doi: 10.1371/journal.pone.0014662 (PMC3035612; doi:10.1371/journal.pone.0014662)
Supplement: Table S9 — A table (supplementary table 9) providing a list of genes that were significantly regulated by TNT at 24 h. (0.02 MB XLSX) [file pone.0014662.s009.xlsx]

## Sheet: TNT24h
Supplementary table 9 Significantly regulated genes by TNT at 24h
ProbeName	Corrected p-value	p-value	[RatLTNT24h_C](normalized)	[RatLTNT24h_4.8](normalized)	[RatLTNT24h_48](normalized)	[RatLTNT24h_96](normalized)	[RatLTNT24h_192](normalized)	Common name	GeneSymbol	Description	GenbankAccession	ControlType
A_42_P455531	0.044851	0.000113137	-0.0751271	0.524239	-0.0864717	-0.212225	-0.470017	NM_012527	Chrm3	Rattus norvegicus cholinergic receptor, muscarinic 3 (Chrm3), mRNA [NM_012527]	NM_012527	FALSE
A_42_P592157	0.0473977	0.000486813	-1.00557	-0.381502	-0.306355	-0.910149	-1.20828	NM_001002828	Pbx2	Rattus norvegicus pre-B-cell leukemia transcription factor 2 (Pbx2), mRNA [NM_001002828]	NM_001002828	FALSE
A_42_P679814	0.0473977	0.000449132	-0.258552	-0.539816	-0.405085	-0.200234	1.38874	NM_145782	Cyp3a18	Rattus norvegicus cytochrome P450, 3a18 (Cyp3a18), mRNA [NM_145782]	NM_145782	FALSE
A_42_P698188	0.0473977	0.000589125	0.356112	0.373995	0.239396	0.36623	-0.0421688	ENSRNOT00000009312	ENSRNOT00000009312	Neogenin precursor (Fragment). [Source:Uniprot/SWISSPROT;Acc:P97603] [ENSRNOT00000009312]		FALSE
A_42_P726944	0.0473977	0.000516601	-0.65241	0.226381	0.0209725	-1.2235	-1.87073	ENSRNOT00000038020	RGD1564507_predicted	PREDICTED: Rattus norvegicus similar to Nck-associated protein 5 (predicted) (RGD1564507_predicted), mRNA [XM_344134]		FALSE
A_42_P799494	0.0473977	0.000242897	0.366992	-0.268249	-0.118928	0.697058	1.93103	ENSRNOT00000036258	Htatip2_predicted	PREDICTED: Rattus norvegicus HIV-1 tat interactive protein 2, homolog (human) (predicted) (Htatip2_predicted), mRNA [XM_214927]		FALSE
A_42_P836063	0.0494952	0.000989905	-0.060325	-0.336907	-0.423568	0.065708	0.507087	ENSRNOT00000034503	Kbtbd3_predicted	PREDICTED: Rattus norvegicus kelch repeat and BTB (POZ) domain containing 3 (predicted) (Kbtbd3_predicted), mRNA [XM_235782]		FALSE
A_43_P11560	0.0481407	0.000781483	-0.354349	0.44619	-0.252427	-0.667004	-1.44271	NM_012779	Aqp5	Rattus norvegicus aquaporin 5 (Aqp5), mRNA [NM_012779]	NM_012779	FALSE
A_43_P11754	0.0399621	6.61668e-05	0.425118	-0.271068	1.40461	1.50767	3.44322	NM_013215	Akr7a3	Rattus norvegicus aldo-keto reductase family 7, member A3 (aflatoxin aldehyde reductase) (Akr7a3), mRNA [NM_013215]	NM_013215	FALSE
A_43_P15289	0.0473977	0.000631872	-0.509519	0.0580748	0.239151	-0.399529	-0.625251	CF111798	CF111798	Shultzomica05049 Rat lung airway and parenchyma cDNA libraries Rattus norvegicus cDNA clone Contig948 5', mRNA sequence [CF111798]	CF111798	FALSE
A_43_P17109	0.0481407	0.000785216	-0.386452	-0.283715	0.0724428	0.0290461	0.817482	NM_212520	Tomm40	Rattus norvegicus translocase of outer mitochondrial membrane 40 homolog (yeast) (Tomm40), mRNA [NM_212520]	NM_212520	FALSE
A_43_P17609	0.0473977	0.000493185	0.307121	0.0609906	0.157132	0.0366676	0.528862	NM_001007622	Pdlim2	Rattus norvegicus PDZ and LIM domain 2 (Pdlim2), mRNA [NM_001007622]	NM_001007622	FALSE
A_43_P17743	0.0473977	0.00019483	0.406409	-0.584388	0.453372	1.40574	2.88693	NM_001009474	Pir	Rattus norvegicus pirin (Pir), mRNA [NM_001009474]	NM_001009474	FALSE
A_43_P18795	0.0473977	0.000547741	-0.333048	-0.465733	-0.107639	-0.0311526	0.754706	NM_001047849	Agpat6	Rattus norvegicus 1-acylglycerol-3-phosphate O-acyltransferase 6 (lysophosphatidic acid acyltransferase, zeta) (Agpat6), mRNA [NM_001047849]	NM_001047849	FALSE
A_43_P22663	0.0473977	0.000332442	-0.277956	-0.697577	-0.528397	0.141688	1.65347	ENSRNOT00000020823	Il17rb_predicted	PREDICTED: Rattus norvegicus interleukin 17 receptor B (predicted) (Il17rb_predicted), mRNA [XM_224604]		FALSE
A_44_P1000888	0.0473977	0.000300883	-0.327137	-0.0489616	-0.434116	-0.930252	-1.61857	XM_341391	Plac9_predicted	PREDICTED: Rattus norvegicus placenta-specific 9 (predicted) (Plac9_predicted), mRNA [XM_341391]	XM_341391	FALSE
A_44_P1002360	0.044851	0.000108626	0.475546	-0.250128	0.890082	1.06256	2.57502	NM_175757	Cryl1	Rattus norvegicus crystallin, lamda 1 (Cryl1), mRNA [NM_175757]	NM_175757	FALSE
A_44_P103544	0.0499952	0.000956591	-0.701026	-0.61075	-0.694525	-0.57537	0.341774	CO574689	CO574689	AGENCOURT_28449258 NIH_MGC_248 Rattus norvegicus cDNA clone IMAGE:7364971 5', mRNA sequence [CO574689]	CO574689	FALSE
A_44_P1071390	0.0473977	0.000428202	1.10056	0.754957	1.07431	1.29446	2.5091	AY156086	AY156086	Rattus norvegicus INSIG2a (Insig2) mRNA, 5' untranslated region, alternatively spliced. [AY156086]	AY156086	FALSE
A_44_P121867	0.0473977	0.000526264	0.184073	-0.13755	0.407664	1.04671	1.22455	XR_006580	LOC300332	PREDICTED: Rattus norvegicus similar to heat shock protein 8 (LOC300332), mRNA [XR_006580]	XR_006580	FALSE
A_44_P127318	0.0284298	1.78815e-05	-0.71233	-0.566015	-0.0839218	-0.00988793	0.194111	XM_001055014	MGC114417	PREDICTED: Rattus norvegicus similar to hypothetical protein D15Ertd785e (MGC114417), mRNA [XM_001055014]	XM_001055014	FALSE
A_44_P129053	0.0399621	4.12558e-05	-0.179529	-0.514592	0.276174	0.280057	1.26593	AA848383	AA848383	AA848383 EST191143 Normalized rat kidney, Bento Soares Rattus sp. cDNA clone RKIAB83 5' end, mRNA sequence [AA848383]	AA848383	FALSE
A_44_P133344	0.0481949	0.000892873	0.0398911	-0.213179	0.195842	0.233012	0.908455	NM_001014153	RGD1304869_predicted	Rattus norvegicus similar to arginine N-methyltransferase p82 isoform (predicted) (RGD1304869_predicted), mRNA [NM_001014153]	NM_001014153	FALSE
A_44_P138167	0.0473977	0.000487365	-0.833692	-0.578056	-0.102716	-0.143217	-0.511446	ENSRNOT00000058560	ENSRNOT00000058560	PREDICTED: Rattus norvegicus UDP-N-acetylglucosamine pyrophosphorylase 1 (predicted) (Uap1_predicted), mRNA [XM_222863]		FALSE
A_44_P148773	0.0473977	0.000597615	-0.344384	-0.249565	-0.233061	-0.662433	-0.849749	AI169077	AI169077	AI169077 EST214906 Normalized rat kidney, Bento Soares Rattus sp. cDNA clone RKIBM73 3' end, mRNA sequence [AI169077]	AI169077	FALSE
A_44_P151422	0.0473977	0.000656782	-0.424387	-0.252498	0.0615439	-0.333894	-0.0345644	NM_153731	Znf14	Rattus norvegicus zinc finger protein 14 (KOX 6) (Znf14), mRNA [NM_153731]	NM_153731	FALSE
A_44_P157721	0.0481949	0.000892137	-0.0268401	-0.496439	0.144023	0.671908	1.03813	Y00054	Y00054	RNHSC73 Rat gene for hsc73 , the major hsp70-like protein [Y00054]	Y00054	FALSE
A_44_P161674	0.0481407	0.000809759	-0.581677	-0.568812	0.0178967	-0.145129	0.299552	ENSRNOT00000007470	RGD1561150_predicted	PREDICTED: Rattus norvegicus similar to CPN10-like protein (predicted) (RGD1561150_predicted), mRNA [XM_233177]		FALSE
A_44_P174374	0.0473977	0.000254032	0.0744817	-0.55246	0.253051	0.361932	1.50834	NM_012844	Ephx1	Rattus norvegicus epoxide hydrolase 1, microsomal (Ephx1), transcript variant 2, mRNA [NM_012844]	NM_012844	FALSE
A_44_P183048	0.0481949	0.000882858	-0.364596	-0.935039	0.0341717	0.503828	1.86946	ENSRNOT00000013899	ENSRNOT00000013899	PREDICTED: Rattus norvegicus cytidine 5'-triphosphate synthase (predicted) (Ctps_predicted), mRNA [XM_233467]		FALSE
A_44_P200617	0.0473977	0.000457545	0.252801	-0.507806	-0.276545	0.0401223	1.0153	XM_221132	Ube2o_predicted	PREDICTED: Rattus norvegicus ubiquitin-conjugating enzyme E2O (predicted) (Ube2o_predicted), mRNA [XM_221132]	XM_221132	FALSE
A_44_P203532	0.0494952	0.000989557	-0.259928	-0.185205	0.0268431	-0.279622	0.893814	NM_131906	Slco1a4	Rattus norvegicus solute carrier organic anion transporter family, member 1a4 (Slco1a4), mRNA [NM_131906]	NM_131906	FALSE
A_44_P211069	0.0494952	0.000983042	-0.0292996	-0.088293	-0.272206	-0.812325	-0.69249	ENSRNOT00000014158	RGD1306119_predicted	PREDICTED: Rattus norvegicus similar to transcriptional regulating protein 132 (predicted) (RGD1306119_predicted), mRNA [XM_234404]		FALSE
A_44_P215602	0.0473977	0.000270331	-0.722385	-0.608477	-0.187666	-0.189392	0.545855	XR_007178	LOC294396	PREDICTED: Rattus norvegicus similar to 60 kDa heat shock protein, mitochondrial precursor (Hsp60) (60 kDa chaperonin) (CPN60) (Heat shock protein 60) (HSP-60) (Mitochondrial matrix protein P1) (HSP-65) (LOC294396), mRNA [XR_007178]	XR_007178	FALSE
A_44_P217590	0.0473977	0.000210628	-0.175205	-0.081048	0.292598	0.285935	0.384509	NM_053794	Prkwnk1	Rattus norvegicus protein kinase, lysine deficient 1 (Prkwnk1), mRNA [NM_053794]	NM_053794	FALSE
A_44_P221742	0.0481407	0.000732825	-0.0453602	-0.236461	-0.0963806	0.188437	0.84399	ENSRNOT00000025433	Psmd5_predicted	PREDICTED: Rattus norvegicus proteasome (prosome, macropain) 26S subunit, non-ATPase, 5 (predicted) (Psmd5_predicted), mRNA [XM_216041]		FALSE
A_44_P232642	0.0473977	0.000323364	0.213283	-0.324715	-0.161215	0.296873	1.36553	NM_001008301	Usp14	Rattus norvegicus ubiquitin specific protease 14 (Usp14), mRNA [NM_001008301]	NM_001008301	FALSE
A_44_P250368	0.0473977	0.000606053	0.0966145	-0.321296	-0.0391422	-0.0708506	0.978332	DY316560	Tk1	AGENCOURT_66881167 NIH_MGC_367 Rattus norvegicus cDNA clone IMAGE:8373977 5', mRNA sequence [DY316560]	DY316560	FALSE
A_44_P274362	0.0473977	0.000162262	0.0718048	0.136601	0.0461621	-0.292162	-0.62616	TC621912	TC621912	BC058646 Rai17 protein {Mus musculus} (exp=-1; wgp=0; cg=0), partial (4%) [TC621912]		FALSE
A_44_P285820	0.0481949	0.000846754	-1.39136	-0.0634935	-0.907796	-1.85079	-3.27927	NM_032074	Irs3	Rattus norvegicus insulin receptor substrate 3 (Irs3), mRNA [NM_032074]	NM_032074	FALSE
A_44_P287560	0.0481949	0.000868578	-0.529392	-0.010167	0.00238172	-0.455448	-1.10737	H33491	H33491	H33491 EST109547 Rat PC-12 cells, NGF-treated (9 days) Rattus sp. cDNA clone RPNAS68 3' end, mRNA sequence [H33491]	H33491	FALSE
A_44_P306932	0.0481407	0.00081019	0.807872	0.912569	0.818618	0.901212	-0.0823243	NM_001037210	Gipc2	Rattus norvegicus GIPC PDZ domain containing family, member 2 (Gipc2), mRNA [NM_001037210]	NM_001037210	FALSE
A_44_P314122	0.0473977	0.000337834	-0.0965568	-0.457126	0.23484	0.902059	1.12736	XM_212821	XM_212821	Rattus norvegicus similar to Heat shock cognate 71 kDa protein (LOC291461), mRNA [XM_212821]	XM_212821	FALSE
A_44_P318546	0.0491238	0.000930766	-0.509244	-0.0866413	-0.246033	-0.187405	-1.26695	ENSRNOT00000023149	Nritp	Ion transporter protein (Fragment). [Source:Uniprot/SPTREMBL;Acc:Q9QZG1] [ENSRNOT00000023149]		FALSE
A_44_P322518	0.0473977	0.000304796	-0.543071	-0.702384	-0.0746408	-0.061859	0.654936	NM_001033684	Cct6a	Rattus norvegicus chaperonin subunit 6a (zeta) (Cct6a), mRNA [NM_001033684]	NM_001033684	FALSE
A_44_P326124	0.0481407	0.000794711	-0.004125	-0.260583	0.27672	0.858534	1.07756	XM_001056105	LOC679385	PREDICTED: Rattus norvegicus similar to heat shock protein 8 (LOC679385), mRNA [XM_001056105]	XM_001056105	FALSE
A_44_P330035	0.0473977	0.000658578	0.0426447	-0.42014	-0.0325812	0.01195	0.458072	BM986596	BM986596	BM986596 EST594190 Rat gene index, normalized rat, norvegicus Rattus norvegicus cDNA clone RGOAD49 3' end, mRNA sequence [BM986596]	BM986596	FALSE
A_44_P335241	0.0473977	0.00050781	-0.264031	-0.534262	-0.408686	-0.200222	0.944226	NM_001006998	Aldh3b1	Rattus norvegicus aldehyde dehydrogenase 3 family, member B1 (Aldh3b1), mRNA [NM_001006998]	NM_001006998	FALSE
A_44_P338137	0.0481407	0.000739845	-1.04901	-1.34358	-0.233523	-0.140648	0.631101	NM_001033684	Cct6a	Rattus norvegicus chaperonin subunit 6a (zeta) (Cct6a), mRNA [NM_001033684]	NM_001033684	FALSE
A_44_P357358	0.0481949	0.000856914	0.199714	-0.0171615	0.282945	0.098024	1.15463	NM_001002253	Atp6v0e2	Rattus norvegicus ATPase, H+ transporting, V0 subunit E isoform 2 (Atp6v0e2), mRNA [NM_001002253]	NM_001002253	FALSE
A_44_P370355	0.0473977	0.000452111	-0.0688266	-0.219246	0.22803	0.873583	1.03092	XR_005817	LOC305639	PREDICTED: Rattus norvegicus similar to heat shock protein 8 (LOC305639), mRNA [XR_005817]	XR_005817	FALSE
A_44_P377432	0.0414834	7.86002e-05	-1.06476	-1.59335	-0.931334	-1.04213	0.106383	ENSRNOT00000039652	RGD1562101_predicted	PREDICTED: Rattus norvegicus similar to very large G-protein coupled receptor 1 (LOC362068), mRNA [XM_001056150]		FALSE
A_44_P382349	0.0473977	0.000641707	-0.00995016	-0.349058	0.25252	0.275055	0.942895	ENSRNOT00000045407	ENSRNOT00000045407	similar to 60S ribosomal protein L3-like (LOC302564), mRNA [Source:RefSeq_dna;Acc:XR_005605] [ENSRNOT00000045407]		FALSE
A_44_P384698	0.0481407	0.000740253	-0.0731727	0.00956571	0.264264	0.126723	0.756498	XR_005954	LOC297785	PREDICTED: Rattus norvegicus hypothetical LOC297785 (LOC297785), mRNA [XR_005954]	XR_005954	FALSE
A_44_P386579	0.0481053	0.000698793	-0.491335	-0.408191	0.424374	0.238314	0.460277	NM_173306	Lama3	Rattus norvegicus laminin, alpha 3 (Lama3), mRNA [NM_173306]	NM_173306	FALSE
A_44_P389297	0.0473977	0.000328258	-0.0220631	0.188465	0.267023	0.354042	1.0136	A_44_P389297	A_44_P389297			FALSE
A_44_P396546	0.0473977	0.000236774	-0.46	-0.504055	-0.212156	0.683579	0.985948	NM_024351	Hspa8	Rattus norvegicus heat shock protein 8 (Hspa8), mRNA [NM_024351]	NM_024351	FALSE
A_44_P409132	0.0399621	6.0606e-05	-0.700609	-0.267112	-0.199808	-0.745528	-1.42255	BG668902	BG668902	DRN03A01 Rat DRG Library Rattus norvegicus cDNA clone DRN03A01 5', mRNA sequence [BG668902]	BG668902	FALSE
A_44_P411505	0.0473977	0.000274436	-0.399113	0.0629977	0.262142	-0.376894	-1.74179	NM_171992	Ccnd1	Rattus norvegicus cyclin D1 (Ccnd1), mRNA [NM_171992]	NM_171992	FALSE
A_44_P430033	0.0399621	6.73046e-05	-0.0672377	0.152813	0.0363897	-0.134123	-0.643285	AI231180	AI231180	AI231180 EST227868 Normalized rat embryo, Bento Soares Rattus sp. cDNA clone REMDG81 3' end, mRNA sequence [AI231180]	AI231180	FALSE
A_44_P432358	0.0473977	0.0004244	-0.699014	-0.849819	0.279318	0.336405	1.69846	NM_057105	Ugt1a6	Rattus norvegicus UDP glycosyltransferase 1 family, polypeptide A6 (Ugt1a6), transcript variant 2, mRNA [NM_057105]	NM_057105	FALSE
A_44_P443349	0.0481407	0.000820926	-0.642446	-0.446242	-0.330297	-0.0382433	0.821011	NM_001014062	RGD1306195	Rattus norvegicus similar to RAN protein (RGD1306195), mRNA [NM_001014062]	NM_001014062	FALSE
A_44_P443542	0.0473977	0.000620616	-0.206999	-0.533301	-0.233803	0.112826	0.648627	ENSRNOT00000021140	Mars2_predicted	Rattus norvegicus similar to hypothetical protein BC009115 (LOC316403), mRNA [XM_237156]		FALSE
A_44_P446578	0.0473977	0.000546754	-0.367649	-0.267577	-0.223155	-0.0394965	1.09532	NM_012683	Ugt1a1	Rattus norvegicus UDP glycosyltransferase 1 family, polypeptide A1 (Ugt1a1), mRNA [NM_012683]	NM_012683	FALSE
A_44_P466255	0.0473977	0.000331075	-0.430133	-0.471606	0.244871	-0.0147132	0.744618	XM_001074661	LOC690517	PREDICTED: Rattus norvegicus similar to Ornithine decarboxylase (ODC) (LOC690517), mRNA [XM_001074661]	XM_001074661	FALSE
A_44_P466507	0.0473977	0.000404909	-0.35833	-0.5234	-0.201587	0.0662742	0.451875	NM_001077672	Cstf3_predicted	Rattus norvegicus cleavage stimulation factor, 3' pre-RNA, subunit 3 (predicted) (Cstf3_predicted), mRNA [NM_001077672]	NM_001077672	FALSE
A_44_P476733	0.0481407	0.000735481	-0.128171	-0.533663	0.601617	0.803106	2.43419	NM_017000	Nqo1	Rattus norvegicus NAD(P)H dehydrogenase, quinone 1 (Nqo1), mRNA [NM_017000]	NM_017000	FALSE
A_44_P481892	0.0491238	0.000924211	-0.295177	0.19407	0.108937	-0.811253	-1.30156	BC107936	BC107936	Rattus norvegicus cDNA clone IMAGE:7321132 [BC107936]	BC107936	FALSE
A_44_P487632	0.0473977	0.000562882	-0.0553346	-0.639966	0.31075	0.0902688	0.0744573	ENSRNOT00000046207	ENSRNOT00000046207	PREDICTED: Rattus norvegicus interferon, alpha 4 (predicted) (Ifna4_predicted), mRNA [XM_001053305]		FALSE
A_44_P501483	0.0473977	0.00061647	-0.000632882	-0.31792	0.229801	0.893371	1.14707	XR_006667	LOC310385	PREDICTED: Rattus norvegicus similar to heat shock protein 8 (LOC310385), mRNA [XR_006667]	XR_006667	FALSE
A_44_P503868	0.0399621	6.46829e-05	-0.144948	-0.365458	0.165387	0.807217	1.02889	XR_007212	LOC310891	PREDICTED: Rattus norvegicus similar to heat shock protein 8 (LOC310891), mRNA [XR_007212]	XR_007212	FALSE
A_44_P513465	0.0473977	0.000612204	0.0654955	-0.316495	0.0321989	0.297207	0.884422	ENSRNOT00000038970	Ddx31_predicted	Rattus norvegicus similar to DEAD (Asp-Glu-Ala-Asp) box polypeptide 31 isoform 1; DEAD/DEXH helicase DDX31 (LOC311835), mRNA [XM_242296]		FALSE
A_44_P518585	0.0473977	0.000558289	-0.321165	-0.579319	-0.390255	-0.151109	0.349607	NM_001025015	Gtpbp8	Rattus norvegicus GTP-binding protein 8 (putative) (Gtpbp8), mRNA [NM_001025015]	NM_001025015	FALSE
A_44_P521399	0.0481053	0.000681169	-0.13055	0.343618	0.651485	0.0561594	-0.358299	XM_220782	Rasl10b_predicted	PREDICTED: Rattus norvegicus RAS-like, family 10, member B (predicted) (Rasl10b_predicted), mRNA [XM_220782]	XM_220782	FALSE
A_44_P522477	0.0481949	0.00086883	-0.0793482	-0.530918	-0.448102	-0.302196	0.592887	NM_001004267	Tmem106b	Rattus norvegicus transmembrane protein 106B (Tmem106b), mRNA [NM_001004267]	NM_001004267	FALSE
A_44_P530196	0.0473977	0.000357077	-0.714569	-0.208965	-0.951847	-1.24936	-1.7253	ENSRNOT00000038176	ENSRNOT00000038176	PREDICTED: Rattus norvegicus antigen identified by monoclonal antibody Ki-67 (predicted) (Mki67_predicted), mRNA [XM_225460]		FALSE
A_44_P538789	0.0473977	0.000620066	-0.122679	-0.289461	0.137845	0.0491512	0.661623	XR_005884	LOC289157	PREDICTED: Rattus norvegicus similar to Glyceraldehyde-3-phosphate dehydrogenase (GAPDH) (LOC289157), mRNA [XR_005884]	XR_005884	FALSE
A_44_P543619	0.0473977	0.000168783	-1.05393	-0.269338	-0.264127	-0.849118	-2.35802	ENSRNOT00000037228	ENSRNOT00000037228	PREDICTED: Rattus norvegicus similar to hypothetical protein FLJ14624 (predicted) (RGD1560183_predicted), mRNA [XM_224552]		FALSE
A_44_P548203	0.0473977	0.000592865	0.608696	-0.156176	0.177773	0.959576	3.00347	BC087677	Rbm3	Rattus norvegicus cDNA clone MGC:105811 IMAGE:7318884, complete cds. [BC087677]	BC087677	FALSE
A_44_P635423	0.0284298	1.79556e-05	0.0232557	-0.403195	-0.882458	-0.570966	0.542348	AW141130	AW141130	EST291162 Normalized rat brain, Bento Soares Rattus sp. cDNA clone RGIBD16 5' end similar to interleukin-3 receptor B subunit, mRNA sequence [AW141130]	AW141130	FALSE
A_44_P638264	0.044851	0.000113308	-0.0513909	-0.205096	-0.231971	0.153774	1.23726	TC594447	TC594447	Q9U677_DROME (Q9U677) Coatomer protein gamma subunit, partial (3%) [TC594447]		FALSE
A_44_P650141	0.0481053	0.000689156	0.137916	0.119085	0.589834	0.445191	-0.400379	AI104371	AI104371	AI104371 EST213660 Normalized rat heart, Bento Soares Rattus sp. cDNA clone RHECC42 3' end, mRNA sequence [AI104371]	AI104371	FALSE
A_44_P667876	0.0473977	0.000488215	-0.0524453	-0.282619	-0.311195	0.0264845	0.632081	ENSRNOT00000042838	ENSRNOT00000042838	similar to Galectin-8 (LGALS-8) (LOC503179), mRNA [Source:RefSeq_dna;Acc:XR_008835] [ENSRNOT00000042838]		FALSE
A_44_P674018	0.0494952	0.000972102	-0.0503204	-0.493598	-0.782962	-0.432836	0.852607	CF110927	CF110927	Shultzomica04178 Rat lung airway and parenchyma cDNA libraries Rattus norvegicus cDNA clone Contig3708 5', mRNA sequence [CF110927]	CF110927	FALSE
A_44_P728149	0.0473977	0.000510398	-0.245527	-0.442955	-0.018671	0.25035	1.66956	NM_001024304	MGC108896	Rattus norvegicus similar to glutathione transferase GSTM7-7 (MGC108896), mRNA [NM_001024304]	NM_001024304	FALSE
A_44_P744488	0.0284298	1.47155e-05	-0.407039	-0.507493	-0.0608625	0.681525	0.865104	A_44_P744488	A_44_P744488			FALSE
A_44_P790750	0.0481407	0.000815267	-0.402335	-0.779763	0.0164584	0.0123583	0.750787	XR_006810	LOC364646	PREDICTED: Rattus norvegicus similar to chaperonin containing TCP1, subunit 6A isoform a (LOC364646), mRNA [XR_006810]	XR_006810	FALSE
A_44_P806560	0.0473977	0.000384124	-0.156728	-0.441719	-0.0357366	-0.0823642	0.661295	ENSRNOT00000038391	ENSRNOT00000038391			FALSE
A_44_P843496	0.0473977	0.000280189	-0.232853	-0.663681	-0.19474	-0.0249225	0.489086	A_44_P843496	A_44_P843496			FALSE
A_44_P853775	0.0473977	0.000239997	0.397992	-0.114483	0.386155	0.820123	2.47364	XM_001077260	LOC691221	PREDICTED: Rattus norvegicus similar to CG1998-PA (LOC691221), mRNA [XM_001077260]	XM_001077260	FALSE
A_44_P883204	0.0473977	0.00057653	-0.190811	-0.271689	0.171948	0.0282475	0.494564	ENSRNOT00000060225	ENSRNOT00000060225	similar to 40S ribosomal protein SA (p40) (34/67 kDa laminin receptor) (Colon carcinoma laminin-binding protein) (NEM/1CHD4) (Multidrug resistance-associated protein MGr1-Ag) (LOC364853), mRNA [Source:RefSeq_dna;Acc:XR_008478] [ENSRNOT00000060225]		FALSE
A_44_P913600	0.0473977	0.000446749	-0.639371	-0.799995	-0.025725	-0.0593013	0.642066	A_44_P913600	A_44_P913600			FALSE
A_44_P960491	0.0473977	0.000648103	-0.724202	-0.369463	0.0346583	-0.0685409	-0.574316	ENSRNOT00000058560	ENSRNOT00000058560	PREDICTED: Rattus norvegicus similar to UDP-N-acteylglucosamine pyrophosphorylase 1 homolog (predicted) (RGD1561967_predicted), mRNA [XM_573497]		FALSE
A_44_P976187	0.0481407	0.000784314	-0.589369	-0.257465	-0.134849	-0.526301	-1.11949	NM_001024303	LOC499677	Rattus norvegicus similar to Lix1 homolog (mouse) like (LOC499677), mRNA [NM_001024303]	NM_001024303	FALSE
A_44_P987040	0.0473977	0.000495895	-0.430899	-0.820899	-0.571502	-0.394297	1.35651	NM_178091	Insig2	Rattus norvegicus insulin induced gene 2 (Insig2), mRNA [NM_178091]	NM_178091	FALSE
