# Supplementary material for: Analysis of Common and Specific Mechanisms of Liver Function Affected by Nitrotoluene Compounds
Source: PLoS One. 2011 Feb 8;6(2):e14662. doi: 10.1371/journal.pone.0014662 (PMC3035612; doi:10.1371/journal.pone.0014662)
Supplement: Table S12 — A table (supplementary table 12) providing a list of genes in the stress and toxicity pathway that were used for QRT-PCR. (0.03 MB XLSX) [file pone.0014662.s012.xlsx]

## Sheet: All Data
Supplementary table 12 Stress pathway genes for RT-PCR
	24h FC	24h pvalue	48h FC	48h pvalue	p-value	FCAbsolute	regulation	GeneSymbol	Refseq	Symbol	Description
Actb	-1.5252	0.308794	-1.4626	0.011959	0.59157	1.13605	down	Actb	NM_031144	Actb	Actin, beta
Anxa5	-1.4231	0.123137	-1.7038	0.001791	0.313112	1.29264	down	Actb	NM_013132	Anxa5	Annexin A5
Atm	-2.9286	0.00529	-1.583	0.001767	0.113933	1.90892	down	Anxa5	XM_236275	Atm	Ataxia telangiectasia mutated homolog (human)
Bax	2.4136	0.029373	1.8542	0.000537	0.0449834	2.46004	down	Anxa5	NM_017059	Bax	Bcl2-associated X protein
Bcl2l1	1.3345	0.477562	1.5663	0.158249	0.0259087	1.81453	up	Bax	NM_031535	Bcl2l1	Bcl2-like 1
Casp1	-1.6364	0.017502	-2.6759	0.005922	0.0693502	1.41368	down	Casp1	NM_012762	Casp1	Caspase 1
Casp8	1.1226	0.646855	-2.1694	0.028123	0.0857894	1.82674	up	Ccl21b	NM_022277	Casp8	Caspase 8
Ccl21b	-1.6857	0.132293	2.0547	0.06363	0.473212	1.39427	down	Ccnd1	NM_001008513	Ccl21b	Chemokine (C-C motif) ligand 21b (serine)
Ccl3	1.6737	0.230657	-4.5981	0.003799	0.364681	1.40682	down	Ccnd1	NM_013025	Ccl3	Chemokine (C-C motif) ligand 3
Ccl4	1.2598	0.487421	-6.065	0.008121	0.00981183	3.49499	up	Ccng1	NM_053858	Ccl4	Chemokine (C-C motif) ligand 4
Ccnc	1.6559	0.041954	-1.1783	0.173453	0.0222335	3.03141	up	Ccng1	XM_342812	Ccnc	Cyclin C
Ccnd1	4.4428	0.00158	-1.308	0.351831	0.00393092	4.60833	up	Cdkn1a	NM_171992	Ccnd1	Cyclin D1
Ccng1	5.9989	0.00221	1.3235	0.809649	0.257521	1.42156	down	Cryab	NM_012923	Ccng1	Cyclin G1
Cdkn1a	6.3317	0.001724	4.6147	0.005358	0.264153	1.59477	down	Cyp2b15	NM_080782	Cdkn1a	Cyclin-dependent kinase inhibitor 1A
Chek2	-1.8588	0.060221	-1.6789	0.189756	0.274552	1.57546	down	Cyp2b3	NM_053677	Chek2	CHK2 checkpoint homolog (S. pombe)
Cryab	1.5164	0.357754	-1.4431	0.092292	0.117176	1.56471	down	Cyp4a14	NM_012935	Cryab	Crystallin, alpha B
Csf2	2.2233	0.146033	-2.2073	0.11471	0.0239849	1.96838	down	Cyp4a22	XM_340799	Csf2	Colony stimulating factor 2 (granulocyte-macrophage)
Cxcl10	2.6654	0.176789	-13.9571	0.001848	0.248467	2.44786	up	Cyp7a1	NM_139089	Cxcl10	Chemokine (C-X-C motif) ligand 10
Cyp1a1	4.2836	0.006157	19.6436	0.001886	0.988484	1.00442	down	Ddit3	NM_012540	Cyp1a1	Cytochrome P450, family 1, subfamily a, polypeptide 1
Cyp1b1	-2.1741	0.029376	-1.5219	0.315999	0.0306245	2.56587	down	Dnaja1	NM_012940	Cyp1b1	Cytochrome P450, family 1, subfamily b, polypeptide 1
Cyp2a3a	-5.1238	0.028253	-3.563	0.00236	0.000825808	20.8288	up	Egr1	NM_012542	Cyp2a3a	Cytochrome P450, family 2, subfamily A, polypeptide 3a
Cyp2b15	-1.8559	0.02179	-1.2906	0.201476	0.00289483	8.60124	down	Fmo1	NM_017156	Cyp2b15	Cytochrome P450, family 2, subfamily b, polypeptide 15
Cyp2b3	-2.3762	0.010675	-1.2508	0.195528	0.736899	1.13058	up	Fmo5	NM_173294	Cyp2b3	Cytochrome P450IIB3
Cyp2c13	-1.9815	0.104452	1.2701	0.385708	0.267863	1.5119	up	Gadd45a	NM_138514	Cyp2c13	Cytochrome P450 2c13
Cyp3a2	-1.7026	0.16354	1.0654	0.840937	0.00816482	2.39593	down	Gpx1	NM_153312	Cyp3a2	Cytochrome P450, family 3, subfamily a, polypeptide 2
Cyp4a1	-1.2229	0.082441	-2.1985	6.6e-05	0.00917247	2.55693	down	Gpx1	NM_175837	Cyp4a1	Cytochrome P450, family 4, subfamily a, polypeptide 1
Cyp4a3	-1.3679	0.029277	-1.2969	0.009255	0.0693723	1.66495	down	Gsr	NM_175760	Cyp4a3	Cytochrome P450, family 4, subfamily a, polypeptide 3
Cyp7a1	-5.5047	0.001963	1.9119	0.294549	0.000315241	3.61172	up	Gstm1	NM_012942	Cyp7a1	Cytochrome P450, family 7, subfamily a, polypeptide 1
Ddit3	-1.4931	0.017252	1.0769	0.631784	0.00474052	3.34746	down	Gstm3	NM_024134	Ddit3	DNA-damage inducible transcript 3
Dnaja1	-1.1016	0.767145	-1.9946	0.017171	0.00185237	4.15925	up	Hmox1	NM_022934	Dnaja1	DnaJ (Hsp40) homolog, subfamily A, member 1
E2f1	-1.076	0.836945	2.2836	0.161832	0.305296	1.4977	down	Hmox2	XM_230765	E2f1	E2F transcription factor 1
Egr1	-3.8551	0.039922	3.5661	0.221883	0.0238368	1.93162	down	Hmox2	NM_012551	Egr1	Early growth response 1
Ephx2	-1.8778	0.018882	-4.8154	0.040572	0.105995	1.49814	down	Hprt	NM_022936	Ephx2	Epoxide hydrolase 2, cytoplasmic
Ercc1_predicted	-1.2196	0.631593	-1.0797	0.566991	0.110505	1.62253	down	Hprt	XM_214833	Ercc1_predicted	Excision repair cross-complementing rodent repair deficiency, complementation group 1 (predicted)
Ercc2	1.4769	0.252366	-1.084	0.465532	0.109254	1.6374	down	Hprt	XM_218424	Ercc2	Similar to nucleotide excision repair protein (LOC308415), mRNA
Faslg	-1.6784	0.076963	-1.9661	0.008799	0.0373685	1.62932	down	Hprt	NM_012908	Faslg	Fas ligand (TNF superfamily, member 6)
Fmo1	-4.7561	0.000892	-17.6565	0.000567	0.102246	1.85976	down	Hspa1a	NM_012792	Fmo1	Flavin containing monooxygenase 1
Fmo4	-2.2945	0.001876	-2.2368	0.015905	0.049964	3.34312	down	Hspa4	NM_144562	Fmo4	Flavin containing monooxygenase 4
Fmo5	-1.3093	0.111446	-1.0151	0.926503	0.598866	1.18203	down	Hspa4	NM_144739	Fmo5	Flavin containing monooxygenase 5
Gadd45a	1.9796	0.014543	2.4722	0.101056	0.14766	1.61431	up	Hspa5	NM_024127	Gadd45a	Growth arrest and DNA-damage-inducible 45 alpha
Gpx1	-2.4419	0.002808	-3.9379	2.4e-05	0.0788617	1.79455	down	Hspa8	NM_030826	Gpx1	Glutathione peroxidase 1
Gpx2	13.6938	0.000186	2.9806	0.004747	0.0103161	2.75093	down	Hspa8	NM_183403	Gpx2	Glutathione peroxidase 2
Gsr	1.5657	0.020744	-1.4578	0.001313	0.0132877	2.95862	down	Hspa8	NM_053906	Gsr	Glutathione reductase
Gstm1	5.4533	0.000212	2.1937	0.00577	0.933027	1.02807	up	Hspb1	NM_017014	Gstm1	Glutathione S-transferase, mu 1
Gstm3	-2.3019	0.005132	-4.4364	6e-06	0.633281	1.14079	down	Hspd1	NM_031154	Gstm3	Glutathione S-transferase, mu type 3
Hmox1	1.4263	0.051276	3.411	0.027417	0.412213	1.30829	down	Hspd1	NM_012580	Hmox1	Heme oxygenase (decycling) 1
Hmox2	-1.5496	0.048398	-2.0076	0.001183	0.897263	1.02976	up	Hspd1	NM_024387	Hmox2	Heme oxygenase (decycling) 2
Hprt	-1.0696	0.505272	-1.3946	0.024913	0.46962	1.21267	down	Hspd1	NM_012583	Hprt	Hypoxanthine guanine phosphoribosyl transferase
Hsf1	1.3347	0.29954	1.0092	0.978715	0.53402	1.16663	down	Hspe1	XM_001061027	Hsf1	Heat shock transcription factor 1
Hspa1a	3.1963	0.027819	-1.6545	0.084969	0.357079	1.52977	down	Hsph1	NM_031971	Hspa1a	Heat shock 70kD protein 1A
Hspa1l	1.1706	0.790904	2.4892	0.204602	0.232051	1.64214	down	Il18	NM_212546	Hspa1l	Heat shock 70kD protein 1-like (mapped)
Hspa4	1.787	0.012913	1.3576	0.223564	0.701321	1.07762	up	Il1a	NM_153629	Hspa4	Heat shock protein 4
Hspa5	-3.1439	0.005573	1.3697	0.061829	0.0766081	2.68521	down	Il1b	NM_013083	Hspa5	Heat shock 70kDa protein 5 (glucose-regulated protein)
Hspa8	1.3893	0.158771	-4.2134	0.001011	0.581481	1.17845	down	Il1b	NM_024351	Hspa8	Heat shock protein 8
Hspb1	5.7027	0.000724	1.0726	0.698213	0.511168	1.30942	up	Ldha	NM_031970	Hspb1	Heat shock 27kDa protein 1
Hspd1	1.3361	0.079594	1.1517	0.479478	0.206838	1.42289	up	Mdm2_predicted	NM_022229	Hspd1	Heat shock protein 1 (chaperonin)
Hspe1	1.4049	0.06909	1.2243	0.372748	0.235746	1.15944	down	Mif	NM_012966	Hspe1	Heat shock 10 kDa protein 1 (chaperonin 10)
Hsph1	1.3721	0.297737	-2.5979	0.01015	0.265657	1.3558	down	Nfkbia	NM_001011901	Hsph1	Heat shock 105kDa/110kDa protein 1
Igfbp6	-1.1018	0.749713	-2.1457	0.227683	0.107239	1.23084	down	Pcna	NM_013104	Igfbp6	Insulin-like growth factor binding protein 6
Il18	-2.757	0.000752	-1.5017	0.403308	0.710611	1.11652	up	Pcna	NM_019165	Il18	Interleukin 18
Il1a	1.1063	0.756577	-1.1206	0.429815	0.000313295	6.08799	up	Por	NM_017019	Il1a	Interleukin 1 alpha
Il1b	-1.1882	0.757831	-3.9536	0.016127	0.273778	1.65032	down	Rad23a	NM_031512	Il1b	Interleukin 1 beta
Il6	-1.1156	0.839437	-1.5331	0.154735	0.582706	1.13646	up	RGD1560340_predicted	NM_012589	Il6	Interleukin 6
Ldha	1.2874	0.057082	1.3127	0.02217	0.0316915	1.65799	up	Rpl13a	NM_017025	Ldha	Lactate dehydrogenase A
Lta	-3.2595	0.023553	-1.6698	0.281099	0.423574	1.17981	down	Sod1	NM_080769	Lta	Lymphotoxin A
Mdm2	4.7891	0.00043	1.5788	0.00553	0.621487	1.11528	down	Sod1	XM_235169	Mdm2	Transformed mouse 3T3 cell double minute 2
Mif	1.3314	0.114028	1.0683	0.730416	0.718625	1.08393	down	Sod2	NM_031051	Mif	Macrophage migration inhibitory factor
Nfkb1	-1.3325	0.26612	-1.5477	0.026683	0.0209775	1.6185	up	Tnfrsf1a	XM_342346	Nfkb1	Nuclear factor of kappa light chain gene enhancer in B-cells 1, p105
Nfkbia	1.2453	0.451836	-1.1059	0.788586	0.402687	1.21495	up	Tp53	XM_343065	Nfkbia	Nuclear factor of kappa light chain gene enhancer in B-cells inhibitor, alpha
Nos2	1.3301	0.627482	7.3384	0.000495	0.431654	1.30614	up	Ugt1a6	NM_012611	Nos2	Nitric oxide synthase 2, inducible
Pcna	1.5817	0.037347	1.2233	0.478186	0.413572	1.31331	down	Ung	NM_022381	Pcna	Proliferating cell nuclear antigen
Por	1.1851	0.238028	5.6547	0.005044	0.180933	1.66085	down	Xrcc1	NM_031576	Por	P450 (cytochrome) oxidoreductase
PPC	-2.4458	0.01378	-1.3072	0.19264					SA_00103	PPC	Positive PCR Control
PPC	-2.3531	0.011024	-1.068	0.701189					SA_00103	PPC	Positive PCR Control
PPC	-2.7783	0.0029	13.1801	0.380094					SA_00103	PPC	Positive PCR Control
Rad23a	2.0111	0.008813	-3.0694	0.000427					NM_001013190	Rad23a	RAD23a homolog (S. cerevisiae)
Rad50	-1.1456	0.640054	-2.2941	0.001581					NM_022246	Rad50	RAD50 homolog (S. cerevisiae)
RGD1560340_predicted	1.7914	0.064584	-1.3662	0.026201					XM_222534	RGD1560340_predicted	Similar to ERCC4_MOUSE (predicted)
RGD1564823_predicted	-1.6025	0.159526	-1.4776	0.197107					XM_575317	RGD1564823_predicted	Similar to DNA-repair protein XRCC2 (X-ray repair cross-complementing protein 2) (predicted)
RGDC	-1.8559	0.02179	-1.3078	0.143859					U26919	RGDC	Rat Genomic DNA Contamination
Rpl13a	1.1712	0.252192	1.2336	0.050638					NM_173340	Rpl13a	Ribosomal protein L13A
Rplp1	1.082	0.562566	1.2596	0.287088					NM_001007604	Rplp1	Ribosomal protein, large, P1
RTC	-1.5964	0.104826	-1.1371	0.191375					SA_00104	RTC	Reverse Transcription Control
RTC	-1.7537	0.051134	-1.1631	0.208128					SA_00104	RTC	Reverse Transcription Control
RTC	-1.6474	0.070661	-1.1449	0.296793					SA_00104	RTC	Reverse Transcription Control
Serpine1	2.9643	0.227424	8.1594	0.102015					NM_012620	Serpine1	Serine (or cysteine) peptidase inhibitor, clade E, member 1
Sod1	-1.5723	0.039768	-1.235	0.006913					NM_017050	Sod1	Superoxide dismutase 1
Sod2	-1.4405	0.04265	-1.332	0.158355					NM_017051	Sod2	Superoxide dismutase 2, mitochondrial
Tnfrsf1a	1.9245	0.007807	2.076	0.000375					NM_013091	Tnfrsf1a	Tumor necrosis factor receptor superfamily, member 1a
Tnfsf10	-1.9852	0.019845	-5.678	0.00051					NM_145681	Tnfsf10	Tumor necrosis factor (ligand) superfamily, member 10
Tp53	1.4945	0.092661	-1.0563	0.568894					NM_030989	Tp53	Tumor protein p53
Tradd	1.0907	0.677348	-2.2144	0.003271					XM_341671	Tradd	TNFRSF1A-associated via death domain
Ugt1a6	4.5207	0.000646	1.4829	0.003706					NM_057105	Ugt1a6	UDP glycosyltransferase 1 family, polypeptide A6
Ung	-1.0307	0.812534	-1.3607	0.054035					NM_001013124	Ung	Uracil-DNA glycosylase
Xrcc1	-1.2748	0.348174	-2.1138	0.000473					NM_053435	Xrcc1	X-ray repair complementing defective repair in Chinese hamster cells 1
Xrcc4	-17.6416	3e-06	-3.2682	0.00463					NM_001006999	Xrcc4	X-ray repair complementing defective repair in Chinese hamster cells 4

## Sheet: 24h p<0.05
	24h FC	24h pvalue	48h FC	48h pvalue	Refseq	Symbol	Description
Atm	-2.9286	0.00529	-1.583	0.001767	XM_236275	Atm	Ataxia telangiectasia mutated homolog (human)
Bax	2.4136	0.029373	1.8542	0.000537	NM_017059	Bax	Bcl2-associated X protein
Casp1	-1.6364	0.017502	-2.6759	0.005922	NM_012762	Casp1	Caspase 1
Ccnc	1.6559	0.041954	-1.1783	0.173453	XM_342812	Ccnc	Cyclin C
Ccnd1	4.4428	0.00158	-1.308	0.351831	NM_171992	Ccnd1	Cyclin D1
Ccng1	5.9989	0.00221	1.3235	0.809649	NM_012923	Ccng1	Cyclin G1
Cdkn1a	6.3317	0.001724	4.6147	0.005358	NM_080782	Cdkn1a	Cyclin-dependent kinase inhibitor 1A
Cyp1a1	4.2836	0.006157	19.6436	0.001886	NM_012540	Cyp1a1	Cytochrome P450, family 1, subfamily a, polypeptide 1
Cyp1b1	-2.1741	0.029376	-1.5219	0.315999	NM_012940	Cyp1b1	Cytochrome P450, family 1, subfamily b, polypeptide 1
Cyp2a3a	-5.1238	0.028253	-3.563	0.00236	NM_012542	Cyp2a3a	Cytochrome P450, family 2, subfamily A, polypeptide 3a
Cyp2b15	-1.8559	0.02179	-1.2906	0.201476	NM_017156	Cyp2b15	Cytochrome P450, family 2, subfamily b, polypeptide 15
Cyp2b3	-2.3762	0.010675	-1.2508	0.195528	NM_173294	Cyp2b3	Cytochrome P450IIB3
Cyp4a3	-1.3679	0.029277	-1.2969	0.009255	NM_175760	Cyp4a3	Cytochrome P450, family 4, subfamily a, polypeptide 3
Cyp7a1	-5.5047	0.001963	1.9119	0.294549	NM_012942	Cyp7a1	Cytochrome P450, family 7, subfamily a, polypeptide 1
Ddit3	-1.4931	0.017252	1.0769	0.631784	NM_024134	Ddit3	DNA-damage inducible transcript 3
Egr1	-3.8551	0.039922	3.5661	0.221883	NM_012551	Egr1	Early growth response 1
Ephx2	-1.8778	0.018882	-4.8154	0.040572	NM_022936	Ephx2	Epoxide hydrolase 2, cytoplasmic
Fmo1	-4.7561	0.000892	-17.6565	0.000567	NM_012792	Fmo1	Flavin containing monooxygenase 1
Fmo4	-2.2945	0.001876	-2.2368	0.015905	NM_144562	Fmo4	Flavin containing monooxygenase 4
Gadd45a	1.9796	0.014543	2.4722	0.101056	NM_024127	Gadd45a	Growth arrest and DNA-damage-inducible 45 alpha
Gpx1	-2.4419	0.002808	-3.9379	2.4e-05	NM_030826	Gpx1	Glutathione peroxidase 1
Gpx2	13.6938	0.000186	2.9806	0.004747	NM_183403	Gpx2	Glutathione peroxidase 2
Gsr	1.5657	0.020744	-1.4578	0.001313	NM_053906	Gsr	Glutathione reductase
Gstm1	5.4533	0.000212	2.1937	0.00577	NM_017014	Gstm1	Glutathione S-transferase, mu 1
Gstm3	-2.3019	0.005132	-4.4364	6e-06	NM_031154	Gstm3	Glutathione S-transferase, mu type 3
Hmox2	-1.5496	0.048398	-2.0076	0.001183	NM_024387	Hmox2	Heme oxygenase (decycling) 2
Hspa1a	3.1963	0.027819	-1.6545	0.084969	NM_031971	Hspa1a	Heat shock 70kD protein 1A
Hspa4	1.787	0.012913	1.3576	0.223564	NM_153629	Hspa4	Heat shock protein 4
Hspa5	-3.1439	0.005573	1.3697	0.061829	NM_013083	Hspa5	Heat shock 70kDa protein 5 (glucose-regulated protein)
Hspb1	5.7027	0.000724	1.0726	0.698213	NM_031970	Hspb1	Heat shock 27kDa protein 1
Il18	-2.757	0.000752	-1.5017	0.403308	NM_019165	Il18	Interleukin 18
Lta	-3.2595	0.023553	-1.6698	0.281099	NM_080769	Lta	Lymphotoxin A
Mdm2	4.7891	0.00043	1.5788	0.00553	XM_235169	Mdm2	Transformed mouse 3T3 cell double minute 2
Pcna	1.5817	0.037347	1.2233	0.478186	NM_022381	Pcna	Proliferating cell nuclear antigen
Rad23a	2.0111	0.008813	-3.0694	0.000427	NM_001013190	Rad23a	RAD23a homolog (S. cerevisiae)
Sod1	-1.5723	0.039768	-1.235	0.006913	NM_017050	Sod1	Superoxide dismutase 1
Sod2	-1.4405	0.04265	-1.332	0.158355	NM_017051	Sod2	Superoxide dismutase 2, mitochondrial
Tnfrsf1a	1.9245	0.007807	2.076	0.000375	NM_013091	Tnfrsf1a	Tumor necrosis factor receptor superfamily, member 1a
Tnfsf10	-1.9852	0.019845	-5.678	0.00051	NM_145681	Tnfsf10	Tumor necrosis factor (ligand) superfamily, member 10
Ugt1a6	4.5207	0.000646	1.4829	0.003706	NM_057105	Ugt1a6	UDP glycosyltransferase 1 family, polypeptide A6
Xrcc4	-17.6416	3e-06	-3.2682	0.00463	NM_001006999	Xrcc4	X-ray repair complementing defective repair in Chinese hamster cells 4
RGDC	-1.8559	0.02179	-1.3078	0.143859	U26919	RGDC	Rat Genomic DNA Contamination
PPC	-2.4458	0.01378	-1.3072	0.19264	SA_00103	PPC	Positive PCR Control
PPC	-2.3531	0.011024	-1.068	0.701189	SA_00103	PPC	Positive PCR Control
PPC	-2.7783	0.0029	13.1801	0.380094	SA_00103	PPC	Positive PCR Control

## Sheet: 48h p<0.05
	24h FC	24h pvalue	48h FC	48h pvalue	Refseq	Symbol	Description
Anxa5	-1.4231	0.123137	-1.7038	0.001791	NM_013132	Anxa5	Annexin A5
Atm	-2.9286	0.00529	-1.583	0.001767	XM_236275	Atm	Ataxia telangiectasia mutated homolog (human)
Bax	2.4136	0.029373	1.8542	0.000537	NM_017059	Bax	Bcl2-associated X protein
Casp1	-1.6364	0.017502	-2.6759	0.005922	NM_012762	Casp1	Caspase 1
Casp8	1.1226	0.646855	-2.1694	0.028123	NM_022277	Casp8	Caspase 8
Ccl3	1.6737	0.230657	-4.5981	0.003799	NM_013025	Ccl3	Chemokine (C-C motif) ligand 3
Ccl4	1.2598	0.487421	-6.065	0.008121	NM_053858	Ccl4	Chemokine (C-C motif) ligand 4
Cdkn1a	6.3317	0.001724	4.6147	0.005358	NM_080782	Cdkn1a	Cyclin-dependent kinase inhibitor 1A
Cxcl10	2.6654	0.176789	-13.9571	0.001848	NM_139089	Cxcl10	Chemokine (C-X-C motif) ligand 10
Cyp1a1	4.2836	0.006157	19.6436	0.001886	NM_012540	Cyp1a1	Cytochrome P450, family 1, subfamily a, polypeptide 1
Cyp2a3a	-5.1238	0.028253	-3.563	0.00236	NM_012542	Cyp2a3a	Cytochrome P450, family 2, subfamily A, polypeptide 3a
Cyp4a3	-1.3679	0.029277	-1.2969	0.009255	NM_175760	Cyp4a3	Cytochrome P450, family 4, subfamily a, polypeptide 3
Cyp4a1	-1.2229	0.082441	-2.1985	6.6e-05	NM_175837	Cyp4a1	Cytochrome P450, family 4, subfamily a, polypeptide 1
Dnaja1	-1.1016	0.767145	-1.9946	0.017171	NM_022934	Dnaja1	DnaJ (Hsp40) homolog, subfamily A, member 1
Ephx2	-1.8778	0.018882	-4.8154	0.040572	NM_022936	Ephx2	Epoxide hydrolase 2, cytoplasmic
Fmo1	-4.7561	0.000892	-17.6565	0.000567	NM_012792	Fmo1	Flavin containing monooxygenase 1
Fmo4	-2.2945	0.001876	-2.2368	0.015905	NM_144562	Fmo4	Flavin containing monooxygenase 4
Gpx1	-2.4419	0.002808	-3.9379	2.4e-05	NM_030826	Gpx1	Glutathione peroxidase 1
Gpx2	13.6938	0.000186	2.9806	0.004747	NM_183403	Gpx2	Glutathione peroxidase 2
Gsr	1.5657	0.020744	-1.4578	0.001313	NM_053906	Gsr	Glutathione reductase
Gstm1	5.4533	0.000212	2.1937	0.00577	NM_017014	Gstm1	Glutathione S-transferase, mu 1
Gstm3	-2.3019	0.005132	-4.4364	6e-06	NM_031154	Gstm3	Glutathione S-transferase, mu type 3
Hmox1	1.4263	0.051276	3.411	0.027417	NM_012580	Hmox1	Heme oxygenase (decycling) 1
Hmox2	-1.5496	0.048398	-2.0076	0.001183	NM_024387	Hmox2	Heme oxygenase (decycling) 2
Hsph1	1.3721	0.297737	-2.5979	0.01015	NM_001011901	Hsph1	Heat shock 105kDa/110kDa protein 1
Hspa8	1.3893	0.158771	-4.2134	0.001011	NM_024351	Hspa8	Heat shock protein 8
Il1b	-1.1882	0.757831	-3.9536	0.016127	NM_031512	Il1b	Interleukin 1 beta
RGD1560340_predicted	1.7914	0.064584	-1.3662	0.026201	XM_222534	RGD1560340_predicted	Similar to ERCC4_MOUSE (predicted)
Mdm2	4.7891	0.00043	1.5788	0.00553	XM_235169	Mdm2	Transformed mouse 3T3 cell double minute 2
Nfkb1	-1.3325	0.26612	-1.5477	0.026683	XM_342346	Nfkb1	Nuclear factor of kappa light chain gene enhancer in B-cells 1, p105
Nos2	1.3301	0.627482	7.3384	0.000495	NM_012611	Nos2	Nitric oxide synthase 2, inducible
Por	1.1851	0.238028	5.6547	0.005044	NM_031576	Por	P450 (cytochrome) oxidoreductase
Rad23a	2.0111	0.008813	-3.0694	0.000427	NM_001013190	Rad23a	RAD23a homolog (S. cerevisiae)
Rad50	-1.1456	0.640054	-2.2941	0.001581	NM_022246	Rad50	RAD50 homolog (S. cerevisiae)
Sod1	-1.5723	0.039768	-1.235	0.006913	NM_017050	Sod1	Superoxide dismutase 1
Tnfrsf1a	1.9245	0.007807	2.076	0.000375	NM_013091	Tnfrsf1a	Tumor necrosis factor receptor superfamily, member 1a
Tnfsf10	-1.9852	0.019845	-5.678	0.00051	NM_145681	Tnfsf10	Tumor necrosis factor (ligand) superfamily, member 10
Faslg	-1.6784	0.076963	-1.9661	0.008799	NM_012908	Faslg	Fas ligand (TNF superfamily, member 6)
Tradd	1.0907	0.677348	-2.2144	0.003271	XM_341671	Tradd	TNFRSF1A-associated via death domain
Ugt1a6	4.5207	0.000646	1.4829	0.003706	NM_057105	Ugt1a6	UDP glycosyltransferase 1 family, polypeptide A6
Xrcc1	-1.2748	0.348174	-2.1138	0.000473	NM_053435	Xrcc1	X-ray repair complementing defective repair in Chinese hamster cells 1
Xrcc4	-17.6416	3e-06	-3.2682	0.00463	NM_001006999	Xrcc4	X-ray repair complementing defective repair in Chinese hamster cells 4
Hprt	-1.0696	0.505272	-1.3946	0.024913	NM_012583	Hprt	Hypoxanthine guanine phosphoribosyl transferase
Ldha	1.2874	0.057082	1.3127	0.02217	NM_017025	Ldha	Lactate dehydrogenase A
Actb	-1.5252	0.308794	-1.4626	0.011959	NM_031144	Actb	Actin, beta
