# Supplementary material for: Analysis of Common and Specific Mechanisms of Liver Function Affected by Nitrotoluene Compounds
Source: PLoS One. 2011 Feb 8;6(2):e14662. doi: 10.1371/journal.pone.0014662 (PMC3035612; doi:10.1371/journal.pone.0014662)
Supplement: Table S13 — A table (supplementary table 13) providing a list of lipid species that were measured in the project. (0.02 MB XLSX) [file pone.0014662.s013.xlsx]

## Sheet: Sheet1
Supplementary table 13 Lipid species measured in the project
Lipid species	Masses of + ions	Chemical formula
LysoPC 16:1	494.3	C24H49O7PN
LysoPC 16:0	496.3	C24H51O7PN
LysoPC 18:3	518.3	C26H49O7PN
LysoPC 18:2	520.3	C26H51O7PN
LysoPC 18:1	522.4	C26H53O7PN
LysoPC 18:0	524.4	C26H55O7PN
LysoPC 20:5	542.3	C28H49O7PN
LysoPC 20:4	544.3	C28H51O7PN
LysoPC 20:3	546.5	C28H53O7PN
LysoPC 20.2	548.4	C28H55O7PN
LysoPC 20:1	550.4	C28H57O7PN
LysoPC 20:0	552.4	C28H59O7PN
LysoPC 22:6	568.3	C30H51O7PN
LysoPC 22:5	570.4	C30H53O7PN
Total LysoPC
PC 28:1	676.5	C36H69O8PN
PC 28:0	678.5	C36H71O8PN
PC 30:1	704.5	C38H75O8PN
PC 30:0	706.5	C38H77O8PN
PC 32:2	730.5	C40H77O8PN
PC 32:1	732.6	C40H79O8PN
PC 32:0	734.6	C40H81O8PN
PC 34:4	754.5	C42H77O8PN
PC 34:3	756.6	C42H79O8PN
PC 34:2	758.6	C42H81O8PN
PC 34:1	760.6	C42H83O8PN
PC 34:0	762.6	C42H85O8PN
PC 36:6	778.5	C44H77O8PN
PC 36:5	780.6	C44H79O8PN
PC 36:4	782.6	C44H81O8PN
PC 36:3	784.6	C44H83O8PN
PC 36:2	786.6	C44H85O8PN
PC 36:1	788.6	C44H87O8PN
PC 36:0 or ePC 38:7	790.6	C44H89O8PN
PC 38:6	806.6	C46H81O8PN
PC 38:5	808.6	C46H83O8PN
PC 38:4	810.6	C46H85O8PN
PC 38:3	812.6	C46H87O8PN
PC 38:2	814.6	C46H89O8PN
PC 38:1 or ePC 40:8	816.6	C46H91O8PN
PC 38:0 or ePC 40:7	818.7	C46H93O8PN
PC 40:8	830.6	C48H81O8PN
PC 40:7	832.6	C48H83O8PN
PC 40:6	834.6	C48H85O8PN
PC 40:5	836.6	C48H87O8PN
PC 40:4	838.6	C48H89O8PN
PC 40:3	840.6	C48H91O8PN
PC 40:2	842.7	C48H93O8PN
PC 42:11	852.6	C50H79O8PN
PC 42:10	854.6	C50H81O8PN
PC 42:9	856.6	C50H83O8PN
PC 42:8	858.6	C50H85O8PN
PC 42:7	860.6	C50H87O8PN
PC 42:6	862.6	C50H89O8PN
PC 42:5	864.6	C50H91O8PN
PC 42:4	866.7	C50H93O8PN
PC 42:3	868.7	C50H95O8PN
PC 42:2	870.7	C50H97O8PN
PC 44:12	878.6	C52H81O8PN
PC 44:11	880.6	C52H83O8PN
PC 44:10	882.6	C52H85O8PN
PC 44:9	884.6	C52H87O8PN
PC 44:8	886.6	C52H89O8PN
PC 44:7	888.6	C52H91O8PN
PC 44:6	890.7	C52H93O8PN
PC 44:5	892.7	C52H95O8PN
PC 44:4	894.7	C52H97O8PN
PC 44:3	896.7	C52H99O8PN
PC 44:2	898.7	C52H101O8PN
Total PC
SM 16:1	701.6	C39H78N2O6P
SM 16:0 (or DSM 16:1)	703.6	C39H80N2O6P
DSM 16:0	705.4	C39H802N2O6P
SM 18:1	729.6	C41H82N2O6P
SM 18:0 (or DSM 18:1)	731.6	C41H84N2O6P
DSM 18:0	733.6	C41H86N2O6P
SM 22:1	785.7	C45H90N2O6P
SM 22:0 or DSM 22:1)	787.7	C45H92N2O6P
DSM 22:0	789.5	C45H94N2O6P
SM 24:1	813.7	C47H94N2O6P
SM 24:0 (or DSM 24:1)	815.7	C47H96N2O6P
DSM 24:0	817.5	C47H98N2O6P
Total SM
ePC 32:3	714.5	C40H77O7PN
ePC 32:2	716.6	C40H79O7PN
ePC 32:1	718.6	C40H81O7PN
ePC 32:0	720.6	C40H83O7PN
ePC 34:4	740.6	C42H79O7PN
ePC 34:3	742.6	C42H81O7PN
ePC 34:2	744.6	C42H83O7PN
ePC 34:1	746.6	C42H85O7PN
ePC 34:0	748.6	C42H87O7PN
ePC 36:5	766.6	C44H81O7PN
ePC 36:4	768.6	C44H83O7PN
ePC 36:3	770.6	C44H85O7PN
ePC 36:2	772.6	C44H87O7PN
ePC 36:1	774.6	C44H89O7PN
ePC 36:0	776.7	C44H91O7PN
ePC 38:6	792.6	C46H83O7PN
ePC 38:5	794.6	C46H85O7PN
ePC 38:4	796.6	C46H87O7PN
ePC 38:3	798.6	C46H89O7PN
ePC 38:2	800.7	C46H91O7PN
ePC 38:1	802.7	C46H93O7PN
ePC 38:0	804.7	C46H95O7PN
ePC 40:6	820.6	C48H87O7PN
ePC 40:5	822.6	C48H89O7PN
ePC 40:4	824.7	C48H91O7PN
ePC 40:3	826.7	C48H93O7PN
ePC 40:2	828.7	C48H95O7PN
Total ePC
LysoPE 16:1	452.3	C21H43O7PN
LysoPE 16:0	454.3	C21H45O7PN
LysoPE 18:3	476.3	C23H43O7PN
LysoPE 18:2	478.3	C23H45O7PN
LysoPE 18:1	480.3	C23H49O7PN
LysoPE 20:5	500.3	C25H43O7PN
LysoPE 20:4	502.3	C25H45O7PN
LysoPE 20:3	504.3	C25H47O7PN
LysoPE 20.2	506.3	C25H49O7PN
LysoPE 20:1	508.3	C25H51O7PN
LysoPE 20:0	510.3	C25H53O7PN
LysoPE 22:6	526.3	C27H45O7PN
LysoPE 22:5	528.3	C27H47O7PN
Total LysoPE
PE 28:1	634.4	C33H65O8PN
PE 28:0	636.4	C33H67O8PN
PE 30:1	662.5	C35H69O8PN
PE 30:0	664.5	C35H71O8PN
PE 32:2	688.5	C37H71O8PN
PE 32:1	690.5	C37H73O8PN
PE 32:0	692.5	C37H75O8PN
PE 34:4	712.5	C39H71O8PN
PE 34:3	714.5	C39H73O8PN
PE 34:2	716.5	C39H75O8PN
PE 34:1	718.5	C39H77O8PN
PE 34:0	720.6	C39H79O8PN
PE 36:6	736.5	C41H71O8PN
PE 36:5	738.5	C41H73O8PN
PE 36:4	740.5	C41H75O8PN
PE 36:3	742.5	C41H77O8PN
PE 36:2	744.6	C41H79O8PN
PE 36:1	746.6	C41H81O8PN
PE 36:0 or ePE 38:7	748.6	C41H83O8PN
PE 38:6	764.5	C43H75O8PN
PE 38:5	766.5	C43H77O8PN
PE 38:4	768.6	C43H79O8PN
PE 38:3	770.6	C43H81O8PN
PE 38:2	772.6	C43H83O8PN
PE 38:1 or ePE 40:8	774.6	C43H85O8PN
PE 38:0 or ePE 40:7	776.6	C43H87O8PN
PE 40:8	788.5	C45H75O8PN
PE 40:7	790.5	C45H77O8PN
PE 40:6	792.6	C45H79O8PN
PE 40:5	794.6	C45H81O8PN
PE 40:4	796.6	C45H83O8PN
PE 40:3	798.6	C45H85O8PN
PE 40:2	800.6	C45H87O8PN
PE 42:10	812.5	C47H75O8PN
PE 42:9	814.5	C47H77O8PN
PE 42:8	816.6	C47H79O8PN
PE 42:7	818.6	C47H81O8PN
PE 42:6	820.6	C47H83O8PN
PE 42:5	822.6	C47H85O8PN
PE 42:4	824.6	C47H87O8PN
PE 42:3	826.6	C47H89O8PN
PE 42:2	828.6	C47H91O8PN
PE 44:12	836.5	C49H75O8PN
PE 44:11	838.5	C49H77O8PN
PE 44:10	840.6	C49H79O8PN
PE 44:9	842.6	C49H81O8PN
PE 44:8	844.6	C49H83O8PN
PE 44:7	846.6	C49H85O8PN
PE 44:6	848.6	C49H87O8PN
PE 44:5	850.6	C49H89O8PN
PE 44:4	852.6	C49H91O8PN
PE 44:3	854.7	C49H93O8PN
PE 44:2	856.7	C49H95O8PN
Total PE
PE-cer 16:1	659.5	C36H72O6PN2
PE-cer 16:0	661.5	C36H74O6PN2
PE-cer 18:1	687.5	C38H76O6PN2
PE-cer 18:0	689.6	C38H78O6PN2
PE-cer 24:0	773.7	C44H90O6PN2
Total PE-cer
ePE 32:3	672.5	C37H71O7PN
ePE 32:2	674.5	C37H73O7PN
ePE 32:1	676.5	C37H75O7PN
ePE 32:0	678.5	C37H77O7PN
ePE 34:4	698.5	C39H73O7PN
ePE 34:3	700.5	C39H75O7PN
ePE 34:2	702.5	C39H77O7PN
ePE 34:1	704.6	C39H79O7PN
ePE 34:0	706.6	C39H81O7PN
ePE 36:5	724.5	C41H75O7PN
ePE 36:4	726.5	C41H77O7PN
ePE 36:3	728.6	C41H79O7PN
ePE 36:2	730.6	C41H81O7PN
ePE 36:1	732.6	C41H83O7PN
ePE 36:0	734.6	C41H85O7PN
ePE 38:6	750.5	C43H77O7PN
ePE 38:5	752.6	C43H79O7PN
ePE 38:4	754.6	C43H81O7PN
ePE 38:3	756.6	C43H83O7PN
ePE 38:2	758.6	C43H85O7PN
ePE 38:1	760.6	C43H87O7PN
ePE 38:0	762.6	C43H89O7PN
ePE 40:6	778.6	C45H81O7PN
ePE 40:5	780.6	C45H83O7PN
ePE 40:4	782.6	C45H85O7PN
ePE 40:3	784.6	C45H87O7PN
ePE 40:2	786.6	C45H89O7PN
Total ePE
PI 34:4	848.5	C43H79O13PN
PI 34:3	850.5	C43H81O13PN
PI 34:2	852.6	C43H83O13PN
PI 34:1	854.6	C43H85O13PN
PI 36:6	872.5	C45H79O13PN
PI 36:5	874.5	C45H81O13PN
PI 36:4	876.6	C45H83O13PN
PI 36:3	878.6	C45H85O13PN
PI 36:2	880.6	C45H87O13PN
PI 36:1	882.6	C45H89O13PN
PI 38:6	900.6	C47H83O13PN
PI 38:5	902.6	C47H85O13PN
PI 38:4	904.6	C47H87O13PN
PI 38:3	906.6	C47H89O13PN
PI 38:2	908.6	C47H91O13PN
PI 38:1	910.6	C47H93O13PN
PI 38:0	912.7	C47H95O13PN
PI 40:8	924.6	C49H83O13PN
PI 40:7	926.6	C49H85O13PN
PI 40:6	928.6	C49H87O13PN
PI 40:5	930.6	C49H89O13PN
PI 40:4	932.6	C49H91O13PN
PI 40:3	934.6	C49H93O13PN
PI 40:2	936.7	C49H95O13PN
PI 40:1	938.7	C49H97O13PN
PI 40:0	940.7	C49H99O13PN
PI 42:10	948.6	C51H83O13PN
PI 42:9	950.6	C51H85O13PN
PI 42:8	952.6	C51H87O13PN
PI 42:7	954.6	C51H89O13PN
PI 42:6	956.6	C51H91O13PN
PI 42:5	958.6	C51H93O13PN
PI 42:4	960.7	C51H95O13PN
PI 42:3	962.7	C51H97O13PN
PI 42:2	964.7	C51H99O13PN
PI 44:12	972.6	C53H83O13PN
PI 44:11	974.6	C53H85O13PN
PI 44:10	976.6	C53H87O13PN
PI 44:9	978.6	C53H89O13PN
PI 44:8	980.6	C53H91O13PN
PI 44:7	982.6	C53H93O13PN
PI 44:6	984.7	C53H95O13PN
PI 44:5	986.7	C53H97O13PN
PI 44:4	988.7	C53H99O13PN
PI 44:3	990.7	C53H101O13PN
PI 44:2	992.7	C53H103O13PN
total PI
PS 32:1	734.5	C38H73O10PN
PS 32:0	736.5	C38H75O10PN
PS 34:4	756.5	C40H71O10PN
PS 34:3	758.5	C40H73O10PN
PS 34:2	760.5	C40H75O10PN
PS 34:1	762.5	C40H77O10PN
PS 34:0	764.5	C40H79O10PN
PS 36:6	780.5	C42H71O10PN
PS 36:5	782.5	C42H73O10PN
PS 36:4	784.5	C42H75O10PN
PS 36:3	786.5	C42H77O10PN
PS 36:2	788.5	C42H79O10PN
PS 36:1	790.6	C42H81O10PN
PS 36:0	792.6	C42H83O10PN
PS 38:7 (ePS 38:0)	806.5	C44H73O10PN
PS 38:6	808.5	C44H75O10PN
PS 38:5	810.5	C44H77O10PN
PS 38:4	812.5	C44H79O10PN
PS 38:3	814.6	C44H81O10PN
PS 38:2	816.6	C44H83O10PN
PS 38:1	818.6	C44H85O10PN
(PS 38:0)	820.6	C44H87O10PN
PS 40:8 (ePS 40:1)	832.5	C46H75O10PN
PS 40:7 (ePS 40:0)	834.5	C46H77O10PN
PS 40:6	836.5	C46H79O10PN
PS 40:5	838.6	C46H81O10PN
PS 40:4	840.6	C46H83O10PN
PS 40:3	842.6	C46H85O10PN
PS 40:2	844.6	C46H87O10PN
PS 40:1	846.6	C46H89O10PN
PS 42:11	854.5	C48H73O10PN
PS 42:10	856.5	C48H75O10PN
PS 42:9	858.5	C48H77O10PN
PS 42:8	860.5	C48H79O10PN
PS 42:7	862.6	C48H81O10PN
PS 42:6	864.6	C48H83O10PN
PS 42:5	866.6	C48H85O10PN
(PS 42:4)	868.6	C48H87O10PN
(PS 42:3)	870.6	C48H89O10PN
(PS 42:2)	872.6	C48H91O10PN
PS 44:12	880.5	C50H75O10PN
PS 44:11	882.5	C50H77O10PN
PS 44:10	884.5	C50H79O10PN
PS 44:9	886.6	C50H81O10PN
PS 44:8	888.6	C50H83O10PN
PS 44:7	890.6	C50H85O10PN
PS 44:6	892.6	C50H87O10PN
PS 44:5	894.6	C50H89O10PN
PS 44:4	896.6	C50H91O10PN
PS 44:3	898.7	C50H93O10PN
PS 44:2	900.7	C50H95O10PN
total PS
ePS 34:2	746.5	C40H77O9PN
ePS 34:1	748.5	C40H79O9PN
ePS 36:3	772.5	C42H79O9PN
ePS 36:2	774.6	C42H81O9PN
ePS 36:1	776.6	C42H83O9PN
ePS 36:0	778.6	C42H85O9PN
ePS 38:6	794.5	C44H77O9PN
ePS 38:5	796.5	C44H79O9PN
ePS 38:4	798.6	C44H81O9PN
ePS 38:3	800.6	C44H83O9PN
ePS 38:2	802.6	C44H85O9PN
ePS 38:1	804.6	C44H87O9PN
ePS 40:5	824.6	C46H83O9PN
ePS 40:4	826.6	C46H85O9PN
ePS 40:3	828.6	C46H87O9PN
ePS 40:2	830.6	C46H89O9PN
Total ePS
PA 32:4?	658.4	C35H65O8PN
PA 32:3?	660.5	C35H67O8PN
PA 32:2?	662.5	C35H69O8PN
PA 32:1?	664.5	C35H71O8PN
PA 32:0?	666.5	C35H73O8PN
PA 34:4	686.5	C37H69O8PN
PA 34:3	688.5	C37H71O8PN
PA 34:2	690.5	C37H73O8PN
PA 34:1	692.5	C37H75O8PN
PA 36:6	710.5	C39H69O8PN
PA 36:5	712.5	C39H71O8PN
PA 36:4	714.5	C39H73O8PN
PA 36:3	716.5	C39H75O8PN
PA 36:2	718.5	C39H77O8PN
PA 38:6	738.5	C41H73O8PN
PA 38:5	740.5	C41H75O8PN
PA 38:4	742.5	C41H77O8PN
PA 38:3	744.6	C41H79O8PN
PA 38:2	746.6	C41H81O8PN
PA 40:7	764.5	C43H75O8PN
PA 40:6	766.5	C43H77O8PN
PA 40:5	768.6	C43H79O8PN
Total PA
